# Supplementary material for: Evolution towards simplicity in bacterial small heat shock protein system
Source: eLife. 2023 Dec 8;12:RP89813. doi: 10.7554/eLife.89813 (PMC10708888; doi:10.7554/eLife.89813)
Supplement: Figure 1—source data 1. [file elife-89813-fig1-data1.xlsx]

## Sheet: Arkusz1
	Luciferase activity (repeat 1)	Luciferase activity (repeat 2)	Luciferase activity (repeat 3)
native	97382596	107036984	93696644
No sHsp	18007239	15640000	1.22262e+07
IbpA E.coli	30861293	33662206	3.14334e+07
IbpB E.coli	21722288	22177757	17747029
IbpaA + IbpB E.coli	85061936	71923460	85945728
IbpA E.amylovora	62704016	65766478	61996252
