# Supplementary material for: Evolution towards simplicity in bacterial small heat shock protein system
Source: eLife. 2023 Dec 8;12:RP89813. doi: 10.7554/eLife.89813 (PMC10708888; doi:10.7554/eLife.89813)
Supplement: Figure 3—figure supplement 1—source data 1. [file elife-89813-fig3-figsupp1-data1.xlsx]

## Sheet: Arkusz1
	X Volume	10 uM IbpA E.coli 25C1 AVG	10 uM IbpA E.coli 44C1 AVG	10 uM IbpA E.coli 25C2 AVG	10 uM IbpA E.coli 44C2 AVG	10uM IbpA E.coli 25C3 AVG
	0.4	0	0	0	0	0
	0.463	0	0	0	0	0
	0.536	0	0	0	0	0
	0.621	0	0	0	0	0
	0.719	0	0	0	0	0
	0.833	0	0	0	0	0
	0.965	0	0	0	0	0
	1.12	0	0	0	0	0
	1.29	0	0	0	0	0
	1.5	0	0	0	0	0
	1.74	0	0	0	0	0
	2.01	0	0	0	0	0
	2.33	0	0	0	0	0
	2.7	0	0	0	0	0
	3.12	0	0	0	0	0
	3.62	0	0	0	0	0
	4.19	0	0	0	0	0
	4.85	0	0	0	0	0
	5.61	0.259	0	0.356	0	0.307
	6.5	1.02	0.173	1.73	0.334	1.44
	7.53	1.79	0.808	3.53	1.76	2.98
	8.72	2.01	2.65	4.83	4.47	3.97
	10.1	2.11	6.75	5.81	8.41	4.21
	11.7	2.59	12.3	6.11	13.3	4.13
	13.5	3.42	16.4	5.52	16.7	4.4
	15.7	4.77	17.2	4.83	16.5	5.31
	18.2	6.49	14.5	4.57	13.2	6.62
	21	7.89	10.3	5.2	8.95	8.08
	24.4	8.86	6.31	6.72	5.36	9.06
	28.2	9.49	3.44	8.08	2.93	9.07
	32.7	9.53	1.78	8.35	1.54	8.18
	37.8	8.78	0.969	7.55	0.868	6.79
	43.8	7.43	0.63	6.14	0.575	5.28
	50.7	5.83	0.49	4.6	0.449	3.9
	58.8	4.31	0.419	3.24	0.381	2.77
	68.1	3.02	0.367	2.17	0.323	1.91
	78.8	2.04	0.311	1.41	0.267	1.29
	91.3	1.34	0.253	0.897	0.215	0.864
	106	0.87	0.198	0.577	0.17	0.581
	122	0.569	0.153	0.386	0.135	0.4
	142	0.387	0.121	0.281	0.111	0.291
	164	0.29	0.103	0.237	0.1	0.234
	190	0.253	0.0977	0.234	0.0988	0.212
	220	0.246	0.101	0.252	0.103	0.208
	255	0.251	0.111	0.281	0.109	0.214
	295	0.257	0.129	0.319	0.12	0.232
	342	0.259	0.159	0.363	0.135	0.264
	396	0.246	0.196	0.403	0.153	0.306
	459	0.212	0.232	0.422	0.17	0.348
	531	0.169	0.264	0.42	0.185	0.39
	615	0.138	0.293	0.416	0.204	0.441
	712	0.125	0.308	0.412	0.22	0.492
	825	0.116	0.283	0.4	0.22	0.509
	955	0.111	0.219	0.374	0.198	0.478
	1110	0.117	0.144	0.335	0.164	0.425
	1280	0.133	0.0869	0.294	0.13	0.377
	1480	0.163	0.0558	0.261	0.101	0.35
	1720	0.214	0.0445	0.246	0.0818	0.359
	1990	0.262	0.0399	0.234	0.0668	0.374
	2300	0.265	0.0334	0.201	0.0537	0.347
	2670	0.244	0.0298	0.17	0.0512	0.301
	3090	0.231	0.0367	0.16	0.0623	0.275
	3580	0.224	0.0552	0.164	0.0774	0.267
	4150	0.209	0.0873	0.164	0.0858	0.255
	4800	0.213	0.143	0.172	0.0904	0.245
	5560	0.181	0.145	0.142	0.0707	0.184
	6440	0.0664	0.0556	0.0504	0.024	0.0618
	7460	0	0	0	0	0
	8630	0	0	0	0	0
	X Volume	10 uM IbpA E.amylovora 25C1	10 uM IbpA E.amylovora 44C1	10 uM IbpA E.amylovora 25C2	10 uM IbpA E.amylovora 44C2	10 uM IbpA E.amylovora 25C3
	0.4	0	0	0	0	0
	0.463	0	0	0	0	0
	0.536	0	0	0	1.12	0
	0.621	0	0	0	3.08	0
	0.719	0	0	0	3.22	0
	0.833	0	0	0	1.79	0
	0.965	0	0	0	0.647	0
	1.12	0	0	0	0.114	0
	1.29	0	0	0	0	0
	1.5	0	0	0	0	0
	1.74	0	0	0	0	0
	2.01	0	0	0	0	0
	2.33	0	0.18	0	0	0
	2.7	0	0.691	0	0	0
	3.12	0	1.13	0	0	0
	3.62	0	1.1	0	0	0
	4.19	0.143	0.85	0	0	0
	4.85	0.746	1.28	0	0.426	0.0398
	5.61	1.53	3.58	0	2.77	0.135
	6.5	1.78	8.43	0	7.89	0.195
	7.53	1.6	14.3	0	13.6	0.21
	8.72	1.62	17.7	0.0347	16.5	0.45
	10.1	2.24	17.1	0.58	15.8	1.61
	11.7	4.2	13.6	2.92	12.7	4.61
	13.5	7.73	9.37	7.55	8.95	9.13
	15.7	11.3	5.63	12.6	5.58	13.2
	18.2	13.2	2.95	15.8	3.11	15
	21	13.1	1.34	16	1.54	14.5
	24.4	11.6	0.508	13.9	0.662	12.4
	28.2	9.29	0.155	10.8	0.241	9.68
	32.7	6.91	0.0378	7.64	0.0704	6.99
	37.8	4.8	0.0096	4.99	0.0163	4.72
	43.8	3.15	0.00456	3.05	0.00339	3
	50.7	1.95	0.00278	1.75	0.000953	1.8
	58.8	1.14	0.00137	0.956	0.00042	1.02
	68.1	0.626	0.000635	0.493	0.000248	0.542
	78.8	0.324	0.000671	0.238	0.000205	0.268
	91.3	0.156	0.0013	0.105	0.000218	0.122
	106	0.0685	0.00221	0.0409	0.000258	0.0497
	122	0.027	0.0031	0.0136	0.000341	0.0174
	142	0.00929	0.00389	0.00413	0.000542	0.00489
	164	0.00268	0.00469	0.00187	0.000981	0.000972
	190	0.000657	0.00547	0.00149	0.00174	0.000105
	220	0.000149	0.00603	0.0012	0.0028	0
	255	2.34e-05	0.00627	0.000903	0.00416	0
	295	1.35e-05	0.00621	0.000964	0.00585	0
	342	9.46e-05	0.00589	0.00147	0.00785	0
	396	0.000395	0.00522	0.00221	0.00978	0
	459	0.00119	0.00408	0.00297	0.011	1.34e-05
	531	0.00284	0.00264	0.00371	0.0112	9.48e-05
	615	0.00577	0.0014	0.00445	0.0106	0.000354
	712	0.0101	0.000676	0.00503	0.00916	0.000923
	825	0.0152	0.000317	0.00509	0.007	0.00189
	955	0.0203	0.000115	0.00478	0.00485	0.00334
	1110	0.0257	2.19e-05	0.00496	0.00349	0.00549
	1280	0.0326	0	0.00678	0.00293	0.0088
	1480	0.0432	0	0.012	0.00271	0.0141
	1720	0.0614	0	0.0246	0.00259	0.0229
	1990	0.0801	0	0.0431	0.00226	0.0328
	2300	0.0866	6.96e-05	0.0589	0.00154	0.0381
	2670	0.0836	0.000469	0.0662	0.00093	0.0385
	3090	0.0792	0.00162	0.0666	0.000897	0.0375
	3580	0.0747	0.00344	0.0628	0.00153	0.0364
	4150	0.0669	0.00542	0.0546	0.00295	0.0336
	4800	0.0596	0.00758	0.0464	0.00557	0.0308
	5560	0.0427	0.0069	0.0322	0.00596	0.0225
	6440	0.014	0.00251	0.0104	0.00233	0.00743
	7460	0	0	0	0	0
	8630	0	0	0	0	0
	X Volume	10 uM AncA0 25C1	10 uM AncA0 44C1	10 uM AncA0 25C2	10 uM AncA0 44C2	10 uM AncA0 25C3
	0.4	0	0	0	0	0
	0.463	0	0	0	0	0
	0.536	0	0	0	0	0
	0.621	0	0	0	0	0
	0.719	0	0	0	0	0
	0.833	0	0	0	0	0
	0.965	0	0	0	0	0
	1.12	0	0	0	0	0
	1.29	0	0	0	0	0
	1.5	0	0	0	0	0
	1.74	0	0	0	0	0
	2.01	0	0.000356	0	0	0
	2.33	0	0.156	0	0	0
	2.7	0	0.675	0.954	0	0
	3.12	0	1.37	3.18	0	0
	3.62	0	1.82	4.45	0.428	0
	4.19	0.201	1.81	3.95	2.06	0
	4.85	1.36	1.46	3.28	4.1	0.314
	5.61	3.6	1.54	3.07	4.97	1.47
	6.5	5.29	3.26	2.82	5.1	3.46
	7.53	5.46	6.53	2.61	5.91	5.51
	8.72	5.09	10.1	2.99	7.88	6.71
	10.1	5.05	13	3.98	10.5	6.77
	11.7	5.62	14.1	5.33	12.4	6.21
	13.5	7.02	13	6.77	12.5	6.16
	15.7	8.98	10.4	7.63	10.9	7.27
	18.2	10.4	7.42	7.75	8.3	8.63
	21	10.3	4.83	7.52	5.67	9.14
	24.4	8.76	2.92	7.01	3.52	8.57
	28.2	6.5	1.68	6.16	2.01	7.29
	32.7	4.35	0.946	5.07	1.07	5.76
	37.8	2.71	0.552	3.93	0.555	4.32
	43.8	1.65	0.357	2.91	0.309	3.13
	50.7	1.05	0.266	2.08	0.21	2.22
	58.8	0.751	0.221	1.45	0.176	1.56
	68.1	0.609	0.193	1.01	0.166	1.1
	78.8	0.535	0.171	0.706	0.158	0.783
	91.3	0.485	0.15	0.505	0.146	0.566
	106	0.44	0.13	0.372	0.132	0.418
	122	0.399	0.113	0.287	0.117	0.319
	142	0.366	0.0996	0.234	0.105	0.254
	164	0.352	0.093	0.208	0.0977	0.219
	190	0.353	0.092	0.201	0.0956	0.204
	220	0.353	0.0914	0.199	0.093	0.193
	255	0.339	0.0885	0.194	0.087	0.18
	295	0.312	0.0831	0.186	0.0779	0.165
	342	0.272	0.0757	0.174	0.0662	0.149
	396	0.22	0.0652	0.155	0.0519	0.13
	459	0.154	0.051	0.128	0.0354	0.107
	531	0.0896	0.0352	0.0949	0.02	0.085
	615	0.0414	0.0214	0.0658	0.0089	0.0702
	712	0.0142	0.0112	0.0451	0.00277	0.0619
	825	0.00284	0.00461	0.0334	0.000432	0.0542
	955	9.81e-05	0.00133	0.0273	0	0.0447
	1110	0	0.000211	0.023	0	0.0359
	1280	0	0	0.0195	0	0.03
	1480	0	0	0.017	0	0.0263
	1720	0	0	0.0163	0	0.0242
	1990	0	0.000133	0.0177	0	0.0232
	2300	0.000717	0.000986	0.0209	0	0.0246
	2670	0.00517	0.00291	0.0251	0	0.0304
	3090	0.0186	0.00549	0.0291	0	0.0385
	3580	0.0436	0.00767	0.0311	0	0.0445
	4150	0.0774	0.00862	0.0297	0	0.0449
	4800	0.116	0.00892	0.0273	0	0.043
	5560	0.108	0.00685	0.0197	0	0.0318
	6440	0.0393	0.00231	0.00648	0	0.0105
	7460	0	0	0	0	0
	8630	0	0	0	0	0
	X Volume	10 uM AncA1 25C1	10 uM AncA1 44C1	10 uM AncA1 25C2	10 uM AncA1 44C2	10 uM AncA1 25C3
	0.4	0	0	0	0	0
	0.463	0	0	0	0	0
	0.536	0	0	0	0	0
	0.621	0	0	0	0	0
	0.719	0	0	0	0	0
	0.833	0	0	0	0	0
	0.965	0	0	0	0	0
	1.12	0	0	0	0	0
	1.29	0	0	0	0	0
	1.5	0	0	0	0	0
	1.74	0	0	0	0	0
	2.01	0	0	0	0	0
	2.33	0	0	0	0	0
	2.7	0	0	0	0	0
	3.12	0	0	0	0	0
	3.62	0	0	0	0	0
	4.19	0	0	0	0	0
	4.85	0	0	0	0	0
	5.61	0	0	0	0	0.133
	6.5	0.0429	0.0038	0.176	0	0.784
	7.53	0.422	0.7	0.664	0.188	1.82
	8.72	1.32	3.9	1.29	2.15	2.25
	10.1	2.29	9.69	1.92	7.43	1.78
	11.7	3.03	14.9	2.52	13.9	1.43
	13.5	3.92	17	3.58	17.6	2.51
	15.7	5.69	15.9	5.81	17.6	5.34
	18.2	8.55	13	8.94	14.8	8.97
	21	11.4	9.54	11.7	10.9	11.9
	24.4	12.8	6.41	13	7.13	13.1
	28.2	12.5	3.97	12.6	4.21	12.6
	32.7	10.9	2.27	10.9	2.23	10.8
	37.8	8.68	1.2	8.67	1.05	8.56
	43.8	6.42	0.579	6.4	0.426	6.29
	50.7	4.45	0.249	4.44	0.142	4.35
	58.8	2.91	0.093	2.9	0.0366	2.84
	68.1	1.81	0.0282	1.8	0.00673	1.76
	78.8	1.06	0.00629	1.06	0.000769	1.04
	91.3	0.593	0.000866	0.588	1.47e-05	0.575
	106	0.312	6.98e-05	0.308	0	0.301
	122	0.153	7.73e-05	0.15	8.81e-06	0.146
	142	0.0686	0.000199	0.0671	4.7e-05	0.0643
	164	0.0274	0.000412	0.0267	0.000153	0.0246
	190	0.00932	0.000779	0.00921	0.00043	0.00757
	220	0.00236	0.00136	0.00265	0.00108	0.00158
	255	0.000323	0.00221	0.000554	0.0023	0.000143
	295	0.000107	0.00345	5.65e-05	0.00413	0
	342	0.000461	0.0053	0	0.00655	0
	396	0.00114	0.00781	0	0.00924	0
	459	0.00196	0.0108	0	0.0115	0
	531	0.00265	0.0145	0	0.0132	0
	615	0.00295	0.0193	0	0.0144	0
	712	0.00259	0.0251	0	0.0152	0
	825	0.00158	0.0303	0	0.0154	0
	955	0.000559	0.0337	0	0.0147	0
	1110	0.000426	0.0358	0	0.0137	0
	1280	0.00223	0.0381	0.000302	0.0126	2.39e-05
	1480	0.00803	0.0416	0.00213	0.0119	0.000929
	1720	0.0222	0.0483	0.00863	0.0122	0.00604
	1990	0.0434	0.0526	0.0218	0.0125	0.0182
	2300	0.0626	0.0479	0.041	0.012	0.0365
	2670	0.074	0.0387	0.0618	0.0123	0.0562
	3090	0.0809	0.0314	0.08	0.0145	0.0748
	3580	0.0868	0.0265	0.0909	0.018	0.0884
	4150	0.0884	0.0221	0.0902	0.0223	0.0912
	4800	0.0896	0.0187	0.0855	0.0285	0.0896
	5560	0.0691	0.0131	0.0627	0.0254	0.0672
	6440	0.0234	0.00425	0.0207	0.0092	0.0224
	7460	0	0	0	0	0
	8630	0	0	0	0	0
