# Supplementary material for: Evolution towards simplicity in bacterial small heat shock protein system
Source: eLife. 2023 Dec 8;12:RP89813. doi: 10.7554/eLife.89813 (PMC10708888; doi:10.7554/eLife.89813)
Supplement: Figure 3—figure supplement 3—source data 1. [file elife-89813-fig3-figsupp3-data1.xlsx]

## Sheet: Arkusz1
	X Volume	10 uM AncA0 alt_all 25C1	10 uM AncA0 alt_all 44C1	10 uM AncA0 alt_all 25C2	10 uM AncA0 alt_all 44C2	10 uM AncA0 alt_all 25C3
	0.4	0	0	0	0	0
	0.463	0	0	0	0	0
	0.536	0	0	0	0	0
	0.621	0	0	0	0	0
	0.719	0	0	0	0	0
	0.833	0	0	0	0	0
	0.965	0	0	0	0	0
	1.12	0	0	0	0	0
	1.29	0	0	0	0	0
	1.5	0	0	0	0	0
	1.74	0	0	0	0	0
	2.01	0	0	0	0	0
	2.33	0	0	0	0	0
	2.7	0	0	0	0	0
	3.12	0	0	0	0.145	0
	3.62	0	0	0	0.95	0
	4.19	0	0	0	2.16	0
	4.85	0.152	0	0	2.45	0
	5.61	0.827	0.272	0.00288	1.62	0
	6.5	1.8	1.04	0.265	1.34	0
	7.53	2.25	2.2	1.2	2.94	0.161
	8.72	2.06	4.21	2.51	5.41	0.661
	10.1	2.03	7.52	3.29	7.61	1.39
	11.7	2.87	11.4	3.35	9.82	2.24
	13.5	4.17	14.2	3.08	11.6	3.35
	15.7	5.22	14.4	2.71	11.8	4.6
	18.2	5.96	11.9	2.56	10.1	5.44
	21	6.45	8.06	3.04	7.53	5.86
	24.4	6.49	4.55	4.12	4.99	6.45
	28.2	5.87	2.17	5.42	3	7.15
	32.7	4.78	0.947	6.34	1.67	7.3
	37.8	3.67	0.487	6.46	0.882	6.59
	43.8	2.78	0.366	5.76	0.458	5.27
	50.7	2.09	0.334	4.5	0.26	3.77
	58.8	1.57	0.312	3.1	0.184	2.45
	68.1	1.16	0.287	1.9	0.164	1.47
	78.8	0.843	0.253	1.05	0.157	0.846
	91.3	0.603	0.212	0.544	0.149	0.495
	106	0.432	0.168	0.297	0.137	0.327
	122	0.318	0.131	0.209	0.124	0.263
	142	0.25	0.104	0.198	0.113	0.251
	164	0.22	0.0892	0.222	0.109	0.272
	190	0.22	0.087	0.272	0.109	0.31
	220	0.239	0.0934	0.344	0.111	0.344
	255	0.275	0.108	0.427	0.112	0.362
	295	0.336	0.132	0.513	0.116	0.363
	342	0.435	0.17	0.593	0.127	0.353
	396	0.579	0.221	0.651	0.148	0.34
	459	0.762	0.28	0.668	0.181	0.331
	531	0.998	0.349	0.659	0.234	0.361
	615	1.34	0.444	0.671	0.322	0.492
	712	1.76	0.559	0.736	0.447	0.759
	825	2.16	0.66	0.867	0.577	1.12
	955	2.42	0.721	1.06	0.681	1.5
	1110	2.56	0.762	1.3	0.755	1.84
	1280	2.65	0.818	1.57	0.815	2.17
	1480	2.75	0.928	1.97	0.879	2.54
	1720	2.94	1.15	2.69	0.98	3.07
	1990	2.92	1.34	3.48	1.03	3.42
	2300	2.4	1.31	3.76	0.918	3.16
	2670	1.76	1.11	3.54	0.759	2.57
	3090	1.36	0.918	3.16	0.659	2.07
	3580	1.17	0.765	2.78	0.608	1.73
	4150	1.06	0.622	2.34	0.555	1.48
	4800	1.01	0.513	1.98	0.516	1.35
	5560	0.769	0.353	1.38	0.382	1.01
	6440	0.26	0.114	0.446	0.127	0.339
	7460	0	0	0	0	0
	8630	0	0	0	0	0
	X Volume	10 uM AncA1 alt_all 25C1	10 uM AncA1 alt_all 44C1	10 uM AncA1 alt_all 25C2	10 uM AncA1 alt_all 44C2	10 uM AncA1 alt_all 25C3
	0.4	0	0	0	0	0
	0.463	0	0	0	0	0
	0.536	0	0	0	0	0
	0.621	0	0	0	0	0
	0.719	0	0	0	0	0
	0.833	0	0	0	0	0
	0.965	0	0	0	0	0
	1.12	0	0	0	0	0
	1.29	0	0	0	0	0
	1.5	0	0	0	0	0
	1.74	0	0	0	0	0
	2.01	0	0	0	0	0
	2.33	0	0	0	0	0
	2.7	0	0	0	0	0
	3.12	0	0	0	0	0
	3.62	0	0	0	0	0
	4.19	0	0	0	0	0
	4.85	0.152	0	0	0	0
	5.61	0.827	0.00114	0	0	0.257
	6.5	1.8	0.0403	0.207	0	1.39
	7.53	2.25	0.157	0.911	0.0294	3.27
	8.72	2.06	0.592	1.77	0.519	4.72
	10.1	2.03	2.38	2.15	2.71	4.93
	11.7	2.87	6.45	1.99	7.18	4.09
	13.5	4.17	11.6	1.83	12.1	2.9
	15.7	5.22	15.1	2.76	15.1	2.38
	18.2	5.96	15.8	5.52	15.5	3.51
	21	6.45	14.2	9.21	13.7	6.18
	24.4	6.49	11.3	12.1	10.9	9.03
	28.2	5.87	8.23	13	7.99	10.7
	32.7	4.78	5.55	12.3	5.44	10.9
	37.8	3.67	3.5	10.5	3.47	9.76
	43.8	2.78	2.07	8.21	2.08	8
	50.7	2.09	1.14	6.04	1.18	6.08
	58.8	1.57	0.591	4.2	0.625	4.34
	68.1	1.16	0.281	2.79	0.309	2.93
	78.8	0.843	0.121	1.77	0.14	1.88
	91.3	0.603	0.0458	1.08	0.0573	1.15
	106	0.432	0.0143	0.636	0.0202	0.676
	122	0.318	0.0034	0.361	0.00578	0.379
	142	0.25	0.000598	0.197	0.0012	0.201
	164	0.22	9.66e-05	0.104	0.000142	0.1
	190	0.22	2.16e-05	0.0506	1.84e-06	0.0439
	220	0.239	8.48e-05	0.0209	0	0.0145
	255	0.275	0.000368	0.00642	5.69e-06	0.0026
	295	0.336	0.00108	0.0014	7.89e-05	9.75e-05
	342	0.435	0.00248	0.000183	0.000417	0
	396	0.579	0.00471	0	0.00132	0
	459	0.762	0.00779	0	0.00307	0
	531	0.998	0.0119	0	0.00604	0
	615	1.34	0.0178	0	0.011	0
	712	1.76	0.0256	0	0.0184	0
	825	2.16	0.0339	0	0.0276	0
	955	2.42	0.0411	0	0.0372	0
	1110	2.56	0.0479	0	0.0474	0
	1280	2.65	0.0559	0	0.0595	0
	1480	2.75	0.0671	0	0.0756	0
	1720	2.94	0.0841	0.00114	0.0993	0
	1990	2.92	0.0964	0.00616	0.117	0.00087
	2300	2.4	0.0901	0.017	0.108	0.00463
	2670	1.76	0.0734	0.031	0.0846	0.0122
	3090	1.36	0.0585	0.045	0.0619	0.0237
	3580	1.17	0.0477	0.055	0.0452	0.0364
	4150	1.06	0.0384	0.0574	0.0325	0.0451
	4800	1.01	0.0315	0.0564	0.0237	0.0509
	5560	0.769	0.0216	0.0423	0.0151	0.0409
	6440	0.26	0.00696	0.0141	0.00469	0.0141
	7460	0	0	0	0	0
	8630	0	0	0	0	0
