# Supplementary material for: Evolution towards simplicity in bacterial small heat shock protein system
Source: eLife. 2023 Dec 8;12:RP89813. doi: 10.7554/eLife.89813 (PMC10708888; doi:10.7554/eLife.89813)
Supplement: Figure 3—figure supplement 3—source data 2. [file elife-89813-fig3-figsupp3-data2.xlsx]

## Sheet: Arkusz1
sHsp concentration [M]	IbpAEa		AncA0AltAll		AncA1AltAll
	Mean hydrodynamic diameter [nm]	SD	Mean hydrodynamic diameter [nm]	SD	Mean hydrodynamic diameter [nm]	SD
0	2042	1030	2106	1107	2049	1001
1	1577	708.1	1462	803.2	1645	852.2
2	1343	623.1	190.5	122.4	1230	716.8
3	498.5	315.6	64.98	39.43	180.8	117.2
5	117.6	53.93	58.57	41.41	58.14	38.96
7.5	71.84	30.35	130.4	104	87.08	60.04
10	61.34	28.37	98.19	80.55	113.1	83.88
