# Supplementary material for: Evolution towards simplicity in bacterial small heat shock protein system
Source: eLife. 2023 Dec 8;12:RP89813. doi: 10.7554/eLife.89813 (PMC10708888; doi:10.7554/eLife.89813)
Supplement: Figure 3—figure supplement 3—source data 3. [file elife-89813-fig3-figsupp3-data3.xlsx]

## Sheet: Arkusz1
	luciferase activity (repeat 1)	luciferase activity (repeat 2)	luciferase activity (repeat 3)
No sHsp	19191438	23892124	25945260
AncA0	6531710	7.13374e+06	7.55651e+06
AncA1	40389710	48995046	64429624
AncA0 alt_all	9.13964e+06	1.26315e+07	1.01497e+07
AncA1 alt_all	20011772	20736018	24175110
IbpA E.coli	27700374	45976742	5.13143e+07
IbpA E. amylovora	70111460	97418744	109957136
IbpA + IbpB E.coli	72022004	110170216	127606032
native	139848752	123273724	139293000
