# Supplementary material for: Evolution towards simplicity in bacterial small heat shock protein system
Source: eLife. 2023 Dec 8;12:RP89813. doi: 10.7554/eLife.89813 (PMC10708888; doi:10.7554/eLife.89813)
Supplement: Figure 3—figure supplement 3—source data 4. [file elife-89813-fig3-figsupp3-data4.xlsx]

## Sheet: Arkusz1
	luciferase activity (repeat 1)	luciferase activity (repeat 2)	luciferase activity (repeat 3)
No sHsp	27708918	27637135	24702825
AncA0	20813266	18529232	17112359
AncA1	129144652	115390092	119974440
AncA0 alt_all	50295818	31785220	37818932
AncA1 alt_all	102716876	99792076	96220764
IbpA E. amylovora	137617048	148906024	142107264
IbpA + IbpB E.coli	154377880	170962328	1.49914e+08
native	123550844	117529324	108874384
