# Supplementary material for: Evolution towards simplicity in bacterial small heat shock protein system
Source: eLife. 2023 Dec 8;12:RP89813. doi: 10.7554/eLife.89813 (PMC10708888; doi:10.7554/eLife.89813)
Supplement: Figure 3—source data 1. [file elife-89813-fig3-data1.xlsx]

## Sheet: Arkusz1
sHsp concentration [M]	IbpAEc		IbpAEa		AncA0		AncA1
	Mean hydrodynamic diameter [nm]	SD	Mean hydrodynamic diameter [nm]	SD	Mean hydrodynamic diameter [nm]	SD	Mean hydrodynamic diameter [nm]	SD
0	2209	1071	2042	1030	2106	1107	2049	1001
1	1155	632.7	1577	708.1	651.5	374.3	1205	594.5
2	66.67	34.83	1343	623.1	109.3	51.91	321.4	174.3
3	57.67	29.56	498.5	315.6	48.13	22.05	120.5	54.8
5	57.49	30.53	117.6	53.93	33.8	13.47	72.56	31.75
7.5	64.14	35.45	71.84	30.35	32.48	14.7	61.45	24.68
10	74.42	47.98	61.34	28.37	35.53	17.88	60.08	26.45
