# Supplementary material for: Evolution towards simplicity in bacterial small heat shock protein system
Source: eLife. 2023 Dec 8;12:RP89813. doi: 10.7554/eLife.89813 (PMC10708888; doi:10.7554/eLife.89813)
Supplement: Figure 3—source data 2. [file elife-89813-fig3-data2.xlsx]

## Sheet: Arkusz1
			Response [nm]
		Time [min]	AE.coli	A0	A1	AE.amy	No sHsps
		0	-0.07141	-0.11521	-0.07982	-0.02255	0.019322
		0.003333	-0.07107	-0.10939	-0.08617	-0.02336	0.019302
		0.006667	-0.07091	-0.11494	-0.08205	-0.01986	0.016875
		0.01	-0.07288	-0.11545	-0.08542	-0.02395	0.021218
		0.013333	-0.07478	-0.1136	-0.08269	-0.02226	0.02234
		0.016667	-0.07684	-0.11513	-0.07997	-0.02148	0.022126
		0.02	-0.07279	-0.11309	-0.08289	-0.0199	0.021369
		0.023333	-0.07436	-0.11027	-0.07989	-0.02177	0.019291
		0.026667	-0.07367	-0.11287	-0.0804	-0.02549	0.020221
		0.03	-0.07096	-0.11433	-0.0894	-0.02067	0.024303
		0.033333	-0.0715	-0.11346	-0.0822	-0.02408	0.023551
		0.036667	-0.07615	-0.11155	-0.08063	-0.01547	0.017539
		0.04	-0.07396	-0.11555	-0.08322	-0.01936	0.020013
		0.043333	-0.076	-0.11034	-0.08088	-0.02147	0.02227
		0.046667	-0.07313	-0.1111	-0.08597	-0.02574	0.018381
		0.05	-0.06895	-0.11409	-0.08302	-0.02049	0.019094
		0.053333	-0.06933	-0.10827	-0.08446	-0.01946	0.021239
		0.056667	-0.07058	-0.11334	-0.0821	-0.01812	0.017054
		0.06	-0.07355	-0.11407	-0.08094	-0.01857	0.018982
		0.063333	-0.07895	-0.11205	-0.07649	-0.0241	0.019276
		0.066667	-0.07312	-0.11706	-0.08147	-0.02221	0.019683
		0.07	-0.07236	-0.11377	-0.07957	-0.01914	0.019099
		0.073333	-0.07581	-0.11163	-0.08547	-0.02685	0.019984
		0.076667	-0.07186	-0.11467	-0.08033	-0.02401	0.017832
		0.08	-0.07243	-0.11188	-0.08123	-0.02008	0.018563
		0.083333	-0.07492	-0.11312	-0.08095	-0.02367	0.017981
		0.086667	-0.07409	-0.11198	-0.0842	-0.02585	0.01961
		0.09	-0.07343	-0.1138	-0.07866	-0.02115	0.015155
		0.093333	-0.07433	-0.10816	-0.08349	-0.02309	0.019687
		0.096667	-0.07358	-0.11458	-0.08406	-0.0227	0.016292
		0.1	-0.07524	-0.11286	-0.08287	-0.02156	0.019848
		0.103333	-0.07568	-0.11189	-0.08498	-0.0201	0.015135
		0.106667	-0.07215	-0.1162	-0.0847	-0.02336	0.020007
		0.11	-0.07576	-0.11214	-0.07896	-0.0191	0.020694
		0.113333	-0.0734	-0.11532	-0.08064	-0.02417	0.018315
		0.116667	-0.07315	-0.10975	-0.08542	-0.02357	0.01542
		0.12	-0.07543	-0.11789	-0.08707	-0.02467	0.01951
		0.123333	-0.07018	-0.11313	-0.08445	-0.01976	0.02076
		0.126667	-0.07332	-0.11669	-0.08149	-0.0231	0.021122
		0.13	-0.07615	-0.11224	-0.08482	-0.01992	0.016949
		0.133333	-0.07668	-0.11123	-0.08557	-0.02313	0.022372
		0.136667	-0.07075	-0.11565	-0.08574	-0.02234	0.016733
		0.14	-0.07128	-0.109	-0.08044	-0.02466	0.022833
		0.143333	-0.07385	-0.11301	-0.08442	-0.02252	0.020798
		0.146667	-0.07475	-0.11403	-0.0823	-0.0229	0.018209
		0.15	-0.07771	-0.11302	-0.0816	-0.02171	0.014501
		0.153333	-0.07282	-0.1097	-0.08563	-0.02183	0.020303
		0.156667	-0.07364	-0.11354	-0.08385	-0.02321	0.019736
		0.16	-0.07464	-0.11177	-0.07883	-0.02778	0.02084
		0.163333	-0.07181	-0.11192	-0.08148	-0.0168	0.021143
		0.166667	-0.07768	-0.1122	-0.08309	-0.02032	0.019396
		0.17	-0.07279	-0.11338	-0.08348	-0.02281	0.01864
		0.173333	-0.07337	-0.11066	-0.08094	-0.02122	0.018182
		0.176667	-0.07309	-0.11468	-0.08284	-0.02304	0.025274
		0.18	-0.07369	-0.11011	-0.08202	-0.02424	0.019136
		0.183333	-0.07387	-0.11329	-0.08455	-0.01913	0.019611
		0.186667	-0.07677	-0.11188	-0.08069	-0.0247	0.021317
		0.19	-0.07332	-0.10956	-0.07994	-0.02358	0.017767
		0.193333	-0.07438	-0.1091	-0.08368	-0.02112	0.023845
		0.196667	-0.07416	-0.11447	-0.08184	-0.02557	0.01749
		0.2	-0.07253	-0.11148	-0.08079	-0.02475	0.015956
		0.203333	-0.07111	-0.11407	-0.08498	-0.02207	0.019844
		0.206667	-0.07445	-0.1177	-0.0819	-0.01919	0.01529
		0.21	-0.07288	-0.11289	-0.08466	-0.0241	0.020567
		0.213333	-0.07057	-0.11623	-0.08204	-0.02658	0.01899
		0.216667	-0.07349	-0.11013	-0.08314	-0.02448	0.018688
		0.22	-0.07604	-0.11293	-0.08301	-0.02483	0.017572
		0.223333	-0.07368	-0.10895	-0.08594	-0.02797	0.021159
		0.226667	-0.07387	-0.11358	-0.08158	-0.02212	0.016741
		0.23	-0.07185	-0.11254	-0.08631	-0.02605	0.020457
		0.233333	-0.07892	-0.11444	-0.08102	-0.02282	0.017971
		0.236667	-0.0737	-0.11265	-0.08747	-0.02007	0.018508
		0.24	-0.07441	-0.10906	-0.07745	-0.02076	0.018995
		0.243333	-0.07534	-0.11274	-0.08188	-0.02112	0.015231
		0.246667	-0.07037	-0.11306	-0.08526	-0.02326	0.01474
		0.25	-0.07745	-0.11489	-0.08567	-0.02634	0.018217
		0.253333	-0.07374	-0.10888	-0.08118	-0.02327	0.01741
		0.256667	-0.07605	-0.11114	-0.08384	-0.01944	0.016493
		0.26	-0.07025	-0.11036	-0.08416	-0.02598	0.017354
		0.263333	-0.0769	-0.10916	-0.08467	-0.01894	0.023266
		0.266667	-0.07635	-0.11185	-0.08169	-0.02187	0.020583
		0.27	-0.07461	-0.11526	-0.08659	-0.02548	0.021537
		0.273333	-0.07714	-0.11424	-0.08296	-0.024	0.019971
		0.276667	-0.0752	-0.11	-0.08106	-0.02354	0.018399
		0.28	-0.07424	-0.11281	-0.08088	-0.02259	0.021444
		0.283333	-0.07776	-0.11259	-0.08154	-0.0259	0.018133
		0.286667	-0.07129	-0.11536	-0.0805	-0.02134	0.021862
		0.29	-0.07627	-0.10771	-0.07718	-0.02328	0.016494
		0.293333	-0.07485	-0.11189	-0.08299	-0.02242	0.018693
		0.296667	-0.0791	-0.1131	-0.08284	-0.0241	0.022023
		0.3	-0.07784	-0.11284	-0.08469	-0.02482	0.019555
		0.303333	-0.07239	-0.11305	-0.08416	-0.02239	0.019315
		0.306667	-0.07552	-0.11054	-0.07586	-0.02709	0.014963
		0.31	-0.07351	-0.11348	-0.08527	-0.02551	0.018537
		0.313333	-0.07319	-0.11248	-0.07874	-0.02305	0.016771
		0.316667	-0.07461	-0.10953	-0.08115	-0.02798	0.018297
		0.32	-0.0779	-0.11244	-0.07993	-0.02164	0.020769
		0.323333	-0.0772	-0.11353	-0.08027	-0.01901	0.017622
		0.326667	-0.08042	-0.11312	-0.08546	-0.02127	0.015797
		0.33	-0.07845	-0.11168	-0.08105	-0.02051	0.017863
		0.333333	-0.07011	-0.11331	-0.08529	-0.02051	0.022456
		0.336667	-0.06913	-0.11158	-0.08218	-0.02497	0.020124
		0.34	-0.07572	-0.11696	-0.0851	-0.01921	0.017676
		0.343333	-0.07171	-0.1134	-0.08335	-0.02429	0.017001
		0.346667	-0.08214	-0.11333	-0.07773	-0.02603	0.016451
		0.35	-0.079	-0.11648	-0.08269	-0.02156	0.01811
		0.353333	-0.07537	-0.10802	-0.08123	-0.02189	0.021749
		0.356667	-0.07453	-0.1158	-0.08334	-0.02226	0.019976
		0.36	-0.07371	-0.10645	-0.07832	-0.02482	0.020931
		0.363333	-0.07355	-0.11703	-0.08304	-0.01986	0.016863
		0.366667	-0.07482	-0.11315	-0.0795	-0.02471	0.021122
		0.37	-0.07523	-0.11098	-0.08203	-0.02284	0.017666
		0.373333	-0.077	-0.11506	-0.08196	-0.02311	0.016221
		0.376667	-0.07461	-0.11017	-0.08439	-0.02265	0.021541
		0.38	-0.07662	-0.11046	-0.07955	-0.02554	0.018212
		0.383333	-0.07484	-0.11133	-0.08359	-0.02354	0.020633
		0.386667	-0.07556	-0.11498	-0.08542	-0.02651	0.02034
		0.39	-0.07112	-0.11676	-0.08488	-0.02439	0.014805
		0.393333	-0.07662	-0.11187	-0.08339	-0.02113	0.019688
		0.396667	-0.07379	-0.1157	-0.08257	-0.01817	0.019633
		0.4	-0.07313	-0.11038	-0.08294	-0.02168	0.013565
		0.403333	-0.07782	-0.10874	-0.0805	-0.02468	0.020525
		0.406667	-0.07749	-0.10942	-0.08015	-0.01962	0.019399
		0.41	-0.0761	-0.1137	-0.08057	-0.02391	0.023041
		0.413333	-0.07435	-0.111	-0.08579	-0.02377	0.019319
		0.416667	-0.07648	-0.11343	-0.07957	-0.02237	0.021351
		0.42	-0.07693	-0.11433	-0.07973	-0.02326	0.015959
		0.423333	-0.07499	-0.11081	-0.08326	-0.02455	0.017831
		0.426667	-0.07602	-0.11022	-0.08387	-0.02307	0.015162
		0.43	-0.0741	-0.11164	-0.08516	-0.02828	0.019131
		0.433333	-0.07979	-0.11437	-0.08574	-0.02595	0.01585
		0.436667	-0.07816	-0.11068	-0.0851	-0.02221	0.016314
		0.44	-0.07835	-0.11123	-0.08456	-0.02674	0.019198
		0.443333	-0.07608	-0.10981	-0.08191	-0.027	0.017017
		0.446667	-0.07504	-0.11089	-0.08258	-0.02229	0.015625
		0.45	-0.07644	-0.10969	-0.08103	-0.01709	0.012527
		0.453333	-0.07511	-0.11346	-0.07937	-0.02362	0.017162
		0.456667	-0.0729	-0.11283	-0.07817	-0.02778	0.017715
		0.46	-0.07862	-0.10966	-0.08513	-0.02615	0.016519
		0.463333	-0.07717	-0.10979	-0.08345	-0.01925	0.015363
		0.466667	-0.0781	-0.11308	-0.08039	-0.01951	0.017248
		0.47	-0.07488	-0.11637	-0.08512	-0.02216	0.018968
		0.473333	-0.07712	-0.11182	-0.08341	-0.02487	0.017151
		0.476667	-0.07649	-0.11194	-0.08315	-0.01988	0.01522
		0.48	-0.07465	-0.11029	-0.07893	-0.0158	0.018718
		0.483333	-0.07806	-0.11411	-0.07893	-0.02184	0.018717
		0.486667	-0.0755	-0.11008	-0.08367	-0.02278	0.018604
		0.49	-0.07772	-0.11428	-0.08574	-0.02201	0.019439
		0.493333	-0.07432	-0.11272	-0.08463	-0.02444	0.020774
		0.496667	-0.07823	-0.10916	-0.08116	-0.02507	0.014412
		0.5	-0.07627	-0.11467	-0.07777	-0.02266	0.017489
		0.503333	-0.076	-0.10966	-0.08077	-0.02763	0.017751
		0.506667	-0.07834	-0.10892	-0.08004	-0.0248	0.017508
		0.51	-0.07974	-0.11455	-0.08188	-0.02275	0.0155
		0.513333	-0.07876	-0.11837	-0.08009	-0.02601	0.014857
		0.516667	-0.07368	-0.10954	-0.08121	-0.02556	0.016023
		0.52	-0.07624	-0.11546	-0.08343	-0.02333	0.014696
		0.523333	-0.07443	-0.10955	-0.08105	-0.02358	0.019147
		0.526667	-0.07693	-0.10949	-0.0797	-0.02493	0.019863
		0.53	-0.07364	-0.11036	-0.08619	-0.02174	0.016343
		0.533333	-0.07509	-0.11379	-0.08007	-0.0262	0.016943
		0.536667	-0.07775	-0.10837	-0.08111	-0.02667	0.015606
		0.54	-0.07882	-0.11012	-0.07815	-0.02402	0.013609
		0.543333	-0.07702	-0.11275	-0.0864	-0.02305	0.019689
		0.546667	-0.07594	-0.11235	-0.08355	-0.02926	0.016811
		0.55	-0.07915	-0.11186	-0.08119	-0.02564	0.01872
		0.553333	-0.07369	-0.10712	-0.0817	-0.02404	0.020969
		0.556667	-0.07435	-0.11499	-0.08351	-0.02361	0.013517
		0.56	-0.07739	-0.11089	-0.0799	-0.02846	0.015364
		0.563333	-0.07858	-0.11788	-0.08295	-0.0238	0.015023
		0.566667	-0.07714	-0.11181	-0.0826	-0.02331	0.015447
		0.57	-0.08029	-0.11503	-0.08181	-0.02632	0.016348
		0.573333	-0.0802	-0.1136	-0.08092	-0.02298	0.015739
		0.576667	-0.07498	-0.1134	-0.08343	-0.02378	0.018758
		0.58	-0.07722	-0.11596	-0.07905	-0.0268	0.016902
		0.583333	-0.07722	-0.11169	-0.08015	-0.02066	0.015254
		0.586667	-0.07607	-0.11113	-0.0801	-0.02666	0.016141
		0.59	-0.07541	-0.11097	-0.08597	-0.02838	0.016208
		0.593333	-0.07616	-0.1138	-0.08265	-0.02607	0.015547
		0.596667	-0.07613	-0.1119	-0.08237	-0.02207	0.016599
		0.6	-0.07432	-0.11484	-0.08194	-0.02752	0.013339
		0.603333	-0.07694	-0.11403	-0.08213	-0.02167	0.012762
		0.606667	-0.0797	-0.11294	-0.08041	-0.0241	0.018943
		0.61	-0.07913	-0.10914	-0.08264	-0.02171	0.014601
		0.613333	-0.07339	-0.1092	-0.08324	-0.0225	0.018632
		0.616667	-0.07508	-0.11326	-0.0802	-0.02347	0.016639
		0.62	-0.07722	-0.11202	-0.08149	-0.02784	0.016277
		0.623333	-0.07735	-0.10948	-0.08153	-0.02294	0.019347
		0.626667	-0.07553	-0.11072	-0.08035	-0.0239	0.017505
		0.63	-0.07349	-0.11194	-0.07957	-0.02417	0.014518
		0.633333	-0.07721	-0.11463	-0.07796	-0.02317	0.016163
		0.636667	-0.07364	-0.11013	-0.07966	-0.02536	0.016858
		0.64	-0.07752	-0.11206	-0.08333	-0.02408	0.016349
		0.643333	-0.07635	-0.11456	-0.08164	-0.02151	0.020031
		0.646667	-0.08043	-0.11188	-0.08287	-0.02499	0.016549
		0.65	-0.07549	-0.11879	-0.08437	-0.02854	0.012281
		0.653333	-0.07529	-0.11319	-0.08075	-0.02569	0.015116
		0.656667	-0.07416	-0.10981	-0.07868	-0.02433	0.016486
		0.66	-0.07342	-0.10928	-0.07729	-0.02514	0.020373
		0.663333	-0.07653	-0.11078	-0.07738	-0.02677	0.012764
		0.666667	-0.08024	-0.112	-0.0863	-0.02253	0.015128
		0.67	-0.07553	-0.11162	-0.08115	-0.02271	0.018104
		0.673333	-0.07635	-0.10905	-0.07833	-0.02752	0.016398
		0.676667	-0.07961	-0.11096	-0.07928	-0.02365	0.020502
		0.68	-0.07469	-0.11257	-0.07756	-0.02442	0.01635
		0.683333	-0.0739	-0.11425	-0.08346	-0.0246	0.017261
		0.686667	-0.07775	-0.11152	-0.08494	-0.02287	0.016737
		0.69	-0.07669	-0.11068	-0.08237	-0.02933	0.013981
		0.693333	-0.07613	-0.1117	-0.08074	-0.02576	0.014913
		0.696667	-0.07447	-0.11115	-0.07871	-0.0218	0.017973
		0.7	-0.07487	-0.11321	-0.07989	-0.02665	0.017017
		0.703333	-0.07784	-0.11432	-0.08287	-0.02313	0.015748
		0.706667	-0.0738	-0.10857	-0.08053	-0.02167	0.012539
		0.71	-0.07485	-0.11787	-0.07999	-0.02416	0.016786
		0.713333	-0.07752	-0.11175	-0.08283	-0.02349	0.019674
		0.716667	-0.07765	-0.11472	-0.08063	-0.02458	0.017309
		0.72	-0.07982	-0.11662	-0.08382	-0.02699	0.015197
		0.723333	-0.07226	-0.11334	-0.08362	-0.02865	0.019691
		0.726667	-0.07663	-0.11224	-0.08229	-0.02641	0.017026
		0.73	-0.08	-0.11657	-0.0785	-0.02574	0.017298
		0.733333	-0.07716	-0.11365	-0.08281	-0.02642	0.016432
		0.736667	-0.07323	-0.11492	-0.08358	-0.02751	0.015409
		0.74	-0.07705	-0.11227	-0.08271	-0.02601	0.017673
		0.743333	-0.07603	-0.11346	-0.07963	-0.02601	0.017497
		0.746667	-0.07704	-0.11132	-0.0808	-0.02613	0.01115
		0.75	-0.08179	-0.11792	-0.08075	-0.02462	0.019872
		0.753333	-0.07484	-0.11203	-0.082	-0.02778	0.012753
		0.756667	-0.07633	-0.11172	-0.08044	-0.02763	0.007138
		0.76	-0.07649	-0.10963	-0.07888	-0.02503	0.016236
		0.763333	-0.07765	-0.11503	-0.08342	-0.02519	0.01603
		0.766667	-0.07508	-0.11618	-0.08133	-0.02549	0.014497
		0.77	-0.07607	-0.11357	-0.07818	-0.02557	0.021126
		0.773333	-0.07749	-0.11138	-0.08163	-0.025	0.014047
		0.776667	-0.07258	-0.11009	-0.08073	-0.02421	0.016403
		0.78	-0.0807	-0.11178	-0.08079	-0.02693	0.014478
		0.783333	-0.07977	-0.11049	-0.08209	-0.02809	0.013767
		0.786667	-0.07839	-0.11282	-0.08188	-0.03074	0.017176
		0.79	-0.0736	-0.11037	-0.08024	-0.02685	0.017316
		0.793333	-0.07567	-0.11285	-0.08345	-0.02476	0.012107
		0.796667	-0.07247	-0.11058	-0.08364	-0.02716	0.014095
		0.8	-0.08155	-0.11378	-0.08165	-0.02226	0.01585
		0.803333	-0.077	-0.11554	-0.08133	-0.02497	0.013896
		0.806667	-0.07775	-0.10975	-0.08021	-0.03031	0.016223
		0.81	-0.07643	-0.11185	-0.08055	-0.03093	0.013002
		0.813333	-0.07477	-0.1113	-0.08404	-0.02612	0.016621
		0.816667	-0.07745	-0.11076	-0.08131	-0.02629	0.013627
		0.82	-0.07788	-0.11775	-0.08019	-0.02753	0.012778
		0.823333	-0.07612	-0.10982	-0.08589	-0.02364	0.01742
		0.826667	-0.07619	-0.10971	-0.07955	-0.02889	0.01346
		0.83	-0.07959	-0.11321	-0.0824	-0.02713	0.012009
		0.833333	-0.07841	-0.11165	-0.08144	-0.02527	0.020986
		0.836667	-0.08001	-0.11483	-0.08324	-0.02987	0.018454
		0.84	-0.07491	-0.10914	-0.07999	-0.02984	0.01194
		0.843333	-0.07876	-0.11364	-0.08483	-0.02582	0.01745
		0.846667	-0.07693	-0.11508	-0.08429	-0.02887	0.013162
		0.85	-0.07734	-0.1164	-0.08399	-0.03121	0.017297
		0.853333	-0.0776	-0.11304	-0.07754	-0.02974	0.013544
		0.856667	-0.07564	-0.11267	-0.08215	-0.02335	0.017528
		0.86	-0.07943	-0.11444	-0.0828	-0.0276	0.012798
		0.863333	-0.07809	-0.11449	-0.08375	-0.02888	0.010692
		0.866667	-0.08193	-0.11326	-0.08055	-0.02118	0.016269
		0.87	-0.07527	-0.1126	-0.07898	-0.03098	0.010935
		0.873333	-0.07624	-0.11038	-0.08115	-0.03111	0.017018
		0.876667	-0.07965	-0.11224	-0.0834	-0.02701	0.019323
		0.88	-0.07598	-0.11554	-0.08278	-0.02645	0.011244
		0.883333	-0.08193	-0.11401	-0.079	-0.02823	0.015847
		0.886667	-0.07846	-0.11629	-0.08571	-0.02558	0.011237
		0.89	-0.08071	-0.11711	-0.08348	-0.02594	0.019895
		0.893333	-0.07964	-0.11513	-0.08262	-0.0237	0.017213
		0.896667	-0.0769	-0.11056	-0.08336	-0.02295	0.018662
		0.9	-0.08121	-0.11185	-0.0774	-0.02851	0.015077
		0.903333	-0.07476	-0.11396	-0.08104	-0.02797	0.013107
		0.906667	-0.08243	-0.10862	-0.08136	-0.02385	0.013289
		0.91	-0.07628	-0.10988	-0.0805	-0.02811	0.015475
		0.913333	-0.07902	-0.11089	-0.0767	-0.02879	0.011759
		0.916667	-0.07852	-0.11136	-0.08668	-0.02613	0.015745
		0.92	-0.07894	-0.11156	-0.07766	-0.02307	0.014228
		0.923333	-0.08641	-0.10644	-0.07728	-0.02973	0.017716
		0.926667	-0.07652	-0.11306	-0.08461	-0.02648	0.018049
		0.93	-0.08165	-0.10655	-0.08083	-0.02825	0.015266
		0.933333	-0.07734	-0.11427	-0.07999	-0.0239	0.013686
		0.936667	-0.07774	-0.11405	-0.08095	-0.03166	0.015924
		0.94	-0.08	-0.1137	-0.08301	-0.02464	0.01787
		0.943333	-0.07581	-0.10766	-0.08115	-0.0268	0.016222
		0.946667	-0.07503	-0.11061	-0.08093	-0.03153	0.01351
		0.95	-0.07907	-0.11277	-0.08445	-0.02791	0.013503
		0.953333	-0.07721	-0.11448	-0.08404	-0.02771	0.013074
		0.956667	-0.07506	-0.11512	-0.08251	-0.03033	0.014849
		0.96	-0.07975	-0.11129	-0.08577	-0.02364	0.014758
		0.963333	-0.07854	-0.11509	-0.07901	-0.02383	0.012479
		0.966667	-0.08075	-0.11219	-0.08025	-0.02647	0.014737
		0.97	-0.07797	-0.10859	-0.08398	-0.02474	0.014399
		0.973333	-0.07547	-0.11557	-0.08433	-0.028	0.01448
		0.976667	-0.07938	-0.11382	-0.08305	-0.03244	0.014276
		0.98	-0.07927	-0.11049	-0.08196	-0.0285	0.013297
		0.983333	-0.07848	-0.11527	-0.07644	-0.03205	0.011578
		0.986667	-0.07699	-0.11475	-0.08086	-0.02876	0.015007
		0.99	-0.07417	-0.11761	-0.08094	-0.02747	0.015236
		0.993333	-0.07559	-0.11541	-0.07971	-0.02471	0.013304
		0.996667	-0.0786	-0.11247	-0.08318	-0.02821	0.013963
		1	0	0	0	0	0
		1.00333	0.028978	0.067508	0.036901	0.011011	0.002575
		1.00667	0.057672	0.129904	0.066324	0.022727	0.001662
		1.01	0.082399	0.183403	0.094214	0.038532	0.004559
		1.01333	0.122471	0.230628	0.12298	0.047496	0.004088
		1.01667	0.153755	0.275579	0.143695	0.067108	0.000574
		1.02	0.186721	0.318873	0.168471	0.07305	-0.00111
		1.02333	0.220352	0.357121	0.192442	0.085854	0.004143
		1.02667	0.248712	0.387466	0.20887	0.10067	0.001502
		1.03	0.275312	0.420454	0.233257	0.10751	0.006563
		1.03333	0.304257	0.449329	0.2475	0.119743	-0.0002
		1.03667	0.33429	0.476258	0.262109	0.131814	0.008636
		1.04	0.366838	0.498517	0.281791	0.138859	0.006121
		1.04333	0.390392	0.526954	0.300809	0.149518	-0.00088
		1.04667	0.417205	0.552283	0.313073	0.158297	0.001099
		1.05	0.441295	0.569674	0.327715	0.17033	0.000561
		1.05333	0.467288	0.594242	0.342306	0.182855	0.001714
		1.05667	0.488528	0.608258	0.35741	0.183489	0.005752
		1.06	0.510981	0.621986	0.371591	0.198621	0.001594
		1.06333	0.532527	0.642717	0.381445	0.205414	-0.00011
		1.06667	0.558884	0.656427	0.391527	0.212624	0.003185
		1.07	0.575685	0.672477	0.404892	0.220581	2.67e-05
		1.07333	0.593062	0.680556	0.415318	0.228465	0.001917
		1.07667	0.61794	0.695212	0.430577	0.234183	0.00414
		1.08	0.631161	0.70583	0.438195	0.244608	-0.00017
		1.08333	0.645658	0.718327	0.446961	0.250956	-0.00113
		1.08667	0.66726	0.728482	0.45892	0.257466	0.000509
		1.09	0.681935	0.737546	0.465086	0.262224	-0.00088
		1.09333	0.698103	0.749576	0.476293	0.266677	-6.3e-05
		1.09667	0.708761	0.758449	0.482938	0.272569	-0.0024
		1.1	0.726421	0.771377	0.497014	0.281143	-0.00088
		1.10333	0.734992	0.776705	0.499884	0.286298	-0.00055
		1.10667	0.751552	0.782785	0.509879	0.289332	0.002997
		1.11	0.761663	0.793734	0.518513	0.299842	0.001822
		1.11333	0.776452	0.802815	0.525624	0.298501	-0.00038
		1.11667	0.786409	0.808182	0.531444	0.307545	0.00135
		1.12	0.795383	0.815886	0.534292	0.310564	0.006492
		1.12333	0.809903	0.817784	0.546364	0.318325	0.001578
		1.12667	0.818708	0.827951	0.553816	0.316432	-0.00169
		1.13	0.829136	0.835591	0.560465	0.32643	-0.00072
		1.13333	0.839328	0.838105	0.565492	0.332193	-0.00211
		1.13667	0.851113	0.844763	0.572262	0.337229	0.001547
		1.14	0.857144	0.850921	0.575997	0.338498	-0.00166
		1.14333	0.870678	0.853076	0.587189	0.339323	0.000195
		1.14667	0.876777	0.863378	0.587318	0.349535	-0.00054
		1.15	0.878193	0.86921	0.596901	0.34418	0.004027
		1.15333	0.890829	0.878595	0.598154	0.352149	0.002588
		1.15667	0.902338	0.88047	0.605037	0.357077	0.001637
		1.16	0.909472	0.883721	0.611346	0.364455	-0.00193
		1.16333	0.914486	0.886659	0.612219	0.362995	0.000217
		1.16667	0.925458	0.896793	0.616022	0.368192	0.00095
		1.17	0.924536	0.897113	0.627524	0.367501	0.001005
		1.17333	0.937595	0.902068	0.627731	0.375822	-0.00577
		1.17667	0.941456	0.90619	0.63506	0.375632	-0.00304
		1.18	0.946723	0.909573	0.639688	0.37695	0.00161
		1.18333	0.955695	0.912752	0.642273	0.386769	-0.00136
		1.18667	0.95808	0.916418	0.652138	0.386052	-0.00084
		1.19	0.964811	0.926011	0.658387	0.388476	-0.00592
		1.19333	0.969151	0.931097	0.656758	0.393693	0.003069
		1.19667	0.976825	0.931138	0.659159	0.396959	-0.00436
		1.2	0.984592	0.929922	0.662951	0.397883	-0.00083
		1.20333	0.986613	0.936968	0.671935	0.399582	0.002746
		1.20667	0.994088	0.938666	0.670477	0.399682	-0.00179
		1.21	0.997002	0.949583	0.674054	0.403714	0.000701
		1.21333	1.00618	0.947448	0.679472	0.407294	0.003256
		1.21667	1.00677	0.949276	0.679584	0.409777	-0.00435
		1.22	1.01316	0.954602	0.690434	0.413352	0.001211
		1.22333	1.0182	0.955943	0.68926	0.415254	-0.00318
		1.22667	1.02207	0.958214	0.696477	0.416053	-0.00257
		1.23	1.02316	0.958363	0.697946	0.418006	-0.00165
		1.23333	1.02665	0.967134	0.700716	0.420061	-0.00027
		1.23667	1.03654	0.965836	0.706797	0.42226	-0.001
		1.24	1.03906	0.968035	0.705884	0.423889	0.001666
		1.24333	1.03542	0.975487	0.708048	0.426439	0.000651
		1.24667	1.04713	0.973776	0.714759	0.430958	-0.0021
		1.25	1.05457	0.974321	0.716555	0.428033	-0.00205
		1.25333	1.05261	0.98345	0.719456	0.433826	0.001355
		1.25667	1.05891	0.982031	0.722554	0.433442	-0.0016
		1.26	1.06544	0.988737	0.721193	0.438158	9.67e-05
		1.26333	1.06265	0.989285	0.73236	0.438278	2.02e-05
		1.26667	1.06798	0.989129	0.733187	0.441704	0.002196
		1.27	1.06861	0.993312	0.73436	0.4418	0.000321
		1.27333	1.07515	0.997067	0.736881	0.443373	-0.001
		1.27667	1.08024	0.996397	0.739564	0.447378	0.002086
		1.28	1.08258	0.999531	0.742503	0.444884	-0.00048
		1.28333	1.08762	1.00513	0.744874	0.451664	-0.00207
		1.28667	1.08836	1.00568	0.745027	0.452612	0.000747
		1.29	1.09172	1.00416	0.74982	0.451045	0.002712
		1.29333	1.09574	1.00954	0.752005	0.453569	-0.00199
		1.29667	1.09728	1.00926	0.75685	0.450736	-0.00273
		1.3	1.10019	1.01459	0.761183	0.455388	0.000812
		1.30333	1.10377	1.0195	0.757116	0.461296	0.000998
		1.30667	1.10372	1.01834	0.766531	0.461499	-0.00101
		1.31	1.10716	1.02081	0.767978	0.462591	0.001918
		1.31333	1.11133	1.02007	0.771612	0.463434	-0.0037
		1.31667	1.11459	1.02852	0.769708	0.465549	0.002887
		1.32	1.11914	1.02552	0.775341	0.466836	0.00264
		1.32333	1.12078	1.0292	0.776706	0.464444	0.000136
		1.32667	1.12582	1.02946	0.781045	0.468888	-0.00184
		1.33	1.12239	1.031	0.780616	0.473249	-0.00011
		1.33333	1.13203	1.03414	0.783143	0.470505	0.000129
		1.33667	1.13066	1.03268	0.785675	0.470518	-0.00091
		1.34	1.13811	1.03973	0.784576	0.474318	-0.00271
		1.34333	1.13284	1.04153	0.786213	0.476426	-0.00043
		1.34667	1.14046	1.04195	0.793966	0.47668	-0.00065
		1.35	1.13849	1.04784	0.795898	0.476464	-0.00032
		1.35333	1.14817	1.04775	0.800025	0.479614	0.000455
		1.35667	1.14392	1.04633	0.793757	0.478061	0.00179
		1.36	1.14637	1.04831	0.797803	0.483034	-0.00163
		1.36333	1.14703	1.05132	0.800389	0.483904	-0.00105
		1.36667	1.15595	1.04921	0.804808	0.485091	0.003067
		1.37	1.15183	1.05102	0.805856	0.488649	0.000709
		1.37333	1.15587	1.0565	0.806159	0.48373	0.001155
		1.37667	1.15964	1.05351	0.808068	0.489168	-0.00278
		1.38	1.16208	1.05963	0.814936	0.49029	-0.0034
		1.38333	1.15957	1.05934	0.816604	0.492636	0.000665
		1.38667	1.16569	1.06112	0.81878	0.489348	0.000905
		1.39	1.16946	1.06362	0.815666	0.496597	-0.00554
		1.39333	1.16855	1.06209	0.815345	0.492693	-2.7e-05
		1.39667	1.16963	1.0645	0.821422	0.496877	-0.00169
		1.4	1.17142	1.06726	0.822886	0.49192	-4.1e-05
		1.40333	1.17245	1.06822	0.822231	0.499203	-0.0011
		1.40667	1.17263	1.07005	0.825138	0.494404	0.000875
		1.41	1.17544	1.07197	0.828842	0.501555	-0.00199
		1.41333	1.18299	1.07192	0.833477	0.499474	-0.00344
		1.41667	1.18347	1.07509	0.829151	0.49915	-0.00047
		1.42	1.18664	1.07578	0.83275	0.50533	0.000897
		1.42333	1.18723	1.07695	0.831807	0.499981	2.84e-05
		1.42667	1.18308	1.08184	0.840134	0.503985	-0.00483
		1.43	1.19437	1.0786	0.833428	0.504531	-0.00115
		1.43333	1.1905	1.08415	0.844592	0.505696	-0.00153
		1.43667	1.19054	1.08642	0.845375	0.505151	-0.00048
		1.44	1.19232	1.08336	0.844435	0.505602	-0.00258
		1.44333	1.2004	1.08818	0.844119	0.507648	0.00037
		1.44667	1.19746	1.08557	0.848706	0.51076	-0.00318
		1.45	1.19951	1.0897	0.846766	0.509901	-0.00205
		1.45333	1.20087	1.08944	0.847481	0.510571	-0.00031
		1.45667	1.20743	1.09066	0.851305	0.510104	-0.00082
		1.46	1.20737	1.09201	0.85222	0.511237	-0.00221
		1.46333	1.2063	1.08897	0.851859	0.51168	-0.00093
		1.46667	1.20506	1.09908	0.853267	0.517404	-0.00209
		1.47	1.21027	1.09814	0.857488	0.516335	-0.00556
		1.47333	1.2148	1.09631	0.856312	0.51469	-0.00117
		1.47667	1.21693	1.09583	0.861385	0.514177	-0.00558
		1.48	1.21537	1.09873	0.866825	0.519185	-0.00231
		1.48333	1.21811	1.10154	0.86	0.521281	0.000353
		1.48667	1.21639	1.10542	0.865619	0.517548	-0.00357
		1.49	1.21693	1.09935	0.870086	0.51682	-0.00232
		1.49333	1.21931	1.10526	0.86965	0.518489	-0.00362
		1.49667	1.22364	1.10291	0.867531	0.51913	-0.00656
		1.5	1.22249	1.11253	0.872166	0.520432	-0.00265
		1.50333	1.22799	1.10715	0.874351	0.525066	-0.00317
		1.50667	1.22569	1.10882	0.876268	0.522131	-0.00506
		1.51	1.22711	1.11397	0.874583	0.524491	-0.00168
		1.51333	1.22989	1.11048	0.873217	0.523935	-0.00343
		1.51667	1.23252	1.11275	0.877257	0.52884	-0.00057
		1.52	1.22846	1.11502	0.880233	0.525792	-0.00264
		1.52333	1.23653	1.12043	0.884519	0.524798	-0.00584
		1.52667	1.23887	1.1152	0.876511	0.527184	-0.0006
		1.53	1.24401	1.11907	0.885678	0.526573	-0.00381
		1.53333	1.24092	1.12303	0.887453	0.527573	-0.00029
		1.53667	1.24144	1.12112	0.884854	0.531831	-0.00365
		1.54	1.24256	1.12461	0.891557	0.534293	-0.00248
		1.54333	1.24058	1.12172	0.892098	0.53001	-0.00303
		1.54667	1.24245	1.12126	0.889327	0.534515	-0.00234
		1.55	1.24438	1.12304	0.891209	0.532751	-0.00087
		1.55333	1.24987	1.12396	0.890525	0.538621	-0.00786
		1.55667	1.24453	1.12817	0.892452	0.533318	-0.00407
		1.56	1.24677	1.1238	0.895393	0.529082	-0.00131
		1.56333	1.24588	1.12655	0.898889	0.53323	-0.00092
		1.56667	1.25524	1.12991	0.894411	0.535946	-0.00064
		1.57	1.25253	1.13355	0.89841	0.538084	-0.00422
		1.57333	1.25785	1.12961	0.899867	0.536784	-0.00323
		1.57667	1.25707	1.12996	0.901939	0.540514	-0.00052
		1.58	1.25411	1.13307	0.904401	0.541614	-0.00459
		1.58333	1.25587	1.13529	0.904528	0.53618	0.000324
		1.58667	1.2568	1.13601	0.900597	0.541883	-0.00294
		1.59	1.2562	1.13597	0.900395	0.54171	-6.9e-06
		1.59333	1.26325	1.13782	0.910955	0.546147	-0.00417
		1.59667	1.26257	1.13712	0.906785	0.544897	0.000648
		1.6	1.26351	1.1378	0.90684	0.540443	-0.00203
		1.60333	1.25841	1.14098	0.910269	0.544249	0.004416
		1.60667	1.26774	1.13744	0.910513	0.54426	-0.00424
		1.61	1.26999	1.13993	0.912874	0.540659	0.000861
		1.61333	1.27004	1.14326	0.914518	0.544806	-0.00494
		1.61667	1.27434	1.14251	0.914694	0.548805	-0.00472
		1.62	1.271	1.14719	0.914773	0.544217	-0.00398
		1.62333	1.27157	1.14288	0.915424	0.548009	-0.0042
		1.62667	1.27747	1.14627	0.919775	0.550361	-0.00494
		1.63	1.27743	1.15076	0.915929	0.551263	-0.00098
		1.63333	1.27759	1.15125	0.915203	0.551541	-0.00135
		1.63667	1.2822	1.14816	0.918955	0.55254	-0.00176
		1.64	1.28074	1.1513	0.922893	0.550391	-0.00483
		1.64333	1.28042	1.15351	0.92359	0.551621	-0.00177
		1.64667	1.28055	1.14737	0.919984	0.552175	0.001955
		1.65	1.27958	1.15297	0.922966	0.551291	-0.0018
		1.65333	1.2834	1.15325	0.923544	0.550609	-0.00097
		1.65667	1.28309	1.15701	0.927809	0.550372	-0.00094
		1.66	1.29086	1.15868	0.930754	0.55655	-0.00233
		1.66333	1.28606	1.15488	0.928134	0.556423	-0.00474
		1.66667	1.28844	1.15943	0.930888	0.550775	-0.003
		1.67	1.29384	1.15306	0.931665	0.557835	-0.00589
		1.67333	1.29001	1.16002	0.930374	0.5542	-0.00275
		1.67667	1.29146	1.15606	0.930726	0.556252	-0.00471
		1.68	1.29208	1.16443	0.93505	0.556849	-0.00283
		1.68333	1.2935	1.16143	0.937953	0.556053	-0.00235
		1.68667	1.2906	1.16525	0.938203	0.556329	-0.00325
		1.69	1.29875	1.16469	0.941435	0.55758	-0.00605
		1.69333	1.29927	1.16103	0.937996	0.559794	-0.00106
		1.69667	1.29929	1.16357	0.939847	0.561311	-0.00405
		1.7	1.30234	1.16224	0.940957	0.558633	-0.00208
		1.70333	1.30047	1.16328	0.938679	0.563027	-0.00384
		1.70667	1.30059	1.17065	0.942987	0.564884	-0.00139
		1.71	1.30237	1.16756	0.9422	0.566161	-0.00433
		1.71333	1.30061	1.17008	0.947092	0.560969	-0.00457
		1.71667	1.3018	1.16955	0.942923	0.562748	-0.00497
		1.72	1.30306	1.16999	0.94618	0.558157	-0.0012
		1.72333	1.30803	1.16706	0.946527	0.564124	-0.00708
		1.72667	1.30468	1.17046	0.947794	0.569421	-0.00059
		1.73	1.30512	1.17159	0.951523	0.563352	-0.0042
		1.73333	1.30926	1.17514	0.94649	0.565861	-0.00482
		1.73667	1.30467	1.17621	0.944955	0.567881	-0.00219
		1.74	1.31262	1.17545	0.956379	0.565447	-0.00069
		1.74333	1.31562	1.17231	0.94974	0.564008	-0.00422
		1.74667	1.31075	1.18023	0.957232	0.563202	-0.00452
		1.75	1.3123	1.17359	0.957072	0.569905	-0.00386
		1.75333	1.31463	1.17591	0.954317	0.568998	-0.00499
		1.75667	1.31805	1.18377	0.955172	0.56765	-0.00697
		1.76	1.31493	1.1765	0.956868	0.56739	-0.00333
		1.76333	1.3161	1.17845	0.957421	0.568623	0.003261
		1.76667	1.31634	1.17886	0.956798	0.567719	-0.00328
		1.77	1.31979	1.18655	0.959887	0.567032	-0.0031
		1.77333	1.3218	1.18182	0.962963	0.567243	-0.00233
		1.77667	1.31965	1.17931	0.959616	0.568384	-0.00596
		1.78	1.32602	1.18593	0.960452	0.569352	-0.00531
		1.78333	1.32296	1.1843	0.963831	0.569835	-0.00331
		1.78667	1.32786	1.18315	0.963164	0.571709	-0.00057
		1.79	1.32416	1.18587	0.964613	0.569976	-0.00339
		1.79333	1.32896	1.18511	0.967923	0.570321	-0.00264
		1.79667	1.32391	1.18103	0.965622	0.572431	-0.00325
		1.8	1.32397	1.18891	0.967638	0.574593	-0.00536
		1.80333	1.32635	1.19041	0.970649	0.571187	-0.00382
		1.80667	1.32849	1.19006	0.969263	0.576627	-0.00474
		1.81	1.33091	1.19316	0.971165	0.577906	-0.00681
		1.81333	1.33094	1.18893	0.969483	0.573355	-0.00178
		1.81667	1.33512	1.19468	0.971565	0.579314	-0.00364
		1.82	1.33693	1.18828	0.968626	0.575665	-0.00637
		1.82333	1.33662	1.19254	0.974296	0.576414	-0.00277
		1.82667	1.33211	1.19511	0.97373	0.58279	-0.005
		1.83	1.33941	1.19633	0.969943	0.578113	-0.00484
		1.83333	1.33721	1.19847	0.970466	0.57472	-0.00411
		1.83667	1.34261	1.1963	0.976356	0.579444	-0.00433
		1.84	1.33888	1.19341	0.978596	0.580047	0.000121
		1.84333	1.34243	1.19759	0.976019	0.577529	-0.00303
		1.84667	1.3393	1.19736	0.973655	0.581247	0.002812
		1.85	1.34638	1.19767	0.982341	0.576749	-0.00535
		1.85333	1.34774	1.19945	0.97887	0.580419	-0.00403
		1.85667	1.34593	1.1994	0.984395	0.583324	-0.0052
		1.86	1.34321	1.1997	0.981047	0.576681	-0.0088
		1.86333	1.3447	1.19786	0.989899	0.583392	-0.00324
		1.86667	1.34574	1.20321	0.984847	0.582821	-0.00279
		1.87	1.34631	1.20006	0.984713	0.585226	-0.00025
		1.87333	1.34302	1.2033	0.980708	0.583746	-0.00411
		1.87667	1.34925	1.20207	0.983324	0.585029	-0.00317
		1.88	1.35087	1.20487	0.990808	0.586736	-0.00268
		1.88333	1.35068	1.20249	0.985232	0.586821	-0.00378
		1.88667	1.35367	1.21243	0.990097	0.586275	-0.00549
		1.89	1.35285	1.20809	0.988055	0.584866	-0.00395
		1.89333	1.3529	1.20485	0.990758	0.579669	-0.00451
		1.89667	1.35105	1.20727	0.991311	0.583919	-0.00079
		1.9	1.35499	1.21044	0.988447	0.581532	-0.00297
		1.90333	1.35418	1.2093	0.992261	0.58989	-0.00723
		1.90667	1.35328	1.20745	0.998022	0.586396	-0.00766
		1.91	1.35739	1.21183	0.991577	0.58556	-0.00341
		1.91333	1.35645	1.21126	0.996486	0.591277	-0.00209
		1.91667	1.35769	1.20911	0.994652	0.588784	-0.00368
		1.92	1.35888	1.21122	0.998952	0.590584	-0.00481
		1.92333	1.35868	1.2122	0.996901	0.587105	-0.00037
		1.92667	1.35968	1.21026	0.996471	0.590726	-0.00268
		1.93	1.36151	1.21392	0.999656	0.588342	-0.00772
		1.93333	1.36034	1.21289	0.996366	0.588518	-0.00436
		1.93667	1.36544	1.2156	1.00028	0.588877	-0.00247
		1.94	1.36428	1.21471	1.00286	0.59468	-0.00124
		1.94333	1.36682	1.21364	1.00101	0.58862	-0.01017
		1.94667	1.36875	1.21399	1.00005	0.590124	-0.00638
		1.95	1.37135	1.21541	1.00135	0.592187	-0.00456
		1.95333	1.36728	1.21618	1.0049	0.590512	-0.00347
		1.95667	1.36193	1.21783	1.00765	0.592603	-0.00249
		1.96	1.37098	1.21899	1.00532	0.591533	-0.00487
		1.96333	1.37088	1.21716	1.00329	0.592338	-0.00929
		1.96667	1.3749	1.22166	1.00924	0.590576	-0.0066
		1.97	1.36714	1.21869	1.00884	0.594717	-0.00172
		1.97333	1.37018	1.21884	1.00884	0.592691	-0.00784
		1.97667	1.3762	1.2195	1.00708	0.593318	-0.00771
		1.98	1.37459	1.2237	1.00822	0.593122	-0.00106
		1.98333	1.37594	1.22396	1.00864	0.594269	-0.00117
		1.98667	1.37724	1.22091	1.0075	0.599189	-0.00256
		1.99	1.3768	1.22782	1.0085	0.594388	-0.00263
		1.99333	1.37522	1.22438	1.01253	0.593886	-0.00548
		1.99667	1.3782	1.2254	1.01189	0.597377	-0.00703
		2	1.37993	1.2264	1.01382	0.589528	-0.00263
		2.00333	1.38042	1.22456	1.0157	0.596316	-0.00239
		2.00667	1.3806	1.22927	1.01441	0.594228	-0.00549
		2.01	1.37969	1.23033	1.01538	0.599233	-0.00639
		2.01333	1.37807	1.22879	1.01324	0.601503	-0.00557
		2.01667	1.38768	1.22644	1.015	0.600472	-0.0061
		2.02	1.3831	1.22867	1.01749	0.598965	-0.00089
		2.02333	1.38641	1.2337	1.01699	0.594779	-0.00325
		2.02667	1.38695	1.22786	1.01921	0.599898	-0.00787
		2.03	1.38939	1.23443	1.01698	0.600098	-0.00155
		2.03333	1.38678	1.22961	1.01526	0.598197	-0.00582
		2.03667	1.38643	1.22883	1.02183	0.601037	-0.00404
		2.04	1.38502	1.23098	1.02441	0.601029	-0.00491
		2.04333	1.39271	1.23277	1.02142	0.600816	-0.00141
		2.04667	1.39344	1.23243	1.02495	0.599788	-0.00556
		2.05	1.39292	1.23381	1.02176	0.597331	-0.00516
		2.05333	1.39162	1.23284	1.02774	0.598496	-0.00756
		2.05667	1.39306	1.23598	1.02192	0.599675	-0.00226
		2.06	1.38896	1.23862	1.02523	0.607542	-0.00622
		2.06333	1.39066	1.24031	1.02261	0.604033	-0.00439
		2.06667	1.39836	1.23482	1.0309	0.602514	-0.00614
		2.07	1.39956	1.23718	1.02806	0.601321	-0.00684
		2.07333	1.40181	1.23905	1.02825	0.603939	-0.00513
		2.07667	1.3942	1.23569	1.027	0.605479	-0.00445
		2.08	1.39588	1.23617	1.02609	0.602404	-0.00408
		2.08333	1.39616	1.23958	1.02637	0.602555	-0.00561
		2.08667	1.3972	1.24153	1.02844	0.604173	-0.00832
		2.09	1.40139	1.23938	1.02699	0.602793	-0.0061
		2.09333	1.40441	1.24388	1.03352	0.602494	-0.0067
		2.09667	1.40114	1.24012	1.03225	0.605542	-0.00142
		2.1	1.40125	1.24383	1.0334	0.602306	-0.00402
		2.10333	1.39886	1.23784	1.03094	0.602911	-0.00324
		2.10667	1.40156	1.24236	1.03075	0.606407	-0.00567
		2.11	1.40425	1.24747	1.03629	0.607453	-0.0067
		2.11333	1.40621	1.24052	1.03449	0.607011	-0.00503
		2.11667	1.40322	1.24027	1.03777	0.607728	-0.00728
		2.12	1.40718	1.24096	1.03509	0.605811	-0.00964
		2.12333	1.40742	1.24239	1.03393	0.611723	-0.00419
		2.12667	1.40632	1.24544	1.03352	0.604647	-0.00633
		2.13	1.40566	1.24561	1.039	0.606212	-0.01044
		2.13333	1.40705	1.24822	1.03497	0.607369	-0.00638
		2.13667	1.40636	1.24829	1.03907	0.612736	-0.00923
		2.14	1.40784	1.2471	1.03619	0.610375	-0.00379
		2.14333	1.41368	1.24729	1.04132	0.603803	-0.00679
		2.14667	1.41197	1.24671	1.03917	0.607647	-0.0025
		2.15	1.41024	1.2496	1.0431	0.611285	-0.00754
		2.15333	1.41284	1.25365	1.0426	0.613016	-0.00547
		2.15667	1.41451	1.24497	1.03893	0.610867	-0.00337
		2.16	1.41127	1.24912	1.04476	0.61114	-0.00371
		2.16333	1.41386	1.25063	1.04669	0.612058	-0.00544
		2.16667	1.41051	1.24818	1.03947	0.609776	-0.00826
		2.17	1.41917	1.25163	1.03987	0.61175	-0.00461
		2.17333	1.41318	1.25414	1.0456	0.611498	-0.00714
		2.17667	1.4165	1.2516	1.04437	0.611451	-0.00764
		2.18	1.4095	1.25715	1.05	0.611843	-0.00646
		2.18333	1.42175	1.25223	1.04903	0.615225	-0.00791
		2.18667	1.42017	1.25381	1.04682	0.613314	-0.0022
		2.19	1.4222	1.25138	1.04367	0.614908	-0.00627
		2.19333	1.42075	1.25598	1.05005	0.611045	-0.00512
		2.19667	1.42225	1.25631	1.04804	0.611444	-0.00666
		2.2	1.4221	1.25567	1.0486	0.612527	-0.00646
		2.20333	1.4206	1.25283	1.05186	0.612683	-0.00373
		2.20667	1.42177	1.25726	1.05018	0.613112	-0.0051
		2.21	1.42013	1.25628	1.05126	0.614121	-0.00726
		2.21333	1.42353	1.2589	1.05449	0.611866	-0.00917
		2.21667	1.42424	1.25631	1.05037	0.616378	-0.00659
		2.22	1.42144	1.25335	1.04892	0.614632	-0.00513
		2.22333	1.42369	1.25871	1.05371	0.619495	-0.00414
		2.22667	1.42797	1.261	1.05059	0.613516	-0.01126
		2.23	1.42496	1.26129	1.05395	0.615228	-0.00815
		2.23333	1.42741	1.25931	1.05646	0.61395	-0.00491
		2.23667	1.4285	1.26087	1.05314	0.614746	-0.00703
		2.24	1.43162	1.26191	1.05827	0.616154	-0.00308
		2.24333	1.42764	1.26255	1.06105	0.614416	-0.00601
		2.24667	1.43339	1.26274	1.05845	0.617188	-0.00733
		2.25	1.43116	1.26291	1.05728	0.621416	-0.001
		2.25333	1.43306	1.26647	1.06044	0.614369	-0.00288
		2.25667	1.43366	1.2612	1.06026	0.615912	-0.00462
		2.26	1.43232	1.26233	1.05862	0.614704	-0.00467
		2.26333	1.42938	1.26331	1.05764	0.620723	-0.00535
		2.26667	1.43241	1.26557	1.06208	0.618304	-0.00353
		2.27	1.43615	1.26507	1.06051	0.618382	-0.00435
		2.27333	1.4325	1.26309	1.06279	0.619487	-0.00499
		2.27667	1.43898	1.26685	1.06214	0.622631	-0.00848
		2.28	1.43792	1.26657	1.06214	0.619523	-0.00086
		2.28333	1.43671	1.26549	1.06026	0.617383	-0.00423
		2.28667	1.43899	1.26528	1.06706	0.622472	-0.0058
		2.29	1.44039	1.27058	1.06822	0.616553	-0.00763
		2.29333	1.43879	1.2712	1.06706	0.619402	-0.00797
		2.29667	1.43633	1.26988	1.06388	0.622489	-0.00509
		2.3	1.44332	1.26874	1.06345	0.62122	-0.0087
		2.30333	1.43836	1.26575	1.06488	0.623441	-0.00446
		2.30667	1.44358	1.26938	1.0657	0.619848	-0.00629
		2.31	1.44414	1.27407	1.06985	0.621322	-0.00945
		2.31333	1.44342	1.27375	1.06918	0.622041	-0.01028
		2.31667	1.44615	1.2727	1.06903	0.615187	-0.00693
		2.32	1.44533	1.27392	1.07051	0.623592	-0.00344
		2.32333	1.44457	1.27825	1.06829	0.62887	-0.00608
		2.32667	1.44997	1.27152	1.07165	0.627824	-0.00881
		2.33	1.44568	1.27464	1.067	0.62122	-0.00787
		2.33333	1.44695	1.27443	1.07032	0.621824	-0.00773
		2.33667	1.44575	1.27307	1.06975	0.624409	-0.00627
		2.34	1.44734	1.27615	1.0736	0.622379	-0.00234
		2.34333	1.44692	1.27507	1.07401	0.61922	-0.00445
		2.34667	1.44956	1.27618	1.07368	0.623291	-0.00499
		2.35	1.45253	1.27528	1.07312	0.624473	-0.0037
		2.35333	1.45279	1.27599	1.07304	0.627875	-0.00547
		2.35667	1.44988	1.2811	1.07369	0.625139	-0.00457
		2.36	1.45226	1.27665	1.07711	0.625602	-0.01031
		2.36333	1.45197	1.27916	1.07325	0.626477	-0.00615
		2.36667	1.45334	1.27431	1.07041	0.6242	-0.00697
		2.37	1.45415	1.27252	1.07885	0.626506	-0.00238
		2.37333	1.45656	1.27696	1.07792	0.62507	-0.00458
		2.37667	1.45344	1.27815	1.07232	0.629364	-0.00385
		2.38	1.45433	1.27763	1.07672	0.629877	-0.00701
		2.38333	1.45519	1.27992	1.07427	0.625721	-0.00825
		2.38667	1.45771	1.28442	1.07747	0.627396	-0.00902
		2.39	1.45964	1.27795	1.08411	0.628496	-0.00816
		2.39333	1.46218	1.27821	1.07763	0.624506	-0.00087
		2.39667	1.4544	1.27682	1.07912	0.628095	-0.00531
		2.4	1.45861	1.27896	1.0867	0.625674	-0.00534
		2.40333	1.45772	1.28212	1.08091	0.628567	-0.00946
		2.40667	1.46145	1.28254	1.07975	0.631295	-0.00893
		2.41	1.45808	1.28546	1.08461	0.627291	-0.00467
		2.41333	1.4579	1.28291	1.0822	0.624418	-0.00646
		2.41667	1.46315	1.28587	1.0867	0.629147	-0.00969
		2.42	1.46291	1.28334	1.08327	0.626016	-0.00652
		2.42333	1.46006	1.28504	1.08864	0.63124	-0.00397
		2.42667	1.46435	1.28973	1.08332	0.625049	-0.00682
		2.43	1.46237	1.28753	1.08464	0.627155	-0.0103
		2.43333	1.46495	1.2857	1.08048	0.632175	-0.00832
		2.43667	1.46755	1.28781	1.08672	0.628477	-0.00961
		2.44	1.46825	1.28977	1.08669	0.634751	-0.00808
		2.44333	1.46408	1.28857	1.08757	0.628255	-0.0061
		2.44667	1.46252	1.28669	1.08469	0.626671	-0.00556
		2.45	1.46883	1.29179	1.08755	0.630641	-0.00393
		2.45333	1.46755	1.2892	1.08675	0.632807	-0.00747
		2.45667	1.46787	1.28667	1.08366	0.629586	-0.00442
		2.46	1.47272	1.29523	1.09009	0.630594	-0.00394
		2.46333	1.47011	1.29059	1.0908	0.62811	-0.00918
		2.46667	1.46939	1.29025	1.08677	0.631167	-0.00695
		2.47	1.47032	1.29111	1.08798	0.632967	-0.00708
		2.47333	1.47034	1.29176	1.08763	0.633197	-0.00413
		2.47667	1.47159	1.28963	1.08978	0.628264	-0.01149
		2.48	1.46962	1.29474	1.0944	0.628813	-0.00703
		2.48333	1.4715	1.29143	1.0944	0.633651	-0.00701
		2.48667	1.47344	1.28998	1.09179	0.630356	-0.00839
		2.49	1.46816	1.29184	1.09481	0.632333	-0.00668
		2.49333	1.47581	1.29297	1.09218	0.630378	-0.00635
		2.49667	1.4719	1.29473	1.09841	0.633627	-0.00431
		2.5	1.478	1.28924	1.09637	0.636387	-0.01144
		2.50333	1.47696	1.29927	1.09663	0.633654	-0.00553
		2.50667	1.48031	1.29811	1.09262	0.635654	-0.00724
		2.51	1.4786	1.29306	1.09496	0.635127	-0.00577
		2.51333	1.48266	1.29768	1.09801	0.634318	-0.00714
		2.51667	1.48035	1.29586	1.09425	0.634559	-0.00972
		2.52	1.47671	1.2945	1.09611	0.631216	-0.00593
		2.52333	1.47989	1.297	1.09547	0.634267	-0.00564
		2.52667	1.48247	1.29954	1.10164	0.634225	-0.01093
		2.53	1.47822	1.29843	1.09694	0.634299	-0.00528
		2.53333	1.48302	1.29718	1.09346	0.635838	-0.00708
		2.53667	1.48319	1.29797	1.1002	0.631827	-0.00808
		2.54	1.48315	1.29556	1.10087	0.631736	-0.00868
		2.54333	1.48421	1.30055	1.09254	0.636929	-0.01093
		2.54667	1.48198	1.29616	1.10186	0.632452	-0.00725
		2.55	1.4839	1.29582	1.10346	0.638752	-0.00978
		2.55333	1.48453	1.29805	1.10126	0.635516	-0.00717
		2.55667	1.48577	1.30262	1.10132	0.635644	-0.00496
		2.56	1.48066	1.30379	1.10134	0.634072	-0.01135
		2.56333	1.48073	1.30458	1.10219	0.63766	-0.00986
		2.56667	1.48365	1.30015	1.10209	0.6394	-0.00282
		2.57	1.4875	1.30266	1.09746	0.635592	-0.00511
		2.57333	1.48644	1.30093	1.10214	0.638838	-0.0091
		2.57667	1.48981	1.30183	1.10455	0.638142	-0.01166
		2.58	1.48938	1.30143	1.10474	0.641897	-0.01051
		2.58333	1.49005	1.30471	1.1036	0.640116	-0.00631
		2.58667	1.49259	1.30656	1.10763	0.636264	-0.01106
		2.59	1.49025	1.30251	1.10468	0.638748	-0.01056
		2.59333	1.49218	1.30247	1.10661	0.645919	-0.00927
		2.59667	1.48835	1.3006	1.10564	0.642304	-0.00701
		2.6	1.49349	1.30239	1.10666	0.636999	-0.00821
		2.60333	1.49373	1.30657	1.10752	0.639124	-0.01078
		2.60667	1.48992	1.30687	1.10733	0.637256	-0.01375
		2.61	1.49161	1.30486	1.10927	0.641331	-0.00938
		2.61333	1.49282	1.30611	1.10758	0.644759	-0.00444
		2.61667	1.49387	1.30878	1.10502	0.644675	-0.00897
		2.62	1.49244	1.30672	1.10955	0.637601	-0.01109
		2.62333	1.49348	1.30772	1.11219	0.642001	-0.00799
		2.62667	1.49324	1.3051	1.10819	0.638587	-0.00477
		2.63	1.49683	1.30415	1.10903	0.642376	-0.00572
		2.63333	1.49148	1.30946	1.11333	0.642286	-0.00876
		2.63667	1.49578	1.30502	1.11423	0.642753	-0.00825
		2.64	1.49727	1.30957	1.10971	0.639268	-0.00728
		2.64333	1.5002	1.31015	1.10832	0.643927	-0.00802
		2.64667	1.50233	1.30881	1.11609	0.639962	-0.0118
		2.65	1.50094	1.30733	1.11476	0.635866	-0.0102
		2.65333	1.49531	1.31227	1.11076	0.641129	-0.00864
		2.65667	1.50113	1.30889	1.11306	0.639604	-0.00856
		2.66	1.50059	1.31069	1.11178	0.63993	-0.00514
		2.66333	1.50127	1.31156	1.11373	0.64524	-0.00695
		2.66667	1.50123	1.3081	1.1167	0.64529	-0.00761
		2.67	1.50094	1.31139	1.11552	0.643336	-0.00738
		2.67333	1.50455	1.31026	1.11659	0.644098	-0.00934
		2.67667	1.50737	1.3143	1.11638	0.643914	-0.00619
		2.68	1.50673	1.31287	1.11773	0.649352	-0.00777
		2.68333	1.50467	1.31535	1.11832	0.645509	-0.00896
		2.68667	1.50804	1.31513	1.11609	0.643646	-0.01189
		2.69	1.50758	1.31193	1.11972	0.645982	-0.0085
		2.69333	1.50774	1.31122	1.11862	0.646328	-0.01048
		2.69667	1.50749	1.31458	1.11756	0.644581	-0.01142
		2.7	1.50716	1.3157	1.12129	0.643965	-0.00633
		2.70333	1.50728	1.31503	1.12055	0.643815	-0.0123
		2.70667	1.50815	1.31622	1.11762	0.647062	-0.00634
		2.71	1.50686	1.31819	1.12314	0.64921	-0.00841
		2.71333	1.51436	1.31672	1.11778	0.646959	-0.00216
		2.71667	1.51247	1.31201	1.12318	0.644472	-0.0098
		2.72	1.51435	1.31375	1.12039	0.645235	-0.00785
		2.72333	1.51084	1.31462	1.11975	0.649346	-0.00822
		2.72667	1.50857	1.32378	1.12578	0.646949	-0.00845
		2.73	1.51284	1.31977	1.12176	0.648565	-0.00924
		2.73333	1.51322	1.32356	1.12655	0.646769	-0.01198
		2.73667	1.51074	1.31969	1.12607	0.645184	-0.01204
		2.74	1.51481	1.31963	1.12322	0.645626	-0.00607
		2.74333	1.51371	1.32427	1.12337	0.64953	-0.00938
		2.74667	1.51177	1.31728	1.12581	0.645604	-0.00247
		2.75	1.51394	1.32045	1.12351	0.650303	-0.01161
		2.75333	1.51472	1.321	1.12563	0.649733	-0.0082
		2.75667	1.51307	1.31974	1.12221	0.649863	-0.01303
		2.76	1.51329	1.31894	1.12322	0.64843	-0.00318
		2.76333	1.51937	1.3254	1.124	0.649338	-0.00722
		2.76667	1.51879	1.31839	1.12638	0.645982	-0.00856
		2.77	1.51682	1.32123	1.12577	0.648981	-0.00769
		2.77333	1.51842	1.32402	1.12928	0.647437	-0.01316
		2.77667	1.52041	1.32376	1.12863	0.651388	-0.00833
		2.78	1.5234	1.32017	1.13009	0.646245	-0.00862
		2.78333	1.51792	1.32388	1.12301	0.644522	-0.01003
		2.78667	1.52016	1.3211	1.1313	0.65206	-0.00496
		2.79	1.52064	1.32282	1.1295	0.651103	-0.00609
		2.79333	1.52187	1.32127	1.13179	0.648554	-0.01282
		2.79667	1.5226	1.32202	1.12885	0.650617	-0.0073
		2.8	1.52425	1.32429	1.13335	0.648404	-0.01449
		2.80333	1.52843	1.32906	1.13012	0.650459	-0.00813
		2.80667	1.52349	1.32692	1.13064	0.6519	-0.0143
		2.81	1.52573	1.32429	1.13097	0.651904	-0.01205
		2.81333	1.52005	1.32903	1.12958	0.644331	-0.00799
		2.81667	1.52602	1.32327	1.12812	0.647398	-0.00674
		2.82	1.52104	1.32599	1.13028	0.650642	-0.00736
		2.82333	1.52795	1.32722	1.13356	0.64847	-0.00743
		2.82667	1.52384	1.327	1.13255	0.651454	-0.00922
		2.83	1.52137	1.33272	1.13475	0.652552	-0.00731
		2.83333	1.52994	1.32763	1.13478	0.653352	-0.00792
		2.83667	1.52464	1.33018	1.13589	0.650453	-0.00871
		2.84	1.52968	1.33125	1.13366	0.653923	-0.01094
		2.84333	1.53231	1.32786	1.13366	0.651134	-0.00732
		2.84667	1.52723	1.32852	1.13661	0.653262	-0.01229
		2.85	1.53166	1.32839	1.13388	0.656886	-0.01188
		2.85333	1.53175	1.32949	1.13552	0.652305	-0.0088
		2.85667	1.52979	1.32839	1.1338	0.652292	-0.00791
		2.86	1.531	1.33136	1.13891	0.654745	-0.01156
		2.86333	1.53097	1.33237	1.14084	0.650153	-0.01396
		2.86667	1.53276	1.33372	1.13619	0.651401	-0.0115
		2.87	1.53774	1.33015	1.1405	0.652758	-0.01017
		2.87333	1.53259	1.32969	1.13528	0.652734	-0.00927
		2.87667	1.53766	1.33372	1.13931	0.653344	-0.00989
		2.88	1.53202	1.33103	1.13734	0.653495	-0.01171
		2.88333	1.53659	1.33051	1.14454	0.65757	-0.00761
		2.88667	1.53813	1.33169	1.14168	0.654754	-0.00767
		2.89	1.52746	1.32811	1.13912	0.649509	-0.00797
		2.89333	1.53679	1.3303	1.13726	0.654078	-0.00461
		2.89667	1.53919	1.331	1.14196	0.656059	-0.00886
		2.9	1.53277	1.33535	1.13652	0.653306	-0.01129
		2.90333	1.53689	1.33408	1.13934	0.659105	-0.00727
		2.90667	1.53727	1.33238	1.14099	0.655539	-0.01082
		2.91	1.53703	1.33591	1.13766	0.656589	-0.01061
		2.91333	1.5366	1.33439	1.13762	0.658069	-0.01003
		2.91667	1.53391	1.33115	1.1429	0.654938	-0.01102
		2.92	1.54462	1.33459	1.14107	0.657332	-0.01299
		2.92333	1.53691	1.33094	1.14441	0.653995	-0.00735
		2.92667	1.53929	1.33521	1.1438	0.654262	-0.01027
		2.93	1.5417	1.33385	1.14699	0.658432	-0.01056
		2.93333	1.53952	1.33489	1.14198	0.661408	-0.01104
		2.93667	1.54113	1.33134	1.14869	0.657481	-0.01037
		2.94	1.53918	1.33861	1.14703	0.658645	-0.00801
		2.94333	1.54149	1.33554	1.14749	0.657134	-0.008
		2.94667	1.5424	1.33476	1.1452	0.661695	-0.01353
		2.95	1.54207	1.33809	1.14673	0.657585	-0.01162
		2.95333	1.54461	1.33975	1.1443	0.661921	-0.00633
		2.95667	1.54156	1.33759	1.14753	0.657998	-0.00969
		2.96	1.55168	1.34304	1.14733	0.659855	-0.01177
		2.96333	1.54557	1.33768	1.15075	0.65701	-0.00833
		2.96667	1.54216	1.33829	1.14774	0.657683	-0.01014
		2.97	1.54827	1.33948	1.14677	0.657239	-0.00783
		2.97333	1.54622	1.33979	1.14846	0.657918	-0.01422
		2.97667	1.54401	1.34137	1.14935	0.656499	-0.01135
		2.98	1.54952	1.34327	1.15238	0.661104	-0.00866
		2.98333	1.55087	1.33912	1.14719	0.661721	-0.00877
		2.98667	1.55238	1.33983	1.1468	0.66231	-0.01054
		2.99	1.55283	1.33992	1.15204	0.660232	-0.01043
		2.99333	1.54893	1.33865	1.14803	0.655981	-0.00808
		2.99667	1.54746	1.34046	1.15315	0.657651	-0.00803
		3	1.54523	1.341	1.15047	0.662838	-0.00989
		3.00333	1.54888	1.34316	1.15239	0.657351	-0.00898
		3.00667	1.55094	1.34222	1.14898	0.658209	-0.00874
		3.01	1.55408	1.34265	1.15623	0.657293	-0.01321
		3.01333	1.54809	1.34116	1.15049	0.660775	-0.0119
		3.01667	1.55067	1.34282	1.15188	0.662323	-0.01042
		3.02	1.5494	1.34443	1.15509	0.659719	-0.01037
		3.02333	1.55492	1.34301	1.15209	0.663831	-0.01583
		3.02667	1.55297	1.34608	1.15448	0.661836	-0.0073
		3.03	1.5532	1.34681	1.15419	0.660475	-0.01145
		3.03333	1.55463	1.35078	1.15377	0.659535	-0.01058
		3.03667	1.55272	1.3469	1.16051	0.661183	-0.00791
		3.04	1.56062	1.34717	1.16068	0.665331	-0.0104
		3.04333	1.55	1.34367	1.15674	0.663261	-0.01445
		3.04667	1.55366	1.34594	1.15963	0.668217	-0.01493
		3.05	1.55538	1.34932	1.15729	0.662367	-0.01076
		3.05333	1.55813	1.34553	1.15603	0.664338	-0.01172
		3.05667	1.55471	1.34966	1.15653	0.661476	-0.01217
		3.06	1.55787	1.35186	1.15686	0.666402	-0.01065
		3.06333	1.55975	1.34627	1.15393	0.662483	-0.01056
		3.06667	1.56061	1.34809	1.158	0.666135	-0.01104
		3.07	1.56024	1.35142	1.15562	0.666096	-0.00607
		3.07333	1.56127	1.34928	1.15552	0.66231	-0.0095
		3.07667	1.55796	1.34919	1.15482	0.66149	-0.007
		3.08	1.55649	1.34781	1.16104	0.662759	-0.00678
		3.08333	1.55838	1.35035	1.16048	0.663789	-0.00933
		3.08667	1.56248	1.34677	1.16076	0.663197	-0.00879
		3.09	1.56173	1.34661	1.15965	0.663404	-0.00801
		3.09333	1.56118	1.34847	1.1569	0.662553	-0.01007
		3.09667	1.56035	1.35064	1.16196	0.663958	-0.00912
		3.1	1.56252	1.34906	1.15767	0.66489	-0.01381
		3.10333	1.56122	1.34935	1.15997	0.667696	-0.01133
		3.10667	1.56562	1.35206	1.16165	0.666159	-0.01418
		3.11	1.5584	1.35122	1.15953	0.665749	-0.01194
		3.11333	1.56483	1.34792	1.16118	0.667405	-0.01172
		3.11667	1.56396	1.35276	1.16552	0.6642	-0.01354
		3.12	1.56334	1.3562	1.15835	0.662707	-0.01109
		3.12333	1.56575	1.35343	1.1626	0.669816	-0.01073
		3.12667	1.56715	1.35194	1.16327	0.662155	-0.01034
		3.13	1.56654	1.35728	1.16393	0.663472	-0.0122
		3.13333	1.56371	1.35275	1.15937	0.6614	-0.00857
		3.13667	1.57065	1.3549	1.16304	0.668929	-0.0117
		3.14	1.56744	1.351	1.16733	0.667703	-0.01297
		3.14333	1.56919	1.35444	1.16468	0.665723	-0.00832
		3.14667	1.56429	1.35576	1.16592	0.66757	-0.01087
		3.15	1.5711	1.35439	1.1646	0.664589	-0.00995
		3.15333	1.56963	1.35767	1.16647	0.668741	-0.01271
		3.15667	1.56933	1.35343	1.16408	0.668242	-0.00952
		3.16	1.57346	1.3545	1.16646	0.664013	-0.01139
		3.16333	1.57281	1.35819	1.1675	0.663051	-0.01014
		3.16667	1.57022	1.35399	1.16597	0.665533	-0.01327
		3.17	1.57432	1.35484	1.16979	0.667624	-0.01359
		3.17333	1.56662	1.35756	1.17074	0.664048	-0.01221
		3.17667	1.57206	1.35704	1.16873	0.666053	-0.01094
		3.18	1.57444	1.35867	1.17018	0.667114	-0.00929
		3.18333	1.57439	1.35453	1.17154	0.66574	-0.01619
		3.18667	1.5717	1.35736	1.17042	0.669362	-0.01048
		3.19	1.57269	1.35928	1.17024	0.668288	-0.01005
		3.19333	1.58202	1.35801	1.17257	0.669257	-0.00932
		3.19667	1.57523	1.35719	1.17197	0.669825	-0.00877
		3.2	1.57679	1.36005	1.16712	0.668762	-0.01322
		3.20333	1.58083	1.35938	1.17065	0.666915	-0.00806
		3.20667	1.577	1.35784	1.17237	0.67063	-0.01362
		3.21	1.57757	1.35928	1.16923	0.664918	-0.01432
		3.21333	1.57462	1.36077	1.17301	0.6687	-0.01407
		3.21667	1.57623	1.3595	1.16783	0.670328	-0.01214
		3.22	1.5804	1.35947	1.17237	0.672266	-0.01425
		3.22333	1.58092	1.36379	1.17077	0.669216	-0.01244
		3.22667	1.57489	1.35886	1.16794	0.66519	-0.0123
		3.23	1.58241	1.35995	1.17227	0.670691	-0.01108
		3.23333	1.58182	1.35908	1.17598	0.666754	-0.00872
		3.23667	1.58195	1.35849	1.17309	0.666636	-0.01487
		3.24	1.58303	1.36327	1.17675	0.669523	-0.01387
		3.24333	1.58255	1.36547	1.17343	0.671895	-0.00933
		3.24667	1.58261	1.3644	1.18047	0.672524	-0.00707
		3.25	1.58205	1.36309	1.17827	0.664977	-0.01227
		3.25333	1.58163	1.36161	1.17542	0.669236	-0.01327
		3.25667	1.58312	1.36447	1.17526	0.668682	-0.01215
		3.26	1.57708	1.36094	1.17405	0.671895	-0.01085
		3.26333	1.5838	1.36218	1.17794	0.672582	-0.01548
		3.26667	1.58892	1.36439	1.17422	0.674151	-0.01179
		3.27	1.58297	1.36144	1.17303	0.67108	-0.01334
		3.27333	1.58672	1.36204	1.17563	0.670533	-0.01172
		3.27667	1.58516	1.3623	1.17893	0.674936	-0.01439
		3.28	1.58435	1.36085	1.17991	0.670408	-0.01401
		3.28333	1.58548	1.36414	1.17747	0.671293	-0.01166
		3.28667	1.588	1.36444	1.17613	0.674023	-0.00922
		3.29	1.588	1.36359	1.17806	0.670023	-0.01456
		3.29333	1.58518	1.36136	1.1788	0.668292	-0.0141
		3.29667	1.5895	1.36141	1.17854	0.671862	-0.00686
		3.3	1.58777	1.36777	1.17803	0.673501	-0.00741
		3.30333	1.59036	1.36755	1.17975	0.672855	-0.01105
		3.30667	1.59141	1.37136	1.17928	0.672975	-0.01068
		3.31	1.58782	1.3654	1.17811	0.678288	-0.01186
		3.31333	1.58969	1.36559	1.18271	0.673996	-0.00863
		3.31667	1.58876	1.36969	1.18031	0.67302	-0.01197
		3.32	1.59094	1.36572	1.18292	0.67715	-0.01098
		3.32333	1.58733	1.36913	1.17973	0.67273	-0.01058
		3.32667	1.5922	1.36878	1.18503	0.673713	-0.0088
		3.33	1.59385	1.36872	1.18293	0.676171	-0.01268
		3.33333	1.59309	1.36964	1.17861	0.673993	-0.0087
		3.33667	1.59102	1.3712	1.18405	0.673175	-0.01262
		3.34	1.59649	1.36666	1.1805	0.671499	-0.01357
		3.34333	1.59356	1.37235	1.18433	0.671647	-0.01142
		3.34667	1.59163	1.3711	1.17885	0.670987	-0.00851
		3.35	1.59604	1.3733	1.18271	0.673438	-0.01261
		3.35333	1.59157	1.3737	1.18244	0.673272	-0.01216
		3.35667	1.59865	1.37497	1.1867	0.675336	-0.01397
		3.36	1.59566	1.37044	1.18446	0.672579	-0.00846
		3.36333	1.59588	1.36902	1.18483	0.668813	-0.01129
		3.36667	1.59457	1.36969	1.18576	0.673743	-0.01178
		3.37	1.59638	1.37162	1.1829	0.675709	-0.01533
		3.37333	1.59699	1.3695	1.18727	0.67783	-0.0104
		3.37667	1.59366	1.37123	1.18884	0.677382	-0.01398
		3.38	1.59906	1.373	1.18274	0.67723	-0.01523
		3.38333	1.60272	1.37211	1.18463	0.678496	-0.01108
		3.38667	1.59875	1.37303	1.18487	0.678743	-0.01284
		3.39	1.59839	1.374	1.18903	0.674457	-0.0123
		3.39333	1.59827	1.37275	1.1878	0.68015	-0.01252
		3.39667	1.59717	1.37234	1.18748	0.678388	-0.01306
		3.4	1.60097	1.37454	1.18844	0.677699	-0.01046
		3.40333	1.60474	1.37397	1.18868	0.680745	-0.01104
		3.40667	1.59926	1.37257	1.19089	0.677634	-0.01316
		3.41	1.60109	1.37318	1.19106	0.678563	-0.00799
		3.41333	1.59832	1.37339	1.18387	0.674357	-0.01366
		3.41667	1.5997	1.37731	1.18837	0.675417	-0.01296
		3.42	1.60124	1.3743	1.18658	0.678507	-0.00884
		3.42333	1.60028	1.37421	1.18449	0.675767	-0.00702
		3.42667	1.60026	1.379	1.19373	0.680735	-0.01057
		3.43	1.60289	1.37502	1.19088	0.674873	-0.01018
		3.43333	1.60227	1.37104	1.1954	0.676244	-0.01004
		3.43667	1.60276	1.37316	1.19051	0.677462	-0.01012
		3.44	1.60788	1.37403	1.19048	0.678923	-0.01282
		3.44333	1.60646	1.37953	1.19059	0.679111	-0.00992
		3.44667	1.60336	1.37461	1.18927	0.677344	-0.00987
		3.45	1.60574	1.37706	1.19304	0.678992	-0.01081
		3.45333	1.60858	1.37526	1.19691	0.682317	-0.01101
		3.45667	1.60646	1.38048	1.19591	0.678724	-0.01331
		3.46	1.60444	1.37868	1.19317	0.678008	-0.0115
		3.46333	1.60475	1.37896	1.19454	0.679042	-0.00925
		3.46667	1.6079	1.37825	1.19463	0.676902	-0.01173
		3.47	1.61125	1.3796	1.19	0.680658	-0.01235
		3.47333	1.60948	1.37638	1.19125	0.6782	-0.00961
		3.47667	1.61047	1.377	1.19743	0.676628	-0.01471
		3.48	1.6107	1.38335	1.19102	0.68121	-0.01145
		3.48333	1.60877	1.38368	1.19558	0.6832	-0.01547
		3.48667	1.6098	1.37821	1.1997	0.678962	-0.01516
		3.49	1.60841	1.38201	1.19547	0.681016	-0.01564
		3.49333	1.60924	1.37609	1.19596	0.67959	-0.01241
		3.49667	1.61363	1.38483	1.19834	0.681308	-0.01241
		3.5	1.60852	1.38152	1.19773	0.679664	-0.0093
		3.50333	1.61513	1.3857	1.19599	0.680127	-0.01279
		3.50667	1.60867	1.38543	1.19725	0.67946	-0.01037
		3.51	1.61162	1.37879	1.19755	0.676715	-0.01183
		3.51333	1.60979	1.38243	1.20411	0.682417	-0.01573
		3.51667	1.61296	1.3797	1.19168	0.678847	-0.01419
		3.52	1.6167	1.38398	1.19847	0.679982	-0.0138
		3.52333	1.61578	1.3825	1.19856	0.683229	-0.01443
		3.52667	1.61045	1.38199	1.19743	0.68399	-0.0141
		3.53	1.61272	1.38176	1.1986	0.68312	-0.01253
		3.53333	1.61208	1.38378	1.20058	0.682077	-0.01597
		3.53667	1.61488	1.38204	1.19876	0.679201	-0.01572
		3.54	1.61654	1.38151	1.19593	0.681424	-0.01567
		3.54333	1.61749	1.38776	1.19678	0.682001	-0.0122
		3.54667	1.61409	1.38265	1.19869	0.680204	-0.01253
		3.55	1.61299	1.38208	1.19762	0.68457	-0.01686
		3.55333	1.61305	1.38551	1.199	0.681831	-0.01219
		3.55667	1.61769	1.38628	1.19801	0.683241	-0.01297
		3.56	1.61478	1.38519	1.19837	0.684009	-0.01253
		3.56333	1.62139	1.38636	1.20091	0.684627	-0.01505
		3.56667	1.6204	1.38823	1.19698	0.680548	-0.01497
		3.57	1.62039	1.38643	1.19971	0.679341	-0.01267
		3.57333	1.6191	1.38712	1.20128	0.686034	-0.01547
		3.57667	1.62324	1.38444	1.20206	0.680915	-0.01395
		3.58	1.62026	1.38493	1.19865	0.683382	-0.01522
		3.58333	1.62241	1.3877	1.19982	0.68256	-0.01416
		3.58667	1.62221	1.38283	1.20162	0.680339	-0.01413
		3.59	1.62276	1.38545	1.20461	0.679747	-0.01288
		3.59333	1.62271	1.38712	1.20374	0.682187	-0.01469
		3.59667	1.61973	1.38697	1.20793	0.683749	-0.01061
		3.6	1.62497	1.38346	1.20381	0.682842	-0.01449
		3.60333	1.62884	1.38642	1.20144	0.685654	-0.01149
		3.60667	1.6194	1.39276	1.20341	0.683787	-0.01136
		3.61	1.62263	1.38511	1.2057	0.681335	-0.01588
		3.61333	1.62371	1.39223	1.20451	0.683813	-0.01048
		3.61667	1.62519	1.38891	1.20366	0.686702	-0.01376
		3.62	1.62071	1.39169	1.20795	0.681561	-0.01303
		3.62333	1.62654	1.3854	1.20881	0.681936	-0.01538
		3.62667	1.62493	1.386	1.20705	0.686068	-0.01429
		3.63	1.62874	1.39455	1.20318	0.683482	-0.01528
		3.63333	1.62573	1.39158	1.20789	0.681849	-0.0116
		3.63667	1.63015	1.39303	1.21017	0.685488	-0.01213
		3.64	1.62859	1.38682	1.20977	0.681844	-0.00965
		3.64333	1.62954	1.38949	1.20075	0.683879	-0.01671
		3.64667	1.62273	1.39171	1.20565	0.684516	-0.01718
		3.65	1.62703	1.39248	1.20572	0.68504	-0.00788
		3.65333	1.62977	1.39085	1.20517	0.690155	-0.01414
		3.65667	1.6284	1.39345	1.20765	0.684653	-0.01207
		3.66	1.62797	1.39389	1.20819	0.68392	-0.0116
		3.66333	1.6326	1.39263	1.20738	0.686357	-0.01311
		3.66667	1.62667	1.39349	1.20642	0.690167	-0.01573
		3.67	1.63101	1.39214	1.20686	0.686019	-0.01465
		3.67333	1.63275	1.39254	1.21109	0.684016	-0.01439
		3.67667	1.63621	1.39569	1.2162	0.682832	-0.00702
		3.68	1.62989	1.38986	1.20543	0.683494	-0.00995
		3.68333	1.63187	1.39586	1.20787	0.683163	-0.01659
		3.68667	1.63383	1.39172	1.21372	0.683846	-0.00968
		3.69	1.63561	1.39138	1.21042	0.687055	-0.0149
		3.69333	1.63231	1.39248	1.21226	0.683056	-0.0152
		3.69667	1.63181	1.39179	1.21008	0.683797	-0.01278
		3.7	1.63201	1.39565	1.20941	0.687347	-0.0136
		3.70333	1.63645	1.39339	1.21119	0.684102	-0.01673
		3.70667	1.63569	1.39142	1.21321	0.685152	-0.01382
		3.71	1.63459	1.39298	1.21145	0.688916	-0.01368
		3.71333	1.63716	1.39339	1.2116	0.686858	-0.01575
		3.71667	1.63923	1.39427	1.21402	0.689753	-0.01608
		3.72	1.63436	1.39474	1.21805	0.686237	-0.01333
		3.72333	1.63331	1.39453	1.21055	0.689502	-0.01285
		3.72667	1.63599	1.39505	1.20678	0.685708	-0.01511
		3.73	1.63921	1.39721	1.22042	0.68349	-0.01214
		3.73333	1.63252	1.39534	1.2098	0.689969	-0.01427
		3.73667	1.63946	1.39607	1.21206	0.685968	-0.01397
		3.74	1.63998	1.39438	1.21574	0.685872	-0.01481
		3.74333	1.63714	1.39756	1.21505	0.68849	-0.01335
		3.74667	1.64352	1.39762	1.21164	0.690607	-0.01501
		3.75	1.63928	1.39661	1.21177	0.686793	-0.01323
		3.75333	1.64322	1.39541	1.21534	0.689564	-0.01165
		3.75667	1.63757	1.3947	1.21451	0.684123	-0.01545
		3.76	1.63825	1.3987	1.21638	0.68996	-0.01194
		3.76333	1.63867	1.40213	1.2135	0.687093	-0.01341
		3.76667	1.63669	1.40102	1.21597	0.688593	-0.01573
		3.77	1.63957	1.39408	1.21766	0.686314	-0.01466
		3.77333	1.63793	1.39963	1.2158	0.687314	-0.01689
		3.77667	1.64	1.3984	1.21589	0.6911	-0.01242
		3.78	1.64138	1.39892	1.21743	0.690509	-0.00885
		3.78333	1.64622	1.40015	1.21486	0.685121	-0.01008
		3.78667	1.63999	1.39905	1.21572	0.688343	-0.01583
		3.79	1.64161	1.39655	1.21264	0.693159	-0.01774
		3.79333	1.64297	1.40077	1.21849	0.689708	-0.01171
		3.79667	1.64348	1.39803	1.21586	0.689677	-0.01801
		3.8	1.64599	1.40345	1.21465	0.688926	-0.01588
		3.80333	1.64583	1.40019	1.2185	0.6913	-0.0133
		3.80667	1.64844	1.40375	1.22377	0.690194	-0.01551
		3.81	1.64541	1.39814	1.21983	0.69068	-0.01206
		3.81333	1.64814	1.40014	1.21894	0.687968	-0.01637
		3.81667	1.64584	1.4064	1.21722	0.694331	-0.0116
		3.82	1.64592	1.39738	1.22119	0.69497	-0.01582
		3.82333	1.64543	1.39842	1.22053	0.690812	-0.01706
		3.82667	1.64655	1.40259	1.22141	0.68921	-0.01172
		3.83	1.64864	1.39826	1.21979	0.690633	-0.01671
		3.83333	1.65289	1.40578	1.21811	0.689924	-0.00992
		3.83667	1.64578	1.39959	1.2234	0.689914	-0.01561
		3.84	1.64725	1.40083	1.22073	0.690778	-0.01549
		3.84333	1.64956	1.40453	1.21933	0.692422	-0.01389
		3.84667	1.64775	1.40094	1.21743	0.689777	-0.01864
		3.85	1.64894	1.40356	1.21979	0.690632	-0.01674
		3.85333	1.65154	1.402	1.22342	0.691826	-0.01813
		3.85667	1.64924	1.40203	1.22324	0.691108	-0.0145
		3.86	1.65063	1.40493	1.2198	0.694171	-0.01648
		3.86333	1.65113	1.40399	1.21892	0.692733	-0.01193
		3.86667	1.65123	1.40615	1.22295	0.694482	-0.01291
		3.87	1.65117	1.4019	1.21797	0.695621	-0.0172
		3.87333	1.65441	1.40403	1.22224	0.694223	-0.01008
		3.87667	1.65116	1.40512	1.22236	0.69039	-0.01268
		3.88	1.65267	1.40962	1.22531	0.695477	-0.01219
		3.88333	1.65339	1.4057	1.22107	0.693047	-0.0162
		3.88667	1.65171	1.40311	1.22654	0.692104	-0.01579
		3.89	1.65494	1.40272	1.22082	0.695032	-0.01271
		3.89333	1.65581	1.40721	1.22596	0.693096	-0.01259
		3.89667	1.65186	1.40268	1.22388	0.692897	-0.01275
		3.9	1.6547	1.40867	1.22131	0.695545	-0.01157
		3.90333	1.65129	1.40434	1.22466	0.693175	-0.01675
		3.90667	1.65469	1.40607	1.22727	0.694381	-0.01523
		3.91	1.65582	1.40591	1.22349	0.692854	-0.01548
		3.91333	1.6583	1.40759	1.22495	0.691412	-0.01645
		3.91667	1.66088	1.40667	1.22778	0.692321	-0.01689
		3.92	1.65401	1.40526	1.22548	0.68866	-0.01339
		3.92333	1.65918	1.40796	1.22582	0.693533	-0.01298
		3.92667	1.65881	1.40892	1.22755	0.691884	-0.0159
		3.93	1.65502	1.40782	1.22494	0.689626	-0.01294
		3.93333	1.65638	1.40768	1.22937	0.687475	-0.01081
		3.93667	1.65786	1.40332	1.22777	0.688575	-0.01674
		3.94	1.65738	1.40635	1.2264	0.696555	-0.01765
		3.94333	1.66265	1.40712	1.23258	0.6932	-0.01673
		3.94667	1.66131	1.40929	1.2353	0.699019	-0.01727
		3.95	1.65918	1.4027	1.22805	0.692863	-0.01484
		3.95333	1.65825	1.41004	1.22958	0.69387	-0.0156
		3.95667	1.6623	1.41261	1.22946	0.6934	-0.01346
		3.96	1.66563	1.40869	1.22851	0.697966	-0.01246
		3.96333	1.66385	1.40655	1.23206	0.695036	-0.01749
		3.96667	1.66005	1.41045	1.23255	0.692428	-0.01383
		3.97	1.65754	1.41087	1.23183	0.692085	-0.01295
		3.97333	1.66125	1.40898	1.23038	0.693068	-0.013
		3.97667	1.66871	1.41016	1.22914	0.691789	-0.01534
		3.98	1.65958	1.40967	1.22553	0.695916	-0.01101
		3.98333	1.6626	1.41197	1.23031	0.693755	-0.01348
		3.98667	1.65946	1.40726	1.23174	0.690636	-0.01244
		3.99	1.66429	1.41362	1.22646	0.694931	-0.01214
		3.99333	1.66443	1.41122	1.22822	0.696161	-0.01516
		3.99667	1.66739	1.41245	1.22715	0.6936	-0.01511
		4	1.66581	1.41067	1.23118	0.695431	-0.01511
		4.00333	1.66683	1.41008	1.23067	0.698315	-0.01424
		4.00667	1.66378	1.41485	1.23332	0.692007	-0.01495
		4.01	1.66265	1.40862	1.23072	0.696797	-0.01685
		4.01333	1.66501	1.41326	1.2319	0.691272	-0.01652
		4.01667	1.66387	1.41287	1.23239	0.698083	-0.02081
		4.02	1.66634	1.40914	1.22813	0.692007	-0.0155
		4.02333	1.67015	1.4148	1.23236	0.691152	-0.01454
		4.02667	1.66712	1.41184	1.23074	0.694538	-0.01748
		4.03	1.66585	1.41466	1.23335	0.696354	-0.0197
		4.03333	1.67072	1.41465	1.23727	0.69948	-0.01602
		4.03667	1.67321	1.41645	1.2372	0.697485	-0.01096
		4.04	1.67056	1.41152	1.23353	0.697965	-0.02015
		4.04333	1.67349	1.40961	1.23906	0.695603	-0.01664
		4.04667	1.67141	1.41284	1.2333	0.6994	-0.01619
		4.05	1.67071	1.4128	1.23375	0.69465	-0.0164
		4.05333	1.67329	1.41009	1.23447	0.696098	-0.01814
		4.05667	1.66884	1.41322	1.23591	0.70188	-0.01816
		4.06	1.67474	1.41414	1.24043	0.695911	-0.0161
		4.06333	1.67309	1.41256	1.2392	0.692884	-0.0142
		4.06667	1.6714	1.41715	1.23513	0.694419	-0.01378
		4.07	1.66635	1.4173	1.24065	0.700523	-0.01649
		4.07333	1.67476	1.41582	1.23656	0.699813	-0.01049
		4.07667	1.66809	1.41695	1.23725	0.696656	-0.01812
		4.08	1.66891	1.4147	1.23506	0.699796	-0.01476
		4.08333	1.67435	1.41456	1.24131	0.700326	-0.01351
		4.08667	1.67621	1.41714	1.23934	0.702119	-0.01297
		4.09	1.67592	1.41591	1.23341	0.699045	-0.02005
		4.09333	1.67284	1.41566	1.23927	0.698573	-0.01589
		4.09667	1.67365	1.4143	1.2381	0.699802	-0.01835
		4.1	1.67697	1.42065	1.23922	0.694339	-0.01346
		4.10333	1.67253	1.4158	1.23662	0.701657	-0.01225
		4.10667	1.67446	1.41688	1.24002	0.697745	-0.01562
		4.11	1.67947	1.41521	1.23866	0.697722	-0.01208
		4.11333	1.67975	1.42047	1.23767	0.695422	-0.01683
		4.11667	1.6774	1.41615	1.23985	0.699393	-0.01736
		4.12	1.67573	1.42023	1.23872	0.702905	-0.01723
		4.12333	1.67847	1.4166	1.23805	0.69409	-0.01459
		4.12667	1.67464	1.42356	1.24237	0.700678	-0.01628
		4.13	1.67478	1.42003	1.23984	0.705979	-0.01972
		4.13333	1.6806	1.42043	1.23852	0.701078	-0.01733
		4.13667	1.6803	1.41691	1.23747	0.697804	-0.01795
		4.14	1.68059	1.42146	1.24357	0.702336	-0.01609
		4.14333	1.6827	1.41934	1.24035	0.700509	-0.01836
		4.14667	1.68086	1.41819	1.24275	0.701008	-0.01701
		4.15	1.68118	1.41871	1.23854	0.699574	-0.01583
		4.15333	1.67701	1.42299	1.24408	0.698572	-0.017
		4.15667	1.67839	1.42564	1.24188	0.698617	-0.01721
		4.16	1.68018	1.42336	1.24087	0.699055	-0.01741
		4.16333	1.679	1.41905	1.24057	0.701945	-0.02042
		4.16667	1.68224	1.42209	1.2455	0.698565	-0.0149
		4.17	1.68048	1.42246	1.24513	0.698805	-0.01558
		4.17333	1.68283	1.42429	1.2387	0.702711	-0.01892
		4.17667	1.68543	1.42338	1.24055	0.699512	-0.01697
		4.18	1.68437	1.42145	1.24219	0.701233	-0.02017
		4.18333	1.67994	1.42366	1.24149	0.699364	-0.01939
		4.18667	1.68586	1.42374	1.24509	0.703913	-0.01706
		4.19	1.68181	1.42322	1.24356	0.700694	-0.01706
		4.19333	1.67952	1.42364	1.24498	0.699374	-0.01742
		4.19667	1.68039	1.42301	1.24253	0.700087	-0.01849
		4.2	1.68353	1.41923	1.24129	0.702794	-0.01832
		4.20333	1.68036	1.42524	1.24643	0.703344	-0.01356
		4.20667	1.68608	1.41961	1.24415	0.695868	-0.01784
		4.21	1.68596	1.42302	1.24189	0.706545	-0.01305
		4.21333	1.68691	1.42711	1.24541	0.703849	-0.01799
		4.21667	1.68375	1.42428	1.24665	0.70509	-0.01658
		4.22	1.68971	1.42643	1.2482	0.699478	-0.01561
		4.22333	1.68582	1.42167	1.24903	0.707415	-0.01428
		4.22667	1.68623	1.42511	1.24578	0.702422	-0.01857
		4.23	1.68595	1.42047	1.24814	0.705757	-0.02043
		4.23333	1.68709	1.42304	1.24433	0.702992	-0.01663
		4.23667	1.69185	1.42299	1.24524	0.705053	-0.01824
		4.24	1.69011	1.42414	1.24749	0.700712	-0.01907
		4.24333	1.68946	1.42455	1.24845	0.704679	-0.01852
		4.24667	1.68962	1.43208	1.24653	0.705942	-0.01806
		4.25	1.68765	1.42591	1.24755	0.704859	-0.02054
		4.25333	1.68929	1.43125	1.248	0.703604	-0.01786
		4.25667	1.69143	1.42452	1.2512	0.708363	-0.01462
		4.26	1.69133	1.42579	1.25106	0.704268	-0.01922
		4.26333	1.68899	1.42782	1.24727	0.701115	-0.01698
		4.26667	1.69133	1.42776	1.25098	0.704959	-0.01765
		4.27	1.68795	1.43041	1.25434	0.701238	-0.01959
		4.27333	1.69491	1.42338	1.24614	0.702885	-0.01661
		4.27667	1.69147	1.42712	1.24883	0.703564	-0.01817
		4.28	1.69817	1.43044	1.24914	0.701952	-0.01862
		4.28333	1.69382	1.4267	1.24842	0.709823	-0.01909
		4.28667	1.69263	1.42827	1.24706	0.701616	-0.01754
		4.29	1.69202	1.42569	1.25214	0.704847	-0.01504
		4.29333	1.69343	1.42965	1.25075	0.705022	-0.01633
		4.29667	1.69314	1.42449	1.24961	0.701633	-0.0181
		4.3	1.69577	1.42888	1.24829	0.701142	-0.01684
		4.30333	1.69337	1.43224	1.2536	0.700685	-0.01742
		4.30667	1.69207	1.42538	1.24906	0.700955	-0.01858
		4.31	1.69187	1.42967	1.25143	0.702979	-0.01557
		4.31333	1.69629	1.42777	1.25144	0.703712	-0.0174
		4.31667	1.69494	1.43024	1.25181	0.704996	-0.01398
		4.32	1.69755	1.42891	1.25439	0.698262	-0.01734
		4.32333	1.69551	1.42746	1.25128	0.704783	-0.0164
		4.32667	1.69547	1.42986	1.25307	0.701943	-0.02064
		4.33	1.69655	1.43156	1.25181	0.704034	-0.01962
		4.33333	1.69546	1.43022	1.2555	0.706005	-0.01853
		4.33667	1.6993	1.42711	1.25591	0.701045	-0.01728
		4.34	1.70139	1.42961	1.25288	0.703449	-0.02076
		4.34333	1.69894	1.42888	1.25385	0.70453	-0.02406
		4.34667	1.69979	1.42644	1.25526	0.707355	-0.02042
		4.35	1.69808	1.42973	1.2538	0.702129	-0.01773
		4.35333	1.69939	1.42895	1.25738	0.707082	-0.01758
		4.35667	1.70223	1.43037	1.2551	0.705785	-0.02113
		4.36	1.70098	1.43274	1.25342	0.711602	-0.01989
		4.36333	1.69848	1.42819	1.2553	0.705117	-0.01733
		4.36667	1.70131	1.43202	1.25422	0.705257	-0.01907
		4.37	1.70017	1.43698	1.25551	0.704263	-0.01572
		4.37333	1.70153	1.42649	1.25458	0.70818	-0.0148
		4.37667	1.70162	1.43257	1.25058	0.703465	-0.01864
		4.38	1.70158	1.43218	1.25321	0.703862	-0.02098
		4.38333	1.70313	1.43216	1.25425	0.704564	-0.01755
		4.38667	1.70114	1.43172	1.258	0.707503	-0.01077
		4.39	1.70401	1.42982	1.25837	0.710907	-0.02064
		4.39333	1.70109	1.43407	1.25703	0.702356	-0.0178
		4.39667	1.70601	1.43381	1.25736	0.705847	-0.02355
		4.4	1.70534	1.43347	1.25825	0.710672	-0.02137
		4.40333	1.70347	1.43871	1.2572	0.704712	-0.01775
		4.40667	1.70616	1.43743	1.2552	0.705824	-0.02038
		4.41	1.70409	1.43422	1.25842	0.708617	-0.01768
		4.41333	1.70685	1.43521	1.25894	0.702083	-0.01696
		4.41667	1.70803	1.43273	1.26029	0.704143	-0.01736
		4.42	1.70402	1.43274	1.26595	0.709034	-0.01631
		4.42333	1.70806	1.43328	1.25328	0.710586	-0.01831
		4.42667	1.70434	1.43188	1.25976	0.704502	-0.01917
		4.43	1.7043	1.43552	1.2549	0.707864	-0.01974
		4.43333	1.70833	1.43519	1.26216	0.706454	-0.02215
		4.43667	1.70872	1.44053	1.2571	0.708027	-0.01784
		4.44	1.7076	1.43171	1.25976	0.706441	-0.01477
		4.44333	1.70589	1.43588	1.26366	0.7087	-0.01809
		4.44667	1.70938	1.43567	1.25756	0.705031	-0.01894
		4.45	1.71164	1.43774	1.25984	0.707432	-0.01606
		4.45333	1.70666	1.4322	1.25468	0.706688	-0.01866
		4.45667	1.70616	1.43751	1.26028	0.70429	-0.02121
		4.46	1.71323	1.43874	1.25565	0.70869	-0.02167
		4.46333	1.7064	1.43895	1.2617	0.708526	-0.01931
		4.46667	1.70929	1.43897	1.26442	0.709072	-0.02186
		4.47	1.71179	1.43336	1.26343	0.711253	-0.02032
		4.47333	1.7142	1.43813	1.26145	0.706223	-0.02031
		4.47667	1.71088	1.43653	1.26435	0.71116	-0.01371
		4.48	1.71032	1.4352	1.26176	0.703783	-0.01755
		4.48333	1.7147	1.43705	1.26072	0.707128	-0.02199
		4.48667	1.70956	1.43881	1.25981	0.707039	-0.0213
		4.49	1.7125	1.43975	1.2613	0.709498	-0.01981
		4.49333	1.71666	1.43567	1.26573	0.707356	-0.01862
		4.49667	1.71361	1.43855	1.26317	0.709083	-0.0187
		4.5	1.71111	1.43803	1.26537	0.709534	-0.01529
		4.50333	1.71417	1.43891	1.2657	0.71029	-0.01955
		4.50667	1.71279	1.44087	1.26628	0.708896	-0.02131
		4.51	1.71296	1.44275	1.26134	0.704159	-0.02166
		4.51333	1.71689	1.43935	1.26274	0.709359	-0.0176
		4.51667	1.71389	1.44464	1.26257	0.709688	-0.01767
		4.52	1.71311	1.44013	1.26618	0.710601	-0.01594
		4.52333	1.71378	1.43843	1.26187	0.708026	-0.01608
		4.52667	1.71545	1.43856	1.26245	0.70931	-0.02024
		4.53	1.71281	1.44078	1.26272	0.712926	-0.02288
		4.53333	1.71437	1.43733	1.26462	0.708142	-0.01873
		4.53667	1.72123	1.43637	1.26693	0.706169	-0.01857
		4.54	1.7186	1.43987	1.26667	0.712802	-0.01923
		4.54333	1.71504	1.43977	1.26844	0.710534	-0.02535
		4.54667	1.71589	1.43733	1.2667	0.70822	-0.02102
		4.55	1.71528	1.44203	1.26311	0.708879	-0.01997
		4.55333	1.71592	1.43671	1.26652	0.707068	-0.02002
		4.55667	1.71884	1.44107	1.26486	0.707172	-0.01317
		4.56	1.72285	1.4419	1.2657	0.707598	-0.02278
		4.56333	1.71769	1.43714	1.266	0.710104	-0.01867
		4.56667	1.72083	1.44	1.27034	0.71049	-0.02099
		4.57	1.72092	1.44295	1.26709	0.709891	-0.01621
		4.57333	1.71911	1.44174	1.26589	0.708867	-0.01861
		4.57667	1.71932	1.44516	1.2668	0.70962	-0.0187
		4.58	1.72222	1.44231	1.26804	0.709978	-0.01998
		4.58333	1.72141	1.44144	1.26997	0.709886	-0.02283
		4.58667	1.71659	1.44231	1.26614	0.706716	-0.02292
		4.59	1.72082	1.4455	1.27051	0.715399	-0.02047
		4.59333	1.72327	1.44289	1.27054	0.710312	-0.01899
		4.59667	1.72319	1.4453	1.26861	0.71296	-0.02046
		4.6	1.724	1.44179	1.26575	0.707649	-0.01731
		4.60333	1.72021	1.4443	1.27033	0.710698	-0.01933
		4.60667	1.72457	1.44481	1.26741	0.710244	-0.0212
		4.61	1.71959	1.44499	1.26803	0.709902	-0.01905
		4.61333	1.72402	1.44431	1.27301	0.708024	-0.02231
		4.61667	1.729	1.44426	1.27034	0.708867	-0.02207
		4.62	1.72804	1.44294	1.27141	0.712454	-0.0191
		4.62333	1.72448	1.44357	1.2718	0.712389	-0.01964
		4.62667	1.72519	1.44469	1.2696	0.710483	-0.02277
		4.63	1.72443	1.44573	1.26867	0.713136	-0.0211
		4.63333	1.72742	1.44646	1.26878	0.710526	-0.02264
		4.63667	1.72472	1.44265	1.2701	0.712994	-0.02171
		4.64	1.72649	1.44728	1.2706	0.710851	-0.02123
		4.64333	1.72903	1.44313	1.27301	0.707139	-0.02157
		4.64667	1.73017	1.44463	1.26797	0.709076	-0.01689
		4.65	1.72974	1.44745	1.27512	0.714781	-0.01998
		4.65333	1.72914	1.44664	1.27151	0.709769	-0.01861
		4.65667	1.7279	1.44695	1.27448	0.713127	-0.02132
		4.66	1.72562	1.44944	1.26973	0.710646	-0.02015
		4.66333	1.72957	1.44653	1.2732	0.716282	-0.01527
		4.66667	1.72922	1.44739	1.27321	0.711224	-0.02158
		4.67	1.72523	1.43903	1.27503	0.712947	-0.01888
		4.67333	1.73264	1.44823	1.27201	0.715221	-0.02159
		4.67667	1.73367	1.45074	1.27206	0.711304	-0.02207
		4.68	1.73197	1.44745	1.2749	0.715003	-0.01775
		4.68333	1.73003	1.44656	1.27172	0.710787	-0.02299
		4.68667	1.72982	1.44643	1.27173	0.712276	-0.02355
		4.69	1.73019	1.44627	1.27465	0.711241	-0.02238
		4.69333	1.7296	1.45029	1.27495	0.71	-0.02087
		4.69667	1.73326	1.4495	1.27176	0.715058	-0.01822
		4.7	1.73117	1.44768	1.27938	0.709132	-0.0158
		4.70333	1.72937	1.4467	1.27463	0.716636	-0.01757
		4.70667	1.73179	1.44799	1.26637	0.71133	-0.01686
		4.71	1.73011	1.44782	1.27104	0.715879	-0.02102
		4.71333	1.73153	1.44842	1.27692	0.709997	-0.01909
		4.71667	1.72717	1.44712	1.27499	0.710545	-0.02175
		4.72	1.73437	1.44276	1.27595	0.712801	-0.01905
		4.72333	1.73448	1.44927	1.27389	0.715399	-0.02245
		4.72667	1.73467	1.45169	1.27086	0.714342	-0.02121
		4.73	1.73267	1.44963	1.27393	0.714294	-0.02448
		4.73333	1.7355	1.44786	1.26964	0.715149	-0.0195
		4.73667	1.73745	1.44695	1.27645	0.717463	-0.02213
		4.74	1.73311	1.4478	1.28162	0.710286	-0.02024
		4.74333	1.73371	1.44548	1.27196	0.710788	-0.02144
		4.74667	1.73546	1.45352	1.27746	0.716348	-0.02112
		4.75	1.73496	1.45388	1.27704	0.711838	-0.01621
		4.75333	1.73977	1.45062	1.27955	0.717177	-0.01712
		4.75667	1.73903	1.44797	1.27717	0.712382	-0.01713
		4.76	1.7351	1.45199	1.28084	0.718639	-0.02117
		4.76333	1.73678	1.45065	1.27831	0.714488	-0.0205
		4.76667	1.73489	1.44921	1.27785	0.711655	-0.01809
		4.77	1.73596	1.45209	1.27848	0.710213	-0.01833
		4.77333	1.73689	1.44974	1.27565	0.712345	-0.01962
		4.77667	1.73474	1.45134	1.27905	0.715409	-0.01693
		4.78	1.73448	1.45049	1.27496	0.712819	-0.0214
		4.78333	1.73932	1.45775	1.27886	0.718666	-0.02132
		4.78667	1.7384	1.45321	1.27922	0.717442	-0.02502
		4.79	1.73832	1.45096	1.28005	0.712537	-0.01648
		4.79333	1.7378	1.44873	1.28506	0.715018	-0.01898
		4.79667	1.73636	1.44906	1.28173	0.717147	-0.02037
		4.8	1.7368	1.45835	1.28117	0.715546	-0.01887
		4.80333	1.74523	1.45326	1.27842	0.714087	-0.01594
		4.80667	1.73806	1.45244	1.27688	0.712445	-0.01539
		4.81	1.74077	1.45486	1.28189	0.716908	-0.02016
		4.81333	1.7345	1.45464	1.28028	0.71417	-0.02326
		4.81667	1.73719	1.44944	1.28229	0.714168	-0.01834
		4.82	1.73893	1.45112	1.27858	0.715376	-0.01946
		4.82333	1.7414	1.45446	1.27967	0.712345	-0.01948
		4.82667	1.74517	1.45536	1.2866	0.714109	-0.02336
		4.83	1.743	1.44908	1.27923	0.716983	-0.01897
		4.83333	1.74203	1.45185	1.28041	0.712017	-0.02092
		4.83667	1.74461	1.45486	1.27921	0.71705	-0.01429
		4.84	1.74458	1.45484	1.27869	0.713759	-0.01984
		4.84333	1.74356	1.45657	1.28154	0.712743	-0.01826
		4.84667	1.74707	1.45657	1.28129	0.717365	-0.02349
		4.85	1.74562	1.4587	1.27904	0.718474	-0.02281
		4.85333	1.74116	1.45523	1.28208	0.720673	-0.02198
		4.85667	1.74791	1.45383	1.28535	0.72004	-0.01945
		4.86	1.75114	1.45675	1.27928	0.715769	-0.02425
		4.86333	1.73821	1.45339	1.28573	0.715709	-0.01831
		4.86667	1.74497	1.45295	1.28286	0.71393	-0.02369
		4.87	1.74403	1.45384	1.2816	0.71374	-0.02
		4.87333	1.74294	1.45393	1.28733	0.71532	-0.02196
		4.87667	1.74318	1.45788	1.28391	0.716327	-0.01923
		4.88	1.74304	1.45788	1.2837	0.719281	-0.02191
		4.88333	1.74659	1.45272	1.28527	0.715396	-0.01694
		4.88667	1.74334	1.46059	1.28689	0.713672	-0.02003
		4.89	1.74922	1.45771	1.27964	0.715745	-0.02123
		4.89333	1.74863	1.45543	1.27926	0.721096	-0.01982
		4.89667	1.74918	1.45801	1.28203	0.71628	-0.01909
		4.9	1.74512	1.46023	1.28267	0.716967	-0.02188
		4.90333	1.74969	1.45557	1.28519	0.721502	-0.01887
		4.90667	1.74425	1.46217	1.28466	0.712864	-0.01636
		4.91	1.74996	1.45364	1.28926	0.718502	-0.0193
		4.91333	1.74855	1.4549	1.28268	0.716844	-0.01801
		4.91667	1.74839	1.45802	1.28528	0.717999	-0.02206
		4.92	1.75176	1.45801	1.2841	0.719198	-0.01709
		4.92333	1.75035	1.45715	1.28737	0.713346	-0.01829
		4.92667	1.74896	1.45601	1.2857	0.720193	-0.01993
		4.93	1.74978	1.45752	1.28851	0.719339	-0.01687
		4.93333	1.74902	1.45906	1.29148	0.715754	-0.02005
		4.93667	1.75234	1.46047	1.28707	0.720505	-0.02073
		4.94	1.75576	1.45708	1.28116	0.715993	-0.02073
		4.94333	1.74722	1.46033	1.29021	0.717527	-0.0159
		4.94667	1.75157	1.45713	1.28454	0.717873	-0.01974
		4.95	1.75301	1.45874	1.29091	0.717572	-0.02208
		4.95333	1.75203	1.46016	1.28395	0.718293	-0.02167
		4.95667	1.7538	1.46033	1.2865	0.715074	-0.01928
		4.96	1.75186	1.45905	1.2905	0.717645	-0.02288
		4.96333	1.75128	1.4599	1.28642	0.716215	-0.0216
		4.96667	1.7541	1.45998	1.28833	0.719277	-0.02055
		4.97	1.75793	1.4655	1.28792	0.720437	-0.02337
		4.97333	1.75702	1.46133	1.28811	0.722092	-0.02612
		4.97667	1.75606	1.46375	1.28953	0.721109	-0.02072
		4.98	1.75325	1.46159	1.28646	0.719619	-0.0177
		4.98333	1.75415	1.46248	1.28866	0.720439	-0.01895
		4.98667	1.75615	1.46	1.28648	0.717828	-0.02368
		4.99	1.75748	1.46568	1.28751	0.717624	-0.01979
		4.99333	1.75242	1.46144	1.29055	0.714798	-0.02218
		4.99667	1.7567	1.46176	1.29003	0.719143	-0.01983
		5	1.75562	1.46239	1.29018	0.716695	-0.02367
		5.00333	1.75488	1.46419	1.29394	0.719823	-0.02121
		5.00667	1.76082	1.46526	1.28704	0.717649	-0.01923
		5.01	1.7624	1.46117	1.29015	0.718418	-0.02013
		5.01333	1.75693	1.46582	1.28995	0.718122	-0.02072
		5.01667	1.75591	1.4634	1.29075	0.723822	-0.02
		5.02	1.75841	1.46156	1.2925	0.722799	-0.02246
		5.02333	1.75785	1.46256	1.29133	0.721136	-0.02068
		5.02667	1.75489	1.4644	1.29411	0.72004	-0.02143
		5.03	1.76135	1.46455	1.29323	0.720659	-0.02048
		5.03333	1.75934	1.46704	1.2919	0.725601	-0.01653
		5.03667	1.75998	1.46067	1.2919	0.719536	-0.02259
		5.04	1.75724	1.46338	1.29558	0.718742	-0.02354
		5.04333	1.76107	1.46569	1.29067	0.71979	-0.02087
		5.04667	1.76258	1.46216	1.28733	0.721136	-0.02094
		5.05	1.75565	1.46499	1.2939	0.722793	-0.01946
		5.05333	1.76177	1.46756	1.29487	0.724508	-0.01671
		5.05667	1.7567	1.4612	1.29059	0.722585	-0.0186
		5.06	1.76294	1.46161	1.29177	0.718797	-0.0178
		5.06333	1.75931	1.46317	1.29131	0.71852	-0.01686
		5.06667	1.76124	1.46259	1.29244	0.722802	-0.01743
		5.07	1.76007	1.46679	1.29393	0.720481	-0.01814
		5.07333	1.76344	1.46598	1.29373	0.71877	-0.02489
		5.07667	1.76445	1.46689	1.29076	0.716985	-0.0202
		5.08	1.75866	1.46756	1.29147	0.720835	-0.02421
		5.08333	1.7623	1.46419	1.29779	0.724465	-0.02003
		5.08667	1.76449	1.467	1.29381	0.725871	-0.02317
		5.09	1.76359	1.46611	1.29399	0.721492	-0.01934
		5.09333	1.76225	1.46395	1.29552	0.719711	-0.0224
		5.09667	1.76633	1.46728	1.29429	0.725071	-0.02116
		5.1	1.76294	1.46444	1.2981	0.720689	-0.01717
		5.10333	1.76394	1.46928	1.29221	0.725841	-0.02573
		5.10667	1.76452	1.46846	1.2958	0.717314	-0.02243
		5.11	1.7655	1.46703	1.30102	0.722901	-0.02287
		5.11333	1.76897	1.46665	1.29211	0.722548	-0.01961
		5.11667	1.7672	1.46885	1.29802	0.716282	-0.02194
		5.12	1.76477	1.46376	1.29678	0.719086	-0.02333
		5.12333	1.76517	1.46823	1.29737	0.720828	-0.0233
		5.12667	1.76747	1.46846	1.29639	0.722527	-0.01956
		5.13	1.77083	1.46854	1.30025	0.718792	-0.025
		5.13333	1.76747	1.46729	1.29679	0.722513	-0.02125
		5.13667	1.76533	1.46863	1.29534	0.722811	-0.02294
		5.14	1.76806	1.47357	1.29883	0.720274	-0.02304
		5.14333	1.76712	1.46658	1.29719	0.722426	-0.02233
		5.14667	1.76889	1.47121	1.29874	0.726221	-0.02226
		5.15	1.76664	1.46735	1.30051	0.72188	-0.0247
		5.15333	1.7721	1.47	1.29515	0.724166	-0.02386
		5.15667	1.76828	1.46734	1.29574	0.724168	-0.01821
		5.16	1.76597	1.47061	1.29567	0.723527	-0.02259
		5.16333	1.76869	1.47039	1.29541	0.727972	-0.02187
		5.16667	1.77183	1.46814	1.30081	0.723026	-0.02278
		5.17	1.7721	1.47209	1.2986	0.72329	-0.02255
		5.17333	1.7723	1.46833	1.29867	0.722638	-0.01881
		5.17667	1.77635	1.46847	1.29819	0.724138	-0.01927
		5.18	1.77331	1.469	1.30143	0.722006	-0.02111
		5.18333	1.77296	1.468	1.29902	0.722062	-0.02271
		5.18667	1.77031	1.47393	1.30369	0.72536	-0.02101
		5.19	1.7711	1.46884	1.29918	0.724295	-0.01822
		5.19333	1.77705	1.47316	1.29879	0.723591	-0.02204
		5.19667	1.77192	1.46926	1.29548	0.727303	-0.02365
		5.2	1.77503	1.47174	1.30223	0.725377	-0.02312
		5.20333	1.77325	1.47203	1.30199	0.726806	-0.0239
		5.20667	1.77367	1.46789	1.30209	0.724107	-0.0251
		5.21	1.77369	1.47341	1.30069	0.727384	-0.02425
		5.21333	1.77563	1.46742	1.30403	0.723669	-0.02732
		5.21667	1.77349	1.47012	1.30152	0.72895	-0.02262
		5.22	1.77788	1.4731	1.30059	0.722074	-0.02331
		5.22333	1.7755	1.47466	1.30205	0.720865	-0.02265
		5.22667	1.77272	1.47118	1.304	0.72498	-0.02194
		5.23	1.76883	1.47193	1.30169	0.724591	-0.02292
		5.23333	1.77424	1.47404	1.2992	0.719804	-0.02212
		5.23667	1.77588	1.4718	1.2996	0.724805	-0.02105
		5.24	1.77274	1.47094	1.30447	0.72693	-0.01981
		5.24333	1.77496	1.46984	1.30387	0.726731	-0.02676
		5.24667	1.77924	1.47682	1.30246	0.728971	-0.0229
		5.25	1.77726	1.46885	1.30194	0.72384	-0.02036
		5.25333	1.78107	1.47881	1.30449	0.725498	-0.02329
		5.25667	1.77414	1.47154	1.30378	0.725647	-0.02271
		5.26	1.77902	1.47361	1.30557	0.726383	-0.02267
		5.26333	1.77677	1.47298	1.30478	0.722374	-0.01956
		5.26667	1.78182	1.4726	1.30842	0.725052	-0.02404
		5.27	1.78193	1.47371	1.3021	0.727119	-0.01876
		5.27333	1.77751	1.47107	1.30477	0.72768	-0.02359
		5.27667	1.77694	1.47223	1.30319	0.728934	-0.02157
		5.28	1.77989	1.47374	1.30273	0.727341	-0.01628
		5.28333	1.78007	1.4745	1.30257	0.725055	-0.02075
		5.28667	1.78171	1.47408	1.30639	0.721955	-0.02689
		5.29	1.78028	1.47191	1.30597	0.726159	-0.02483
		5.29333	1.77831	1.47864	1.30442	0.73113	-0.0205
		5.29667	1.78	1.47875	1.3034	0.725255	-0.02319
		5.3	1.7819	1.47407	1.30388	0.726145	-0.02263
		5.30333	1.78141	1.47519	1.30835	0.726717	-0.02228
		5.30667	1.78102	1.47592	1.30584	0.727016	-0.02214
		5.31	1.78397	1.47379	1.30571	0.731105	-0.02658
		5.31333	1.78334	1.47175	1.30431	0.729493	-0.01951
		5.31667	1.78323	1.47846	1.30221	0.726694	-0.02174
		5.32	1.78415	1.47421	1.30725	0.725907	-0.02404
		5.32333	1.77934	1.47793	1.30423	0.72775	-0.02279
		5.32667	1.78567	1.47552	1.30946	0.726063	-0.0235
		5.33	1.78343	1.474	1.30192	0.723368	-0.02363
		5.33333	1.78568	1.47442	1.30843	0.726085	-0.023
		5.33667	1.78259	1.47641	1.30908	0.722731	-0.02324
		5.34	1.78166	1.473	1.30538	0.723424	-0.02454
		5.34333	1.78187	1.47593	1.30768	0.73027	-0.0255
		5.34667	1.7861	1.4785	1.30618	0.72386	-0.02179
		5.35	1.78038	1.47661	1.30594	0.723164	-0.02375
		5.35333	1.78333	1.481	1.30838	0.726791	-0.02423
		5.35667	1.78165	1.48211	1.30901	0.729526	-0.02164
		5.36	1.78362	1.47708	1.30422	0.72796	-0.02668
		5.36333	1.78663	1.4787	1.30497	0.727968	-0.02265
		5.36667	1.78265	1.4771	1.3063	0.727638	-0.02318
		5.37	1.78689	1.47795	1.30685	0.730629	-0.02578
		5.37333	1.78946	1.47663	1.30855	0.731313	-0.0241
		5.37667	1.78523	1.48015	1.30692	0.724459	-0.01897
		5.38	1.78876	1.47863	1.30967	0.72846	-0.02105
		5.38333	1.79051	1.48128	1.30874	0.731427	-0.02626
		5.38667	1.78885	1.47897	1.30768	0.727049	-0.02065
		5.39	1.78984	1.47689	1.30949	0.727861	-0.02144
		5.39333	1.78719	1.47864	1.31155	0.725229	-0.02347
		5.39667	1.78715	1.47819	1.30815	0.726978	-0.02215
		5.4	1.78886	1.47821	1.30658	0.728116	-0.02315
		5.40333	1.78932	1.47913	1.31019	0.729423	-0.01874
		5.40667	1.78855	1.47875	1.30974	0.727393	-0.02251
		5.41	1.79203	1.48262	1.31195	0.729927	-0.02323
		5.41333	1.79459	1.47537	1.31099	0.724928	-0.02847
		5.41667	1.79081	1.47873	1.31058	0.727612	-0.0204
		5.42	1.79074	1.47915	1.30871	0.728781	-0.02481
		5.42333	1.78881	1.48036	1.30839	0.728501	-0.02395
		5.42667	1.79063	1.48022	1.30903	0.730371	-0.02064
		5.43	1.78985	1.48291	1.30813	0.731123	-0.02629
		5.43333	1.7858	1.48118	1.30966	0.730942	-0.0217
		5.43667	1.79468	1.47915	1.31009	0.730945	-0.02055
		5.44	1.79196	1.48082	1.30895	0.73118	-0.02017
		5.44333	1.79223	1.48041	1.31374	0.725654	-0.02167
		5.44667	1.79366	1.47996	1.31142	0.727263	-0.02355
		5.45	1.79143	1.47947	1.307	0.728744	-0.0239
		5.45333	1.79095	1.48215	1.30904	0.728929	-0.02505
		5.45667	1.78947	1.47862	1.3078	0.730495	-0.02224
		5.46	1.79461	1.48294	1.31055	0.72938	-0.02716
		5.46333	1.79271	1.48136	1.30805	0.73135	-0.02446
		5.46667	1.79228	1.47924	1.31441	0.731343	-0.02537
		5.47	1.79157	1.48153	1.31435	0.731985	-0.02384
		5.47333	1.79316	1.48008	1.31007	0.731971	-0.02352
		5.47667	1.79541	1.47904	1.31296	0.733047	-0.02021
		5.48	1.79377	1.4866	1.31238	0.728148	-0.02344
		5.48333	1.79345	1.48413	1.31113	0.729356	-0.02505
		5.48667	1.79504	1.48324	1.31434	0.731721	-0.02813
		5.49	1.80019	1.47835	1.31332	0.731043	-0.02409
		5.49333	1.79798	1.48155	1.31435	0.731147	-0.0231
		5.49667	1.79979	1.48521	1.3145	0.72809	-0.0199
		5.5	1.79772	1.48473	1.31474	0.731134	-0.02473
		5.50333	1.79478	1.48289	1.31389	0.733933	-0.02445
		5.50667	1.79905	1.48236	1.31067	0.731473	-0.02054
		5.51	1.79852	1.48342	1.31411	0.730507	-0.02387
		5.51333	1.79429	1.4852	1.31083	0.730999	-0.02205
		5.51667	1.79908	1.48057	1.31619	0.726236	-0.02146
		5.52	1.79866	1.4893	1.3196	0.728892	-0.02183
		5.52333	1.79914	1.48584	1.31463	0.728884	-0.02189
		5.52667	1.79717	1.4875	1.31361	0.734646	-0.02139
		5.53	1.79965	1.4813	1.31459	0.733128	-0.02416
		5.53333	1.79526	1.48448	1.3224	0.730346	-0.02034
		5.53667	1.8028	1.48411	1.31234	0.728827	-0.02912
		5.54	1.79934	1.48056	1.31146	0.72983	-0.01989
		5.54333	1.79786	1.48223	1.31266	0.731509	-0.02409
		5.54667	1.79933	1.48141	1.31625	0.73204	-0.02209
		5.55	1.80066	1.48401	1.31564	0.733985	-0.02519
		5.55333	1.79899	1.48441	1.31814	0.72919	-0.02372
		5.55667	1.79924	1.48238	1.31195	0.730383	-0.02683
		5.56	1.80064	1.49044	1.3147	0.735329	-0.02481
		5.56333	1.80205	1.48646	1.3107	0.728549	-0.0224
		5.56667	1.8034	1.48442	1.31984	0.734446	-0.02041
		5.57	1.79785	1.48931	1.31888	0.730721	-0.02235
		5.57333	1.8033	1.48235	1.31818	0.733616	-0.02385
		5.57667	1.80276	1.48765	1.31556	0.731592	-0.02149
		5.58	1.79975	1.48524	1.32186	0.731269	-0.0251
		5.58333	1.80403	1.48611	1.31979	0.729735	-0.02344
		5.58667	1.80249	1.49032	1.31622	0.73022	-0.02193
		5.59	1.80521	1.48507	1.3248	0.734869	-0.02384
		5.59333	1.80487	1.48885	1.31753	0.731101	-0.02411
		5.59667	1.8057	1.48915	1.3197	0.728791	-0.02478
		5.6	1.80383	1.49045	1.32034	0.735991	-0.02375
		5.60333	1.80769	1.48558	1.3177	0.727752	-0.0177
		5.60667	1.80223	1.48723	1.32007	0.730752	-0.02494
		5.61	1.80484	1.48536	1.3199	0.735202	-0.02315
		5.61333	1.80682	1.49218	1.31863	0.732857	-0.02941
		5.61667	1.81143	1.48479	1.31526	0.733079	-0.02556
		5.62	1.80679	1.4887	1.31644	0.730365	-0.02235
		5.62333	1.80553	1.48752	1.31609	0.73386	-0.02032
		5.62667	1.80635	1.48686	1.31823	0.731576	-0.02749
		5.63	1.80361	1.48836	1.31699	0.730995	-0.02524
		5.63333	1.80139	1.48036	1.3234	0.736965	-0.02491
		5.63667	1.80691	1.48712	1.31816	0.731471	-0.02742
		5.64	1.80584	1.48873	1.31679	0.736044	-0.02363
		5.64333	1.80978	1.48767	1.32011	0.734061	-0.02429
		5.64667	1.80703	1.48789	1.31794	0.732524	-0.0186
		5.65	1.80926	1.48836	1.32198	0.736014	-0.02453
		5.65333	1.80838	1.48835	1.31974	0.73477	-0.02133
		5.65667	1.81051	1.48999	1.32095	0.734153	-0.02403
		5.66	1.81267	1.48688	1.31507	0.731329	-0.023
		5.66333	1.80771	1.4909	1.32269	0.735704	-0.02729
		5.66667	1.80979	1.4903	1.32354	0.733319	-0.02206
		5.67	1.80924	1.48985	1.32083	0.736076	-0.02479
		5.67333	1.80788	1.49254	1.31953	0.73034	-0.02329
		5.67667	1.80862	1.49002	1.32076	0.731004	-0.02851
		5.68	1.8073	1.48954	1.3245	0.73156	-0.02498
		5.68333	1.81231	1.49443	1.32274	0.733312	-0.02388
		5.68667	1.80903	1.49016	1.32207	0.732284	-0.02257
		5.69	1.81398	1.48722	1.32091	0.73457	-0.026
		5.69333	1.81214	1.49225	1.3251	0.73672	-0.02132
		5.69667	1.81068	1.49079	1.32236	0.734599	-0.02447
		5.7	1.80854	1.48612	1.31946	0.73269	-0.02198
		5.70333	1.80767	1.48859	1.32031	0.735531	-0.01978
		5.70667	1.80819	1.48959	1.3201	0.732148	-0.02665
		5.71	1.81357	1.4824	1.31986	0.732746	-0.02235
		5.71333	1.8134	1.48548	1.32012	0.735649	-0.02219
		5.71667	1.81632	1.49871	1.32207	0.733445	-0.02353
		5.72	1.81429	1.4904	1.32768	0.732252	-0.02328
		5.72333	1.81437	1.48859	1.32577	0.735349	-0.02152
		5.72667	1.81517	1.49575	1.32441	0.734734	-0.02294
		5.73	1.81201	1.49344	1.32468	0.73216	-0.02475
		5.73333	1.81303	1.491	1.32037	0.728858	-0.02366
		5.73667	1.81866	1.49221	1.32779	0.734373	-0.02278
		5.74	1.81439	1.4915	1.3269	0.731816	-0.02877
		5.74333	1.81306	1.49314	1.32003	0.731435	-0.02664
		5.74667	1.81097	1.49396	1.32689	0.729769	-0.02155
		5.75	1.81118	1.49196	1.32159	0.735436	-0.02462
		5.75333	1.81467	1.49105	1.32507	0.732073	-0.02326
		5.75667	1.8115	1.49138	1.32438	0.736107	-0.0213
		5.76	1.81625	1.49252	1.32694	0.733273	-0.01872
		5.76333	1.81151	1.49379	1.32641	0.734948	-0.02885
		5.76667	1.81763	1.49262	1.32805	0.730758	-0.02479
		5.77	1.81532	1.49501	1.32411	0.73525	-0.02677
		5.77333	1.81904	1.49064	1.32949	0.73007	-0.0243
		5.77667	1.8113	1.49207	1.32465	0.738072	-0.02677
		5.78	1.81568	1.49448	1.3269	0.731357	-0.02595
		5.78333	1.81705	1.48918	1.32349	0.731744	-0.02326
		5.78667	1.81291	1.49273	1.32996	0.732614	-0.02662
		5.79	1.81649	1.49043	1.32919	0.735435	-0.024
		5.79333	1.81656	1.49278	1.32433	0.735651	-0.02455
		5.79667	1.81919	1.49173	1.32598	0.73902	-0.01847
		5.8	1.81565	1.49664	1.3258	0.738932	-0.02427
		5.80333	1.81667	1.49411	1.32302	0.739011	-0.02078
		5.80667	1.81855	1.49382	1.32372	0.735718	-0.02472
		5.81	1.81872	1.49258	1.32809	0.73165	-0.02503
		5.81333	1.81866	1.49407	1.32601	0.733555	-0.02716
		5.81667	1.81672	1.48891	1.33035	0.734593	-0.02501
		5.82	1.82652	1.49524	1.32669	0.734148	-0.02382
		5.82333	1.82075	1.49426	1.32839	0.739702	-0.0205
		5.82667	1.82193	1.4953	1.32918	0.736463	-0.02161
		5.83	1.82598	1.49799	1.3284	0.735418	-0.02349
		5.83333	1.82309	1.49426	1.32701	0.736403	-0.0282
		5.83667	1.82447	1.49331	1.33019	0.734196	-0.02484
		5.84	1.82187	1.49317	1.32719	0.73401	-0.02536
		5.84333	1.82219	1.4942	1.33237	0.738489	-0.02231
		5.84667	1.82161	1.49769	1.32606	0.741829	-0.02324
		5.85	1.82424	1.49813	1.32677	0.735915	-0.02612
		5.85333	1.82273	1.49568	1.33225	0.733502	-0.02107
		5.85667	1.82041	1.49658	1.32909	0.736933	-0.02394
		5.86	1.82394	1.49946	1.32859	0.73772	-0.02243
		5.86333	1.82293	1.49955	1.32827	0.737488	-0.02573
		5.86667	1.82388	1.49479	1.33059	0.73193	-0.02542
		5.87	1.82372	1.4956	1.32818	0.738544	-0.0248
		5.87333	1.8242	1.49909	1.33073	0.733859	-0.02507
		5.87667	1.82139	1.49368	1.32642	0.737233	-0.02234
		5.88	1.82467	1.49612	1.32898	0.73543	-0.02491
		5.88333	1.82221	1.49899	1.32927	0.735085	-0.01995
		5.88667	1.82397	1.50018	1.32918	0.734746	-0.02668
		5.89	1.82883	1.49341	1.33475	0.739669	-0.02705
		5.89333	1.82378	1.49415	1.32795	0.737296	-0.02805
		5.89667	1.82534	1.4978	1.32731	0.733984	-0.02916
		5.9	1.82431	1.49876	1.33013	0.737996	-0.02305
		5.90333	1.8244	1.49706	1.33383	0.742937	-0.02171
		5.90667	1.82269	1.49885	1.32687	0.736223	-0.02537
		5.91	1.82688	1.49884	1.32952	0.735647	-0.0206
		5.91333	1.8262	1.49733	1.33011	0.736318	-0.0215
		5.91667	1.82582	1.50198	1.33127	0.741554	-0.02326
		5.92	1.83054	1.49839	1.3329	0.736139	-0.02299
		5.92333	1.82652	1.49692	1.33228	0.738032	-0.02421
		5.92667	1.82576	1.49929	1.33427	0.733696	-0.02787
		5.93	1.82715	1.49401	1.33204	0.737431	-0.02439
		5.93333	1.82765	1.4937	1.33321	0.744736	-0.02548
		5.93667	1.82721	1.5003	1.33213	0.735992	-0.02616
		5.94	1.82932	1.49726	1.33107	0.740007	-0.0232
		5.94333	1.8295	1.49598	1.334	0.736483	-0.02042
		5.94667	1.82984	1.49539	1.33511	0.735409	-0.02149
		5.95	1.83075	1.49696	1.33403	0.736558	-0.02539
		5.95333	1.82861	1.49533	1.33275	0.741579	-0.02597
		5.95667	1.83037	1.50258	1.33293	0.736018	-0.02532
		5.96	1.83362	1.50036	1.33346	0.733356	-0.0271
		5.96333	1.82977	1.4962	1.33421	0.736598	-0.02341
		5.96667	1.82875	1.50128	1.33311	0.741515	-0.02632
		5.97	1.83043	1.50198	1.33559	0.739028	-0.02724
		5.97333	1.82731	1.49973	1.33279	0.743075	-0.02111
		5.97667	1.83028	1.50108	1.33283	0.733937	-0.02628
		5.98	1.83452	1.49999	1.33159	0.737004	-0.02456
		5.98333	1.83339	1.5011	1.33103	0.738357	-0.02681
		5.98667	1.83032	1.49853	1.33663	0.734838	-0.02545
		5.99	1.83397	1.50302	1.33935	0.736971	-0.02651
		5.99333	1.83538	1.49829	1.3332	0.733983	-0.02377
		5.99667	1.83399	1.50151	1.33439	0.740008	-0.025
		6	1.83351	1.5039	1.33448	0.74122	-0.02709
		6.00333	1.83596	1.49858	1.33184	0.736544	-0.02671
		6.00667	1.82951	1.50023	1.33114	0.736072	-0.02727
		6.01	1.83018	1.50057	1.33241	0.741455	-0.02844
		6.01333	1.83419	1.49963	1.33411	0.736317	-0.02681
		6.01667	1.83269	1.49916	1.33428	0.737806	-0.02323
		6.02	1.83366	1.50137	1.33742	0.739463	-0.0248
		6.02333	1.83326	1.50296	1.33027	0.741215	-0.02771
		6.02667	1.83303	1.50134	1.33642	0.743093	-0.02446
		6.03	1.8359	1.50095	1.33419	0.736237	-0.02592
		6.03333	1.83382	1.50026	1.33587	0.739787	-0.02098
		6.03667	1.83249	1.50375	1.33725	0.740011	-0.02371
		6.04	1.83485	1.50318	1.33708	0.740822	-0.0237
		6.04333	1.8335	1.50403	1.34011	0.738734	-0.02863
		6.04667	1.83689	1.50425	1.33904	0.734657	-0.02319
		6.05	1.84088	1.50388	1.33766	0.738449	-0.0275
		6.05333	1.83395	1.50519	1.33469	0.737507	-0.02699
		6.05667	1.83703	1.50412	1.33887	0.736185	-0.02249
		6.06	1.83712	1.50302	1.33228	0.736253	-0.02382
		6.06333	1.83999	1.50726	1.33733	0.74244	-0.02141
		6.06667	1.8365	1.50115	1.33965	0.735411	-0.02429
		6.07	1.83615	1.5006	1.3356	0.740777	-0.02651
		6.07333	1.83327	1.50536	1.33547	0.735307	-0.02191
		6.07667	1.83618	1.5067	1.33192	0.741398	-0.02959
		6.08	1.84081	1.50501	1.33585	0.736128	-0.02216
		6.08333	1.83609	1.50356	1.33916	0.742886	-0.021
		6.08667	1.83866	1.50343	1.33993	0.741106	-0.02543
		6.09	1.83658	1.50093	1.33628	0.740345	-0.02491
		6.09333	1.83831	1.5067	1.33596	0.739704	-0.0298
		6.09667	1.84084	1.50221	1.3407	0.73898	-0.02655
		6.1	1.8421	1.50228	1.33858	0.740022	-0.02608
		6.10333	1.83538	1.50745	1.33902	0.734861	-0.02739
		6.10667	1.84085	1.5073	1.33658	0.737889	-0.02621
		6.11	1.83857	1.50182	1.3382	0.738389	-0.02979
		6.11333	1.84145	1.50456	1.34071	0.739031	-0.02286
		6.11667	1.84361	1.50472	1.33878	0.737889	-0.0291
		6.12	1.84228	1.50489	1.34045	0.743514	-0.03158
		6.12333	1.83621	1.5044	1.34186	0.742918	-0.02719
		6.12667	1.84479	1.5051	1.33637	0.741907	-0.02511
		6.13	1.84224	1.50553	1.33886	0.742186	-0.03079
		6.13333	1.84025	1.50608	1.33953	0.73901	-0.02534
		6.13667	1.84227	1.50232	1.3385	0.737955	-0.02612
		6.14	1.843	1.50422	1.3378	0.742633	-0.02683
		6.14333	1.84245	1.50554	1.3387	0.74138	-0.02825
		6.14667	1.8384	1.50873	1.33858	0.742873	-0.02891
		6.15	1.84276	1.50736	1.34116	0.737255	-0.02669
		6.15333	1.83962	1.50408	1.34143	0.742521	-0.02618
		6.15667	1.84624	1.50686	1.34309	0.739028	-0.03
		6.16	1.842	1.50642	1.33968	0.737935	-0.02611
		6.16333	1.84346	1.50518	1.34861	0.741919	-0.02344
		6.16667	1.84155	1.50374	1.34019	0.741039	-0.02822
		6.17	1.84594	1.50539	1.34145	0.741535	-0.03417
		6.17333	1.84509	1.50787	1.34218	0.741774	-0.02655
		6.17667	1.84184	1.5042	1.34471	0.742864	-0.02603
		6.18	1.84292	1.50588	1.34054	0.743289	-0.027
		6.18333	1.84253	1.50548	1.34531	0.740408	-0.0269
		6.18667	1.84515	1.50545	1.34425	0.741116	-0.02871
		6.19	1.84318	1.50462	1.34718	0.739394	-0.02464
		6.19333	1.84689	1.50856	1.3465	0.742414	-0.03019
		6.19667	1.84716	1.50595	1.34035	0.736851	-0.02824
		6.2	1.85034	1.50739	1.34557	0.738267	-0.02728
		6.20333	1.84747	1.51079	1.33762	0.740189	-0.02857
		6.20667	1.84406	1.50619	1.3456	0.738265	-0.02708
		6.21	1.85156	1.50587	1.34255	0.745437	-0.0297
		6.21333	1.84777	1.50696	1.34506	0.740925	-0.0246
		6.21667	1.84607	1.50933	1.34508	0.739244	-0.02348
		6.22	1.84949	1.50797	1.34388	0.740965	-0.02811
		6.22333	1.84562	1.50651	1.34286	0.741325	-0.02522
		6.22667	1.85105	1.50533	1.34431	0.74386	-0.02987
		6.23	1.84622	1.50856	1.34832	0.74346	-0.03078
		6.23333	1.84684	1.51113	1.34456	0.742258	-0.02531
		6.23667	1.84706	1.50608	1.34395	0.740307	-0.02895
		6.24	1.84729	1.50856	1.34537	0.744526	-0.02657
		6.24333	1.85278	1.50909	1.34349	0.745459	-0.02642
		6.24667	1.84223	1.50697	1.34379	0.742473	-0.02392
		6.25	1.84969	1.50998	1.34348	0.741259	-0.02733
		6.25333	1.85082	1.50841	1.34362	0.747426	-0.02663
		6.25667	1.84615	1.51119	1.34702	0.741376	-0.02843
		6.26	1.84833	1.50678	1.34773	0.742288	-0.03007
		6.26333	1.85068	1.50996	1.34462	0.745118	-0.02644
		6.26667	1.85262	1.51122	1.34447	0.745437	-0.02905
		6.27	1.85316	1.50908	1.34737	0.747051	-0.02728
		6.27333	1.84736	1.51204	1.34448	0.744202	-0.03009
		6.27667	1.8483	1.50724	1.34643	0.746041	-0.02598
		6.28	1.84817	1.51301	1.34703	0.740919	-0.02718
		6.28333	1.84952	1.50805	1.34883	0.742714	-0.02676
		6.28667	1.85469	1.51183	1.34546	0.744233	-0.02327
		6.29	1.85325	1.51072	1.34126	0.743346	-0.02764
		6.29333	1.85214	1.513	1.34519	0.748928	-0.02764
		6.29667	1.85174	1.51455	1.34757	0.741914	-0.02567
		6.3	1.85778	1.51284	1.35308	0.744566	-0.03116
		6.30333	1.85118	1.51309	1.34131	0.741837	-0.03024
		6.30667	1.85489	1.51117	1.34368	0.745115	-0.02923
		6.31	1.85212	1.51255	1.34363	0.742173	-0.0271
		6.31333	1.85357	1.51105	1.34626	0.744619	-0.02875
		6.31667	1.85025	1.51067	1.3502	0.744001	-0.02599
		6.32	1.8553	1.5127	1.34735	0.740382	-0.02709
		6.32333	1.85428	1.51027	1.34996	0.74287	-0.02864
		6.32667	1.85572	1.51267	1.34257	0.74316	-0.0281
		6.33	1.85345	1.50827	1.35309	0.747173	-0.02697
		6.33333	1.8554	1.51842	1.35294	0.745636	-0.02623
		6.33667	1.85332	1.50842	1.34583	0.744474	-0.02805
		6.34	1.85734	1.5105	1.34674	0.746148	-0.02515
		6.34333	1.85223	1.51265	1.34901	0.743266	-0.02914
		6.34667	1.8564	1.51028	1.34998	0.744424	-0.02879
		6.35	1.85658	1.51091	1.351	0.740567	-0.0309
		6.35333	1.85255	1.51485	1.34684	0.743739	-0.02756
		6.35667	1.85766	1.51195	1.34374	0.741392	-0.02823
		6.36	1.85634	1.51041	1.35383	0.743163	-0.02911
		6.36333	1.85878	1.50851	1.34552	0.745838	-0.03058
		6.36667	1.85844	1.51228	1.34909	0.742	-0.02289
		6.37	1.85623	1.51413	1.34878	0.743992	-0.03209
		6.37333	1.85621	1.5152	1.34823	0.74376	-0.0283
		6.37667	1.85519	1.51604	1.34755	0.742505	-0.0293
		6.38	1.85952	1.51272	1.34931	0.742565	-0.03009
		6.38333	1.85931	1.51642	1.34906	0.743904	-0.02763
		6.38667	1.85704	1.51557	1.35281	0.743722	-0.0302
		6.39	1.85698	1.51269	1.34901	0.744524	-0.02748
		6.39333	1.85899	1.51624	1.34574	0.741553	-0.02676
		6.39667	1.85986	1.51852	1.35212	0.74586	-0.02947
		6.4	1.85973	1.51416	1.35213	0.742103	-0.02659
		6.40333	1.86069	1.5177	1.34795	0.741766	-0.02839
		6.40667	1.85974	1.50999	1.34617	0.740515	-0.0254
		6.41	1.86232	1.51548	1.35223	0.743679	-0.0285
		6.41333	1.85896	1.51405	1.35454	0.743356	-0.03029
		6.41667	1.85807	1.51574	1.34932	0.746591	-0.02989
		6.42	1.85669	1.51471	1.35467	0.740967	-0.02623
		6.42333	1.86602	1.51066	1.3523	0.745978	-0.03222
		6.42667	1.86185	1.51727	1.34634	0.746313	-0.02982
		6.43	1.8627	1.51555	1.35164	0.747393	-0.02879
		6.43333	1.85656	1.5128	1.35091	0.746538	-0.02704
		6.43667	1.86189	1.51043	1.34721	0.746611	-0.02609
		6.44	1.86016	1.51859	1.34893	0.743294	-0.03165
		6.44333	1.86286	1.52224	1.3495	0.747478	-0.03281
		6.44667	1.85843	1.51428	1.35288	0.744485	-0.02816
		6.45	1.86186	1.51645	1.35571	0.74785	-0.0291
		6.45333	1.86216	1.519	1.35458	0.748226	-0.02821
		6.45667	1.86307	1.51643	1.35522	0.744836	-0.0288
		6.46	1.86178	1.51733	1.35151	0.744229	-0.02978
		6.46333	1.86457	1.51645	1.35296	0.742839	-0.02835
		6.46667	1.86689	1.52043	1.35708	0.746792	-0.02846
		6.47	1.86069	1.51596	1.3571	0.745355	-0.02653
		6.47333	1.86483	1.51838	1.35427	0.742145	-0.0307
		6.47667	1.86474	1.51587	1.34991	0.743525	-0.02791
		6.48	1.86703	1.5192	1.35321	0.749749	-0.02984
		6.48333	1.86328	1.51763	1.35504	0.750303	-0.03122
		6.48667	1.86388	1.51999	1.35442	0.744954	-0.02734
		6.49	1.86535	1.51628	1.35272	0.747617	-0.03332
		6.49333	1.86435	1.51608	1.35149	0.748876	-0.03084
		6.49667	1.86476	1.51573	1.35588	0.750627	-0.02926
		6.5	1.86648	1.51559	1.35623	0.746714	-0.03068
		6.50333	1.86304	1.52229	1.35712	0.746942	-0.0262
		6.50667	1.86716	1.52221	1.35032	0.747305	-0.03046
		6.51	1.86267	1.52126	1.35634	0.747855	-0.02624
		6.51333	1.86606	1.51743	1.35163	0.74795	-0.02764
		6.51667	1.86684	1.51681	1.35383	0.745537	-0.02835
		6.52	1.8627	1.51761	1.35277	0.746784	-0.02727
		6.52333	1.86848	1.5188	1.35657	0.748552	-0.02656
		6.52667	1.86841	1.51995	1.35557	0.745495	-0.02978
		6.53	1.86773	1.51788	1.35592	0.746233	-0.02673
		6.53333	1.8665	1.52245	1.35214	0.745099	-0.02745
		6.53667	1.86894	1.51739	1.35764	0.748859	-0.02891
		6.54	1.86759	1.51903	1.35577	0.74621	-0.03018
		6.54333	1.86961	1.52007	1.3544	0.744801	-0.02817
		6.54667	1.86753	1.51894	1.3574	0.747323	-0.02905
		6.55	1.86748	1.523	1.35576	0.745881	-0.02806
		6.55333	1.87215	1.52134	1.35573	0.74683	-0.03021
		6.55667	1.86828	1.51826	1.35198	0.748687	-0.028
		6.56	1.86907	1.52338	1.35459	0.748884	-0.02924
		6.56333	1.87025	1.52544	1.3551	0.746924	-0.02634
		6.56667	1.87044	1.52197	1.35655	0.746319	-0.02719
		6.57	1.86721	1.52199	1.35974	0.746419	-0.03062
		6.57333	1.87321	1.52119	1.35517	0.7479	-0.03029
		6.57667	1.87213	1.51767	1.35886	0.75035	-0.03329
		6.58	1.87228	1.51952	1.3602	0.747015	-0.03164
		6.58333	1.87044	1.52202	1.35185	0.743911	-0.02794
		6.58667	1.87098	1.52429	1.3563	0.747837	-0.0338
		6.59	1.87398	1.52093	1.35472	0.745617	-0.02855
		6.59333	1.87047	1.52062	1.35747	0.748646	-0.03158
		6.59667	1.87207	1.52075	1.35705	0.744739	-0.02954
		6.6	1.87075	1.52159	1.36074	0.748537	-0.02849
		6.60333	1.86918	1.52445	1.35479	0.746636	-0.02791
		6.60667	1.87209	1.52187	1.35854	0.749286	-0.02755
		6.61	1.87185	1.52033	1.36056	0.745971	-0.03228
		6.61333	1.86871	1.52492	1.35406	0.745851	-0.02929
		6.61667	1.87299	1.52415	1.35673	0.748979	-0.02824
		6.62	1.87123	1.5208	1.36001	0.753763	-0.02868
		6.62333	1.8721	1.52213	1.36008	0.746529	-0.02427
		6.62667	1.87417	1.52225	1.35848	0.746127	-0.02999
		6.63	1.8715	1.52415	1.35944	0.752396	-0.03366
		6.63333	1.87019	1.5253	1.36018	0.748094	-0.03116
		6.63667	1.8732	1.51974	1.35727	0.752805	-0.02745
		6.64	1.87375	1.5258	1.36176	0.746458	-0.02996
		6.64333	1.87705	1.52155	1.36063	0.747979	-0.02616
		6.64667	1.8737	1.52394	1.36179	0.746027	-0.03253
		6.65	1.87196	1.51964	1.35831	0.745892	-0.02682
		6.65333	1.87588	1.52099	1.35928	0.744687	-0.02812
		6.65667	1.8757	1.52109	1.3584	0.749348	-0.02717
[truncated: 34,302 more rows]
