# Supplementary material for: Evolution towards simplicity in bacterial small heat shock protein system
Source: eLife. 2023 Dec 8;12:RP89813. doi: 10.7554/eLife.89813 (PMC10708888; doi:10.7554/eLife.89813)
Supplement: Figure 3—source data 3. [file elife-89813-fig3-data3.xlsx]

## Sheet: Arkusz1
	Luciferase activity (repeat 1)
time [min]	0	10	20	30	45	60	90	120	150
No sHsp	49895	1956084	7677070	8277026	15090994	20695370	26680012	30371040	39300744
AncA0	92314	1792414	3095180	4124124	5732452	7135769	8087499	9201110	9858271
AncA1	60594	1691626	5641436	10610532	24078836	35840408	51749240	60601336	67347676
IbpA E. coli	70632	1717556	6.06886e+06	10643116	17824634	33305418	40561200	52684784	59080648
Ibpa E. amylovora	105842	2392939	11035620	25070164	52862352	69907216	94934176	81979152	95394608
IbpA + IbpB E. coli	78812	4704009	18175238	36690360	64099816	81645776	81417136	89082832	86132304
	Luciferase activity (repeat 2)
time [min]	0	10	20	30	45	60	90	120	150
No sHsp	39769	1992828	6622370	9213194	14437493	18688540	25131304	38359940	39485306
AncA0	88785	1674361	2669170	3744864	5599617	6676816	7780857	10077687	10217439
AncA1	69241	1414643	5587505	10021670	20898996	26884302	43390268	59276848	61270228
IbpA E. coli	65115	1520264	4990532	11683728	20460026	27824566	47809080	62472520	63100224
Ibpa E. amylovora	73929	3004178	11104123	25012020	45715232	79145200	105935784	118388872	102664892
IbpA + IbpB E. coli	69065	5966488	15427996	36705868	66722036	81960264	107065072	108127368	117581856
	Luciferase activity (repeat 1)
time [min]	0	10	20	30	45	60	90	120	150
No sHsp	58336	1549536	5017797	8368993	12975658	17390416	24634678	25938256	30924118
AncA0	108783	902346	2042353	3382005	5642792	7421256	9588532	12344599	13288968
AncA1	122024	1417355	6578529	11787009	19473636	24847626	38822752	49970356	51054296
IbpA E. coli	79973	1295461	5239331	8339384	17878972	25889096	35448564	45105956	46554328
Ibpa E. amylovora	114557	2283853	12669702	30607858	58976904	77585752	94237736	110466992	92993536
IbpA + IbpB E. coli	83418	5456624	18771500	39084204	68944912	88620064	115765168	108988936	119725792
native	123623314
