# Supplementary material for: Evolution towards simplicity in bacterial small heat shock protein system
Source: eLife. 2023 Dec 8;12:RP89813. doi: 10.7554/eLife.89813 (PMC10708888; doi:10.7554/eLife.89813)
Supplement: Figure 4—figure supplement 2—source data 2. [file elife-89813-fig4-figsupp2-data2.xlsx]

## Sheet: Arkusz1
sHsp concentration [M]	AncA0 + 7		AncA0 Q66H G109D		AncA1 H66Q D109G
	Mean hydrodynamic diameter [nm]	SD	Mean hydrodynamic diameter [nm]	SD	Mean hydrodynamic diameter [nm]	SD
0	2082	1023	2335	1177	2058	1038
1	1709	804.3	1728	778.4	831.2	417.2
2	1337	628	1180	613.9	87.7	40.24
3	579.7	361	431.3	278.7	45.76	21.4
5	233.9	122.1	98.31	44.26	62.15	30.93
7.5	169.2	81.1	77.4	36.58	45.11	24.8
10	145.7	68.02	71.74	32.9	44.24	26.52
