# Supplementary material for: Evolution towards simplicity in bacterial small heat shock protein system
Source: eLife. 2023 Dec 8;12:RP89813. doi: 10.7554/eLife.89813 (PMC10708888; doi:10.7554/eLife.89813)
Supplement: Figure 4—source data 1. [file elife-89813-fig4-data1.xlsx]

## Sheet: Arkusz1
	Luciferase activity (repeat 1)	Luciferase activity (repeat 2)	Luciferase activity (repeat 3)
No sHsp	1.01455e+07	14018513	18921762
AncA0	5078788	4336936	7.67704e+06
AncA1	21706800	1.91091e+07	55406914
AncA0 7mut	30748452	26030416	78259036
AncA0 + 7 T50A	20858670	1.57634e+07	53638282
AncA0 + 7 H66Q	11814601	10353755	35521712
AncA0 + 7 R73K	23858373	15934090	62542906
AncA0 + 7 E78G	23983121	23387211	78996120
AncA0 + 7 D109G	8582904	7.32137e+06	29315723
AncA0 + 7 R111N	1.8326e+07	16138623	3.72357e+07
AncA0 +7 L137N	18934085	13392223	3.68714e+07
native	81588284	80548696	146719760
