# Supplementary material for: Evolution towards simplicity in bacterial small heat shock protein system
Source: eLife. 2023 Dec 8;12:RP89813. doi: 10.7554/eLife.89813 (PMC10708888; doi:10.7554/eLife.89813)
Supplement: Figure 4—source data 2. [file elife-89813-fig4-data2.xlsx]

## Sheet: Arkusz1
	luciferase activity (repeat 1)	luciferase activity (repeat 2)	luciferase activity (repeat 3)	luciferase activity (repeat 4)	luciferase activity (repeat 5)	luciferase activity (repeat 6)
No sHsp	1.65858e+07	1.48434e+07	11765666	26108106	19090681	16195983
AncA0	13001155	8.37516e+06	1.19808e+07	8372910	3912537	2.14733e+06
AncA1	34736272	25629333	33146567	59912084	47176448	2.7815e+07
AncA0 Q66H	13124765	1.33477e+07	1.03302e+07	N/A	N/A	N/A
AncA0 G109D	10843809	13866111	9546415	N/A	N/A	N/A
AncA0 Q66H G109D	39329356	26484563	29842175	N/A	N/A	N/A
AncA1 H66Q D109G	N/A	N/A	N/A	8122482	4694335	3.27211e+06
native	80479304	64215800	61310392	134001800	114681300	94189412
