# Supplementary material for: Evolution towards simplicity in bacterial small heat shock protein system
Source: eLife. 2023 Dec 8;12:RP89813. doi: 10.7554/eLife.89813 (PMC10708888; doi:10.7554/eLife.89813)
Supplement: Figure 5—figure supplement 4—source data 2. [file elife-89813-fig5-figsupp4-data2.xlsx]

## Sheet: Arkusz1
		AncA0	maximum of the dominant peak of hydrodynamic diameter distribution by volume [nm]
		temperature [C deg.]	repeat 1	repeat 2	repeat 3
		25	24.36	21.04	19.605
		27	21.04	18.17	21.04
		29	21.04	21.04	15.69
		31	18.17	18.17	21.04
		33	18.17	18.17	18.17
		35	15.69	15.69	18.17
		37	15.69	15.69	15.59
		39	15.69	15.69	15.69
		41	15.69	13.54	15.69
		43	13.54	13.54	13.54
		45	13.54	13.54	11.7
		AncA0 Q66H G109D	maximum of the dominant peak of hydrodynamic diameter distribution by volume [nm]
		temparature [ C deg.]	repeat 1	repeat 2	repeat 3
		25	24.36	24.36	24.36
		27	21.04	21.04	24.36
		29	21.04	21.04	18.17
		31	18.17	21.04	18.17
		33	18.17	18.17	15.69
		35	15.69	15.69	15.69
		37	15.69	15.69	13.54
		39	13.54	13.54	11.7
		41	11.7	12.62	11.7
		43	11.7	11.7	10.1
		45	10.1	10.1	9.41
