# Supplementary material for: Evolution towards simplicity in bacterial small heat shock protein system
Source: eLife. 2023 Dec 8;12:RP89813. doi: 10.7554/eLife.89813 (PMC10708888; doi:10.7554/eLife.89813)
Supplement: Figure 5—figure supplement 5—source data 1. [file elife-89813-fig5-figsupp5-data1.xlsx]

## Sheet: Arkusz1
		Response [nm]
	Time [min]	A0 ACD	A0 Q66H G109D ACD
	0	0	0
	0.003333	0.000243	0.002844
	0.006667	-0.00187	-0.00016
	0.01	0.00232	-0.0022
	0.013333	0.002001	0.003492
	0.016667	0.006528	-0.00244
	0.02	0.002072	0.003707
	0.023333	0.003968	0.001871
	0.026667	0.000376	-0.00054
	0.03	0.00481	0.003795
	0.033333	0.009659	0.001492
	0.036667	0.003809	-4.9e-05
	0.04	0.004657	-0.0039
	0.043333	0.002476	0.003506
	0.046667	0.0068	0.001007
	0.05	0.005881	-0.00084
	0.053333	0.004734	0.004772
	0.056667	0.00458	0.002656
	0.06	0.004494	0.002576
	0.063333	0.007685	-0.00056
	0.066667	0.004889	0.000566
	0.07	0.001536	1.93e-05
	0.073333	0.006542	0.001635
	0.076667	0.001766	0.001732
	0.08	0.006057	0.005932
	0.083333	0.003326	0.003164
	0.086667	0.004561	0.0028
	0.09	0.002903	-0.00154
	0.093333	0.007793	0.001948
	0.096667	0.0066	0.002926
	0.1	0.00226	0.000497
	0.103333	0.004918	-0.00066
	0.106667	0.004865	0.005821
	0.11	0.004794	0.001824
	0.113333	0.002643	0.000482
	0.116667	0.005748	0.003265
	0.12	0.003036	0.001316
	0.123333	-0.0011	0.00689
	0.126667	0.009308	0.003589
	0.13	0.004073	0.002431
	0.133333	0.006206	0.000378
	0.136667	0.003788	0.000837
	0.14	0.003427	0.005579
	0.143333	0.00548	-0.00015
	0.146667	0.007995	0.002141
	0.15	0.004828	0.00245
	0.153333	0.006962	0.004072
	0.156667	0.007034	0.00309
	0.16	0.005194	0.00141
	0.163333	0.005257	-0.00247
	0.166667	0.004936	0.004086
	0.17	0.002179	0.008357
	0.173333	-0.00014	0.002439
	0.176667	0.007887	0.000279
	0.18	0.004406	0.006374
	0.183333	0.005706	0.002205
	0.186667	0.005641	0.001609
	0.19	0.00953	0.005308
	0.193333	0.007678	0.004444
	0.196667	0.005263	0.00238
	0.2	0.007812	0.002748
	0.203333	0.002522	0.002818
	0.206667	0.00742	0.003426
	0.21	0.007435	0.004805
	0.213333	0.003935	0.002851
	0.216667	0.00438	0.00114
	0.22	0.004336	0.002871
	0.223333	0.005182	0.002075
	0.226667	0.003887	0.002323
	0.23	0.004603	-0.00525
	0.233333	0.008449	0.00086
	0.236667	0.005586	0.001642
	0.24	-0.00019	0.002745
	0.243333	0.008951	0.005941
	0.246667	0.005076	0.00241
	0.25	0.006392	0.001067
	0.253333	0.003501	0.001664
	0.256667	0.001816	0.005048
	0.26	0.00311	0.003874
	0.263333	0.00198	0.004442
	0.266667	0.002511	0.003402
	0.27	0.007189	0.001152
	0.273333	0.006734	0.002568
	0.276667	0.004224	-0.00082
	0.28	0.001689	0.002236
	0.283333	0.00552	0.002407
	0.286667	0.004421	0.001021
	0.29	0.002311	0.005111
	0.293333	0.006977	0.003031
	0.296667	0.00709	0.004564
	0.3	0.00271	0.005373
	0.303333	0.002753	-0.00082
	0.306667	0.004796	0.00114
	0.31	0.003895	0.001316
	0.313333	0.005713	0.002469
	0.316667	0.006721	-0.00312
	0.32	0.005525	0.002813
	0.323333	0.005195	0.003038
	0.326667	0.002654	0.007953
	0.33	0.009968	-0.00131
	0.333333	0.00549	0.006649
	0.336667	0.008062	-0.00074
	0.34	0.008202	0.004468
	0.343333	0.002493	0.002849
	0.346667	0.004652	0.003067
	0.35	0.007726	0.003777
	0.353333	0.00655	0.0007
	0.356667	0.012485	0.004715
	0.36	0.005576	0.001134
	0.363333	0.005482	1.33e-05
	0.366667	0.002514	0.000223
	0.37	0.004607	0.003907
	0.373333	0.004268	0.004042
	0.376667	0.00221	0.003197
	0.38	0.005131	0.002925
	0.383333	0.001744	0.001802
	0.386667	0.003511	0.004323
	0.39	0.005149	0.004852
	0.393333	0.002262	0.005875
	0.396667	0.008644	0.000987
	0.4	0.007268	0.006365
	0.403333	0.003325	0.002376
	0.406667	0.004512	0.003109
	0.41	0.002363	0.003908
	0.413333	0.006485	0.004378
	0.416667	0.005197	0.004439
	0.42	0.005084	0.002699
	0.423333	0.001745	0.003908
	0.426667	0.000555	0.00039
	0.43	0.006899	0.001399
	0.433333	0.006491	0.004304
	0.436667	0.004619	0.003858
	0.44	0.004989	0.002001
	0.443333	0.002015	0.00438
	0.446667	0.008091	0.003027
	0.45	0.005517	0.006529
	0.453333	0.006434	0.00207
	0.456667	0.004515	-0.00057
	0.46	0.004182	-0.00171
	0.463333	0.007688	0.001147
	0.466667	0.006419	0.002994
	0.47	0.00773	0.003811
	0.473333	0.002444	0.00628
	0.476667	0.008601	0.003039
	0.48	0.005979	0.003253
	0.483333	0.005117	0.001806
	0.486667	0.005234	0.004493
	0.49	0.008246	0.0047
	0.493333	0.005557	0.004343
	0.496667	0.003958	0.005799
	0.5	0.009946	0.004681
	0.503333	0.005136	0.001821
	0.506667	0.005821	0.004667
	0.51	0.003902	0.00028
	0.513333	0.005853	0.005147
	0.516667	0.008523	0.00235
	0.52	0.000236	0.004346
	0.523333	0.006277	0.003828
	0.526667	0.003944	0.004708
	0.53	0.005742	0.003504
	0.533333	0.006427	0.00541
	0.536667	0.004634	0.003489
	0.54	0.007572	0.00032
	0.543333	0.002659	0.00227
	0.546667	0.00557	0.006536
	0.55	0.002156	0.006405
	0.553333	0.006485	-0.00081
	0.556667	0.008475	0.000648
	0.56	0.008261	-0.00077
	0.563333	0.007606	0.003819
	0.566667	0.002743	0.002092
	0.57	0.005871	0.002109
	0.573333	0.008897	0.003017
	0.576667	0.009189	0.000969
	0.58	0.006982	0.006136
	0.583333	0.012292	0.002887
	0.586667	0.009086	0.001128
	0.59	0.006353	0.001752
	0.593333	0.006492	0.00465
	0.596667	0.003271	0.002074
	0.6	0.004136	0.008313
	0.603333	0.006466	0.000807
	0.606667	0.004895	0.003362
	0.61	0.006746	0.001106
	0.613333	0.003553	0.002787
	0.616667	0.002838	0.003835
	0.62	0.006069	0.003532
	0.623333	0.003828	0.000932
	0.626667	0.006742	0.001681
	0.63	0.012922	0.002031
	0.633333	0.008638	0.002363
	0.636667	0.003121	0.002005
	0.64	0.004409	0.001541
	0.643333	0.007143	0.003328
	0.646667	0.00496	0.001547
	0.65	0.004839	0.000312
	0.653333	0.00621	0.001446
	0.656667	0.00502	0.004351
	0.66	0.008342	0.005465
	0.663333	0.000241	0.001589
	0.666667	0.007911	-2.3e-05
	0.67	-0.00078	0.000527
	0.673333	0.007435	-0.00134
	0.676667	0.006576	0.000588
	0.68	0.004595	0.001305
	0.683333	0.007003	0.000161
	0.686667	0.008719	-0.00034
	0.69	0.004842	0.000801
	0.693333	0.003489	0.002229
	0.696667	0.005191	0.001964
	0.7	0.001505	0.002264
	0.703333	0.007579	-0.00035
	0.706667	0.009317	-0.00032
	0.71	0.006753	-0.00081
	0.713333	0.008479	-1.1e-05
	0.716667	0.003843	0.004915
	0.72	0.000297	0.001958
	0.723333	0.006386	0.001827
	0.726667	0.008542	0.003545
	0.73	0.004886	-0.00148
	0.733333	0.010025	0.000806
	0.736667	0.004731	0.004818
	0.74	0.001094	0.0015
	0.743333	0.004192	0.001539
	0.746667	0.002301	0.004253
	0.75	0.003922	0.000853
	0.753333	0.005343	-0.00154
	0.756667	0.006657	0.002732
	0.76	0.0038	3.84e-06
	0.763333	0.002355	0.001182
	0.766667	0.003684	0.002419
	0.77	0.004169	-0.00165
	0.773333	0.007115	-0.00163
	0.776667	0.005761	0.004636
	0.78	0.002449	0.005128
	0.783333	-0.00085	-0.00234
	0.786667	0.006962	-0.00055
	0.79	0.006732	0.002511
	0.793333	0.010037	0.001133
	0.796667	0.005445	-8.1e-05
	0.8	0.000854	-0.00155
	0.803333	-0.00327	-0.00279
	0.806667	0.009853	0.001759
	0.81	0.002752	0.001728
	0.813333	0.005641	-0.00179
	0.816667	0.008764	0.004746
	0.82	0.006574	0.000851
	0.823333	0.010098	0.001116
	0.826667	0.003128	0.000152
	0.83	0.003504	-5.6e-05
	0.833333	0.003092	0.001056
	0.836667	0.005736	0.001635
	0.84	0.005567	0.004014
	0.843333	0.010028	-0.00105
	0.846667	0.006883	-5.4e-05
	0.85	0.00101	-0.00147
	0.853333	0.006145	0.003825
	0.856667	0.00612	-0.00138
	0.86	0.002622	0.001388
	0.863333	0.004411	0.000685
	0.866667	0.007196	0.001394
	0.87	0.006523	9.62e-05
	0.873333	0.005136	0.003573
	0.876667	0.007273	-0.00013
	0.88	0.007672	0.000995
	0.883333	0.002831	-0.00117
	0.886667	0.004018	0.002425
	0.89	0.003295	0.003348
	0.893333	0.006644	0.00241
	0.896667	0.008131	-0.00058
	0.9	0.003825	0.004591
	0.903333	0.001534	0.000431
	0.906667	0.006121	0.001969
	0.91	0.003291	-2.6e-05
	0.913333	0.007675	-0.00328
	0.916667	0.002924	-0.00024
	0.92	0.004124	0.006091
	0.923333	0.00393	-0.0016
	0.926667	0.001396	0.000617
	0.93	0.006135	-0.00308
	0.933333	0.001905	-0.00229
	0.936667	0.004438	0.001699
	0.94	-0.00189	-0.00066
	0.943333	0.003899	0.003668
	0.946667	0.006542	-0.00259
	0.95	0.004953	-7.6e-05
	0.953333	0.006121	-3.8e-05
	0.956667	0.005093	-0.00087
	0.96	-0.00068	-0.00564
	0.963333	0.003273	0.000988
	0.966667	0.006544	0.003491
	0.97	0.00591	0.000163
	0.973333	0.004376	-0.00097
	0.976667	0.00032	-0.00376
	0.98	0.002849	0.000277
	0.983333	0.003254	0.001931
	0.986667	0.003858	-0.0017
	0.99	0.003933	-0.00067
	0.993333	0.006795	-0.0014
	0.996667	0.002448	0.000975
	1	0.118076	0.061793
	1.00333	0.172019	0.093176
	1.00667	0.219908	0.123649
	1.01	0.263731	0.146281
	1.01333	0.306474	0.173016
	1.01667	0.351578	0.199137
	1.02	0.389306	0.223339
	1.02333	0.426709	0.24454
	1.02667	0.46596	0.267299
	1.03	0.4926	0.292457
	1.03333	0.528661	0.308096
	1.03667	0.556028	0.328759
	1.04	0.579598	0.342461
	1.04333	0.599911	0.364343
	1.04667	0.630965	0.378005
	1.05	0.648408	0.395075
	1.05333	0.672684	0.408668
	1.05667	0.693494	0.425172
	1.06	0.712043	0.43592
	1.06333	0.727869	0.44704
	1.06667	0.739823	0.465991
	1.07	0.762623	0.472742
	1.07333	0.775223	0.483119
	1.07667	0.788438	0.496346
	1.08	0.802915	0.507045
	1.08333	0.818785	0.520173
	1.08667	0.823924	0.527255
	1.09	0.84545	0.532278
	1.09333	0.849706	0.546699
	1.09667	0.865793	0.557423
	1.1	0.874634	0.560347
	1.10333	0.888195	0.570712
	1.10667	0.899905	0.578762
	1.11	0.903387	0.584116
	1.11333	0.916194	0.595447
	1.11667	0.920207	0.595678
	1.12	0.934088	0.606968
	1.12333	0.937115	0.608969
	1.12667	0.949056	0.621937
	1.13	0.961194	0.631879
	1.13333	0.962275	0.634741
	1.13667	0.977225	0.640132
	1.14	0.977521	0.649086
	1.14333	0.98828	0.647502
	1.14667	0.993114	0.655343
	1.15	0.998916	0.658329
	1.15333	1.01133	0.666015
	1.15667	1.01099	0.670484
	1.16	1.02122	0.676541
	1.16333	1.02999	0.680462
	1.16667	1.03533	0.687172
	1.17	1.04041	0.691031
	1.17333	1.04802	0.695108
	1.17667	1.0547	0.696736
	1.18	1.06123	0.704022
	1.18333	1.06964	0.708552
	1.18667	1.06675	0.710105
	1.19	1.07338	0.716084
	1.19333	1.08257	0.722922
	1.19667	1.08525	0.729456
	1.2	1.09131	0.729781
	1.20333	1.09969	0.732043
	1.20667	1.09737	0.735037
	1.21	1.10404	0.742797
	1.21333	1.11068	0.743561
	1.21667	1.11257	0.745621
	1.22	1.12002	0.750745
	1.22333	1.12057	0.754458
	1.22667	1.12769	0.760618
	1.23	1.13662	0.763698
	1.23333	1.14092	0.761948
	1.23667	1.14473	0.770911
	1.24	1.14873	0.775547
	1.24333	1.15284	0.776323
	1.24667	1.1581	0.781198
	1.25	1.16476	0.785461
	1.25333	1.1675	0.785566
	1.25667	1.17279	0.790254
	1.26	1.17334	0.789851
	1.26333	1.17774	0.79431
	1.26667	1.18078	0.800415
	1.27	1.18621	0.808008
	1.27333	1.1947	0.803216
	1.27667	1.19813	0.805745
	1.28	1.19918	0.811512
	1.28333	1.20102	0.812628
	1.28667	1.20728	0.816407
	1.29	1.21269	0.822192
	1.29333	1.21517	0.824219
	1.29667	1.22047	0.824303
	1.3	1.2225	0.834495
	1.30333	1.23074	0.831198
	1.30667	1.23193	0.835447
	1.31	1.23816	0.838819
	1.31333	1.23734	0.83871
	1.31667	1.24242	0.841686
	1.32	1.24676	0.846354
	1.32333	1.24715	0.84878
	1.32667	1.25158	0.847957
	1.33	1.25673	0.856938
	1.33333	1.25962	0.85599
	1.33667	1.2617	0.858242
	1.34	1.26892	0.861226
	1.34333	1.26755	0.863892
	1.34667	1.26959	0.867583
	1.35	1.2779	0.87058
	1.35333	1.27841	0.869775
	1.35667	1.28205	0.871385
	1.36	1.29028	0.875072
	1.36333	1.28953	0.882978
	1.36667	1.29402	0.88104
	1.37	1.29692	0.883594
	1.37333	1.30263	0.889547
	1.37667	1.30241	0.889577
	1.38	1.30598	0.890077
	1.38333	1.3129	0.894126
	1.38667	1.31532	0.894972
	1.39	1.31273	0.897047
	1.39333	1.32004	0.897165
	1.39667	1.32253	0.904132
	1.4	1.32167	0.905014
	1.40333	1.33131	0.90392
	1.40667	1.33572	0.905271
	1.41	1.33383	0.912867
	1.41333	1.33715	0.914373
	1.41667	1.34031	0.916781
	1.42	1.34305	0.916886
	1.42333	1.34309	0.920559
	1.42667	1.34353	0.922732
	1.43	1.3543	0.923831
	1.43333	1.35422	0.928157
	1.43667	1.35869	0.929692
	1.44	1.36064	0.927489
	1.44333	1.3645	0.928891
	1.44667	1.36863	0.937823
	1.45	1.3668	0.938755
	1.45333	1.36648	0.937102
	1.45667	1.37352	0.941609
	1.46	1.37663	0.946584
	1.46333	1.38329	0.945408
	1.46667	1.3815	0.948576
	1.47	1.38163	0.94721
	1.47333	1.38633	0.953539
	1.47667	1.38748	0.953059
	1.48	1.38996	0.955624
	1.48333	1.39518	0.957117
	1.48667	1.39876	0.958412
	1.49	1.40207	0.95801
	1.49333	1.4019	0.967428
	1.49667	1.40128	0.963042
	1.5	1.41073	0.969765
	1.50333	1.41114	0.967356
	1.50667	1.41355	0.975053
	1.51	1.41818	0.970756
	1.51333	1.4203	0.969846
	1.51667	1.42153	0.977751
	1.52	1.42026	0.975014
	1.52333	1.42105	0.980306
	1.52667	1.42795	0.982444
	1.53	1.43279	0.984775
	1.53333	1.43689	0.985394
	1.53667	1.437	0.989807
	1.54	1.44035	0.985313
	1.54333	1.44358	0.991694
	1.54667	1.44506	0.990249
	1.55	1.45288	0.99391
	1.55333	1.44691	0.998179
	1.55667	1.44926	0.99795
	1.56	1.45398	1.00045
	1.56333	1.45373	1.00135
	1.56667	1.45407	1.00308
	1.57	1.45873	1.00616
	1.57333	1.46068	1.00473
	1.57667	1.4614	1.0074
	1.58	1.4648	1.01189
	1.58333	1.46933	1.01697
	1.58667	1.46942	1.00869
	1.59	1.47339	1.01271
	1.59333	1.47585	1.01508
	1.59667	1.47631	1.01675
	1.6	1.47886	1.01934
	1.60333	1.48454	1.02563
	1.60667	1.48267	1.02514
	1.61	1.48356	1.02281
	1.61333	1.48814	1.02507
	1.61667	1.48869	1.02719
	1.62	1.48866	1.03215
	1.62333	1.49455	1.03332
	1.62667	1.49717	1.03149
	1.63	1.49796	1.03594
	1.63333	1.50646	1.03671
	1.63667	1.50335	1.03534
	1.64	1.50759	1.03759
	1.64333	1.50941	1.04103
	1.64667	1.51225	1.03663
	1.65	1.51193	1.04228
	1.65333	1.51669	1.04626
	1.65667	1.51814	1.04557
	1.66	1.51666	1.04457
	1.66333	1.52443	1.05144
	1.66667	1.52607	1.05139
	1.67	1.52487	1.05178
	1.67333	1.52744	1.0544
	1.67667	1.52698	1.05645
	1.68	1.53158	1.06283
	1.68333	1.53335	1.06036
	1.68667	1.53331	1.06623
	1.69	1.53746	1.06273
	1.69333	1.5363	1.06693
	1.69667	1.54288	1.06854
	1.7	1.54509	1.06337
	1.70333	1.54693	1.07285
	1.70667	1.54868	1.07299
	1.71	1.5471	1.07066
	1.71333	1.55291	1.07522
	1.71667	1.55301	1.07509
	1.72	1.55453	1.07614
	1.72333	1.55903	1.07316
	1.72667	1.55795	1.0818
	1.73	1.55895	1.08027
	1.73333	1.56475	1.08368
	1.73667	1.56171	1.08275
	1.74	1.56303	1.08172
	1.74333	1.56587	1.08897
	1.74667	1.5734	1.08728
	1.75	1.57238	1.08424
	1.75333	1.57285	1.08801
	1.75667	1.57387	1.08958
	1.76	1.57826	1.09134
	1.76333	1.58484	1.09087
	1.76667	1.58164	1.09962
	1.77	1.58674	1.09821
	1.77333	1.58695	1.09911
	1.77667	1.58525	1.10086
	1.78	1.58601	1.10312
	1.78333	1.58705	1.10158
	1.78667	1.59706	1.10281
	1.79	1.59383	1.10489
	1.79333	1.59529	1.10465
	1.79667	1.59581	1.10692
	1.8	1.60181	1.10984
	1.80333	1.60347	1.11352
	1.80667	1.60419	1.1099
	1.81	1.6044	1.11434
	1.81333	1.60962	1.11479
	1.81667	1.6085	1.11247
	1.82	1.61096	1.11863
	1.82333	1.61506	1.11936
	1.82667	1.61648	1.11844
	1.83	1.61648	1.11955
	1.83333	1.61977	1.12101
	1.83667	1.61892	1.12014
	1.84	1.62102	1.12715
	1.84333	1.62409	1.13125
	1.84667	1.62896	1.12529
	1.85	1.62465	1.13026
	1.85333	1.62635	1.13427
	1.85667	1.6294	1.13339
	1.86	1.6293	1.13111
	1.86333	1.63565	1.136
	1.86667	1.63302	1.13677
	1.87	1.63717	1.1349
	1.87333	1.64195	1.13673
	1.87667	1.63844	1.14242
	1.88	1.64227	1.14214
	1.88333	1.64551	1.13932
	1.88667	1.64867	1.14789
	1.89	1.64715	1.14792
	1.89333	1.65123	1.14616
	1.89667	1.64986	1.14385
	1.9	1.65696	1.15247
	1.90333	1.66057	1.14553
	1.90667	1.65759	1.14842
	1.91	1.65563	1.15262
	1.91333	1.66261	1.15277
	1.91667	1.65968	1.15687
	1.92	1.66204	1.15742
	1.92333	1.66278	1.15872
	1.92667	1.66732	1.15786
	1.93	1.66164	1.16441
	1.93333	1.66842	1.16215
	1.93667	1.67147	1.16481
	1.94	1.67212	1.16165
	1.94333	1.67113	1.16371
	1.94667	1.67375	1.16506
	1.95	1.67454	1.16724
	1.95333	1.68212	1.167
	1.95667	1.67732	1.16811
	1.96	1.6822	1.17055
	1.96333	1.68477	1.1683
	1.96667	1.6861	1.17178
	1.97	1.689	1.17539
	1.97333	1.68818	1.17416
	1.97667	1.68956	1.17829
	1.98	1.69217	1.17733
	1.98333	1.69327	1.17954
	1.98667	1.69249	1.17753
	1.99	1.69829	1.18397
	1.99333	1.69811	1.18486
	1.99667	1.69971	1.18377
	2	1.69583	1.18512
	2.00333	1.69785	1.18577
	2.00667	1.70067	1.18834
	2.01	1.70493	1.18855
	2.01333	1.70586	1.18772
	2.01667	1.7091	1.18593
	2.02	1.71023	1.19159
	2.02333	1.71263	1.1928
	2.02667	1.71176	1.19285
	2.03	1.70932	1.19538
	2.03333	1.71621	1.19219
	2.03667	1.72002	1.19641
	2.04	1.71794	1.19498
	2.04333	1.71938	1.19978
	2.04667	1.72064	1.19753
	2.05	1.72315	1.20465
	2.05333	1.72142	1.20551
	2.05667	1.72725	1.19702
	2.06	1.72941	1.20598
	2.06333	1.73032	1.2101
	2.06667	1.72608	1.20302
	2.07	1.73054	1.21033
	2.07333	1.73403	1.20923
	2.07667	1.73636	1.20998
	2.08	1.73382	1.21089
	2.08333	1.73543	1.21404
	2.08667	1.73953	1.21341
	2.09	1.74451	1.21166
	2.09333	1.73945	1.21563
	2.09667	1.74207	1.21622
	2.1	1.74741	1.21765
	2.10333	1.74113	1.22144
	2.10667	1.74929	1.22198
	2.11	1.74904	1.22281
	2.11333	1.75196	1.22255
	2.11667	1.75317	1.22368
	2.12	1.75394	1.22534
	2.12333	1.75653	1.22326
	2.12667	1.75901	1.22497
	2.13	1.75672	1.22719
	2.13333	1.75882	1.2269
	2.13667	1.7605	1.22898
	2.14	1.76319	1.2276
	2.14333	1.76421	1.23374
	2.14667	1.75991	1.2297
	2.15	1.76918	1.23521
	2.15333	1.76634	1.23602
	2.15667	1.76893	1.23813
	2.16	1.76795	1.23143
	2.16333	1.77421	1.23517
	2.16667	1.77214	1.2343
	2.17	1.77362	1.23795
	2.17333	1.77642	1.24023
	2.17667	1.77522	1.24237
	2.18	1.77716	1.24424
	2.18333	1.78489	1.24302
	2.18667	1.77781	1.24977
	2.19	1.77904	1.24566
	2.19333	1.78095	1.2474
	2.19667	1.78417	1.25035
	2.2	1.78674	1.2497
	2.20333	1.79121	1.25159
	2.20667	1.79375	1.24865
	2.21	1.78956	1.2521
	2.21333	1.79213	1.25085
	2.21667	1.79544	1.25425
	2.22	1.79903	1.25734
	2.22333	1.79755	1.25813
	2.22667	1.80288	1.25473
	2.23	1.79865	1.25636
	2.23333	1.80097	1.25873
	2.23667	1.80157	1.25767
	2.24	1.80128	1.26165
	2.24333	1.80528	1.26439
	2.24667	1.80491	1.26079
	2.25	1.80859	1.26645
	2.25333	1.80658	1.26427
	2.25667	1.80766	1.26506
	2.26	1.8122	1.26648
	2.26333	1.81362	1.26844
	2.26667	1.81504	1.27095
	2.27	1.81301	1.27038
	2.27333	1.81308	1.27246
	2.27667	1.81838	1.27447
	2.28	1.81694	1.27473
	2.28333	1.8203	1.27276
	2.28667	1.81849	1.27273
	2.29	1.82104	1.27955
	2.29333	1.82546	1.27928
	2.29667	1.82454	1.27783
	2.3	1.82764	1.27937
	2.30333	1.8242	1.27906
	2.30667	1.82862	1.28162
	2.31	1.82999	1.27915
	2.31333	1.82986	1.28427
	2.31667	1.8337	1.28746
	2.32	1.83482	1.28254
	2.32333	1.83329	1.28335
	2.32667	1.84011	1.29088
	2.33	1.8368	1.28527
	2.33333	1.83666	1.28771
	2.33667	1.84219	1.28976
	2.34	1.84064	1.29055
	2.34333	1.84293	1.29334
	2.34667	1.84537	1.29338
	2.35	1.84252	1.29452
	2.35333	1.84491	1.29717
	2.35667	1.84665	1.29161
	2.36	1.84893	1.29735
	2.36333	1.8499	1.29369
	2.36667	1.85004	1.30195
	2.37	1.85043	1.29703
	2.37333	1.85448	1.29841
	2.37667	1.8495	1.29991
	2.38	1.85461	1.30284
	2.38333	1.85024	1.30012
	2.38667	1.85937	1.30255
	2.39	1.85977	1.30332
	2.39333	1.85946	1.30013
	2.39667	1.86224	1.30508
	2.4	1.86434	1.3095
	2.40333	1.86399	1.31085
	2.40667	1.8663	1.31159
	2.41	1.87184	1.31312
	2.41333	1.86635	1.30812
	2.41667	1.87291	1.30926
	2.42	1.86958	1.31241
	2.42333	1.87112	1.31719
	2.42667	1.87461	1.31499
	2.43	1.87708	1.31556
	2.43333	1.87283	1.31923
	2.43667	1.87477	1.31067
	2.44	1.88017	1.31255
	2.44333	1.88116	1.32022
	2.44667	1.87958	1.3162
	2.45	1.88165	1.31935
	2.45333	1.88553	1.3218
	2.45667	1.88247	1.32026
	2.46	1.88194	1.3214
	2.46333	1.8839	1.3208
	2.46667	1.88283	1.32179
	2.47	1.8875	1.32441
	2.47333	1.88995	1.32826
	2.47667	1.88943	1.32639
	2.48	1.89494	1.32931
	2.48333	1.89383	1.32886
	2.48667	1.89327	1.33177
	2.49	1.89144	1.32915
	2.49333	1.89639	1.33523
	2.49667	1.8945	1.33303
	2.5	1.89627	1.3341
	2.50333	1.90377	1.33586
	2.50667	1.90342	1.33607
	2.51	1.89873	1.33581
	2.51333	1.90027	1.33203
	2.51667	1.904	1.33636
	2.52	1.90568	1.33588
	2.52333	1.90889	1.341
	2.52667	1.91129	1.33837
	2.53	1.90643	1.33837
	2.53333	1.91434	1.34053
	2.53667	1.91017	1.3467
	2.54	1.90875	1.34581
	2.54333	1.91532	1.34339
	2.54667	1.91018	1.34423
	2.55	1.91507	1.34531
	2.55333	1.9195	1.35138
	2.55667	1.91974	1.34621
	2.56	1.91707	1.35014
	2.56333	1.91807	1.3451
	2.56667	1.91959	1.35099
	2.57	1.91517	1.35179
	2.57333	1.92493	1.34984
	2.57667	1.92287	1.35069
	2.58	1.92614	1.35305
	2.58333	1.9279	1.35821
	2.58667	1.92827	1.35777
	2.59	1.92783	1.35644
	2.59333	1.93231	1.35674
	2.59667	1.93353	1.35742
	2.6	1.93263	1.36069
	2.60333	1.93878	1.36013
	2.60667	1.93571	1.36017
	2.61	1.93682	1.36137
	2.61333	1.93173	1.3631
	2.61667	1.93553	1.36255
	2.62	1.93557	1.36203
	2.62333	1.93918	1.36124
	2.62667	1.94248	1.36704
	2.63	1.94582	1.36919
	2.63333	1.94186	1.36291
	2.63667	1.94116	1.37073
	2.64	1.94688	1.36753
	2.64333	1.94514	1.37002
	2.64667	1.94657	1.37146
	2.65	1.94931	1.37103
	2.65333	1.9482	1.37252
	2.65667	1.95133	1.37557
	2.66	1.95547	1.37643
	2.66333	1.95171	1.37421
	2.66667	1.9554	1.37747
	2.67	1.95816	1.37698
	2.67333	1.95779	1.37472
	2.67667	1.95417	1.38301
	2.68	1.95371	1.37877
	2.68333	1.96115	1.38069
	2.68667	1.95997	1.38031
	2.69	1.96312	1.37627
	2.69333	1.96555	1.37972
	2.69667	1.96762	1.38243
	2.7	1.96142	1.3789
	2.70333	1.97062	1.38485
	2.70667	1.96764	1.3859
	2.71	1.9647	1.38907
	2.71333	1.97019	1.38346
	2.71667	1.96917	1.38742
	2.72	1.97239	1.38764
	2.72333	1.97487	1.39017
	2.72667	1.97433	1.39128
	2.73	1.97374	1.39256
	2.73333	1.97699	1.39512
	2.73667	1.97707	1.39699
	2.74	1.97808	1.39465
	2.74333	1.98125	1.39469
	2.74667	1.98258	1.39458
	2.75	1.97892	1.39172
	2.75333	1.98232	1.39631
	2.75667	1.9799	1.39208
	2.76	1.9828	1.39484
	2.76333	1.98387	1.3969
	2.76667	1.98427	1.4023
	2.77	1.98311	1.40004
	2.77333	1.98554	1.39697
	2.77667	1.99036	1.40745
	2.78	1.98732	1.39891
	2.78333	1.98877	1.40546
	2.78667	1.99279	1.40392
	2.79	1.9916	1.40478
	2.79333	1.99071	1.40519
	2.79667	1.99319	1.41266
	2.8	1.99507	1.40669
	2.80333	1.99647	1.40912
	2.80667	2.00085	1.41078
	2.81	1.99933	1.41359
	2.81333	2.00082	1.40987
	2.81667	2.00249	1.41409
	2.82	1.99813	1.41082
	2.82333	2.00187	1.41361
	2.82667	2.00263	1.41161
	2.83	2.00655	1.41679
	2.83333	2.00448	1.4184
	2.83667	2.01299	1.41688
	2.84	2.00571	1.41716
	2.84333	2.00665	1.41566
	2.84667	2.00879	1.41626
	2.85	2.01194	1.41735
	2.85333	2.00958	1.41893
	2.85667	2.01302	1.422
	2.86	2.01433	1.42201
	2.86333	2.01762	1.42368
	2.86667	2.02019	1.42489
	2.87	2.01927	1.42318
	2.87333	2.01695	1.42589
	2.87667	2.02398	1.42343
	2.88	2.01757	1.42799
	2.88333	2.02312	1.42987
	2.88667	2.02199	1.42386
	2.89	2.02034	1.42812
	2.89333	2.02796	1.43057
	2.89667	2.02204	1.43194
	2.9	2.0231	1.43132
	2.90333	2.02265	1.42824
	2.90667	2.028	1.42874
	2.91	2.02974	1.42885
	2.91333	2.03002	1.42969
	2.91667	2.0287	1.43189
	2.92	2.03057	1.43326
	2.92333	2.03246	1.43673
	2.92667	2.03104	1.43821
	2.93	2.03343	1.43248
	2.93333	2.03737	1.43743
	2.93667	2.03686	1.43875
	2.94	2.03971	1.43857
	2.94333	2.03862	1.44126
	2.94667	2.03972	1.43933
	2.95	2.03984	1.44019
	2.95333	2.04262	1.44242
	2.95667	2.04074	1.44229
	2.96	2.04282	1.44258
	2.96333	2.04481	1.44447
	2.96667	2.04678	1.44632
	2.97	2.04872	1.44581
	2.97333	2.05012	1.44497
	2.97667	2.04994	1.44573
	2.98	2.04817	1.44787
	2.98333	2.04567	1.44858
	2.98667	2.04823	1.44808
	2.99	2.04876	1.45011
	2.99333	2.0525	1.44724
	2.99667	2.05448	1.44724
	3	2.05684	1.4501
	3.00333	2.05487	1.44775
	3.00667	2.06073	1.44795
	3.01	2.06082	1.45401
	3.01333	2.06062	1.45418
	3.01667	2.06102	1.45754
	3.02	2.05988	1.45734
	3.02333	2.0663	1.46064
	3.02667	2.06551	1.45841
	3.03	2.06189	1.46002
	3.03333	2.06453	1.46154
	3.03667	2.06256	1.45845
	3.04	2.06185	1.45885
	3.04333	2.06268	1.45742
	3.04667	2.06925	1.46355
	3.05	2.06711	1.46524
	3.05333	2.07134	1.46053
	3.05667	2.0678	1.46262
	3.06	2.06853	1.46574
	3.06333	2.07117	1.46767
	3.06667	2.07133	1.46228
	3.07	2.07569	1.47063
	3.07333	2.07443	1.47077
	3.07667	2.07524	1.46455
	3.08	2.08392	1.46917
	3.08333	2.07153	1.46745
	3.08667	2.07739	1.47211
	3.09	2.08445	1.47638
	3.09333	2.08054	1.46853
	3.09667	2.0817	1.46943
	3.1	2.08094	1.47704
	3.10333	2.08025	1.47269
	3.10667	2.08322	1.47212
	3.11	2.08696	1.47509
	3.11333	2.086	1.47458
	3.11667	2.08712	1.47411
	3.12	2.0872	1.47948
	3.12333	2.08774	1.47962
	3.12667	2.08478	1.47893
	3.13	2.08849	1.47875
	3.13333	2.08516	1.48228
	3.13667	2.09244	1.48269
	3.14	2.08878	1.47826
	3.14333	2.09253	1.48377
	3.14667	2.09384	1.48218
	3.15	2.09446	1.48287
	3.15333	2.09643	1.48297
	3.15667	2.09858	1.48696
	3.16	2.09803	1.4822
	3.16333	2.10083	1.4869
	3.16667	2.09908	1.48496
	3.17	2.09841	1.48633
	3.17333	2.09655	1.48598
	3.17667	2.10557	1.48867
	3.18	2.10498	1.49237
	3.18333	2.1009	1.48983
	3.18667	2.1016	1.48921
	3.19	2.10291	1.49216
	3.19333	2.10547	1.49096
	3.19667	2.11052	1.49493
	3.2	2.10901	1.4952
	3.20333	2.10662	1.49269
	3.20667	2.11123	1.49448
	3.21	2.11258	1.49378
	3.21333	2.11453	1.49573
	3.21667	2.11236	1.49637
	3.22	2.11529	1.49918
	3.22333	2.11559	1.50086
	3.22667	2.11629	1.497
	3.23	2.114	1.49664
	3.23333	2.12214	1.50022
	3.23667	2.12252	1.50414
	3.24	2.12176	1.50535
	3.24333	2.1199	1.49875
	3.24667	2.11995	1.50445
	3.25	2.11913	1.49828
	3.25333	2.12139	1.5033
	3.25667	2.12391	1.50738
	3.26	2.12239	1.50607
	3.26333	2.12771	1.50026
	3.26667	2.12607	1.50415
	3.27	2.1252	1.50463
	3.27333	2.12629	1.50276
	3.27667	2.12979	1.50811
	3.28	2.13251	1.51418
	3.28333	2.13586	1.51067
	3.28667	2.13479	1.50967
	3.29	2.13335	1.51096
	3.29333	2.13373	1.51279
	3.29667	2.13536	1.50701
	3.3	2.13634	1.51219
	3.30333	2.13398	1.51389
	3.30667	2.13833	1.5184
	3.31	2.1382	1.51535
	3.31333	2.13886	1.51456
	3.31667	2.14214	1.51939
	3.32	2.13805	1.51671
	3.32333	2.14121	1.51656
	3.32667	2.14045	1.52025
	3.33	2.14211	1.52047
	3.33333	2.13905	1.5204
	3.33667	2.14478	1.51529
	3.34	2.14544	1.51887
	3.34333	2.14698	1.5232
	3.34667	2.14457	1.51641
	3.35	2.14666	1.52225
	3.35333	2.15144	1.5247
	3.35667	2.1503	1.52131
	3.36	2.1482	1.52947
	3.36333	2.1537	1.52523
	3.36667	2.14903	1.52428
	3.37	2.14643	1.52717
	3.37333	2.15256	1.52753
	3.37667	2.15267	1.52473
	3.38	2.15488	1.53062
	3.38333	2.15557	1.52825
	3.38667	2.15698	1.5297
	3.39	2.15788	1.5334
	3.39333	2.15819	1.53474
	3.39667	2.16119	1.53363
	3.4	2.1579	1.53127
	3.40333	2.15995	1.53685
	3.40667	2.16053	1.53341
	3.41	2.16013	1.53331
	3.41333	2.16357	1.53476
	3.41667	2.16598	1.53615
	3.42	2.16381	1.53419
	3.42333	2.16805	1.53741
	3.42667	2.16644	1.53743
	3.43	2.16664	1.53671
	3.43333	2.17031	1.53716
	3.43667	2.16619	1.54292
	3.44	2.16819	1.53516
	3.44333	2.17209	1.54032
	3.44667	2.1701	1.53866
	3.45	2.16982	1.53852
	3.45333	2.17446	1.54046
	3.45667	2.17237	1.54825
	3.46	2.17633	1.54227
	3.46333	2.17366	1.5445
	3.46667	2.17509	1.54434
	3.47	2.17937	1.53935
	3.47333	2.17453	1.55051
	3.47667	2.17677	1.54426
	3.48	2.18485	1.55011
	3.48333	2.17841	1.54508
	3.48667	2.1785	1.54808
	3.49	2.17985	1.55036
	3.49333	2.18023	1.54701
	3.49667	2.18399	1.54661
	3.5	2.18849	1.55066
	3.50333	2.18485	1.54885
	3.50667	2.18507	1.54997
	3.51	2.18437	1.55001
	3.51333	2.18881	1.55326
	3.51667	2.18539	1.55189
	3.52	2.18981	1.55468
	3.52333	2.18693	1.5532
	3.52667	2.19111	1.55277
	3.53	2.1901	1.55499
	3.53333	2.19218	1.55264
	3.53667	2.19017	1.55455
	3.54	2.19436	1.55993
	3.54333	2.19042	1.55939
	3.54667	2.19625	1.5612
	3.55	2.20096	1.56057
	3.55333	2.19065	1.55619
	3.55667	2.19504	1.5638
	3.56	2.19913	1.55933
	3.56333	2.20204	1.56287
	3.56667	2.2	1.56353
	3.57	2.1983	1.56143
	3.57333	2.19983	1.56531
	3.57667	2.2039	1.56406
	3.58	2.20135	1.56184
	3.58333	2.20825	1.57068
	3.58667	2.2027	1.56816
	3.59	2.20234	1.56881
	3.59333	2.20627	1.56996
	3.59667	2.20935	1.56689
	3.6	2.208	1.56979
	3.60333	2.20855	1.56819
	3.60667	2.20907	1.57218
	3.61	2.20854	1.57282
	3.61333	2.21512	1.57343
	3.61667	2.2127	1.57078
	3.62	2.20989	1.57324
	3.62333	2.21201	1.56886
	3.62667	2.21383	1.57765
	3.63	2.21699	1.57451
	3.63333	2.216	1.57698
	3.63667	2.22373	1.57691
	3.64	2.2124	1.57687
	3.64333	2.21885	1.57911
	3.64667	2.22039	1.57312
	3.65	2.21926	1.57834
	3.65333	2.22235	1.57889
	3.65667	2.21998	1.58116
	3.66	2.22088	1.57865
	3.66333	2.22029	1.57849
	3.66667	2.22709	1.57746
	3.67	2.2271	1.58204
	3.67333	2.22331	1.58099
	3.67667	2.22575	1.58432
	3.68	2.22668	1.57914
	3.68333	2.22618	1.58644
	3.68667	2.22901	1.58565
	3.69	2.228	1.58238
	3.69333	2.22928	1.58397
	3.69667	2.22967	1.58913
	3.7	2.23014	1.58849
	3.70333	2.22964	1.58568
	3.70667	2.23579	1.59214
	3.71	2.22982	1.58944
	3.71333	2.23257	1.58587
	3.71667	2.23594	1.58504
	3.72	2.23724	1.58719
	3.72333	2.23704	1.59346
	3.72667	2.24069	1.59283
	3.73	2.24014	1.59026
	3.73333	2.23707	1.59118
	3.73667	2.2381	1.59488
	3.74	2.24012	1.59306
	3.74333	2.24318	1.59424
	3.74667	2.24208	1.59534
	3.75	2.24009	1.59478
	3.75333	2.24442	1.60013
	3.75667	2.24079	1.59237
	3.76	2.24805	1.59536
	3.76333	2.24644	1.59947
	3.76667	2.24889	1.59985
	3.77	2.24464	1.59845
	3.77333	2.24302	1.60625
	3.77667	2.25136	1.59656
	3.78	2.24927	1.60474
	3.78333	2.24419	1.60568
	3.78667	2.24974	1.60317
	3.79	2.24846	1.60361
	3.79333	2.25045	1.60414
	3.79667	2.25228	1.60777
	3.8	2.24854	1.60228
	3.80333	2.2578	1.6056
	3.80667	2.2551	1.61018
	3.81	2.25745	1.60776
	3.81333	2.25199	1.60451
	3.81667	2.25393	1.60581
	3.82	2.25685	1.60749
	3.82333	2.25561	1.60602
	3.82667	2.25913	1.61018
	3.83	2.25866	1.60659
	3.83333	2.25888	1.60904
	3.83667	2.26181	1.6084
	3.84	2.26305	1.60984
	3.84333	2.25958	1.60627
	3.84667	2.26343	1.61356
	3.85	2.2595	1.61442
	3.85333	2.26627	1.61255
	3.85667	2.26457	1.61434
	3.86	2.26057	1.60937
	3.86333	2.26432	1.61826
	3.86667	2.26914	1.61609
	3.87	2.2654	1.614
	3.87333	2.26741	1.61362
	3.87667	2.26727	1.61664
	3.88	2.26759	1.62192
	3.88333	2.27342	1.61576
	3.88667	2.26988	1.62014
	3.89	2.27095	1.624
	3.89333	2.27352	1.61565
	3.89667	2.27545	1.6206
	3.9	2.27644	1.62207
	3.90333	2.27417	1.62215
	3.90667	2.27594	1.62401
	3.91	2.27752	1.62473
	3.91333	2.27401	1.61965
	3.91667	2.27547	1.62248
	3.92	2.27884	1.62572
	3.92333	2.28282	1.62794
	3.92667	2.28223	1.62727
	3.93	2.27895	1.62473
	3.93333	2.28446	1.62591
	3.93667	2.28449	1.62578
	3.94	2.28056	1.62722
	3.94333	2.2839	1.62867
	3.94667	2.28792	1.62627
	3.95	2.291	1.62821
	3.95333	2.28397	1.62649
	3.95667	2.28834	1.63006
	3.96	2.28821	1.632
	3.96333	2.28966	1.63199
	3.96667	2.2891	1.6321
	3.97	2.2928	1.63581
	3.97333	2.2908	1.63464
	3.97667	2.28934	1.63765
	3.98	2.2911	1.63249
	3.98333	2.28921	1.63441
	3.98667	2.29257	1.63715
	3.99	2.29446	1.63401
	3.99333	2.29331	1.63291
	3.99667	2.29614	1.6402
	4	2.29511	1.63959
	4.00333	2.30273	1.63803
	4.00667	2.29639	1.63978
	4.01	2.29931	1.6373
	4.01333	2.2997	1.6386
	4.01667	2.29715	1.63953
	4.02	2.30064	1.64058
	4.02333	2.29593	1.64048
	4.02667	2.30485	1.64032
	4.03	2.29909	1.64629
	4.03333	2.30705	1.64331
	4.03667	2.3016	1.64218
	4.04	2.30645	1.64498
	4.04333	2.3048	1.64548
	4.04667	2.30632	1.64208
	4.05	2.30475	1.64077
	4.05333	2.30213	1.64596
	4.05667	2.31393	1.64941
	4.06	2.31054	1.64736
	4.06333	2.30753	1.64951
	4.06667	2.30862	1.65014
	4.07	2.31396	1.64948
	4.07333	2.3117	1.64881
	4.07667	2.31118	1.64984
	4.08	2.31285	1.65483
	4.08333	2.31155	1.64647
	4.08667	2.31753	1.6489
	4.09	2.31429	1.65282
	4.09333	2.31763	1.65554
	4.09667	2.3193	1.65682
	4.1	2.31865	1.65264
	4.10333	2.31767	1.65525
	4.10667	2.31803	1.65013
	4.11	2.31865	1.65421
	4.11333	2.32042	1.65542
	4.11667	2.32085	1.65425
	4.12	2.32077	1.65931
	4.12333	2.3223	1.65516
	4.12667	2.32374	1.65837
	4.13	2.32682	1.66233
	4.13333	2.31952	1.66212
	4.13667	2.32858	1.65745
	4.14	2.32419	1.66031
	4.14333	2.32782	1.66215
	4.14667	2.32717	1.65898
	4.15	2.32833	1.66451
	4.15333	2.32535	1.66095
	4.15667	2.32755	1.66199
	4.16	2.32421	1.66419
	4.16333	2.33193	1.66051
	4.16667	2.32889	1.66689
	4.17	2.33191	1.66033
	4.17333	2.33279	1.66602
	4.17667	2.33396	1.66608
	4.18	2.33256	1.66182
	4.18333	2.33276	1.66864
	4.18667	2.33829	1.66395
	4.19	2.33361	1.66373
	4.19333	2.33833	1.66779
	4.19667	2.33569	1.66777
	4.2	2.33663	1.66828
	4.20333	2.33624	1.6715
	4.20667	2.33911	1.66729
	4.21	2.33798	1.67371
	4.21333	2.33971	1.67114
	4.21667	2.34195	1.66991
	4.22	2.34132	1.67392
	4.22333	2.34234	1.66888
	4.22667	2.34737	1.67169
	4.23	2.34334	1.66902
	4.23333	2.3477	1.67454
	4.23667	2.34321	1.67326
	4.24	2.34336	1.67406
	4.24333	2.34879	1.67794
	4.24667	2.34421	1.67507
	4.25	2.35236	1.67126
	4.25333	2.34724	1.67728
	4.25667	2.34665	1.67844
	4.26	2.35134	1.67915
	4.26333	2.35426	1.68307
	4.26667	2.35282	1.68115
	4.27	2.35171	1.678
	4.27333	2.35387	1.67982
	4.27667	2.3506	1.68371
	4.28	2.35908	1.68199
	4.28333	2.35229	1.68052
	4.28667	2.35603	1.68549
	4.29	2.36175	1.67861
	4.29333	2.35508	1.68558
	4.29667	2.35862	1.68698
	4.3	2.35296	1.68001
	4.30333	2.3614	1.68304
	4.30667	2.3555	1.68956
	4.31	2.36154	1.68614
	4.31333	2.36505	1.68724
	4.31667	2.35804	1.69023
	4.32	2.36178	1.68611
	4.32333	2.3632	1.6921
	4.32667	2.36134	1.68974
	4.33	2.36816	1.69019
	4.33333	2.36916	1.68663
	4.33667	2.36832	1.68923
	4.34	2.3641	1.69423
	4.34333	2.36246	1.69146
	4.34667	2.36702	1.69405
	4.35	2.36816	1.69137
	4.35333	2.36641	1.69308
	4.35667	2.36855	1.69453
	4.36	2.3692	1.69436
	4.36333	2.37112	1.69415
	4.36667	2.36772	1.70026
	4.37	2.3705	1.6966
	4.37333	2.3725	1.69642
	4.37667	2.37404	1.69797
	4.38	2.37601	1.694
	4.38333	2.37588	1.69591
	4.38667	2.3732	1.69662
	4.39	2.37214	1.69944
	4.39333	2.37461	1.69871
	4.39667	2.37295	1.69682
	4.4	2.37547	1.70057
	4.40333	2.37788	1.70091
	4.40667	2.37748	1.70212
	4.41	2.37582	1.69901
	4.41333	2.37801	1.70533
	4.41667	2.384	1.69763
	4.42	2.3794	1.70206
	4.42333	2.38321	1.70485
	4.42667	2.37665	1.70317
	4.43	2.37874	1.70898
	4.43333	2.38225	1.70144
	4.43667	2.3777	1.70217
	4.44	2.38248	1.70469
	4.44333	2.38801	1.70419
	4.44667	2.38297	1.70797
	4.45	2.38549	1.70902
	4.45333	2.38857	1.71039
	4.45667	2.38966	1.70711
	4.46	2.38887	1.7082
	4.46333	2.39289	1.70831
	4.46667	2.39071	1.70992
	4.47	2.38833	1.70967
	4.47333	2.3898	1.70829
	4.47667	2.39214	1.70985
	4.48	2.39347	1.71511
	4.48333	2.38674	1.7099
	4.48667	2.39136	1.7138
	4.49	2.39357	1.71254
	4.49333	2.39714	1.71493
	4.49667	2.39027	1.71677
	4.5	2.39516	1.71614
	4.50333	2.39885	1.71127
	4.50667	2.39668	1.70765
	4.51	2.39516	1.71138
	4.51333	2.39722	1.7146
	4.51667	2.39984	1.71712
	4.52	2.39765	1.71799
	4.52333	2.40132	1.71534
	4.52667	2.4003	1.71832
	4.53	2.39852	1.71369
	4.53333	2.40596	1.71942
	4.53667	2.4013	1.71878
	4.54	2.40249	1.71726
	4.54333	2.40521	1.71954
	4.54667	2.40697	1.723
	4.55	2.40575	1.72255
	4.55333	2.40728	1.71959
	4.55667	2.40679	1.72033
	4.56	2.40857	1.72635
	4.56333	2.40733	1.72646
	4.56667	2.40871	1.72439
	4.57	2.40839	1.72366
	4.57333	2.40826	1.72549
	4.57667	2.41125	1.72663
	4.58	2.41108	1.72782
	4.58333	2.40467	1.72271
	4.58667	2.41421	1.72734
	4.59	2.41103	1.72899
	4.59333	2.4147	1.72755
	4.59667	2.41424	1.72876
	4.6	2.41099	1.73129
	4.60333	2.41644	1.73132
	4.60667	2.41724	1.72822
	4.61	2.41558	1.7273
	4.61333	2.41965	1.7332
	4.61667	2.41637	1.72971
	4.62	2.4226	1.72982
	4.62333	2.41786	1.7344
	4.62667	2.42032	1.73369
	4.63	2.41743	1.73333
	4.63333	2.41909	1.73518
	4.63667	2.41991	1.73697
	4.64	2.41905	1.73193
	4.64333	2.42125	1.73505
	4.64667	2.42284	1.73284
	4.65	2.42276	1.7327
	4.65333	2.42397	1.73655
	4.65667	2.42606	1.73853
	4.66	2.42743	1.73602
	4.66333	2.42344	1.74222
	4.66667	2.42421	1.7386
	4.67	2.43049	1.73942
	4.67333	2.43193	1.74411
	4.67667	2.42387	1.74227
	4.68	2.43075	1.74022
	4.68333	2.42746	1.74328
	4.68667	2.42967	1.74059
	4.69	2.43008	1.73887
	4.69333	2.43075	1.74642
	4.69667	2.42998	1.74356
	4.7	2.43123	1.73924
	4.70333	2.43546	1.74846
	4.70667	2.4356	1.74373
	4.71	2.43424	1.74075
	4.71333	2.43438	1.74661
	4.71667	2.43821	1.74953
	4.72	2.43389	1.74489
	4.72333	2.43785	1.74533
	4.72667	2.44112	1.746
	4.73	2.43768	1.74991
	4.73333	2.44135	1.74965
	4.73667	2.43874	1.74806
	4.74	2.43739	1.74568
	4.74333	2.43841	1.74971
	4.74667	2.44349	1.75016
	4.75	2.44469	1.74787
	4.75333	2.44405	1.75049
	4.75667	2.44201	1.75299
	4.76	2.44522	1.75107
	4.76333	2.4441	1.74955
	4.76667	2.44418	1.75133
	4.77	2.44459	1.75017
	4.77333	2.4472	1.75219
	4.77667	2.44487	1.75263
	4.78	2.4483	1.75771
	4.78333	2.4466	1.75128
	4.78667	2.44631	1.75787
	4.79	2.44579	1.75915
	4.79333	2.44677	1.75886
	4.79667	2.44789	1.75696
	4.8	2.44905	1.76188
	4.80333	2.45098	1.75881
	4.80667	2.45453	1.75704
	4.81	2.4516	1.7597
	4.81333	2.45582	1.76246
	4.81667	2.45091	1.75852
	4.82	2.45569	1.76273
	4.82333	2.45144	1.75999
	4.82667	2.45819	1.76291
	4.83	2.45664	1.76517
	4.83333	2.45621	1.76179
	4.83667	2.45471	1.75989
	4.84	2.45812	1.77001
	4.84333	2.45813	1.76655
	4.84667	2.45961	1.76425
	4.85	2.45716	1.76547
	4.85333	2.46443	1.76219
	4.85667	2.45957	1.76319
	4.86	2.45918	1.76428
	4.86333	2.46213	1.76976
	4.86667	2.46366	1.76268
	4.87	2.46117	1.76895
	4.87333	2.4662	1.76625
	4.87667	2.46265	1.76881
	4.88	2.46106	1.76985
	4.88333	2.46462	1.76925
	4.88667	2.46505	1.77029
	4.89	2.46583	1.77091
	4.89333	2.46959	1.76959
	4.89667	2.46815	1.77039
	4.9	2.46934	1.77188
	4.90333	2.47057	1.77142
	4.90667	2.46628	1.77183
	4.91	2.46709	1.77432
	4.91333	2.47061	1.77358
	4.91667	2.47021	1.77003
	4.92	2.47539	1.77494
	4.92333	2.4726	1.77412
	4.92667	2.47558	1.77503
	4.93	2.47234	1.77374
	4.93333	2.47327	1.77677
	4.93667	2.47502	1.77624
	4.94	2.47618	1.77466
	4.94333	2.47518	1.77635
	4.94667	2.47685	1.77573
	4.95	2.47824	1.7789
	4.95333	2.47725	1.77678
	4.95667	2.47633	1.77596
	4.96	2.47676	1.78219
	4.96333	2.4786	1.77897
	4.96667	2.48453	1.77938
	4.97	2.48107	1.78014
	4.97333	2.48194	1.77474
	4.97667	2.48053	1.78466
	4.98	2.48072	1.78619
	4.98333	2.4829	1.77797
	4.98667	2.481	1.78275
	4.99	2.48806	1.78602
	4.99333	2.4832	1.78202
	4.99667	2.48488	1.78294
	5	2.4855	1.78488
	5.00333	2.48758	1.78352
	5.00667	2.48652	1.78763
	5.01	2.49003	1.7873
	5.01333	2.4917	1.78601
	5.01667	2.49076	1.7819
	5.02	2.48625	1.78816
	5.02333	2.48965	1.78975
	5.02667	2.48986	1.78965
	5.03	2.49134	1.78463
	5.03333	2.49438	1.78603
	5.03667	2.49067	1.78649
	5.04	2.49612	1.79299
	5.04333	2.4918	1.79189
	5.04667	2.49331	1.78703
	5.05	2.49468	1.79036
	5.05333	2.49485	1.79432
	5.05667	2.4894	1.79506
	5.06	2.49807	1.79291
	5.06333	2.49974	1.7929
	5.06667	2.49183	1.79734
	5.07	2.49623	1.79662
	5.07333	2.50199	1.79712
	5.07667	2.49711	1.79709
	5.08	2.49831	1.79281
	5.08333	2.50002	1.7928
	5.08667	2.50137	1.79722
	5.09	2.4974	1.79785
	5.09333	2.49794	1.79982
	5.09667	2.50194	1.79648
	5.1	2.50349	1.79734
	5.10333	2.5034	1.80268
	5.10667	2.49941	1.79759
	5.11	2.50407	1.79869
	5.11333	2.50373	1.80167
	5.11667	2.50441	1.80051
	5.12	2.50854	1.8014
	5.12333	2.50537	1.80241
	5.12667	2.50719	1.80063
	5.13	2.50422	1.80326
	5.13333	2.50923	1.80595
	5.13667	2.5091	1.80117
	5.14	2.51014	1.80067
	5.14333	2.51027	1.79918
	5.14667	2.51152	1.80378
	5.15	2.51309	1.80573
	5.15333	2.51103	1.80572
	5.15667	2.51517	1.80642
	5.16	2.5123	1.8095
	5.16333	2.51426	1.80333
	5.16667	2.51516	1.8096
	5.17	2.51259	1.80906
	5.17333	2.51562	1.80771
	5.17667	2.51765	1.81017
	5.18	2.51337	1.80737
	5.18333	2.51439	1.81377
	5.18667	2.51635	1.80964
	5.19	2.51665	1.80685
	5.19333	2.51343	1.80943
	5.19667	2.51642	1.80971
	5.2	2.51795	1.80945
	5.20333	2.51982	1.81017
	5.20667	2.52195	1.81294
	5.21	2.52102	1.80995
	5.21333	2.52256	1.81433
	5.21667	2.52261	1.81227
	5.22	2.52444	1.81602
	5.22333	2.521	1.81118
	5.22667	2.5226	1.81452
	5.23	2.5245	1.81486
	5.23333	2.52515	1.81041
	5.23667	2.52366	1.81951
	5.24	2.52745	1.81543
	5.24333	2.52813	1.81951
	5.24667	2.52933	1.81615
	5.25	2.52872	1.81685
	5.25333	2.52802	1.81781
	5.25667	2.52288	1.82162
	5.26	2.53076	1.81899
	5.26333	2.53382	1.82047
	5.26667	2.52853	1.81793
	5.27	2.53108	1.81661
	5.27333	2.53356	1.81819
	5.27667	2.53287	1.82051
	5.28	2.5346	1.82195
	5.28333	2.52995	1.82622
	5.28667	2.53421	1.82227
	5.29	2.53956	1.82033
	5.29333	2.53495	1.82526
	5.29667	2.53734	1.8224
	5.3	2.5368	1.82444
	5.30333	2.53523	1.82675
	5.30667	2.5377	1.82584
	5.31	2.5356	1.82655
	5.31333	2.53427	1.82806
	5.31667	2.54099	1.82285
	5.32	2.54183	1.82619
	5.32333	2.54068	1.82704
	5.32667	2.53663	1.82736
	5.33	2.53965	1.82835
	5.33333	2.54464	1.82863
	5.33667	2.54414	1.82601
	5.34	2.54357	1.8315
	5.34333	2.54645	1.82638
	5.34667	2.54521	1.82594
	5.35	2.54742	1.83143
	5.35333	2.54534	1.83232
	5.35667	2.54741	1.83151
	5.36	2.54287	1.82956
	5.36333	2.54468	1.8297
	5.36667	2.54427	1.83601
	5.37	2.54863	1.83475
	5.37333	2.54519	1.83292
	5.37667	2.54993	1.83646
	5.38	2.54707	1.83223
	5.38333	2.55365	1.83586
	5.38667	2.5527	1.83145
	5.39	2.54938	1.83645
	5.39333	2.54966	1.83464
	5.39667	2.55218	1.84099
	5.4	2.55248	1.8333
	5.40333	2.55498	1.83268
	5.40667	2.55416	1.83704
	5.41	2.55438	1.8422
	5.41333	2.54924	1.83626
	5.41667	2.55556	1.84169
	5.42	2.55475	1.83846
	5.42333	2.55621	1.83786
	5.42667	2.55575	1.83945
	5.43	2.55823	1.84039
	5.43333	2.55327	1.83873
	5.43667	2.55995	1.84176
	5.44	2.55862	1.84215
	5.44333	2.56046	1.84498
	5.44667	2.55722	1.84219
	5.45	2.56177	1.84075
	5.45333	2.55891	1.84063
	5.45667	2.56179	1.8454
	5.46	2.56066	1.84242
	5.46333	2.55966	1.84706
	5.46667	2.5641	1.84616
	5.47	2.56329	1.84114
	5.47333	2.56527	1.84184
	5.47667	2.55995	1.84865
	5.48	2.56568	1.84694
	5.48333	2.55889	1.84802
	5.48667	2.56531	1.84345
	5.49	2.56921	1.84502
	5.49333	2.56532	1.84589
	5.49667	2.56997	1.85027
	5.5	2.56972	1.84859
	5.50333	2.56908	1.85125
	5.50667	2.56766	1.84722
	5.51	2.56812	1.84897
	5.51333	2.56892	1.84861
	5.51667	2.57395	1.84969
	5.52	2.56876	1.84782
	5.52333	2.56939	1.84812
	5.52667	2.56987	1.84926
	5.53	2.57326	1.85084
	5.53333	2.57337	1.85183
	5.53667	2.5697	1.85005
	5.54	2.56914	1.85256
	5.54333	2.57163	1.85402
	5.54667	2.57763	1.8505
	5.55	2.57906	1.85291
	5.55333	2.57595	1.85173
	5.55667	2.57808	1.85519
	5.56	2.57089	1.85621
	5.56333	2.57833	1.85227
	5.56667	2.57835	1.86206
	5.57	2.5794	1.85497
	5.57333	2.57828	1.85464
	5.57667	2.57929	1.85691
	5.58	2.58019	1.85591
	5.58333	2.57957	1.85904
	5.58667	2.5842	1.85873
	5.59	2.5771	1.85881
	5.59333	2.58098	1.85841
	5.59667	2.58235	1.86163
	5.6	2.5821	1.85854
	5.60333	2.58456	1.86315
	5.60667	2.58545	1.86497
	5.61	2.58789	1.8633
	5.61333	2.58761	1.86087
	5.61667	2.58704	1.86434
	5.62	2.58605	1.86179
	5.62333	2.58869	1.86259
	5.62667	2.5867	1.86388
	5.63	2.58183	1.86823
	5.63333	2.58783	1.86639
	5.63667	2.59262	1.86762
	5.64	2.58736	1.86578
	5.64333	2.58792	1.86515
	5.64667	2.58897	1.8631
	5.65	2.59041	1.86628
	5.65333	2.58832	1.86763
	5.65667	2.5949	1.86594
	5.66	2.59046	1.87098
	5.66333	2.59336	1.86909
	5.66667	2.5946	1.86989
	5.67	2.59461	1.86919
	5.67333	2.59198	1.86546
	5.67667	2.59795	1.87202
	5.68	2.5949	1.87225
	5.68333	2.59829	1.87376
	5.68667	2.59329	1.87094
	5.69	2.59581	1.87214
	5.69333	2.59578	1.87161
	5.69667	2.59905	1.86895
	5.7	2.60123	1.86992
	5.70333	2.60342	1.87049
	5.70667	2.60195	1.87504
	5.71	2.60358	1.87412
	5.71333	2.60175	1.87264
	5.71667	2.59976	1.87516
	5.72	2.60052	1.876
	5.72333	2.59874	1.87797
	5.72667	2.6015	1.87626
	5.73	2.60662	1.87756
	5.73333	2.60571	1.88106
	5.73667	2.60055	1.87996
	5.74	2.60626	1.87914
	5.74333	2.6037	1.87612
	5.74667	2.60805	1.87421
	5.75	2.6076	1.8788
	5.75333	2.60611	1.87802
	5.75667	2.60661	1.87929
	5.76	2.60669	1.88161
	5.76333	2.60057	1.88044
	5.76667	2.61392	1.88567
	5.77	2.60843	1.88596
	5.77333	2.61219	1.88372
	5.77667	2.60717	1.87976
	5.78	2.6159	1.8836
	5.78333	2.61246	1.88238
	5.78667	2.61535	1.88408
	5.79	2.6128	1.88699
	5.79333	2.61016	1.88373
	5.79667	2.60968	1.88687
	5.8	2.6137	1.88593
	5.80333	2.61812	1.88559
	5.80667	2.61424	1.88403
	5.81	2.61807	1.88515
	5.81333	2.61677	1.88683
	5.81667	2.61718	1.88251
	5.82	2.6161	1.88653
	5.82333	2.61581	1.88711
	5.82667	2.61677	1.89174
	5.83	2.61684	1.88922
	5.83333	2.62173	1.893
	5.83667	2.6167	1.89075
	5.84	2.61733	1.88702
	5.84333	2.61707	1.88992
	5.84667	2.62432	1.88917
	5.85	2.6232	1.89198
	5.85333	2.62065	1.88963
	5.85667	2.62323	1.89102
	5.86	2.62239	1.89098
	5.86333	2.62365	1.89101
	5.86667	2.62329	1.89776
	5.87	2.62425	1.88986
	5.87333	2.62385	1.89513
	5.87667	2.62465	1.89185
	5.88	2.62554	1.89416
	5.88333	2.62549	1.89409
	5.88667	2.62532	1.89407
	5.89	2.6253	1.89832
	5.89333	2.62786	1.89594
	5.89667	2.63078	1.89264
	5.9	2.6326	1.90281
	5.90333	2.62435	1.89783
	5.90667	2.62799	1.89747
	5.91	2.63029	1.89668
	5.91333	2.63036	1.89722
	5.91667	2.63196	1.90063
	5.92	2.62916	1.90059
	5.92333	2.63533	1.89751
	5.92667	2.63211	1.89687
	5.93	2.6369	1.89671
	5.93333	2.63182	1.90169
	5.93667	2.62908	1.90147
	5.94	2.63531	1.89927
	5.94333	2.63357	1.90312
	5.94667	2.63484	1.90168
	5.95	2.6339	1.90002
	5.95333	2.6354	1.90307
	5.95667	2.63922	1.90122
	5.96	2.6368	1.90532
	5.96333	2.64021	1.90137
	5.96667	2.64106	1.90452
	5.97	2.6381	1.90774
	5.97333	2.63832	1.90702
	5.97667	2.63651	1.90696
	5.98	2.63984	1.90679
	5.98333	2.63761	1.90543
	5.98667	2.64124	1.90776
	5.99	2.64066	1.90378
	5.99333	2.64058	1.90387
	5.99667	2.64311	1.90392
	6	2.64354	1.90669
	6.00333	2.64792	1.90614
	6.00667	2.64275	1.90598
	6.01	2.64128	1.90347
	6.01333	2.64372	1.91093
	6.01667	2.644	1.91161
	6.02	2.64524	1.9062
	6.02333	2.6458	1.90549
	6.02667	2.64752	1.91062
	6.03	2.64893	1.91135
	6.03333	2.64347	1.90979
	6.03667	2.64605	1.91165
	6.04	2.65103	1.91181
	6.04333	2.6499	1.90975
	6.04667	2.64996	1.91178
	6.05	2.64896	1.91309
	6.05333	2.65205	1.9154
	6.05667	2.65119	1.91185
	6.06	2.65029	1.91178
	6.06333	2.65389	1.9156
	6.06667	2.66012	1.9115
	6.07	2.64995	1.91711
	6.07333	2.65316	1.91915
	6.07667	2.65475	1.91647
	6.08	2.65495	1.9172
	6.08333	2.65128	1.91587
	6.08667	2.65582	1.91698
	6.09	2.66145	1.91953
	6.09333	2.6551	1.91396
	6.09667	2.65684	1.91725
	6.1	2.65937	1.91763
	6.10333	2.6586	1.9144
	6.10667	2.66014	1.91922
	6.11	2.6592	1.91785
	6.11333	2.66492	1.92476
	6.11667	2.66456	1.92115
	6.12	2.66355	1.921
	6.12333	2.66032	1.92036
	6.12667	2.65917	1.92216
	6.13	2.66262	1.91967
	6.13333	2.66245	1.92257
	6.13667	2.66032	1.92538
	6.14	2.66295	1.92206
	6.14333	2.66136	1.92575
	6.14667	2.66367	1.92627
	6.15	2.66541	1.92475
	6.15333	2.66476	1.92499
	6.15667	2.66569	1.92514
	6.16	2.67044	1.92361
	6.16333	2.66516	1.93031
	6.16667	2.66433	1.92621
	6.17	2.66488	1.92619
	6.17333	2.66804	1.92774
	6.17667	2.6698	1.93165
	6.18	2.67476	1.93103
	6.18333	2.66852	1.9346
	6.18667	2.67041	1.9314
	6.19	2.67282	1.92693
	6.19333	2.67404	1.93204
	6.19667	2.66972	1.93052
	6.2	2.67228	1.93085
	6.20333	2.67347	1.93146
	6.20667	2.67561	1.93289
	6.21	2.67333	1.9339
	6.21333	2.67819	1.9317
	6.21667	2.6752	1.93268
	6.22	2.67101	1.9297
	6.22333	2.67469	1.93384
	6.22667	2.67556	1.93186
	6.23	2.67422	1.93144
	6.23333	2.67989	1.938
	6.23667	2.67632	1.93644
	6.24	2.67664	1.93598
	6.24333	2.67866	1.93698
	6.24667	2.67506	1.94025
	6.25	2.67698	1.93749
	6.25333	2.67949	1.93687
	6.25667	2.68017	1.93345
	6.26	2.68343	1.94143
	6.26333	2.68168	1.93833
	6.26667	2.6798	1.94232
	6.27	2.68182	1.94121
	6.27333	2.68159	1.93715
	6.27667	2.68225	1.94022
	6.28	2.68228	1.93673
	6.28333	2.68418	1.93939
	6.28667	2.68211	1.93669
	6.29	2.68285	1.94121
	6.29333	2.6884	1.94168
	6.29667	2.68359	1.94048
	6.3	2.6861	1.94261
	6.30333	2.68736	1.94613
	6.30667	2.68853	1.94372
	6.31	2.6891	1.94614
	6.31333	2.68689	1.94053
	6.31667	2.69147	1.94708
	6.32	2.69007	1.9475
	6.32333	2.68912	1.94308
	6.32667	2.68689	1.94273
	6.33	2.68923	1.94512
	6.33333	2.69197	1.94643
	6.33667	2.69113	1.94693
	6.34	2.69251	1.94886
	6.34333	2.69102	1.94493
	6.34667	2.69407	1.94685
	6.35	2.70027	1.95116
	6.35333	2.69493	1.9479
	6.35667	2.69631	1.94929
	6.36	2.69017	1.94934
	6.36333	2.69959	1.94746
	6.36667	2.69484	1.9505
	6.37	2.69518	1.95025
	6.37333	2.69579	1.94932
	6.37667	2.68992	1.9498
	6.38	2.69536	1.95351
	6.38333	2.69834	1.95132
	6.38667	2.70071	1.94902
	6.39	2.69928	1.95383
	6.39333	2.69654	1.94992
	6.39667	2.69412	1.95575
	6.4	2.69826	1.95218
	6.40333	2.69915	1.95355
	6.40667	2.70134	1.95493
	6.41	2.69894	1.95155
	6.41333	2.70097	1.96056
	6.41667	2.70148	1.95382
	6.42	2.70403	1.95291
	6.42333	2.70253	1.96009
	6.42667	2.70887	1.95972
	6.43	2.70419	1.95449
	6.43333	2.70449	1.95892
	6.43667	2.70249	1.9583
	6.44	2.70383	1.95572
	6.44333	2.69645	1.95384
	6.44667	2.70903	1.95893
	6.45	2.70777	1.95661
	6.45333	2.70428	1.95806
	6.45667	2.70764	1.95673
	6.46	2.7108	1.95502
	6.46333	2.70404	1.96116
	6.46667	2.70861	1.96119
	6.47	2.71053	1.95677
	6.47333	2.71283	1.96215
	6.47667	2.70746	1.96081
	6.48	2.71127	1.96304
	6.48333	2.71201	1.9579
	6.48667	2.71119	1.96382
	6.49	2.71197	1.96095
	6.49333	2.71101	1.96137
	6.49667	2.71215	1.96578
	6.5	2.71025	1.96311
	6.50333	2.70908	1.96187
	6.50667	2.71354	1.96252
	6.51	2.71306	1.96636
	6.51333	2.71159	1.95916
	6.51667	2.71334	1.96576
	6.52	2.71621	1.96896
	6.52333	2.71951	1.96558
	6.52667	2.71524	1.96532
	6.53	2.71597	1.96463
	6.53333	2.71775	1.96357
	6.53667	2.71893	1.96617
	6.54	2.72129	1.96774
	6.54333	2.71694	1.96731
	6.54667	2.7176	1.97204
	6.55	2.71958	1.96994
	6.55333	2.72274	1.96624
	6.55667	2.7212	1.96864
	6.56	2.72023	1.97257
	6.56333	2.71999	1.9712
	6.56667	2.71952	1.96678
	6.57	2.72102	1.97195
	6.57333	2.72035	1.97267
	6.57667	2.72734	1.9691
	6.58	2.72597	1.97294
	6.58333	2.72165	1.97121
	6.58667	2.72641	1.97636
	6.59	2.72662	1.97186
	6.59333	2.72379	1.97334
	6.59667	2.72344	1.97271
	6.6	2.72186	1.97209
	6.60333	2.72891	1.97189
	6.60667	2.72935	1.97792
	6.61	2.72839	1.9701
	6.61333	2.73029	1.97287
	6.61667	2.73219	1.97558
	6.62	2.72622	1.97068
	6.62333	2.73396	1.97835
	6.62667	2.72618	1.97501
	6.63	2.73078	1.98071
	6.63333	2.72995	1.97802
	6.63667	2.73796	1.97878
	6.64	2.7285	1.97932
	6.64333	2.73066	1.98251
	6.64667	2.73224	1.97768
	6.65	2.73544	1.97594
	6.65333	2.73572	1.98343
	6.65667	2.73729	1.97958
[truncated: 34,399 more rows]
