# Supplementary material for: Evolution towards simplicity in bacterial small heat shock protein system
Source: eLife. 2023 Dec 8;12:RP89813. doi: 10.7554/eLife.89813 (PMC10708888; doi:10.7554/eLife.89813)
Supplement: Figure 5—figure supplement 5—source data 2. [file elife-89813-fig5-figsupp5-data2.xlsx]

## Sheet: Arkusz1
sHsp concentration [M]	A0 ACD		A0 66 109 ACD		IbpA E.coli ACD		IbpA E.coli
	Mean hydrodynamic diameter [nm]	SD	Mean hydrodynamic diameter [nm]	SD	Mean hydrodynamic diameter [nm]	SD	Mean hydrodynamic diameter [nm]	SD
0	2455	1239	2455	1239	2455	1239	2455	1239
5	4025	2357	3663	1805	5226	3276	64.47	27.79
10	3848	2093	3360	1582	6421	4321	75.59	36.92
