# Supplementary material for: Evolution towards simplicity in bacterial small heat shock protein system
Source: eLife. 2023 Dec 8;12:RP89813. doi: 10.7554/eLife.89813 (PMC10708888; doi:10.7554/eLife.89813)
Supplement: Figure 5—figure supplement 5—source data 3. [file elife-89813-fig5-figsupp5-data3.xlsx]

## Sheet: Arkusz1
	luciferase activity (repeat 1)	luciferase activity (repeat 2)	luciferase activity (repeat 3)
No sHsps	1.67976e+07	12457909	14963333
A0 ACD	2859997	2400552	2.07819e+06
A0 Q66H G109D ACD	1.66999e+07	1.42252e+07	1.5846e+07
native	86357628	9.26565e+07	92138092
