# Supplementary material for: Evolution towards simplicity in bacterial small heat shock protein system
Source: eLife. 2023 Dec 8;12:RP89813. doi: 10.7554/eLife.89813 (PMC10708888; doi:10.7554/eLife.89813)
Supplement: Figure 5—source data 2. [file elife-89813-fig5-data2.xlsx]

## Sheet: Arkusz1
		Maximum response during binding to His6-SUMO-C- terminal peptide						Maximum response during nonspecific binding to His6-SUMO
		A0 ACD			A0 Q66H G109D ACD			A0 ACD	A0 Q66H G109D ACD
	ACD concentration [uM]	repeat 1	repeat2	repeat3	repeat 1	repeat2	repeat3
	40	4.85755	5.09757	4.82715	4.40013	4.43279	4.25371	1.11505	0.586758
	20	4.51815	4.86447	4.44349	4.00901	4.49926	4.37623	0.853284	0.522751
	10	3.73494	4.25917	3.63762	2.79004	3.65177	3.44137	0.616385	0.350608
	5	2.63559	2.82559	2.63072	1.08749	1.44095	1.06793	0.398785	0.244801
	2.5	1.2239	1.23931	1.2274	0.329138	0.224704	0.250101	0.206118	0.0985284
	1.25	0.518421	0.174575	0.289675	0.257128	0.168193	0.1869	0.132894	0.00567198
	0.625	0.0120128	0.0141742	0.166666	0.0016761	0.00579063	0.0975855	-0.0499885	-0.112164
