# Supplementary material for: Evolution towards simplicity in bacterial small heat shock protein system
Source: eLife. 2023 Dec 8;12:RP89813. doi: 10.7554/eLife.89813 (PMC10708888; doi:10.7554/eLife.89813)
Supplement: Figure 5—source data 3. — Different repeats as well as curves representing nonspecific binding of α–crystallin domains (ACDs) to His6-SUMO are in separate sheets. Repeat 1 was used as a representative binding curves shown in Figure 5—figure supplement 3. [file elife-89813-fig5-data3.xlsx]

## Sheet: Repeat 1
		Repeat used as representative data for Fig.5 - figure supplement 3;curves are shown on the graph after substraction of response for 0 uM ACD
		Response [nm]
	Time [min]	40uM A0 ACD WT	20 uM A0 ACD WT	10uM A0 ACD WT	5uM A0 ACD WT	2.5uM A0 ACD WT	1.25uM A0 ACD WT	0.625uM A0 ACD WT	0uM A0 ACD WT	40uM A0 Q66H G109D ACD	20 uM A0 Q66H G109D ACD	10uM A0 Q66H G109D ACD	5uM A0 Q66H G109D ACD	2.5uM A0 Q66H G109D ACD	1.25uM A0 Q66H G109D ACD	0.625uM A0 Q66H G109D ACD	0uM A0 Q66H G109D ACD
	0	0.41818	0.24225	0.0917574	0.053954	0.0171513	0.0107953	0.0104579	0.0120128	0.201633	0.100619	0.0578292	0.0308312	0.00515655	0.0233096	0.00404547	0.00119271
	0.003333	0.6424	0.369983	0.171522	0.0900714	0.028989	0.0207073	0.011398	0.00731486	0.294197	0.156051	0.0942963	0.0510427	0.0109736	0.0263305	0.0140855	0.00030508
	0.006667	0.794501	0.467515	0.23488	0.119746	0.0466086	0.0314314	0.0165829	0.00632709	0.370211	0.202843	0.127552	0.0713169	0.0261346	0.0326911	0.0160692	-0.00369088
	0.01	0.912806	0.547985	0.294947	0.152266	0.0674267	0.0367763	0.0211261	0.00971538	0.427414	0.239959	0.151922	0.0890467	0.037063	0.0368123	0.0188907	-0.0032833
	0.013333	1.00271	0.608944	0.341218	0.173564	0.0837139	0.0426478	0.0202184	0.00670403	0.482983	0.270996	0.177779	0.10069	0.0447659	0.0407746	0.0247261	-0.0015224
	0.016667	1.0722	0.658228	0.378554	0.198357	0.0966224	0.0470013	0.0230898	0.00733548	0.518751	0.298892	0.192751	0.111756	0.0579402	0.0469601	0.0198695	0.00070729
	0.02	1.129	0.704161	0.415259	0.214028	0.106918	0.0551279	0.0280898	0.00743711	0.560281	0.32305	0.20844	0.129735	0.0636639	0.0533836	0.0260546	-0.00357095
	0.023333	1.18247	0.739591	0.441225	0.236248	0.118696	0.0611258	0.0311535	0.00694531	0.594404	0.342355	0.225315	0.134401	0.0701473	0.0526907	0.025285	-0.00301401
	0.026667	1.22319	0.77722	0.462793	0.250236	0.128399	0.0607023	0.0304453	0.00330997	0.621002	0.365217	0.23763	0.145414	0.0752671	0.0592265	0.0294899	-0.00182746
	0.03	1.26187	0.80437	0.488091	0.272609	0.134734	0.0706429	0.0355191	0.00626504	0.650331	0.383808	0.250702	0.155847	0.0863242	0.0650369	0.0284297	0.0016761
	0.033333	1.29244	0.83161	0.512738	0.279439	0.142209	0.0738054	0.034549	0.00579745	0.679459	0.398257	0.261128	0.164811	0.0915458	0.0683122	0.0270875	-0.00236009
	0.036667	1.32795	0.858724	0.536417	0.296446	0.152285	0.073978	0.0376008	0.00686049	0.700641	0.417287	0.267162	0.171551	0.0947444	0.0688741	0.0318584	0.00060012
	0.04	1.35102	0.873979	0.546625	0.307686	0.161748	0.0790373	0.0338022	0.0101161	0.722141	0.42951	0.278673	0.178621	0.0981	0.079064	0.0328731	-0.00535111
	0.043333	1.37703	0.899528	0.566692	0.321214	0.167241	0.0853015	0.0360818	0.00585204	0.746811	0.4415	0.291329	0.185385	0.108203	0.0758117	0.0384984	-0.00026915
	0.046667	1.39696	0.918872	0.580868	0.328114	0.175897	0.0908393	0.0326715	0.00790411	0.765799	0.451946	0.300115	0.191969	0.11203	0.0794341	0.0340164	-0.00403635
	0.05	1.42536	0.937146	0.595625	0.341147	0.182486	0.0948684	0.0407751	0.00884271	0.779802	0.469385	0.305567	0.19683	0.11718	0.0805966	0.0367392	-0.00400845
	0.053333	1.44562	0.953058	0.608067	0.347212	0.19021	0.0983364	0.0409526	0.00384003	0.802642	0.473907	0.313581	0.202275	0.119066	0.0874427	0.034212	-0.001119
	0.056667	1.46544	0.968771	0.623262	0.356691	0.195707	0.0997985	0.0400759	0.00202256	0.819227	0.488738	0.319537	0.212325	0.123882	0.0867461	0.0400723	-0.00010465
	0.06	1.48274	0.978998	0.627676	0.367711	0.202548	0.103134	0.0403809	0.00334394	0.834877	0.499468	0.328703	0.213618	0.126114	0.0875237	0.0388387	-0.00393734
	0.063333	1.501	0.995334	0.642439	0.375598	0.20653	0.106735	0.0437809	0.00426167	0.850161	0.510508	0.334128	0.216982	0.133213	0.0946302	0.0377144	4.615e-05
	0.066667	1.51862	1.00914	0.658642	0.38393	0.213643	0.105417	0.0434467	0.00738424	0.86496	0.52145	0.339537	0.223151	0.133634	0.0958595	0.0427266	-0.0037481
	0.07	1.53269	1.02551	0.664273	0.387865	0.216857	0.114299	0.0473893	0.00527692	0.88091	0.529221	0.341945	0.22425	0.135922	0.0975566	0.0411943	-0.00210188
	0.073333	1.54902	1.03118	0.673484	0.397724	0.225503	0.115273	0.0464111	0.00881779	0.897838	0.539976	0.355146	0.231634	0.13983	0.102144	0.0409096	-0.00649099
	0.076667	1.56426	1.04812	0.684253	0.40511	0.22474	0.119074	0.0492796	0.00263405	0.910126	0.545993	0.357783	0.233147	0.146424	0.101914	0.0403575	-0.00322012
	0.08	1.57419	1.05617	0.693509	0.411831	0.231602	0.121141	0.0508867	0.00165129	0.923011	0.554438	0.357694	0.237874	0.147276	0.104687	0.045696	-0.00058208
	0.083333	1.58756	1.06691	0.699602	0.418458	0.235447	0.126599	0.045134	0.00757748	0.939216	0.562818	0.370819	0.239569	0.14959	0.105934	0.042085	-0.0036544
	0.086667	1.60217	1.07616	0.709331	0.423278	0.236173	0.124039	0.0499268	0.00778079	0.952797	0.572413	0.370806	0.242886	0.152929	0.109755	0.0448919	-0.00670687
	0.09	1.62036	1.09063	0.715405	0.4271	0.245187	0.129057	0.0496752	0.0028767	0.959868	0.580783	0.376258	0.25294	0.151032	0.114967	0.0440168	-0.00450347
	0.093333	1.6301	1.09717	0.720988	0.432051	0.245145	0.129071	0.0471266	0.00352478	0.975124	0.589463	0.383414	0.254299	0.157994	0.114777	0.040093	-0.00013802
	0.096667	1.63856	1.10804	0.728685	0.438788	0.248396	0.134001	0.0493324	0.00673014	0.987634	0.597098	0.380785	0.253607	0.158353	0.114256	0.045281	-0.0057262
	0.1	1.65051	1.11631	0.739824	0.444011	0.25894	0.136829	0.0532691	0.00402904	0.997946	0.604312	0.387772	0.254361	0.164542	0.118479	0.0466615	-0.0025867
	0.103333	1.66419	1.12558	0.747303	0.452745	0.262535	0.140077	0.051009	0.00330752	1.01164	0.609968	0.390717	0.260227	0.165698	0.117072	0.0463663	-0.0058646
	0.106667	1.67462	1.12921	0.753455	0.454632	0.264151	0.143869	0.0491604	0.00376123	1.02016	0.616567	0.394835	0.263675	0.165061	0.120703	0.0437716	-0.0066605
	0.11	1.68789	1.13781	0.754548	0.459939	0.263498	0.145323	0.0562773	0.00363332	1.03604	0.619961	0.398137	0.266023	0.170636	0.120809	0.047217	-0.0053908
	0.113333	1.69703	1.1449	0.766128	0.4673	0.269101	0.144015	0.0546732	0.00082719	1.04503	0.625086	0.401041	0.267489	0.166912	0.123012	0.0442892	-0.00561825
	0.116667	1.70186	1.15786	0.771459	0.471475	0.275925	0.145089	0.0531537	0.00254959	1.05548	0.637749	0.408547	0.270704	0.173501	0.127849	0.0495784	-0.00412879
	0.12	1.72155	1.166	0.777769	0.472134	0.275328	0.150296	0.0540431	0.0047977	1.06958	0.639933	0.406358	0.269856	0.173883	0.127992	0.0431919	-0.00418899
	0.123333	1.72914	1.17122	0.782196	0.481523	0.279351	0.150456	0.0536274	0.00673008	1.07411	0.648456	0.412262	0.275746	0.176142	0.132005	0.0498777	-0.0056142
	0.126667	1.74191	1.17715	0.785177	0.483298	0.283502	0.153641	0.0543869	-0.00130534	1.08472	0.652694	0.42114	0.275764	0.181529	0.135588	0.0501158	-0.00347773
	0.13	1.74926	1.1855	0.789779	0.484343	0.287431	0.154347	0.0577471	-0.00226402	1.09565	0.662312	0.417394	0.276921	0.177857	0.133132	0.0501177	-0.00584422
	0.133333	1.75365	1.19146	0.797582	0.490938	0.287963	0.15841	0.055661	0.00208586	1.10266	0.664152	0.426057	0.285918	0.184807	0.136046	0.0494493	-0.00830446
	0.136667	1.76815	1.19931	0.800767	0.49667	0.295402	0.161479	0.0613273	0.0110244	1.11519	0.671975	0.42762	0.280392	0.18376	0.135952	0.0495684	-0.00514845
	0.14	1.78088	1.2044	0.804954	0.497195	0.293754	0.160935	0.0566161	0.00383955	1.12517	0.677741	0.429126	0.282237	0.183237	0.141746	0.0483602	-0.00274835
	0.143333	1.7918	1.21474	0.808158	0.499204	0.298493	0.161999	0.0571726	0.00331265	1.1384	0.680795	0.430983	0.288346	0.188317	0.139553	0.0504075	-0.0025718
	0.146667	1.80049	1.2237	0.816308	0.50503	0.302596	0.166842	0.0573342	0.00606602	1.14753	0.68154	0.436461	0.289809	0.188651	0.140767	0.0488822	-0.00829713
	0.15	1.8047	1.21986	0.821027	0.506562	0.299072	0.1684	0.0562106	0.00376749	1.15624	0.694185	0.438484	0.287062	0.193413	0.142384	0.0521949	-0.0057256
	0.153333	1.81352	1.23143	0.827099	0.506382	0.301178	0.168135	0.0592056	0.00387949	1.16045	0.697831	0.438085	0.292732	0.192484	0.146489	0.0526848	-0.00815336
	0.156667	1.81882	1.23881	0.828979	0.514847	0.308343	0.170163	0.0621461	-6.92e-05	1.17553	0.700644	0.444923	0.294274	0.192566	0.149357	0.0516137	-0.0072603
	0.16	1.82475	1.24279	0.830822	0.511768	0.311923	0.173264	0.0614825	-0.00040859	1.18119	0.709584	0.447254	0.295161	0.197685	0.149399	0.0541868	-0.00607965
	0.163333	1.84012	1.24827	0.838232	0.522662	0.309501	0.174047	0.0603145	0.00357294	1.18885	0.711519	0.448783	0.29968	0.198484	0.146918	0.0470662	-0.00163637
	0.166667	1.84509	1.2561	0.84477	0.528764	0.312075	0.175396	0.0642339	0.00193781	1.19691	0.715015	0.447357	0.303087	0.19767	0.150066	0.05212	-0.00821666
	0.17	1.85848	1.26051	0.845101	0.530908	0.313649	0.176599	0.0631195	0.00139725	1.20908	0.726878	0.451885	0.30275	0.200756	0.152839	0.0498726	-0.00588671
	0.173333	1.86238	1.26473	0.845159	0.528667	0.316371	0.179185	0.0621745	-0.00163633	1.21436	0.723223	0.45689	0.302928	0.199847	0.148111	0.0494221	-0.00598548
	0.176667	1.87047	1.26977	0.852502	0.534005	0.320111	0.17978	0.06264	0.00344849	1.22984	0.72783	0.457659	0.308519	0.200572	0.154989	0.0485793	-0.00485287
	0.18	1.88051	1.27268	0.857348	0.538673	0.324986	0.188091	0.065822	0.00523651	1.23563	0.737085	0.458777	0.303012	0.202734	0.15087	0.0498788	-0.00656543
	0.183333	1.88804	1.28048	0.85626	0.537924	0.323055	0.177736	0.0666986	0.00501007	1.2432	0.743504	0.458272	0.306866	0.203306	0.154632	0.0541655	-0.009181
	0.186667	1.89433	1.28932	0.86144	0.541821	0.323989	0.182375	0.0622731	0.00317359	1.24947	0.743967	0.46667	0.310098	0.204764	0.156627	0.0502771	-0.00571046
	0.19	1.90304	1.28993	0.865378	0.541894	0.325956	0.187069	0.0626956	0.00158036	1.25446	0.750546	0.471651	0.313068	0.207313	0.154392	0.053864	-0.00762884
	0.193333	1.91379	1.29597	0.868177	0.546029	0.32747	0.193341	0.0655853	0.00420803	1.26769	0.754963	0.468617	0.310864	0.208936	0.157581	0.0532501	-0.00716386
	0.196667	1.91666	1.30636	0.872812	0.543285	0.332264	0.190905	0.0672248	0.0043658	1.27345	0.753949	0.471388	0.314823	0.207612	0.15849	0.0526034	-0.00802265
	0.2	1.92301	1.30695	0.875235	0.551412	0.33303	0.190567	0.0667593	0.00257915	1.27883	0.766003	0.477001	0.317578	0.213254	0.163283	0.0599829	-0.00624833
	0.203333	1.93565	1.31027	0.879865	0.55204	0.3356	0.195276	0.0625388	0.00258845	1.29064	0.768179	0.475029	0.315165	0.21209	0.161494	0.0557356	-0.00859455
	0.206667	1.94058	1.31847	0.881354	0.555485	0.33746	0.196792	0.0702166	9.739e-05	1.3	0.77245	0.482035	0.318336	0.212455	0.1609	0.0568466	-0.00886712
	0.21	1.9499	1.32414	0.886694	0.558831	0.338851	0.196999	0.07056	0.00367993	1.30563	0.776989	0.482088	0.319044	0.210308	0.164496	0.0597671	-0.00371031
	0.213333	1.95352	1.32491	0.890831	0.563059	0.342389	0.202627	0.0644973	0.00275737	1.31547	0.780725	0.481095	0.317673	0.213297	0.16407	0.0547099	-0.00744955
	0.216667	1.96189	1.33072	0.89334	0.562549	0.341571	0.196852	0.0672442	6.896e-05	1.32248	0.785746	0.487599	0.323566	0.217142	0.162927	0.0513115	-0.00999174
	0.22	1.96867	1.33634	0.896979	0.56512	0.345156	0.200187	0.0717786	-0.00069046	1.32952	0.78727	0.490444	0.319937	0.216447	0.166658	0.0566205	-0.00486807
	0.223333	1.97692	1.3398	0.898719	0.563412	0.345828	0.200547	0.0709004	0.00238615	1.33845	0.794476	0.48824	0.326505	0.218135	0.165634	0.0552062	-0.0063682
	0.226667	1.98155	1.34615	0.901108	0.569991	0.34561	0.201309	0.0685751	0.00258154	1.34594	0.797448	0.486699	0.327868	0.218982	0.166634	0.0602795	-0.00675271
	0.23	1.99331	1.34727	0.9012	0.571746	0.344887	0.205723	0.0708983	0.00588167	1.35494	0.801525	0.495153	0.328973	0.215883	0.169141	0.0514597	-0.00894711
	0.233333	1.99789	1.35143	0.906693	0.572971	0.348446	0.208152	0.0675311	0.00099856	1.36046	0.802856	0.49439	0.322104	0.220419	0.168774	0.0547858	-0.00715397
	0.236667	2.00089	1.35771	0.91059	0.577617	0.346817	0.204405	0.0667366	-0.00133854	1.36529	0.804499	0.497988	0.328806	0.216323	0.167451	0.0584167	-0.00409673
	0.24	2.01108	1.36043	0.917555	0.576954	0.354142	0.210017	0.0679577	0.00103956	1.37406	0.811197	0.49768	0.33084	0.221704	0.175474	0.0595979	-0.00491254
	0.243333	2.01492	1.36653	0.919899	0.580694	0.355144	0.208709	0.074171	0.00037628	1.38202	0.816381	0.499974	0.333863	0.224791	0.173415	0.057555	-0.00985287
	0.246667	2.02504	1.37271	0.920425	0.577708	0.354309	0.208671	0.072104	-0.00204188	1.39092	0.817723	0.502905	0.32933	0.221339	0.175284	0.0554112	-0.0119398
	0.25	2.02774	1.3752	0.921001	0.584496	0.353784	0.21112	0.0722354	-0.00186503	1.39788	0.823946	0.500997	0.329448	0.220745	0.176468	0.0584786	-0.00717739
	0.253333	2.03973	1.3773	0.927178	0.585845	0.358222	0.214991	0.0746288	-0.00207216	1.40564	0.828067	0.505178	0.334574	0.226341	0.174978	0.05849	-0.00616578
	0.256667	2.04448	1.38329	0.929112	0.587748	0.360681	0.213909	0.0749038	-0.00156522	1.41059	0.829266	0.509226	0.332726	0.221469	0.177642	0.0562054	-0.0112746
	0.26	2.04493	1.38894	0.930431	0.591649	0.361459	0.215368	0.0703236	-0.00304401	1.41526	0.835778	0.508822	0.331177	0.223985	0.177375	0.0594399	-0.0081074
	0.263333	2.05748	1.39157	0.933232	0.589395	0.362685	0.217233	0.0720263	0.00144172	1.42462	0.842738	0.507	0.33749	0.229516	0.180513	0.0611968	-0.00835244
	0.266667	2.06424	1.39644	0.938361	0.597122	0.363324	0.214913	0.0735411	-0.00064677	1.43064	0.843316	0.50978	0.33796	0.225812	0.17673	0.0579681	-0.00829826
	0.27	2.06945	1.40218	0.93808	0.595952	0.359694	0.21633	0.0731364	0.00059968	1.4372	0.84705	0.514523	0.339015	0.226689	0.178176	0.0584522	-0.0069137
	0.273333	2.0755	1.39984	0.94315	0.596501	0.363458	0.218792	0.0745616	-0.00031513	1.44463	0.854382	0.514488	0.334862	0.229267	0.17875	0.0589222	-0.00651089
	0.276667	2.08227	1.4076	0.943568	0.596882	0.365284	0.219536	0.075535	0.00058198	1.45026	0.851973	0.518682	0.339527	0.225303	0.175314	0.055969	-0.00801448
	0.28	2.09168	1.41411	0.946951	0.599586	0.369254	0.219078	0.0755581	-0.00096715	1.45928	0.86021	0.517389	0.340721	0.233455	0.17657	0.0572815	-0.00580953
	0.283333	2.09071	1.41922	0.950871	0.598746	0.368677	0.219999	0.0754482	-0.00259227	1.46252	0.859638	0.519495	0.339177	0.228145	0.181224	0.0600201	-0.0126485
	0.286667	2.10444	1.42174	0.951267	0.603605	0.373488	0.222661	0.0721776	-0.00304103	1.47298	0.863788	0.522367	0.341493	0.230594	0.182026	0.0597601	-0.0119605
	0.29	2.1092	1.42619	0.952535	0.606331	0.368733	0.224968	0.0763787	-0.00030762	1.47865	0.868362	0.522903	0.34331	0.232597	0.18245	0.0579491	-0.0102411
	0.293333	2.11163	1.42727	0.953157	0.608129	0.37053	0.227264	0.0743464	0.00203621	1.48465	0.871011	0.522962	0.343084	0.234464	0.182761	0.0583479	-0.0127116
	0.296667	2.12227	1.43274	0.959542	0.608824	0.376084	0.223246	0.0783211	0.00105512	1.49609	0.874609	0.523283	0.342481	0.231109	0.184579	0.0588579	-0.00807593
	0.3	2.12799	1.432	0.958408	0.617884	0.374914	0.226654	0.0798648	0.00043672	1.49322	0.875875	0.524333	0.345041	0.231808	0.183108	0.0554436	-0.0112472
	0.303333	2.13384	1.4404	0.96277	0.612708	0.374392	0.227531	0.0764757	-0.0018236	1.50298	0.88217	0.525906	0.350991	0.235607	0.185686	0.0613141	-0.0126731
	0.306667	2.1392	1.44205	0.963135	0.611831	0.378033	0.230303	0.0763103	-0.00198418	1.51446	0.887302	0.527945	0.349044	0.235034	0.184223	0.0620655	-0.0114916
	0.31	2.1451	1.44456	0.96685	0.614933	0.37789	0.226625	0.0775531	0.00356692	1.51243	0.889808	0.534022	0.347929	0.235469	0.18463	0.0600109	-0.0106847
	0.313333	2.14893	1.45065	0.966675	0.618022	0.381159	0.234287	0.0759949	-6.503e-05	1.52051	0.892633	0.531691	0.352148	0.235528	0.190042	0.059859	-0.0116104
	0.316667	2.15627	1.45125	0.975043	0.619001	0.378866	0.235844	0.07707	-0.001387	1.52978	0.896179	0.534566	0.348187	0.235061	0.189565	0.0598877	-0.00797472
	0.32	2.16128	1.45699	0.976472	0.619838	0.381443	0.234663	0.0771611	-0.00192112	1.53734	0.898877	0.53444	0.34989	0.235964	0.188949	0.0572852	-0.00928889
	0.323333	2.16947	1.46516	0.978045	0.619102	0.383458	0.235557	0.0818972	-0.0028863	1.54526	0.90266	0.539446	0.35228	0.237491	0.189881	0.0598308	-0.0111399
	0.326667	2.1765	1.46659	0.980115	0.624764	0.383944	0.236857	0.076376	-0.00120395	1.5489	0.905343	0.540643	0.351651	0.238909	0.189017	0.062834	-0.00986014
	0.33	2.18165	1.46938	0.981401	0.624252	0.385582	0.234483	0.0817051	-0.00227636	1.55365	0.904623	0.542636	0.347908	0.239978	0.189351	0.0616705	-0.00968937
	0.333333	2.18603	1.47256	0.985402	0.628111	0.386612	0.236254	0.0819842	-0.00565624	1.56185	0.912262	0.544828	0.353569	0.238877	0.189223	0.0596409	-0.010109
	0.336667	2.19427	1.48022	0.983425	0.62874	0.384148	0.236909	0.0822109	0.00286794	1.56652	0.914424	0.54095	0.355148	0.237776	0.191623	0.0635956	-0.00896321
	0.34	2.19737	1.48449	0.985239	0.62983	0.3861	0.239261	0.0828394	0.0006538	1.57258	0.918671	0.542559	0.354837	0.237265	0.189447	0.0609277	-0.00821928
	0.343333	2.20676	1.48322	0.988983	0.631549	0.387806	0.239811	0.0799851	-0.00094664	1.57766	0.922342	0.544466	0.355348	0.239237	0.190978	0.0613831	-0.0119373
	0.346667	2.20832	1.48527	0.992115	0.634056	0.387467	0.236847	0.0792826	-0.00309348	1.5916	0.930779	0.546171	0.356215	0.241393	0.192829	0.0597954	-0.0108409
	0.35	2.2154	1.48674	0.994382	0.637324	0.389656	0.242289	0.0792586	-0.002204	1.59475	0.928447	0.549025	0.357254	0.242049	0.193525	0.059569	-0.0125422
	0.353333	2.21809	1.49348	0.991681	0.633356	0.391497	0.241012	0.0834827	0.0011161	1.60156	0.934659	0.546774	0.361115	0.242082	0.193177	0.0608052	-0.0078821
	0.356667	2.22485	1.4914	0.99761	0.637304	0.3942	0.247095	0.0811433	-0.00073814	1.60232	0.931081	0.551367	0.358733	0.24182	0.19467	0.0612621	-0.00892375
	0.36	2.23278	1.49855	1.00084	0.639739	0.395282	0.23963	0.0822866	-0.00174093	1.61297	0.940334	0.55185	0.361441	0.241829	0.195215	0.062455	-0.0142626
	0.363333	2.23495	1.50573	1.00477	0.642252	0.391717	0.243714	0.0827579	-0.00550449	1.62038	0.938242	0.553344	0.359817	0.245255	0.20011	0.0630592	-0.0108085
	0.366667	2.24262	1.50823	1.00307	0.636946	0.396643	0.248324	0.0874184	-0.004067	1.62112	0.944446	0.559581	0.36419	0.247306	0.196776	0.0600335	-0.0117432
	0.37	2.24544	1.51074	1.00798	0.639033	0.390259	0.24824	0.0815205	-0.00411552	1.62991	0.946745	0.556457	0.357175	0.240491	0.199238	0.0612057	-0.0121415
	0.373333	2.24952	1.51103	1.00693	0.643084	0.39426	0.241831	0.0859842	-0.00296134	1.63282	0.950828	0.557615	0.360698	0.240385	0.198427	0.0630451	-0.00997708
	0.376667	2.26121	1.51697	1.01064	0.642344	0.398216	0.24374	0.082443	-0.00050831	1.64513	0.9546	0.560661	0.363733	0.242354	0.194908	0.0633413	-0.01395
	0.38	2.25918	1.51896	1.01348	0.647285	0.397262	0.247385	0.0846634	-0.00385702	1.64689	0.959941	0.56034	0.362669	0.245099	0.195792	0.0640145	-0.0113944
	0.383333	2.26939	1.52841	1.01508	0.650546	0.398993	0.243615	0.0826512	-0.00423038	1.65264	0.96228	0.559802	0.363668	0.245313	0.193454	0.0612491	-0.0110357
	0.386667	2.27833	1.52642	1.01531	0.648094	0.403232	0.249272	0.0801158	-0.00715238	1.65648	0.960873	0.559736	0.36072	0.250303	0.200125	0.0607744	-0.00822256
	0.39	2.28223	1.52683	1.01762	0.650589	0.398165	0.243685	0.0913491	-0.00736374	1.66164	0.965778	0.565962	0.369267	0.249171	0.19969	0.0655692	-0.0130771
	0.393333	2.28305	1.53484	1.0197	0.649002	0.399576	0.247778	0.0861954	0.00015151	1.66908	0.968605	0.561727	0.363473	0.245169	0.19923	0.0643983	-0.0130296
	0.396667	2.293	1.5351	1.02531	0.654026	0.404794	0.245772	0.0863282	-0.00075126	1.67217	0.970565	0.56247	0.367785	0.248367	0.19948	0.0617884	-0.0129666
	0.4	2.297	1.54334	1.02406	0.65144	0.402344	0.257743	0.0833126	-0.0011071	1.67884	0.976341	0.56555	0.366685	0.249207	0.203094	0.0611797	-0.0113954
	0.403333	2.29864	1.53702	1.02539	0.652757	0.402904	0.24749	0.0902068	-0.00078976	1.68791	0.978299	0.565539	0.367178	0.249485	0.203891	0.0637969	-0.0126614
	0.406667	2.30295	1.54424	1.02684	0.652978	0.404098	0.251712	0.0835247	0.00045019	1.69188	0.976569	0.570009	0.370642	0.24341	0.199795	0.0637214	-0.00572888
	0.41	2.31126	1.55295	1.03395	0.656348	0.405176	0.2533	0.0892688	-0.00011891	1.69826	0.982579	0.575825	0.365475	0.250027	0.204905	0.0663776	-0.0105446
	0.413333	2.31741	1.55421	1.03402	0.655219	0.406669	0.257678	0.0888056	-0.00188422	1.6992	0.983641	0.571415	0.368979	0.246212	0.20194	0.0650484	-0.012307
	0.416667	2.32465	1.55799	1.03742	0.658084	0.404449	0.253748	0.0855714	-0.00181514	1.70544	0.98794	0.57382	0.370068	0.250929	0.201693	0.0667847	-0.0111295
	0.42	2.32735	1.56141	1.0343	0.656733	0.404562	0.253946	0.0848243	-0.00493407	1.7155	0.997182	0.575461	0.369583	0.250051	0.20142	0.0643251	-0.0125457
	0.423333	2.33641	1.56178	1.03642	0.661543	0.40574	0.256326	0.0825158	-0.00141639	1.71961	0.996044	0.57644	0.370182	0.251822	0.199493	0.0599464	-0.0131608
	0.426667	2.33728	1.56872	1.04155	0.660649	0.407322	0.255057	0.0871279	-0.00173473	1.72102	1.00257	0.576549	0.372332	0.248087	0.205472	0.0666517	-0.0119104
	0.43	2.34305	1.56745	1.03511	0.661131	0.410245	0.255458	0.0926466	-0.00285786	1.73034	0.997801	0.579337	0.371951	0.253546	0.203897	0.0654203	-0.0158915
	0.433333	2.34912	1.57334	1.04629	0.66651	0.410828	0.258288	0.0897571	-0.00249583	1.73405	1.00666	0.578846	0.3738	0.252507	0.20563	0.0645994	-0.013706
	0.436667	2.35162	1.57369	1.04422	0.665656	0.411692	0.251063	0.0871114	-0.00160813	1.73617	1.00723	0.581901	0.371749	0.249664	0.202589	0.0648326	-0.0116169
	0.44	2.35638	1.58332	1.04902	0.668294	0.410029	0.252893	0.0919972	-0.00391889	1.74634	1.01087	0.581794	0.376184	0.253273	0.201867	0.0663183	-0.0164669
	0.443333	2.36601	1.58203	1.04784	0.669774	0.412289	0.258873	0.0913651	-0.00285894	1.75077	1.01189	0.582728	0.373652	0.252518	0.20582	0.0651141	-0.0136402
	0.446667	2.36781	1.58887	1.04694	0.669424	0.413907	0.256637	0.0859359	-0.00366324	1.75609	1.01628	0.586062	0.372296	0.254366	0.207562	0.064152	-0.0110239
	0.45	2.37578	1.58586	1.05104	0.671038	0.411871	0.261199	0.0903479	-0.00323474	1.76767	1.01386	0.581779	0.381565	0.247838	0.203608	0.0622496	-0.014062
	0.453333	2.38062	1.59602	1.05252	0.668766	0.416242	0.263542	0.0903297	-0.00759006	1.76803	1.01893	0.587409	0.380071	0.2527	0.20841	0.0637376	-0.00888149
	0.456667	2.38435	1.59174	1.05625	0.673035	0.41216	0.261291	0.0862099	-0.00857222	1.77103	1.02412	0.587444	0.374174	0.255217	0.207534	0.0679619	-0.0152997
	0.46	2.38626	1.5986	1.05737	0.674365	0.413953	0.262722	0.0875018	-0.00218916	1.77722	1.02739	0.591103	0.377664	0.251405	0.204027	0.0616159	-0.00902937
	0.463333	2.39365	1.60562	1.0564	0.673087	0.419709	0.262754	0.0892869	-0.00431621	1.7803	1.0317	0.590135	0.378058	0.255167	0.207628	0.0697055	-0.00998322
	0.466667	2.3987	1.60525	1.05635	0.67345	0.417724	0.261906	0.0879816	-0.00665504	1.7888	1.03047	0.589319	0.377733	0.252131	0.206993	0.0643227	-0.0147435
	0.47	2.40426	1.60825	1.06305	0.681103	0.417077	0.263721	0.0885735	-0.00672758	1.79126	1.03495	0.592748	0.379568	0.254302	0.207124	0.067961	-0.0132414
	0.473333	2.40796	1.61068	1.06958	0.678216	0.413282	0.265251	0.0906058	-0.00072116	1.79944	1.03638	0.593194	0.378894	0.252691	0.209986	0.0656192	-0.0136749
	0.476667	2.41025	1.61038	1.06577	0.678036	0.416839	0.265071	0.092153	-0.00208539	1.80563	1.03561	0.593191	0.378835	0.257407	0.209204	0.0689771	-0.0137299
	0.48	2.41713	1.6145	1.06965	0.677991	0.416765	0.263041	0.0944153	-0.00710481	1.80379	1.04567	0.596063	0.38045	0.253959	0.206853	0.0685111	-0.0143884
	0.483333	2.42269	1.61621	1.07239	0.68386	0.415913	0.265643	0.0920293	-0.00338542	1.81307	1.04899	0.598433	0.381585	0.253619	0.208947	0.0613866	-0.0127835
	0.486667	2.42602	1.61939	1.07166	0.683403	0.416823	0.260364	0.0914484	-0.0061782	1.81863	1.0461	0.597771	0.381119	0.261601	0.210844	0.0659122	-0.0119911
	0.49	2.42829	1.62293	1.07415	0.68313	0.417573	0.265602	0.0919741	-0.00546205	1.8221	1.04882	0.599246	0.378897	0.258439	0.207366	0.0661783	-0.012835
	0.493333	2.43631	1.62724	1.07883	0.681545	0.416614	0.269304	0.090148	-2.158e-05	1.82583	1.05803	0.597049	0.380891	0.26047	0.211798	0.0688512	-0.0158129
	0.496667	2.43809	1.62666	1.07731	0.685854	0.422	0.264236	0.0926022	-0.00372314	1.83119	1.05428	0.603169	0.381816	0.257979	0.210765	0.0639412	-0.015368
	0.5	2.4427	1.63704	1.07978	0.687807	0.422732	0.2671	0.0930298	-0.00204635	1.83633	1.0624	0.5943	0.382896	0.256957	0.212322	0.0644239	-0.0124919
	0.503333	2.45145	1.63271	1.08253	0.688647	0.42533	0.26903	0.093486	-0.00061798	1.84568	1.06114	0.600368	0.382087	0.260143	0.208915	0.073516	-0.0117578
	0.506667	2.45218	1.63422	1.08155	0.687607	0.423262	0.268653	0.0932911	-0.00625604	1.85031	1.06351	0.602129	0.380342	0.260314	0.208812	0.0709811	-0.0123935
	0.51	2.46049	1.64607	1.08085	0.687395	0.423486	0.26939	0.0956216	-0.00341064	1.85482	1.06545	0.600997	0.389504	0.256818	0.209647	0.0619221	-0.0134371
	0.513333	2.46333	1.64613	1.08857	0.690649	0.423022	0.265721	0.0935983	-0.00643319	1.86033	1.0674	0.60222	0.384285	0.258445	0.211731	0.0664912	-0.0129153
	0.516667	2.4729	1.64508	1.08752	0.69395	0.426453	0.271409	0.0921987	-0.00838089	1.86246	1.072	0.605239	0.386237	0.26022	0.211313	0.0629274	-0.0162582
	0.52	2.4743	1.65426	1.08691	0.694525	0.425924	0.270139	0.0976322	-0.00269032	1.86596	1.07248	0.605679	0.384726	0.259643	0.213613	0.0675777	-0.0131248
	0.523333	2.4783	1.65918	1.09118	0.68896	0.424048	0.275051	0.0923784	-0.00764883	1.8762	1.07526	0.609114	0.388141	0.260517	0.21581	0.0664778	-0.0150987
	0.526667	2.4828	1.65706	1.09197	0.690038	0.422314	0.274273	0.0978648	-0.00455916	1.87787	1.07642	0.608612	0.383162	0.261088	0.213925	0.0678136	-0.0118192
	0.53	2.48692	1.65836	1.09182	0.692416	0.426612	0.271829	0.097405	-0.00582433	1.88204	1.08391	0.609628	0.385031	0.264151	0.212729	0.0645562	-0.0103913
	0.533333	2.48875	1.66771	1.09662	0.699929	0.431672	0.274068	0.0939322	-0.00176114	1.89018	1.09008	0.610211	0.390691	0.263072	0.209892	0.0695147	-0.0122549
	0.536667	2.5	1.66795	1.09415	0.692729	0.432578	0.27535	0.101746	-0.00311518	1.89157	1.08727	0.610919	0.386369	0.260866	0.21452	0.0681	-0.016086
	0.54	2.49779	1.67244	1.10127	0.698862	0.432968	0.271425	0.0963836	-0.00322843	1.89867	1.09014	0.615193	0.386543	0.258133	0.213626	0.0655372	-0.0129796
	0.543333	2.50683	1.66938	1.09974	0.69767	0.430047	0.273417	0.0982447	-0.0023222	1.90311	1.09822	0.619192	0.385609	0.263577	0.213157	0.0724054	-0.0148737
	0.546667	2.51158	1.67311	1.10261	0.702608	0.429887	0.277362	0.100889	-0.00649029	1.90549	1.10239	0.616857	0.389898	0.265099	0.213446	0.0670928	-0.0162505
	0.55	2.51284	1.67589	1.10192	0.701204	0.429329	0.274732	0.0963506	-0.00140202	1.91135	1.10101	0.617607	0.391041	0.25957	0.214272	0.0658748	-0.0138718
	0.553333	2.51867	1.68286	1.10616	0.701889	0.43248	0.273396	0.099753	-0.00281155	1.91839	1.10091	0.614669	0.38797	0.262725	0.213078	0.0688959	-0.012353
	0.556667	2.52613	1.68	1.10639	0.701402	0.431595	0.274771	0.0993131	-0.00418466	1.91949	1.10919	0.617902	0.391334	0.263499	0.214143	0.0706627	-0.0135283
	0.56	2.52791	1.68683	1.10755	0.701291	0.433489	0.271749	0.0965176	-0.00276899	1.92789	1.10793	0.618263	0.388811	0.261089	0.217883	0.0653416	-0.0148092
	0.563333	2.53381	1.68945	1.10749	0.708117	0.433867	0.267995	0.094207	-0.00594306	1.93142	1.10863	0.6206	0.392499	0.259674	0.217056	0.0690921	-0.0153041
	0.566667	2.53874	1.68816	1.1135	0.70168	0.435581	0.279649	0.096245	-0.00521433	1.93759	1.1146	0.624302	0.394461	0.263289	0.209731	0.0692677	-0.0134791
	0.57	2.54187	1.69534	1.11202	0.706305	0.433255	0.278312	0.0949832	-0.00615394	1.93584	1.11768	0.627225	0.388935	0.263755	0.212881	0.06742	-0.0169359
	0.573333	2.54911	1.69621	1.11534	0.707419	0.43202	0.272862	0.099098	-0.00510579	1.94011	1.11458	0.621741	0.392106	0.264971	0.216929	0.0666047	-0.0186038
	0.576667	2.54875	1.69708	1.1162	0.707188	0.435317	0.278889	0.101859	-0.00993067	1.94654	1.11786	0.621965	0.393836	0.263792	0.221064	0.0701485	-0.0153031
	0.58	2.55527	1.70083	1.11553	0.709568	0.437343	0.278548	0.102348	-0.0070017	1.95079	1.12166	0.626906	0.392134	0.266922	0.215687	0.0669083	-0.0138998
	0.583333	2.56149	1.70748	1.11741	0.714263	0.43488	0.278328	0.0998474	-0.00275457	1.95752	1.12453	0.62806	0.391269	0.266987	0.21676	0.0697051	-0.0168597
	0.586667	2.56686	1.71006	1.11573	0.710863	0.436114	0.277548	0.0993522	-0.0015583	1.96263	1.12552	0.625969	0.388701	0.267709	0.214556	0.072249	-0.015418
	0.59	2.56564	1.70733	1.12245	0.710213	0.439327	0.272475	0.104154	-0.00932562	1.96647	1.13114	0.624441	0.391485	0.265244	0.214418	0.0647793	-0.0155728
	0.593333	2.57265	1.71302	1.12679	0.712838	0.436897	0.277797	0.100192	-0.00761706	1.96917	1.12868	0.627666	0.394927	0.266288	0.217306	0.0667679	-0.0141364
	0.596667	2.57444	1.71487	1.1226	0.714536	0.436369	0.282492	0.0997613	-0.00893205	1.97624	1.13701	0.625226	0.397754	0.265763	0.216667	0.0658865	-0.0166583
	0.6	2.58345	1.7151	1.12699	0.712761	0.437725	0.279849	0.0985259	-0.0048098	1.97732	1.13672	0.629662	0.397269	0.264703	0.216878	0.0676491	-0.0175301
	0.603333	2.58651	1.72249	1.12276	0.712867	0.441821	0.280103	0.10196	-0.00589919	1.98923	1.14066	0.629517	0.393579	0.266357	0.216547	0.0696003	-0.0116679
	0.606667	2.59031	1.72223	1.13047	0.714737	0.441399	0.283208	0.101096	-0.00647384	1.99009	1.14165	0.629931	0.395398	0.270758	0.216297	0.0700298	-0.0138532
	0.61	2.59771	1.72892	1.13047	0.712713	0.440762	0.282392	0.101933	-0.00741518	1.99302	1.14221	0.637429	0.399073	0.264489	0.217213	0.0719964	-0.0182722
	0.613333	2.5967	1.72991	1.13056	0.720058	0.440374	0.278302	0.101012	-0.00428063	1.99494	1.14885	0.635516	0.394255	0.264254	0.215537	0.0712216	-0.012415
	0.616667	2.60836	1.73475	1.12961	0.71677	0.440615	0.282228	0.100343	-0.00583446	2.00055	1.1449	0.635118	0.401227	0.271569	0.217208	0.0705845	-0.0144724
	0.62	2.60572	1.73637	1.13283	0.721484	0.43938	0.285056	0.104271	-0.0073508	2.0085	1.14818	0.634912	0.397277	0.26974	0.219983	0.066633	-0.0207943
	0.623333	2.61297	1.73941	1.13732	0.720163	0.444117	0.283428	0.101448	-0.00805485	2.01061	1.15653	0.63859	0.401812	0.269372	0.219706	0.0671446	-0.0111612
	0.626667	2.61422	1.73809	1.13832	0.722502	0.44229	0.276814	0.100584	-0.00930023	2.01779	1.15831	0.634641	0.396916	0.269277	0.219856	0.0696204	-0.0168426
	0.63	2.62557	1.74434	1.13805	0.720958	0.443489	0.280833	0.101372	-0.00406665	2.02004	1.15868	0.641166	0.397931	0.263442	0.216776	0.0735816	-0.0146878
	0.633333	2.62228	1.74755	1.13853	0.72173	0.443896	0.282985	0.103497	-0.00769013	2.02114	1.16418	0.636494	0.400254	0.265884	0.221415	0.0694692	-0.0150097
	0.636667	2.62953	1.74883	1.14095	0.721246	0.441834	0.285096	0.0999163	-0.011557	2.02696	1.16651	0.636571	0.398287	0.270182	0.219151	0.0673875	-0.0162481
	0.64	2.63231	1.75072	1.14518	0.723243	0.439208	0.286981	0.103195	-0.00799698	2.03577	1.17031	0.64036	0.398358	0.272468	0.220725	0.066714	-0.0167715
	0.643333	2.63701	1.75306	1.14737	0.720946	0.44778	0.28081	0.107507	-0.00762957	2.03579	1.16809	0.642135	0.398494	0.269762	0.219345	0.0678377	-0.0157861
	0.646667	2.63741	1.75663	1.14423	0.727566	0.443502	0.283504	0.101768	-0.00693804	2.04057	1.17366	0.643757	0.399881	0.272214	0.219202	0.0733046	-0.0174446
	0.65	2.6481	1.76143	1.1508	0.724347	0.44356	0.282767	0.100118	-0.0012992	2.04405	1.17591	0.648095	0.404117	0.268626	0.217682	0.0715036	-0.0156975
	0.653333	2.64654	1.76116	1.14792	0.727328	0.442395	0.285606	0.107044	-0.00811309	2.04909	1.17449	0.644577	0.405646	0.26791	0.220612	0.070587	-0.0156697
	0.656667	2.65047	1.76342	1.14936	0.729058	0.44846	0.287794	0.103091	-0.00594032	2.05429	1.17921	0.645051	0.400653	0.271427	0.221133	0.0698089	-0.015122
	0.66	2.65546	1.76679	1.15223	0.729519	0.448632	0.284806	0.100099	-0.0115045	2.05872	1.18327	0.648334	0.401248	0.268192	0.220178	0.07482	-0.00971321
	0.663333	2.65872	1.76879	1.15481	0.72991	0.449791	0.285364	0.103284	-0.00889623	2.06238	1.18489	0.646618	0.405741	0.271137	0.22234	0.0762675	-0.0178214
	0.666667	2.66105	1.77214	1.16124	0.73063	0.451216	0.285971	0.102495	-0.00618941	2.06652	1.18758	0.64791	0.40397	0.269942	0.221149	0.0694552	-0.0182265
	0.67	2.66939	1.77834	1.15882	0.729253	0.44466	0.285261	0.106377	-0.00970495	2.07027	1.18784	0.648434	0.404093	0.272703	0.223543	0.0734908	-0.0161484
	0.673333	2.66974	1.78243	1.16063	0.73215	0.448848	0.286017	0.10747	-0.00771898	2.07734	1.1915	0.650951	0.402139	0.270388	0.223738	0.0711576	-0.0157412
	0.676667	2.67566	1.78407	1.1574	0.73387	0.447829	0.286806	0.10548	-0.00605309	2.08065	1.19134	0.65353	0.402807	0.272633	0.217185	0.0712169	-0.0179159
	0.68	2.68371	1.78142	1.16065	0.736239	0.449225	0.286643	0.103595	-0.00744236	2.08357	1.19634	0.651614	0.403277	0.272887	0.221875	0.0687833	-0.0193641
	0.683333	2.68084	1.78749	1.16612	0.736492	0.453233	0.288349	0.108913	-0.0037654	2.08702	1.19824	0.654966	0.400555	0.272795	0.219484	0.0704696	-0.0173334
	0.686667	2.68744	1.78754	1.16535	0.734542	0.447725	0.286426	0.107771	-0.0143454	2.09048	1.20166	0.653574	0.407612	0.273008	0.222019	0.0688457	-0.0133072
	0.69	2.69686	1.79	1.16699	0.73186	0.452247	0.28792	0.101607	-0.00701743	2.09698	1.20492	0.654972	0.404617	0.272084	0.218534	0.0731895	-0.0186825
	0.693333	2.69345	1.7925	1.17048	0.738005	0.453304	0.28851	0.10527	-0.00750029	2.09786	1.20661	0.656475	0.406473	0.270486	0.221027	0.0709668	-0.0181796
	0.696667	2.70184	1.79859	1.16858	0.737245	0.452104	0.289114	0.108184	-0.0102646	2.10165	1.20234	0.655594	0.402857	0.274421	0.221679	0.0719945	-0.0218318
	0.7	2.70292	1.80033	1.16873	0.741683	0.454249	0.293104	0.104331	-0.00690091	2.10534	1.2082	0.657369	0.406489	0.272811	0.221027	0.0718239	-0.0160405
	0.703333	2.70962	1.79821	1.17308	0.741995	0.452686	0.285925	0.108308	-0.0022338	2.10865	1.20887	0.658922	0.407166	0.274039	0.224999	0.0750083	-0.0172012
	0.706667	2.70954	1.80243	1.17415	0.744483	0.45506	0.286295	0.10492	-0.00623411	2.11608	1.21295	0.659079	0.405313	0.272385	0.220817	0.0692855	-0.0184159
	0.71	2.71429	1.80443	1.17299	0.741315	0.450645	0.290176	0.105382	-0.0118562	2.11892	1.2151	0.658698	0.40488	0.270009	0.220281	0.0737638	-0.0184629
	0.713333	2.71827	1.8132	1.17688	0.733804	0.454452	0.288858	0.106358	-0.00601679	2.12678	1.21712	0.65936	0.408838	0.275208	0.221819	0.0700862	-0.0135868
	0.716667	2.72726	1.80905	1.177	0.74152	0.454619	0.291468	0.10363	-0.00950521	2.12742	1.21839	0.662375	0.406525	0.275029	0.224634	0.0733297	-0.0161308
	0.72	2.72491	1.82013	1.18106	0.745511	0.456102	0.290207	0.105942	-0.00638175	2.12737	1.2235	0.65947	0.403415	0.270286	0.222814	0.0745915	-0.020024
	0.723333	2.7332	1.81567	1.18175	0.739582	0.455888	0.293427	0.110032	-0.00633568	2.13838	1.22406	0.660012	0.407948	0.27185	0.223391	0.0733654	-0.0205949
	0.726667	2.73321	1.82103	1.18286	0.742452	0.454803	0.290277	0.106914	-0.00900751	2.13979	1.22682	0.658706	0.409775	0.273254	0.225921	0.0717592	-0.019673
	0.73	2.73632	1.82187	1.18543	0.742654	0.455616	0.289325	0.110481	-0.00656104	2.14653	1.22701	0.659968	0.407672	0.276324	0.226794	0.0709439	-0.0182459
	0.733333	2.74304	1.82494	1.18208	0.746672	0.451919	0.289953	0.108237	-0.00727725	2.1492	1.23196	0.663266	0.410548	0.275477	0.226583	0.0701932	-0.0188566
	0.736667	2.74503	1.83045	1.18887	0.747264	0.45559	0.29121	0.106104	-0.00845468	2.15412	1.23295	0.662817	0.409693	0.271874	0.226576	0.0746497	-0.0172161
	0.74	2.74871	1.82855	1.18747	0.74884	0.45631	0.295703	0.106179	-0.00386781	2.15224	1.24014	0.666936	0.41391	0.277101	0.222403	0.0731176	-0.0153248
	0.743333	2.75009	1.82642	1.18907	0.747001	0.459923	0.290573	0.109051	-0.00492066	2.16058	1.24006	0.664925	0.41215	0.276268	0.224877	0.0712958	-0.0136439
	0.746667	2.76154	1.83315	1.19331	0.747685	0.456829	0.292816	0.107353	-0.0069201	2.16468	1.24056	0.669921	0.415137	0.273938	0.22345	0.0722729	-0.022896
	0.75	2.76154	1.83486	1.19029	0.751125	0.455377	0.29247	0.107851	-0.0101338	2.16498	1.24438	0.672072	0.411227	0.278016	0.220513	0.071602	-0.0178834
	0.753333	2.76761	1.83836	1.19348	0.749322	0.46277	0.292121	0.112043	-0.00926393	2.16737	1.24201	0.668894	0.408473	0.27779	0.223613	0.0702178	-0.0151415
	0.756667	2.76511	1.83991	1.19456	0.754902	0.455982	0.291974	0.107653	-0.00890303	2.17662	1.24506	0.670939	0.411309	0.278004	0.226152	0.0703185	-0.0194171
	0.76	2.76885	1.84056	1.1951	0.753012	0.455464	0.295615	0.112423	-0.0107804	2.1785	1.2502	0.669242	0.41474	0.279236	0.225843	0.0729197	-0.0221907
	0.763333	2.77569	1.84512	1.19748	0.756761	0.459511	0.294269	0.113104	-0.0154762	2.17891	1.25269	0.67286	0.414796	0.274047	0.228076	0.0717237	-0.0188194
	0.766667	2.78235	1.84932	1.19747	0.753234	0.461415	0.293441	0.107931	-0.00963289	2.1884	1.25448	0.675454	0.412832	0.279357	0.226011	0.0734298	-0.0198402
	0.77	2.78397	1.84982	1.1944	0.754488	0.459836	0.294435	0.113006	-0.00961208	2.18441	1.25635	0.673476	0.414208	0.274064	0.224964	0.0720942	-0.0202855
	0.773333	2.78791	1.84965	1.19925	0.754858	0.46412	0.297852	0.108948	-0.0117505	2.19222	1.25872	0.675726	0.414204	0.275819	0.222025	0.0781971	-0.0154858
	0.776667	2.79571	1.8562	1.20419	0.759275	0.464617	0.292131	0.114336	-0.0109561	2.19616	1.26376	0.67582	0.417988	0.27743	0.226907	0.0769328	-0.0209078
	0.78	2.79514	1.85657	1.20098	0.754614	0.45849	0.292147	0.109757	-0.0103914	2.20114	1.26704	0.676775	0.413818	0.273121	0.229801	0.0753652	-0.0169828
	0.783333	2.79627	1.86346	1.20611	0.754029	0.464099	0.293298	0.112649	-0.00448591	2.20645	1.26592	0.678891	0.411945	0.272922	0.225104	0.0701808	-0.0174941
	0.786667	2.80224	1.86681	1.20665	0.753279	0.459734	0.296612	0.108994	-0.00835776	2.20996	1.26762	0.683762	0.414671	0.276701	0.227057	0.0764608	-0.0159438
	0.79	2.80592	1.86278	1.2095	0.757494	0.458945	0.300544	0.113218	-0.00944257	2.2088	1.26623	0.675956	0.41642	0.278533	0.226898	0.0744898	-0.0229425
	0.793333	2.8097	1.86822	1.20758	0.765934	0.45838	0.295552	0.109785	-0.00916749	2.21642	1.27336	0.680153	0.414494	0.276568	0.226072	0.0730393	-0.018735
	0.796667	2.81811	1.87747	1.21144	0.760862	0.463088	0.299584	0.112031	-0.006356	2.21602	1.27279	0.681022	0.414848	0.279447	0.223236	0.0742357	-0.0189251
	0.8	2.8115	1.87232	1.21328	0.758529	0.460333	0.297847	0.110644	-0.00984579	2.22133	1.28088	0.680669	0.414582	0.278634	0.22664	0.0744551	-0.017354
	0.803333	2.82399	1.87529	1.21145	0.759875	0.459048	0.297971	0.114435	-0.00786555	2.22854	1.28341	0.681452	0.418365	0.277352	0.2288	0.0734713	-0.0205616
	0.806667	2.82307	1.8768	1.21575	0.76122	0.461471	0.2982	0.109305	-0.0060668	2.23052	1.2829	0.682978	0.418797	0.277156	0.227713	0.0790692	-0.0178135
	0.81	2.82715	1.87918	1.21303	0.762199	0.464909	0.298284	0.110919	-0.00728458	2.23342	1.28205	0.685714	0.416264	0.276817	0.227828	0.0722319	-0.0192777
	0.813333	2.83357	1.88619	1.21489	0.766638	0.459709	0.293146	0.113053	-0.0121757	2.23617	1.28559	0.683243	0.418783	0.276606	0.228209	0.0738389	-0.0173943
	0.816667	2.83271	1.88657	1.21683	0.76347	0.463846	0.298166	0.115507	-0.00892198	2.23842	1.29283	0.683558	0.415992	0.277878	0.22616	0.0746744	-0.0177785
	0.82	2.83624	1.88464	1.21903	0.766477	0.465157	0.296317	0.112962	-0.00570184	2.24345	1.28935	0.684326	0.416401	0.280177	0.226553	0.0769375	-0.0186621
	0.823333	2.83991	1.88759	1.21845	0.767487	0.46616	0.299637	0.112352	-0.0116876	2.24674	1.29135	0.687721	0.415678	0.279711	0.232064	0.0729637	-0.0204411
	0.826667	2.84733	1.89035	1.22243	0.766931	0.468633	0.297772	0.115744	-0.00842476	2.2481	1.29641	0.687448	0.41972	0.276295	0.226059	0.0736353	-0.0215911
	0.83	2.84422	1.89343	1.21989	0.770984	0.46697	0.303107	0.111933	-0.0136452	2.25581	1.3006	0.69056	0.416523	0.282353	0.229886	0.0710957	-0.0201643
	0.833333	2.85366	1.89346	1.22413	0.769683	0.464768	0.297495	0.112434	-0.00636953	2.25646	1.30158	0.690471	0.417759	0.280408	0.225956	0.075634	-0.0171375
	0.836667	2.85535	1.89913	1.22222	0.76884	0.466619	0.306182	0.116521	-0.00884497	2.25831	1.30047	0.695685	0.420735	0.276551	0.224611	0.0770813	-0.0240623
	0.84	2.85727	1.90167	1.23028	0.769186	0.466803	0.297817	0.117615	-0.00804746	2.26345	1.29918	0.691835	0.421777	0.281829	0.225172	0.0713336	-0.0170772
	0.843333	2.86094	1.90498	1.22852	0.770005	0.466598	0.300117	0.116022	-0.00988519	2.26826	1.30455	0.692741	0.420485	0.278751	0.229583	0.0727055	-0.0196338
	0.846667	2.87032	1.9069	1.23202	0.772126	0.465281	0.299045	0.117011	-0.00874907	2.2737	1.31011	0.689401	0.422629	0.278355	0.228589	0.0757546	-0.0206845
	0.85	2.86498	1.90672	1.23443	0.76787	0.468143	0.304784	0.113572	-0.0107675	2.27568	1.31141	0.692134	0.420811	0.276199	0.232057	0.0737631	-0.0192798
	0.853333	2.8717	1.91468	1.23213	0.773123	0.465369	0.297784	0.115761	-0.00997174	2.27683	1.31208	0.692731	0.420874	0.278321	0.229665	0.0721872	-0.0225848
	0.856667	2.87284	1.91209	1.23545	0.770201	0.468141	0.300313	0.115767	-0.0119757	2.28692	1.31469	0.693398	0.418543	0.282701	0.226773	0.0706456	-0.0219549
	0.86	2.88203	1.9141	1.23399	0.772158	0.46977	0.298918	0.112211	-0.00975859	2.28718	1.31413	0.692453	0.421591	0.277221	0.227994	0.0762299	-0.0209523
	0.863333	2.88527	1.91335	1.23592	0.76939	0.468895	0.2964	0.117842	-0.0116237	2.28817	1.31675	0.697404	0.421136	0.275596	0.22916	0.0730283	-0.0176514
	0.866667	2.88835	1.92397	1.23596	0.777035	0.468353	0.298258	0.116098	-0.00897169	2.29407	1.31935	0.694111	0.423339	0.280683	0.225252	0.0749135	-0.0220594
	0.87	2.88819	1.9263	1.23806	0.775689	0.473842	0.301117	0.111993	-0.0121647	2.29659	1.32311	0.69907	0.422902	0.283184	0.228424	0.0730837	-0.0185835
	0.873333	2.8921	1.92306	1.23968	0.772449	0.46944	0.300592	0.112592	-0.00844431	2.30008	1.31973	0.698827	0.414085	0.282617	0.227542	0.0767828	-0.0223142
	0.876667	2.90024	1.92938	1.24139	0.776271	0.471129	0.302696	0.10923	-0.011636	2.29895	1.32476	0.699009	0.422717	0.280169	0.230191	0.078362	-0.0188801
	0.88	2.90192	1.93149	1.24059	0.777313	0.467134	0.303927	0.117294	-0.0109902	2.30655	1.33124	0.697652	0.421345	0.284974	0.23005	0.0757819	-0.0220806
	0.883333	2.90613	1.9293	1.24399	0.779173	0.471241	0.306017	0.117394	-0.0136335	2.31142	1.32809	0.700229	0.422506	0.279311	0.232074	0.072918	-0.0201633
	0.886667	2.90505	1.932	1.2449	0.781231	0.470491	0.299893	0.116232	-0.0126255	2.31503	1.33631	0.703799	0.422498	0.279138	0.226017	0.0737259	-0.0212817
	0.89	2.90882	1.93742	1.2495	0.777868	0.47149	0.30493	0.118587	-0.0103545	2.31806	1.33487	0.705251	0.418127	0.283711	0.232474	0.0748583	-0.0209926
	0.893333	2.91058	1.94174	1.24672	0.780469	0.471458	0.308125	0.111354	-0.0136837	2.32581	1.33688	0.703425	0.422953	0.286712	0.229918	0.0743726	-0.019009
	0.896667	2.91534	1.94358	1.24514	0.782914	0.476502	0.303613	0.115018	-0.0118018	2.32515	1.34021	0.701917	0.423465	0.281599	0.231177	0.0746516	-0.0198706
	0.9	2.92017	1.94422	1.25034	0.781719	0.476944	0.303096	0.120012	-0.00957453	2.32613	1.33998	0.702296	0.425602	0.281268	0.230642	0.0796578	-0.0197704
	0.903333	2.91922	1.94491	1.24718	0.781471	0.476548	0.305919	0.1131	-0.0102552	2.33266	1.3411	0.708241	0.421497	0.281108	0.231459	0.0720668	-0.0208194
	0.906667	2.92824	1.94592	1.25194	0.782809	0.47308	0.305279	0.118709	-0.0136036	2.3339	1.34277	0.707417	0.42005	0.281628	0.230817	0.0763426	-0.0215666
	0.91	2.93653	1.94719	1.25002	0.786479	0.471852	0.304413	0.114554	-0.0103448	2.33767	1.3488	0.704488	0.427805	0.283487	0.233521	0.0768016	-0.0187999
	0.913333	2.93705	1.95326	1.25463	0.781441	0.473016	0.305509	0.119446	-0.00906247	2.34103	1.34685	0.706651	0.426745	0.281225	0.230499	0.0735253	-0.0222893
	0.916667	2.93612	1.95456	1.25931	0.791423	0.473504	0.30541	0.115464	-0.0105575	2.34445	1.34732	0.707801	0.422601	0.286446	0.229455	0.0726093	-0.0217904
	0.92	2.93748	1.95953	1.25877	0.785226	0.471644	0.304908	0.116896	-0.0095284	2.3447	1.35731	0.709067	0.426843	0.280815	0.23148	0.0803281	-0.0200447
	0.923333	2.94022	1.95211	1.26018	0.785574	0.477389	0.301657	0.119693	-0.0107961	2.35492	1.35701	0.711904	0.427391	0.279636	0.228183	0.0751908	-0.0191399
	0.926667	2.94295	1.96067	1.26275	0.783616	0.476719	0.305571	0.115732	-0.0102973	2.35255	1.35604	0.708822	0.421674	0.283692	0.234969	0.0730857	-0.0240896
	0.93	2.94967	1.96585	1.26304	0.786893	0.47488	0.303997	0.114713	-0.0142013	2.35931	1.36079	0.714115	0.426315	0.27886	0.233565	0.0768229	-0.0233119
	0.933333	2.95533	1.97171	1.26629	0.78862	0.476551	0.308128	0.115422	-0.0108932	2.3606	1.36062	0.71321	0.423797	0.282983	0.232874	0.0748527	-0.0175614
	0.936667	2.95521	1.96935	1.26417	0.790797	0.476069	0.303819	0.118625	-0.00683558	2.36483	1.36466	0.711758	0.428215	0.285149	0.233536	0.0744193	-0.0234872
	0.94	2.95762	1.97178	1.26195	0.786343	0.477846	0.304182	0.1171	-0.0104929	2.36652	1.36212	0.713858	0.427319	0.281607	0.229675	0.0731515	-0.0201217
	0.943333	2.95864	1.97718	1.26819	0.791479	0.474385	0.307915	0.118401	-0.0108941	2.36795	1.36405	0.714881	0.428886	0.284606	0.234259	0.0754747	-0.0238187
	0.946667	2.96544	1.97793	1.26713	0.791524	0.47469	0.303882	0.120788	-0.0124175	2.3744	1.36822	0.714612	0.427946	0.281098	0.232578	0.0749681	-0.0231301
	0.95	2.96821	1.9765	1.26807	0.792197	0.477944	0.30777	0.119748	-0.0135234	2.37335	1.3725	0.715731	0.425061	0.280226	0.233489	0.0744465	-0.0236583
	0.953333	2.97444	1.97746	1.26853	0.790778	0.47822	0.309176	0.120998	-0.0120308	2.38335	1.3772	0.719978	0.428183	0.284413	0.231124	0.0728955	-0.0252619
	0.956667	2.97396	1.98202	1.27602	0.79086	0.479464	0.307024	0.120664	-0.0123597	2.38141	1.3762	0.718746	0.42814	0.289014	0.229138	0.0754747	-0.0232613
	0.96	2.97844	1.98186	1.27087	0.790384	0.481845	0.306974	0.119325	-0.0119416	2.38565	1.37708	0.714856	0.425772	0.28446	0.236579	0.0768702	-0.0204765
	0.963333	2.98036	1.99039	1.27338	0.79105	0.478344	0.310384	0.122387	-0.0114039	2.39227	1.37876	0.718519	0.431082	0.281794	0.23417	0.0752493	-0.0217213
	0.966667	2.98952	1.98634	1.27272	0.793778	0.475713	0.305301	0.120134	-0.0121986	2.39314	1.38159	0.718134	0.43119	0.284869	0.234856	0.0758318	-0.0208836
	0.97	2.98709	1.99015	1.2752	0.792214	0.480018	0.30593	0.121944	-0.0134555	2.39418	1.38352	0.71805	0.428221	0.284595	0.239234	0.0749057	-0.0247606
	0.973333	2.9885	1.99502	1.28025	0.795038	0.479293	0.306361	0.117735	-0.0111409	2.4013	1.38416	0.721065	0.431543	0.283539	0.232453	0.0749191	-0.0224021
	0.976667	2.99408	1.99549	1.27677	0.794633	0.481505	0.309152	0.122532	-0.0130804	2.40061	1.38907	0.723521	0.428256	0.287593	0.231856	0.0777221	-0.0266452
	0.98	2.99752	2	1.27937	0.798998	0.476288	0.30867	0.117538	-0.0118371	2.40353	1.38942	0.72453	0.427214	0.283728	0.229815	0.0733294	-0.0252285
	0.983333	3.00284	1.99678	1.28149	0.800451	0.484564	0.30577	0.122932	-0.0141044	2.41007	1.39287	0.722388	0.429455	0.28731	0.232403	0.0753801	-0.0251564
	0.986667	3.00443	2.00287	1.28402	0.796251	0.480772	0.30776	0.117947	-0.0124479	2.41518	1.39271	0.720909	0.429995	0.288191	0.231356	0.077588	-0.0209216
	0.99	3.0044	2.00378	1.28167	0.799802	0.482003	0.3094	0.123008	-0.0120735	2.41205	1.39647	0.723859	0.432623	0.281934	0.233996	0.0753293	-0.023037
	0.993333	3.01239	2.00959	1.28273	0.797986	0.480816	0.308661	0.123577	-0.00950199	2.41604	1.3964	0.727268	0.434057	0.287499	0.234642	0.0753082	-0.0267668
	0.996667	3.01318	2.00748	1.28721	0.796034	0.482503	0.309804	0.122214	-0.0107568	2.41802	1.40269	0.731477	0.428911	0.283733	0.236393	0.0787873	-0.0206768
	1	3.01654	2.01162	1.2851	0.799324	0.481626	0.305264	0.123574	-0.0129732	2.42325	1.39853	0.725974	0.428782	0.285274	0.236677	0.0762293	-0.0216361
	1.00333	3.01959	2.01202	1.29387	0.79618	0.483673	0.309454	0.12122	-0.0124366	2.42899	1.40497	0.727653	0.431643	0.284293	0.235717	0.079228	-0.0223438
	1.00667	3.01857	2.01578	1.29036	0.803964	0.485418	0.307491	0.12342	-0.0118823	2.43192	1.40715	0.72962	0.432849	0.290745	0.23312	0.077126	-0.0216226
	1.01	3.02403	2.01135	1.29316	0.798881	0.48328	0.30453	0.123482	-0.0145007	2.43326	1.40695	0.728022	0.426832	0.285291	0.232082	0.07618	-0.0264657
	1.01333	3.02703	2.01571	1.29566	0.803964	0.484675	0.311341	0.12164	-0.0110664	2.43011	1.4105	0.731127	0.433408	0.285705	0.234035	0.0753876	-0.0242916
	1.01667	3.03102	2.0199	1.29272	0.801448	0.483179	0.310842	0.121601	-0.0156547	2.44078	1.41608	0.73406	0.435353	0.285306	0.233574	0.0769555	-0.0189889
	1.02	3.03154	2.02135	1.29193	0.802496	0.483046	0.308805	0.121066	-0.0137461	2.44122	1.41496	0.735798	0.434275	0.284326	0.233593	0.0785936	-0.0192386
	1.02333	3.03808	2.02791	1.29336	0.802275	0.483239	0.309907	0.127282	-0.0148924	2.44434	1.41135	0.737901	0.427465	0.285067	0.233798	0.0744852	-0.0230506
	1.02667	3.03599	2.02749	1.29902	0.804206	0.483186	0.313376	0.12306	-0.0132946	2.44646	1.41682	0.733564	0.430823	0.287217	0.235891	0.0795066	-0.027399
	1.03	3.04578	2.0262	1.29718	0.801893	0.483271	0.309005	0.123048	-0.0145819	2.45382	1.41652	0.731988	0.433254	0.285365	0.234328	0.0769039	-0.0264456
	1.03333	3.04487	2.03072	1.30234	0.806357	0.481874	0.312623	0.121012	-0.0159102	2.45297	1.42243	0.731367	0.434047	0.285105	0.23214	0.0791499	-0.0253053
	1.03667	3.05113	2.03363	1.30258	0.808547	0.484575	0.314586	0.121731	-0.0107359	2.45771	1.42242	0.735849	0.43417	0.28459	0.228846	0.0756367	-0.0240175
	1.04	3.05043	2.04084	1.30182	0.812138	0.483219	0.312454	0.123438	-0.016185	2.46323	1.42754	0.733628	0.436891	0.282672	0.23563	0.0781182	-0.019194
	1.04333	3.05947	2.0365	1.30466	0.803845	0.488	0.308711	0.12107	-0.017656	2.4614	1.42694	0.730127	0.432874	0.287345	0.233552	0.0778867	-0.0253118
	1.04667	3.05996	2.04251	1.30281	0.814956	0.485453	0.311421	0.126042	-0.0164142	2.47045	1.42689	0.736981	0.43538	0.28634	0.233541	0.0745243	-0.0232438
	1.05	3.06277	2.04406	1.30607	0.806519	0.486558	0.31107	0.128195	-0.0133244	2.46956	1.42668	0.735975	0.435578	0.286638	0.239179	0.077209	-0.0250075
	1.05333	3.06329	2.04657	1.30444	0.80876	0.484777	0.315766	0.12431	-0.0179557	2.47275	1.43414	0.740574	0.435754	0.287436	0.234426	0.0757183	-0.0238844
	1.05667	3.06914	2.04422	1.30656	0.810281	0.483882	0.308171	0.125464	-0.0126818	2.47219	1.43296	0.736913	0.435618	0.284308	0.236797	0.0730084	-0.0242469
	1.06	3.06972	2.05083	1.30297	0.81019	0.483524	0.311398	0.121775	-0.0152617	2.47771	1.43479	0.736904	0.432516	0.287153	0.232194	0.0781246	-0.0249321
	1.06333	3.07022	2.05544	1.31086	0.810692	0.491047	0.308283	0.121998	-0.0107793	2.4778	1.44063	0.740143	0.431561	0.287233	0.233634	0.0798447	-0.0224889
	1.06667	3.07453	2.05471	1.31073	0.815071	0.48385	0.311389	0.12581	-0.0145117	2.48366	1.44598	0.74179	0.433394	0.28864	0.23753	0.0818103	-0.0242159
	1.07	3.08014	2.05644	1.32017	0.814577	0.487344	0.317155	0.127168	-0.0107312	2.48677	1.44581	0.743256	0.437118	0.289799	0.236492	0.0775471	-0.0260879
	1.07333	3.08326	2.0555	1.31335	0.813025	0.485721	0.312797	0.123564	-0.0152719	2.48998	1.44286	0.740212	0.43245	0.290185	0.234416	0.0734073	-0.0238999
	1.07667	3.08306	2.06176	1.31241	0.813558	0.487371	0.315796	0.123341	-0.0164146	2.48741	1.44958	0.745284	0.433398	0.28709	0.234447	0.0795694	-0.0224135
	1.08	3.09224	2.05973	1.31636	0.813113	0.488411	0.313496	0.122772	-0.0143637	2.49555	1.45008	0.744287	0.435124	0.287893	0.23957	0.0784807	-0.0253116
	1.08333	3.09124	2.06831	1.31713	0.812345	0.491913	0.31425	0.128087	-0.0122334	2.49565	1.45444	0.743375	0.437681	0.288295	0.2377	0.0750618	-0.0255454
	1.08667	3.08963	2.06978	1.31649	0.820317	0.492897	0.314583	0.121117	-0.0155662	2.49977	1.44993	0.745748	0.435508	0.290167	0.236153	0.0788225	-0.0248674
	1.09	3.09782	2.06625	1.32111	0.818265	0.489095	0.308307	0.119694	-0.0145593	2.50148	1.45398	0.748222	0.437432	0.290359	0.23771	0.0834917	-0.0229487
	1.09333	3.09915	2.07061	1.31574	0.814221	0.491304	0.312669	0.127669	-0.0139303	2.50476	1.4553	0.751435	0.430056	0.287289	0.233652	0.0767016	-0.02462
	1.09667	3.10153	2.074	1.32437	0.817588	0.488516	0.314842	0.127726	-0.0199812	2.51052	1.45395	0.751194	0.433654	0.290062	0.237849	0.0802784	-0.0260542
	1.1	3.10392	2.07244	1.3262	0.816597	0.489822	0.311558	0.12896	-0.0149192	2.50844	1.45965	0.75079	0.439788	0.288307	0.2377	0.0791011	-0.022187
	1.10333	3.1062	2.07202	1.32162	0.819906	0.489152	0.31623	0.127844	-0.0155749	2.51624	1.4625	0.747671	0.438643	0.289865	0.23363	0.0801089	-0.0276202
	1.10667	3.10873	2.07802	1.33029	0.819674	0.491821	0.3195	0.121264	-0.0159422	2.5209	1.46736	0.746297	0.44083	0.288654	0.239053	0.0780151	-0.0246269
	1.11	3.1137	2.07911	1.32449	0.824581	0.493596	0.312567	0.124391	-0.0139412	2.52257	1.46617	0.748422	0.440507	0.29026	0.236335	0.0808765	-0.0289014
	1.11333	3.1122	2.08581	1.32848	0.820009	0.491447	0.315829	0.126949	-0.01456	2.52358	1.46405	0.75219	0.437574	0.291349	0.237071	0.0738772	-0.0252581
	1.11667	3.1168	2.08113	1.32921	0.821288	0.491609	0.319276	0.127425	-0.0172976	2.52341	1.4674	0.752575	0.440242	0.282667	0.237648	0.0768111	-0.0270844
	1.12	3.12417	2.08465	1.33284	0.82425	0.490111	0.314757	0.126061	-0.0159019	2.52933	1.46816	0.752761	0.440034	0.290398	0.234064	0.0781684	-0.0285755
	1.12333	3.12403	2.08663	1.33125	0.818893	0.489865	0.316346	0.128356	-0.017408	2.53368	1.47167	0.755806	0.439678	0.291088	0.238413	0.0758549	-0.0281561
	1.12667	3.12642	2.09566	1.33029	0.820595	0.490231	0.311963	0.13233	-0.0176697	2.53638	1.47151	0.753336	0.440176	0.290992	0.236522	0.0777554	-0.0272567
	1.13	3.12743	2.0975	1.3333	0.824182	0.48945	0.315042	0.125808	-0.0180175	2.53762	1.47446	0.752941	0.440217	0.290438	0.240983	0.0788081	-0.0221074
	1.13333	3.13494	2.10308	1.33385	0.818135	0.488514	0.314155	0.130085	-0.0157984	2.53598	1.47907	0.758561	0.439007	0.29294	0.237257	0.0788373	-0.0223194
	1.13667	3.13452	2.09683	1.33311	0.82769	0.49454	0.314235	0.128091	-0.0176184	2.54325	1.47968	0.756241	0.439204	0.288221	0.235783	0.0784585	-0.0279965
	1.14	3.13994	2.10138	1.33542	0.825159	0.494401	0.316474	0.129324	-0.0151443	2.54887	1.48473	0.761826	0.444908	0.285598	0.235424	0.0753357	-0.0255106
	1.14333	3.1413	2.10232	1.34354	0.821303	0.489474	0.311502	0.124623	-0.0146294	2.54192	1.48152	0.759908	0.441976	0.2902	0.236015	0.0758732	-0.0222099
	1.14667	3.14319	2.10825	1.34003	0.829147	0.491536	0.317479	0.127374	-0.0131362	2.54822	1.48976	0.758208	0.434409	0.287594	0.238793	0.0778154	-0.029512
	1.15	3.14083	2.10374	1.34077	0.824385	0.494856	0.31421	0.12899	-0.0113022	2.552	1.48961	0.758781	0.443504	0.287444	0.23195	0.0732398	-0.0241473
	1.15333	3.14823	2.10763	1.34208	0.827951	0.489549	0.315203	0.125265	-0.0165591	2.55543	1.4885	0.75822	0.442934	0.289066	0.239559	0.0794858	-0.0240395
	1.15667	3.15057	2.10833	1.34039	0.827128	0.494687	0.312602	0.128624	-0.0146559	2.55908	1.49478	0.760742	0.440775	0.290762	0.237255	0.0771321	-0.029126
	1.16	3.15349	2.11145	1.34274	0.827843	0.493229	0.319399	0.126494	-0.0180835	2.56262	1.49365	0.761801	0.443971	0.292052	0.237532	0.0787256	-0.0298994
	1.16333	3.15604	2.12061	1.34636	0.828472	0.49542	0.320885	0.128788	-0.0166807	2.56623	1.49174	0.759402	0.443103	0.288308	0.236137	0.0829495	-0.0268461
	1.16667	3.15539	2.11618	1.34447	0.828262	0.493571	0.314301	0.130035	-0.0167869	2.57205	1.49855	0.763131	0.439596	0.29087	0.235931	0.0795392	-0.0278943
	1.17	3.15949	2.11782	1.34449	0.827341	0.495121	0.314822	0.12742	-0.0155706	2.56906	1.5009	0.763448	0.437446	0.287282	0.235296	0.0808536	-0.0242758
	1.17333	3.16197	2.12381	1.34525	0.831612	0.4989	0.317319	0.129299	-0.013544	2.5737	1.50368	0.765023	0.441824	0.295041	0.238029	0.0791635	-0.0265867
	1.17667	3.16469	2.12122	1.348	0.829303	0.493561	0.31782	0.131701	-0.0191795	2.57525	1.50196	0.765353	0.442412	0.294453	0.234668	0.0771496	-0.0245042
	1.18	3.16911	2.11754	1.35073	0.828116	0.495428	0.31816	0.131626	-0.0171318	2.57495	1.50601	0.769286	0.440695	0.291135	0.235744	0.079102	-0.0280573
	1.18333	3.1721	2.12788	1.35349	0.834139	0.495054	0.322202	0.129844	-0.0159313	2.58413	1.50795	0.765325	0.442448	0.289727	0.23689	0.0802206	-0.029179
	1.18667	3.17287	2.12517	1.35547	0.832261	0.494559	0.318507	0.126636	-0.0132233	2.58547	1.50761	0.762972	0.443459	0.291538	0.236905	0.0763093	-0.0289859
	1.19	3.17588	2.12797	1.35641	0.835888	0.502667	0.319231	0.132462	-0.0145772	2.58512	1.51392	0.763396	0.44155	0.290051	0.235039	0.0767205	-0.0273017
	1.19333	3.18664	2.13299	1.35492	0.835283	0.495871	0.317179	0.130979	-0.0178218	2.5892	1.5102	0.772158	0.442981	0.289841	0.243168	0.0792859	-0.0294628
	1.19667	3.18187	2.13131	1.35742	0.832867	0.49684	0.319229	0.131469	-0.013557	2.59558	1.51286	0.767169	0.447588	0.290255	0.236882	0.0800316	-0.0298029
	1.2	3.18744	2.13724	1.36003	0.838394	0.497449	0.315597	0.128787	-0.0184361	2.59945	1.51844	0.76491	0.445467	0.290483	0.239309	0.0755139	-0.0285409
	1.20333	3.18616	2.13825	1.35945	0.837091	0.498159	0.317756	0.129597	-0.0173067	2.59633	1.5177	0.767694	0.444277	0.291655	0.237103	0.0768667	-0.0278587
	1.20667	3.19032	2.13886	1.3643	0.836549	0.496178	0.319437	0.12703	-0.0133773	2.59547	1.51768	0.769454	0.44514	0.287657	0.240751	0.080966	-0.022869
	1.21	3.19693	2.14165	1.35957	0.830849	0.499329	0.317207	0.129634	-0.0151599	2.60689	1.51691	0.769914	0.445976	0.291562	0.235696	0.0816381	-0.0264548
	1.21333	3.19604	2.14412	1.36172	0.835512	0.496757	0.317844	0.130443	-0.0172001	2.6024	1.52156	0.772232	0.447137	0.290084	0.239956	0.0846937	-0.0265447
	1.21667	3.19783	2.14487	1.36571	0.838186	0.496062	0.320806	0.129784	-0.018255	2.60997	1.52638	0.767038	0.446601	0.293001	0.239846	0.0786482	-0.0226618
	1.22	3.2011	2.14788	1.36558	0.836937	0.498614	0.320006	0.134465	-0.016102	2.6068	1.53038	0.77613	0.446581	0.289688	0.239992	0.0780811	-0.0321863
	1.22333	3.20129	2.15085	1.36346	0.840007	0.499311	0.320941	0.128328	-0.0172706	2.61222	1.52563	0.772438	0.445883	0.291702	0.240286	0.0796995	-0.0292944
	1.22667	3.21015	2.15074	1.36594	0.838723	0.500937	0.321769	0.129292	-0.0120919	2.61446	1.52876	0.774407	0.447522	0.295378	0.239406	0.0821491	-0.0237846
	1.23	3.20978	2.15144	1.36956	0.843305	0.498865	0.320512	0.13116	-0.0187247	2.61736	1.53162	0.773953	0.442387	0.290257	0.23793	0.080946	-0.0285301
	1.23333	3.21052	2.15395	1.37	0.839838	0.499126	0.319251	0.13256	-0.0180563	2.61894	1.5326	0.774643	0.446454	0.28859	0.243158	0.080855	-0.0300426
	1.23667	3.20714	2.16158	1.36837	0.842071	0.499835	0.315038	0.131771	-0.014746	2.62069	1.53946	0.778633	0.447761	0.29249	0.237243	0.0827669	-0.0287165
	1.24	3.21324	2.1562	1.3701	0.840399	0.496915	0.318782	0.134941	-0.0162514	2.62599	1.53731	0.777832	0.446163	0.291163	0.235387	0.0801297	-0.0272398
	1.24333	3.21654	2.15987	1.37327	0.841633	0.502084	0.318205	0.136088	-0.020238	2.62688	1.53904	0.775912	0.446612	0.298773	0.236921	0.0774724	-0.0258061
	1.24667	3.22313	2.16367	1.37104	0.845335	0.501016	0.321666	0.131045	-0.0172051	2.63167	1.54534	0.780481	0.451615	0.293446	0.23889	0.0797281	-0.0305859
	1.25	3.22707	2.162	1.3755	0.841931	0.501115	0.323544	0.132891	-0.0182326	2.63254	1.54359	0.777671	0.447056	0.290533	0.238139	0.0851183	-0.0276538
	1.25333	3.22752	2.1667	1.37506	0.843491	0.502284	0.318519	0.130178	-0.0185345	2.63764	1.54356	0.780651	0.446084	0.289329	0.241321	0.0802483	-0.0275309
	1.25667	3.23114	2.16836	1.3804	0.844128	0.505034	0.319782	0.1287	-0.0149441	2.64171	1.54687	0.781912	0.444286	0.291168	0.237755	0.0792591	-0.0272096
	1.26	3.23363	2.17431	1.37771	0.844103	0.504191	0.320892	0.131612	-0.0165304	2.64109	1.54424	0.779843	0.448148	0.293198	0.240921	0.0825201	-0.0285216
	1.26333	3.22855	2.17445	1.37888	0.843435	0.499115	0.320866	0.133968	-0.0189466	2.64111	1.54782	0.781546	0.448415	0.288608	0.239661	0.0801785	-0.0337532
	1.26667	3.23769	2.17722	1.38141	0.846559	0.500169	0.318286	0.133832	-0.0188359	2.64661	1.55176	0.777997	0.450008	0.29205	0.236278	0.0775884	-0.0260573
	1.27	3.23501	2.17922	1.38218	0.844864	0.50187	0.319815	0.131725	-0.0177196	2.65324	1.5552	0.780223	0.444993	0.295828	0.235111	0.0796877	-0.0269143
	1.27333	3.24171	2.18068	1.38301	0.846506	0.498662	0.323888	0.131481	-0.019875	2.65018	1.55353	0.783395	0.440608	0.293069	0.233238	0.0800462	-0.0288428
	1.27667	3.23834	2.18482	1.38504	0.847702	0.502955	0.323433	0.129664	-0.0179633	2.65356	1.55573	0.786875	0.447328	0.294557	0.242527	0.0772905	-0.0292967
	1.28	3.24603	2.18796	1.38481	0.852046	0.507702	0.319341	0.13474	-0.0172452	2.65314	1.55563	0.783355	0.452749	0.293791	0.240074	0.08053	-0.0307645
	1.28333	3.24819	2.18603	1.38635	0.844054	0.501334	0.32142	0.134275	-0.0221845	2.65682	1.56036	0.783462	0.445632	0.290754	0.237925	0.0806047	-0.0287959
	1.28667	3.25225	2.18676	1.39056	0.853083	0.502204	0.325693	0.132643	-0.0145355	2.66243	1.56434	0.783085	0.452372	0.293628	0.237482	0.0821619	-0.0279601
	1.29	3.25566	2.18858	1.38846	0.848228	0.502626	0.323047	0.133408	-0.0181404	2.66086	1.56216	0.786852	0.449455	0.2961	0.244177	0.0765397	-0.0298018
	1.29333	3.25535	2.19325	1.38883	0.84502	0.497915	0.319502	0.130182	-0.0170682	2.66821	1.56855	0.785814	0.450668	0.292899	0.239534	0.0816226	-0.029985
	1.29667	3.25514	2.18958	1.39207	0.850705	0.502138	0.321349	0.13109	-0.0193482	2.66492	1.56808	0.786942	0.447797	0.296051	0.237649	0.0838487	-0.0278075
	1.3	3.26395	2.19313	1.39222	0.852227	0.508068	0.323168	0.139386	-0.0151383	2.66975	1.57058	0.788919	0.446317	0.295183	0.243277	0.0812788	-0.025845
	1.30333	3.26265	2.19588	1.39096	0.85383	0.50388	0.320576	0.133633	-0.0198451	2.66935	1.56933	0.789711	0.449318	0.297627	0.23807	0.075631	-0.0325435
	1.30667	3.26395	2.20204	1.39259	0.852107	0.504521	0.320115	0.129093	-0.0216845	2.67168	1.57129	0.789535	0.450877	0.292112	0.237456	0.0800075	-0.0297123
	1.31	3.26784	2.20431	1.3954	0.854404	0.508648	0.324845	0.136835	-0.0196502	2.68063	1.57025	0.792425	0.453682	0.294193	0.238603	0.0827212	-0.031815
	1.31333	3.27161	2.19838	1.39221	0.856575	0.503772	0.322311	0.134844	-0.018945	2.67946	1.57584	0.789749	0.447463	0.294451	0.241762	0.0797121	-0.0326078
	1.31667	3.26808	2.20398	1.39794	0.851423	0.506514	0.321822	0.13245	-0.0196036	2.68164	1.57857	0.792406	0.452266	0.295175	0.240064	0.0773018	-0.0276729
	1.32	3.27438	2.20606	1.39868	0.852416	0.506276	0.323485	0.135235	-0.0195125	2.68674	1.57849	0.793857	0.448731	0.29603	0.238123	0.0790791	-0.0278457
	1.32333	3.27315	2.20655	1.39781	0.858316	0.508345	0.323166	0.135871	-0.0151913	2.68614	1.58166	0.790564	0.450719	0.293748	0.237213	0.079573	-0.0294735
	1.32667	3.27579	2.20798	1.39597	0.853885	0.50877	0.322718	0.133864	-0.0161828	2.6904	1.58475	0.793948	0.451802	0.291456	0.239056	0.0772146	-0.031066
	1.33	3.27908	2.20753	1.4004	0.857057	0.504956	0.323977	0.134778	-0.0161234	2.68995	1.5864	0.793616	0.452936	0.290926	0.24012	0.08124	-0.0253271
	1.33333	3.28639	2.21405	1.4033	0.857657	0.505504	0.322393	0.133955	-0.022076	2.69824	1.58724	0.79348	0.453294	0.295388	0.242397	0.0796478	-0.0309719
	1.33667	3.2844	2.21559	1.40011	0.858839	0.505976	0.32172	0.137801	-0.0188125	2.69846	1.5878	0.791452	0.451287	0.29468	0.239682	0.0822471	-0.0309038
	1.34	3.2861	2.21397	1.4052	0.856353	0.504011	0.319465	0.131361	-0.0178431	2.70348	1.5898	0.797972	0.456144	0.293448	0.239177	0.0806625	-0.0324821
	1.34333	3.29396	2.21934	1.40403	0.855062	0.505659	0.32552	0.132382	-0.0186052	2.70044	1.59094	0.796977	0.453785	0.297268	0.241987	0.0753522	-0.0293385
	1.34667	3.29529	2.22003	1.40563	0.860516	0.507575	0.321325	0.134266	-0.0202887	2.69935	1.59251	0.795851	0.451678	0.296018	0.240589	0.0802116	-0.0261894
	1.35	3.29412	2.22047	1.40658	0.862868	0.504763	0.325433	0.133678	-0.0220182	2.70839	1.59547	0.79804	0.454193	0.292822	0.239599	0.0822147	-0.0300782
	1.35333	3.29586	2.22277	1.40698	0.859972	0.509498	0.32572	0.139743	-0.0202209	2.71093	1.5961	0.799152	0.453073	0.293334	0.241183	0.0781827	-0.0300556
	1.35667	3.30043	2.22336	1.40759	0.856581	0.50885	0.326181	0.133146	-0.0191514	2.71148	1.59717	0.799765	0.453222	0.291525	0.238689	0.0779384	-0.0308678
	1.36	3.30119	2.225	1.41286	0.857498	0.508772	0.319929	0.138535	-0.0172918	2.71254	1.59898	0.797353	0.452996	0.295902	0.242953	0.0815358	-0.0313958
	1.36333	3.30418	2.2316	1.40998	0.859034	0.507824	0.324139	0.134687	-0.0192283	2.71779	1.599	0.798713	0.452693	0.295382	0.241587	0.0818051	-0.031581
	1.36667	3.30801	2.23201	1.41403	0.86437	0.506408	0.323239	0.130235	-0.0195143	2.71732	1.60623	0.799652	0.453836	0.298951	0.240755	0.0825869	-0.0286504
	1.37	3.30323	2.23243	1.41409	0.862781	0.510787	0.325652	0.133491	-0.0175175	2.7185	1.60498	0.799497	0.45193	0.294621	0.237321	0.0824905	-0.0316396
	1.37333	3.31336	2.23367	1.41565	0.865148	0.510643	0.323661	0.136226	-0.0224752	2.72292	1.6074	0.797674	0.454366	0.290814	0.243216	0.0804202	-0.031852
	1.37667	3.31247	2.23753	1.41565	0.861501	0.513305	0.324763	0.134647	-0.0197381	2.72402	1.60406	0.802218	0.453387	0.295776	0.2414	0.0797002	-0.0328638
	1.38	3.31433	2.24143	1.41645	0.862764	0.508182	0.327838	0.132783	-0.0212992	2.72569	1.60292	0.801629	0.454023	0.294938	0.243096	0.0825106	-0.0314309
	1.38333	3.31646	2.24196	1.41415	0.862208	0.509221	0.327956	0.135305	-0.0192519	2.73247	1.61617	0.803874	0.454151	0.295742	0.239792	0.0839388	-0.028132
	1.38667	3.31603	2.24081	1.42385	0.863553	0.508091	0.330317	0.137734	-0.0199978	2.73408	1.60796	0.804655	0.457746	0.297169	0.242119	0.081543	-0.0308157
	1.39	3.32239	2.2471	1.41859	0.865393	0.510976	0.324737	0.133488	-0.0195996	2.7325	1.61421	0.805041	0.45684	0.296727	0.239728	0.0773084	-0.0317488
	1.39333	3.32821	2.24609	1.42226	0.864928	0.512874	0.328747	0.137678	-0.0260078	2.73801	1.61727	0.802399	0.455346	0.296356	0.238336	0.0822856	-0.031654
	1.39667	3.32797	2.24859	1.41987	0.864107	0.509753	0.327019	0.133248	-0.0197947	2.73551	1.61848	0.812152	0.459944	0.296814	0.240135	0.0792439	-0.0314876
	1.4	3.32978	2.25027	1.42189	0.865718	0.511374	0.328194	0.136694	-0.0247891	2.74778	1.62374	0.806237	0.452318	0.29307	0.239439	0.0809489	-0.0296768
	1.40333	3.33291	2.24836	1.42372	0.86654	0.512053	0.325753	0.138923	-0.0166931	2.7398	1.62508	0.808987	0.455679	0.297006	0.242732	0.0853687	-0.02911
	1.40667	3.33466	2.25483	1.42517	0.867271	0.513566	0.32502	0.136787	-0.0163906	2.74126	1.62529	0.806937	0.45927	0.296705	0.244619	0.0813345	-0.0312098
	1.41	3.33274	2.25885	1.42527	0.865648	0.513784	0.324367	0.138396	-0.0227241	2.74842	1.6255	0.807362	0.458374	0.299531	0.239952	0.08384	-0.0310777
	1.41333	3.34035	2.25966	1.42511	0.868556	0.509814	0.328017	0.134572	-0.0172374	2.74976	1.62596	0.812578	0.457309	0.297625	0.240107	0.0812248	-0.0342275
	1.41667	3.33956	2.26029	1.42662	0.866368	0.512598	0.32313	0.137928	-0.0175806	2.75096	1.62661	0.810838	0.458771	0.298143	0.238192	0.0807835	-0.0307349
	1.42	3.34136	2.26133	1.42924	0.866747	0.507339	0.321712	0.135863	-0.0258349	2.75408	1.63107	0.811104	0.460408	0.297685	0.242452	0.0827069	-0.0303365
	1.42333	3.34638	2.2634	1.43253	0.867982	0.511281	0.325003	0.13546	-0.0217917	2.75037	1.6326	0.811686	0.455163	0.2973	0.239739	0.0803263	-0.0319099
	1.42667	3.34314	2.26497	1.43266	0.872453	0.513762	0.325756	0.135405	-0.0217299	2.75859	1.63204	0.812211	0.461006	0.297494	0.241851	0.0796502	-0.0309872
	1.43	3.34803	2.26543	1.4341	0.870738	0.514679	0.328989	0.137235	-0.0256585	2.75961	1.63488	0.815008	0.459489	0.299097	0.243509	0.0812032	-0.0344286
	1.43333	3.35041	2.26982	1.43203	0.872542	0.514111	0.329458	0.138096	-0.0217321	2.76443	1.6376	0.811704	0.456235	0.298102	0.244533	0.0802123	-0.0322478
	1.43667	3.35458	2.26752	1.43854	0.873427	0.512251	0.328972	0.136621	-0.0196965	2.76556	1.63725	0.815952	0.458578	0.294688	0.243175	0.0793787	-0.0313192
	1.44	3.35228	2.2721	1.43498	0.871733	0.511561	0.332095	0.136395	-0.0225457	2.76646	1.6434	0.814405	0.458397	0.299289	0.242848	0.0805514	-0.0315489
	1.44333	3.35674	2.27463	1.44048	0.872547	0.512446	0.325322	0.136292	-0.0219955	2.77229	1.642	0.812643	0.455225	0.297752	0.243694	0.0817313	-0.0346328
	1.44667	3.36209	2.27689	1.4388	0.875642	0.513717	0.325881	0.140652	-0.0176581	2.76968	1.64146	0.820011	0.459782	0.294722	0.239424	0.0791893	-0.0315915
	1.45	3.36106	2.27794	1.43747	0.872056	0.512157	0.32495	0.13521	-0.0195403	2.77462	1.64229	0.816596	0.459619	0.297725	0.241924	0.0823169	-0.0336436
	1.45333	3.36639	2.28242	1.43597	0.870876	0.512251	0.328122	0.135313	-0.0223737	2.77601	1.64522	0.819959	0.457191	0.299787	0.237446	0.0837358	-0.0344245
	1.45667	3.36321	2.28367	1.43885	0.873708	0.514112	0.326768	0.143148	-0.0220037	2.77791	1.64664	0.815751	0.454443	0.298196	0.241189	0.0812835	-0.0320418
	1.46	3.36769	2.28192	1.44084	0.871212	0.510733	0.329523	0.135558	-0.0200617	2.78447	1.65068	0.820048	0.460057	0.299745	0.239577	0.0844066	-0.0303279
	1.46333	3.3742	2.28265	1.44779	0.874969	0.511338	0.325256	0.141228	-0.0227064	2.78148	1.65239	0.818228	0.45618	0.297141	0.241667	0.0799559	-0.0288881
	1.46667	3.37419	2.28244	1.4484	0.876279	0.51423	0.329437	0.131366	-0.0172224	2.7819	1.65211	0.821182	0.462351	0.296907	0.243024	0.0825324	-0.0344636
	1.47	3.37712	2.28886	1.44928	0.879982	0.513723	0.328123	0.137545	-0.0255536	2.78215	1.65526	0.823507	0.459027	0.30091	0.237348	0.0816909	-0.034182
	1.47333	3.37536	2.29169	1.44322	0.875248	0.516723	0.327203	0.136727	-0.0221168	2.78712	1.65456	0.818935	0.458515	0.297629	0.241654	0.0817016	-0.0328432
	1.47667	3.38174	2.29059	1.44709	0.881493	0.51361	0.323748	0.140139	-0.0211034	2.78831	1.66196	0.818766	0.460834	0.295411	0.24352	0.0805869	-0.03258
	1.48	3.38278	2.29086	1.4506	0.876489	0.519096	0.33072	0.134893	-0.021629	2.79166	1.66171	0.82515	0.460675	0.294784	0.242589	0.0806559	-0.0284762
	1.48333	3.38052	2.29873	1.45098	0.877489	0.516049	0.328645	0.136731	-0.0224675	2.79305	1.66091	0.824819	0.460997	0.300018	0.243271	0.079195	-0.0304925
	1.48667	3.38321	2.29513	1.44972	0.879771	0.512403	0.329	0.138819	-0.0214751	2.79736	1.65967	0.82402	0.461416	0.295814	0.2449	0.0807054	-0.0295739
	1.49	3.39014	2.30184	1.45275	0.879612	0.516869	0.328476	0.139921	-0.0227987	2.80205	1.66143	0.824467	0.463676	0.293312	0.243555	0.0871118	-0.0328035
	1.49333	3.38771	2.29897	1.45263	0.883409	0.518396	0.326093	0.138167	-0.0206538	2.798	1.6695	0.823431	0.459401	0.301263	0.23835	0.0809028	-0.0334272
	1.49667	3.38748	2.30307	1.4568	0.87903	0.518598	0.329518	0.135387	-0.0229644	2.80433	1.66779	0.827674	0.458023	0.295137	0.239067	0.0828943	-0.0347929
	1.5	3.39451	2.30923	1.45531	0.882547	0.514673	0.328424	0.135602	-0.0237511	2.80996	1.67189	0.829473	0.46357	0.297803	0.244538	0.0852432	-0.029171
	1.50333	3.3958	2.30638	1.45374	0.880303	0.518924	0.327485	0.142231	-0.0205466	2.81176	1.66742	0.826973	0.462729	0.295177	0.245951	0.0837045	-0.033151
	1.50667	3.40069	2.30785	1.45541	0.88282	0.519247	0.330042	0.1391	-0.0265574	2.81055	1.67542	0.828798	0.459969	0.296336	0.23923	0.0789276	-0.0373373
	1.51	3.39693	2.31216	1.45558	0.877898	0.517884	0.328123	0.140894	-0.0248249	2.8109	1.67422	0.828965	0.461838	0.298883	0.243753	0.0822967	-0.03175
	1.51333	3.40026	2.31415	1.46	0.887184	0.517101	0.32906	0.137371	-0.0204393	2.81263	1.67526	0.82638	0.46038	0.300001	0.239686	0.083572	-0.0375523
	1.51667	3.40355	2.31138	1.46058	0.884713	0.517146	0.331234	0.135176	-0.0260411	2.8148	1.67543	0.830742	0.461285	0.295601	0.241606	0.0841791	-0.0342889
	1.52	3.40631	2.3102	1.46001	0.88263	0.515503	0.330293	0.134309	-0.0223691	2.8164	1.67718	0.828956	0.459271	0.295391	0.243846	0.0819068	-0.0326844
	1.52333	3.40794	2.32001	1.45777	0.883931	0.515521	0.332784	0.138815	-0.0249487	2.82148	1.68338	0.829155	0.458484	0.295253	0.240276	0.0806657	-0.0325177
	1.52667	3.40889	2.31975	1.45913	0.886444	0.517509	0.328271	0.139062	-0.0255485	2.82306	1.67796	0.827387	0.465197	0.292216	0.240269	0.0854524	-0.0320684
	1.53	3.41484	2.32203	1.46443	0.88129	0.518659	0.329126	0.139281	-0.0207949	2.82651	1.68592	0.830766	0.461706	0.2981	0.239874	0.0826347	-0.0311563
	1.53333	3.41275	2.31938	1.4625	0.888822	0.518878	0.329102	0.138754	-0.0251688	2.83028	1.67895	0.831781	0.459181	0.298191	0.241194	0.0823024	-0.033609
	1.53667	3.41179	2.32776	1.46347	0.885219	0.517201	0.330201	0.138865	-0.0227466	2.82982	1.68307	0.833266	0.463213	0.30033	0.244594	0.0817692	-0.0298422
	1.54	3.41808	2.31988	1.47121	0.890551	0.516381	0.330279	0.136974	-0.0209122	2.83425	1.68924	0.834884	0.464027	0.301047	0.244351	0.0822726	-0.037497
	1.54333	3.42057	2.33024	1.46774	0.889332	0.516967	0.330653	0.139721	-0.0220559	2.83121	1.69258	0.832346	0.465984	0.297898	0.245417	0.0804671	-0.029336
	1.54667	3.41892	2.32727	1.47053	0.888426	0.520175	0.328199	0.140841	-0.0240997	2.83649	1.68924	0.834961	0.462276	0.299523	0.245394	0.082726	-0.0349782
	1.55	3.42694	2.333	1.46668	0.889364	0.519973	0.335377	0.141724	-0.0234017	2.83622	1.69187	0.834725	0.462002	0.295539	0.242511	0.0810236	-0.0336583
	1.55333	3.42304	2.33325	1.47155	0.889981	0.524122	0.331065	0.140026	-0.021601	2.83808	1.69635	0.835289	0.464562	0.298923	0.244533	0.0815068	-0.0344782
	1.55667	3.42729	2.33482	1.47405	0.888396	0.520419	0.327246	0.140412	-0.0303206	2.84126	1.69831	0.832411	0.462603	0.299385	0.240764	0.0773271	-0.0376045
	1.56	3.43091	2.33439	1.46948	0.891906	0.520128	0.330252	0.135889	-0.0280314	2.84362	1.69714	0.834361	0.465754	0.299608	0.244797	0.0798981	-0.0321227
	1.56333	3.43371	2.33906	1.47758	0.88695	0.521382	0.330654	0.139054	-0.0237711	2.84423	1.70049	0.836129	0.460632	0.298674	0.244378	0.0805268	-0.037694
	1.56667	3.43155	2.33843	1.4766	0.889912	0.520186	0.326647	0.140769	-0.0232124	2.85168	1.70312	0.838943	0.463935	0.298781	0.240497	0.0816306	-0.035612
	1.57	3.4305	2.34245	1.47365	0.891801	0.522882	0.330619	0.136445	-0.0220236	2.84925	1.70212	0.83908	0.464351	0.300416	0.245117	0.0830898	-0.0345429
	1.57333	3.43944	2.34186	1.47894	0.89319	0.524086	0.334522	0.142174	-0.023008	2.85273	1.70475	0.840624	0.462064	0.302076	0.241014	0.0790684	-0.0325057
	1.57667	3.43644	2.33908	1.47642	0.897089	0.517246	0.333347	0.14132	-0.0276271	2.85246	1.70619	0.840444	0.465102	0.300709	0.24143	0.081469	-0.0350318
	1.58	3.43908	2.34784	1.47964	0.890821	0.523397	0.332113	0.137601	-0.026389	2.85598	1.70552	0.839338	0.462647	0.303767	0.244337	0.0769892	-0.0332711
	1.58333	3.44419	2.34754	1.48018	0.896816	0.519785	0.330324	0.143035	-0.0223956	2.86055	1.7063	0.839789	0.469231	0.300527	0.247542	0.0819508	-0.0348868
	1.58667	3.44363	2.34915	1.4803	0.891717	0.523487	0.331849	0.141505	-0.0243719	2.86019	1.70865	0.842647	0.466642	0.299553	0.247034	0.0828395	-0.0349146
	1.59	3.45022	2.35035	1.48196	0.894865	0.51935	0.332163	0.142069	-0.0245749	2.86119	1.71357	0.838903	0.468679	0.300717	0.241033	0.082872	-0.0346716
	1.59333	3.44739	2.3548	1.48182	0.895251	0.51838	0.328877	0.141499	-0.0243655	2.86497	1.71441	0.838842	0.465889	0.298109	0.247715	0.0776864	-0.0341897
	1.59667	3.45647	2.35252	1.48123	0.89479	0.522642	0.33558	0.14412	-0.0237222	2.86241	1.7095	0.8433	0.460577	0.29821	0.248313	0.0803157	-0.0324579
	1.6	3.45146	2.35666	1.48778	0.901084	0.520471	0.329454	0.140523	-0.0285864	2.86688	1.71587	0.845634	0.469825	0.30415	0.240274	0.0807912	-0.037659
	1.60333	3.45276	2.35946	1.48476	0.893855	0.521282	0.329294	0.139049	-0.0288936	2.86695	1.7155	0.846404	0.465187	0.298754	0.241442	0.0818345	-0.0367153
	1.60667	3.45822	2.359	1.48818	0.894648	0.520156	0.334922	0.139742	-0.0236323	2.87247	1.7162	0.847005	0.469738	0.299975	0.243381	0.0825158	-0.0363046
	1.61	3.46011	2.36179	1.48277	0.896114	0.520642	0.332743	0.138519	-0.0276141	2.87054	1.7178	0.845928	0.468177	0.302465	0.241971	0.0851443	-0.03286
	1.61333	3.46149	2.36319	1.4889	0.900943	0.52378	0.332254	0.13801	-0.0234348	2.87574	1.72095	0.846505	0.46973	0.300053	0.242454	0.0817675	-0.0331473
	1.61667	3.46506	2.36218	1.49044	0.898604	0.522335	0.332206	0.141238	-0.0240169	2.87486	1.72633	0.844675	0.462558	0.295517	0.241177	0.0827014	-0.035115
	1.62	3.46379	2.36322	1.49191	0.899931	0.52513	0.333124	0.140289	-0.0244286	2.8729	1.72513	0.847907	0.464314	0.297418	0.241533	0.0828794	-0.0402984
	1.62333	3.46719	2.36859	1.49121	0.899965	0.522417	0.335434	0.140797	-0.0239155	2.8788	1.72751	0.848029	0.463498	0.298442	0.242969	0.0843665	-0.0331425
	1.62667	3.47109	2.37082	1.49253	0.90012	0.522456	0.33327	0.141151	-0.0233936	2.87763	1.73174	0.848729	0.466724	0.300759	0.243058	0.0834597	-0.0352154
	1.63	3.47331	2.36797	1.48953	0.897435	0.524401	0.331737	0.143978	-0.0288667	2.88191	1.72754	0.848587	0.463758	0.301809	0.24379	0.0844557	-0.0381542
	1.63333	3.47126	2.37224	1.49161	0.901836	0.52036	0.331483	0.144	-0.026607	2.88823	1.73139	0.845957	0.466134	0.300879	0.24531	0.0872884	-0.0364976
	1.63667	3.47455	2.37315	1.49544	0.898295	0.521861	0.328494	0.140717	-0.0248554	2.88827	1.73252	0.850852	0.466296	0.299812	0.244152	0.0804148	-0.0316525
	1.64	3.47203	2.38167	1.49315	0.896766	0.52619	0.33036	0.141814	-0.0231758	2.88932	1.7319	0.848974	0.466865	0.300815	0.246843	0.0824688	-0.0384794
	1.64333	3.48257	2.37968	1.49788	0.904185	0.526632	0.332301	0.139155	-0.0231136	2.89186	1.73989	0.850226	0.468314	0.300302	0.245814	0.0839028	-0.0352792
	1.64667	3.47584	2.37901	1.49616	0.903146	0.525513	0.332372	0.139505	-0.0210981	2.89032	1.73875	0.850663	0.469345	0.302076	0.245473	0.0811777	-0.0347213
	1.65	3.48181	2.37683	1.49822	0.902484	0.526968	0.33376	0.139137	-0.0263733	2.89889	1.73923	0.85371	0.464771	0.297869	0.244231	0.081104	-0.0370942
	1.65333	3.48212	2.38744	1.4984	0.902278	0.525504	0.333764	0.140607	-0.0249454	2.89616	1.73977	0.854616	0.46812	0.30375	0.242162	0.0839774	-0.0350927
	1.65667	3.48875	2.38551	1.50095	0.904092	0.524757	0.330511	0.138643	-0.0231608	2.90203	1.7422	0.858882	0.46755	0.303576	0.245967	0.0849341	-0.0373409
	1.66	3.48706	2.38444	1.50379	0.902315	0.52262	0.33153	0.142497	-0.025822	2.89604	1.74312	0.854388	0.466153	0.302484	0.241257	0.0837986	-0.0357439
	1.66333	3.4913	2.3835	1.50236	0.908352	0.525391	0.334965	0.139441	-0.0258877	2.90498	1.74251	0.853775	0.467585	0.301702	0.245437	0.0863583	-0.0354568
	1.66667	3.49034	2.38621	1.50329	0.907395	0.527986	0.332885	0.145871	-0.0252587	2.90263	1.74686	0.855552	0.464969	0.299436	0.246071	0.0793201	-0.0382584
	1.67	3.49351	2.38782	1.50291	0.905316	0.525072	0.336003	0.139083	-0.0231575	2.91067	1.74705	0.858758	0.465454	0.301222	0.244829	0.0801862	-0.0371464
	1.67333	3.48921	2.39184	1.50477	0.90805	0.526434	0.332863	0.143136	-0.0235674	2.90872	1.75077	0.857453	0.468157	0.300641	0.244096	0.0811714	-0.0399963
	1.67667	3.49319	2.39002	1.50899	0.902695	0.523106	0.333137	0.143647	-0.0226813	2.91375	1.75052	0.85991	0.468098	0.296655	0.245314	0.0818392	-0.0376315
	1.68	3.49534	2.39116	1.50969	0.910272	0.525834	0.332708	0.140469	-0.0238503	2.91415	1.75523	0.861527	0.467294	0.304557	0.244676	0.0865464	-0.0406096
	1.68333	3.50198	2.39854	1.50845	0.911498	0.525656	0.334377	0.144767	-0.0267778	2.9173	1.75282	0.859524	0.465916	0.303203	0.245155	0.0837672	-0.0412046
	1.68667	3.50295	2.39951	1.51068	0.910655	0.527067	0.334502	0.144726	-0.0231868	2.915	1.75463	0.859347	0.469135	0.301742	0.242552	0.0842159	-0.0325938
	1.69	3.50165	2.40139	1.51104	0.908611	0.528397	0.331965	0.144764	-0.0264087	2.91693	1.75832	0.859905	0.470643	0.302564	0.248914	0.0853724	-0.032754
	1.69333	3.50458	2.40265	1.5167	0.908735	0.525426	0.333924	0.142513	-0.0287805	2.92507	1.75937	0.859398	0.473095	0.301953	0.244088	0.0814339	-0.0362378
	1.69667	3.50624	2.40161	1.51343	0.907815	0.531974	0.335107	0.144445	-0.0261187	2.92159	1.76176	0.866632	0.471305	0.303808	0.244501	0.0883471	-0.0376538
	1.7	3.50925	2.40614	1.51511	0.911033	0.529572	0.330883	0.1445	-0.0220714	2.92108	1.76627	0.859618	0.467998	0.302381	0.244076	0.0849246	-0.035881
	1.70333	3.51247	2.40958	1.51542	0.913919	0.528565	0.333426	0.14356	-0.0293275	2.92576	1.76564	0.863455	0.471999	0.300028	0.247195	0.0838252	-0.0402677
	1.70667	3.51392	2.40925	1.51821	0.910736	0.527437	0.333606	0.14508	-0.0231072	2.92965	1.76563	0.862576	0.473596	0.299837	0.240449	0.0828981	-0.0370106
	1.71	3.51193	2.40829	1.51685	0.914536	0.528833	0.332539	0.144599	-0.0276642	2.92928	1.76594	0.864283	0.468936	0.302592	0.243188	0.0809667	-0.0398497
	1.71333	3.51687	2.4117	1.5167	0.91352	0.529541	0.334889	0.145638	-0.0259741	2.93196	1.77378	0.861514	0.469512	0.299929	0.243663	0.0867132	-0.0380145
	1.71667	3.51749	2.41184	1.51918	0.911396	0.532262	0.332434	0.143451	-0.0262177	2.94068	1.77	0.864742	0.469501	0.30337	0.246742	0.0765996	-0.0346297
	1.72	3.51979	2.41625	1.52374	0.917907	0.531126	0.334157	0.14211	-0.0256975	2.93264	1.77331	0.866465	0.469355	0.302227	0.249321	0.0831545	-0.0376414
	1.72333	3.52693	2.41681	1.52011	0.912713	0.529998	0.336416	0.141954	-0.0286479	2.93667	1.77299	0.864035	0.473613	0.300607	0.245822	0.0824828	-0.0398539
	1.72667	3.5203	2.41932	1.52404	0.912159	0.53385	0.334529	0.142883	-0.0266942	2.93586	1.77152	0.865373	0.47295	0.303701	0.242187	0.0821653	-0.0358541
	1.73	3.52522	2.42047	1.5217	0.914078	0.53299	0.335884	0.146452	-0.0261679	2.93874	1.77643	0.867025	0.468075	0.305209	0.244774	0.0821823	-0.0412915
	1.73333	3.52549	2.42282	1.52466	0.914361	0.53198	0.334054	0.145253	-0.0247486	2.94464	1.77764	0.868251	0.471992	0.300589	0.247288	0.0830263	-0.0362133
	1.73667	3.52822	2.42189	1.52757	0.910728	0.530355	0.339769	0.144646	-0.0239415	2.9439	1.77852	0.867666	0.473493	0.303645	0.244859	0.0830125	-0.0370195
	1.74	3.53334	2.42255	1.52445	0.919397	0.532804	0.336675	0.145995	-0.0294501	2.94381	1.7797	0.86633	0.473788	0.300488	0.246654	0.0857657	-0.0395908
	1.74333	3.5353	2.42361	1.52622	0.913178	0.526434	0.335579	0.141528	-0.0287948	2.95246	1.78344	0.870776	0.474194	0.303955	0.243177	0.0842703	-0.0369609
	1.74667	3.53268	2.43207	1.53038	0.918695	0.529709	0.334708	0.143559	-0.0232458	2.95246	1.78087	0.872252	0.472287	0.303252	0.245063	0.0850315	-0.0370114
	1.75	3.53316	2.4257	1.5282	0.917453	0.532836	0.335149	0.146098	-0.0297523	2.9509	1.78202	0.869403	0.474783	0.303726	0.243539	0.0812131	-0.03572
	1.75333	3.53476	2.43384	1.53082	0.914557	0.530924	0.335599	0.14272	-0.0266124	2.95621	1.78232	0.865637	0.47204	0.302598	0.250026	0.0827786	-0.0354493
	1.75667	3.54214	2.43139	1.53121	0.920482	0.529403	0.334936	0.141738	-0.0289151	2.95756	1.78581	0.871957	0.472476	0.301852	0.247963	0.0870614	-0.0357319
	1.76	3.54333	2.4321	1.529	0.923481	0.5307	0.33924	0.149088	-0.0271215	2.95531	1.79261	0.871273	0.474348	0.303712	0.242596	0.083356	-0.0409986
	1.76333	3.54012	2.43606	1.52937	0.918594	0.532041	0.335479	0.150195	-0.0277833	2.95697	1.78724	0.871457	0.470224	0.301583	0.246178	0.0811765	-0.0365527
	1.76667	3.54201	2.43543	1.53271	0.922097	0.528036	0.33593	0.143867	-0.0287762	2.96403	1.7936	0.869577	0.476828	0.303675	0.246189	0.0859442	-0.0371945
	1.77	3.54574	2.43892	1.53525	0.918687	0.535773	0.33871	0.144155	-0.0238233	2.96094	1.79203	0.872407	0.476011	0.300555	0.244778	0.0860689	-0.0395975
	1.77333	3.54572	2.43737	1.5379	0.922337	0.534151	0.33856	0.142152	-0.023437	2.96773	1.79795	0.878928	0.475873	0.302928	0.248549	0.0837197	-0.0390436
	1.77667	3.54879	2.44359	1.53298	0.923228	0.532262	0.333249	0.147332	-0.0236658	2.96795	1.79401	0.874665	0.473107	0.300562	0.249189	0.0830201	-0.0391697
	1.78	3.54861	2.44045	1.54094	0.92407	0.533347	0.335952	0.142642	-0.0259477	2.96787	1.79721	0.87808	0.473166	0.301828	0.243341	0.0821255	-0.0399028
	1.78333	3.55707	2.44465	1.53818	0.922118	0.528405	0.336253	0.142962	-0.0283222	2.96941	1.80085	0.87458	0.471512	0.304275	0.247361	0.0821582	-0.0411668
	1.78667	3.55166	2.44824	1.53631	0.922821	0.533395	0.338549	0.140888	-0.0280299	2.9726	1.80056	0.874761	0.47311	0.303838	0.24442	0.0820789	-0.0396336
	1.79	3.55634	2.44645	1.54109	0.921145	0.531986	0.335184	0.145324	-0.0262437	2.96959	1.8027	0.877055	0.473315	0.300204	0.244977	0.0846604	-0.0356846
	1.79333	3.55588	2.45067	1.54516	0.927611	0.532036	0.336716	0.145123	-0.0263997	2.97096	1.80097	0.879549	0.475123	0.302037	0.245278	0.0825846	-0.0380054
	1.79667	3.55825	2.44908	1.54429	0.921672	0.52745	0.338045	0.143752	-0.0278079	2.97815	1.80545	0.875004	0.472818	0.302048	0.24845	0.0830951	-0.0384612
	1.8	3.55427	2.45369	1.54086	0.923452	0.53057	0.336929	0.144656	-0.0293631	2.97759	1.80788	0.882586	0.4742	0.300742	0.24243	0.0835762	-0.0383705
	1.80333	3.56584	2.45552	1.54163	0.927012	0.535155	0.333136	0.144013	-0.0298647	2.97689	1.80724	0.882216	0.475046	0.303569	0.247187	0.0821482	-0.0347342
	1.80667	3.56475	2.45428	1.54681	0.927697	0.535074	0.337464	0.145433	-0.0252716	2.98239	1.80976	0.880667	0.475568	0.305513	0.242284	0.082547	-0.0412203
	1.81	3.56329	2.46044	1.54865	0.925745	0.530782	0.333704	0.141945	-0.0290726	2.98336	1.8086	0.883237	0.472617	0.3045	0.249482	0.0843314	-0.043153
	1.81333	3.56572	2.45877	1.54531	0.925721	0.533005	0.339551	0.145884	-0.0313738	2.98494	1.81504	0.881013	0.476181	0.303366	0.244987	0.0820767	-0.0355931
	1.81667	3.57136	2.45975	1.54963	0.929437	0.533455	0.337604	0.145187	-0.0259562	2.98976	1.8122	0.880143	0.476524	0.302056	0.248539	0.0813297	-0.037523
	1.82	3.57338	2.45965	1.54938	0.926427	0.532268	0.339495	0.145938	-0.0272356	2.98749	1.81445	0.877821	0.474875	0.303232	0.249504	0.0824034	-0.0404676
	1.82333	3.57388	2.46056	1.54689	0.928022	0.53372	0.337906	0.142066	-0.0251743	2.99075	1.81743	0.882863	0.475506	0.301582	0.244876	0.0848464	-0.0370279
	1.82667	3.57385	2.46361	1.54699	0.926689	0.532303	0.339217	0.146379	-0.0278591	2.99225	1.81516	0.886074	0.474616	0.30596	0.246617	0.0882064	-0.0380869
	1.83	3.57525	2.46766	1.55257	0.924978	0.530163	0.334785	0.14541	-0.0295735	2.99273	1.81642	0.88301	0.474932	0.304683	0.245907	0.0813912	-0.0389266
	1.83333	3.57692	2.46379	1.55028	0.926949	0.537426	0.338126	0.151381	-0.0264964	2.99221	1.82311	0.886702	0.474104	0.303475	0.248739	0.0871084	-0.035698
	1.83667	3.58161	2.46872	1.55597	0.925122	0.535604	0.33961	0.143603	-0.0288864	2.99916	1.82003	0.881087	0.474686	0.302954	0.245357	0.0845747	-0.0390647
	1.84	3.57947	2.46495	1.55463	0.928785	0.532735	0.338015	0.143516	-0.0296771	2.99668	1.82533	0.884725	0.475399	0.303122	0.248225	0.0899073	-0.0401253
	1.84333	3.57954	2.47297	1.55484	0.929358	0.540258	0.333835	0.144199	-0.0279227	2.9975	1.82504	0.887099	0.478818	0.303034	0.246387	0.080914	-0.0378993
	1.84667	3.5821	2.46997	1.55266	0.931932	0.536201	0.337867	0.15146	-0.0296509	3.00143	1.82182	0.885876	0.47893	0.305192	0.247338	0.0840541	-0.0388716
	1.85	3.58277	2.47406	1.55939	0.930405	0.53523	0.335844	0.149887	-0.0259211	3.0038	1.82508	0.887873	0.476141	0.305448	0.243441	0.0804329	-0.0353008
	1.85333	3.58476	2.47342	1.55906	0.933582	0.537255	0.336853	0.148508	-0.0250208	3.00287	1.82404	0.887765	0.476913	0.301815	0.246223	0.0847096	-0.0402081
	1.85667	3.58096	2.47538	1.55796	0.932507	0.533613	0.339415	0.147545	-0.0269538	3.00635	1.83567	0.888529	0.479766	0.306707	0.246324	0.084092	-0.0372984
	1.86	3.58807	2.48146	1.55957	0.930217	0.535046	0.337868	0.145815	-0.0284124	3.01139	1.83024	0.88889	0.475314	0.300108	0.245643	0.0831716	-0.039995
	1.86333	3.59246	2.47867	1.56228	0.935372	0.538336	0.336957	0.142494	-0.0245896	3.01409	1.83558	0.891651	0.47838	0.3025	0.247278	0.0866526	-0.0409666
	1.86667	3.59629	2.48473	1.56401	0.935552	0.53974	0.33873	0.145782	-0.0261938	3.0139	1.83068	0.890337	0.478677	0.306542	0.245003	0.0860113	-0.0379244
	1.87	3.59271	2.48269	1.56291	0.93101	0.540926	0.338506	0.151591	-0.0295146	3.01065	1.83468	0.889427	0.474151	0.302431	0.243225	0.081739	-0.037907
	1.87333	3.59391	2.4847	1.56252	0.937673	0.540227	0.338429	0.147727	-0.0293114	3.01394	1.83844	0.893979	0.480845	0.303664	0.243402	0.085704	-0.0375151
	1.87667	3.60005	2.49175	1.56531	0.933887	0.536901	0.338251	0.145659	-0.0269212	3.01724	1.84112	0.891248	0.479048	0.308642	0.245605	0.0863198	-0.0407782
	1.88	3.59369	2.48807	1.56266	0.9354	0.540044	0.339506	0.147628	-0.0250307	3.0185	1.84065	0.894023	0.476924	0.300603	0.244729	0.087929	-0.0402237
	1.88333	3.60259	2.48842	1.56946	0.938201	0.536463	0.335444	0.142543	-0.0300394	3.01979	1.84033	0.892307	0.479902	0.302219	0.247175	0.0819598	-0.0377897
	1.88667	3.60479	2.49064	1.56704	0.938841	0.534269	0.33882	0.148132	-0.029256	3.02314	1.84238	0.894381	0.477895	0.304909	0.247857	0.0838105	-0.0430871
	1.89	3.60474	2.49361	1.56996	0.936809	0.53864	0.336988	0.145593	-0.0303039	3.01916	1.84348	0.895275	0.477016	0.302981	0.24794	0.0834924	-0.0406689
	1.89333	3.60538	2.49051	1.56517	0.934828	0.536161	0.337808	0.147745	-0.0277213	3.02578	1.84275	0.892069	0.476254	0.302805	0.248216	0.0826974	-0.0386191
	1.89667	3.60246	2.49626	1.56764	0.936426	0.536395	0.339991	0.143765	-0.0262777	3.02798	1.85104	0.895447	0.477226	0.304562	0.248163	0.0851422	-0.0364756
	1.9	3.60771	2.49619	1.56807	0.940696	0.535716	0.33731	0.145565	-0.0234469	3.03099	1.84781	0.899479	0.474947	0.304677	0.2509	0.0821123	-0.0395277
	1.90333	3.60909	2.50187	1.57097	0.939986	0.540409	0.33552	0.148533	-0.0278319	3.0301	1.8492	0.898185	0.474219	0.303457	0.246786	0.0852588	-0.0420838
	1.90667	3.60816	2.50287	1.57384	0.940509	0.540705	0.336062	0.148886	-0.0285042	3.03434	1.84895	0.89902	0.480586	0.302085	0.247873	0.0827331	-0.0399632
	1.91	3.61444	2.50151	1.57446	0.93524	0.538534	0.33712	0.145879	-0.0285605	3.03521	1.85336	0.897582	0.480011	0.304931	0.247417	0.08623	-0.0420428
	1.91333	3.61545	2.50492	1.57591	0.933983	0.538212	0.343611	0.145703	-0.0330446	3.03408	1.84989	0.897079	0.478528	0.304954	0.248853	0.0823135	-0.0377155
	1.91667	3.61894	2.50512	1.57556	0.938995	0.533855	0.343101	0.145533	-0.0287641	3.03709	1.85253	0.898167	0.479263	0.304026	0.244964	0.0868895	-0.0419036
	1.92	3.62018	2.5068	1.57304	0.93987	0.542981	0.341631	0.147713	-0.0253639	3.03807	1.85386	0.897688	0.481819	0.308592	0.244321	0.0856329	-0.0410415
	1.92333	3.61995	2.50502	1.58119	0.941513	0.538972	0.340221	0.146379	-0.0269486	3.04152	1.85815	0.896102	0.477196	0.307913	0.252002	0.0836932	-0.0412322
	1.92667	3.61966	2.50883	1.57799	0.942491	0.540252	0.341477	0.151191	-0.0283761	3.0413	1.85957	0.902496	0.479195	0.302894	0.246578	0.0871317	-0.0394517
	1.93	3.62227	2.51401	1.58003	0.94271	0.541676	0.33852	0.147608	-0.0299961	3.04419	1.85837	0.903915	0.484714	0.30596	0.24828	0.0822735	-0.0370749
	1.93333	3.62324	2.51484	1.5786	0.940847	0.534663	0.336765	0.148088	-0.030045	3.04109	1.86418	0.904284	0.478965	0.302034	0.248239	0.0816107	-0.0435766
	1.93667	3.62856	2.51274	1.57912	0.943531	0.536828	0.339974	0.150188	-0.0315873	3.04877	1.8627	0.906652	0.483321	0.304871	0.249547	0.0807741	-0.04028
	1.94	3.62903	2.52004	1.58363	0.940869	0.540566	0.341392	0.148524	-0.025826	3.0423	1.86738	0.902087	0.482552	0.304618	0.245424	0.0827547	-0.0426982
	1.94333	3.63044	2.51093	1.58451	0.942454	0.540238	0.342883	0.144936	-0.0334742	3.05188	1.86602	0.90517	0.480065	0.304361	0.244841	0.0889181	-0.0434796
	1.94667	3.62984	2.51493	1.58872	0.948269	0.540543	0.338987	0.146397	-0.0332165	3.05055	1.86725	0.907193	0.48191	0.305979	0.249205	0.0839275	-0.0415515
	1.95	3.63257	2.52195	1.58593	0.945835	0.540769	0.339257	0.148854	-0.0315633	3.05322	1.86742	0.903531	0.481729	0.303771	0.249914	0.0822629	-0.0416504
	1.95333	3.63048	2.52425	1.58367	0.944341	0.540845	0.341634	0.149679	-0.0300876	3.05088	1.87071	0.903	0.477367	0.305759	0.245056	0.0810739	-0.0404708
	1.95667	3.63279	2.52326	1.58616	0.939077	0.543184	0.342521	0.149181	-0.0336981	3.05694	1.87465	0.904412	0.479152	0.301718	0.246316	0.0848125	-0.0440905
	1.96	3.63719	2.52503	1.58685	0.946146	0.541624	0.337967	0.147044	-0.0291273	3.06037	1.87154	0.906119	0.484173	0.304984	0.249934	0.0862727	-0.0395551
	1.96333	3.63735	2.52377	1.58779	0.942741	0.544224	0.340328	0.147815	-0.0292526	3.06177	1.87859	0.910022	0.48554	0.302725	0.248449	0.0817579	-0.0407043
	1.96667	3.63623	2.52802	1.58571	0.945181	0.539087	0.339018	0.145196	-0.0304902	3.06245	1.87232	0.905836	0.483168	0.305545	0.246538	0.0833211	-0.0418219
	1.97	3.6409	2.53052	1.591	0.948643	0.544014	0.342152	0.150148	-0.0285914	3.06598	1.87756	0.907144	0.481052	0.307835	0.245611	0.0802147	-0.0384787
	1.97333	3.64728	2.52719	1.59156	0.946547	0.544936	0.339032	0.144288	-0.0328157	3.06292	1.88032	0.909038	0.479473	0.305369	0.250265	0.0876988	-0.0423895
	1.97667	3.64074	2.53041	1.59474	0.948636	0.5415	0.341698	0.148001	-0.0318497	3.06487	1.87976	0.905105	0.482543	0.303362	0.248916	0.0839734	-0.0423928
	1.98	3.64678	2.53312	1.59388	0.948147	0.54101	0.339981	0.149604	-0.0250169	3.06375	1.87812	0.905688	0.482366	0.305724	0.248474	0.0817271	-0.0382116
	1.98333	3.64451	2.52983	1.59633	0.950371	0.542877	0.341541	0.148883	-0.0323462	3.06725	1.88215	0.912998	0.482302	0.297957	0.249865	0.0844791	-0.0415777
	1.98667	3.64809	2.53697	1.59656	0.945824	0.539208	0.340968	0.145121	-0.0284015	3.06984	1.88529	0.908196	0.483706	0.305225	0.248813	0.0858264	-0.040487
	1.99	3.65361	2.53572	1.59614	0.947066	0.543928	0.342906	0.146114	-0.0292663	3.07095	1.88151	0.90901	0.479266	0.307566	0.246168	0.082082	-0.0409763
	1.99333	3.64777	2.53787	1.5966	0.951534	0.53969	0.342415	0.147432	-0.0321103	3.07542	1.88569	0.913191	0.483814	0.308487	0.241836	0.0848051	-0.0424537
	1.99667	3.65672	2.53796	1.59657	0.948629	0.539494	0.342387	0.146627	-0.0334927	3.08124	1.88659	0.91167	0.480141	0.304968	0.246644	0.0843567	-0.0446828
	2	3.65412	2.54551	1.59829	0.949849	0.537742	0.342671	0.149403	-0.0280425	3.07548	1.88835	0.914762	0.48662	0.303045	0.246951	0.0856064	-0.0417283
	2.00333	3.65465	2.54349	1.59866	0.949588	0.542888	0.338777	0.150395	-0.0351673	3.07765	1.89144	0.912622	0.484141	0.304951	0.245689	0.0814248	-0.043794
	2.00667	3.65389	2.54147	1.60078	0.950074	0.543174	0.346938	0.145809	-0.0316125	3.0779	1.89084	0.912645	0.481571	0.305197	0.247057	0.0872277	-0.0421684
	2.01	3.65714	2.54327	1.60092	0.95351	0.544371	0.340723	0.148569	-0.0306398	3.08128	1.89241	0.915108	0.485372	0.305606	0.248206	0.0835442	-0.0401524
	2.01333	3.66134	2.54795	1.60427	0.954789	0.540629	0.34009	0.150692	-0.032272	3.08038	1.89537	0.913108	0.485371	0.30108	0.244514	0.0877331	-0.0414471
	2.01667	3.65997	2.54889	1.60113	0.952734	0.547837	0.341238	0.147326	-0.0297121	3.08185	1.89723	0.912392	0.483073	0.303106	0.249486	0.0826511	-0.0425167
	2.02	3.66305	2.55382	1.60221	0.954965	0.545609	0.340669	0.151728	-0.0329179	3.08679	1.89516	0.911691	0.482493	0.303185	0.2425	0.0827068	-0.0408514
	2.02333	3.66268	2.55169	1.60689	0.958605	0.543282	0.344805	0.147334	-0.0285927	3.0895	1.89881	0.911673	0.485559	0.302554	0.246249	0.0870089	-0.043124
	2.02667	3.66201	2.55516	1.60695	0.953945	0.544356	0.346525	0.147394	-0.0313905	3.08828	1.90264	0.922081	0.489207	0.306571	0.24889	0.0857841	-0.043419
	2.03	3.66937	2.55511	1.60516	0.954688	0.541879	0.34137	0.152031	-0.0336372	3.08957	1.90179	0.914801	0.485351	0.300057	0.247777	0.0856885	-0.0442843
	2.03333	3.67062	2.55277	1.60462	0.957614	0.543924	0.342263	0.150753	-0.0294082	3.09344	1.89876	0.917867	0.490232	0.302331	0.244623	0.0857283	-0.0365528
	2.03667	3.67358	2.55622	1.60653	0.952231	0.54311	0.342042	0.15055	-0.0309616	3.09661	1.90206	0.916131	0.486532	0.308728	0.247451	0.0811353	-0.0474012
	2.04	3.67351	2.55901	1.60922	0.953215	0.542503	0.342168	0.147129	-0.0324609	3.09869	1.90543	0.919325	0.481806	0.306118	0.245132	0.0852328	-0.0465898
	2.04333	3.67	2.55851	1.6119	0.956523	0.5415	0.345017	0.148706	-0.0293421	3.09687	1.90769	0.915931	0.485662	0.303682	0.246179	0.089033	-0.0369698
	2.04667	3.67856	2.56576	1.61285	0.955639	0.545116	0.342164	0.147083	-0.0262616	3.09969	1.90605	0.916397	0.487092	0.308322	0.252855	0.0836235	-0.0430468
	2.05	3.67407	2.56148	1.61395	0.955593	0.544094	0.343215	0.150151	-0.0324607	3.09896	1.91247	0.917622	0.485145	0.307062	0.249322	0.08543	-0.0464994
	2.05333	3.6754	2.5594	1.61206	0.956741	0.546817	0.344116	0.150885	-0.0325823	3.10243	1.91169	0.920019	0.489656	0.302845	0.251814	0.0824222	-0.0430338
	2.05667	3.6755	2.56699	1.61388	0.958693	0.545251	0.343415	0.147789	-0.0311699	3.1027	1.91635	0.9212	0.485457	0.309427	0.248808	0.0858223	-0.0408781
	2.06	3.68184	2.57257	1.6131	0.958228	0.546197	0.339249	0.152969	-0.0310548	3.09992	1.91192	0.924397	0.48691	0.303804	0.246955	0.0809414	-0.0419121
	2.06333	3.68347	2.5636	1.61329	0.959635	0.542037	0.341496	0.147088	-0.0323711	3.10905	1.91499	0.923772	0.486754	0.306392	0.249406	0.0866139	-0.0431335
	2.06667	3.68073	2.57317	1.6147	0.95872	0.546019	0.343128	0.149253	-0.0303604	3.11281	1.92332	0.92587	0.48242	0.30751	0.24482	0.084846	-0.0463288
	2.07	3.68525	2.57364	1.61983	0.958364	0.551588	0.340215	0.146888	-0.0332692	3.1073	1.9175	0.922187	0.4849	0.306753	0.249794	0.0881957	-0.0414253
	2.07333	3.68876	2.57444	1.6181	0.959883	0.543612	0.344466	0.149939	-0.0317427	3.106	1.91901	0.928533	0.484733	0.308561	0.246419	0.0840095	-0.0419905
	2.07667	3.68661	2.57294	1.61883	0.960837	0.549072	0.344057	0.15447	-0.0305746	3.10684	1.92265	0.92387	0.488544	0.306554	0.254141	0.0872498	-0.0429067
	2.08	3.68788	2.5759	1.62044	0.958393	0.544683	0.34462	0.149147	-0.0384306	3.11705	1.91884	0.923903	0.48744	0.307347	0.244351	0.0906805	-0.0402166
	2.08333	3.69056	2.57354	1.62309	0.958842	0.547702	0.342906	0.152341	-0.0317405	3.11113	1.92308	0.923526	0.488574	0.306915	0.248845	0.0866172	-0.0395487
	2.08667	3.6947	2.576	1.62632	0.964426	0.549071	0.343525	0.1541	-0.0297219	3.11597	1.9237	0.925127	0.488075	0.304234	0.248445	0.0827527	-0.0417865
	2.09	3.69471	2.57814	1.62103	0.962778	0.54278	0.341368	0.151537	-0.0346779	3.11806	1.92784	0.927231	0.485292	0.309335	0.247032	0.0843987	-0.0447411
	2.09333	3.69118	2.57687	1.62479	0.961556	0.545967	0.342994	0.150325	-0.0344462	3.11843	1.92834	0.924155	0.484881	0.306019	0.246375	0.0846974	-0.0402786
	2.09667	3.69574	2.58541	1.6244	0.961695	0.550191	0.345132	0.149353	-0.0351548	3.11859	1.92954	0.921038	0.487426	0.306704	0.245626	0.0865225	-0.0480179
	2.1	3.69482	2.58384	1.62448	0.962059	0.545683	0.341577	0.153582	-0.032881	3.11981	1.92649	0.925244	0.48688	0.305068	0.249561	0.0904951	-0.0454392
	2.10333	3.69618	2.58304	1.62431	0.96422	0.546699	0.339993	0.151477	-0.0342078	3.12644	1.92843	0.926876	0.48836	0.307328	0.247678	0.0882008	-0.0478886
	2.10667	3.69791	2.58384	1.62859	0.966256	0.545846	0.343217	0.152013	-0.0299363	3.12756	1.93392	0.926757	0.486573	0.310332	0.248789	0.0847531	-0.0441001
	2.11	3.70211	2.58537	1.62527	0.961062	0.546926	0.34097	0.148666	-0.0379729	3.12751	1.93371	0.929521	0.489467	0.309916	0.24928	0.0835186	-0.0442578
	2.11333	3.70043	2.58826	1.62934	0.965529	0.543485	0.345121	0.151871	-0.032567	3.12904	1.93254	0.931471	0.484787	0.303453	0.249324	0.0838622	-0.0421839
	2.11667	3.70123	2.59197	1.6255	0.967094	0.55209	0.3421	0.148063	-0.032517	3.13189	1.93496	0.932254	0.4913	0.303577	0.246087	0.0842581	-0.0410785
	2.12	3.70971	2.59109	1.63247	0.96593	0.548349	0.34579	0.148522	-0.0336036	3.13072	1.93866	0.929789	0.485909	0.306932	0.250876	0.0846254	-0.0459069
	2.12333	3.70531	2.59952	1.63104	0.967842	0.548242	0.348044	0.151428	-0.0332535	3.13306	1.93773	0.933041	0.489381	0.306342	0.247673	0.0905372	-0.0457028
	2.12667	3.70572	2.5934	1.63551	0.969283	0.551128	0.343724	0.148284	-0.0336579	3.13238	1.94352	0.931095	0.490089	0.308885	0.248711	0.0874623	-0.0441167
	2.13	3.70425	2.59894	1.63128	0.968191	0.54916	0.344994	0.150034	-0.0320036	3.13644	1.94162	0.933965	0.49035	0.304596	0.249742	0.0850754	-0.0448983
	2.13333	3.70882	2.59773	1.63301	0.968952	0.545266	0.343784	0.154506	-0.0327998	3.13422	1.94148	0.933739	0.488724	0.309249	0.246324	0.0829091	-0.0433593
	2.13667	3.71347	2.59399	1.63849	0.969374	0.549609	0.341821	0.152328	-0.0321781	3.14006	1.94327	0.933656	0.491544	0.307809	0.247522	0.088186	-0.0462206
	2.14	3.71071	2.59869	1.63317	0.968136	0.550489	0.343399	0.151984	-0.0355591	3.13826	1.94707	0.935365	0.488947	0.312409	0.247428	0.0831176	-0.0434843
	2.14333	3.71413	2.60103	1.63707	0.962723	0.545164	0.342618	0.152439	-0.0366409	3.14291	1.94381	0.93568	0.488788	0.308324	0.248541	0.0848353	-0.0438029
	2.14667	3.71613	2.59728	1.63447	0.968982	0.551815	0.349623	0.151998	-0.0328976	3.13985	1.94607	0.939489	0.490089	0.305976	0.24633	0.0859965	-0.0465789
	2.15	3.71885	2.60275	1.64068	0.968013	0.553978	0.347323	0.149146	-0.0307668	3.14011	1.95043	0.936441	0.489223	0.309414	0.24953	0.0873525	-0.0471646
	2.15333	3.71655	2.60696	1.6395	0.972912	0.549375	0.342999	0.153327	-0.0355654	3.14355	1.94878	0.936819	0.491955	0.307347	0.249438	0.086739	-0.0416434
	2.15667	3.72029	2.60494	1.64325	0.975177	0.545878	0.345184	0.153865	-0.0330237	3.14572	1.95473	0.940831	0.486731	0.307141	0.246984	0.0850906	-0.0466627
	2.16	3.7183	2.6063	1.63514	0.971077	0.551101	0.339929	0.153526	-0.0325797	3.14709	1.95078	0.938676	0.489885	0.307374	0.244833	0.0818411	-0.0469385
	2.16333	3.72175	2.60625	1.64354	0.971574	0.546072	0.344608	0.148497	-0.0334539	3.15055	1.95751	0.940925	0.487676	0.309332	0.248002	0.0865184	-0.0454336
	2.16667	3.72555	2.61413	1.64492	0.974615	0.548344	0.341941	0.155153	-0.0332452	3.14964	1.95264	0.941583	0.488792	0.307653	0.248957	0.0835117	-0.0443502
	2.17	3.72298	2.60864	1.64178	0.974851	0.553495	0.3474	0.154166	-0.0316939	3.14968	1.9586	0.938257	0.487436	0.308693	0.247627	0.0846363	-0.0467327
	2.17333	3.73091	2.61485	1.64467	0.968554	0.552348	0.342816	0.150069	-0.0315331	3.153	1.96081	0.939065	0.490033	0.312254	0.253526	0.0832785	-0.0448873
	2.17667	3.72898	2.61972	1.64408	0.973167	0.553998	0.343629	0.151172	-0.0337421	3.15514	1.95737	0.944519	0.492753	0.304366	0.244389	0.0839251	-0.0473416
	2.18	3.73116	2.61806	1.65087	0.972464	0.551867	0.344915	0.154948	-0.0324413	3.15688	1.96356	0.941089	0.491044	0.309014	0.246634	0.0861592	-0.0439026
	2.18333	3.72879	2.61578	1.64536	0.973761	0.549925	0.346277	0.151099	-0.0375115	3.15981	1.96264	0.93892	0.489088	0.305291	0.249577	0.0818828	-0.0429023
	2.18667	3.73154	2.62014	1.64975	0.974412	0.552065	0.342404	0.151961	-0.0353131	3.15785	1.96166	0.940535	0.489027	0.302301	0.248934	0.0880387	-0.0447603
	2.19	3.73362	2.61861	1.64843	0.973058	0.548745	0.34526	0.154409	-0.0349882	3.16309	1.96179	0.941152	0.491113	0.306726	0.248156	0.0837186	-0.0457164
	2.19333	3.73666	2.61755	1.64864	0.97344	0.549753	0.341506	0.155829	-0.036912	3.16238	1.96574	0.94355	0.492839	0.310549	0.251185	0.0798045	-0.0459845
	2.19667	3.73394	2.62213	1.64972	0.970943	0.553038	0.34613	0.150928	-0.0345709	3.16488	1.96845	0.946471	0.492963	0.305815	0.24712	0.0832892	-0.0502616
	2.2	3.74152	2.62303	1.6492	0.976899	0.549231	0.346208	0.155672	-0.0320258	3.16418	1.96764	0.941627	0.497022	0.305537	0.245153	0.0854519	-0.0469302
	2.20333	3.74121	2.62294	1.65308	0.974728	0.554231	0.343684	0.152956	-0.0344805	3.16527	1.96975	0.949573	0.494931	0.307281	0.245305	0.0856112	-0.0460073
	2.20667	3.73988	2.62662	1.6537	0.972562	0.551879	0.346875	0.150547	-0.0387517	3.16384	1.97229	0.944153	0.489445	0.306556	0.250626	0.0863839	-0.04742
	2.21	3.74456	2.63031	1.65266	0.978344	0.54999	0.347786	0.151693	-0.0336372	3.16949	1.97232	0.942443	0.489815	0.310114	0.245979	0.0827794	-0.0444133
	2.21333	3.74566	2.63014	1.65246	0.975454	0.546373	0.347017	0.153091	-0.0361174	3.17134	1.9698	0.9453	0.490202	0.304184	0.247513	0.0878097	-0.0463137
	2.21667	3.73942	2.63275	1.65748	0.978356	0.553106	0.349603	0.149835	-0.0361414	3.16813	1.97827	0.949807	0.494455	0.304697	0.248802	0.0858029	-0.0479674
	2.22	3.7447	2.63339	1.65856	0.980194	0.557054	0.34681	0.153939	-0.0353511	3.17278	1.97699	0.94931	0.497268	0.30833	0.246835	0.0835062	-0.0444504
	2.22333	3.74712	2.63499	1.65883	0.976417	0.548606	0.346343	0.153247	-0.0336644	3.18011	1.98075	0.950122	0.490553	0.304075	0.25015	0.0843804	-0.0447866
	2.22667	3.74368	2.63299	1.65814	0.974115	0.549828	0.342034	0.156198	-0.0342877	3.17851	1.97564	0.94822	0.487048	0.30632	0.252464	0.0859749	-0.0479071
	2.23	3.74754	2.63557	1.65756	0.97943	0.552146	0.34453	0.151211	-0.034341	3.17703	1.9798	0.948716	0.489341	0.305129	0.247407	0.0868393	-0.0460598
	2.23333	3.75188	2.63902	1.66249	0.97891	0.549494	0.346199	0.149152	-0.0361128	3.17735	1.97687	0.951535	0.491971	0.308555	0.253236	0.0855926	-0.0445556
	2.23667	3.75162	2.64024	1.66124	0.979098	0.551109	0.344633	0.150308	-0.0327036	3.17832	1.9833	0.944558	0.492167	0.305892	0.248561	0.0836489	-0.0467733
	2.24	3.75373	2.64315	1.66524	0.985075	0.552813	0.344889	0.149511	-0.0339775	3.18316	1.98152	0.946659	0.48856	0.308926	0.248672	0.0853941	-0.049596
	2.24333	3.75696	2.63801	1.66091	0.981087	0.553922	0.344742	0.150636	-0.0389935	3.18595	1.9876	0.953195	0.496568	0.30736	0.247432	0.0836284	-0.0490333
	2.24667	3.75919	2.64812	1.66374	0.984425	0.552088	0.348331	0.152726	-0.03769	3.18094	1.99208	0.953222	0.487675	0.308731	0.251822	0.0827834	-0.0457212
	2.25	3.75396	2.64352	1.66602	0.980479	0.550073	0.348335	0.156173	-0.0335838	3.18578	1.98361	0.952643	0.492506	0.307205	0.249059	0.0834904	-0.0454739
	2.25333	3.7613	2.6414	1.66725	0.982016	0.551866	0.349272	0.156493	-0.0345143	3.18404	1.98985	0.954244	0.494368	0.309245	0.249785	0.0829423	-0.0439476
	2.25667	3.76003	2.64653	1.66542	0.980143	0.553013	0.350487	0.152449	-0.0334045	3.1916	1.98645	0.950225	0.495178	0.309485	0.248426	0.0860849	-0.0496891
	2.26	3.76041	2.64704	1.66862	0.98208	0.553581	0.344436	0.150935	-0.035297	3.18803	1.98768	0.953947	0.497562	0.305516	0.249582	0.0852991	-0.0437456
	2.26333	3.76374	2.64593	1.66754	0.984224	0.555316	0.346821	0.154516	-0.0331764	3.18671	1.98843	0.953985	0.495939	0.305219	0.249007	0.0843955	-0.0468738
	2.26667	3.75964	2.65128	1.66877	0.987053	0.554863	0.344802	0.152434	-0.0346451	3.19617	1.9908	0.955493	0.493548	0.308499	0.249523	0.0872015	-0.0470266
	2.27	3.76233	2.65395	1.66637	0.982725	0.555608	0.348123	0.148157	-0.0363781	3.1923	1.99504	0.956999	0.491746	0.310011	0.249631	0.0858452	-0.0455593
	2.27333	3.76359	2.65162	1.67086	0.984498	0.550458	0.345857	0.15509	-0.037589	3.19636	1.98975	0.954647	0.495004	0.305855	0.247563	0.083696	-0.0468612
	2.27667	3.76507	2.65465	1.66781	0.986281	0.556317	0.348111	0.14953	-0.035638	3.19183	1.99995	0.955344	0.494434	0.30942	0.247686	0.0859397	-0.0500095
	2.28	3.76838	2.65296	1.66952	0.983061	0.554455	0.34693	0.152434	-0.0330674	3.19385	1.99764	0.955077	0.494533	0.308654	0.250911	0.0827827	-0.0444337
	2.28333	3.76691	2.65752	1.6749	0.986906	0.553561	0.342219	0.150106	-0.0365589	3.19624	1.99964	0.953005	0.494169	0.309204	0.248212	0.0838754	-0.049016
	2.28667	3.76789	2.6546	1.67321	0.987265	0.556197	0.350028	0.154521	-0.0311727	3.19906	2.00049	0.959484	0.494821	0.312861	0.247808	0.0881976	-0.0491017
	2.29	3.77218	2.65664	1.67447	0.984179	0.555098	0.343122	0.153838	-0.0359111	3.20225	2.00102	0.959681	0.498392	0.307307	0.245377	0.0812247	-0.051588
	2.29333	3.77148	2.66421	1.67115	0.984157	0.555935	0.351377	0.152042	-0.038545	3.20644	2.0023	0.95858	0.495677	0.308962	0.246314	0.0900924	-0.0462952
	2.29667	3.7739	2.66307	1.6751	0.989538	0.554597	0.343335	0.151082	-0.0347478	3.20587	2.0049	0.958961	0.497953	0.311105	0.250077	0.0858152	-0.0443015
	2.3	3.77515	2.66367	1.67501	0.985173	0.554843	0.348497	0.156812	-0.0357382	3.20579	2.0023	0.959928	0.493106	0.308476	0.248837	0.0915558	-0.0444416
	2.30333	3.77302	2.66419	1.6773	0.988661	0.557008	0.349841	0.152736	-0.0380936	3.20414	2.00525	0.958674	0.498093	0.314669	0.247338	0.0907007	-0.0486532
	2.30667	3.77289	2.66988	1.67504	0.989552	0.55377	0.345824	0.153501	-0.0354282	3.20479	2.00698	0.95996	0.494101	0.31039	0.250172	0.0846409	-0.0468395
	2.31	3.77849	2.66826	1.68075	0.990283	0.552477	0.350545	0.148697	-0.0383936	3.21277	2.00992	0.961652	0.497483	0.306851	0.247584	0.0869703	-0.0495855
	2.31333	3.78533	2.66613	1.67719	0.990475	0.554767	0.34993	0.151146	-0.0356345	3.21204	2.00274	0.958218	0.496469	0.308009	0.252966	0.0840999	-0.0481968
	2.31667	3.78162	2.66849	1.68073	0.995244	0.556689	0.346253	0.152959	-0.0356227	3.21008	2.0102	0.965966	0.496526	0.308311	0.24875	0.0841511	-0.0500819
	2.32	3.77716	2.669	1.68277	0.986268	0.552331	0.351207	0.1543	-0.0347812	3.20951	2.00962	0.960674	0.49803	0.310664	0.24915	0.0838148	-0.0458885
	2.32333	3.78284	2.67087	1.68376	0.990811	0.553357	0.349443	0.158999	-0.0331241	3.21653	2.01151	0.965708	0.492217	0.311109	0.250613	0.0824283	-0.046208
	2.32667	3.78432	2.66891	1.68631	0.988088	0.552208	0.349521	0.151586	-0.0378599	3.2155	2.01209	0.966306	0.496558	0.31284	0.248532	0.0836549	-0.0503126
	2.33	3.78162	2.67088	1.68478	0.994824	0.558445	0.350591	0.155488	-0.0357269	3.21643	2.01678	0.966088	0.497009	0.308744	0.24926	0.084931	-0.047473
	2.33333	3.78789	2.67911	1.68799	0.995184	0.554535	0.342025	0.153364	-0.0380052	3.22223	2.02075	0.965837	0.498287	0.306881	0.253581	0.0861926	-0.0484553
	2.33667	3.78645	2.67602	1.68362	0.988629	0.561065	0.346865	0.15661	-0.0327526	3.22069	2.01945	0.968917	0.501738	0.309336	0.247183	0.0823067	-0.0448043
	2.34	3.79224	2.68072	1.68624	0.993357	0.559141	0.347685	0.153546	-0.0374447	3.22204	2.01964	0.969138	0.495384	0.305757	0.248306	0.0847925	-0.0457885
	2.34333	3.78656	2.67874	1.69064	0.994398	0.555869	0.347712	0.157287	-0.0406436	3.22488	2.02248	0.964664	0.494505	0.307229	0.249654	0.0845585	-0.0470512
	2.34667	3.78927	2.68075	1.69	0.99668	0.558091	0.349164	0.149335	-0.0363954	3.22547	2.02229	0.965326	0.49496	0.310002	0.251154	0.0867721	-0.0435449
	2.35	3.79209	2.68135	1.68998	0.995472	0.559149	0.350335	0.153039	-0.0370529	3.22461	2.02208	0.967632	0.499127	0.311729	0.248841	0.0851841	-0.047886
	2.35333	3.79788	2.68345	1.69161	0.995727	0.557747	0.345275	0.153435	-0.0387658	3.22445	2.02375	0.968443	0.498093	0.312452	0.249691	0.0853021	-0.0511175
	2.35667	3.79405	2.68471	1.69418	0.996197	0.558964	0.348456	0.154069	-0.0359884	3.22616	2.02772	0.968182	0.493701	0.309126	0.245376	0.0863627	-0.0492034
	2.36	3.79858	2.68674	1.69093	0.995279	0.560353	0.350148	0.15786	-0.0337267	3.22887	2.02666	0.969717	0.496925	0.308117	0.249573	0.0826065	-0.050887
	2.36333	3.79746	2.68793	1.69293	0.996836	0.561197	0.348369	0.158108	-0.0340872	3.23364	2.03194	0.968033	0.49677	0.307605	0.248487	0.0810047	-0.0507312
	2.36667	3.80352	2.68767	1.69379	0.996977	0.559895	0.34439	0.155001	-0.0358687	3.23618	2.02589	0.969183	0.499311	0.307429	0.249068	0.0828761	-0.0443264
	2.37	3.8061	2.69104	1.69397	0.994677	0.55954	0.348167	0.153844	-0.0368071	3.23076	2.03057	0.973459	0.498644	0.308388	0.249228	0.0828303	-0.0474516
	2.37333	3.8015	2.69145	1.69184	0.9956	0.559495	0.350346	0.152487	-0.0370448	3.23324	2.02797	0.966396	0.497938	0.306244	0.24872	0.0876906	-0.0494687
	2.37667	3.8028	2.69443	1.69307	1.00286	0.560175	0.346707	0.154603	-0.0364592	3.23353	2.03088	0.974019	0.4962	0.308745	0.249082	0.0837811	-0.0498069
	2.38	3.80229	2.68842	1.6945	0.997976	0.562738	0.349498	0.151272	-0.0398555	3.24089	2.03524	0.972594	0.503762	0.313014	0.249539	0.0862031	-0.0439827
	2.38333	3.81085	2.69431	1.69779	0.99776	0.557485	0.348621	0.153818	-0.0414793	3.23808	2.03873	0.973228	0.498193	0.308949	0.249433	0.0828996	-0.0482511
	2.38667	3.80315	2.69247	1.69543	1.00359	0.561472	0.347085	0.155079	-0.0411075	3.2408	2.03606	0.973524	0.49782	0.307803	0.249454	0.0873109	-0.0530831
	2.39	3.81017	2.69694	1.70072	1.00129	0.561547	0.346756	0.150884	-0.0379449	3.23726	2.04063	0.976631	0.496086	0.310127	0.249066	0.0861465	-0.0451274
	2.39333	3.81057	2.69821	1.69806	1.00025	0.564518	0.347574	0.154008	-0.0366884	3.2409	2.03673	0.974771	0.495255	0.307277	0.253947	0.0856365	-0.0480018
	2.39667	3.80687	2.69615	1.69868	0.999067	0.554034	0.349161	0.155883	-0.0393484	3.2466	2.04128	0.974535	0.49758	0.311543	0.249285	0.0876157	-0.0472978
	2.4	3.81041	2.70603	1.70549	0.996763	0.558058	0.351899	0.155385	-0.0382595	3.24095	2.03782	0.975453	0.499185	0.310155	0.249528	0.0871267	-0.0496385
	2.40333	3.81174	2.70163	1.70058	0.99881	0.560361	0.351257	0.152705	-0.0385392	3.24706	2.03996	0.974544	0.499335	0.30653	0.24765	0.0854859	-0.0497689
	2.40667	3.80993	2.69966	1.70331	0.9986	0.562412	0.353552	0.153065	-0.0373967	3.24739	2.04506	0.975892	0.497797	0.310229	0.249675	0.0872929	-0.0479684
	2.41	3.81868	2.70831	1.70461	1.00528	0.55917	0.346527	0.155049	-0.0358465	3.24544	2.04564	0.972924	0.498096	0.307283	0.247827	0.0899933	-0.0482206
	2.41333	3.81015	2.70658	1.70422	1.0003	0.557375	0.347765	0.15425	-0.0342732	3.24975	2.0499	0.980456	0.49712	0.307177	0.248673	0.085695	-0.043771
	2.41667	3.819	2.70865	1.70374	1.00368	0.561916	0.35019	0.157802	-0.0412171	3.24881	2.04826	0.979319	0.50021	0.308154	0.248737	0.0855198	-0.048556
	2.42	3.81581	2.71075	1.70778	1.00355	0.561139	0.353259	0.158732	-0.0383115	3.24875	2.04835	0.977863	0.496132	0.305009	0.249633	0.0879085	-0.0518611
	2.42333	3.82116	2.70908	1.70674	1.00306	0.562301	0.353814	0.157425	-0.0406751	3.25385	2.05169	0.981368	0.502821	0.309289	0.247819	0.0846494	-0.0477795
	2.42667	3.81956	2.70748	1.70745	1.00204	0.561728	0.348436	0.152463	-0.0379827	3.25118	2.051	0.977531	0.500535	0.307056	0.247055	0.0847884	-0.0476471
	2.43	3.82116	2.70813	1.70748	1.00873	0.562221	0.352655	0.155252	-0.0344911	3.25468	2.05597	0.978077	0.501033	0.30845	0.250764	0.0876311	-0.052669
	2.43333	3.82443	2.71078	1.71055	1.00689	0.561049	0.347783	0.157503	-0.0393676	3.25541	2.05432	0.982585	0.493783	0.312489	0.253666	0.0848857	-0.0468746
	2.43667	3.81863	2.71662	1.7134	1.00226	0.561034	0.350052	0.151666	-0.040302	3.25424	2.05444	0.980939	0.500085	0.30835	0.249407	0.0851201	-0.0522999
	2.44	3.8273	2.7095	1.71362	1.00463	0.561597	0.345097	0.153833	-0.0328393	3.26075	2.05831	0.981534	0.502785	0.308263	0.252423	0.0883526	-0.0484208
	2.44333	3.82927	2.71542	1.71297	1.00402	0.564101	0.349147	0.154157	-0.0381736	3.26439	2.05594	0.980247	0.50492	0.309791	0.248038	0.0844954	-0.0521253
	2.44667	3.82655	2.71865	1.71142	1.00353	0.563677	0.34956	0.158242	-0.0380292	3.2632	2.0589	0.979434	0.497501	0.308165	0.251899	0.0840665	-0.0493892
	2.45	3.82546	2.71729	1.71781	1.00167	0.561896	0.348542	0.154448	-0.0367019	3.26301	2.05899	0.981772	0.498129	0.311586	0.25212	0.0870325	-0.0493541
	2.45333	3.82851	2.71865	1.71693	1.00414	0.561413	0.349264	0.15303	-0.0395109	3.26722	2.06145	0.980905	0.501649	0.308916	0.246854	0.0854745	-0.0511729
	2.45667	3.82915	2.72025	1.71575	1.00566	0.564366	0.348064	0.157402	-0.0385501	3.26291	2.0598	0.984038	0.502728	0.311097	0.250431	0.0879294	-0.0520538
	2.46	3.83008	2.72453	1.71528	1.00618	0.557904	0.346851	0.154928	-0.0395049	3.26676	2.06132	0.98988	0.499639	0.309172	0.246821	0.082973	-0.0510055
	2.46333	3.83162	2.72289	1.7179	1.00982	0.564332	0.344632	0.156347	-0.0365666	3.26526	2.06457	0.982175	0.497733	0.312266	0.249151	0.0820046	-0.0494024
	2.46667	3.8279	2.72305	1.72171	1.00218	0.561603	0.352897	0.152998	-0.0393168	3.2681	2.06969	0.984269	0.502125	0.309934	0.24775	0.0828097	-0.0538555
	2.47	3.83632	2.72449	1.71898	1.00528	0.563315	0.350582	0.157928	-0.0378853	3.2658	2.06095	0.98492	0.498329	0.305062	0.249553	0.0833682	-0.0514899
	2.47333	3.83601	2.72747	1.71999	1.00651	0.563792	0.348247	0.152149	-0.036358	3.2733	2.07049	0.984535	0.502724	0.310192	0.249278	0.0869705	-0.051954
	2.47667	3.83549	2.72646	1.71761	1.00883	0.562545	0.350475	0.153105	-0.0418969	3.27262	2.07011	0.990812	0.502008	0.313522	0.249694	0.0895487	-0.0515237
	2.48	3.8396	2.72886	1.7228	1.00693	0.565259	0.349363	0.15336	-0.0443132	3.27026	2.07184	0.986145	0.499727	0.307069	0.248871	0.0891244	-0.0566183
	2.48333	3.83877	2.73148	1.72081	1.00817	0.56444	0.347791	0.156587	-0.0371204	3.27579	2.0676	0.988519	0.503186	0.308211	0.248808	0.0877871	-0.0509996
	2.48667	3.84064	2.73308	1.71964	1.00967	0.564335	0.352225	0.155086	-0.0429932	3.27562	2.07234	0.990208	0.506014	0.309791	0.247863	0.0843266	-0.0509832
	2.49	3.84272	2.73244	1.72561	1.00923	0.563348	0.347347	0.154191	-0.0411173	3.27655	2.06975	0.988436	0.500221	0.308218	0.249286	0.0843618	-0.0506743
	2.49333	3.8422	2.73251	1.72688	1.01635	0.566962	0.346303	0.155891	-0.0424217	3.27412	2.07192	0.990409	0.50132	0.310806	0.253661	0.0876926	-0.0486322
	2.49667	3.84102	2.73637	1.72412	1.01371	0.563085	0.352306	0.157563	-0.0353685	3.28175	2.07292	0.990567	0.504083	0.307458	0.250367	0.0877616	-0.0498501
	2.5	3.8396	2.73501	1.72874	1.01307	0.564608	0.356577	0.155643	-0.0396938	3.28348	2.07232	0.991588	0.497735	0.306415	0.251091	0.0866092	-0.0512159
	2.50333	3.84628	2.73793	1.729	1.01348	0.56627	0.349985	0.155298	-0.0414523	3.28271	2.08053	0.992883	0.504951	0.31253	0.251102	0.0874188	-0.0501314
	2.50667	3.84561	2.74316	1.72779	1.00981	0.565404	0.348483	0.154941	-0.0403377	3.28599	2.08135	0.992732	0.504711	0.312528	0.249491	0.0874325	-0.0536249
	2.51	3.85079	2.74253	1.72813	1.01211	0.56494	0.351689	0.156148	-0.0392535	3.28667	2.08359	0.992088	0.503816	0.313394	0.25192	0.0824565	-0.0514713
	2.51333	3.84975	2.74246	1.73101	1.01187	0.566603	0.350712	0.156806	-0.0367824	3.28583	2.0855	0.995247	0.504229	0.308168	0.252167	0.0899504	-0.0503238
	2.51667	3.85338	2.746	1.7306	1.01182	0.565831	0.351358	0.155681	-0.037906	3.28494	2.08796	0.993835	0.502071	0.310155	0.245702	0.0814663	-0.0540566
	2.52	3.84754	2.74753	1.73191	1.01657	0.563857	0.35016	0.155011	-0.0454033	3.28524	2.084	0.993309	0.503819	0.308506	0.253748	0.0824743	-0.0510691
	2.52333	3.85449	2.7483	1.73264	1.01392	0.566461	0.349592	0.159521	-0.0403433	3.28713	2.08598	0.992174	0.50375	0.308036	0.249966	0.0855363	-0.051296
	2.52667	3.85359	2.74692	1.73101	1.01451	0.565351	0.350455	0.15654	-0.0393726	3.29141	2.08509	0.997454	0.504319	0.309345	0.253643	0.0875666	-0.0493437
	2.53	3.85548	2.74527	1.73157	1.01844	0.568344	0.353536	0.154	-0.0467591	3.28929	2.08757	0.993677	0.503255	0.307906	0.253018	0.0871451	-0.0514273
	2.53333	3.85646	2.74753	1.73535	1.00938	0.566866	0.354468	0.152697	-0.0395719	3.29097	2.09158	0.995394	0.49913	0.309125	0.248534	0.0859874	-0.0508095
	2.53667	3.85737	2.7485	1.73302	1.01938	0.565365	0.35261	0.158206	-0.039142	3.29813	2.08689	0.995059	0.507363	0.313977	0.249591	0.0864315	-0.0542711
	2.54	3.85499	2.75338	1.73961	1.01384	0.563245	0.34651	0.157653	-0.0402399	3.29583	2.09569	0.996427	0.503747	0.309081	0.24991	0.0851202	-0.0490504
	2.54333	3.85826	2.75412	1.74007	1.01159	0.569981	0.35078	0.152624	-0.0397831	3.29798	2.09629	0.996754	0.502384	0.309516	0.247624	0.0836961	-0.0539364
	2.54667	3.86384	2.74928	1.74146	1.01945	0.566233	0.347731	0.155831	-0.0401022	3.29808	2.09359	0.995385	0.502393	0.313152	0.250841	0.085765	-0.0513936
	2.55	3.86251	2.75669	1.74023	1.01732	0.563453	0.35566	0.156427	-0.0404686	3.29586	2.09191	0.995344	0.501745	0.314039	0.250416	0.0843017	-0.0513091
	2.55333	3.86238	2.75581	1.73953	1.01404	0.564987	0.349641	0.154747	-0.0380725	3.29521	2.09996	0.999596	0.501788	0.30837	0.250551	0.0882463	-0.052308
	2.55667	3.86265	2.75875	1.73973	1.0201	0.566441	0.351652	0.15388	-0.044651	3.30396	2.09719	1.00023	0.503979	0.311451	0.248188	0.0870863	-0.0545646
	2.56	3.86684	2.75717	1.74192	1.01673	0.565025	0.354853	0.153693	-0.0413855	3.29789	2.09494	0.999787	0.505022	0.309926	0.249567	0.0897083	-0.0549205
	2.56333	3.8669	2.76225	1.74143	1.02054	0.566265	0.354112	0.156362	-0.0441635	3.29949	2.10202	0.997978	0.502455	0.308697	0.249141	0.0827888	-0.0509053
	2.56667	3.86667	2.75915	1.74163	1.02423	0.567884	0.351893	0.157182	-0.0426601	3.30291	2.1023	1.00025	0.504017	0.306397	0.251316	0.0853971	-0.0538347
	2.57	3.86596	2.76059	1.7396	1.01939	0.570722	0.349757	0.158143	-0.0401385	3.30513	2.10168	0.998262	0.506488	0.313965	0.250159	0.0855949	-0.0475363
	2.57333	3.87204	2.76447	1.74076	1.0246	0.566432	0.351238	0.158014	-0.0443067	3.30764	2.10405	0.998745	0.505196	0.311354	0.250717	0.0842123	-0.050838
	2.57667	3.87155	2.7591	1.74287	1.02442	0.567593	0.350209	0.155945	-0.036994	3.30649	2.1049	1.00237	0.506309	0.317361	0.249176	0.0875727	-0.0558491
	2.58	3.87318	2.76329	1.74637	1.02283	0.567833	0.355428	0.159029	-0.0391215	3.30767	2.10602	1.0056	0.507565	0.313448	0.249519	0.0864684	-0.0509299
	2.58333	3.87267	2.76649	1.74401	1.02519	0.567126	0.350597	0.152995	-0.0388797	3.31377	2.10985	1.00017	0.508956	0.310515	0.247308	0.084365	-0.0528568
	2.58667	3.8729	2.76366	1.74472	1.02193	0.564099	0.350655	0.155314	-0.0424134	3.31398	2.10869	1.00245	0.504969	0.309839	0.246187	0.0866867	-0.0511363
	2.59	3.8725	2.76467	1.74786	1.02044	0.567637	0.349288	0.158518	-0.038535	3.30844	2.11261	1.00634	0.506457	0.312004	0.251088	0.0844226	-0.0519809
	2.59333	3.87393	2.76854	1.74458	1.02566	0.565889	0.352894	0.158311	-0.040687	3.31303	2.11111	1.0057	0.505106	0.310805	0.248275	0.0880597	-0.0514024
	2.59667	3.87191	2.76792	1.74597	1.02624	0.56964	0.354791	0.15394	-0.0373795	3.31514	2.11172	1.00425	0.50638	0.308874	0.249067	0.0845405	-0.0528166
	2.6	3.87935	2.77482	1.74943	1.02297	0.567616	0.355817	0.159255	-0.0419576	3.31337	2.10879	1.00656	0.50613	0.30987	0.250168	0.0873375	-0.0546936
	2.60333	3.8773	2.76986	1.74754	1.02533	0.566976	0.356048	0.160312	-0.0438921	3.31502	2.11135	1.00735	0.504425	0.311437	0.249723	0.0815679	-0.048643
	2.60667	3.88594	2.77229	1.74933	1.0249	0.56991	0.351132	0.154071	-0.041648	3.3159	2.11116	1.00728	0.507516	0.312168	0.249014	0.0883261	-0.0538747
	2.61	3.87794	2.77535	1.75087	1.02274	0.570587	0.349477	0.156589	-0.0385014	3.31566	2.11311	1.00913	0.503159	0.310016	0.248373	0.0859788	-0.0528074
	2.61333	3.87897	2.77752	1.75538	1.02588	0.565961	0.351841	0.157654	-0.0437021	3.32011	2.11454	1.00388	0.505186	0.310114	0.247915	0.0848521	-0.0535208
	2.61667	3.88324	2.77239	1.75668	1.02769	0.566846	0.353371	0.153168	-0.0471676	3.32175	2.11726	1.00702	0.506809	0.310363	0.245142	0.0864763	-0.053206
	2.62	3.88224	2.77353	1.75732	1.0236	0.565019	0.351754	0.159807	-0.0426522	3.32113	2.11715	1.00967	0.508939	0.308445	0.250624	0.0895054	-0.0514297
	2.62333	3.88461	2.77855	1.76069	1.02816	0.569286	0.354015	0.157541	-0.0457174	3.32248	2.11757	1.01112	0.506528	0.312098	0.250471	0.085953	-0.0528469
	2.62667	3.8843	2.78037	1.75584	1.02547	0.568277	0.351335	0.159667	-0.0426279	3.32259	2.12103	1.01088	0.503975	0.309784	0.250697	0.0854773	-0.053018
	2.63	3.88447	2.78292	1.75863	1.02409	0.568764	0.352202	0.156386	-0.0409327	3.3241	2.11501	1.01186	0.510734	0.309543	0.252677	0.0888834	-0.0527825
	2.63333	3.88517	2.78325	1.75899	1.03073	0.567372	0.350197	0.150856	-0.0399855	3.32386	2.1223	1.01197	0.50854	0.307404	0.253395	0.0866174	-0.0543731
	2.63667	3.88728	2.7849	1.76042	1.02336	0.570907	0.346507	0.156179	-0.0415223	3.33322	2.12241	1.00865	0.506592	0.314062	0.249994	0.085106	-0.0540704
	2.64	3.89248	2.78235	1.75857	1.02919	0.572213	0.351247	0.157091	-0.0398542	3.32995	2.12828	1.01293	0.509746	0.310282	0.250301	0.0875376	-0.0519425
	2.64333	3.89323	2.78472	1.75842	1.02835	0.572806	0.353671	0.155182	-0.0411115	3.33014	2.12394	1.01386	0.508427	0.311842	0.250676	0.0851973	-0.0521578
	2.64667	3.89148	2.78888	1.76002	1.02774	0.56842	0.355735	0.158345	-0.0426544	3.32952	2.12691	1.00867	0.506397	0.308452	0.249428	0.0843786	-0.0511095
	2.65	3.89019	2.78644	1.76245	1.03036	0.568836	0.354492	0.153979	-0.0420355	3.33232	2.12636	1.0137	0.511715	0.311879	0.250787	0.088885	-0.0544756
	2.65333	3.89677	2.7917	1.76469	1.02961	0.568354	0.351803	0.160673	-0.0441536	3.33565	2.131	1.01132	0.506299	0.307546	0.249575	0.0879081	-0.0589488
	2.65667	3.89718	2.78978	1.76003	1.03014	0.57043	0.353219	0.158886	-0.0415023	3.33722	2.13154	1.01904	0.505374	0.310248	0.251691	0.0860226	-0.0532057
	2.66	3.89669	2.7948	1.76554	1.03167	0.572047	0.35003	0.159111	-0.0415662	3.33366	2.13576	1.0183	0.507984	0.310713	0.251018	0.0844494	-0.0570528
	2.66333	3.89667	2.79338	1.76075	1.0296	0.576923	0.356013	0.158886	-0.0395479	3.33574	2.13639	1.01694	0.508734	0.312484	0.249832	0.0840286	-0.0534437
	2.66667	3.89479	2.79394	1.76505	1.03032	0.5703	0.35327	0.155283	-0.0459573	3.33315	2.13801	1.0118	0.505878	0.3129	0.250232	0.0871345	-0.0570211
	2.67	3.89646	2.79166	1.76554	1.03048	0.572441	0.352939	0.159071	-0.0429901	3.33544	2.13654	1.01803	0.507761	0.314142	0.249723	0.0834044	-0.0548797
	2.67333	3.89856	2.79595	1.76638	1.03317	0.57128	0.354334	0.156534	-0.041119	3.33735	2.14111	1.0174	0.508654	0.311425	0.251694	0.0833036	-0.0535123
	2.67667	3.89864	2.7976	1.76647	1.03027	0.568602	0.359613	0.155054	-0.0380058	3.34167	2.13763	1.01449	0.505086	0.313648	0.24966	0.0847456	-0.0535501
	2.68	3.89906	2.79892	1.7683	1.03441	0.569784	0.356795	0.156259	-0.0404903	3.33918	2.13714	1.02034	0.508198	0.309345	0.251938	0.0886149	-0.0583753
	2.68333	3.90546	2.80063	1.77022	1.02841	0.575708	0.35284	0.156605	-0.0438417	3.34178	2.1409	1.01219	0.506178	0.308332	0.250602	0.0866164	-0.052076
	2.68667	3.9041	2.79907	1.76872	1.03216	0.57061	0.355813	0.15724	-0.0454768	3.34223	2.13837	1.01747	0.511128	0.309347	0.25147	0.0787109	-0.0555497
	2.69	3.90551	2.79998	1.76487	1.0409	0.573152	0.351804	0.157595	-0.0441743	3.34413	2.14093	1.02179	0.511584	0.310964	0.253811	0.0843055	-0.0539255
	2.69333	3.90156	2.80113	1.77038	1.03418	0.574236	0.356063	0.154724	-0.0436235	3.35131	2.14014	1.01784	0.511108	0.31372	0.252727	0.0885222	-0.0540655
	2.69667	3.91135	2.80335	1.76927	1.03758	0.568854	0.354658	0.156096	-0.0414345	3.34762	2.14784	1.01821	0.505422	0.312709	0.246241	0.0861374	-0.0543737
	2.7	3.90695	2.80521	1.77385	1.03261	0.573633	0.351857	0.156972	-0.0429077	3.34848	2.14237	1.02102	0.505167	0.31121	0.251202	0.0844097	-0.0543493
	2.70333	3.9121	2.81007	1.77594	1.03922	0.570474	0.35623	0.162609	-0.0428928	3.35042	2.14554	1.01984	0.509634	0.309329	0.25005	0.0900205	-0.0520806
	2.70667	3.91286	2.80702	1.77506	1.0321	0.56928	0.353866	0.159519	-0.0390604	3.35105	2.14715	1.02287	0.508324	0.31284	0.253197	0.0851183	-0.0551564
	2.71	3.91257	2.80571	1.7732	1.03696	0.574879	0.352793	0.160123	-0.0429551	3.35612	2.14858	1.01932	0.511137	0.309722	0.249761	0.0859461	-0.0553978
	2.71333	3.9123	2.8052	1.77558	1.03446	0.574477	0.35054	0.155262	-0.0451416	3.35352	2.14966	1.0219	0.508034	0.312157	0.250178	0.0844326	-0.0562887
	2.71667	3.9126	2.8079	1.77858	1.03961	0.570251	0.355639	0.160935	-0.0394389	3.35445	2.14871	1.02193	0.50932	0.314004	0.250753	0.0855248	-0.0552488
	2.72	3.9106	2.81516	1.77509	1.03428	0.571848	0.352624	0.153132	-0.0456471	3.35046	2.15058	1.02357	0.510018	0.310422	0.246258	0.0830293	-0.0562156
	2.72333	3.91478	2.81016	1.77906	1.04498	0.573794	0.349755	0.158943	-0.0459925	3.35579	2.15117	1.02366	0.506273	0.314518	0.250131	0.0869731	-0.0545771
	2.72667	3.91559	2.81619	1.77893	1.03936	0.573543	0.350822	0.158667	-0.0445368	3.35431	2.15626	1.02623	0.508993	0.311505	0.249273	0.089448	-0.0545687
	2.73	3.91902	2.81673	1.77887	1.04102	0.570689	0.353877	0.15881	-0.0440132	3.35674	2.15492	1.02256	0.508241	0.309647	0.247536	0.085678	-0.0553828
	2.73333	3.91683	2.81049	1.78387	1.03717	0.575568	0.352475	0.156444	-0.043959	3.35876	2.1479	1.0252	0.511546	0.311858	0.247541	0.0852754	-0.0578943
	2.73667	3.91189	2.81697	1.78035	1.03926	0.57179	0.352097	0.158424	-0.0410003	3.35938	2.15339	1.02516	0.510546	0.315051	0.251891	0.0894729	-0.0527117
	2.74	3.92353	2.81898	1.78538	1.03969	0.575516	0.354118	0.155863	-0.0449237	3.36459	2.16071	1.02655	0.509893	0.311647	0.251569	0.0857118	-0.0581687
	2.74333	3.92093	2.81747	1.78414	1.04223	0.577215	0.355585	0.158248	-0.0412961	3.36329	2.16442	1.02772	0.50871	0.309024	0.248629	0.0837208	-0.0563897
	2.74667	3.9206	2.82221	1.78549	1.03938	0.574388	0.35873	0.157115	-0.043088	3.36489	2.16476	1.02483	0.510596	0.312009	0.249557	0.0868463	-0.0514851
	2.75	3.9239	2.81986	1.78101	1.04056	0.575793	0.350486	0.158214	-0.038843	3.36362	2.16529	1.02426	0.51168	0.309251	0.254166	0.0852678	-0.0515822
	2.75333	3.92557	2.81944	1.78691	1.04181	0.572964	0.351508	0.162268	-0.0415211	3.36806	2.16491	1.02683	0.507308	0.313437	0.249953	0.0842415	-0.0536167
	2.75667	3.92444	2.82245	1.78751	1.04168	0.576058	0.353277	0.162159	-0.0424063	3.36889	2.15887	1.02663	0.510904	0.312861	0.253216	0.0903811	-0.0570992
	2.76	3.92624	2.82186	1.78326	1.04042	0.578965	0.355995	0.157265	-0.0433923	3.36436	2.16235	1.02946	0.515742	0.312966	0.251225	0.0862729	-0.0534372
	2.76333	3.92207	2.82316	1.78697	1.0424	0.572165	0.351777	0.160665	-0.0435914	3.37241	2.16698	1.02636	0.512076	0.315988	0.253363	0.0875862	-0.0534941
	2.76667	3.9282	2.82666	1.78746	1.04854	0.576649	0.353876	0.160444	-0.0428527	3.36733	2.16419	1.03268	0.511937	0.31288	0.248815	0.0889016	-0.0568444
	2.77	3.92977	2.82489	1.78583	1.03953	0.578297	0.356858	0.155171	-0.0432568	3.37165	2.16922	1.03202	0.512276	0.314144	0.247202	0.0868293	-0.0559653
	2.77333	3.92595	2.82765	1.78917	1.04042	0.578307	0.353467	0.154768	-0.0435962	3.37052	2.16368	1.03166	0.504689	0.309742	0.250568	0.0891467	-0.0537203
	2.77667	3.92444	2.83037	1.79309	1.04443	0.574212	0.355292	0.159076	-0.0371857	3.37453	2.16554	1.02889	0.510086	0.310636	0.248268	0.084013	-0.0577302
	2.78	3.93161	2.83202	1.79344	1.04201	0.57321	0.352833	0.153119	-0.0448408	3.37172	2.16854	1.02795	0.511971	0.312211	0.247632	0.0856757	-0.0554723
	2.78333	3.93453	2.82927	1.79273	1.04119	0.578882	0.35514	0.157781	-0.044845	3.37497	2.17286	1.03067	0.510046	0.31718	0.251061	0.0811434	-0.0585094
	2.78667	3.93003	2.83197	1.79387	1.04619	0.576491	0.352225	0.160608	-0.043288	3.37425	2.17445	1.03456	0.509508	0.30973	0.249794	0.0902161	-0.0550194
	2.79	3.93126	2.83085	1.79419	1.04574	0.573288	0.353415	0.153098	-0.0418516	3.37099	2.17448	1.03411	0.514647	0.312936	0.247298	0.0878754	-0.0535673
	2.79333	3.9337	2.83325	1.78953	1.04322	0.573845	0.353298	0.160818	-0.0463952	3.37372	2.17649	1.03326	0.510169	0.310431	0.248693	0.087603	-0.0556092
	2.79667	3.93789	2.83192	1.795	1.04542	0.574703	0.354871	0.157438	-0.0446314	3.37668	2.17586	1.0327	0.510141	0.311779	0.251888	0.082634	-0.0554453
	2.8	3.9396	2.83468	1.79608	1.04765	0.575727	0.357804	0.158868	-0.0425865	3.37647	2.17798	1.03322	0.511757	0.310383	0.251919	0.0868717	-0.0578232
	2.80333	3.94119	2.83544	1.79204	1.04274	0.575738	0.356305	0.156072	-0.0454073	3.38186	2.18015	1.03338	0.512227	0.312961	0.252571	0.0850769	-0.0550985
	2.80667	3.93933	2.83294	1.79952	1.05119	0.581826	0.356141	0.159055	-0.0457179	3.38107	2.17477	1.03184	0.510507	0.314497	0.24725	0.0875926	-0.0555562
	2.81	3.94122	2.8367	1.79889	1.04432	0.57948	0.352096	0.159614	-0.0446371	3.37927	2.18006	1.03743	0.515605	0.314313	0.247377	0.0842718	-0.0569632
	2.81333	3.9413	2.84226	1.7942	1.04849	0.573642	0.358152	0.155792	-0.0472304	3.38687	2.17809	1.03435	0.510988	0.315213	0.250105	0.0904019	-0.0542376
	2.81667	3.94453	2.84195	1.79896	1.04858	0.578299	0.357832	0.157149	-0.0488281	3.38758	2.18352	1.03991	0.512964	0.307847	0.253224	0.0841023	-0.0520934
	2.82	3.93955	2.84288	1.79903	1.04915	0.57916	0.35416	0.158526	-0.0471667	3.38558	2.18511	1.03458	0.515444	0.314249	0.250129	0.0873121	-0.0536759
	2.82333	3.93931	2.84599	1.80222	1.0469	0.580995	0.355373	0.158986	-0.0441862	3.38646	2.1847	1.03593	0.512585	0.311234	0.251904	0.0862877	-0.0569793
	2.82667	3.94528	2.84701	1.80026	1.04729	0.577124	0.352935	0.158495	-0.0444457	3.39044	2.18119	1.0374	0.512253	0.312553	0.25064	0.0822453	-0.056289
	2.83	3.94384	2.84604	1.80257	1.04859	0.578103	0.355702	0.163482	-0.0439085	3.38791	2.17836	1.03938	0.5132	0.313288	0.247065	0.083754	-0.0581835
	2.83333	3.94741	2.84461	1.80092	1.05086	0.580505	0.356666	0.157999	-0.0430945	3.39318	2.187	1.0389	0.512368	0.309574	0.253974	0.0881258	-0.055201
	2.83667	3.94796	2.84438	1.80346	1.04834	0.576459	0.353189	0.159182	-0.0490561	3.38908	2.19321	1.04185	0.511376	0.310053	0.248224	0.0895215	-0.0530515
	2.84	3.94923	2.84521	1.80568	1.05254	0.579026	0.355173	0.160197	-0.0464444	3.39018	2.19207	1.04226	0.516341	0.311926	0.249857	0.0863509	-0.0588925
	2.84333	3.94587	2.85195	1.80608	1.05085	0.579301	0.356102	0.155634	-0.0459862	3.3973	2.1921	1.04066	0.513046	0.312672	0.248668	0.0867354	-0.0571512
	2.84667	3.94524	2.84952	1.80521	1.05399	0.577344	0.357126	0.160632	-0.045431	3.39319	2.19165	1.03604	0.514489	0.310788	0.24978	0.0884942	-0.0570831
	2.85	3.95165	2.85517	1.80445	1.05639	0.580292	0.355288	0.160313	-0.0447412	3.39428	2.19294	1.04376	0.516245	0.314316	0.255056	0.0851406	-0.0556421
	2.85333	3.95328	2.84852	1.80637	1.05067	0.583144	0.35919	0.159286	-0.0434475	3.39572	2.18882	1.03901	0.516448	0.315994	0.250052	0.0859748	-0.0543911
	2.85667	3.95411	2.85459	1.80512	1.05547	0.577063	0.356278	0.159841	-0.0481377	3.39166	2.1953	1.04248	0.509186	0.310938	0.248474	0.084821	-0.0571561
	2.86	3.94992	2.85425	1.80768	1.05459	0.581554	0.357831	0.159224	-0.0454236	3.40299	2.19517	1.04155	0.515309	0.309353	0.249732	0.0867606	-0.0550564
	2.86333	3.95777	2.85312	1.8136	1.05015	0.579472	0.356235	0.15797	-0.0413992	3.40228	2.19803	1.04299	0.518703	0.31294	0.248904	0.0866709	-0.0562042
	2.86667	3.96348	2.8597	1.8067	1.05391	0.581587	0.357428	0.159732	-0.0497033	3.39797	2.19675	1.0389	0.514497	0.307953	0.25384	0.0846149	-0.0575601
	2.87	3.95647	2.85739	1.8114	1.05624	0.582307	0.35602	0.159444	-0.0453875	3.40134	2.19775	1.04683	0.514939	0.312128	0.251411	0.0813721	-0.0575647
	2.87333	3.95895	2.86306	1.81482	1.05693	0.581412	0.35806	0.161122	-0.0470945	3.40281	2.20063	1.04442	0.513247	0.313859	0.249126	0.0861571	-0.0567601
	2.87667	3.95802	2.86345	1.80992	1.05233	0.578471	0.355362	0.156137	-0.0476406	3.40263	2.19992	1.04864	0.518619	0.312891	0.249799	0.0871869	-0.0559571
	2.88	3.96075	2.86406	1.81256	1.05404	0.582358	0.356026	0.158967	-0.0462552	3.40421	2.20395	1.04575	0.513806	0.312293	0.251654	0.0863989	-0.0581894
	2.88333	3.9555	2.8652	1.81421	1.05695	0.58277	0.353021	0.162788	-0.045381	3.40653	2.20253	1.05151	0.51498	0.315438	0.249496	0.0819994	-0.0584895
	2.88667	3.96046	2.86402	1.81322	1.05583	0.584331	0.35937	0.157947	-0.0442398	3.40653	2.20396	1.05421	0.516068	0.313531	0.251671	0.084125	-0.0571964
	2.89	3.95819	2.86228	1.81303	1.05597	0.578482	0.357176	0.157687	-0.045775	3.40601	2.208	1.04975	0.511289	0.312378	0.250825	0.0841591	-0.0586202
	2.89333	3.96207	2.86434	1.81705	1.05661	0.580603	0.355286	0.161319	-0.0434732	3.40824	2.20905	1.04457	0.515846	0.314427	0.250173	0.0869393	-0.0534664
	2.89667	3.96338	2.86953	1.81617	1.06057	0.584546	0.359974	0.162431	-0.0480496	3.40984	2.20867	1.04716	0.51142	0.31382	0.253099	0.0869616	-0.06032
	2.9	3.96201	2.8679	1.81918	1.05821	0.578877	0.354678	0.155302	-0.0459305	3.40804	2.20447	1.04809	0.511138	0.312656	0.247101	0.0877762	-0.0556077
	2.90333	3.96501	2.86329	1.81953	1.05713	0.577226	0.359257	0.162399	-0.0453559	3.41335	2.20746	1.04967	0.514772	0.315085	0.252016	0.0865947	-0.058593
	2.90667	3.96457	2.86722	1.82232	1.06093	0.582918	0.359586	0.158743	-0.0457586	3.41575	2.21001	1.04889	0.516662	0.312237	0.252189	0.0864825	-0.0589198
	2.91	3.9648	2.86979	1.82135	1.06269	0.581044	0.355999	0.162118	-0.0477988	3.41166	2.21049	1.05273	0.51439	0.315677	0.252198	0.0880028	-0.0594165
	2.91333	3.96531	2.8699	1.82265	1.05877	0.580467	0.358399	0.161036	-0.0447713	3.41388	2.21199	1.04791	0.51915	0.309818	0.249168	0.0858304	-0.0608644
	2.91667	3.97111	2.87404	1.82409	1.06157	0.578881	0.358377	0.160827	-0.0475564	3.42025	2.21365	1.05259	0.514548	0.313546	0.254568	0.0846268	-0.0566772
	2.92	3.96767	2.87328	1.81952	1.05851	0.580454	0.352974	0.156437	-0.0492462	3.41204	2.21523	1.05518	0.51649	0.309289	0.247344	0.0839573	-0.0589525
	2.92333	3.97031	2.88094	1.82694	1.06187	0.585936	0.357437	0.155025	-0.0440376	3.41894	2.21351	1.05002	0.519128	0.313039	0.245272	0.0827929	-0.0554757
	2.92667	3.97315	2.87428	1.82822	1.05619	0.582392	0.356853	0.158696	-0.0417147	3.42119	2.21836	1.05439	0.512656	0.311206	0.254395	0.0848717	-0.0589915
	2.93	3.97402	2.87374	1.82262	1.05893	0.582263	0.351198	0.157254	-0.0481722	3.42057	2.21739	1.05073	0.514506	0.312627	0.252242	0.0885878	-0.0626093
	2.93333	3.97364	2.88129	1.82662	1.06459	0.587291	0.352519	0.161134	-0.0465001	3.41946	2.21841	1.059	0.517552	0.315491	0.249397	0.0830192	-0.0583477
	2.93667	3.97754	2.87651	1.82952	1.06389	0.582945	0.355242	0.15946	-0.0420566	3.41758	2.22248	1.05316	0.514055	0.31273	0.251515	0.0850047	-0.0567242
	2.94	3.97511	2.88313	1.82687	1.06155	0.582357	0.359168	0.154177	-0.0482842	3.41986	2.2219	1.05319	0.514034	0.309853	0.249201	0.0835451	-0.061325
	2.94333	3.97722	2.88175	1.8276	1.06286	0.581552	0.350155	0.157879	-0.0448338	3.42306	2.22089	1.0523	0.517515	0.312969	0.253703	0.0867617	-0.0589291
	2.94667	3.9774	2.87827	1.82699	1.06257	0.580677	0.355255	0.161485	-0.0466283	3.42283	2.22476	1.05747	0.521543	0.313784	0.250101	0.0880531	-0.0597157
	2.95	3.98271	2.88218	1.83176	1.06111	0.580485	0.35853	0.157644	-0.0491054	3.42699	2.22129	1.05803	0.515198	0.310343	0.249889	0.0832182	-0.060934
	2.95333	3.97844	2.88316	1.82826	1.06283	0.583673	0.3572	0.157662	-0.0482952	3.43192	2.23092	1.05713	0.514546	0.312477	0.252387	0.0859101	-0.0559484
	2.95667	3.97941	2.88455	1.83308	1.06361	0.579362	0.35594	0.162287	-0.0516552	3.42541	2.22437	1.05821	0.516636	0.314084	0.246745	0.0891799	-0.0601597
	2.96	3.98028	2.8859	1.8317	1.06626	0.581779	0.351273	0.160996	-0.0475237	3.42676	2.22726	1.05812	0.518334	0.313566	0.251703	0.0828675	-0.0595043
	2.96333	3.98297	2.88739	1.83332	1.06549	0.586136	0.360806	0.160935	-0.0467535	3.42788	2.22743	1.05901	0.517294	0.313798	0.252749	0.0857608	-0.0575902
	2.96667	3.98022	2.88934	1.83063	1.06302	0.58497	0.352234	0.161152	-0.0501566	3.43178	2.22849	1.06055	0.516024	0.319576	0.249682	0.0850303	-0.0608817
	2.97	3.98826	2.88915	1.83393	1.06677	0.583819	0.36009	0.163058	-0.0484815	3.43151	2.2315	1.05662	0.515093	0.314053	0.250723	0.0862054	-0.05963
	2.97333	3.98104	2.89016	1.83011	1.06476	0.585973	0.351989	0.159337	-0.0463556	3.43267	2.23288	1.05721	0.514355	0.313415	0.252255	0.0839128	-0.0593216
	2.97667	3.98594	2.89228	1.83429	1.06687	0.585032	0.356895	0.159715	-0.0448869	3.43314	2.23024	1.05793	0.518766	0.31354	0.250294	0.0896134	-0.061106
	2.98	3.98699	2.8947	1.83743	1.06462	0.584319	0.359034	0.159332	-0.0474103	3.43412	2.22922	1.05637	0.518071	0.315448	0.252066	0.0872563	-0.0610487
	2.98333	3.98426	2.89403	1.83598	1.06692	0.585103	0.356947	0.15923	-0.0485606	3.43407	2.22984	1.0608	0.516755	0.310211	0.249054	0.0827725	-0.0592247
	2.98667	3.98875	2.89121	1.83789	1.06851	0.583083	0.35776	0.160148	-0.0509507	3.43602	2.2296	1.06008	0.518963	0.316704	0.250203	0.0833334	-0.0562301
	2.99	3.98792	2.89315	1.83686	1.06649	0.581478	0.35681	0.155818	-0.0478201	3.4337	2.23342	1.059	0.518223	0.31745	0.253873	0.0864539	-0.0602822
	2.99333	3.98823	2.89335	1.84005	1.06782	0.583543	0.357524	0.162431	-0.048433	3.43832	2.23847	1.05774	0.517858	0.310592	0.250562	0.0855327	-0.0606128
	2.99667	3.98628	2.89523	1.83871	1.07047	0.58275	0.355787	0.156168	-0.045538	3.43958	2.23431	1.06071	0.520182	0.315591	0.245366	0.0807581	-0.0579588
	3	3.99053	2.89574	1.83839	1.06938	0.583563	0.360498	0.160248	-0.0462567	3.43724	2.24218	1.0677	0.524086	0.314017	0.255306	0.0919797	-0.061046
	3.00333	3.98964	2.90294	1.83845	1.06695	0.58424	0.357337	0.160192	-0.0445203	3.44291	2.24206	1.06753	0.519994	0.313563	0.250085	0.0871713	-0.0589936
	3.00667	3.99747	2.90006	1.84138	1.06983	0.588501	0.355015	0.1574	-0.0477282	3.44354	2.23898	1.06537	0.52624	0.314412	0.252434	0.0865551	-0.0624544
	3.01	3.98983	2.90008	1.8429	1.06904	0.58452	0.358023	0.16176	-0.0472308	3.44228	2.241	1.06357	0.523103	0.310818	0.254052	0.0819005	-0.0592241
	3.01333	3.99196	2.90091	1.84571	1.07424	0.583345	0.361597	0.156165	-0.0525559	3.44272	2.24009	1.06658	0.518183	0.31758	0.251591	0.0849013	-0.0614257
	3.01667	3.99354	2.89941	1.84178	1.07241	0.581433	0.361011	0.160778	-0.0462056	3.44536	2.24606	1.06654	0.520185	0.313545	0.250859	0.0880391	-0.0574131
	3.02	3.9966	2.90204	1.84562	1.07067	0.584087	0.357655	0.157711	-0.0474116	3.44141	2.24836	1.06799	0.516314	0.313187	0.251595	0.0852002	-0.0570861
	3.02333	3.99251	2.9023	1.8461	1.06841	0.584452	0.359332	0.161622	-0.0488999	3.44486	2.25044	1.06475	0.518903	0.314722	0.251896	0.0855901	-0.0626794
	3.02667	3.99465	2.90254	1.84872	1.07342	0.585461	0.36184	0.159329	-0.0500649	3.44803	2.24908	1.06809	0.518481	0.310692	0.25078	0.0849289	-0.060907
	3.03	3.99406	2.90725	1.85117	1.07196	0.582405	0.357098	0.160698	-0.0517241	3.44512	2.24743	1.06387	0.520876	0.316768	0.248707	0.0866362	-0.0604926
	3.03333	3.99703	2.91035	1.84498	1.07325	0.591235	0.361186	0.157849	-0.0481733	3.44985	2.25558	1.06847	0.51847	0.311359	0.254407	0.0880825	-0.0577285
	3.03667	3.9986	2.9103	1.84522	1.07747	0.586596	0.355133	0.161796	-0.0484393	3.44945	2.24658	1.06674	0.517874	0.314082	0.253709	0.0871032	-0.0620836
	3.04	4.00249	2.90837	1.8482	1.07518	0.586488	0.357755	0.152965	-0.0450258	3.44918	2.25236	1.06708	0.524203	0.314343	0.25176	0.0829434	-0.0638568
	3.04333	4.00557	2.91239	1.85152	1.07476	0.586736	0.361574	0.158675	-0.0489247	3.4563	2.25286	1.06954	0.52319	0.314318	0.249045	0.0867938	-0.0609234
	3.04667	4.00175	2.91069	1.84819	1.06962	0.582432	0.355218	0.159885	-0.0486918	3.45261	2.25011	1.06604	0.52127	0.312752	0.254025	0.0833221	-0.0607389
	3.05	4.0002	2.9126	1.85218	1.06864	0.585255	0.355663	0.161122	-0.0474482	3.45859	2.25632	1.07022	0.522672	0.313925	0.251283	0.0882045	-0.0572681
	3.05333	4.00552	2.91282	1.85603	1.07255	0.588205	0.359235	0.15731	-0.0485503	3.45863	2.25535	1.07202	0.52109	0.314749	0.248867	0.0818034	-0.0614722
	3.05667	4.00218	2.91181	1.85223	1.07403	0.587312	0.362874	0.158733	-0.0481695	3.45256	2.25568	1.07253	0.520109	0.309886	0.25096	0.086174	-0.0616019
	3.06	4.00736	2.91438	1.85204	1.07535	0.588942	0.359843	0.158893	-0.0508931	3.45261	2.25042	1.06857	0.523507	0.313237	0.250614	0.0891248	-0.05666
	3.06333	4.00716	2.91503	1.85377	1.07436	0.592178	0.358946	0.157255	-0.0445052	3.45496	2.25811	1.07626	0.523961	0.316399	0.251811	0.0886639	-0.0615761
	3.06667	4.00781	2.91862	1.85396	1.07253	0.584969	0.360167	0.160109	-0.0493309	3.45688	2.25584	1.07341	0.521231	0.31469	0.251612	0.0855678	-0.0606534
	3.07	4.00647	2.91753	1.85507	1.07423	0.589715	0.359391	0.159466	-0.049387	3.45946	2.25802	1.07106	0.521466	0.311404	0.246759	0.0839151	-0.0578663
	3.07333	4.00557	2.92024	1.8565	1.07593	0.588349	0.356043	0.160853	-0.049292	3.45942	2.26174	1.07011	0.524261	0.312921	0.254301	0.0821979	-0.0565122
	3.07667	4.01194	2.91908	1.85315	1.08292	0.583689	0.359815	0.155961	-0.0488049	3.45762	2.2611	1.07256	0.52034	0.31165	0.252115	0.0855178	-0.0607136
	3.08	4.01023	2.92114	1.8586	1.07451	0.585338	0.357317	0.15956	-0.0472653	3.46106	2.26033	1.07768	0.520581	0.316866	0.250659	0.0869287	-0.059904
	3.08333	4.01258	2.92595	1.85963	1.07762	0.587872	0.359989	0.159203	-0.0515229	3.46238	2.26462	1.07748	0.522289	0.314885	0.252686	0.0859176	-0.0637825
	3.08667	4.01271	2.92195	1.85923	1.08073	0.588179	0.360346	0.159748	-0.0479771	3.45997	2.26421	1.07027	0.516534	0.311818	0.248476	0.0821836	-0.0624278
	3.09	4.01237	2.92582	1.86457	1.07916	0.585459	0.356248	0.159022	-0.0493039	3.46411	2.26315	1.07173	0.52274	0.31396	0.250125	0.0838364	-0.064038
	3.09333	4.01324	2.93073	1.85664	1.07734	0.590269	0.360835	0.158347	-0.0477864	3.46537	2.26887	1.07802	0.524438	0.311734	0.25145	0.0852336	-0.059532
	3.09667	4.01435	2.9265	1.86122	1.07928	0.590422	0.359434	0.156964	-0.0545858	3.4649	2.26618	1.07874	0.518624	0.312233	0.254417	0.0831689	-0.0613617
	3.1	4.01358	2.92295	1.86445	1.07726	0.587307	0.356655	0.161032	-0.0502588	3.4663	2.26598	1.07577	0.518208	0.312481	0.253704	0.0845929	-0.0626971
	3.10333	4.014	2.93105	1.86013	1.08321	0.588011	0.360126	0.158438	-0.045538	3.47032	2.27178	1.07438	0.52544	0.313131	0.251427	0.0848318	-0.0612659
	3.10667	4.0192	2.93085	1.86273	1.0803	0.585569	0.362223	0.158857	-0.0527906	3.47167	2.26952	1.07675	0.524338	0.309178	0.249447	0.0860612	-0.0634605
	3.11	4.02161	2.93124	1.86583	1.07902	0.58794	0.357831	0.157673	-0.0534496	3.46849	2.27299	1.07717	0.521123	0.309832	0.253893	0.0838948	-0.0589579
	3.11333	4.02178	2.93068	1.86026	1.07933	0.588703	0.360464	0.159693	-0.0483236	3.4667	2.26983	1.07798	0.520104	0.312426	0.250746	0.0873399	-0.0612147
	3.11667	4.02092	2.9326	1.86498	1.0798	0.587913	0.36197	0.161162	-0.0485807	3.47064	2.27336	1.07997	0.523378	0.317503	0.251196	0.0870794	-0.0618071
	3.12	4.0186	2.93659	1.87018	1.08499	0.590198	0.357142	0.159699	-0.0499927	3.47557	2.27556	1.07744	0.51887	0.313098	0.250687	0.0861026	-0.0596277
	3.12333	4.0251	2.93456	1.87026	1.07999	0.59262	0.360416	0.161171	-0.0491341	3.47198	2.27712	1.07928	0.525527	0.313172	0.253692	0.085723	-0.0602481
	3.12667	4.01675	2.93691	1.86852	1.08231	0.590687	0.361613	0.164818	-0.0501019	3.47803	2.27637	1.08287	0.522408	0.316213	0.252364	0.0880688	-0.0602859
	3.13	4.02182	2.93899	1.86873	1.08322	0.588109	0.363453	0.161099	-0.0461044	3.47172	2.27572	1.07898	0.521925	0.315056	0.250603	0.0899837	-0.0610278
	3.13333	4.02356	2.93531	1.871	1.08236	0.587051	0.360386	0.159246	-0.0499603	3.47699	2.2765	1.08184	0.52445	0.312639	0.250835	0.0839119	-0.06168
	3.13667	4.02429	2.93399	1.86827	1.08146	0.586623	0.361722	0.158947	-0.0500382	3.47672	2.27861	1.07865	0.52354	0.313985	0.251829	0.0847989	-0.0635863
	3.14	4.02734	2.93861	1.87157	1.08161	0.585097	0.360707	0.161087	-0.048547	3.47386	2.27888	1.07746	0.522892	0.311467	0.251349	0.0817706	-0.0642614
	3.14333	4.03053	2.94178	1.86668	1.08486	0.58928	0.358912	0.159231	-0.0474955	3.47709	2.28196	1.0813	0.520717	0.318271	0.250969	0.0831393	-0.062644
	3.14667	4.02609	2.9403	1.8782	1.08402	0.588462	0.363598	0.159484	-0.0493615	3.47544	2.27944	1.08059	0.521507	0.314961	0.248873	0.0866797	-0.0617255
	3.15	4.02721	2.93877	1.87241	1.07895	0.59279	0.360598	0.16368	-0.0486583	3.48223	2.27854	1.08068	0.526778	0.312169	0.253158	0.0866095	-0.0612691
	3.15333	4.03062	2.9434	1.87716	1.08474	0.589149	0.361551	0.158342	-0.0490836	3.48121	2.28165	1.08341	0.522493	0.314354	0.247216	0.0850984	-0.0568867
	3.15667	4.03031	2.9475	1.87467	1.08482	0.588466	0.361716	0.160562	-0.0524908	3.48322	2.29055	1.08662	0.523005	0.31708	0.250135	0.0853033	-0.0616379
	3.16	4.02887	2.94437	1.87255	1.08139	0.592612	0.361556	0.16072	-0.0470168	3.48111	2.28661	1.08366	0.524117	0.314809	0.250839	0.0889672	-0.0661192
	3.16333	4.03114	2.94559	1.8774	1.08389	0.594103	0.358783	0.160271	-0.0509378	3.48505	2.2895	1.08713	0.521221	0.317318	0.253746	0.0858866	-0.0634631
	3.16667	4.03149	2.94606	1.87366	1.08924	0.589404	0.362806	0.162626	-0.0482999	3.48528	2.28223	1.08575	0.530148	0.313196	0.251355	0.0867817	-0.0657428
	3.17	4.03281	2.94575	1.87914	1.08547	0.592441	0.362312	0.164162	-0.0497228	3.48364	2.28737	1.08962	0.523825	0.315794	0.25226	0.0886882	-0.0648054
	3.17333	4.03427	2.95212	1.87961	1.08504	0.588836	0.359995	0.159115	-0.04879	3.48565	2.29028	1.08531	0.523202	0.314673	0.248969	0.0825468	-0.0689252
	3.17667	4.03556	2.94331	1.8782	1.08674	0.592693	0.366139	0.163284	-0.0476136	3.48568	2.29135	1.08713	0.525627	0.313331	0.25422	0.086316	-0.0656963
	3.18	4.03464	2.95199	1.87876	1.08806	0.587997	0.360141	0.162204	-0.0494665	3.48822	2.2868	1.08382	0.523336	0.314661	0.249954	0.0857765	-0.0583423
	3.18333	4.0397	2.95352	1.87962	1.08824	0.589895	0.360957	0.162928	-0.0502898	3.48786	2.29426	1.08648	0.524023	0.318248	0.248188	0.0851655	-0.0624475
	3.18667	4.04021	2.9502	1.88001	1.08895	0.593678	0.367377	0.160978	-0.0509517	3.48934	2.29515	1.08996	0.522752	0.315395	0.254625	0.0834118	-0.0655149
	3.19	4.03235	2.95302	1.88169	1.08812	0.594793	0.364348	0.159951	-0.052917	3.49249	2.29516	1.08705	0.527576	0.312831	0.255032	0.0869964	-0.067397
	3.19333	4.03807	2.95411	1.87522	1.0868	0.590449	0.364441	0.165126	-0.0539786	3.48581	2.29552	1.08449	0.527739	0.314271	0.252025	0.0811525	-0.0614691
	3.19667	4.03737	2.95016	1.88342	1.0888	0.592943	0.358184	0.165613	-0.0489587	3.49647	2.29255	1.08967	0.526398	0.312764	0.250981	0.0888027	-0.0603045
	3.2	4.039	2.95725	1.88093	1.09227	0.59873	0.36314	0.160847	-0.0500845	3.49163	2.29735	1.08574	0.524743	0.317564	0.253858	0.0822526	-0.0606122
	3.20333	4.0409	2.95305	1.88209	1.09066	0.590003	0.364493	0.161153	-0.048953	3.49313	2.29436	1.09038	0.524013	0.317441	0.251217	0.0848591	-0.0633066
	3.20667	4.04011	2.95639	1.88523	1.09309	0.594769	0.360931	0.159838	-0.0528997	3.49067	2.29229	1.08884	0.526347	0.311014	0.253117	0.0839618	-0.0648544
	3.21	4.04202	2.9559	1.88593	1.09019	0.592072	0.362146	0.16041	-0.0447277	3.49859	2.30301	1.09062	0.528641	0.316244	0.252399	0.0821733	-0.0633443
	3.21333	4.04196	2.96156	1.88569	1.09091	0.593021	0.360493	0.162374	-0.0496561	3.49658	2.30148	1.09437	0.523265	0.312708	0.253428	0.0844644	-0.0673834
	3.21667	4.04342	2.95961	1.8878	1.08964	0.591583	0.360017	0.161413	-0.0496935	3.49509	2.30141	1.09163	0.524689	0.312712	0.252743	0.08684	-0.0615447
	3.22	4.04344	2.95984	1.88589	1.09244	0.595168	0.360897	0.159621	-0.0488436	3.50013	2.3042	1.09399	0.523334	0.316096	0.245208	0.0894952	-0.0667783
	3.22333	4.04849	2.95845	1.88863	1.09069	0.592749	0.360776	0.159649	-0.0513803	3.50256	2.30866	1.09196	0.525122	0.315329	0.254023	0.0910288	-0.0638911
	3.22667	4.04738	2.96283	1.88725	1.09433	0.593768	0.360166	0.161537	-0.0512444	3.49901	2.30486	1.09567	0.524653	0.313994	0.250285	0.0867031	-0.0660525
	3.23	4.04572	2.96438	1.88975	1.09477	0.594434	0.363448	0.160625	-0.0520461	3.50313	2.30462	1.09465	0.524952	0.316088	0.252839	0.0831909	-0.0606102
	3.23333	4.05021	2.96921	1.88876	1.09512	0.590671	0.362451	0.159178	-0.0529267	3.50126	2.30588	1.09726	0.527275	0.314067	0.254951	0.0864894	-0.0616514
	3.23667	4.04728	2.96543	1.89178	1.09263	0.591862	0.364423	0.16354	-0.0546749	3.49872	2.31289	1.0934	0.527065	0.315194	0.249739	0.0849429	-0.0664476
	3.24	4.04872	2.967	1.89024	1.09283	0.59441	0.360312	0.159803	-0.0534599	3.49805	2.30728	1.09446	0.531921	0.313217	0.252437	0.0900175	-0.0658921
	3.24333	4.05103	2.96745	1.88923	1.09476	0.592533	0.367065	0.159006	-0.0476928	3.50727	2.31019	1.09451	0.523916	0.315186	0.247267	0.0833911	-0.0664601
	3.24667	4.04871	2.96901	1.89054	1.09757	0.591846	0.361529	0.165721	-0.0484785	3.50132	2.31293	1.09859	0.526243	0.313385	0.257076	0.0882044	-0.0641265
	3.25	4.05069	2.97117	1.89784	1.09969	0.58967	0.361507	0.161958	-0.0476509	3.50473	2.30744	1.09653	0.523977	0.315765	0.250959	0.0842552	-0.0608807
	3.25333	4.05175	2.96775	1.89379	1.09639	0.592819	0.360943	0.162519	-0.0531871	3.50361	2.3123	1.09263	0.526184	0.314992	0.252624	0.0823986	-0.0618763
	3.25667	4.0512	2.97285	1.89674	1.09415	0.594828	0.359189	0.161689	-0.0536285	3.50718	2.31424	1.09523	0.525561	0.318431	0.254213	0.0843189	-0.0584047
	3.26	4.05099	2.96689	1.8951	1.09724	0.593658	0.362829	0.158641	-0.0518949	3.50975	2.31259	1.09635	0.527366	0.314845	0.249325	0.0873644	-0.0643999
	3.26333	4.055	2.96841	1.89535	1.09673	0.592396	0.362516	0.161067	-0.049822	3.50815	2.31215	1.09716	0.529407	0.314599	0.252345	0.0836533	-0.0643941
	3.26667	4.05773	2.9745	1.89646	1.09654	0.592708	0.360277	0.161126	-0.0543806	3.51498	2.31542	1.09827	0.524386	0.317223	0.252734	0.0841721	-0.0642221
	3.27	4.05735	2.97153	1.89819	1.09656	0.593435	0.363135	0.161828	-0.0537359	3.51138	2.31391	1.10038	0.529145	0.316851	0.254022	0.0823582	-0.0646011
	3.27333	4.05762	2.97231	1.89958	1.09852	0.592487	0.364855	0.163408	-0.0514258	3.51409	2.32249	1.10025	0.525615	0.314631	0.25178	0.0859337	-0.065364
	3.27667	4.05306	2.97437	1.8994	1.10251	0.596258	0.35589	0.159096	-0.0517369	3.51585	2.31826	1.09772	0.524511	0.314798	0.249354	0.081212	-0.0640208
	3.28	4.05878	2.97503	1.9024	1.09889	0.594095	0.358176	0.162533	-0.051107	3.5115	2.32222	1.1044	0.525892	0.313825	0.253151	0.0833336	-0.0601293
	3.28333	4.06035	2.97969	1.89995	1.09737	0.593474	0.366182	0.162041	-0.0541568	3.51075	2.31791	1.10073	0.532074	0.31561	0.257128	0.0839016	-0.0625349
	3.28667	4.05583	2.97991	1.89764	1.10094	0.599293	0.360291	0.159249	-0.0471346	3.51579	2.31826	1.10602	0.525213	0.314559	0.25229	0.087154	-0.0632114
	3.29	4.05687	2.97857	1.90505	1.09618	0.596965	0.359331	0.160505	-0.0515416	3.51799	2.322	1.09459	0.532591	0.318243	0.249821	0.0876298	-0.0628103
	3.29333	4.05764	2.98386	1.89898	1.10274	0.60024	0.364516	0.1633	-0.0509954	3.51756	2.3218	1.10332	0.532166	0.31609	0.249871	0.0836525	-0.0665539
	3.29667	4.06125	2.98106	1.90081	1.09399	0.595078	0.362787	0.158769	-0.0516189	3.51482	2.32323	1.10015	0.529785	0.314055	0.25229	0.0867513	-0.0648854
	3.3	4.06203	2.97949	1.90512	1.09886	0.594767	0.365921	0.156899	-0.0511071	3.52287	2.32437	1.10625	0.530915	0.315557	0.251346	0.0839994	-0.0624295
	3.30333	4.06035	2.98192	1.90257	1.09779	0.596027	0.365583	0.163132	-0.0526043	3.51484	2.32619	1.10588	0.530644	0.314644	0.250345	0.0852095	-0.0618767
	3.30667	4.06268	2.98183	1.90453	1.0974	0.594654	0.361261	0.162007	-0.048241	3.51194	2.3212	1.10384	0.534639	0.312951	0.249037	0.0889222	-0.0629506
	3.31	4.06194	2.98375	1.90513	1.09892	0.595951	0.361737	0.158698	-0.0509588	3.52258	2.32463	1.10193	0.529402	0.314767	0.254675	0.0843069	-0.0691959
	3.31333	4.06514	2.98712	1.90694	1.10157	0.596634	0.360782	0.162253	-0.0516052	3.52011	2.32873	1.10241	0.529001	0.317198	0.252839	0.0861043	-0.0677489
	3.31667	4.06574	2.9872	1.90597	1.1043	0.589299	0.36879	0.163605	-0.0574647	3.51687	2.32768	1.10494	0.529021	0.314025	0.248485	0.0856662	-0.0677584
	3.32	4.0648	2.98817	1.90872	1.10099	0.598908	0.362449	0.161875	-0.0511132	3.52427	2.33119	1.10571	0.525984	0.321269	0.252194	0.0903755	-0.0600955
	3.32333	4.07058	2.98906	1.91425	1.10506	0.596563	0.36742	0.161378	-0.0525681	3.51822	2.33314	1.10319	0.528568	0.315705	0.250747	0.0836859	-0.0639801
	3.32667	4.07516	2.98611	1.90821	1.10067	0.597177	0.364923	0.15801	-0.0542359	3.52566	2.3306	1.10586	0.52728	0.315985	0.253363	0.0879196	-0.06043
	3.33	4.06548	2.99397	1.9108	1.09881	0.597789	0.359662	0.163704	-0.0514439	3.52987	2.33167	1.10608	0.53078	0.313569	0.250096	0.0845728	-0.0614164
	3.33333	4.07264	2.98972	1.91088	1.10448	0.597251	0.360019	0.159166	-0.049283	3.52702	2.33684	1.11341	0.529952	0.314904	0.255088	0.0823566	-0.0622749
	3.33667	4.07257	2.98687	1.91156	1.10412	0.596611	0.364137	0.165612	-0.0531963	3.52564	2.33252	1.1057	0.531636	0.316216	0.252818	0.0843524	-0.0660891
	3.34	4.07272	2.99555	1.91181	1.10666	0.596722	0.362861	0.158485	-0.0536097	3.52661	2.33949	1.10834	0.531168	0.317428	0.250516	0.0841343	-0.0641898
	3.34333	4.0758	2.9933	1.91076	1.10489	0.599402	0.361662	0.163613	-0.0574926	3.5328	2.33591	1.10925	0.529355	0.319333	0.250581	0.0825565	-0.0644563
	3.34667	4.07347	2.99537	1.90978	1.10402	0.593535	0.363577	0.158503	-0.054902	3.52957	2.33869	1.10906	0.530758	0.315231	0.252765	0.0869197	-0.064528
	3.35	4.07695	2.99315	1.91367	1.10504	0.59766	0.361513	0.159808	-0.0528742	3.52815	2.33936	1.10978	0.528924	0.314228	0.252394	0.0851771	-0.0653186
	3.35333	4.07371	2.99869	1.9171	1.10686	0.59679	0.365169	0.163927	-0.0484288	3.53197	2.34246	1.10864	0.527622	0.317461	0.253115	0.0869397	-0.0677904
	3.35667	4.07792	2.99359	1.9106	1.10472	0.602011	0.368013	0.162061	-0.0476212	3.53251	2.34124	1.11068	0.532097	0.318328	0.252497	0.0862003	-0.0653242
	3.36	4.07329	2.99442	1.91856	1.10701	0.596532	0.364244	0.161993	-0.0546054	3.5337	2.34149	1.11389	0.530885	0.317502	0.249707	0.0853417	-0.0656287
	3.36333	4.07709	2.99848	1.91375	1.11124	0.598576	0.364172	0.156947	-0.0518735	3.52905	2.34255	1.11229	0.529429	0.3182	0.251435	0.0845424	-0.0649385
	3.36667	4.0804	2.99406	1.91544	1.10981	0.59694	0.365631	0.161221	-0.0483484	3.53586	2.34849	1.113	0.529319	0.318817	0.251736	0.0870845	-0.0680935
	3.37	4.07302	2.99866	1.91884	1.10637	0.601233	0.366978	0.159189	-0.0548889	3.5388	2.34846	1.11192	0.530968	0.314623	0.251542	0.0850912	-0.0643098
	3.37333	4.07815	2.99712	1.91582	1.10851	0.597678	0.361044	0.158022	-0.0515779	3.54066	2.34138	1.11366	0.53024	0.317416	0.253474	0.0852806	-0.0645827
	3.37667	4.07874	3.00594	1.91822	1.10506	0.601846	0.360744	0.162784	-0.0575591	3.53894	2.34558	1.11682	0.53536	0.315192	0.251802	0.0840892	-0.0632522
	3.38	4.07776	3.00409	1.91797	1.11025	0.596529	0.367505	0.156969	-0.0552229	3.53773	2.34512	1.1127	0.527634	0.318725	0.251909	0.0842886	-0.0681115
	3.38333	4.08077	2.99981	1.91717	1.11049	0.597764	0.363561	0.160726	-0.0499377	3.54134	2.34875	1.11371	0.528344	0.314083	0.250562	0.086743	-0.0679112
	3.38667	4.07939	3.00585	1.92201	1.11076	0.597826	0.363796	0.160883	-0.0530771	3.53882	2.3488	1.11524	0.531532	0.311463	0.249462	0.0799439	-0.067557
	3.39	4.081	3.00367	1.92318	1.10708	0.598441	0.360475	0.159627	-0.059785	3.54409	2.34789	1.11489	0.531918	0.316861	0.250395	0.0866736	-0.063699
	3.39333	4.08	3.00667	1.9203	1.10844	0.5987	0.362413	0.159344	-0.0516833	3.54373	2.35355	1.11412	0.530173	0.315273	0.251197	0.0826007	-0.0670507
	3.39667	4.0834	3.0115	1.92148	1.11171	0.601738	0.36267	0.161841	-0.0537217	3.54278	2.34669	1.1133	0.532033	0.320405	0.256586	0.0842577	-0.0639719
	3.4	4.07858	3.00741	1.9214	1.10911	0.597951	0.361163	0.162756	-0.0542925	3.5379	2.35025	1.11619	0.535762	0.316143	0.251611	0.0877736	-0.0680997
	3.40333	4.08502	3.00783	1.92398	1.11174	0.598233	0.363589	0.163451	-0.0536344	3.54656	2.35567	1.11877	0.531193	0.311883	0.247343	0.0859086	-0.0658035
	3.40667	4.08753	3.01264	1.92285	1.10858	0.602641	0.36493	0.161865	-0.0520407	3.54372	2.35881	1.11737	0.531413	0.313302	0.252016	0.0834227	-0.0680058
	3.41	4.09058	3.00919	1.92764	1.11166	0.600907	0.36242	0.162091	-0.0550594	3.54349	2.35466	1.11639	0.531633	0.319052	0.250208	0.0853877	-0.0653301
	3.41333	4.08704	3.01653	1.92363	1.1092	0.599008	0.359339	0.165144	-0.061382	3.54626	2.35438	1.11804	0.53139	0.316006	0.251576	0.0871763	-0.0676753
	3.41667	4.08665	3.01256	1.92666	1.11892	0.596026	0.363651	0.161008	-0.0496453	3.54676	2.35635	1.11989	0.533155	0.31832	0.251176	0.086505	-0.0673474
	3.42	4.08741	3.01581	1.92826	1.11145	0.598738	0.361974	0.162989	-0.0537476	3.5451	2.35213	1.11797	0.533145	0.316863	0.252779	0.0865381	-0.0676954
	3.42333	4.09026	3.01058	1.9299	1.11004	0.600643	0.365057	0.162466	-0.0530918	3.54565	2.35888	1.12073	0.530109	0.313593	0.249624	0.0853248	-0.0661769
	3.42667	4.09244	3.01301	1.93316	1.10786	0.599932	0.367601	0.161239	-0.0541122	3.55215	2.36192	1.12076	0.533423	0.312753	0.247378	0.0896603	-0.0638755
	3.43	4.0942	3.01817	1.92915	1.11008	0.59902	0.363052	0.161863	-0.0540185	3.55308	2.35692	1.12231	0.531444	0.314041	0.25143	0.0868364	-0.0674206
	3.43333	4.09422	3.01682	1.93123	1.11402	0.602272	0.362358	0.160601	-0.054102	3.54962	2.36318	1.12288	0.532424	0.31563	0.252187	0.0888024	-0.0664041
	3.43667	4.09511	3.0214	1.92884	1.11417	0.59893	0.365651	0.16248	-0.0515806	3.55079	2.36239	1.12066	0.53631	0.313616	0.251504	0.0871838	-0.0654927
	3.44	4.0896	3.01905	1.93264	1.11256	0.599118	0.361785	0.164529	-0.0526497	3.5513	2.36067	1.12359	0.533162	0.314945	0.256064	0.0834881	-0.0678266
	3.44333	4.09531	3.01793	1.92954	1.11829	0.60258	0.363374	0.16508	-0.0551133	3.55027	2.36301	1.11947	0.529491	0.319237	0.249096	0.0850366	-0.0676324
	3.44667	4.09636	3.01943	1.93274	1.11299	0.598473	0.359963	0.164376	-0.0530682	3.55283	2.35949	1.12524	0.532418	0.317319	0.252442	0.0811318	-0.0654093
	3.45	4.09035	3.02225	1.93435	1.11319	0.602345	0.361624	0.162943	-0.0541503	3.55744	2.36707	1.12473	0.529648	0.316291	0.2522	0.0833906	-0.068858
	3.45333	4.09367	3.02392	1.93613	1.11826	0.597163	0.359157	0.160074	-0.0515366	3.55533	2.36272	1.12237	0.532815	0.318253	0.252168	0.0869337	-0.0701004
	3.45667	4.09694	3.02345	1.93262	1.11513	0.601332	0.368069	0.163653	-0.051802	3.55856	2.37037	1.12052	0.532703	0.315772	0.254813	0.0841521	-0.0652447
	3.46	4.09384	3.01795	1.9347	1.11804	0.603041	0.36333	0.164246	-0.0529488	3.56249	2.36916	1.12224	0.538222	0.314579	0.248392	0.084787	-0.0683998
	3.46333	4.09516	3.02252	1.93288	1.11687	0.600766	0.364893	0.164414	-0.0565669	3.55355	2.36605	1.12326	0.531606	0.314429	0.254211	0.0866187	-0.0662636
	3.46667	4.10012	3.02384	1.93638	1.1195	0.601147	0.366451	0.162491	-0.0552536	3.56235	2.37071	1.12542	0.531978	0.312007	0.252443	0.0825502	-0.0707042
	3.47	4.10206	3.0267	1.9379	1.11959	0.601052	0.364375	0.162393	-0.0512742	3.56199	2.37184	1.1216	0.532792	0.316157	0.247909	0.091667	-0.0675861
	3.47333	4.10209	3.029	1.9352	1.11925	0.601721	0.365376	0.165717	-0.0534958	3.56119	2.36741	1.12484	0.53379	0.316801	0.252029	0.0823241	-0.0685209
	3.47667	4.10238	3.02485	1.93758	1.11912	0.602812	0.363066	0.1602	-0.0563269	3.55972	2.37168	1.12555	0.535896	0.31402	0.250107	0.0893191	-0.0697615
	3.48	4.10359	3.0267	1.93893	1.11777	0.601088	0.366398	0.158761	-0.054139	3.56386	2.37137	1.12597	0.536445	0.315981	0.249918	0.08799	-0.0660328
	3.48333	4.10659	3.02971	1.94069	1.11954	0.6015	0.366035	0.16527	-0.0561495	3.56017	2.37381	1.12722	0.5335	0.313381	0.253978	0.089176	-0.0632495
	3.48667	4.09854	3.02894	1.93495	1.12134	0.603035	0.363299	0.162529	-0.0557444	3.56615	2.37746	1.12487	0.532074	0.314313	0.251282	0.0861611	-0.0701781
	3.49	4.10179	3.03398	1.93615	1.11827	0.601549	0.364976	0.163024	-0.0552556	3.56472	2.37343	1.12956	0.532909	0.315807	0.253226	0.0845973	-0.0662163
	3.49333	4.10651	3.03448	1.94204	1.11645	0.602354	0.363391	0.160798	-0.0547694	3.56441	2.3773	1.12852	0.530938	0.314787	0.252002	0.0835204	-0.0697404
	3.49667	4.1024	3.03082	1.94214	1.12169	0.600895	0.362337	0.16203	-0.0574668	3.56554	2.3759	1.12687	0.533379	0.316417	0.25201	0.086167	-0.0659887
	3.5	4.1089	3.03798	1.94926	1.12433	0.60057	0.362559	0.162263	-0.0513163	3.56444	2.3773	1.12626	0.537112	0.314155	0.251767	0.0868369	-0.0679701
	3.50333	4.10717	3.03194	1.94214	1.12002	0.601405	0.366111	0.161372	-0.0515888	3.56923	2.37728	1.13409	0.532289	0.317322	0.252586	0.0858549	-0.0663575
	3.50667	4.1093	3.0317	1.94459	1.11833	0.602628	0.36705	0.161621	-0.0596873	3.56626	2.38289	1.13073	0.533489	0.315365	0.252472	0.086091	-0.069318
	3.51	4.10573	3.03684	1.94466	1.1236	0.606417	0.365865	0.163664	-0.0552138	3.56719	2.37864	1.13387	0.53586	0.318368	0.25332	0.0882074	-0.0673541
	3.51333	4.10541	3.0353	1.94276	1.12	0.601257	0.367371	0.16306	-0.0559145	3.5714	2.37948	1.12853	0.536059	0.314389	0.249995	0.0842221	-0.0668141
	3.51667	4.10673	3.03514	1.94543	1.1215	0.602709	0.36621	0.161161	-0.0522199	3.56633	2.38041	1.13002	0.539612	0.317397	0.250854	0.0837996	-0.0696539
	3.52	4.11336	3.03062	1.94536	1.12509	0.606004	0.368236	0.163763	-0.0541174	3.56888	2.38726	1.13288	0.535841	0.316888	0.248238	0.0848853	-0.065749
	3.52333	4.11259	3.03719	1.9501	1.12393	0.605201	0.362157	0.162686	-0.0539167	3.57214	2.3854	1.13483	0.536203	0.318118	0.252501	0.0834553	-0.0719766
	3.52667	4.10953	3.04154	1.94805	1.12319	0.603258	0.362274	0.161981	-0.056745	3.57389	2.38759	1.13342	0.533728	0.316403	0.254293	0.0832675	-0.0720374
	3.53	4.10562	3.04385	1.95282	1.1252	0.602102	0.363924	0.160686	-0.0566163	3.56973	2.39018	1.12858	0.536723	0.32046	0.251435	0.0881156	-0.0683392
	3.53333	4.11159	3.04119	1.95023	1.12486	0.605274	0.36398	0.16031	-0.0531145	3.57253	2.38403	1.13236	0.534858	0.314203	0.252835	0.0860748	-0.0674667
	3.53667	4.1122	3.03754	1.95426	1.12531	0.60522	0.36361	0.160769	-0.0552861	3.5717	2.39413	1.13492	0.537033	0.321656	0.250818	0.0845753	-0.0695929
	3.54	4.11064	3.03971	1.95199	1.12438	0.606195	0.368322	0.165455	-0.0503424	3.5749	2.38976	1.13215	0.532687	0.317994	0.253035	0.0869702	-0.0663682
	3.54333	4.11692	3.04209	1.95172	1.12618	0.603616	0.366406	0.164999	-0.054585	3.57972	2.39119	1.13564	0.536998	0.320452	0.253231	0.0853646	-0.064276
	3.54667	4.11716	3.04736	1.95192	1.12739	0.603142	0.368668	0.163401	-0.0568458	3.57412	2.38799	1.13227	0.534433	0.318727	0.252122	0.0844816	-0.0709327
	3.55	4.11661	3.04366	1.95366	1.12555	0.605085	0.364591	0.163642	-0.0558256	3.58059	2.39041	1.13373	0.539474	0.3139	0.249801	0.0866786	-0.0682355
	3.55333	4.12108	3.04399	1.95372	1.13	0.603117	0.367716	0.166428	-0.0530073	3.58145	2.39239	1.13843	0.536865	0.315372	0.252914	0.0847819	-0.066817
	3.55667	4.11456	3.0469	1.95295	1.12604	0.603557	0.363775	0.158419	-0.057426	3.57971	2.39362	1.13935	0.535712	0.319163	0.253736	0.083667	-0.0688278
	3.56	4.11674	3.04674	1.95694	1.12377	0.605163	0.369533	0.164882	-0.0560865	3.57863	2.38936	1.13699	0.537285	0.316273	0.248153	0.0837581	-0.0740632
	3.56333	4.12042	3.04748	1.95703	1.12644	0.604676	0.368791	0.163632	-0.056197	3.58425	2.39384	1.13617	0.540916	0.315772	0.249846	0.0839408	-0.067088
	3.56667	4.11725	3.04718	1.96225	1.12837	0.604351	0.362513	0.163046	-0.0516512	3.58164	2.39194	1.13572	0.537004	0.316565	0.250184	0.0850133	-0.0693366
	3.57	4.11947	3.05032	1.95651	1.12892	0.606947	0.365763	0.160951	-0.0571501	3.58201	2.39956	1.13899	0.536989	0.316232	0.254263	0.0878488	-0.0670459
	3.57333	4.12295	3.04922	1.96093	1.12967	0.607283	0.363374	0.165059	-0.0552672	3.58318	2.39941	1.14535	0.538402	0.315121	0.251297	0.0864738	-0.0693551
	3.57667	4.12477	3.05165	1.95538	1.12941	0.602572	0.364072	0.162061	-0.0618702	3.58276	2.39781	1.13845	0.538154	0.317288	0.25348	0.0883026	-0.0701321
	3.58	4.12455	3.04961	1.95881	1.12679	0.60534	0.365035	0.161466	-0.0538008	3.58548	2.39886	1.13905	0.537381	0.316361	0.251682	0.0843252	-0.0692404
	3.58333	4.12554	3.05257	1.9596	1.12734	0.603484	0.365643	0.158334	-0.0565051	3.58516	2.40106	1.14511	0.536766	0.314294	0.248217	0.088472	-0.0696003
	3.58667	4.12273	3.05241	1.96178	1.13291	0.603436	0.366865	0.160589	-0.0570429	3.58513	2.40053	1.14101	0.53653	0.312133	0.253309	0.0858822	-0.0677883
	3.59	4.12273	3.0559	1.96314	1.12985	0.599816	0.359341	0.162266	-0.0585926	3.58903	2.4024	1.13704	0.540775	0.312376	0.255308	0.0829581	-0.067654
	3.59333	4.12723	3.05819	1.96009	1.12714	0.604053	0.366299	0.162505	-0.0529548	3.58422	2.40074	1.14156	0.532747	0.317428	0.250615	0.0891126	-0.0708162
	3.59667	4.13034	3.0564	1.96564	1.13145	0.606392	0.369703	0.161432	-0.0582898	3.58632	2.40056	1.14367	0.539653	0.316184	0.256132	0.0852945	-0.0679132
	3.6	4.12932	3.0582	1.96207	1.13	0.602037	0.365051	0.164161	-0.05475	3.58936	2.40848	1.13925	0.539396	0.31903	0.253325	0.0864102	-0.0742892
	3.60333	4.12319	3.05719	1.96711	1.12932	0.605292	0.366818	0.162859	-0.0561066	3.58946	2.40503	1.14391	0.536436	0.317485	0.24834	0.0840924	-0.0706084
	3.60667	4.1261	3.05772	1.96303	1.13202	0.608269	0.362876	0.161584	-0.056783	3.59138	2.40245	1.14247	0.542599	0.318493	0.252355	0.0856395	-0.0724624
	3.61	4.12696	3.06117	1.96722	1.12885	0.605536	0.365862	0.16296	-0.0598976	3.5949	2.40539	1.14191	0.538326	0.317656	0.255337	0.086258	-0.068187
	3.61333	4.13438	3.06042	1.96356	1.12657	0.605584	0.365714	0.160896	-0.0544481	3.58924	2.40759	1.14059	0.533836	0.317111	0.252776	0.0850466	-0.0730733
	3.61667	4.13073	3.06086	1.96938	1.13292	0.609942	0.366633	0.160223	-0.0548062	3.59499	2.40635	1.14448	0.536924	0.317495	0.251883	0.0842334	-0.0673263
	3.62	4.13345	3.06173	1.97065	1.13504	0.604017	0.368037	0.161438	-0.0629731	3.5954	2.40836	1.14491	0.53484	0.317108	0.250063	0.0844439	-0.0700753
	3.62333	4.13098	3.06144	1.96651	1.1364	0.604465	0.366445	0.161708	-0.0589854	3.5946	2.40802	1.14593	0.539731	0.314496	0.251152	0.087267	-0.0646334
	3.62667	4.13797	3.06172	1.96681	1.13295	0.608536	0.366296	0.164262	-0.0551234	3.59853	2.40772	1.14612	0.540535	0.313425	0.248102	0.0842538	-0.0710008
	3.63	4.12893	3.06345	1.97102	1.13231	0.605061	0.364192	0.161792	-0.0566101	3.59628	2.41234	1.14561	0.537766	0.317891	0.2507	0.0834495	-0.0691347
	3.63333	4.13323	3.06548	1.97085	1.13567	0.606114	0.36425	0.162214	-0.0519313	3.59739	2.41127	1.14435	0.538402	0.315174	0.2522	0.0860967	-0.066629
	3.63667	4.13314	3.06306	1.96943	1.13774	0.603305	0.363041	0.161183	-0.0564537	3.59549	2.4139	1.14689	0.537707	0.320143	0.249992	0.0836329	-0.0678735
	3.64	4.13376	3.0654	1.97053	1.1374	0.604542	0.370085	0.163028	-0.059913	3.5976	2.41413	1.14569	0.539733	0.314826	0.252332	0.0846453	-0.0710059
	3.64333	4.13564	3.06804	1.96792	1.13454	0.604727	0.368114	0.164577	-0.0538522	3.5985	2.41583	1.14781	0.536997	0.314061	0.253893	0.0857084	-0.068366
	3.64667	4.13593	3.06849	1.97229	1.13518	0.606957	0.365897	0.162462	-0.0569623	3.59942	2.41503	1.14255	0.541126	0.319341	0.251652	0.0806818	-0.0695308
	3.65	4.13483	3.07212	1.9706	1.13603	0.60513	0.367947	0.159763	-0.0592717	3.59634	2.41755	1.14749	0.540718	0.316966	0.251574	0.0859234	-0.0752575
	3.65333	4.1314	3.06877	1.97447	1.13423	0.606704	0.366755	0.160019	-0.0598021	3.6024	2.41789	1.15095	0.536295	0.317216	0.251717	0.0861587	-0.0711525
	3.65667	4.1371	3.06852	1.97742	1.14119	0.608275	0.363854	0.163746	-0.0559144	3.59996	2.41495	1.15303	0.542202	0.316204	0.253852	0.0892987	-0.0680799
	3.66	4.13781	3.06913	1.97625	1.13862	0.607355	0.367738	0.161493	-0.0612502	3.60433	2.41759	1.14711	0.540028	0.31907	0.251286	0.0871446	-0.071399
	3.66333	4.13809	3.07533	1.97382	1.14103	0.602848	0.369625	0.163463	-0.0616428	3.602	2.41755	1.14995	0.542171	0.316122	0.251772	0.0887341	-0.073089
	3.66667	4.14194	3.07169	1.97866	1.13646	0.612115	0.366479	0.159715	-0.0562479	3.60033	2.41904	1.15241	0.536281	0.314456	0.252134	0.086199	-0.0685624
	3.67	4.14165	3.07445	1.9719	1.13825	0.609844	0.365685	0.163835	-0.0585357	3.60524	2.42196	1.15105	0.537977	0.318481	0.25218	0.0828695	-0.0739383
	3.67333	4.14018	3.07549	1.97618	1.13954	0.610525	0.369319	0.158152	-0.0618988	3.60108	2.42491	1.1542	0.535155	0.31541	0.250999	0.0831803	-0.0729539
	3.67667	4.14195	3.07643	1.97829	1.1365	0.608753	0.367034	0.158997	-0.0576428	3.60349	2.4253	1.15041	0.539909	0.316648	0.252046	0.0830756	-0.0690948
	3.68	4.14403	3.07569	1.97615	1.13906	0.604854	0.370145	0.159914	-0.0555481	3.60243	2.4219	1.1521	0.539344	0.314411	0.255071	0.085643	-0.0701055
	3.68333	4.14177	3.07595	1.97247	1.14209	0.607999	0.368814	0.162609	-0.0575342	3.60646	2.42399	1.15549	0.541167	0.315851	0.246611	0.0828059	-0.0732151
	3.68667	4.1447	3.07419	1.98018	1.14368	0.609027	0.37319	0.160458	-0.0585049	3.60792	2.42385	1.15238	0.539554	0.319011	0.250746	0.0864028	-0.0732174
	3.69	4.14541	3.08167	1.98077	1.1391	0.609519	0.366799	0.16252	-0.0551022	3.61304	2.42758	1.15235	0.542541	0.317338	0.253571	0.0867679	-0.068562
	3.69333	4.1442	3.08229	1.9779	1.14228	0.608559	0.369206	0.160729	-0.0589247	3.60552	2.42676	1.1551	0.541806	0.312053	0.25109	0.0906021	-0.0683896
	3.69667	4.14328	3.07887	1.98188	1.14469	0.612763	0.368188	0.166733	-0.0546794	3.61621	2.42612	1.15572	0.539044	0.317416	0.252036	0.0811033	-0.0745253
	3.7	4.14579	3.07965	1.98434	1.14416	0.607477	0.372145	0.160201	-0.0596786	3.60979	2.42688	1.15331	0.536345	0.314019	0.25232	0.0800055	-0.0675504
	3.70333	4.15075	3.0825	1.98381	1.14349	0.607516	0.37064	0.16393	-0.0602313	3.6106	2.42528	1.15357	0.536729	0.314977	0.252699	0.0847733	-0.0723163
	3.70667	4.14514	3.08007	1.98312	1.14299	0.609464	0.366899	0.163958	-0.0592629	3.61163	2.43307	1.15486	0.538812	0.314342	0.248782	0.085003	-0.0697841
	3.71	4.14644	3.0824	1.98283	1.14129	0.607943	0.366989	0.164237	-0.0553092	3.61107	2.43286	1.15488	0.541063	0.317522	0.252644	0.0860469	-0.0688334
	3.71333	4.14647	3.08242	1.98375	1.14433	0.608124	0.37084	0.161946	-0.0586084	3.61278	2.42733	1.15445	0.542826	0.316534	0.247928	0.0838344	-0.0713052
	3.71667	4.14789	3.08502	1.98418	1.13498	0.608096	0.364896	0.165151	-0.057369	3.61679	2.43332	1.1564	0.53973	0.314518	0.255458	0.0862634	-0.0768672
	3.72	4.14943	3.08589	1.99268	1.14316	0.608324	0.368091	0.162366	-0.0574341	3.61607	2.43385	1.15799	0.542043	0.314586	0.252387	0.0882542	-0.0716016
	3.72333	4.14953	3.08527	1.98746	1.14565	0.60943	0.364962	0.163776	-0.0604879	3.61132	2.43398	1.15563	0.540601	0.315551	0.251146	0.0851616	-0.0716792
	3.72667	4.14833	3.09016	1.98384	1.14713	0.608101	0.369635	0.160405	-0.0634603	3.61792	2.43869	1.15796	0.541855	0.320004	0.250432	0.0846738	-0.0730905
	3.73	4.14908	3.08662	1.98699	1.13991	0.611219	0.368681	0.166082	-0.0576707	3.62144	2.43632	1.15684	0.53933	0.317004	0.248044	0.0873506	-0.073956
	3.73333	4.15203	3.09181	1.99177	1.14525	0.613534	0.368252	0.163627	-0.055387	3.61478	2.443	1.15466	0.546195	0.313319	0.249353	0.0890482	-0.0762987
	3.73667	4.15241	3.09031	1.98825	1.14054	0.609183	0.368821	0.16644	-0.0592241	3.61314	2.4358	1.15904	0.540333	0.315036	0.249068	0.0890694	-0.0707163
	3.74	4.15776	3.0868	1.98744	1.14023	0.609683	0.366547	0.162596	-0.0592715	3.61878	2.44007	1.16387	0.542984	0.319699	0.249101	0.0840157	-0.0736105
	3.74333	4.15581	3.08858	1.99411	1.14636	0.608724	0.368658	0.164508	-0.0560992	3.62002	2.43862	1.16512	0.543803	0.319705	0.249704	0.0855084	-0.07429
	3.74667	4.15417	3.0916	1.98826	1.14615	0.610039	0.367518	0.164775	-0.0597726	3.62293	2.43952	1.16221	0.542322	0.318399	0.249766	0.0841579	-0.0725974
	3.75	4.15027	3.09689	1.99217	1.14661	0.60785	0.369594	0.166188	-0.0580347	3.6243	2.43831	1.16252	0.54557	0.312064	0.25041	0.0853141	-0.0739311
	3.75333	4.15245	3.09336	1.98905	1.15077	0.610809	0.371964	0.169761	-0.0602921	3.62215	2.44365	1.15825	0.545215	0.314598	0.253285	0.0864259	-0.0744821
	3.75667	4.15784	3.09862	1.99135	1.14955	0.610509	0.367816	0.161945	-0.0618666	3.62623	2.43901	1.16023	0.543218	0.316549	0.252952	0.0870708	-0.0731303
	3.76	4.15391	3.09127	1.9943	1.14539	0.610731	0.369084	0.163165	-0.0601608	3.62145	2.44459	1.16348	0.540608	0.317247	0.250841	0.0864992	-0.0750685
	3.76333	4.15542	3.1	1.99478	1.15001	0.609852	0.366086	0.163977	-0.0608458	3.62346	2.44322	1.16177	0.543369	0.320183	0.250808	0.0864417	-0.0716067
	3.76667	4.15553	3.09643	1.99643	1.1486	0.608846	0.371265	0.165915	-0.0607339	3.62405	2.44635	1.16439	0.545023	0.316131	0.255392	0.086876	-0.0711406
	3.77	4.15482	3.09887	1.99774	1.14474	0.607701	0.368638	0.162793	-0.0620763	3.62314	2.4455	1.16085	0.539904	0.311231	0.251081	0.0797539	-0.072774
	3.77333	4.1603	3.0955	1.99753	1.15098	0.611547	0.370578	0.163055	-0.0559524	3.62878	2.44946	1.15964	0.540185	0.3133	0.251994	0.0841042	-0.0756178
	3.77667	4.15933	3.09601	2.00126	1.14939	0.613477	0.367555	0.16161	-0.0624844	3.62328	2.44656	1.162	0.543834	0.315971	0.251795	0.0822241	-0.0757912
	3.78	4.15677	3.10093	2.00074	1.14818	0.612381	0.370887	0.16357	-0.0589883	3.6227	2.44855	1.16616	0.539411	0.315607	0.253073	0.0812925	-0.0732508
	3.78333	4.15749	3.10012	2.00019	1.14699	0.614495	0.36599	0.160978	-0.0584458	3.62641	2.44742	1.16659	0.544647	0.321068	0.251919	0.0842294	-0.0779216
	3.78667	4.16103	3.10214	1.99573	1.14709	0.615649	0.369107	0.160543	-0.0610684	3.62465	2.4477	1.16563	0.545653	0.313696	0.255664	0.0836458	-0.0759823
	3.79	4.16179	3.10252	2.0001	1.14787	0.609011	0.367097	0.166512	-0.0596128	3.6232	2.45035	1.16805	0.545348	0.316961	0.249794	0.0857278	-0.0745185
	3.79333	4.1626	3.10628	2.00178	1.14855	0.612175	0.368882	0.164429	-0.0546293	3.62609	2.45045	1.16875	0.542929	0.316197	0.251837	0.0821677	-0.0734064
	3.79667	4.16489	3.10076	2.00015	1.15086	0.614718	0.366971	0.165376	-0.0566381	3.63003	2.45312	1.16352	0.543904	0.316894	0.253216	0.0838545	-0.0726959
	3.8	4.16297	3.10335	1.99832	1.14986	0.609953	0.370202	0.164419	-0.0621256	3.63661	2.45675	1.16766	0.544104	0.312846	0.254168	0.0821522	-0.0710309
	3.80333	4.16985	3.10188	2.00375	1.15101	0.611254	0.367787	0.165593	-0.059879	3.62985	2.45398	1.16868	0.540269	0.317491	0.251683	0.0871284	-0.075354
	3.80667	4.16722	3.10231	2.0028	1.15306	0.612594	0.371427	0.162807	-0.0604544	3.63374	2.45408	1.16484	0.543103	0.315616	0.251561	0.0835268	-0.0703167
	3.81	4.16397	3.09973	2.00515	1.1462	0.611918	0.371163	0.160789	-0.0600744	3.63158	2.45653	1.16948	0.545801	0.316224	0.252025	0.083112	-0.0773203
	3.81333	4.16519	3.11318	2.00357	1.15564	0.61392	0.369105	0.164578	-0.0600709	3.6346	2.4556	1.16972	0.540185	0.319874	0.252889	0.0858077	-0.0744824
	3.81667	4.16962	3.10968	2.00664	1.1544	0.613052	0.36911	0.161483	-0.0596344	3.63208	2.45882	1.17022	0.545382	0.312796	0.251517	0.0850627	-0.0755557
	3.82	4.16826	3.10557	2.00818	1.14872	0.612701	0.365745	0.163469	-0.0570638	3.63528	2.45778	1.16736	0.549532	0.319523	0.254942	0.0850559	-0.073746
	3.82333	4.17157	3.1031	2.0051	1.15536	0.615629	0.370775	0.166161	-0.0639819	3.63643	2.45616	1.16939	0.543572	0.31557	0.252691	0.0879233	-0.0729902
	3.82667	4.16851	3.11326	2.00732	1.15328	0.615648	0.368424	0.163047	-0.0589829	3.63619	2.46215	1.17334	0.541308	0.317598	0.256683	0.0830476	-0.0719197
	3.83	4.17291	3.11382	2.00609	1.15524	0.611306	0.368366	0.164989	-0.0619358	3.63828	2.46008	1.16666	0.544411	0.31514	0.255256	0.0815258	-0.0774374
	3.83333	4.17067	3.10924	2.01054	1.15431	0.61624	0.366861	0.162464	-0.0639425	3.63779	2.46119	1.17378	0.545414	0.316222	0.254807	0.0838619	-0.0728866
	3.83667	4.17028	3.1092	2.00791	1.15565	0.611871	0.372089	0.161022	-0.0614761	3.63896	2.46385	1.17404	0.544402	0.320981	0.255437	0.0886034	-0.072873
	3.84	4.16775	3.1143	2.00834	1.15348	0.614002	0.373738	0.163268	-0.0631083	3.63881	2.46317	1.17186	0.546172	0.318455	0.250178	0.0855269	-0.0744821
	3.84333	4.17276	3.11169	2.00635	1.15399	0.612462	0.365875	0.162459	-0.0633962	3.63911	2.46493	1.17207	0.540342	0.314218	0.249331	0.0840931	-0.0717246
	3.84667	4.17507	3.11359	2.01127	1.15127	0.615953	0.362591	0.164442	-0.0598535	3.63713	2.46734	1.17216	0.545395	0.319524	0.250349	0.0836049	-0.0702381
	3.85	4.17194	3.11517	2.01118	1.15349	0.6137	0.371304	0.163888	-0.0605913	3.64215	2.46855	1.17514	0.547919	0.317133	0.250217	0.0864286	-0.0741011
	3.85333	4.17252	3.1137	2.01019	1.15672	0.610428	0.367455	0.165196	-0.0624207	3.64018	2.46515	1.17538	0.544467	0.317312	0.251706	0.0880567	-0.0699301
	3.85667	4.17108	3.11817	2.01269	1.15627	0.614755	0.368211	0.163095	-0.0616586	3.64112	2.46807	1.1726	0.545858	0.320004	0.253082	0.0860333	-0.0756165
	3.86	4.17149	3.11575	2.01146	1.15812	0.618709	0.36876	0.163459	-0.0639023	3.64972	2.46704	1.17431	0.547685	0.316436	0.251059	0.084355	-0.0748231
	3.86333	4.17163	3.11645	2.0148	1.1608	0.616699	0.371683	0.163679	-0.0590016	3.64411	2.4692	1.17414	0.540336	0.317684	0.251738	0.0846047	-0.0730608
	3.86667	4.17411	3.11821	2.0124	1.16002	0.615158	0.368981	0.16256	-0.0625365	3.64812	2.4685	1.17164	0.543585	0.315957	0.252172	0.0875951	-0.0756658
	3.87	4.17845	3.12018	2.01578	1.15727	0.616712	0.366045	0.159254	-0.0617679	3.64326	2.46882	1.17706	0.549798	0.319403	0.248975	0.0843574	-0.0766686
	3.87333	4.17989	3.11945	2.0157	1.15903	0.614435	0.369667	0.163319	-0.0606044	3.64833	2.47209	1.17688	0.543712	0.321891	0.255419	0.0848955	-0.0726798
	3.87667	4.17636	3.12038	2.01202	1.15721	0.61124	0.37159	0.162439	-0.0597886	3.64235	2.46929	1.17719	0.544645	0.316872	0.251606	0.0849601	-0.0734994
	3.88	4.17828	3.12224	2.02215	1.15551	0.617226	0.365794	0.163691	-0.061615	3.64765	2.47337	1.17567	0.547623	0.321262	0.255829	0.0825949	-0.071387
	3.88333	4.17979	3.12063	2.0168	1.16315	0.614269	0.371675	0.163929	-0.0619188	3.64822	2.47613	1.17792	0.545231	0.317844	0.251331	0.0830687	-0.0779396
	3.88667	4.17396	3.12276	2.01537	1.15918	0.616653	0.371332	0.163031	-0.0619683	3.64534	2.47389	1.18045	0.546525	0.318136	0.250008	0.0863637	-0.0745692
	3.89	4.17984	3.12278	2.01946	1.1607	0.615312	0.370452	0.160537	-0.0662542	3.64958	2.47457	1.17843	0.548401	0.317086	0.253934	0.0872531	-0.0747384
	3.89333	4.18437	3.12918	2.0188	1.16553	0.617039	0.375246	0.166495	-0.0640919	3.64585	2.47556	1.1775	0.546056	0.321344	0.253414	0.0802918	-0.074402
	3.89667	4.18282	3.12631	2.01961	1.15567	0.613019	0.372508	0.160462	-0.0607923	3.6457	2.47675	1.17943	0.543393	0.314801	0.254611	0.086493	-0.076055
	3.9	4.18315	3.12773	2.01838	1.162	0.61309	0.36833	0.162118	-0.0598686	3.65357	2.47741	1.1802	0.543641	0.318451	0.249801	0.0802772	-0.0733343
	3.90333	4.17933	3.13053	2.02486	1.16416	0.612794	0.370045	0.163265	-0.0634567	3.65257	2.47998	1.18019	0.540633	0.314601	0.253179	0.0898224	-0.0773275
	3.90667	4.18079	3.12589	2.01957	1.16526	0.614011	0.370672	0.161573	-0.0626361	3.65047	2.47819	1.18201	0.542502	0.314434	0.254966	0.0835029	-0.0753623
	3.91	4.17912	3.12581	2.01752	1.16119	0.612011	0.372283	0.165286	-0.0613956	3.64912	2.47769	1.18225	0.545323	0.314037	0.252691	0.0850113	-0.075822
	3.91333	4.18212	3.12662	2.0214	1.15969	0.618463	0.370069	0.160285	-0.0639491	3.65398	2.48226	1.18136	0.547907	0.318672	0.253594	0.0843735	-0.0744311
	3.91667	4.18368	3.12701	2.01955	1.16204	0.61478	0.36947	0.165327	-0.060589	3.64856	2.47925	1.17964	0.547999	0.320633	0.25168	0.0839294	-0.0738876
	3.92	4.18984	3.13051	2.02546	1.16363	0.612819	0.367806	0.16602	-0.0635155	3.65467	2.47958	1.18126	0.551877	0.318983	0.249885	0.0866945	-0.074692
	3.92333	4.18474	3.13452	2.02182	1.1638	0.61491	0.375516	0.162169	-0.0668814	3.65685	2.48762	1.18317	0.553444	0.319571	0.253931	0.0836294	-0.0751918
	3.92667	4.18556	3.13503	2.01978	1.16472	0.615676	0.37343	0.162219	-0.0614265	3.65425	2.48301	1.18091	0.545015	0.320016	0.256045	0.0895659	-0.0757754
	3.93	4.18614	3.12997	2.03074	1.16599	0.612684	0.369833	0.165387	-0.0607171	3.65494	2.48336	1.18344	0.550121	0.31842	0.249781	0.0840633	-0.0715607
	3.93333	4.18747	3.13111	2.02952	1.16311	0.616431	0.373663	0.159562	-0.0636625	3.65887	2.48895	1.18846	0.547734	0.314113	0.247932	0.0870319	-0.0738823
	3.93667	4.18798	3.13921	2.02473	1.16614	0.61377	0.369998	0.158958	-0.0654174	3.65431	2.48347	1.18241	0.546247	0.31517	0.250217	0.0851263	-0.0725848
	3.94	4.18464	3.13579	2.02769	1.1654	0.61737	0.369967	0.162599	-0.0652892	3.66287	2.48784	1.18335	0.549319	0.31784	0.254993	0.0848466	-0.0782126
	3.94333	4.1872	3.13667	2.03004	1.16847	0.616792	0.374219	0.164278	-0.0622625	3.66084	2.48778	1.18861	0.549481	0.316879	0.252043	0.0880489	-0.0744809
	3.94667	4.18524	3.13327	2.02902	1.16506	0.615571	0.373694	0.164729	-0.0654077	3.65818	2.48857	1.1888	0.55091	0.3185	0.251482	0.0846326	-0.0790244
	3.95	4.19462	3.13525	2.02741	1.16995	0.614983	0.371773	0.161451	-0.0594543	3.66173	2.49148	1.18657	0.546721	0.314497	0.252022	0.0882201	-0.0743785
	3.95333	4.19131	3.13792	2.02953	1.16756	0.614358	0.374065	0.16191	-0.0610591	3.65896	2.48753	1.1828	0.548744	0.321366	0.254688	0.0835775	-0.0769279
	3.95667	4.18901	3.13963	2.02878	1.16392	0.616195	0.368056	0.160604	-0.0638893	3.65974	2.49286	1.18713	0.549924	0.315072	0.251916	0.0839845	-0.0761857
	3.96	4.19565	3.14026	2.03088	1.16465	0.615811	0.369403	0.162027	-0.0632239	3.66519	2.49001	1.18684	0.545351	0.31917	0.255086	0.0839589	-0.0783458
	3.96333	4.19497	3.14384	2.02746	1.16791	0.619257	0.370833	0.163837	-0.0625147	3.65984	2.48664	1.18541	0.549185	0.318533	0.250736	0.0877728	-0.0737936
	3.96667	4.19528	3.14069	2.03462	1.1616	0.618169	0.36916	0.160428	-0.0603956	3.65692	2.49403	1.18858	0.547255	0.316534	0.249929	0.0891261	-0.0772283
	3.97	4.1928	3.14503	2.03193	1.16379	0.614659	0.369748	0.164192	-0.0662085	3.66126	2.49288	1.1855	0.544304	0.320626	0.25476	0.0834733	-0.0765117
	3.97333	4.19217	3.14492	2.03604	1.16601	0.613617	0.374707	0.160614	-0.0653369	3.66675	2.49413	1.19032	0.548357	0.317385	0.252683	0.0846273	-0.0736549
	3.97667	4.19143	3.14691	2.03011	1.17005	0.616772	0.37474	0.161113	-0.0628962	3.66257	2.497	1.18814	0.548387	0.318692	0.256277	0.0860696	-0.0746103
	3.98	4.1914	3.14308	2.03056	1.16569	0.620221	0.370637	0.160064	-0.0636668	3.66737	2.49401	1.18848	0.54713	0.316545	0.254076	0.0861914	-0.0739975
	3.98333	4.19729	3.14504	2.03212	1.16704	0.618535	0.375554	0.165879	-0.0599689	3.66786	2.49874	1.19075	0.548403	0.318151	0.25084	0.0887084	-0.0769174
	3.98667	4.19441	3.14843	2.0372	1.17482	0.619739	0.370971	0.164542	-0.0629607	3.666	2.49956	1.19066	0.553792	0.317094	0.253215	0.082154	-0.0761712
	3.99	4.19747	3.14422	2.03234	1.17276	0.614817	0.373432	0.165318	-0.0655515	3.66572	2.49844	1.19115	0.549472	0.320316	0.249502	0.0815089	-0.0794952
	3.99333	4.19975	3.14722	2.03718	1.17182	0.613813	0.369525	0.161558	-0.0640264	3.66941	2.49388	1.19031	0.545995	0.31899	0.253591	0.0835699	-0.0765718
	3.99667	4.20177	3.15053	2.03628	1.16763	0.615284	0.370831	0.161938	-0.0630623	3.66904	2.49929	1.19528	0.547148	0.317614	0.248037	0.0824437	-0.0757381
	4	4.19678	3.14871	2.03655	1.17397	0.61445	0.373005	0.162399	-0.0613369	3.67026	2.50262	1.19455	0.550468	0.315812	0.252961	0.0875202	-0.0758773
	4.00333	4.19772	3.14703	2.03837	1.17212	0.617371	0.375346	0.160677	-0.0629443	3.66943	2.50333	1.19717	0.5454	0.318958	0.254505	0.0860786	-0.0768811
	4.00667	4.20282	3.14747	2.03544	1.17316	0.615189	0.369616	0.163249	-0.0612711	3.66661	2.50235	1.19681	0.5481	0.314454	0.251637	0.0824004	-0.0774646
	4.01	4.20125	3.14944	2.03829	1.16736	0.619731	0.374406	0.161717	-0.0628206	3.67137	2.50706	1.19302	0.5545	0.314354	0.248542	0.083243	-0.0747956
	4.01333	4.1991	3.15042	2.03601	1.17279	0.620314	0.370135	0.162056	-0.0623815	3.66822	2.50628	1.19297	0.550623	0.315392	0.25375	0.0863193	-0.0793528
	4.01667	4.19968	3.14969	2.04212	1.17619	0.617745	0.370152	0.162672	-0.062559	3.67419	2.50857	1.19126	0.55168	0.320269	0.251183	0.083721	-0.0768132
	4.02	4.20371	3.15158	2.03762	1.1732	0.616333	0.374234	0.163278	-0.0633747	3.66752	2.50214	1.1913	0.550599	0.317815	0.253525	0.0832834	-0.0798262
	4.02333	4.20766	3.15198	2.04339	1.171	0.619689	0.368094	0.16344	-0.0646802	3.67255	2.50531	1.19369	0.550802	0.317852	0.255497	0.0863995	-0.0768227
	4.02667	4.20369	3.15557	2.04456	1.17186	0.620183	0.373576	0.165174	-0.0650943	3.67256	2.51112	1.19755	0.547746	0.318949	0.253833	0.0858699	-0.0723229
	4.03	4.2067	3.15175	2.04455	1.17585	0.620586	0.373677	0.163227	-0.0652099	3.67427	2.50758	1.19549	0.550061	0.318833	0.25364	0.0865199	-0.076467
	4.03333	4.20316	3.1563	2.04026	1.17473	0.615643	0.367843	0.161812	-0.0624434	3.6712	2.51049	1.19464	0.548139	0.318008	0.251207	0.084756	-0.076772
	4.03667	4.20895	3.15677	2.04189	1.17345	0.621145	0.374967	0.164736	-0.0667542	3.6787	2.51118	1.19428	0.546209	0.322468	0.250031	0.0826919	-0.0758528
	4.04	4.2055	3.15688	2.04412	1.17551	0.618137	0.372611	0.164736	-0.06572	3.67731	2.50779	1.19708	0.547603	0.316723	0.254769	0.0901502	-0.0804965
	4.04333	4.20526	3.16043	2.04638	1.175	0.620858	0.369446	0.165022	-0.0648648	3.67771	2.51036	1.19733	0.550985	0.317034	0.252666	0.0824566	-0.0754336
	4.04667	4.20409	3.1577	2.04311	1.17305	0.622351	0.36907	0.164195	-0.0614617	3.67764	2.51295	1.19963	0.55115	0.319886	0.25403	0.082849	-0.0807339
	4.05	4.20903	3.15973	2.04312	1.17898	0.619611	0.37073	0.164808	-0.0597155	3.67964	2.51311	1.19713	0.550375	0.317483	0.252924	0.0856097	-0.0798398
	4.05333	4.20587	3.16274	2.04477	1.17854	0.61539	0.371362	0.163821	-0.0642825	3.67776	2.51685	1.19804	0.548567	0.316589	0.251892	0.0840279	-0.0747629
	4.05667	4.2064	3.15917	2.0469	1.1785	0.622465	0.371964	0.163387	-0.0625538	3.6809	2.51721	1.20096	0.551257	0.318634	0.252228	0.0848534	-0.0782113
	4.06	4.20994	3.15732	2.04902	1.17419	0.621523	0.375535	0.163591	-0.0657752	3.68103	2.51954	1.19888	0.554483	0.318528	0.256318	0.0849907	-0.0780458
	4.06333	4.21171	3.16236	2.04769	1.1734	0.621525	0.364897	0.163397	-0.0678399	3.67759	2.51498	1.19833	0.55475	0.317618	0.251389	0.0848647	-0.0791402
	4.06667	4.21257	3.16531	2.04848	1.17891	0.625354	0.36965	0.163206	-0.0635703	3.68096	2.51359	1.20028	0.550045	0.320318	0.247846	0.0797204	-0.0758875
	4.07	4.21134	3.16114	2.0478	1.17295	0.622999	0.370652	0.166483	-0.0628675	3.68282	2.51891	1.19973	0.551699	0.317635	0.254089	0.0859948	-0.0764365
	4.07333	4.21746	3.16246	2.05263	1.17631	0.620482	0.372702	0.168924	-0.0646409	3.68016	2.51395	1.20073	0.55186	0.316747	0.253146	0.0862218	-0.0771302
	4.07667	4.21436	3.16402	2.04953	1.17858	0.620788	0.368802	0.161949	-0.0569333	3.68324	2.51851	1.20304	0.550364	0.318831	0.252986	0.0860141	-0.0782225
	4.08	4.21456	3.16379	2.05323	1.17434	0.621165	0.372275	0.163773	-0.0621446	3.68651	2.52201	1.20072	0.552474	0.316898	0.250146	0.0850773	-0.0762842
	4.08333	4.20922	3.16584	2.05532	1.17564	0.619423	0.370716	0.162844	-0.063974	3.68705	2.51867	1.20311	0.550498	0.319944	0.256513	0.083857	-0.0791968
	4.08667	4.21372	3.16606	2.04801	1.17895	0.619492	0.369767	0.161262	-0.0623702	3.6887	2.52184	1.20255	0.554037	0.313582	0.252071	0.0847291	-0.0775224
	4.09	4.2113	3.16432	2.049	1.17684	0.620632	0.373757	0.164396	-0.0654935	3.68631	2.51703	1.20085	0.550755	0.319762	0.251773	0.0805995	-0.0779235
	4.09333	4.2089	3.16636	2.05113	1.18002	0.623918	0.369997	0.165384	-0.0669022	3.686	2.52103	1.20075	0.549704	0.317236	0.251491	0.0840057	-0.0785341
	4.09667	4.22028	3.16835	2.05431	1.17896	0.623848	0.3734	0.162897	-0.0688442	3.68652	2.52749	1.20423	0.555703	0.319209	0.251	0.0854039	-0.0803279
	4.1	4.21731	3.16725	2.05319	1.17888	0.621546	0.370864	0.164634	-0.061805	3.69217	2.52363	1.20456	0.552738	0.317727	0.253055	0.0867305	-0.0776393
	4.10333	4.21393	3.17079	2.05303	1.18074	0.621646	0.37254	0.160695	-0.0660624	3.68142	2.52499	1.20372	0.550762	0.315975	0.25585	0.0863585	-0.0799438
	4.10667	4.21743	3.16964	2.05552	1.17896	0.619792	0.371272	0.161117	-0.066619	3.68953	2.52846	1.20282	0.550716	0.315981	0.252954	0.0819827	-0.079348
	4.11	4.21513	3.16809	2.05622	1.17927	0.623524	0.368871	0.161491	-0.0650436	3.68456	2.52755	1.20446	0.551903	0.319045	0.250345	0.0840369	-0.0770307
	4.11333	4.21882	3.17401	2.05203	1.1842	0.621043	0.375915	0.159404	-0.0682483	3.6878	2.52618	1.20961	0.552983	0.3168	0.250345	0.0836625	-0.0804452
	4.11667	4.21879	3.17248	2.05735	1.18232	0.619253	0.371672	0.164146	-0.0645526	3.69044	2.5285	1.20935	0.551241	0.313854	0.249488	0.0853661	-0.0818844
	4.12	4.21754	3.17227	2.05741	1.18498	0.622484	0.373214	0.165432	-0.0647497	3.68609	2.52875	1.20769	0.552613	0.318489	0.256324	0.0856888	-0.0778475
	4.12333	4.2191	3.17642	2.05656	1.18056	0.623211	0.370655	0.162936	-0.0647656	3.69454	2.52985	1.20429	0.55461	0.320083	0.252812	0.0857084	-0.0779237
	4.12667	4.21412	3.17083	2.05684	1.18007	0.623761	0.371261	0.163027	-0.0696875	3.69296	2.52938	1.20823	0.553111	0.31545	0.252584	0.0830154	-0.0800257
	4.13	4.21853	3.17379	2.05679	1.18528	0.623457	0.375788	0.165151	-0.0636666	3.69316	2.53007	1.21107	0.55109	0.316332	0.248865	0.0859786	-0.0786747
	4.13333	4.21535	3.17644	2.06012	1.18181	0.620342	0.371462	0.163261	-0.0658591	3.6998	2.53206	1.20751	0.552966	0.317915	0.248208	0.0842579	-0.0797097
	4.13667	4.22256	3.17899	2.06281	1.18082	0.624006	0.372024	0.163717	-0.0661917	3.69314	2.52878	1.21024	0.547047	0.319335	0.251035	0.0860525	-0.0788746
	4.14	4.22306	3.17904	2.0621	1.18313	0.622673	0.373382	0.16397	-0.0600108	3.69448	2.53615	1.21127	0.554025	0.323428	0.252404	0.0843629	-0.0808605
	4.14333	4.2202	3.17757	2.06314	1.1876	0.625064	0.372774	0.161575	-0.0674622	3.69576	2.53063	1.21003	0.553548	0.322478	0.254185	0.0861046	-0.0807224
	4.14667	4.22029	3.17838	2.06137	1.18737	0.625911	0.370633	0.167104	-0.0639731	3.69462	2.53636	1.21543	0.556054	0.316186	0.251949	0.0825277	-0.0820767
	4.15	4.22578	3.17948	2.06672	1.18565	0.624267	0.372791	0.164619	-0.0611821	3.69126	2.53295	1.21016	0.552684	0.317317	0.250602	0.0836123	-0.0791895
	4.15333	4.22363	3.17782	2.06722	1.18231	0.621353	0.373516	0.166546	-0.0652201	3.69998	2.53308	1.21095	0.553009	0.31932	0.253686	0.081217	-0.0817016
	4.15667	4.22681	3.18255	2.0661	1.18514	0.621659	0.373703	0.166837	-0.0692083	3.69574	2.53425	1.21093	0.551935	0.319889	0.249161	0.0840483	-0.0809151
	4.16	4.22077	3.18145	2.06784	1.18394	0.621882	0.373992	0.159546	-0.0669822	3.70096	2.53666	1.21115	0.55335	0.316265	0.253973	0.0817073	-0.079662
	4.16333	4.22901	3.18417	2.06498	1.18492	0.621052	0.374424	0.162861	-0.0674881	3.70028	2.54244	1.21186	0.555863	0.318365	0.252617	0.0798131	-0.0769828
	4.16667	4.22954	3.18037	2.06572	1.18519	0.621793	0.369457	0.165162	-0.0645809	3.701	2.53854	1.21399	0.555336	0.321153	0.253275	0.0828496	-0.0782509
	4.17	4.22503	3.18519	2.06375	1.18087	0.622098	0.372179	0.16682	-0.0673653	3.69439	2.541	1.21015	0.55294	0.319969	0.253313	0.0846054	-0.0803496
	4.17333	4.23402	3.18415	2.06452	1.1874	0.625909	0.372258	0.160871	-0.069312	3.69751	2.54262	1.2132	0.555674	0.318941	0.251689	0.0845888	-0.0798207
	4.17667	4.2296	3.18725	2.06735	1.18505	0.626239	0.374458	0.166253	-0.06773	3.70011	2.54283	1.21248	0.555288	0.321811	0.253099	0.0841081	-0.0832401
	4.18	4.23304	3.18394	2.07011	1.18127	0.623618	0.372703	0.158902	-0.0631974	3.70281	2.54061	1.21388	0.550956	0.314916	0.253154	0.0814596	-0.0799509
	4.18333	4.22737	3.1847	2.07003	1.18314	0.622304	0.370383	0.163874	-0.0652425	3.70683	2.54071	1.21321	0.556549	0.318314	0.25532	0.0845055	-0.0821604
	4.18667	4.22832	3.18742	2.0702	1.19143	0.624095	0.375389	0.164588	-0.0651798	3.70316	2.54378	1.21232	0.553217	0.31467	0.249966	0.08231	-0.0818693
	4.19	4.23037	3.19076	2.06947	1.18633	0.623899	0.371587	0.16596	-0.0702872	3.69824	2.54177	1.21654	0.556587	0.314525	0.255292	0.0879576	-0.0801218
	4.19333	4.23128	3.19161	2.07523	1.19195	0.625144	0.371381	0.16041	-0.0652746	3.70723	2.54364	1.21813	0.556029	0.318686	0.251355	0.0818704	-0.0784706
	4.19667	4.23203	3.19205	2.06939	1.19211	0.623225	0.371561	0.163218	-0.0695957	3.70349	2.54424	1.21373	0.554854	0.317683	0.250266	0.0821683	-0.0795656
	4.2	4.23124	3.18586	2.07226	1.18634	0.623539	0.375421	0.164463	-0.0657117	3.70204	2.55371	1.21508	0.553605	0.319205	0.253996	0.084678	-0.0813351
	4.20333	4.23351	3.19297	2.07422	1.18901	0.624476	0.373765	0.166631	-0.0683611	3.70336	2.54871	1.21769	0.556486	0.317	0.252856	0.0796864	-0.077914
	4.20667	4.2322	3.19412	2.07396	1.1922	0.626083	0.375835	0.163068	-0.0654159	3.7055	2.54492	1.22008	0.556128	0.317333	0.253147	0.0847951	-0.0777052
	4.21	4.22932	3.19204	2.07285	1.18928	0.626253	0.375815	0.164419	-0.0674282	3.70765	2.55073	1.21658	0.553735	0.320946	0.253719	0.0830556	-0.0795369
	4.21333	4.23596	3.19656	2.07464	1.19087	0.625274	0.37168	0.160879	-0.0699357	3.70827	2.55024	1.22221	0.55383	0.317288	0.252392	0.0819959	-0.0834904
	4.21667	4.23966	3.19747	2.07327	1.19591	0.628277	0.377363	0.165352	-0.0703374	3.70723	2.55031	1.21968	0.55319	0.323399	0.255574	0.0853403	-0.0779432
	4.22	4.23735	3.1965	2.07552	1.18925	0.62177	0.37501	0.161668	-0.0664772	3.70896	2.5494	1.2181	0.554253	0.31764	0.254912	0.0847636	-0.0802254
	4.22333	4.23734	3.19188	2.07536	1.18916	0.629056	0.373856	0.167813	-0.0621648	3.70165	2.55376	1.21793	0.555598	0.319479	0.250472	0.0846976	-0.0793069
	4.22667	4.23377	3.19723	2.07711	1.19528	0.621302	0.374108	0.164433	-0.0696156	3.71062	2.55093	1.22026	0.558846	0.32322	0.250302	0.0841967	-0.0803994
	4.23	4.23788	3.19818	2.07426	1.19055	0.625536	0.374463	0.164577	-0.0651468	3.71019	2.55102	1.21915	0.556113	0.318804	0.255216	0.083828	-0.0783709
	4.23333	4.23974	3.19505	2.07869	1.19225	0.628012	0.373035	0.167469	-0.0658386	3.70813	2.55216	1.22362	0.5586	0.320107	0.252369	0.0859651	-0.0804933
	4.23667	4.24078	3.1967	2.07446	1.19514	0.626266	0.374999	0.163316	-0.0640267	3.71422	2.55591	1.22236	0.556205	0.321323	0.252054	0.0837629	-0.0836806
	4.24	4.24107	3.20225	2.07832	1.1958	0.624376	0.373047	0.161363	-0.0707199	3.71367	2.55452	1.22173	0.554469	0.315398	0.252101	0.0824505	-0.0831588
	4.24333	4.24094	3.19795	2.08361	1.19123	0.628906	0.374757	0.16349	-0.0686364	3.71367	2.55562	1.22669	0.553072	0.320109	0.251291	0.0794531	-0.0790807
	4.24667	4.23681	3.20319	2.08106	1.19368	0.624326	0.375455	0.160733	-0.0665667	3.71046	2.56018	1.22102	0.558181	0.322932	0.252656	0.0873556	-0.0806046
	4.25	4.24424	3.1992	2.07438	1.19693	0.628455	0.376444	0.163356	-0.0696713	3.71683	2.55908	1.22284	0.558413	0.319306	0.252697	0.0838655	-0.0838845
	4.25333	4.24208	3.19946	2.0795	1.19221	0.625617	0.371731	0.161546	-0.0676013	3.71244	2.55404	1.22167	0.558063	0.318827	0.252924	0.0882091	-0.0825147
	4.25667	4.245	3.20181	2.08024	1.19723	0.625145	0.373567	0.166266	-0.0663328	3.71777	2.55346	1.22536	0.558234	0.31882	0.252178	0.0851374	-0.0782549
	4.26	4.23867	3.19964	2.08215	1.19145	0.625598	0.375588	0.162745	-0.0678911	3.71664	2.55885	1.22365	0.557526	0.31792	0.255196	0.0844188	-0.0842251
	4.26333	4.24123	3.20427	2.08067	1.19349	0.622142	0.374288	0.16482	-0.0719342	3.713	2.56323	1.22004	0.553846	0.319235	0.250042	0.0834643	-0.0788574
	4.26667	4.2463	3.20241	2.08557	1.1958	0.626818	0.374053	0.164749	-0.0718777	3.71849	2.55813	1.22466	0.558269	0.319864	0.25509	0.0855716	-0.0826878
	4.27	4.2388	3.20535	2.08248	1.19683	0.625053	0.377948	0.164903	-0.0707451	3.71471	2.56396	1.22388	0.555343	0.31905	0.253545	0.0800779	-0.0824911
	4.27333	4.24472	3.20209	2.08571	1.19522	0.626606	0.374003	0.164434	-0.0699105	3.71964	2.56693	1.22317	0.559007	0.316754	0.250584	0.0827141	-0.0783818
	4.27667	4.24628	3.20416	2.08571	1.19735	0.629203	0.370154	0.163445	-0.0702776	3.71388	2.56005	1.22574	0.555093	0.317875	0.248728	0.0851006	-0.0802433
	4.28	4.24542	3.20736	2.08444	1.19552	0.626027	0.376123	0.167391	-0.0713629	3.71976	2.56595	1.22732	0.557986	0.318287	0.255593	0.087252	-0.0830296
	4.28333	4.24683	3.20723	2.08753	1.19965	0.628349	0.376648	0.162577	-0.0680563	3.72058	2.56269	1.22538	0.5554	0.317724	0.256077	0.0860792	-0.0793989
	4.28667	4.24527	3.21166	2.08595	1.19828	0.621125	0.374997	0.165283	-0.0656839	3.72053	2.56482	1.22979	0.557861	0.316646	0.252769	0.087645	-0.0766935
	4.29	4.25116	3.21191	2.08583	1.20221	0.626902	0.376918	0.16806	-0.0659891	3.71794	2.56603	1.22822	0.558201	0.319828	0.253461	0.0838274	-0.0796644
	4.29333	4.25162	3.20833	2.08731	1.19668	0.62513	0.374938	0.163298	-0.0708362	3.7212	2.56963	1.22803	0.555326	0.317526	0.251443	0.0859973	-0.0836602
	4.29667	4.24813	3.20736	2.08761	1.19844	0.629909	0.375933	0.162252	-0.0671744	3.72218	2.56869	1.22802	0.559803	0.315148	0.252192	0.0871298	-0.0839091
	4.3	4.24647	3.20445	2.08903	1.19812	0.624752	0.375039	0.167366	-0.0656192	3.72319	2.57392	1.22894	0.557999	0.320694	0.24974	0.0805722	-0.0806892
	4.30333	4.25222	3.21387	2.0858	1.19561	0.625099	0.370448	0.166793	-0.0691333	3.72515	2.57125	1.22599	0.554399	0.321233	0.250913	0.0833431	-0.0790775
	4.30667	4.2464	3.21024	2.09065	1.19839	0.625702	0.375362	0.16448	-0.0677981	3.72422	2.57177	1.2271	0.554788	0.320102	0.256318	0.0813787	-0.0806481
	4.31	4.24822	3.2128	2.08994	1.19827	0.632276	0.373528	0.164546	-0.072418	3.72479	2.57269	1.23052	0.558333	0.317155	0.25244	0.0823737	-0.0824193
	4.31333	4.2482	3.21015	2.09308	1.1981	0.626406	0.369722	0.160308	-0.0706565	3.72664	2.56884	1.22613	0.556533	0.317554	0.255601	0.0834981	-0.081541
	4.31667	4.25311	3.21618	2.09383	1.20403	0.627898	0.375176	0.16657	-0.071144	3.72459	2.56675	1.22996	0.558717	0.320226	0.252119	0.0853879	-0.0839182
	4.32	4.25529	3.2125	2.09545	1.20043	0.630227	0.375107	0.163576	-0.0669178	3.727	2.56794	1.22842	0.558112	0.321765	0.251069	0.0842636	-0.0788185
	4.32333	4.24986	3.21672	2.09285	1.19736	0.627076	0.372949	0.16134	-0.0636259	3.7311	2.57394	1.22938	0.559193	0.320814	0.252997	0.0851027	-0.0777625
	4.32667	4.24719	3.2084	2.09602	1.2003	0.625505	0.376753	0.168547	-0.0650623	3.72897	2.57132	1.23414	0.558229	0.31864	0.25256	0.0852827	-0.0833625
	4.33	4.25167	3.21473	2.09276	1.20451	0.628422	0.374367	0.168765	-0.0682873	3.72642	2.57235	1.23061	0.559278	0.320558	0.249293	0.0832823	-0.0856112
	4.33333	4.25432	3.21872	2.09302	1.20091	0.630201	0.377412	0.165973	-0.0733628	3.72657	2.57653	1.23044	0.556453	0.315698	0.25416	0.082167	-0.0842954
	4.33667	4.25873	3.22203	2.09296	1.20478	0.630574	0.37559	0.162175	-0.0674256	3.73338	2.57719	1.2332	0.557933	0.315596	0.253062	0.0850375	-0.0818624
	4.34	4.24735	3.21788	2.09732	1.20126	0.627333	0.375017	0.165669	-0.065327	3.72893	2.5794	1.23314	0.559357	0.319758	0.253364	0.0814992	-0.082141
	4.34333	4.25194	3.22158	2.09862	1.20129	0.626515	0.376874	0.163597	-0.0701432	3.72917	2.57683	1.23556	0.558374	0.316746	0.251863	0.0822384	-0.0801754
	4.34667	4.25336	3.21714	2.09601	1.20625	0.628762	0.376062	0.163307	-0.069191	3.73142	2.57685	1.2307	0.560073	0.322073	0.254032	0.0843911	-0.0832153
	4.35	4.25818	3.22171	2.09914	1.20289	0.627996	0.372799	0.162943	-0.0705956	3.73254	2.5744	1.23307	0.562219	0.320487	0.247404	0.0852357	-0.0824692
	4.35333	4.2541	3.22066	2.0991	1.20154	0.631287	0.373419	0.1656	-0.0693533	3.7332	2.57881	1.23845	0.557997	0.320722	0.252544	0.0839797	-0.0820611
	4.35667	4.25982	3.22153	2.09653	1.20081	0.625926	0.37124	0.164223	-0.0694047	3.73314	2.58038	1.23457	0.556659	0.319875	0.249941	0.0807801	-0.0830275
	4.36	4.25477	3.21933	2.09974	1.20821	0.632578	0.374007	0.165413	-0.0703018	3.73257	2.58641	1.23511	0.561881	0.318489	0.252715	0.0861522	-0.0816818
	4.36333	4.25557	3.2254	2.09932	1.20648	0.630813	0.372755	0.168255	-0.0665166	3.73086	2.58069	1.23757	0.560592	0.320913	0.254186	0.0821281	-0.0815828
	4.36667	4.25851	3.22373	2.09951	1.20649	0.627889	0.372988	0.167077	-0.0728691	3.73251	2.58823	1.23797	0.559805	0.322267	0.249156	0.085145	-0.0867005
	4.37	4.25764	3.22546	2.10403	1.2054	0.632659	0.370506	0.171353	-0.0686181	3.72997	2.57659	1.23652	0.561042	0.320699	0.251267	0.0857909	-0.0868453
	4.37333	4.25786	3.22496	2.103	1.20857	0.628338	0.370501	0.167175	-0.0685956	3.73117	2.58476	1.2346	0.555237	0.321482	0.252003	0.0873079	-0.0859353
	4.37667	4.26113	3.22451	2.10165	1.20871	0.63254	0.375852	0.163263	-0.0672035	3.73372	2.58203	1.23519	0.55744	0.31393	0.252569	0.0809209	-0.0839263
	4.38	4.26061	3.23286	2.10423	1.20294	0.630644	0.376959	0.16731	-0.0655623	3.73074	2.58621	1.2367	0.560381	0.319132	0.251376	0.0857806	-0.0849526
	4.38333	4.26001	3.23042	2.10195	1.20602	0.629643	0.377325	0.163176	-0.0693477	3.74218	2.58841	1.23556	0.560754	0.319456	0.253229	0.0820665	-0.0841003
	4.38667	4.26168	3.22806	2.10151	1.20966	0.631022	0.372978	0.159294	-0.0693555	3.73646	2.58707	1.23933	0.557936	0.318944	0.25409	0.0810985	-0.0814548
	4.39	4.25974	3.22918	2.10257	1.20562	0.627155	0.376279	0.163836	-0.0700881	3.73751	2.58746	1.24181	0.564253	0.318846	0.24853	0.0865365	-0.0804455
	4.39333	4.259	3.22679	2.1067	1.20506	0.629624	0.375168	0.164629	-0.0675271	3.73636	2.593	1.23813	0.560918	0.321201	0.255943	0.0868541	-0.0838467
	4.39667	4.26548	3.22825	2.10791	1.20545	0.632136	0.373794	0.163859	-0.0675554	3.74167	2.59089	1.23959	0.559655	0.322367	0.253122	0.0812156	-0.0834724
	4.4	4.26289	3.23044	2.10564	1.20743	0.630262	0.375575	0.163981	-0.0657606	3.73431	2.59302	1.2409	0.561626	0.321572	0.253551	0.083065	-0.0858715
	4.40333	4.26416	3.23114	2.10485	1.21033	0.630952	0.374154	0.166577	-0.0650686	3.73947	2.59284	1.2388	0.557992	0.321828	0.253038	0.0839559	-0.0858745
	4.40667	4.2679	3.23385	2.09872	1.20874	0.623807	0.376272	0.163185	-0.0736061	3.74594	2.59071	1.23735	0.558393	0.322845	0.250272	0.0806149	-0.0856513
	4.41	4.26659	3.23537	2.10561	1.21013	0.634276	0.375276	0.162675	-0.0684714	3.74023	2.59167	1.24091	0.557011	0.316865	0.255598	0.0815782	-0.0802957
	4.41333	4.26515	3.23134	2.1079	1.20656	0.636815	0.375893	0.163977	-0.067598	3.74117	2.59437	1.24484	0.556495	0.318305	0.253493	0.0835441	-0.0814211
	4.41667	4.26411	3.23249	2.10996	1.21437	0.632567	0.375801	0.163556	-0.0670791	3.74085	2.59493	1.24521	0.563052	0.316994	0.254211	0.0850527	-0.0864443
	4.42	4.2664	3.23163	2.10702	1.20766	0.633575	0.376974	0.16733	-0.0659893	3.74123	2.59181	1.24658	0.559685	0.31757	0.253604	0.0853197	-0.0829076
	4.42333	4.26215	3.23181	2.11078	1.20845	0.63373	0.376117	0.163711	-0.0701765	3.74186	2.59236	1.24031	0.560239	0.315062	0.250143	0.0846163	-0.0825047
	4.42667	4.26624	3.23633	2.11088	1.21127	0.632009	0.37487	0.165697	-0.0733579	3.74452	2.59565	1.24389	0.564548	0.318044	0.252058	0.0844725	-0.0813352
	4.43	4.26766	3.23145	2.1082	1.20902	0.630604	0.37559	0.162458	-0.0700089	3.74175	2.59838	1.24082	0.559124	0.318004	0.253579	0.0860553	-0.084426
	4.43333	4.26732	3.23594	2.11259	1.21076	0.63422	0.371829	0.168021	-0.0689933	3.74588	2.59903	1.24286	0.561155	0.319776	0.253297	0.0800035	-0.0827013
	4.43667	4.26576	3.23815	2.10758	1.20925	0.633076	0.377819	0.164016	-0.0719533	3.74281	2.59834	1.24186	0.56394	0.320568	0.248939	0.0814086	-0.0842972
	4.44	4.2698	3.23934	2.11315	1.21148	0.632443	0.376316	0.165956	-0.0713143	3.74899	2.59867	1.249	0.560372	0.319087	0.250372	0.0815929	-0.0846246
	4.44333	4.26953	3.23801	2.11241	1.21491	0.633677	0.373691	0.165411	-0.0724417	3.75068	2.59724	1.24567	0.558266	0.320797	0.25509	0.0839726	-0.085869
	4.44667	4.27157	3.2404	2.10754	1.21407	0.630208	0.379562	0.16489	-0.0704501	3.74909	2.60233	1.25234	0.56386	0.317524	0.252855	0.0873196	-0.0842162
	4.45	4.26921	3.23785	2.11373	1.21225	0.63417	0.379713	0.161999	-0.0732779	3.74963	2.6021	1.24708	0.560867	0.319526	0.254355	0.0859984	-0.0858099
	4.45333	4.26875	3.24038	2.11152	1.21279	0.629925	0.37919	0.168209	-0.071689	3.74858	2.59847	1.24349	0.560903	0.320415	0.250934	0.0839183	-0.0869089
	4.45667	4.26935	3.23999	2.11248	1.2154	0.633808	0.377676	0.164161	-0.0711433	3.74829	2.59995	1.24979	0.562537	0.317566	0.253823	0.0825937	-0.085991
	4.46	4.27304	3.24557	2.11539	1.21438	0.629773	0.374935	0.167234	-0.0695362	3.75094	2.60609	1.24509	0.562616	0.320855	0.248353	0.0872339	-0.0863873
	4.46333	4.27335	3.24436	2.11609	1.21323	0.632961	0.374191	0.165815	-0.0719408	3.74685	2.60286	1.24784	0.557883	0.317962	0.251588	0.0858288	-0.0797796
	4.46667	4.27105	3.24579	2.11928	1.21164	0.629962	0.374949	0.159743	-0.0667255	3.75318	2.60109	1.24985	0.563967	0.319328	0.249175	0.0819398	-0.0808841
	4.47	4.27448	3.24265	2.11757	1.21059	0.628703	0.375652	0.166128	-0.0673499	3.75133	2.60206	1.24787	0.561252	0.316028	0.251912	0.0839453	-0.0861118
	4.47333	4.27898	3.24135	2.12063	1.21788	0.635324	0.37584	0.160701	-0.070503	3.75184	2.60463	1.24878	0.560493	0.318216	0.249543	0.0832783	-0.0835892
	4.47667	4.27278	3.24307	2.11464	1.21474	0.631091	0.380132	0.166923	-0.0717698	3.75118	2.60353	1.25151	0.560844	0.322751	0.252929	0.085731	-0.0853953
	4.48	4.27237	3.24576	2.11541	1.21505	0.633547	0.3786	0.163503	-0.0747186	3.75412	2.606	1.24832	0.562313	0.320459	0.253842	0.0814787	-0.086324
	4.48333	4.27306	3.24488	2.12058	1.21248	0.636055	0.373951	0.164369	-0.0686601	3.7579	2.60485	1.25322	0.557764	0.315402	0.248582	0.0844387	-0.0795709
	4.48667	4.27585	3.24812	2.12117	1.21231	0.632772	0.37553	0.164339	-0.070834	3.75201	2.60672	1.24987	0.564919	0.320197	0.255188	0.0822487	-0.0846603
	4.49	4.28044	3.24568	2.11977	1.21686	0.630811	0.377258	0.170134	-0.0691127	3.75675	2.61107	1.24917	0.566406	0.317278	0.255264	0.0834842	-0.0856682
	4.49333	4.27755	3.24681	2.12153	1.21419	0.636663	0.377688	0.164375	-0.0721726	3.74817	2.60734	1.25411	0.557851	0.317954	0.252654	0.0847865	-0.0853029
	4.49667	4.27952	3.24393	2.11773	1.21876	0.632572	0.376191	0.16483	-0.071713	3.75491	2.61244	1.25312	0.561933	0.322681	0.25343	0.0822966	-0.0809524
	4.5	4.27681	3.24514	2.12344	1.21493	0.631599	0.374456	0.162601	-0.0662695	3.75742	2.61078	1.25183	0.565777	0.320173	0.249436	0.0809929	-0.0868861
	4.50333	4.27505	3.24771	2.12062	1.21351	0.634261	0.380644	0.162474	-0.0738866	3.75429	2.61065	1.25105	0.562136	0.320007	0.254324	0.0804138	-0.0898689
	4.50667	4.27634	3.25049	2.12052	1.21567	0.633689	0.376216	0.167087	-0.0707548	3.75252	2.61285	1.25381	0.56174	0.320702	0.251519	0.0862104	-0.0824123
	4.51	4.27811	3.25475	2.12536	1.21702	0.633794	0.374519	0.165967	-0.0682922	3.75685	2.61324	1.25471	0.564955	0.322542	0.253314	0.0826114	-0.08494
	4.51333	4.28087	3.24964	2.12224	1.21905	0.634128	0.374612	0.163709	-0.0726084	3.75447	2.6111	1.24938	0.568991	0.319432	0.252986	0.0835174	-0.0827504
	4.51667	4.28049	3.2493	2.12423	1.21676	0.630891	0.375368	0.164208	-0.0718278	3.75537	2.6136	1.25432	0.561771	0.314512	0.254665	0.0808724	-0.0849275
	4.52	4.27934	3.25361	2.12305	1.21714	0.633973	0.377433	0.16525	-0.0726979	3.75728	2.61364	1.25133	0.564129	0.318363	0.251309	0.0858722	-0.0861352
	4.52333	4.28128	3.24977	2.12316	1.21812	0.638268	0.376915	0.162385	-0.0682282	3.7524	2.61557	1.25125	0.564021	0.318272	0.253945	0.0791162	-0.0853184
	4.52667	4.27918	3.25443	2.12559	1.22014	0.632621	0.373855	0.16826	-0.0705419	3.75616	2.6168	1.25431	0.568455	0.316835	0.251273	0.0820114	-0.0844661
	4.53	4.28427	3.25421	2.12617	1.21557	0.632927	0.372995	0.161554	-0.0735062	3.75418	2.6177	1.25274	0.563606	0.319964	0.252383	0.0838904	-0.0852326
	4.53333	4.27851	3.25196	2.12674	1.21728	0.636086	0.377391	0.163777	-0.0732018	3.75964	2.61663	1.2553	0.56129	0.312218	0.249227	0.0858274	-0.0825821
	4.53667	4.28284	3.25792	2.126	1.21909	0.630702	0.375737	0.161578	-0.0688803	3.76112	2.6205	1.25579	0.562923	0.319623	0.253859	0.083858	-0.0892917
	4.54	4.2865	3.25919	2.13143	1.21985	0.635911	0.376711	0.165408	-0.0728323	3.7618	2.62074	1.25266	0.565694	0.318829	0.255768	0.0808797	-0.0843196
	4.54333	4.28031	3.25614	2.12997	1.21937	0.631245	0.375617	0.164784	-0.0740906	3.76404	2.61969	1.25842	0.561566	0.321908	0.254788	0.0853771	-0.0840216
	4.54667	4.28103	3.25884	2.13371	1.21945	0.633093	0.377382	0.163716	-0.0721675	3.76063	2.61911	1.25281	0.565995	0.317958	0.249193	0.0838908	-0.0872711
	4.55	4.28568	3.25563	2.1308	1.22086	0.632865	0.377123	0.165358	-0.0679802	3.76115	2.62127	1.25684	0.562282	0.31597	0.252302	0.085342	-0.0814448
	4.55333	4.28578	3.25737	2.13056	1.22097	0.637895	0.377266	0.163568	-0.0750732	3.76233	2.62125	1.25685	0.569509	0.318799	0.252218	0.0806399	-0.0866857
	4.55667	4.2857	3.26043	2.13204	1.22028	0.640111	0.376992	0.163108	-0.072705	3.76137	2.62331	1.25581	0.562478	0.320093	0.251158	0.0856277	-0.0821132
	4.56	4.2871	3.26251	2.12958	1.22125	0.633453	0.380942	0.164882	-0.0717114	3.76278	2.62102	1.25552	0.564315	0.326251	0.252695	0.0838764	-0.0850175
	4.56333	4.28683	3.26178	2.12681	1.22495	0.636806	0.375291	0.163783	-0.0732873	3.76442	2.62422	1.25714	0.562885	0.319825	0.252501	0.0830152	-0.0875696
	4.56667	4.28752	3.26033	2.1315	1.22496	0.632555	0.3794	0.161323	-0.0745071	3.76482	2.62322	1.25987	0.562697	0.316623	0.250399	0.082646	-0.0834179
	4.57	4.29237	3.26182	2.13542	1.22703	0.63421	0.377985	0.164223	-0.0704995	3.76422	2.63015	1.25933	0.568897	0.317709	0.25297	0.0821572	-0.0835366
	4.57333	4.28834	3.2638	2.13422	1.22145	0.639502	0.37829	0.16624	-0.07481	3.76651	2.62907	1.25716	0.563518	0.317596	0.252342	0.0864043	-0.0845625
	4.57667	4.28618	3.2682	2.13813	1.22414	0.635826	0.374814	0.160828	-0.0721882	3.76882	2.62373	1.26051	0.563063	0.319891	0.251999	0.0845473	-0.0901251
	4.58	4.28729	3.26301	2.13418	1.22055	0.638446	0.375297	0.165342	-0.0732583	3.77242	2.62388	1.26112	0.561528	0.320533	0.249081	0.0810805	-0.0892265
	4.58333	4.28922	3.26467	2.13697	1.22629	0.636566	0.372987	0.164708	-0.0706801	3.76944	2.6318	1.25972	0.565135	0.322364	0.249504	0.0814684	-0.0868646
	4.58667	4.29297	3.26709	2.13314	1.22593	0.628486	0.37722	0.165288	-0.0739868	3.76568	2.62549	1.26079	0.56494	0.31776	0.248045	0.0825899	-0.08914
	4.59	4.29459	3.265	2.13212	1.22243	0.632142	0.377461	0.170185	-0.0758836	3.77016	2.63023	1.26679	0.565282	0.321343	0.25247	0.0824311	-0.0843171
	4.59333	4.29203	3.27028	2.13832	1.22514	0.636792	0.372683	0.162708	-0.0744938	3.76786	2.62995	1.26366	0.566982	0.31752	0.251955	0.0839465	-0.0844355
	4.59667	4.29127	3.26713	2.13447	1.22819	0.639693	0.378477	0.165943	-0.0732469	3.76742	2.63036	1.26271	0.568625	0.318176	0.251781	0.0809558	-0.0866905
	4.6	4.29212	3.26784	2.13697	1.22572	0.638253	0.378326	0.164224	-0.0739932	3.77207	2.62453	1.26236	0.564047	0.316381	0.249851	0.0856473	-0.0865574
	4.60333	4.29449	3.26485	2.13762	1.22605	0.638497	0.373673	0.163263	-0.0723281	3.76965	2.6309	1.25962	0.562111	0.322597	0.248989	0.0817926	-0.0857788
	4.60667	4.29431	3.26677	2.14111	1.22254	0.638741	0.37649	0.159414	-0.0711495	3.7703	2.63003	1.2637	0.565881	0.319707	0.252543	0.0848326	-0.0849125
	4.61	4.29032	3.26964	2.13858	1.22638	0.634731	0.375499	0.162807	-0.0740767	3.76862	2.62827	1.26461	0.566267	0.319685	0.246748	0.0835292	-0.085531
	4.61333	4.29381	3.27072	2.13945	1.22747	0.63954	0.376009	0.166707	-0.0732412	3.76926	2.63102	1.26375	0.566377	0.321316	0.250717	0.0853814	-0.0914826
	4.61667	4.29133	3.27283	2.14147	1.22737	0.634496	0.378548	0.164997	-0.0742369	3.77492	2.63182	1.26505	0.56854	0.320818	0.249659	0.0826304	-0.0901312
	4.62	4.29523	3.2683	2.14186	1.22501	0.63753	0.37919	0.164838	-0.0727413	3.77422	2.63633	1.26111	0.565502	0.317088	0.249912	0.085183	-0.0876289
	4.62333	4.2946	3.27169	2.14371	1.22699	0.633654	0.374455	0.168458	-0.077037	3.77013	2.63583	1.26275	0.564998	0.31687	0.255438	0.0846218	-0.0875046
	4.62667	4.29535	3.2765	2.13678	1.23149	0.639385	0.376281	0.161865	-0.0752159	3.77224	2.63457	1.26448	0.565932	0.321015	0.250582	0.0814254	-0.0838368
	4.63	4.29754	3.27529	2.14331	1.22656	0.633008	0.373396	0.163936	-0.0727021	3.77113	2.64091	1.26504	0.565167	0.318506	0.251698	0.0848996	-0.0865574
	4.63333	4.29511	3.27775	2.1464	1.23216	0.634588	0.376019	0.165585	-0.0740952	3.77483	2.6422	1.26615	0.564473	0.319846	0.249306	0.0853741	-0.0847071
	4.63667	4.29445	3.27026	2.14521	1.23327	0.63632	0.378722	0.162296	-0.0708479	3.77581	2.6384	1.26788	0.565928	0.315096	0.25387	0.0851624	-0.089748
	4.64	4.29489	3.27361	2.14823	1.22654	0.639321	0.377707	0.162997	-0.0753522	3.77486	2.63904	1.2667	0.565385	0.31612	0.250674	0.0832547	-0.08348
	4.64333	4.29356	3.27521	2.14581	1.2328	0.635682	0.377824	0.166875	-0.0729334	3.77192	2.644	1.26825	0.566261	0.318812	0.248527	0.0837496	-0.0889575
	4.64667	4.29478	3.27485	2.14757	1.23249	0.635165	0.379027	0.161482	-0.0743792	3.77993	2.63848	1.26626	0.564213	0.320958	0.254539	0.0853166	-0.0881056
	4.65	4.299	3.27868	2.14508	1.22962	0.63579	0.379235	0.167452	-0.0764739	3.78017	2.64677	1.26563	0.564383	0.318966	0.25003	0.0827898	-0.0861181
	4.65333	4.29677	3.27608	2.14951	1.23367	0.640587	0.375599	0.16826	-0.074678	3.78098	2.64217	1.26854	0.564917	0.317852	0.246745	0.0854111	-0.0834328
	4.65667	4.29797	3.27547	2.14438	1.2305	0.639354	0.376539	0.161798	-0.0763265	3.77573	2.64562	1.27047	0.566736	0.317994	0.248985	0.0830021	-0.0870365
	4.66	4.29747	3.28003	2.14871	1.23486	0.636184	0.374797	0.165172	-0.0735481	3.77715	2.64388	1.27285	0.568434	0.318296	0.24896	0.0844959	-0.09007
	4.66333	4.29992	3.27515	2.14963	1.23259	0.637495	0.375512	0.164201	-0.070367	3.77664	2.64276	1.2719	0.565745	0.315635	0.252335	0.0802758	-0.0862646
	4.66667	4.30037	3.27691	2.15082	1.23688	0.638001	0.376026	0.167288	-0.0749069	3.78178	2.64279	1.27384	0.569074	0.319003	0.252104	0.0865733	-0.083737
	4.67	4.29574	3.27872	2.14532	1.23145	0.638283	0.38059	0.164781	-0.0737478	3.7796	2.64696	1.27037	0.563826	0.320473	0.253224	0.080426	-0.0911584
	4.67333	4.30316	3.27721	2.15221	1.23721	0.638268	0.378864	0.164931	-0.0746397	3.78028	2.6477	1.27388	0.566788	0.32062	0.25518	0.0814007	-0.0825518
	4.67667	4.29819	3.28587	2.14886	1.2354	0.63678	0.37919	0.161232	-0.0730857	3.78423	2.64534	1.27393	0.564016	0.320471	0.254632	0.078927	-0.0910113
	4.68	4.30278	3.27911	2.14986	1.23177	0.642232	0.376177	0.163702	-0.0733712	3.77926	2.64408	1.27091	0.564973	0.3174	0.252015	0.0804735	-0.0875462
	4.68333	4.30359	3.27756	2.15009	1.23384	0.641198	0.376352	0.164281	-0.0668414	3.78397	2.64862	1.27458	0.565877	0.320966	0.252587	0.082307	-0.0884213
	4.68667	4.30499	3.2793	2.15212	1.2407	0.636917	0.377873	0.161731	-0.069596	3.77789	2.64687	1.27234	0.566495	0.318436	0.249036	0.0819257	-0.0918203
	4.69	4.30478	3.28364	2.1543	1.23525	0.640073	0.376569	0.162894	-0.0729344	3.78449	2.6502	1.27568	0.56656	0.316824	0.250291	0.0822033	-0.0865902
	4.69333	4.30832	3.28358	2.14989	1.23535	0.635516	0.378898	0.161875	-0.0742301	3.78186	2.6464	1.27258	0.563853	0.319758	0.251242	0.0832114	-0.0900055
	4.69667	4.30607	3.28182	2.14991	1.22855	0.64306	0.374515	0.160559	-0.0747133	3.78211	2.64907	1.27434	0.567546	0.321575	0.250813	0.0865569	-0.087659
	4.7	4.30254	3.28646	2.15289	1.23559	0.638949	0.379419	0.166048	-0.0731344	3.78581	2.6541	1.27389	0.573228	0.316888	0.250275	0.0830767	-0.0866678
	4.70333	4.3055	3.28508	2.15728	1.2335	0.634042	0.377835	0.168346	-0.0766755	3.78392	2.65182	1.27348	0.56656	0.316529	0.249886	0.085443	-0.0908112
	4.70667	4.30113	3.28653	2.15684	1.23605	0.640814	0.381402	0.162845	-0.0718721	3.78449	2.65519	1.27668	0.570918	0.319593	0.251435	0.0809481	-0.0865276
	4.71	4.30643	3.2896	2.15341	1.23889	0.637645	0.374406	0.163328	-0.0724423	3.78606	2.65184	1.27375	0.567783	0.315518	0.250316	0.0805135	-0.0862314
	4.71333	4.30688	3.28389	2.15455	1.23529	0.635719	0.378152	0.169998	-0.0728047	3.79017	2.65881	1.27648	0.571781	0.319954	0.251645	0.0806008	-0.0887452
	4.71667	4.30778	3.28678	2.15595	1.23869	0.639237	0.378367	0.166285	-0.071983	3.78604	2.65385	1.27619	0.567527	0.323781	0.253377	0.0821909	-0.0894454
	4.72	4.30946	3.28798	2.15503	1.23785	0.645256	0.375972	0.163373	-0.0736725	3.78788	2.65296	1.28085	0.569787	0.318205	0.25391	0.0841293	-0.0904311
	4.72333	4.30862	3.28826	2.15548	1.23473	0.640717	0.375005	0.164716	-0.0777656	3.78752	2.66174	1.2751	0.570419	0.318978	0.251446	0.0824367	-0.0870466
	4.72667	4.30892	3.28639	2.16091	1.23314	0.642135	0.375668	0.165116	-0.0750876	3.79301	2.65729	1.27897	0.571714	0.323187	0.251729	0.0849497	-0.0874663
	4.73	4.31252	3.29202	2.15348	1.23391	0.639486	0.379632	0.162971	-0.0751988	3.79389	2.65355	1.27314	0.569085	0.320292	0.250631	0.0828858	-0.0895345
	4.73333	4.30797	3.29362	2.16297	1.2366	0.63828	0.379278	0.165806	-0.0721689	3.78675	2.65481	1.27894	0.568483	0.320328	0.251504	0.0863323	-0.0849994
	4.73667	4.31184	3.29091	2.15288	1.23893	0.640989	0.371702	0.164605	-0.0783612	3.79024	2.65995	1.28016	0.568902	0.318759	0.248836	0.0824684	-0.0905986
	4.74	4.31149	3.2942	2.15814	1.23931	0.639551	0.377526	0.166063	-0.0770398	3.78965	2.65764	1.2783	0.5717	0.323026	0.254734	0.0813392	-0.09002
	4.74333	4.31237	3.29173	2.15945	1.24083	0.641572	0.376247	0.162016	-0.0723767	3.79154	2.66103	1.27794	0.570278	0.318944	0.254989	0.0790651	-0.0892799
	4.74667	4.31163	3.29344	2.16025	1.2398	0.640632	0.378032	0.161665	-0.0723905	3.7905	2.66301	1.27775	0.572256	0.32139	0.253148	0.0834356	-0.0906162
	4.75	4.30925	3.29427	2.16561	1.24212	0.639733	0.37692	0.166231	-0.0707267	3.79465	2.65926	1.28105	0.571578	0.318917	0.247858	0.0851787	-0.0892251
	4.75333	4.31315	3.29936	2.16378	1.23886	0.638552	0.38002	0.161502	-0.0753373	3.79349	2.66121	1.28594	0.574419	0.320477	0.251068	0.0820735	-0.0922695
	4.75667	4.31136	3.29383	2.16049	1.24164	0.63959	0.379505	0.162896	-0.0772959	3.79275	2.66487	1.2814	0.573496	0.316122	0.249601	0.0816101	-0.0878838
	4.76	4.31324	3.29484	2.16688	1.23565	0.641381	0.374945	0.166312	-0.072027	3.79588	2.66524	1.2821	0.567784	0.320452	0.251549	0.0821881	-0.0894798
	4.76333	4.31574	3.29823	2.1549	1.24282	0.642041	0.379161	0.161745	-0.075013	3.79216	2.66195	1.28536	0.56892	0.319911	0.251931	0.083506	-0.0942912
	4.76667	4.31121	3.29625	2.16672	1.23808	0.641345	0.375402	0.16216	-0.0761654	3.79334	2.66378	1.28143	0.572836	0.319961	0.253887	0.0833283	-0.0907516
	4.77	4.31624	3.29617	2.16761	1.23841	0.643953	0.381576	0.167561	-0.0754821	3.7959	2.65978	1.28586	0.566593	0.322257	0.251048	0.0797511	-0.0881507
	4.77333	4.31743	3.29864	2.16912	1.24062	0.64113	0.377555	0.165257	-0.0720781	3.79323	2.66371	1.28374	0.567157	0.31825	0.25424	0.0809271	-0.0873328
	4.77667	4.31591	3.29839	2.1587	1.24312	0.641236	0.379139	0.164406	-0.0724216	3.79764	2.66736	1.28832	0.567513	0.31716	0.253665	0.0818801	-0.0929794
	4.78	4.31797	3.29576	2.16712	1.24555	0.641534	0.376824	0.163719	-0.0758665	3.7972	2.66549	1.28404	0.569356	0.31962	0.252178	0.0836979	-0.0926075
	4.78333	4.31508	3.30382	2.16853	1.2396	0.644354	0.376351	0.165304	-0.0761658	3.79602	2.66406	1.28397	0.571705	0.317394	0.251875	0.0818883	-0.0912398
	4.78667	4.31324	3.2986	2.16228	1.23782	0.646368	0.38054	0.165089	-0.0748745	3.79786	2.67241	1.28283	0.568273	0.316403	0.249945	0.083654	-0.0877011
	4.79	4.31611	3.29694	2.16886	1.24212	0.64152	0.380746	0.162924	-0.0758414	3.796	2.6685	1.28458	0.568837	0.319452	0.253295	0.0787937	-0.0905962
	4.79333	4.31922	3.30217	2.16929	1.24459	0.641601	0.377581	0.163404	-0.0741959	3.80143	2.66726	1.28369	0.56521	0.319472	0.253534	0.0824699	-0.0923742
	4.79667	4.31473	3.29974	2.16879	1.24283	0.643988	0.378218	0.164458	-0.0775821	3.79841	2.67135	1.28603	0.571503	0.316449	0.253368	0.084317	-0.089801
	4.8	4.31795	3.30364	2.16904	1.23989	0.642412	0.376747	0.162105	-0.0751903	3.80074	2.66883	1.28534	0.57371	0.318268	0.252429	0.0810618	-0.0884885
	4.80333	4.31774	3.3031	2.17315	1.24101	0.641768	0.376978	0.165637	-0.0774694	3.79906	2.67304	1.28677	0.571372	0.319998	0.250928	0.0816529	-0.0880046
	4.80667	4.32023	3.30231	2.1708	1.24299	0.641859	0.378237	0.162762	-0.0754645	3.7991	2.67053	1.28393	0.572821	0.319947	0.252232	0.0788336	-0.0850549
	4.81	4.32169	3.30329	2.16988	1.24495	0.64004	0.377917	0.168328	-0.0766472	3.80219	2.67323	1.29044	0.570597	0.31838	0.248944	0.0817099	-0.0883422
	4.81333	4.31957	3.30369	2.1704	1.24355	0.643231	0.379594	0.164376	-0.0795944	3.80309	2.67348	1.29108	0.569712	0.31687	0.248447	0.08444	-0.0879073
	4.81667	4.32414	3.29904	2.17234	1.24459	0.643832	0.381045	0.161938	-0.0778531	3.80108	2.67347	1.29112	0.570144	0.317843	0.252	0.0812955	-0.0927775
	4.82	4.32313	3.30434	2.17616	1.24666	0.647445	0.377469	0.16395	-0.074866	3.80039	2.67642	1.28716	0.570401	0.321014	0.251784	0.0801306	-0.0902352
	4.82333	4.31864	3.30654	2.17593	1.24415	0.645165	0.382312	0.161848	-0.0724603	3.8044	2.67489	1.29176	0.570561	0.318926	0.249244	0.0835746	-0.0884027
	4.82667	4.31821	3.30504	2.17244	1.2458	0.640744	0.378646	0.16266	-0.0774584	3.80308	2.67697	1.29408	0.567188	0.318615	0.252921	0.0842076	-0.0883502
	4.83	4.32535	3.30675	2.17172	1.24877	0.643459	0.376652	0.167447	-0.0693757	3.79938	2.67969	1.28916	0.572843	0.320416	0.252185	0.0757307	-0.0883352
	4.83333	4.32216	3.31159	2.17273	1.24848	0.644735	0.380827	0.16527	-0.0728634	3.80345	2.67382	1.28679	0.570646	0.320056	0.252399	0.0842609	-0.0908473
	4.83667	4.3252	3.30942	2.17055	1.24814	0.645728	0.380217	0.165178	-0.0776064	3.79861	2.67753	1.28847	0.574601	0.313934	0.257021	0.0830932	-0.0891456
	4.84	4.32233	3.30787	2.17408	1.24707	0.645452	0.379878	0.167093	-0.0773097	3.80203	2.6811	1.29275	0.569517	0.320228	0.252125	0.0827997	-0.0921118
	4.84333	4.32304	3.31042	2.17849	1.25281	0.64566	0.378845	0.163664	-0.0768315	3.8066	2.679	1.29142	0.570548	0.319428	0.251481	0.0822641	-0.0918185
	4.84667	4.32508	3.31108	2.17272	1.24477	0.644592	0.380248	0.165452	-0.0806462	3.80587	2.67687	1.29203	0.575384	0.31919	0.251501	0.0802314	-0.0915527
	4.85	4.32062	3.31262	2.18124	1.2495	0.644614	0.381086	0.164704	-0.0748558	3.80791	2.68377	1.28726	0.572223	0.320532	0.252275	0.0870387	-0.0880095
	4.85333	4.32403	3.31326	2.18251	1.24715	0.646308	0.37774	0.164267	-0.0744305	3.80787	2.68101	1.2916	0.571325	0.319818	0.250782	0.0861455	-0.0889143
	4.85667	4.32296	3.31493	2.18232	1.2514	0.642029	0.379769	0.162871	-0.0767679	3.8054	2.68171	1.29316	0.569308	0.320596	0.25391	0.0868035	-0.0887661
	4.86	4.31895	3.31581	2.1758	1.25201	0.643661	0.378662	0.167501	-0.0780736	3.80909	2.6829	1.29311	0.572984	0.318576	0.253892	0.0846206	-0.0906938
	4.86333	4.32467	3.31335	2.17913	1.24831	0.649801	0.381004	0.169213	-0.0779326	3.80751	2.67975	1.29286	0.567906	0.318711	0.249497	0.0840124	-0.0906425
	4.86667	4.32816	3.31444	2.18011	1.24835	0.645526	0.381479	0.165822	-0.0793576	3.80833	2.68308	1.28835	0.574375	0.320303	0.256336	0.0799049	-0.0915112
	4.87	4.32738	3.31204	2.17785	1.25019	0.64195	0.373535	0.165651	-0.0797746	3.8061	2.68675	1.29412	0.570363	0.315031	0.245893	0.0849889	-0.0922282
	4.87333	4.3243	3.31802	2.18114	1.24532	0.64254	0.380145	0.16382	-0.0758216	3.81003	2.6845	1.29228	0.573439	0.318779	0.249444	0.0855381	-0.0886225
	4.87667	4.33096	3.31735	2.1782	1.25249	0.647912	0.37591	0.16452	-0.0745117	3.80895	2.68528	1.29566	0.572969	0.320669	0.250423	0.0811184	-0.0901475
	4.88	4.32649	3.32084	2.17787	1.24606	0.64677	0.381385	0.165175	-0.0767731	3.81041	2.68226	1.29253	0.570238	0.312782	0.253235	0.0808023	-0.0878668
	4.88333	4.32804	3.31391	2.18232	1.25375	0.6465	0.37575	0.163678	-0.0755464	3.81131	2.6848	1.29726	0.572846	0.319829	0.255337	0.0855329	-0.0883823
	4.88667	4.33587	3.31504	2.18403	1.25109	0.645844	0.382681	0.166288	-0.0767092	3.80803	2.68761	1.29577	0.570782	0.318804	0.248668	0.0804688	-0.0915782
	4.89	4.33409	3.31641	2.18447	1.2521	0.651172	0.382518	0.164352	-0.0765578	3.80926	2.68753	1.29784	0.574565	0.317758	0.250198	0.0806749	-0.0944736
	4.89333	4.33232	3.31822	2.18704	1.25186	0.642772	0.378961	0.166829	-0.0767473	3.81514	2.68672	1.29728	0.572461	0.319445	0.254314	0.0821637	-0.0892671
	4.89667	4.33363	3.32046	2.18534	1.25565	0.648738	0.383273	0.165985	-0.0809383	3.81154	2.68569	1.29915	0.574618	0.321773	0.250674	0.0819106	-0.0926602
	4.9	4.33216	3.3197	2.18608	1.24919	0.642786	0.379961	0.165225	-0.0812799	3.80775	2.68732	1.29389	0.573427	0.316399	0.252325	0.0848914	-0.0927963
	4.90333	4.33162	3.32242	2.18769	1.25436	0.644314	0.375876	0.167063	-0.0747437	3.80957	2.69006	1.29555	0.569729	0.319663	0.249706	0.0852389	-0.0921408
	4.90667	4.33422	3.31679	2.18762	1.25386	0.644444	0.380881	0.16046	-0.0799843	3.80997	2.68771	1.30017	0.568747	0.321782	0.250682	0.0834596	-0.0893952
	4.91	4.33083	3.32515	2.18811	1.25241	0.643699	0.378694	0.162638	-0.0771276	3.81555	2.69418	1.30121	0.571886	0.31611	0.249313	0.079965	-0.0903321
	4.91333	4.33071	3.32197	2.19083	1.2529	0.644259	0.378052	0.165019	-0.0753186	3.82025	2.69069	1.30146	0.572699	0.319136	0.254364	0.0835438	-0.0939165
	4.91667	4.33455	3.32203	2.19104	1.25211	0.642486	0.381212	0.163942	-0.0740367	3.81277	2.6942	1.29926	0.576101	0.318853	0.251599	0.0806342	-0.0884226
	4.92	4.32954	3.3228	2.18942	1.25403	0.643297	0.38263	0.16183	-0.0753673	3.81661	2.69474	1.30222	0.579665	0.320229	0.252854	0.0833292	-0.0926234
	4.92333	4.33261	3.32689	2.19275	1.25179	0.648566	0.379689	0.164004	-0.0749405	3.81597	2.68811	1.29933	0.572162	0.317891	0.250993	0.0802219	-0.0869904
	4.92667	4.3334	3.32835	2.18746	1.25798	0.647128	0.380093	0.165993	-0.0791486	3.81609	2.69445	1.29751	0.574993	0.320166	0.252792	0.0808332	-0.088799
	4.93	4.33807	3.3253	2.19052	1.25318	0.644362	0.38016	0.166691	-0.0764764	3.81743	2.69591	1.29983	0.576171	0.3231	0.253783	0.0802249	-0.0940591
	4.93333	4.33848	3.32216	2.19058	1.25572	0.645732	0.378502	0.161063	-0.0784748	3.81526	2.69131	1.30208	0.578897	0.316694	0.251521	0.083295	-0.0861614
	4.93667	4.33833	3.3251	2.19218	1.25646	0.653153	0.381311	0.168361	-0.078225	3.81653	2.69659	1.30218	0.573032	0.319494	0.249605	0.0831438	-0.0947931
	4.94	4.33786	3.32773	2.19124	1.26299	0.649539	0.381105	0.164	-0.078249	3.81894	2.69718	1.29915	0.573347	0.321502	0.251329	0.08339	-0.0939216
	4.94333	4.33931	3.32509	2.19015	1.25836	0.645803	0.380694	0.165601	-0.0806514	3.81962	2.69967	1.29955	0.577862	0.317626	0.251913	0.0798926	-0.0931043
	4.94667	4.33944	3.32927	2.19437	1.25408	0.647594	0.377906	0.164706	-0.0807445	3.82407	2.69732	1.30195	0.572256	0.324688	0.251373	0.0876618	-0.0943924
	4.95	4.34168	3.33073	2.19304	1.26003	0.647848	0.384833	0.167045	-0.0768197	3.81779	2.69793	1.30569	0.575368	0.318323	0.254491	0.0813563	-0.0903342
	4.95333	4.34072	3.33011	2.19086	1.2559	0.646922	0.382402	0.162776	-0.0769485	3.82358	2.69975	1.30256	0.572356	0.318913	0.249999	0.0847169	-0.0930697
	4.95667	4.3368	3.32751	2.19503	1.25258	0.64991	0.380428	0.16264	-0.0750583	3.81877	2.70073	1.30064	0.577317	0.319074	0.246681	0.0821751	-0.0880641
	4.96	4.3376	3.3281	2.18995	1.25759	0.648694	0.378099	0.164787	-0.0797173	3.82453	2.69648	1.3024	0.572086	0.321581	0.251263	0.0812017	-0.0957055
	4.96333	4.33851	3.3315	2.19574	1.25564	0.645622	0.38208	0.166343	-0.080266	3.82307	2.69948	1.30256	0.577103	0.321087	0.251052	0.0809772	-0.0908084
	4.96667	4.33879	3.3332	2.19187	1.25937	0.647707	0.3805	0.166729	-0.0754241	3.82378	2.70271	1.30693	0.572629	0.324592	0.247019	0.0821106	-0.0918588
	4.97	4.33904	3.3329	2.19179	1.26079	0.64762	0.383142	0.16483	-0.0757275	3.82113	2.70181	1.30322	0.579098	0.322643	0.249323	0.0831324	-0.0917616
	4.97333	4.34053	3.33053	2.19528	1.25883	0.642834	0.384349	0.161261	-0.0799868	3.82251	2.70746	1.3007	0.571965	0.319572	0.251802	0.0825767	-0.0947544
	4.97667	4.34137	3.33153	2.19193	1.2611	0.651783	0.379583	0.160754	-0.0772943	3.82934	2.70092	1.30377	0.571956	0.317895	0.252697	0.0833632	-0.0921789
	4.98	4.34032	3.33324	2.19476	1.2625	0.649207	0.38111	0.162919	-0.0732815	3.82717	2.69961	1.30772	0.573901	0.319288	0.254452	0.0807193	-0.0884898
	4.98333	4.3459	3.33136	2.19495	1.26207	0.648337	0.378672	0.165826	-0.0822138	3.82863	2.70224	1.30499	0.568522	0.316926	0.255942	0.0810174	-0.0902543
	4.98667	4.34285	3.33513	2.19911	1.26104	0.648881	0.384618	0.161321	-0.080671	3.82218	2.70303	1.30743	0.578915	0.317435	0.250597	0.0829159	-0.0926623
	4.99	4.34438	3.33378	2.20143	1.26127	0.650242	0.378679	0.164061	-0.0803443	3.82596	2.70803	1.30711	0.577395	0.318396	0.249437	0.0861151	-0.0956875
	4.99333	4.3392	3.33472	2.19956	1.25994	0.645742	0.381093	0.161315	-0.0794557	3.82249	2.70719	1.30762	0.576217	0.322999	0.254534	0.0802762	-0.0929648
	4.99667	4.34236	3.33605	2.19446	1.26141	0.640112	0.37815	0.168142	-0.0804666	3.82724	2.70701	1.30745	0.57532	0.321232	0.25209	0.0843795	-0.0927275
	5	4.34326	3.33403	2.20043	1.26406	0.647044	0.380253	0.167349	-0.0769564	3.82783	2.7122	1.30999	0.578651	0.323334	0.247187	0.0847411	-0.0923944
	5.00333	4.34517	3.33461	2.20092	1.2656	0.648661	0.379894	0.163583	-0.0784309	3.82298	2.71087	1.31075	0.574339	0.31828	0.255284	0.0858019	-0.0887294
	5.00667	4.34799	3.33862	2.20167	1.25742	0.648238	0.380126	0.16562	-0.0803649	3.83108	2.71104	1.31038	0.576076	0.319649	0.250068	0.0871793	-0.0931039
	5.01	4.34705	3.33354	2.19827	1.26171	0.654554	0.380694	0.162706	-0.0782455	3.82623	2.70833	1.3106	0.574511	0.319225	0.256391	0.0833172	-0.0912956
	5.01333	4.34354	3.33599	2.20059	1.26345	0.649972	0.379562	0.160581	-0.0770744	3.82814	2.70702	1.30907	0.577544	0.321044	0.249322	0.0816155	-0.0925464
	5.01667	4.34169	3.33705	2.19885	1.26171	0.643392	0.385033	0.16151	-0.079678	3.826	2.71181	1.30662	0.573017	0.321599	0.251514	0.0826177	-0.091342
	5.02	4.34273	3.33692	2.20145	1.26378	0.647881	0.381634	0.159641	-0.0766348	3.83048	2.70872	1.31385	0.577631	0.321802	0.249135	0.085372	-0.0952608
	5.02333	4.3438	3.34127	2.20725	1.26266	0.649551	0.381773	0.165441	-0.0776539	3.83004	2.71059	1.31024	0.579136	0.319868	0.251265	0.0812108	-0.0954895
	5.02667	4.34748	3.34198	2.20796	1.26257	0.643764	0.383177	0.161636	-0.0833021	3.83045	2.71191	1.31199	0.574697	0.316147	0.249915	0.0785725	-0.0925817
	5.03	4.35117	3.3416	2.2033	1.26382	0.649744	0.379089	0.163352	-0.0772337	3.82802	2.71238	1.31253	0.577889	0.319768	0.250857	0.0802529	-0.0927785
	5.03333	4.34925	3.34189	2.20414	1.26491	0.653625	0.385196	0.165476	-0.0773612	3.83341	2.71494	1.31436	0.577694	0.320356	0.250879	0.0808524	-0.0935542
	5.03667	4.34549	3.3329	2.20277	1.26242	0.648774	0.374686	0.166945	-0.0768295	3.83081	2.71677	1.31173	0.578549	0.319745	0.249652	0.084514	-0.0914539
	5.04	4.3468	3.34286	2.20415	1.266	0.649434	0.379818	0.165281	-0.0790793	3.8343	2.71719	1.31298	0.579243	0.318904	0.25427	0.0843041	-0.0960361
	5.04333	4.35111	3.34298	2.20166	1.26586	0.649694	0.378333	0.166298	-0.0788914	3.83072	2.71295	1.31406	0.578695	0.317947	0.249853	0.0829401	-0.0936061
	5.04667	4.34271	3.34505	2.2089	1.26431	0.65147	0.382273	0.166279	-0.0839353	3.83069	2.71368	1.31421	0.580494	0.316156	0.253772	0.080565	-0.089539
	5.05	4.35094	3.34592	2.20739	1.26713	0.649537	0.377866	0.164566	-0.0806719	3.83214	2.71441	1.31274	0.573798	0.319417	0.245286	0.0783287	-0.0968925
	5.05333	4.35301	3.34865	2.2061	1.26551	0.652159	0.382287	0.159677	-0.0778849	3.8311	2.71877	1.31526	0.579758	0.316951	0.252604	0.0837408	-0.0916974
	5.05667	4.34966	3.34308	2.20579	1.26751	0.646122	0.378997	0.166475	-0.0836669	3.8311	2.71975	1.31621	0.578094	0.321569	0.248397	0.0786743	-0.0904141
	5.06	4.35156	3.3489	2.20668	1.26886	0.651428	0.380946	0.165958	-0.0783234	3.83517	2.71755	1.31511	0.574119	0.317395	0.250769	0.0814869	-0.0974841
	5.06333	4.35464	3.34827	2.20796	1.27065	0.652833	0.38103	0.16138	-0.0784513	3.83702	2.72087	1.31745	0.576332	0.327462	0.250383	0.0830192	-0.0916864
	5.06667	4.35469	3.34918	2.20761	1.26587	0.649315	0.37959	0.161153	-0.0786796	3.83288	2.72118	1.31245	0.581354	0.320791	0.249583	0.0808475	-0.0950858
	5.07	4.3496	3.34662	2.20798	1.26328	0.650756	0.376453	0.16444	-0.0817948	3.83407	2.72051	1.31679	0.573739	0.315806	0.252092	0.0852581	-0.0941826
	5.07333	4.3528	3.34781	2.20946	1.26801	0.650831	0.380521	0.166727	-0.078276	3.8341	2.71998	1.3145	0.57783	0.319989	0.250912	0.0812431	-0.093623
	5.07667	4.35426	3.34481	2.21125	1.27302	0.653106	0.379197	0.166236	-0.079398	3.83964	2.7234	1.31001	0.577616	0.320006	0.252178	0.081529	-0.0965465
	5.08	4.35275	3.34952	2.21395	1.26866	0.651717	0.383463	0.168786	-0.0813975	3.83253	2.72332	1.31584	0.574671	0.319248	0.252871	0.0805185	-0.0933527
	5.08333	4.35875	3.35147	2.21502	1.26608	0.653472	0.378642	0.166317	-0.0740945	3.83671	2.72132	1.31521	0.579891	0.323749	0.25291	0.0824694	-0.0928215
	5.08667	4.35188	3.3511	2.21257	1.26546	0.650199	0.381074	0.164579	-0.0755154	3.84313	2.72694	1.31746	0.576351	0.317125	0.255846	0.0800223	-0.0965292
	5.09	4.35149	3.35216	2.21285	1.27002	0.64908	0.380367	0.164889	-0.0798305	3.83525	2.72151	1.31505	0.571222	0.317869	0.251448	0.084148	-0.0952217
	5.09333	4.35514	3.3494	2.21104	1.27145	0.64856	0.380576	0.167665	-0.0764936	3.83932	2.72857	1.32053	0.574801	0.316593	0.250418	0.0825238	-0.09417
	5.09667	4.35225	3.35535	2.21376	1.27005	0.652121	0.378524	0.16226	-0.0802782	3.83754	2.72752	1.31669	0.582705	0.320689	0.25195	0.0839674	-0.0956782
	5.1	4.36213	3.35303	2.21455	1.26766	0.649886	0.376695	0.164386	-0.0809389	3.84017	2.72641	1.319	0.578493	0.322144	0.249398	0.081814	-0.095552
	5.10333	4.3547	3.35718	2.21592	1.26966	0.651498	0.382014	0.165124	-0.0809357	3.84302	2.72535	1.32152	0.576905	0.321573	0.253693	0.0803784	-0.100741
	5.10667	4.35922	3.35693	2.21281	1.26985	0.65181	0.383845	0.165913	-0.0772468	3.84361	2.72999	1.32209	0.57697	0.32114	0.248636	0.0851884	-0.0974862
	5.11	4.3604	3.35198	2.21589	1.26799	0.651068	0.383273	0.166665	-0.083892	3.84244	2.7286	1.31532	0.576375	0.316435	0.253078	0.0821811	-0.0995792
	5.11333	4.35454	3.35646	2.21772	1.26998	0.651435	0.383364	0.163607	-0.0772763	3.84068	2.72833	1.31659	0.578488	0.316142	0.252561	0.0800818	-0.0954309
	5.11667	4.3581	3.35454	2.21564	1.27086	0.652194	0.379044	0.163826	-0.0822295	3.84271	2.7297	1.32088	0.578424	0.322388	0.249214	0.086617	-0.0964523
	5.12	4.35949	3.35345	2.21859	1.27212	0.652672	0.382759	0.166585	-0.0791026	3.84385	2.72989	1.32197	0.58109	0.320578	0.24924	0.0854584	-0.0941829
	5.12333	4.35546	3.35774	2.21822	1.27126	0.649909	0.382425	0.16822	-0.0826692	3.83836	2.73026	1.32364	0.582715	0.320467	0.248373	0.0782106	-0.0951258
	5.12667	4.36239	3.35427	2.21499	1.27171	0.649505	0.380893	0.167736	-0.0794501	3.84549	2.73099	1.32119	0.58014	0.319385	0.249306	0.0833545	-0.0953988
	5.13	4.3584	3.35711	2.22333	1.27137	0.652547	0.383106	0.163967	-0.0821055	3.84112	2.72947	1.32202	0.577469	0.316678	0.251386	0.0809388	-0.0898889
	5.13333	4.35423	3.35791	2.22047	1.27242	0.652479	0.384745	0.162849	-0.0816857	3.84296	2.7349	1.32754	0.579956	0.318144	0.250802	0.0807839	-0.09063
	5.13667	4.3619	3.35541	2.2216	1.27363	0.651858	0.386648	0.161924	-0.0747697	3.84024	2.7326	1.3209	0.577408	0.316619	0.254446	0.0814278	-0.0946497
	5.14	4.35969	3.35905	2.2219	1.27121	0.652879	0.380219	0.163885	-0.0801638	3.8414	2.73388	1.32422	0.580843	0.318393	0.249138	0.0812127	-0.096595
	5.14333	4.36182	3.35851	2.2225	1.27293	0.651146	0.385558	0.163099	-0.0802848	3.84828	2.73286	1.32265	0.580244	0.321163	0.249337	0.0806312	-0.0965831
	5.14667	4.36262	3.36071	2.22132	1.27611	0.651444	0.378535	0.166884	-0.0815088	3.84508	2.7348	1.32546	0.578603	0.314849	0.246626	0.0835816	-0.0949637
	5.15	4.36126	3.36686	2.22572	1.27233	0.647143	0.376729	0.164788	-0.0784905	3.84649	2.73409	1.31952	0.580943	0.324844	0.248839	0.0851239	-0.0938637
	5.15333	4.35996	3.36403	2.21761	1.27196	0.652462	0.380119	0.169957	-0.0862825	3.84665	2.73859	1.32409	0.576175	0.32276	0.247926	0.0824716	-0.0965431
	5.15667	4.36203	3.35868	2.22473	1.27296	0.65352	0.386072	0.164528	-0.086714	3.84644	2.73858	1.32836	0.577968	0.322911	0.24622	0.0827356	-0.0915703
	5.16	4.36346	3.36332	2.22666	1.27407	0.651111	0.382824	0.164806	-0.0780987	3.84487	2.73452	1.32569	0.582371	0.318595	0.248073	0.080071	-0.0959535
	5.16333	4.36627	3.36045	2.22653	1.27532	0.653057	0.384985	0.163223	-0.0804157	3.84579	2.73795	1.32361	0.578483	0.32082	0.250051	0.0796986	-0.0946163
	5.16667	4.36034	3.36101	2.22172	1.27606	0.656121	0.382358	0.166211	-0.0802184	3.84819	2.74236	1.32687	0.582434	0.320282	0.252839	0.0815419	-0.0954093
	5.17	4.36266	3.36155	2.22412	1.27619	0.652114	0.381829	0.163932	-0.0828599	3.85226	2.73623	1.32463	0.577222	0.319798	0.25074	0.0805062	-0.0942213
	5.17333	4.36309	3.36898	2.22648	1.27563	0.656073	0.38375	0.167517	-0.0806734	3.8469	2.73926	1.32561	0.579671	0.320174	0.24621	0.0785656	-0.0963133
	5.17667	4.36892	3.36472	2.23066	1.27693	0.651062	0.380552	0.164324	-0.0818206	3.85015	2.73711	1.32708	0.582398	0.318975	0.253484	0.0833069	-0.0962144
	5.18	4.36424	3.36675	2.22756	1.28098	0.652381	0.383294	0.166832	-0.0749521	3.84885	2.74327	1.33005	0.580781	0.322686	0.252266	0.0815999	-0.0939481
	5.18333	4.36417	3.36401	2.22616	1.28163	0.657638	0.381757	0.164022	-0.083472	3.85134	2.74003	1.33146	0.579402	0.321039	0.248934	0.0810203	-0.0943826
	5.18667	4.36451	3.36447	2.22633	1.27777	0.649913	0.384542	0.163936	-0.0797594	3.85323	2.74137	1.32987	0.582027	0.317786	0.251175	0.0849551	-0.0960665
	5.19	4.36533	3.36475	2.2291	1.27785	0.653919	0.377792	0.165522	-0.0833451	3.85407	2.74271	1.3281	0.580088	0.321964	0.249991	0.0821879	-0.0936523
	5.19333	4.36575	3.36895	2.22773	1.27756	0.65646	0.382855	0.166015	-0.080502	3.85397	2.74439	1.32561	0.581099	0.31949	0.251816	0.0797573	-0.100511
	5.19667	4.36262	3.36534	2.23022	1.2851	0.653599	0.380469	0.163315	-0.0803318	3.85051	2.74298	1.32987	0.580953	0.318507	0.246208	0.0791828	-0.0964973
	5.2	4.36821	3.36801	2.23256	1.27683	0.657376	0.382899	0.164243	-0.0822598	3.86017	2.7433	1.33104	0.578917	0.320511	0.251095	0.080508	-0.0963517
	5.20333	4.3679	3.37035	2.23002	1.27462	0.653901	0.383244	0.167987	-0.0777401	3.85648	2.74457	1.33292	0.58366	0.322544	0.254049	0.083372	-0.0935455
	5.20667	4.36949	3.37168	2.23288	1.27872	0.652543	0.386196	0.163926	-0.0841381	3.85587	2.74314	1.33176	0.577805	0.321075	0.251239	0.0838336	-0.0947465
	5.21	4.36783	3.36717	2.2333	1.27753	0.65152	0.384651	0.164413	-0.0795994	3.85372	2.74479	1.32866	0.585358	0.316461	0.253254	0.0825485	-0.0971072
	5.21333	4.37013	3.37063	2.2318	1.28065	0.658742	0.386618	0.160801	-0.07902	3.85199	2.74674	1.3336	0.580904	0.31662	0.250121	0.0831649	-0.0958782
	5.21667	4.36955	3.36939	2.23332	1.27911	0.648869	0.378093	0.166297	-0.0836786	3.85201	2.74789	1.33292	0.583091	0.317999	0.248274	0.077435	-0.100164
	5.22	4.37092	3.37266	2.23202	1.2837	0.652671	0.378924	0.166339	-0.0790543	3.85389	2.75201	1.33237	0.578567	0.323878	0.249659	0.0831907	-0.093323
	5.22333	4.36883	3.37014	2.23053	1.28336	0.651429	0.381361	0.159827	-0.0819299	3.85449	2.74756	1.33266	0.581521	0.318515	0.25601	0.079729	-0.0983361
	5.22667	4.36889	3.37234	2.23736	1.27635	0.649932	0.380718	0.162366	-0.082096	3.85628	2.74893	1.33048	0.579649	0.319948	0.254388	0.0830381	-0.100676
	5.23	4.37117	3.37273	2.23527	1.27729	0.652728	0.38513	0.16312	-0.0812528	3.85867	2.7495	1.33282	0.582649	0.32239	0.25042	0.0812154	-0.0974893
	5.23333	4.37272	3.37272	2.2352	1.28041	0.652811	0.382477	0.159881	-0.0820131	3.85895	2.75214	1.33366	0.580868	0.321648	0.25116	0.08114	-0.0977096
	5.23667	4.3674	3.37612	2.23615	1.28229	0.656699	0.381773	0.163754	-0.0829998	3.85424	2.75223	1.33496	0.584212	0.319577	0.25138	0.0794065	-0.0963474
	5.24	4.37101	3.37853	2.2317	1.28301	0.654186	0.383268	0.162749	-0.0821742	3.85772	2.75174	1.3345	0.584343	0.322685	0.251435	0.0761506	-0.0933768
	5.24333	4.37415	3.37652	2.23254	1.28212	0.653935	0.383016	0.161678	-0.0818706	3.85598	2.7495	1.33391	0.584273	0.321881	0.251167	0.083459	-0.0985144
	5.24667	4.37322	3.37376	2.23377	1.28244	0.654435	0.386697	0.164365	-0.0837631	3.85928	2.75183	1.33614	0.585123	0.317491	0.251052	0.0777815	-0.0968277
	5.25	4.37463	3.37607	2.23571	1.28214	0.653235	0.379736	0.166466	-0.077965	3.85881	2.75267	1.33535	0.579757	0.320016	0.252	0.079802	-0.0969423
	5.25333	4.37396	3.37576	2.24079	1.28232	0.655113	0.38158	0.162782	-0.0836238	3.85859	2.75552	1.33616	0.578751	0.321852	0.248308	0.0809668	-0.0932832
	5.25667	4.37763	3.37517	2.23519	1.28025	0.654803	0.381949	0.161251	-0.0833871	3.85846	2.75631	1.3348	0.584202	0.318826	0.24692	0.0836412	-0.103544
	5.26	4.37721	3.37748	2.2396	1.28503	0.657288	0.377868	0.163993	-0.0806315	3.86115	2.75523	1.33477	0.581895	0.31658	0.253877	0.0819702	-0.0982764
	5.26333	4.37521	3.382	2.24162	1.28148	0.657558	0.382974	0.161909	-0.0813999	3.86352	2.753	1.33826	0.582165	0.322208	0.248843	0.08148	-0.0967073
	5.26667	4.37861	3.37734	2.23683	1.28219	0.657869	0.379159	0.163255	-0.079886	3.86217	2.75923	1.34166	0.582693	0.319324	0.249318	0.082895	-0.095741
	5.27	4.37693	3.3764	2.24163	1.28186	0.65375	0.380775	0.164357	-0.081087	3.86062	2.75545	1.33824	0.583056	0.317432	0.247901	0.0835823	-0.0978831
	5.27333	4.37471	3.38321	2.24057	1.27916	0.653629	0.382975	0.162881	-0.0829637	3.86552	2.75826	1.33806	0.5815	0.322071	0.254411	0.0818217	-0.101966
	5.27667	4.37206	3.38209	2.24206	1.28257	0.655294	0.381089	0.165512	-0.08342	3.86428	2.75886	1.33847	0.584768	0.316844	0.253038	0.0785948	-0.0973063
	5.28	4.38133	3.38365	2.24417	1.28407	0.654718	0.381874	0.167191	-0.0807584	3.8634	2.75692	1.33659	0.580346	0.319675	0.249905	0.0821309	-0.0935466
	5.28333	4.37787	3.38276	2.24224	1.2825	0.654957	0.383689	0.163117	-0.0819976	3.86202	2.76125	1.33831	0.584277	0.319326	0.25267	0.0794225	-0.0959407
	5.28667	4.37787	3.38128	2.24009	1.2835	0.655879	0.385498	0.163555	-0.0831318	3.8618	2.76147	1.34259	0.581973	0.316715	0.251222	0.0787433	-0.0998992
	5.29	4.37798	3.38042	2.23944	1.28241	0.654283	0.377915	0.164823	-0.0813682	3.86596	2.75739	1.34099	0.578583	0.324232	0.249393	0.0833195	-0.0974129
	5.29333	4.37367	3.38442	2.24109	1.28929	0.656779	0.385197	0.161484	-0.0840166	3.8648	2.76197	1.33924	0.583724	0.318352	0.252378	0.0833952	-0.0967353
	5.29667	4.37849	3.38543	2.24279	1.28774	0.657895	0.379619	0.164784	-0.0825697	3.86028	2.75821	1.34157	0.582618	0.320028	0.250192	0.0790784	-0.0945113
	5.3	4.37252	3.38413	2.24198	1.28629	0.655911	0.382575	0.164929	-0.0851613	3.8616	2.75952	1.33836	0.582504	0.323619	0.250877	0.0808707	-0.0992274
	5.30333	4.37996	3.38253	2.24627	1.28755	0.65846	0.377168	0.161811	-0.0804924	3.86725	2.76179	1.34302	0.585374	0.319294	0.24859	0.0801517	-0.0957758
	5.30667	4.38456	3.38235	2.24645	1.28843	0.655326	0.384485	0.16446	-0.0825028	3.87025	2.75817	1.34127	0.588101	0.319088	0.256403	0.0798281	-0.0970728
	5.31	4.37998	3.38796	2.24249	1.29023	0.655999	0.385572	0.160848	-0.0858056	3.86523	2.76062	1.34595	0.583375	0.32145	0.252101	0.0797971	-0.0957628
	5.31333	4.38195	3.38875	2.24454	1.28548	0.65672	0.380086	0.162146	-0.0800982	3.8646	2.76534	1.34268	0.581066	0.31669	0.246721	0.0810746	-0.0993296
	5.31667	4.38345	3.38838	2.25281	1.28861	0.657265	0.377731	0.16216	-0.0860941	3.87138	2.77131	1.34068	0.581829	0.321732	0.251392	0.0792219	-0.0983719
	5.32	4.38073	3.38643	2.24588	1.28923	0.657269	0.382736	0.161068	-0.0851989	3.8634	2.76319	1.346	0.580781	0.319715	0.24975	0.0804926	-0.10186
	5.32333	4.3821	3.38616	2.24769	1.28989	0.651332	0.383559	0.162365	-0.0840784	3.87369	2.76562	1.3434	0.582401	0.320421	0.247618	0.0823016	-0.0963374
	5.32667	4.38287	3.3885	2.24486	1.29222	0.654455	0.380435	0.167093	-0.0835138	3.8688	2.76544	1.34699	0.58416	0.319828	0.248064	0.0808798	-0.0969249
	5.33	4.38075	3.39093	2.24696	1.28656	0.660773	0.384271	0.160398	-0.0835552	3.86976	2.76942	1.34076	0.584903	0.318636	0.24859	0.0812553	-0.0989412
	5.33333	4.37786	3.39081	2.25361	1.28732	0.656356	0.381724	0.160553	-0.0817245	3.87172	2.76512	1.34351	0.580613	0.325205	0.251742	0.0809338	-0.0986435
	5.33667	4.38219	3.38969	2.24771	1.29235	0.654841	0.38526	0.162605	-0.0813587	3.86845	2.76542	1.34323	0.58197	0.317107	0.250573	0.0807903	-0.095545
	5.34	4.38314	3.39216	2.25206	1.29058	0.659578	0.378828	0.161432	-0.0849916	3.869	2.7679	1.34435	0.585538	0.321373	0.248791	0.0849043	-0.0972634
	5.34333	4.38504	3.3909	2.24658	1.28781	0.653461	0.380091	0.164525	-0.0844694	3.86929	2.77038	1.34659	0.586341	0.318619	0.248818	0.0812614	-0.105315
	5.34667	4.38273	3.39101	2.24909	1.29166	0.657799	0.381318	0.168651	-0.0805747	3.86687	2.77512	1.34299	0.582995	0.320051	0.250585	0.0802333	-0.0984645
	5.35	4.38537	3.38615	2.24666	1.29222	0.65983	0.381964	0.161946	-0.084919	3.86953	2.76605	1.34192	0.58416	0.319434	0.251876	0.0794295	-0.0977314
	5.35333	4.38279	3.39185	2.25599	1.29147	0.662198	0.381386	0.160526	-0.0853832	3.87241	2.76538	1.34338	0.580623	0.316249	0.25359	0.0768813	-0.0956287
	5.35667	4.38393	3.39212	2.24725	1.29223	0.6581	0.383177	0.16606	-0.0836553	3.86826	2.77375	1.34967	0.585842	0.322023	0.249716	0.0779606	-0.0966363
	5.36	4.38303	3.39063	2.25072	1.28782	0.657062	0.386176	0.163855	-0.0835507	3.8777	2.77497	1.34778	0.581669	0.32408	0.252054	0.0812864	-0.0973419
	5.36333	4.38705	3.39342	2.24893	1.29208	0.655428	0.386824	0.164279	-0.0845192	3.87108	2.77397	1.35039	0.586044	0.319916	0.246523	0.0817174	-0.101593
	5.36667	4.38256	3.39424	2.25111	1.29417	0.655896	0.381118	0.165838	-0.0816647	3.86714	2.77081	1.34788	0.584541	0.315611	0.251203	0.0801939	-0.0988242
	5.37	4.38548	3.3904	2.25483	1.29222	0.657628	0.385186	0.162477	-0.0830599	3.87402	2.77198	1.34578	0.585237	0.320057	0.251326	0.0805318	-0.096957
	5.37333	4.39148	3.39516	2.25315	1.29526	0.660406	0.379112	0.162928	-0.0866686	3.87481	2.7735	1.35152	0.5847	0.321897	0.25194	0.0802362	-0.0971775
	5.37667	4.391	3.3919	2.25236	1.29332	0.659965	0.386115	0.165713	-0.0851434	3.87241	2.77354	1.35219	0.58577	0.325371	0.251178	0.080453	-0.0980039
	5.38	4.38888	3.39279	2.25857	1.29399	0.662989	0.382906	0.160601	-0.083773	3.87403	2.7758	1.3455	0.58846	0.318731	0.248816	0.0830566	-0.0974319
	5.38333	4.38544	3.40054	2.25617	1.29358	0.657738	0.381724	0.163292	-0.0840377	3.87855	2.7753	1.34771	0.582498	0.320421	0.248401	0.0851271	-0.0999631
	5.38667	4.38944	3.39289	2.26071	1.2948	0.656545	0.38171	0.163616	-0.0774487	3.87777	2.77526	1.34957	0.588011	0.315077	0.252642	0.0797882	-0.100122
	5.39	4.38675	3.40054	2.25768	1.29774	0.659707	0.386589	0.163531	-0.0826752	3.87677	2.77302	1.35036	0.584997	0.319524	0.249915	0.082643	-0.100505
	5.39333	4.38782	3.39608	2.2539	1.29392	0.662268	0.386521	0.163316	-0.0880597	3.8714	2.77959	1.35072	0.584298	0.318151	0.250336	0.0812753	-0.10035
	5.39667	4.38878	3.39373	2.26246	1.29535	0.65817	0.383097	0.165233	-0.0894112	3.87762	2.77764	1.35104	0.583032	0.321642	0.24888	0.0827464	-0.0987335
	5.4	4.3904	3.39963	2.25883	1.29464	0.657813	0.382494	0.162974	-0.083494	3.87886	2.78179	1.35115	0.586596	0.322248	0.24898	0.0806618	-0.100765
	5.40333	4.39116	3.40344	2.25823	1.2918	0.658085	0.384585	0.164823	-0.0808037	3.87922	2.78152	1.34936	0.586668	0.323727	0.24716	0.0767045	-0.0973687
	5.40667	4.3923	3.39864	2.25876	1.29436	0.657744	0.38428	0.162262	-0.0863127	3.87456	2.77747	1.35251	0.582531	0.3229	0.248773	0.0844628	-0.0975099
	5.41	4.38936	3.39634	2.25799	1.29446	0.656222	0.380375	0.164534	-0.082841	3.87821	2.78105	1.35206	0.587823	0.316713	0.252482	0.0789301	-0.0988085
	5.41333	4.39351	3.40032	2.25907	1.29877	0.659677	0.38331	0.164311	-0.0878015	3.87926	2.78291	1.34962	0.584633	0.316513	0.251287	0.0791414	-0.0970945
	5.41667	4.39633	3.39456	2.25984	1.29786	0.657545	0.385779	0.160909	-0.0868694	3.88114	2.78302	1.35321	0.585538	0.32369	0.248989	0.0810174	-0.100418
	5.42	4.39146	3.40138	2.25657	1.29838	0.655386	0.383812	0.167969	-0.080779	3.87996	2.78169	1.35156	0.586049	0.32434	0.24819	0.07971	-0.101669
	5.42333	4.39278	3.40319	2.25827	1.29513	0.657876	0.384175	0.168237	-0.0835105	3.88192	2.78406	1.3543	0.586519	0.318644	0.248591	0.0794468	-0.101334
	5.42667	4.39268	3.40197	2.25818	1.29254	0.657781	0.383085	0.164898	-0.0850025	3.87754	2.78028	1.35312	0.588309	0.321952	0.24986	0.0801697	-0.0985892
	5.43	4.39505	3.39843	2.26268	1.30018	0.657644	0.381606	0.161941	-0.0863369	3.87936	2.78373	1.35642	0.581136	0.318203	0.246446	0.0829776	-0.0990672
	5.43333	4.39393	3.40377	2.25929	1.29542	0.659097	0.386208	0.168984	-0.0850435	3.88306	2.7832	1.35491	0.585428	0.318004	0.248081	0.0788926	-0.101001
	5.43667	4.39597	3.4046	2.25914	1.29843	0.659944	0.382561	0.161682	-0.0847876	3.87931	2.7824	1.35509	0.588843	0.320532	0.248769	0.0823264	-0.101747
	5.44	4.39725	3.40642	2.26611	1.29909	0.661936	0.382566	0.159553	-0.0845976	3.88166	2.7802	1.35685	0.589002	0.316543	0.249453	0.0841319	-0.101127
	5.44333	4.39466	3.40438	2.26367	1.29372	0.658331	0.383829	0.169029	-0.086543	3.87974	2.78111	1.35773	0.589233	0.317592	0.25078	0.0824902	-0.100564
	5.44667	4.39939	3.40892	2.26671	1.30023	0.661241	0.379588	0.16247	-0.0818877	3.87842	2.78806	1.35146	0.584871	0.318753	0.247079	0.0846331	-0.103236
	5.45	4.39694	3.40513	2.26486	1.29935	0.657791	0.383612	0.164144	-0.0854865	3.88288	2.78895	1.35052	0.588098	0.32166	0.24969	0.0825579	-0.0982824
	5.45333	4.39532	3.40735	2.26787	1.2988	0.660135	0.387546	0.162591	-0.0826778	3.88425	2.78307	1.35756	0.585268	0.32037	0.250869	0.0803062	-0.100868
	5.45667	4.39198	3.40429	2.26291	1.29744	0.661355	0.385653	0.164393	-0.0815713	3.88185	2.78307	1.35721	0.587571	0.31997	0.247252	0.0769616	-0.102552
	5.46	4.39726	3.40779	2.26414	1.29774	0.656582	0.383847	0.16097	-0.0856088	3.88478	2.78691	1.35457	0.58653	0.318345	0.24777	0.0786824	-0.0992352
	5.46333	4.40297	3.40773	2.26569	1.30293	0.659818	0.380173	0.162871	-0.085942	3.88218	2.78973	1.35554	0.584493	0.318664	0.251344	0.081958	-0.0977874
	5.46667	4.39679	3.40755	2.26754	1.29931	0.660182	0.382053	0.166828	-0.0896722	3.88537	2.79423	1.36192	0.584327	0.318112	0.252176	0.0769191	-0.101863
	5.47	4.39836	3.40644	2.26787	1.3012	0.661904	0.386802	0.164876	-0.0853596	3.888	2.7888	1.35853	0.586187	0.319182	0.252391	0.0789587	-0.0991782
	5.47333	4.40029	3.40835	2.2646	1.29726	0.664983	0.380982	0.161229	-0.0840655	3.88472	2.7861	1.36208	0.586181	0.318868	0.251551	0.0821757	-0.103197
	5.47667	4.40024	3.41138	2.26675	1.30064	0.658042	0.384439	0.164547	-0.08551	3.88819	2.79337	1.35822	0.589369	0.321543	0.248922	0.0807859	-0.101328
	5.48	4.39769	3.4097	2.2671	1.30059	0.660668	0.384899	0.162406	-0.0869361	3.88915	2.78965	1.36175	0.584631	0.321906	0.248585	0.0861826	-0.0998939
	5.48333	4.40252	3.40976	2.27031	1.30389	0.656176	0.383437	0.162245	-0.0873213	3.8833	2.79108	1.35488	0.5873	0.323974	0.249387	0.0793719	-0.100988
	5.48667	4.39993	3.41203	2.26911	1.30086	0.660125	0.386119	0.167038	-0.0863424	3.88665	2.79498	1.35564	0.589062	0.3231	0.252352	0.0815087	-0.101218
	5.49	4.39658	3.41241	2.2732	1.30124	0.663328	0.38198	0.168381	-0.0839003	3.88481	2.79646	1.35964	0.589009	0.317125	0.248784	0.080654	-0.105822
	5.49333	4.39857	3.41275	2.26743	1.30033	0.664087	0.383369	0.163361	-0.0859162	3.88842	2.79606	1.35566	0.590607	0.320461	0.249514	0.0789485	-0.0989424
	5.49667	4.40007	3.41118	2.26821	1.30267	0.663321	0.386047	0.161791	-0.0848306	3.88644	2.79291	1.36099	0.587867	0.314984	0.250876	0.0814862	-0.100385
	5.5	4.40075	3.41164	2.27046	1.3037	0.658923	0.382546	0.164342	-0.0855909	3.8875	2.79815	1.36106	0.587213	0.318646	0.249455	0.0855882	-0.103726
	5.50333	4.40136	3.41225	2.27407	1.29873	0.660195	0.386013	0.164796	-0.0846551	3.89001	2.79262	1.35917	0.591777	0.324247	0.253899	0.0792001	-0.102218
	5.50667	4.39923	3.41642	2.27237	1.30452	0.658165	0.384995	0.160209	-0.0884886	3.88881	2.79961	1.36661	0.588105	0.316988	0.254546	0.0822937	-0.101364
	5.51	4.39804	3.41452	2.26985	1.30702	0.661424	0.382816	0.161177	-0.0900195	3.88859	2.79265	1.36008	0.589163	0.322119	0.250419	0.0804612	-0.104672
	5.51333	4.40152	3.41078	2.27232	1.30457	0.663455	0.388207	0.161741	-0.0882893	3.88805	2.79693	1.3637	0.584858	0.317471	0.250257	0.0807605	-0.0994367
	5.51667	4.40067	3.41466	2.27688	1.30467	0.664379	0.387432	0.163544	-0.0826434	3.88806	2.79625	1.36282	0.5861	0.323529	0.248316	0.0792287	-0.102079
	5.52	4.39711	3.41863	2.27104	1.30646	0.662652	0.382728	0.166667	-0.0851818	3.89344	2.79845	1.36311	0.588572	0.322291	0.246638	0.0825358	-0.104464
	5.52333	4.40287	3.41742	2.27618	1.30076	0.662528	0.388543	0.160484	-0.0855007	3.88955	2.79605	1.36696	0.588304	0.318128	0.247936	0.0821321	-0.099166
	5.52667	4.40229	3.41589	2.27643	1.30317	0.663899	0.386722	0.164137	-0.0872091	3.89142	2.79966	1.36059	0.590194	0.318803	0.251443	0.0779383	-0.100767
	5.53	4.40066	3.41701	2.27661	1.30773	0.66458	0.382155	0.163816	-0.0842908	3.89638	2.79619	1.36362	0.589626	0.320509	0.249271	0.0778593	-0.0995371
	5.53333	4.40038	3.41589	2.27489	1.30481	0.65867	0.383312	0.164363	-0.084406	3.88978	2.8007	1.36917	0.589453	0.318585	0.246811	0.0786781	-0.099824
	5.53667	4.40361	3.42106	2.27437	1.30504	0.662635	0.383212	0.163832	-0.0870731	3.89352	2.79884	1.36691	0.591262	0.320537	0.247244	0.0781375	-0.096348
	5.54	4.40444	3.41628	2.27736	1.30834	0.664194	0.382984	0.163421	-0.0880496	3.89494	2.80383	1.36784	0.58867	0.325241	0.248485	0.0790585	-0.100807
	5.54333	4.40664	3.41889	2.27649	1.30715	0.658509	0.381859	0.166457	-0.0874019	3.89168	2.79832	1.36867	0.583485	0.319216	0.250751	0.0790953	-0.100679
	5.54667	4.40762	3.41877	2.27834	1.30662	0.662803	0.382944	0.165774	-0.0891383	3.89635	2.80425	1.36934	0.590502	0.321819	0.246429	0.0789239	-0.100417
	5.55	4.40377	3.41694	2.27449	1.30836	0.6593	0.386646	0.16057	-0.086813	3.89656	2.80569	1.36484	0.589393	0.319688	0.253418	0.0785949	-0.100671
	5.55333	4.40754	3.41952	2.28156	1.31013	0.663237	0.383784	0.164859	-0.0847976	3.89399	2.80367	1.36924	0.582806	0.315152	0.246898	0.0776717	-0.100313
	5.55667	4.40781	3.42486	2.27321	1.30738	0.661355	0.384093	0.163768	-0.0877539	3.89694	2.80539	1.36734	0.592023	0.318737	0.248156	0.078856	-0.102328
	5.56	4.40449	3.42055	2.28255	1.30748	0.664937	0.38818	0.159152	-0.0892538	3.89791	2.80536	1.3654	0.593054	0.324201	0.247558	0.076325	-0.102873
	5.56333	4.4058	3.42484	2.28218	1.30995	0.664506	0.381743	0.163255	-0.0843462	3.89401	2.80544	1.36925	0.593026	0.320937	0.249116	0.0791697	-0.10389
	5.56667	4.41088	3.42028	2.27951	1.31241	0.661883	0.384199	0.166349	-0.0911754	3.89545	2.8078	1.3682	0.592775	0.321912	0.251337	0.0797444	-0.101654
	5.57	4.40475	3.42343	2.28417	1.30827	0.66519	0.384095	0.164994	-0.0863186	3.89551	2.80683	1.36822	0.590263	0.318291	0.252214	0.0788697	-0.103761
	5.57333	4.40863	3.42459	2.28101	1.30857	0.667694	0.385449	0.161777	-0.0884003	3.89726	2.80491	1.36893	0.58798	0.321231	0.254185	0.0782927	-0.0984292
	5.57667	4.41296	3.42651	2.2839	1.30662	0.661171	0.383523	0.163948	-0.0822023	3.89908	2.80753	1.36898	0.586266	0.323447	0.249454	0.0785794	-0.102964
	5.58	4.41355	3.42389	2.28171	1.31088	0.659572	0.385701	0.164959	-0.0850325	3.89357	2.80789	1.37081	0.590524	0.319906	0.253795	0.0790629	-0.102461
	5.58333	4.41022	3.42288	2.28163	1.30802	0.662998	0.386195	0.165026	-0.0907611	3.89596	2.81053	1.37114	0.587774	0.31863	0.250236	0.0794151	-0.101978
	5.58667	4.41007	3.42436	2.28484	1.30972	0.66694	0.384261	0.163904	-0.0870291	3.90016	2.80896	1.37006	0.587386	0.324032	0.25277	0.0828261	-0.101996
	5.59	4.41368	3.42374	2.28024	1.31065	0.66403	0.384685	0.163081	-0.0902947	3.89849	2.80999	1.37067	0.592518	0.321816	0.249104	0.0772723	-0.104039
	5.59333	4.40839	3.42264	2.2859	1.30543	0.661338	0.381756	0.161086	-0.0860435	3.89883	2.81105	1.37059	0.58965	0.322548	0.250315	0.0787061	-0.105761
	5.59667	4.41386	3.42722	2.28738	1.31226	0.664359	0.384283	0.167129	-0.0853552	3.90172	2.80849	1.37448	0.588833	0.32028	0.24901	0.0804773	-0.101234
	5.6	4.40812	3.42598	2.28565	1.31325	0.663348	0.384675	0.163502	-0.0831292	3.90015	2.80913	1.37021	0.587875	0.323947	0.250376	0.0817257	-0.104315
	5.60333	4.41064	3.42651	2.28192	1.31419	0.66431	0.386171	0.162414	-0.0891594	3.89823	2.81617	1.37365	0.588167	0.317722	0.253964	0.0779744	-0.10538
	5.60667	4.416	3.42689	2.2899	1.31168	0.666034	0.386548	0.162549	-0.0846441	3.90447	2.81614	1.37082	0.589012	0.324295	0.248627	0.0791796	-0.105161
	5.61	4.4113	3.42985	2.28829	1.31619	0.66516	0.385187	0.165271	-0.090917	3.90068	2.81449	1.37201	0.591899	0.316782	0.252612	0.078758	-0.10408
	5.61333	4.41529	3.42566	2.28753	1.30965	0.660707	0.388365	0.163158	-0.0847322	3.90132	2.811	1.37649	0.588023	0.320417	0.24806	0.076712	-0.108567
	5.61667	4.41237	3.43432	2.28869	1.31074	0.670374	0.380814	0.159475	-0.0860308	3.90149	2.80727	1.37516	0.590996	0.323683	0.246831	0.0807054	-0.0997898
	5.62	4.40988	3.42889	2.28486	1.31342	0.666725	0.381786	0.164684	-0.087481	3.90004	2.81713	1.37536	0.593643	0.319397	0.254443	0.0796292	-0.100961
	5.62333	4.41662	3.4324	2.28517	1.31396	0.664765	0.37938	0.167017	-0.0914002	3.90273	2.81823	1.37286	0.590514	0.32055	0.252476	0.0798675	-0.103016
	5.62667	4.41516	3.43356	2.28831	1.3126	0.666475	0.388608	0.161899	-0.0862786	3.90485	2.81545	1.37326	0.591255	0.318479	0.250825	0.0769451	-0.0993415
	5.63	4.4135	3.43325	2.29081	1.31711	0.663944	0.382976	0.161921	-0.0883517	3.90113	2.8139	1.37998	0.591765	0.317283	0.249339	0.0820591	-0.101355
	5.63333	4.41362	3.43451	2.29401	1.312	0.660878	0.387983	0.164101	-0.0839793	3.9043	2.81266	1.37605	0.591015	0.31994	0.249414	0.0823039	-0.101468
	5.63667	4.41552	3.43103	2.28959	1.31116	0.664585	0.385489	0.160568	-0.0884476	3.9026	2.81287	1.37693	0.589069	0.320678	0.250809	0.0829694	-0.101675
	5.64	4.4155	3.43252	2.29103	1.31671	0.666871	0.38549	0.164383	-0.0876911	3.90414	2.82102	1.38159	0.591601	0.319539	0.248331	0.077503	-0.102095
	5.64333	4.41331	3.43404	2.2874	1.31723	0.667976	0.38449	0.166959	-0.0901011	3.90567	2.81792	1.37605	0.594449	0.322888	0.248784	0.0808797	-0.104452
	5.64667	4.41547	3.43718	2.2917	1.3179	0.664837	0.384177	0.168085	-0.089272	3.90636	2.81855	1.37473	0.5934	0.317843	0.249195	0.0752089	-0.103283
	5.65	4.41473	3.43625	2.29067	1.3147	0.666943	0.385139	0.162996	-0.0868002	3.90527	2.82073	1.37938	0.592792	0.320926	0.24651	0.0830033	-0.103029
	5.65333	4.41456	3.43685	2.29217	1.31789	0.663908	0.383218	0.164068	-0.0861568	3.90847	2.82064	1.37982	0.591258	0.318852	0.254628	0.0785106	-0.10652
	5.65667	4.41773	3.43608	2.29541	1.31225	0.662379	0.384405	0.163968	-0.0867941	3.90681	2.81714	1.37818	0.593443	0.32199	0.250928	0.0789465	-0.104551
	5.66	4.41637	3.43575	2.29548	1.31782	0.666867	0.386487	0.166524	-0.0892137	3.90768	2.82278	1.378	0.590621	0.319332	0.252519	0.0798622	-0.103308
	5.66333	4.41794	3.43844	2.29106	1.31535	0.664835	0.381343	0.164229	-0.0912542	3.90337	2.82039	1.37676	0.592603	0.319702	0.252148	0.0795818	-0.102933
	5.66667	4.41766	3.43796	2.29122	1.31574	0.665732	0.388014	0.161302	-0.0859825	3.90633	2.82572	1.37843	0.589365	0.318169	0.248254	0.0786194	-0.101873
	5.67	4.4164	3.43785	2.29367	1.31768	0.666019	0.386625	0.163773	-0.088534	3.91291	2.82664	1.37949	0.592021	0.325195	0.250803	0.0809132	-0.10475
	5.67333	4.42108	3.43824	2.29347	1.31525	0.66753	0.383153	0.164869	-0.0904624	3.90719	2.81881	1.37791	0.594823	0.321048	0.253797	0.077456	-0.102303
	5.67667	4.41648	3.43476	2.29427	1.31874	0.663682	0.386	0.162917	-0.08863	3.90924	2.82859	1.3797	0.591601	0.31948	0.248754	0.0777687	-0.101242
	5.68	4.42174	3.43677	2.29736	1.31505	0.667719	0.381996	0.164544	-0.0875996	3.90977	2.82453	1.37998	0.586939	0.320375	0.251458	0.0762378	-0.102355
	5.68333	4.42295	3.44036	2.29995	1.31834	0.665904	0.387003	0.164379	-0.0886111	3.90733	2.82305	1.38174	0.594708	0.319779	0.250474	0.0816603	-0.104861
	5.68667	4.42044	3.43709	2.3004	1.3149	0.665714	0.385805	0.161977	-0.0909035	3.90326	2.82282	1.37744	0.588528	0.318459	0.248457	0.0789492	-0.106348
	5.69	4.42507	3.43946	2.29819	1.31605	0.668251	0.385724	0.163821	-0.0850028	3.90982	2.82855	1.38347	0.595131	0.322366	0.251262	0.0785202	-0.108941
	5.69333	4.41965	3.4418	2.30079	1.31805	0.668535	0.386531	0.16629	-0.0900996	3.90744	2.82231	1.385	0.592189	0.31921	0.252159	0.0853452	-0.105738
	5.69667	4.42478	3.44049	2.29989	1.31885	0.669868	0.384738	0.159852	-0.0912631	3.91439	2.82571	1.38256	0.594318	0.321592	0.248615	0.0756684	-0.105984
	5.7	4.41981	3.43971	2.29926	1.3167	0.663884	0.389214	0.16741	-0.0847357	3.90636	2.82766	1.38113	0.592818	0.320314	0.249832	0.0794948	-0.104301
	5.70333	4.42388	3.44005	2.29955	1.31783	0.665343	0.384389	0.163299	-0.0875145	3.91168	2.82349	1.38467	0.595551	0.322678	0.2459	0.0794468	-0.102896
	5.70667	4.42141	3.4429	2.30152	1.31917	0.664793	0.383135	0.160713	-0.0892271	3.90931	2.82742	1.38557	0.594357	0.32179	0.250694	0.0796107	-0.103783
	5.71	4.41869	3.44205	2.29712	1.31482	0.668691	0.384114	0.165153	-0.0892848	3.91384	2.82886	1.38172	0.593766	0.320055	0.243549	0.0797028	-0.105566
	5.71333	4.41918	3.44382	2.30023	1.32015	0.669423	0.385639	0.160419	-0.0861931	3.91033	2.83385	1.38462	0.593114	0.321848	0.252569	0.0779666	-0.108031
	5.71667	4.42235	3.44584	2.30448	1.32003	0.664973	0.389345	0.163395	-0.0903019	3.91575	2.83461	1.39003	0.591545	0.32336	0.250055	0.0856089	-0.103484
	5.72	4.42454	3.43982	2.30315	1.32069	0.664258	0.381726	0.16262	-0.0862488	3.9126	2.83017	1.38484	0.592519	0.319776	0.246436	0.0794605	-0.106855
	5.72333	4.42597	3.44629	2.29961	1.32062	0.670417	0.389733	0.163842	-0.0927898	3.91373	2.83441	1.38461	0.595831	0.322113	0.252187	0.0834801	-0.102802
	5.72667	4.42907	3.44858	2.29858	1.32453	0.666734	0.386767	0.165132	-0.0892303	3.91414	2.83036	1.38465	0.594783	0.321339	0.249808	0.0790212	-0.107316
	5.73	4.42518	3.44839	2.30223	1.32055	0.664751	0.386582	0.165391	-0.0884134	3.9199	2.83138	1.38631	0.594791	0.323989	0.249284	0.0770918	-0.105939
	5.73333	4.42159	3.44413	2.30536	1.32263	0.670437	0.38795	0.166071	-0.0866153	3.91121	2.83337	1.38492	0.596127	0.321867	0.247643	0.0777299	-0.104069
	5.73667	4.42371	3.44597	2.30284	1.31896	0.667524	0.389682	0.165691	-0.0932402	3.91811	2.83396	1.38529	0.591466	0.323568	0.250849	0.0799224	-0.103602
	5.74	4.42822	3.44699	2.30697	1.32202	0.669154	0.386545	0.168083	-0.0888229	3.91452	2.83226	1.38558	0.59103	0.319567	0.248805	0.0788173	-0.10443
	5.74333	4.42262	3.44638	2.30353	1.31851	0.670132	0.385796	0.164326	-0.0905691	3.91526	2.83522	1.39028	0.590626	0.319831	0.251901	0.0804893	-0.104542
	5.74667	4.43086	3.44578	2.30246	1.32194	0.67128	0.385932	0.166821	-0.0891841	3.91728	2.83424	1.3859	0.589624	0.322015	0.249344	0.0830994	-0.105311
	5.75	4.42613	3.44545	2.30603	1.32384	0.665583	0.389221	0.162446	-0.0913234	3.91811	2.8352	1.38702	0.5955	0.316092	0.249196	0.0806821	-0.106581
	5.75333	4.42518	3.44999	2.30579	1.32098	0.671047	0.388997	0.16303	-0.0916454	3.91606	2.83914	1.38615	0.597302	0.320726	0.254469	0.0790341	-0.10204
	5.75667	4.42647	3.4525	2.30333	1.32031	0.666805	0.386584	0.165455	-0.0924873	3.91556	2.83478	1.38939	0.599453	0.318703	0.24982	0.0765493	-0.10383
	5.76	4.42642	3.44901	2.30811	1.32611	0.667001	0.38368	0.160861	-0.0953733	3.91801	2.84034	1.39136	0.596873	0.320409	0.247596	0.0754835	-0.107866
	5.76333	4.42516	3.44938	2.31226	1.32626	0.670129	0.38504	0.16076	-0.0921092	3.91604	2.83889	1.38844	0.595786	0.323112	0.253477	0.0789591	-0.10806
	5.76667	4.43026	3.45342	2.31051	1.32031	0.667676	0.385692	0.164071	-0.0915002	3.91927	2.83425	1.38911	0.594138	0.32196	0.251308	0.0818428	-0.103522
	5.77	4.43048	3.45454	2.30635	1.32595	0.674698	0.384568	0.165104	-0.0876751	3.92285	2.83769	1.3906	0.595135	0.321323	0.251006	0.0797862	-0.105122
	5.77333	4.42785	3.44974	2.30708	1.32436	0.67139	0.387313	0.159889	-0.0919588	3.9179	2.84063	1.39571	0.59122	0.319353	0.244297	0.077415	-0.102297
	5.77667	4.42979	3.45107	2.3085	1.32266	0.66671	0.386528	0.163909	-0.0924557	3.91892	2.84074	1.38926	0.595121	0.317143	0.244966	0.0793615	-0.103982
	5.78	4.43367	3.45006	2.30564	1.32432	0.6733	0.388406	0.166072	-0.0884632	3.91755	2.84159	1.39111	0.599169	0.320659	0.251222	0.0762198	-0.104636
	5.78333	4.42928	3.4535	2.31518	1.32557	0.66828	0.386184	0.164117	-0.0887462	3.92325	2.83935	1.39331	0.597114	0.322839	0.246983	0.0792111	-0.103141
	5.78667	4.42902	3.45445	2.31003	1.3252	0.667534	0.389359	0.167779	-0.0894129	3.92204	2.84025	1.39173	0.59322	0.327807	0.25142	0.0819001	-0.103831
	5.79	4.43006	3.45671	2.31137	1.32395	0.672525	0.38818	0.163515	-0.0927805	3.92004	2.84166	1.39087	0.590395	0.319307	0.251165	0.0802872	-0.108976
	5.79333	4.43008	3.45443	2.3132	1.32271	0.667957	0.38976	0.158238	-0.0889915	3.91846	2.83975	1.39237	0.591606	0.3186	0.252317	0.0806262	-0.106457
	5.79667	4.43063	3.45312	2.30833	1.32546	0.667169	0.386928	0.166224	-0.0902048	3.91799	2.84179	1.39149	0.593035	0.321662	0.2524	0.0774667	-0.104373
	5.8	4.43401	3.45566	2.30812	1.32489	0.669141	0.390202	0.163846	-0.092117	3.91874	2.84193	1.39486	0.598758	0.320896	0.249692	0.0788631	-0.11031
	5.80333	4.43083	3.45748	2.3138	1.32606	0.670204	0.387668	0.165932	-0.0926035	3.92046	2.84261	1.39257	0.595169	0.321895	0.252041	0.0758152	-0.107005
	5.80667	4.43046	3.45587	2.30893	1.32576	0.669167	0.38563	0.163371	-0.0913776	3.92519	2.84108	1.38986	0.594209	0.322313	0.248215	0.082364	-0.102353
	5.81	4.43699	3.45361	2.31478	1.33219	0.671192	0.382963	0.163744	-0.0869902	3.92417	2.84616	1.39137	0.596089	0.318561	0.244828	0.0764111	-0.105576
	5.81333	4.43509	3.45733	2.31271	1.32941	0.670052	0.385028	0.162744	-0.0916649	3.92466	2.84238	1.39515	0.589833	0.319908	0.25014	0.0773741	-0.103584
	5.81667	4.43525	3.45814	2.31424	1.32582	0.67435	0.385311	0.163448	-0.0930052	3.92703	2.84485	1.39612	0.595455	0.320196	0.250314	0.0759866	-0.106304
	5.82	4.43254	3.46002	2.3098	1.32787	0.671122	0.387677	0.165255	-0.0879775	3.92462	2.8424	1.39526	0.598855	0.320926	0.249764	0.0775189	-0.105442
	5.82333	4.43159	3.45308	2.31594	1.32783	0.673993	0.388803	0.163788	-0.0902359	3.92441	2.8517	1.39722	0.594871	0.317736	0.248481	0.0786859	-0.107461
	5.82667	4.43596	3.45497	2.31588	1.32668	0.673828	0.386772	0.162791	-0.0926998	3.92788	2.84903	1.39457	0.59218	0.325072	0.250533	0.0817603	-0.109727
	5.83	4.43506	3.45869	2.31497	1.32667	0.669977	0.390359	0.162804	-0.0907236	3.92358	2.84123	1.39519	0.598187	0.320803	0.2457	0.0790916	-0.105501
	5.83333	4.43875	3.46157	2.31274	1.3337	0.670906	0.391568	0.161213	-0.0906797	3.9209	2.84805	1.39498	0.599368	0.320852	0.250967	0.0805483	-0.102911
	5.83667	4.43477	3.46133	2.31767	1.32569	0.673325	0.387269	0.16379	-0.084792	3.92603	2.84804	1.39769	0.591274	0.324676	0.249276	0.0800504	-0.105385
	5.84	4.43935	3.45883	2.31569	1.33081	0.66586	0.388729	0.161096	-0.0902257	3.92647	2.84542	1.3984	0.597495	0.321435	0.247526	0.0754939	-0.108973
	5.84333	4.43653	3.45758	2.31506	1.32823	0.671528	0.384225	0.163247	-0.0888707	3.92611	2.85115	1.4035	0.594004	0.318534	0.249233	0.0764478	-0.101845
	5.84667	4.43383	3.46568	2.31695	1.33266	0.667019	0.389149	0.163854	-0.0895277	3.92857	2.85316	1.39397	0.598705	0.323953	0.252981	0.0796679	-0.105243
	5.85	4.43436	3.46711	2.31845	1.33573	0.671788	0.386828	0.164436	-0.0870896	3.92535	2.85357	1.39634	0.599244	0.321327	0.248839	0.0777553	-0.106361
	5.85333	4.4384	3.46656	2.31621	1.33044	0.676071	0.386127	0.163044	-0.0881991	3.92191	2.85023	1.39487	0.595155	0.316005	0.248293	0.0785892	-0.105794
	5.85667	4.4364	3.46018	2.31796	1.32653	0.673418	0.386189	0.161635	-0.0908218	3.92767	2.85011	1.40085	0.600219	0.323709	0.255787	0.0782643	-0.107054
	5.86	4.43612	3.46109	2.31863	1.33143	0.670621	0.391347	0.162104	-0.0918077	3.92586	2.85406	1.39851	0.594685	0.323412	0.251152	0.0785649	-0.109003
	5.86333	4.43849	3.46014	2.3189	1.33214	0.672235	0.386646	0.164331	-0.0925105	3.92759	2.85611	1.39892	0.596827	0.319488	0.249473	0.0824209	-0.111624
	5.86667	4.43898	3.46261	2.31965	1.33547	0.670439	0.386058	0.164469	-0.0907518	3.92992	2.85401	1.39924	0.59218	0.316618	0.246734	0.0779086	-0.107578
	5.87	4.43511	3.46928	2.32355	1.33313	0.673556	0.389536	0.165969	-0.0924339	3.92419	2.85159	1.40029	0.596221	0.32071	0.248212	0.0758828	-0.106789
	5.87333	4.43426	3.46719	2.3184	1.33341	0.670766	0.387075	0.164685	-0.0907857	3.92906	2.8565	1.39828	0.5946	0.321065	0.252346	0.0763862	-0.107362
	5.87667	4.43837	3.46481	2.32304	1.33069	0.669908	0.384566	0.169583	-0.0935186	3.92911	2.85565	1.40307	0.592937	0.319765	0.24968	0.0813802	-0.106228
	5.88	4.43845	3.46605	2.31974	1.33577	0.674077	0.38993	0.162248	-0.0864591	3.92925	2.85985	1.39992	0.592744	0.318713	0.251473	0.0738017	-0.107622
	5.88333	4.44278	3.46585	2.32306	1.33728	0.672687	0.387466	0.162005	-0.0947789	3.93065	2.85374	1.40106	0.598738	0.320001	0.252013	0.0791503	-0.107693
	5.88667	4.44379	3.46432	2.32087	1.33725	0.677866	0.388038	0.165204	-0.092294	3.93092	2.85613	1.4009	0.595746	0.317137	0.249625	0.0777582	-0.104389
	5.89	4.44141	3.47013	2.32092	1.33782	0.675064	0.389641	0.160579	-0.0908474	3.92908	2.85604	1.40484	0.596795	0.317419	0.249669	0.0783466	-0.106023
	5.89333	4.44504	3.46856	2.32437	1.33768	0.673133	0.390273	0.167593	-0.0905951	3.93178	2.85727	1.40348	0.594487	0.319068	0.248855	0.0832369	-0.109538
	5.89667	4.4385	3.47363	2.32172	1.33386	0.67507	0.387155	0.163853	-0.0950792	3.93569	2.85382	1.40332	0.598426	0.320198	0.249563	0.0774722	-0.109755
	5.9	4.44014	3.46637	2.32768	1.32912	0.674232	0.387347	0.163922	-0.0899364	3.93148	2.85722	1.40024	0.59483	0.318634	0.250188	0.0778594	-0.10487
	5.90333	4.44511	3.46961	2.32472	1.33427	0.672532	0.390827	0.160292	-0.0940987	3.93513	2.85885	1.40502	0.601127	0.323979	0.251868	0.0793172	-0.106158
	5.90667	4.44	3.46994	2.32474	1.33329	0.676586	0.390228	0.164167	-0.0926431	3.93353	2.85954	1.40645	0.598181	0.321024	0.249104	0.0756746	-0.107526
	5.91	4.44103	3.46744	2.32783	1.33562	0.672442	0.38794	0.166669	-0.0898526	3.93083	2.86189	1.40069	0.596421	0.320374	0.249314	0.0810869	-0.102336
	5.91333	4.44417	3.47168	2.32918	1.34021	0.672255	0.388972	0.166379	-0.0925832	3.93032	2.85546	1.40563	0.595858	0.321191	0.248897	0.0833286	-0.106063
	5.91667	4.44329	3.47388	2.32675	1.33592	0.676557	0.388462	0.160487	-0.092302	3.93909	2.85656	1.40323	0.601285	0.320307	0.249896	0.0809686	-0.104973
	5.92	4.44133	3.46857	2.32563	1.33702	0.670197	0.386737	0.165102	-0.0904254	3.9321	2.86252	1.40733	0.597835	0.320094	0.248262	0.0833213	-0.107006
	5.92333	4.44543	3.47024	2.33088	1.33602	0.672829	0.38769	0.165147	-0.0936956	3.93489	2.86306	1.40729	0.596889	0.326211	0.247963	0.0817774	-0.106638
	5.92667	4.44186	3.47525	2.32659	1.33438	0.670362	0.386432	0.160452	-0.0923727	3.92916	2.86335	1.40677	0.600946	0.320808	0.245311	0.0787349	-0.108498
	5.93	4.44275	3.47578	2.3262	1.33811	0.673067	0.392271	0.165906	-0.0892644	3.93658	2.86317	1.40691	0.596345	0.316539	0.254016	0.0795503	-0.105647
	5.93333	4.4448	3.47197	2.32756	1.33795	0.674471	0.387934	0.159463	-0.0930125	3.93282	2.85737	1.41015	0.594311	0.319691	0.249474	0.0791749	-0.111491
	5.93667	4.44822	3.4746	2.32829	1.33731	0.670455	0.388074	0.160111	-0.0942563	3.93584	2.8638	1.40646	0.598394	0.321992	0.252801	0.0753863	-0.10951
	5.94	4.44172	3.47429	2.32666	1.33593	0.674071	0.387238	0.160383	-0.0939382	3.93499	2.86626	1.40716	0.600539	0.320448	0.250097	0.0774177	-0.108011
	5.94333	4.44851	3.47169	2.33027	1.33832	0.669842	0.386164	0.165152	-0.0945646	3.937	2.86335	1.40992	0.59414	0.32336	0.249851	0.0744121	-0.110659
	5.94667	4.44779	3.48092	2.33218	1.33546	0.675015	0.389251	0.160657	-0.0935406	3.93658	2.86538	1.40794	0.600815	0.324335	0.252	0.0795878	-0.106802
	5.95	4.44538	3.47376	2.33254	1.34084	0.673368	0.387386	0.162278	-0.0886468	3.93475	2.86548	1.40701	0.59773	0.323057	0.254461	0.0799196	-0.106329
	5.95333	4.44682	3.47541	2.33222	1.33448	0.676374	0.392482	0.162326	-0.0896778	3.93574	2.86252	1.4109	0.597427	0.31819	0.250193	0.0761461	-0.110059
	5.95667	4.44492	3.47489	2.32977	1.33661	0.671708	0.388534	0.164899	-0.0887258	3.93551	2.86474	1.40886	0.600805	0.318026	0.249297	0.0768549	-0.103465
	5.96	4.4492	3.47579	2.33683	1.34118	0.6722	0.391024	0.161449	-0.0938383	3.94164	2.86611	1.41102	0.600773	0.318591	0.247967	0.0765422	-0.101734
	5.96333	4.44737	3.47574	2.33136	1.33947	0.676988	0.383783	0.164617	-0.0924143	3.93919	2.86829	1.41079	0.597354	0.323243	0.244973	0.0778405	-0.112254
	5.96667	4.44879	3.47729	2.33463	1.33679	0.677595	0.389735	0.163172	-0.093276	3.93983	2.87022	1.40662	0.596243	0.319759	0.249753	0.0783684	-0.107995
	5.97	4.44593	3.47904	2.33589	1.33985	0.672735	0.385665	0.161661	-0.09381	3.93557	2.86858	1.40908	0.5996	0.320462	0.249354	0.0803569	-0.109672
	5.97333	4.44668	3.47735	2.33171	1.34188	0.676093	0.384716	0.165826	-0.0901654	3.93987	2.8756	1.41008	0.595821	0.32205	0.248115	0.0826919	-0.106824
	5.97667	4.45151	3.47926	2.33618	1.34336	0.671412	0.391362	0.162407	-0.0932531	3.94303	2.87283	1.41092	0.60073	0.3215	0.247105	0.0772626	-0.106802
	5.98	4.45277	3.47855	2.33738	1.34116	0.673657	0.387788	0.163432	-0.0958228	3.93514	2.87227	1.41197	0.600548	0.321321	0.249651	0.0797193	-0.107673
	5.98333	4.45021	3.47776	2.33495	1.34102	0.675409	0.387045	0.165215	-0.0959504	3.93604	2.87059	1.41037	0.599212	0.321462	0.251175	0.0824221	-0.103387
	5.98667	4.44867	3.48036	2.33796	1.33877	0.675461	0.387839	0.163613	-0.0953716	3.93769	2.87005	1.41319	0.598971	0.321907	0.247852	0.0782326	-0.110468
	5.99	4.44928	3.48396	2.33934	1.34117	0.675731	0.386397	0.165411	-0.089551	3.93948	2.86969	1.40921	0.599826	0.318929	0.249827	0.0783897	-0.107697
	5.99333	4.45053	3.48479	2.33711	1.3411	0.674339	0.391108	0.164008	-0.091832	3.93979	2.87467	1.40864	0.600239	0.317419	0.247963	0.0809519	-0.106824
	5.99667	4.44742	3.4835	2.33474	1.34305	0.678341	0.388261	0.164924	-0.0950823	3.93972	2.86952	1.40879	0.599445	0.31838	0.246899	0.0808925	-0.106682
	6	4.45099	3.47792	2.33639	1.34601	0.676336	0.39188	0.163659	-0.0952451	3.93958	2.87069	1.41444	0.598519	0.319776	0.248114	0.080279	-0.11166
	6.00333	4.44993	3.48753	2.34206	1.34359	0.669693	0.391111	0.164915	-0.0911483	3.94217	2.87342	1.4129	0.599231	0.318191	0.249897	0.0772524	-0.111192
	6.00667	4.45063	3.48689	2.33888	1.34141	0.673439	0.389308	0.162421	-0.0933082	3.94148	2.86845	1.41501	0.597455	0.322588	0.250532	0.0786589	-0.106737
	6.01	4.45136	3.4807	2.33973	1.34385	0.677218	0.392927	0.164243	-0.0913615	3.94339	2.87527	1.41631	0.602118	0.321456	0.246676	0.0773541	-0.11156
	6.01333	4.44846	3.48188	2.33841	1.3447	0.678105	0.389682	0.164472	-0.0928123	3.93784	2.8807	1.41356	0.600383	0.321942	0.248168	0.0783376	-0.108571
	6.01667	4.45277	3.48585	2.3388	1.34336	0.672962	0.387939	0.163884	-0.0925946	3.94347	2.87579	1.41429	0.597183	0.322986	0.245395	0.0777395	-0.109537
	6.02	4.4521	3.48342	2.34159	1.34515	0.679009	0.388852	0.160732	-0.0908899	3.94334	2.87778	1.41421	0.597247	0.322221	0.245738	0.0782435	-0.106552
	6.02333	4.45201	3.48666	2.34258	1.34447	0.676726	0.388341	0.162181	-0.0924913	3.94065	2.87758	1.41757	0.598347	0.321833	0.253251	0.0798603	-0.108822
	6.02667	4.45437	3.48622	2.33842	1.3449	0.678005	0.391788	0.165268	-0.0896148	3.94777	2.87703	1.41853	0.598134	0.323354	0.251476	0.0779537	-0.108794
	6.03	4.45216	3.48625	2.3413	1.3441	0.673451	0.391053	0.165169	-0.0908871	3.94771	2.87575	1.42049	0.600533	0.320864	0.252887	0.0774885	-0.108807
	6.03333	4.45079	3.48366	2.34331	1.34646	0.678409	0.390531	0.166097	-0.0971357	3.94429	2.8762	1.41499	0.597832	0.319053	0.249542	0.0773079	-0.108365
	6.03667	4.45165	3.48706	2.34177	1.34672	0.677268	0.391535	0.163562	-0.093088	3.94987	2.8807	1.41234	0.598891	0.320722	0.249364	0.0813808	-0.108401
	6.04	4.4538	3.48604	2.34287	1.34408	0.676897	0.38923	0.166815	-0.0939219	3.94661	2.88183	1.41514	0.599816	0.321174	0.247579	0.0768604	-0.105174
	6.04333	4.45432	3.49073	2.34526	1.34702	0.674712	0.391405	0.164421	-0.0925157	3.94665	2.88061	1.41757	0.599458	0.319746	0.248937	0.0727523	-0.10848
	6.04667	4.45696	3.48883	2.34252	1.34304	0.679783	0.389065	0.162988	-0.0937879	3.95002	2.87862	1.4183	0.601884	0.321541	0.248704	0.0761916	-0.112273
	6.05	4.4516	3.48751	2.34702	1.34587	0.675295	0.387343	0.165668	-0.0923742	3.9441	2.88145	1.41891	0.599383	0.326064	0.250404	0.0793627	-0.105352
	6.05333	4.45618	3.48832	2.34433	1.34487	0.675305	0.391033	0.166239	-0.0960352	3.94683	2.88354	1.41446	0.600199	0.317764	0.251821	0.0760256	-0.10581
	6.05667	4.4557	3.48768	2.34496	1.34879	0.680476	0.385074	0.164259	-0.0956259	3.94743	2.88367	1.41843	0.601199	0.32351	0.248948	0.0781122	-0.114206
	6.06	4.45367	3.49013	2.34413	1.34696	0.674151	0.390708	0.165668	-0.0949038	3.94517	2.88279	1.41472	0.601095	0.321087	0.251798	0.0755467	-0.107351
	6.06333	4.45387	3.48623	2.34541	1.34594	0.677022	0.388152	0.164564	-0.096032	3.94545	2.88748	1.421	0.598989	0.320745	0.247481	0.0768461	-0.108837
	6.06667	4.45702	3.49319	2.34207	1.34778	0.673195	0.390308	0.163757	-0.0959138	3.949	2.88716	1.42067	0.599634	0.318475	0.254687	0.0789144	-0.107007
	6.07	4.45645	3.49051	2.34267	1.34391	0.678956	0.392686	0.167816	-0.0918421	3.94799	2.88205	1.42318	0.596899	0.322256	0.249538	0.0764396	-0.110151
	6.07333	4.45841	3.49282	2.34926	1.34742	0.67649	0.386247	0.167762	-0.0941697	3.9475	2.88607	1.42094	0.600416	0.317522	0.252583	0.0743123	-0.10925
	6.07667	4.45866	3.48954	2.34797	1.35254	0.674259	0.385132	0.16309	-0.0970529	3.94764	2.88171	1.42226	0.600135	0.320193	0.251532	0.0795231	-0.107286
	6.08	4.4583	3.4897	2.35182	1.34777	0.678466	0.387209	0.165582	-0.094751	3.94962	2.88547	1.4229	0.602224	0.322531	0.245702	0.0759495	-0.108491
	6.08333	4.46283	3.49466	2.34976	1.34533	0.675095	0.388137	0.162197	-0.0943813	3.94714	2.88693	1.41999	0.601758	0.319359	0.246199	0.0803212	-0.112456
	6.08667	4.46172	3.4963	2.34818	1.35082	0.674392	0.389404	0.163948	-0.0919611	3.9468	2.88661	1.42296	0.601765	0.319711	0.248434	0.0815688	-0.10885
	6.09	4.46021	3.49228	2.34567	1.34869	0.674801	0.390602	0.162463	-0.0952252	3.94816	2.88918	1.41953	0.602997	0.320159	0.248853	0.0771663	-0.108649
	6.09333	4.45619	3.49312	2.34905	1.34888	0.681536	0.387619	0.162985	-0.0932714	3.94934	2.88606	1.42108	0.604905	0.324886	0.248012	0.0743817	-0.108578
	6.09667	4.46163	3.49129	2.35132	1.35074	0.679236	0.387286	0.166034	-0.0954263	3.95283	2.88536	1.42034	0.601301	0.320748	0.247648	0.0796183	-0.112744
	6.1	4.45406	3.49494	2.34729	1.34765	0.677885	0.387534	0.165919	-0.0907903	3.95457	2.8891	1.41916	0.599754	0.322723	0.249144	0.0755209	-0.11124
	6.10333	4.4609	3.49725	2.35281	1.35054	0.67589	0.387318	0.160128	-0.0937557	3.95121	2.88952	1.42694	0.599453	0.321326	0.248668	0.0814926	-0.109241
	6.10667	4.46053	3.49536	2.35352	1.35288	0.677812	0.391405	0.161231	-0.0987948	3.95142	2.8865	1.42291	0.603383	0.317252	0.253378	0.0783604	-0.108608
	6.11	4.46078	3.49575	2.35041	1.35228	0.680509	0.387325	0.162178	-0.0969805	3.95534	2.89002	1.42674	0.600929	0.317771	0.251157	0.0781859	-0.11336
	6.11333	4.46266	3.49745	2.3505	1.35171	0.678803	0.390134	0.162398	-0.0938802	3.95024	2.89385	1.42193	0.604678	0.323345	0.253891	0.0787836	-0.109234
	6.11667	4.46208	3.49396	2.34982	1.3499	0.675237	0.387547	0.162159	-0.0947745	3.95274	2.8946	1.42158	0.596826	0.320338	0.249634	0.0731784	-0.110458
	6.12	4.45919	3.49784	2.35289	1.35062	0.676982	0.387061	0.163811	-0.0974244	3.94924	2.88829	1.42598	0.601125	0.318059	0.245945	0.0755784	-0.111054
	6.12333	4.46401	3.50293	2.35091	1.34915	0.674181	0.38742	0.162516	-0.0972061	3.9526	2.89002	1.42537	0.605647	0.321291	0.251449	0.079709	-0.1125
	6.12667	4.46298	3.4947	2.35541	1.34788	0.677724	0.390974	0.16398	-0.0929013	3.9524	2.89333	1.42523	0.60358	0.318468	0.247701	0.0764098	-0.112308
	6.13	4.46164	3.49853	2.35212	1.35207	0.678387	0.391411	0.162488	-0.0965838	3.95379	2.89183	1.42682	0.601257	0.32305	0.248177	0.0788955	-0.110581
	6.13333	4.46227	3.49891	2.35165	1.34878	0.68025	0.390762	0.159883	-0.0905064	3.95539	2.89475	1.42498	0.604196	0.318923	0.251217	0.0803851	-0.112855
	6.13667	4.46606	3.50082	2.3522	1.3559	0.67711	0.391244	0.165655	-0.0961229	3.95343	2.89104	1.42522	0.603733	0.317562	0.247516	0.0769514	-0.109532
	6.14	4.46518	3.49856	2.35366	1.35226	0.678062	0.384469	0.16176	-0.0969672	3.94903	2.89417	1.42669	0.606943	0.322316	0.248107	0.0764829	-0.109048
	6.14333	4.46291	3.49827	2.35895	1.3537	0.67708	0.39011	0.163555	-0.094124	3.9551	2.89488	1.42485	0.600548	0.32134	0.252497	0.0831425	-0.110996
	6.14667	4.46689	3.50362	2.35168	1.3535	0.68131	0.389507	0.160964	-0.0935273	3.95692	2.88775	1.42925	0.604333	0.321099	0.251014	0.0800739	-0.11354
	6.15	4.46415	3.50485	2.35884	1.35745	0.67944	0.390031	0.162829	-0.0957015	3.95636	2.8945	1.43102	0.600885	0.317183	0.251408	0.0772539	-0.106294
	6.15333	4.46606	3.50146	2.35734	1.35512	0.681988	0.388361	0.164495	-0.0919113	3.95982	2.89429	1.42908	0.598791	0.321959	0.251054	0.0808833	-0.11018
	6.15667	4.46652	3.50484	2.35367	1.35702	0.678808	0.385264	0.162157	-0.0933818	3.96014	2.89715	1.42765	0.600854	0.322819	0.247284	0.0771298	-0.112559
	6.16	4.46402	3.50543	2.35867	1.3552	0.679651	0.388847	0.164905	-0.0974045	3.9595	2.89721	1.43155	0.601463	0.323388	0.248387	0.0740125	-0.114415
	6.16333	4.4628	3.50765	2.3545	1.36076	0.677283	0.389782	0.163028	-0.0931192	3.95758	2.89632	1.42969	0.59999	0.324114	0.248689	0.0758475	-0.109131
	6.16667	4.46718	3.50929	2.35577	1.36012	0.681659	0.390985	0.163222	-0.0966722	3.9615	2.8988	1.42916	0.601749	0.317526	0.250985	0.0760648	-0.110092
	6.17	4.46527	3.50155	2.35836	1.35699	0.679994	0.389236	0.16246	-0.09508	3.95825	2.89888	1.43332	0.60565	0.314649	0.248484	0.0782312	-0.111882
	6.17333	4.46493	3.50514	2.35802	1.35503	0.681603	0.389188	0.166409	-0.095718	3.95542	2.89987	1.43366	0.598629	0.317704	0.249852	0.0780872	-0.113162
	6.17667	4.46625	3.50342	2.36025	1.35252	0.683224	0.389983	0.159513	-0.0929259	3.95372	2.9006	1.43137	0.602733	0.321514	0.247708	0.0797198	-0.111838
	6.18	4.46736	3.50587	2.36106	1.35507	0.679158	0.386634	0.162064	-0.100585	3.9614	2.8997	1.43216	0.602329	0.320542	0.243914	0.075254	-0.11516
	6.18333	4.46499	3.50558	2.35705	1.35115	0.683374	0.392263	0.160744	-0.0963975	3.95568	2.90032	1.42912	0.605243	0.319117	0.249851	0.0733142	-0.108378
	6.18667	4.46515	3.50866	2.36115	1.35636	0.679843	0.387178	0.160501	-0.0994499	3.95916	2.90339	1.42741	0.60755	0.323547	0.247167	0.0797411	-0.110845
	6.19	4.46714	3.50504	2.36381	1.36115	0.680338	0.387212	0.159944	-0.0992194	3.95798	2.90071	1.43033	0.603968	0.319033	0.247775	0.0725308	-0.113816
	6.19333	4.46437	3.5062	2.36123	1.35724	0.681546	0.388836	0.164847	-0.0981206	3.95621	2.90466	1.43117	0.601561	0.324402	0.245267	0.0758632	-0.112324
	6.19667	4.46651	3.50544	2.35843	1.36098	0.679348	0.390276	0.163474	-0.0956611	3.96356	2.9014	1.4337	0.604325	0.322077	0.247677	0.0794515	-0.111891
	6.2	4.46646	3.50778	2.35832	1.36	0.680398	0.390914	0.160573	-0.0958065	3.96384	2.90735	1.43204	0.60264	0.319722	0.250333	0.0804453	-0.111354
	6.20333	4.46983	3.50606	2.36501	1.35652	0.683377	0.390209	0.165045	-0.0980872	3.95741	2.90172	1.43208	0.6035	0.319266	0.248022	0.0759089	-0.114175
	6.20667	4.47101	3.51306	2.36167	1.36272	0.680815	0.39324	0.163549	-0.101382	3.96132	2.90616	1.4342	0.60166	0.32103	0.248977	0.0799565	-0.110239
	6.21	4.47143	3.50745	2.36647	1.35956	0.683228	0.389541	0.161563	-0.0933231	3.96388	2.90215	1.43258	0.601062	0.319246	0.249596	0.0760479	-0.112467
	6.21333	4.4705	3.50709	2.3672	1.35858	0.680173	0.388881	0.162853	-0.0929514	3.95989	2.90526	1.43749	0.603935	0.325203	0.250334	0.0771346	-0.110847
	6.21667	4.46649	3.51007	2.36437	1.36242	0.678597	0.388734	0.163509	-0.094214	3.95849	2.90231	1.43212	0.606159	0.320276	0.248912	0.0769378	-0.108618
	6.22	4.47096	3.51203	2.36471	1.35667	0.680338	0.390599	0.164169	-0.0997188	3.96117	2.90421	1.43719	0.602906	0.319008	0.251911	0.0740571	-0.112926
	6.22333	4.47452	3.51088	2.36672	1.35963	0.681899	0.390165	0.161798	-0.0992472	3.95967	2.90915	1.43619	0.605666	0.318324	0.245577	0.0760701	-0.114413
	6.22667	4.47237	3.51127	2.36578	1.36124	0.681207	0.39199	0.164702	-0.0961025	3.96569	2.9089	1.43525	0.603939	0.321675	0.249837	0.0752417	-0.113825
	6.23	4.47428	3.51634	2.36512	1.3578	0.682329	0.389754	0.162992	-0.0966656	3.96481	2.90556	1.4339	0.604309	0.321317	0.247677	0.0760139	-0.114978
	6.23333	4.47494	3.51122	2.36508	1.3604	0.680695	0.388576	0.159728	-0.0996057	3.96124	2.90653	1.4324	0.607576	0.323835	0.249666	0.0818138	-0.112592
	6.23667	4.47418	3.51574	2.36317	1.36252	0.683293	0.390773	0.163186	-0.09726	3.96214	2.90427	1.4407	0.604172	0.323096	0.250671	0.0777607	-0.111949
	6.24	4.47284	3.51286	2.3686	1.35928	0.680798	0.391004	0.163407	-0.0963345	3.96573	2.90904	1.43401	0.604254	0.320045	0.246437	0.0781057	-0.112682
	6.24333	4.47076	3.51405	2.36817	1.36209	0.680719	0.390318	0.161047	-0.0969223	3.96234	2.90836	1.43911	0.603442	0.320805	0.246869	0.0766182	-0.111442
	6.24667	4.47352	3.51606	2.36719	1.36488	0.683497	0.392349	0.165125	-0.0928493	3.9594	2.90959	1.4413	0.607151	0.323376	0.246671	0.0759526	-0.111172
	6.25	4.47298	3.51456	2.36664	1.36204	0.679903	0.390833	0.160505	-0.0986297	3.96814	2.90899	1.43632	0.605013	0.317558	0.251223	0.0737154	-0.110058
	6.25333	4.4694	3.51403	2.36883	1.36166	0.6804	0.391883	0.16154	-0.0962765	3.96605	2.91115	1.43608	0.609579	0.319377	0.250294	0.0777319	-0.1132
	6.25667	4.47449	3.51248	2.36592	1.3641	0.681983	0.39114	0.165561	-0.10033	3.96678	2.90913	1.43989	0.604589	0.320116	0.246137	0.0767147	-0.111223
	6.26	4.47291	3.51648	2.37023	1.36379	0.680159	0.389195	0.161652	-0.101855	3.96912	2.9109	1.43666	0.60604	0.317265	0.251834	0.0759448	-0.114456
	6.26333	4.47002	3.51379	2.36384	1.36633	0.681136	0.390695	0.162028	-0.0938827	3.96196	2.91516	1.4416	0.606613	0.318818	0.242616	0.0758027	-0.111533
	6.26667	4.46979	3.51629	2.37364	1.36475	0.679062	0.386553	0.162466	-0.097852	3.96431	2.91197	1.44083	0.602571	0.319984	0.2492	0.0761508	-0.113218
	6.27	4.47297	3.51747	2.37327	1.36076	0.683527	0.389534	0.166221	-0.100785	3.96885	2.90661	1.44172	0.603968	0.32186	0.246294	0.079497	-0.113817
	6.27333	4.47165	3.52091	2.37393	1.36304	0.682522	0.390234	0.166087	-0.100702	3.96858	2.91379	1.43694	0.608954	0.318708	0.251694	0.0767115	-0.112083
	6.27667	4.47456	3.51863	2.37284	1.36336	0.683161	0.392035	0.163939	-0.0964435	3.96812	2.91407	1.44282	0.605137	0.320191	0.249896	0.0758898	-0.110414
	6.28	4.47718	3.51964	2.37298	1.36467	0.683373	0.390547	0.163918	-0.0957009	3.96549	2.91561	1.44176	0.607413	0.321785	0.248069	0.0747323	-0.112457
	6.28333	4.47732	3.52353	2.37262	1.36455	0.682779	0.392339	0.165097	-0.099103	3.97465	2.91233	1.44011	0.608132	0.325218	0.248574	0.0739797	-0.112045
	6.28667	4.47387	3.51975	2.37606	1.3699	0.682694	0.387478	0.163014	-0.0958105	3.96677	2.91194	1.44104	0.60493	0.322058	0.245984	0.0782144	-0.113848
	6.29	4.47966	3.52094	2.37421	1.36571	0.681617	0.391565	0.160295	-0.094553	3.96762	2.91962	1.44581	0.609207	0.324611	0.249262	0.0735308	-0.111459
	6.29333	4.47138	3.52055	2.37157	1.36693	0.682619	0.388915	0.162561	-0.0961676	3.97293	2.91462	1.44196	0.605242	0.316753	0.251134	0.0761839	-0.115872
	6.29667	4.47903	3.52264	2.37177	1.36702	0.680079	0.385953	0.167553	-0.100061	3.96553	2.92284	1.44449	0.605943	0.323876	0.247782	0.0793452	-0.111325
	6.3	4.47997	3.52154	2.37824	1.3682	0.683144	0.391087	0.165549	-0.0983317	3.9715	2.91942	1.4439	0.606701	0.318798	0.245301	0.0814531	-0.11079
	6.30333	4.47554	3.51988	2.37941	1.36494	0.685469	0.391006	0.16131	-0.096999	3.97074	2.91833	1.44541	0.610344	0.320417	0.249455	0.076485	-0.11248
	6.30667	4.47882	3.52466	2.3764	1.36757	0.686312	0.387272	0.164152	-0.0963971	3.97158	2.91836	1.44953	0.607004	0.322846	0.245047	0.0775164	-0.110679
	6.31	4.47881	3.52207	2.37831	1.36771	0.683774	0.392258	0.160792	-0.0956867	3.96508	2.91915	1.44573	0.604474	0.322021	0.25255	0.0759008	-0.112308
	6.31333	4.4832	3.52295	2.37693	1.36685	0.684089	0.386761	0.164869	-0.0997211	3.9723	2.91747	1.44245	0.608695	0.321086	0.252739	0.0788371	-0.115977
	6.31667	4.47778	3.5254	2.37622	1.36058	0.682012	0.391749	0.168237	-0.0962422	3.97241	2.92208	1.44204	0.603389	0.321164	0.250982	0.0778708	-0.112126
	6.32	4.47787	3.52128	2.37438	1.36766	0.681479	0.390476	0.160726	-0.0969758	3.97196	2.91728	1.44728	0.603702	0.320961	0.250603	0.0766359	-0.115004
	6.32333	4.47997	3.52341	2.37966	1.36753	0.684764	0.390204	0.16022	-0.0977082	3.97373	2.92375	1.4452	0.60832	0.320895	0.249215	0.0753944	-0.114305
	6.32667	4.47252	3.5231	2.38196	1.36685	0.681229	0.393259	0.165239	-0.0983224	3.96951	2.92326	1.44389	0.605226	0.317547	0.246157	0.0777832	-0.109791
	6.33	4.47869	3.52378	2.37884	1.36626	0.681655	0.394697	0.162632	-0.0971948	3.97356	2.92553	1.44982	0.603553	0.323025	0.252986	0.0779741	-0.110629
	6.33333	4.4811	3.52267	2.38151	1.37176	0.684309	0.388527	0.162492	-0.0977427	3.97505	2.91707	1.44706	0.608271	0.320577	0.245747	0.0782183	-0.114174
	6.33667	4.47832	3.52501	2.37923	1.36801	0.682158	0.390755	0.164907	-0.098425	3.9702	2.92462	1.44853	0.611923	0.320945	0.249102	0.0809449	-0.115398
	6.34	4.48221	3.5195	2.3792	1.36637	0.681217	0.392668	0.162157	-0.0979855	3.96873	2.92182	1.44832	0.605935	0.319471	0.246239	0.0758164	-0.109744
	6.34333	4.48569	3.52084	2.37746	1.36519	0.683278	0.386674	0.164312	-0.0971429	3.97791	2.92847	1.44705	0.605035	0.322755	0.249321	0.0750323	-0.11364
	6.34667	4.47707	3.52223	2.3753	1.36912	0.679559	0.390066	0.162292	-0.0986528	3.97264	2.92259	1.44651	0.605848	0.322429	0.246762	0.0717704	-0.111264
	6.35	4.48003	3.52761	2.37721	1.37041	0.68457	0.385951	0.160072	-0.0949668	3.97125	2.92369	1.44409	0.604361	0.318449	0.244696	0.0750422	-0.112752
	6.35333	4.48179	3.5311	2.37859	1.36678	0.688819	0.390941	0.163747	-0.0976052	3.97752	2.92117	1.44574	0.609124	0.32105	0.250232	0.074271	-0.114537
	6.35667	4.47972	3.52384	2.38432	1.37282	0.683751	0.388947	0.161515	-0.103815	3.97174	2.92242	1.44945	0.607435	0.319301	0.249058	0.0760525	-0.114998
	6.36	4.48342	3.52433	2.38142	1.36907	0.685222	0.387309	0.165589	-0.0946759	3.97108	2.92353	1.44991	0.606498	0.320655	0.246412	0.0762952	-0.112856
	6.36333	4.48394	3.52492	2.38487	1.37349	0.689412	0.384343	0.16586	-0.0965602	3.97149	2.92506	1.44756	0.60712	0.322622	0.247012	0.0784178	-0.11548
	6.36667	4.48238	3.52656	2.38112	1.37134	0.686174	0.390733	0.165835	-0.0989341	3.98059	2.92578	1.45031	0.60852	0.319301	0.247144	0.0797847	-0.113966
	6.37	4.4814	3.52625	2.38224	1.37013	0.685488	0.390703	0.16504	-0.0990272	3.97637	2.92624	1.45164	0.603312	0.323934	0.249102	0.0766678	-0.115433
	6.37333	4.48516	3.53503	2.38092	1.36633	0.683834	0.392685	0.161266	-0.0970405	3.97562	2.92794	1.44864	0.608346	0.323339	0.249581	0.0779706	-0.112213
	6.37667	4.48858	3.52675	2.38669	1.37098	0.684387	0.389391	0.161434	-0.100675	3.97626	2.92655	1.44953	0.610046	0.321211	0.248236	0.0768325	-0.115888
	6.38	4.48281	3.53031	2.38407	1.37021	0.688081	0.392618	0.160434	-0.100267	3.97737	2.92463	1.44772	0.608064	0.322455	0.249041	0.0801483	-0.116291
	6.38333	4.4831	3.52834	2.38286	1.36974	0.685883	0.392223	0.157412	-0.0983113	3.97632	2.92816	1.44871	0.608854	0.320167	0.249964	0.0795854	-0.112904
	6.38667	4.48529	3.52828	2.38436	1.36861	0.685677	0.392009	0.163756	-0.0930633	3.97791	2.92936	1.45544	0.604526	0.321355	0.246445	0.0760167	-0.116122
	6.39	4.48395	3.53229	2.38725	1.36837	0.68441	0.391456	0.16232	-0.102716	3.976	2.92588	1.45246	0.608984	0.319908	0.251091	0.0757735	-0.112831
	6.39333	4.48738	3.52684	2.38531	1.37048	0.688363	0.388176	0.161252	-0.0980501	3.98262	2.92849	1.45384	0.607841	0.320974	0.246136	0.0788507	-0.113637
	6.39667	4.48836	3.52998	2.3859	1.36926	0.687387	0.388597	0.160584	-0.0994354	3.97824	2.93156	1.45089	0.609996	0.320907	0.251935	0.0771315	-0.114421
	6.4	4.48056	3.5302	2.38894	1.37349	0.683486	0.38975	0.161206	-0.0989646	3.97772	2.92959	1.45169	0.606124	0.317562	0.2487	0.0753546	-0.112207
	6.40333	4.48909	3.53569	2.38516	1.37424	0.685812	0.39031	0.162402	-0.0962769	3.97765	2.92904	1.45045	0.605533	0.324601	0.249479	0.0744865	-0.113985
	6.40667	4.48616	3.53221	2.38899	1.3764	0.683173	0.395299	0.157267	-0.0987101	3.97886	2.93276	1.45118	0.60966	0.325179	0.246017	0.0751048	-0.112441
	6.41	4.48437	3.53139	2.38737	1.3711	0.68659	0.393485	0.166132	-0.098803	3.97594	2.93382	1.45177	0.607131	0.320174	0.249232	0.0755914	-0.114778
	6.41333	4.48933	3.52972	2.38732	1.37385	0.684184	0.394395	0.163622	-0.0978754	3.97681	2.93604	1.45824	0.607774	0.321933	0.248199	0.0762634	-0.113537
	6.41667	4.49341	3.53482	2.39014	1.37618	0.685882	0.388935	0.160004	-0.0978261	3.98371	2.93451	1.45528	0.607039	0.322785	0.245661	0.0749758	-0.116726
	6.42	4.48793	3.53345	2.38859	1.37469	0.6833	0.390332	0.1653	-0.102246	3.97913	2.93664	1.45193	0.609369	0.323176	0.248747	0.0724847	-0.118096
	6.42333	4.48758	3.53749	2.38998	1.37763	0.682843	0.390617	0.160291	-0.0981464	3.98159	2.93348	1.45378	0.608903	0.318022	0.245845	0.0796249	-0.112002
	6.42667	4.48626	3.53292	2.39111	1.37647	0.686217	0.393436	0.164517	-0.10063	3.97999	2.93444	1.45537	0.608478	0.32134	0.250854	0.0737378	-0.113676
	6.43	4.49085	3.53658	2.39214	1.37689	0.679187	0.391364	0.16535	-0.0925226	3.98132	2.93805	1.45472	0.611108	0.321904	0.252318	0.0734783	-0.118344
	6.43333	4.48522	3.53967	2.39277	1.37507	0.681498	0.390042	0.161142	-0.101999	3.98206	2.935	1.46106	0.612699	0.316115	0.249626	0.0776962	-0.114184
	6.43667	4.48902	3.53287	2.39173	1.37419	0.684654	0.393464	0.159556	-0.0991391	3.98229	2.93604	1.45656	0.607682	0.320706	0.247318	0.0787508	-0.1151
	6.44	4.48703	3.53238	2.38739	1.37808	0.690226	0.391175	0.159325	-0.0986957	3.97832	2.9362	1.45325	0.608808	0.322447	0.246825	0.0729781	-0.117899
	6.44333	4.48733	3.53995	2.38962	1.37619	0.689575	0.391229	0.164876	-0.100799	3.98175	2.93576	1.4582	0.608601	0.320505	0.248924	0.0789648	-0.112831
	6.44667	4.48332	3.53659	2.39363	1.37619	0.688692	0.392536	0.166021	-0.101892	3.98088	2.93883	1.45502	0.609901	0.316331	0.25103	0.0753324	-0.114193
	6.45	4.48711	3.53792	2.39442	1.37858	0.684736	0.393123	0.16642	-0.0962474	3.9835	2.93768	1.45784	0.612304	0.31861	0.252163	0.0778702	-0.1161
	6.45333	4.48759	3.5403	2.39186	1.37438	0.689019	0.393191	0.163639	-0.0939208	3.98409	2.94229	1.45876	0.60807	0.316878	0.248586	0.0814524	-0.116764
	6.45667	4.49323	3.54469	2.397	1.3761	0.686254	0.393981	0.160799	-0.101855	3.9849	2.94337	1.45418	0.606934	0.324569	0.247486	0.0767805	-0.118458
	6.46	4.48835	3.54136	2.3918	1.378	0.68745	0.391864	0.16202	-0.101255	3.98922	2.94429	1.46179	0.607179	0.319521	0.24743	0.0777945	-0.116725
	6.46333	4.49129	3.53979	2.39137	1.37373	0.685008	0.390823	0.161809	-0.0965271	3.97841	2.9386	1.45524	0.608873	0.318638	0.247952	0.0751879	-0.115384
	6.46667	4.48701	3.54018	2.3966	1.38007	0.689086	0.387941	0.16467	-0.0998202	3.98462	2.94099	1.45951	0.608826	0.323886	0.246116	0.0762989	-0.117059
	6.47	4.48989	3.53747	2.39804	1.37707	0.690779	0.394927	0.162779	-0.103516	3.98253	2.94226	1.45762	0.608944	0.323143	0.247651	0.0785551	-0.111554
	6.47333	4.49417	3.54443	2.39584	1.37882	0.687379	0.389213	0.163231	-0.101332	3.98329	2.94155	1.45942	0.60772	0.323662	0.242671	0.074462	-0.11821
	6.47667	4.48857	3.5424	2.39746	1.37978	0.684699	0.389478	0.16312	-0.102636	3.9868	2.94173	1.45752	0.607131	0.323511	0.251409	0.0760675	-0.11433
	6.48	4.49335	3.54077	2.40028	1.38286	0.685245	0.393839	0.162537	-0.0959763	3.98384	2.94183	1.46195	0.610385	0.324833	0.248325	0.0801959	-0.116763
	6.48333	4.48993	3.53995	2.4006	1.38299	0.689643	0.395329	0.16498	-0.100306	3.98759	2.9441	1.46468	0.612518	0.318176	0.244906	0.0753052	-0.113532
	6.48667	4.49086	3.54271	2.39423	1.38427	0.685405	0.390943	0.165325	-0.0993259	3.98678	2.94155	1.46187	0.609497	0.319103	0.246376	0.0750544	-0.117939
	6.49	4.49216	3.54255	2.39617	1.38133	0.691711	0.393183	0.160788	-0.101751	3.98561	2.94627	1.46166	0.60932	0.322433	0.247978	0.075099	-0.114994
	6.49333	4.49067	3.54574	2.39789	1.38206	0.68715	0.393493	0.163747	-0.100577	3.98896	2.94481	1.46074	0.609867	0.32093	0.245106	0.0741033	-0.117319
	6.49667	4.49008	3.54299	2.39796	1.38222	0.685437	0.392481	0.163493	-0.100675	3.98818	2.94894	1.46139	0.608104	0.320024	0.243746	0.077662	-0.114862
	6.5	4.49146	3.54451	2.4	1.37887	0.687153	0.394363	0.162418	-0.099255	3.98563	2.94327	1.46269	0.608119	0.321532	0.245961	0.0740737	-0.116449
	6.50333	4.49944	3.54178	2.39896	1.38142	0.688792	0.393123	0.162413	-0.0981705	3.98536	2.94409	1.45938	0.609565	0.316194	0.249046	0.0777181	-0.11731
	6.50667	4.4931	3.54371	2.39883	1.38286	0.689507	0.390739	0.161451	-0.0972089	3.98354	2.95111	1.46356	0.609499	0.322752	0.249223	0.075158	-0.114556
	6.51	4.49729	3.54358	2.40068	1.38253	0.689957	0.394671	0.160175	-0.101148	3.9905	2.95288	1.46298	0.606617	0.325187	0.247167	0.0804007	-0.117004
	6.51333	4.49354	3.54271	2.40045	1.38352	0.685173	0.391074	0.160785	-0.101135	3.98607	2.95035	1.46457	0.609481	0.317278	0.250389	0.0748594	-0.114684
	6.51667	4.49125	3.54536	2.39861	1.38404	0.689937	0.394764	0.159034	-0.103787	3.98282	2.94919	1.4656	0.610873	0.322576	0.25212	0.0791802	-0.115585
	6.52	4.49649	3.54596	2.40105	1.38145	0.68707	0.392415	0.162225	-0.0992476	3.99308	2.95018	1.46427	0.612152	0.322174	0.248429	0.0773498	-0.117514
	6.52333	4.49496	3.5451	2.39933	1.38315	0.690018	0.392146	0.163172	-0.0992809	3.98334	2.95071	1.46477	0.613593	0.322585	0.247775	0.075762	-0.114115
	6.52667	4.49644	3.54843	2.40034	1.38174	0.689266	0.393758	0.161579	-0.101904	3.99001	2.94943	1.4656	0.608708	0.316915	0.245021	0.0748936	-0.112376
	6.53	4.49083	3.54479	2.4002	1.38294	0.691754	0.39387	0.159847	-0.100704	3.99132	2.94586	1.46767	0.611072	0.314286	0.24685	0.0749638	-0.110957
	6.53333	4.49872	3.5472	2.40184	1.38513	0.688007	0.396609	0.163299	-0.104313	3.9888	2.9471	1.46566	0.611009	0.320295	0.243319	0.0714425	-0.117937
	6.53667	4.49869	3.54433	2.40097	1.38316	0.686115	0.393822	0.16308	-0.101108	3.99356	2.95039	1.46718	0.613291	0.32008	0.247378	0.0764869	-0.110167
	6.54	4.49564	3.55087	2.40406	1.38391	0.687863	0.388854	0.158709	-0.0969514	3.99552	2.94724	1.46921	0.609637	0.320931	0.247084	0.0794004	-0.112829
	6.54333	4.49483	3.55333	2.40259	1.38717	0.690079	0.391079	0.167393	-0.101618	3.99504	2.95107	1.46338	0.614958	0.323002	0.249795	0.0789084	-0.114542
	6.54667	4.50086	3.55099	2.40264	1.38279	0.688221	0.393862	0.164729	-0.0990683	3.98852	2.95134	1.46595	0.615145	0.322069	0.248162	0.0765046	-0.115362
	6.55	4.49788	3.5481	2.40366	1.38293	0.690355	0.39969	0.162638	-0.100878	3.99158	2.9501	1.46838	0.610389	0.321778	0.250288	0.0817443	-0.114884
	6.55333	4.49891	3.55267	2.40616	1.3867	0.692663	0.394793	0.162291	-0.100331	3.99098	2.95111	1.469	0.612706	0.319382	0.252071	0.0750735	-0.11342
	6.55667	4.49927	3.55291	2.40144	1.3853	0.685772	0.397409	0.160927	-0.104398	3.99198	2.95262	1.46913	0.611281	0.316837	0.248129	0.0740896	-0.113927
	6.56	4.49696	3.5537	2.40598	1.38571	0.692128	0.386836	0.169369	-0.101488	3.99374	2.95177	1.46574	0.612262	0.323544	0.249747	0.0780066	-0.11903
	6.56333	4.50029	3.55071	2.40546	1.38399	0.688715	0.391177	0.160854	-0.103418	3.99549	2.9491	1.46789	0.611787	0.32171	0.244552	0.074041	-0.117617
	6.56667	4.49752	3.55008	2.40663	1.38635	0.69129	0.393504	0.162614	-0.103651	3.99764	2.95379	1.46839	0.610647	0.322811	0.248746	0.0736768	-0.121818
	6.57	4.5019	3.55168	2.40969	1.38747	0.692052	0.391827	0.161531	-0.100528	3.9984	2.95615	1.46399	0.61126	0.318373	0.245418	0.076823	-0.120653
	6.57333	4.49695	3.55572	2.40834	1.38832	0.690096	0.390683	0.160828	-0.100568	3.98995	2.95525	1.46716	0.608743	0.323251	0.248523	0.0764932	-0.115563
	6.57667	4.49716	3.5508	2.40853	1.38853	0.692258	0.394686	0.158026	-0.102664	3.9929	2.95694	1.46858	0.614675	0.318575	0.248733	0.0783536	-0.118423
	6.58	4.50079	3.55284	2.41241	1.3899	0.692285	0.390949	0.162281	-0.098595	3.99785	2.95834	1.47168	0.613833	0.321987	0.247071	0.0751911	-0.120524
	6.58333	4.50145	3.55525	2.41129	1.38792	0.69338	0.393801	0.165824	-0.105033	3.98926	2.957	1.46851	0.616065	0.318865	0.247136	0.0804196	-0.115328
	6.58667	4.499	3.55101	2.4098	1.38757	0.691787	0.39557	0.165506	-0.101433	3.99303	2.95664	1.47053	0.615049	0.318954	0.247509	0.0766724	-0.116236
	6.59	4.49798	3.55415	2.40884	1.39105	0.69153	0.391375	0.163862	-0.105073	3.99071	2.95703	1.47061	0.611987	0.321235	0.247245	0.0818525	-0.112909
	6.59333	4.50165	3.55345	2.40962	1.38937	0.689619	0.393426	0.162162	-0.100305	3.99347	2.95939	1.47256	0.613368	0.324838	0.251162	0.0731465	-0.115852
	6.59667	4.50469	3.55543	2.40853	1.38618	0.693534	0.396746	0.163364	-0.0998886	3.99549	2.95623	1.46955	0.614788	0.318412	0.249719	0.0768543	-0.113897
	6.6	4.5021	3.55746	2.41295	1.39241	0.689614	0.392526	0.164882	-0.101723	3.99752	2.96122	1.4717	0.616129	0.316334	0.244926	0.0756297	-0.120887
	6.60333	4.50106	3.55772	2.40792	1.38823	0.688209	0.39239	0.164317	-0.102764	3.99518	2.95777	1.47094	0.610823	0.322484	0.246623	0.0765294	-0.116006
	6.60667	4.50319	3.55576	2.41082	1.38728	0.692125	0.393315	0.165436	-0.0965701	3.99658	2.96052	1.47	0.614456	0.318484	0.246143	0.0735171	-0.116849
	6.61	4.50637	3.55412	2.40627	1.39001	0.692469	0.388033	0.164158	-0.100068	3.99556	2.95935	1.47386	0.615735	0.323203	0.248312	0.0745298	-0.120363
	6.61333	4.50193	3.55325	2.41208	1.39071	0.697691	0.393558	0.160991	-0.0979812	3.99636	2.95506	1.47617	0.613529	0.321087	0.246434	0.078428	-0.1149
	6.61667	4.50333	3.56022	2.41154	1.38939	0.692249	0.395057	0.161741	-0.101807	3.99954	2.95971	1.46836	0.616655	0.323991	0.247933	0.0782611	-0.119807
	6.62	4.50793	3.56219	2.4138	1.3884	0.691127	0.395782	0.167889	-0.101798	3.99935	2.96315	1.47313	0.612063	0.322128	0.248152	0.0779793	-0.116872
	6.62333	4.5022	3.55728	2.41173	1.38917	0.68873	0.394043	0.163925	-0.100981	3.99755	2.96318	1.47367	0.614675	0.322024	0.245256	0.0739902	-0.115713
	6.62667	4.50069	3.55612	2.41293	1.39143	0.690804	0.393125	0.162821	-0.0992976	4.00035	2.96146	1.47283	0.612278	0.320439	0.251117	0.0748423	-0.118501
	6.63	4.50498	3.56022	2.41457	1.38919	0.689091	0.392754	0.167609	-0.102929	3.99486	2.96144	1.47402	0.611247	0.317621	0.246242	0.0786935	-0.119551
	6.63333	4.50581	3.55946	2.41449	1.39012	0.684244	0.389526	0.166178	-0.101511	3.99704	2.96044	1.47383	0.611695	0.329138	0.24709	0.074949	-0.119087
	6.63667	4.50326	3.55924	2.41251	1.38849	0.693406	0.393983	0.161578	-0.103707	3.99736	2.96432	1.47333	0.613381	0.321269	0.250745	0.0762589	-0.116892
	6.64	4.51014	3.55822	2.41426	1.39351	0.688757	0.388344	0.158462	-0.101541	3.99701	2.96789	1.4802	0.617794	0.321309	0.248706	0.0780092	-0.121408
	6.64333	4.5081	3.55689	2.41875	1.39151	0.692212	0.394242	0.165258	-0.099702	4.00424	2.96152	1.476	0.613596	0.322962	0.246573	0.0731914	-0.114546
	6.64667	4.50448	3.56285	2.41405	1.39244	0.694073	0.392924	0.165397	-0.10352	4.00087	2.96395	1.47506	0.609233	0.323635	0.249089	0.0765995	-0.117597
	6.65	4.50895	3.5632	2.41897	1.39372	0.686887	0.391728	0.162287	-0.104149	3.99814	2.95861	1.47342	0.609745	0.31918	0.247565	0.0738662	-0.114485
	6.65333	4.50472	3.56373	2.41706	1.3905	0.696332	0.392996	0.160847	-0.0984805	4.0011	2.96517	1.47417	0.614204	0.322345	0.248675	0.0765895	-0.11728
[truncated: 15,403 more rows]

## Sheet: Repeat 2
		Response [nm]
	Time [min]	40uM A0 ACD WT	20 uM A0 ACD WT	10uM A0 ACD WT	5uM A0 ACD WT	2.5uM A0 ACD WT	1.25uM A0 ACD WT	0.625uM A0 ACD WT	0uM A0 ACD WT	40uM A0 Q66H G109D ACD	20 uM A0 Q66H G109D ACD	10uM A0 Q66H G109D ACD	5uM A0 Q66H G109D ACD	2.5uM A0 Q66H G109D ACD	1.25uM A0 Q66H G109D ACD	0.625uM A0 Q66H G109D ACD	0uM A0 Q66H G109D ACD
	0	0.338339	0.266942	0.0910696	0.0329651	0.0177867	0.0117164	0.0153063	0.0129024	0.16949	0.117359	0.0304322	0.0180812	0.00284167	0.0127924	0.0144869	0.00315432
	0.003333	0.615375	0.404824	0.177375	0.0854966	0.0318948	0.0161372	0.0107627	0.0141742	0.274319	0.183045	0.073771	0.0414734	0.0139007	0.0147866	0.0074184	0.00258867
	0.006667	0.814211	0.507926	0.255349	0.117709	0.0440721	0.0205287	0.00759052	0.0117356	0.363218	0.229725	0.112935	0.0588465	0.0224413	0.018653	0.00212682	0.00059942
	0.01	0.958156	0.593579	0.318202	0.155764	0.0620035	0.02468	0.00384794	0.00983085	0.428478	0.270602	0.144823	0.0776832	0.0291862	0.0237566	0.00756991	0.00579063
	0.013333	1.07002	0.660718	0.370516	0.185226	0.0780303	0.0303479	0.0102893	0.00514342	0.479882	0.306005	0.172691	0.0916576	0.0364542	0.0264152	0.00667811	0.00112693
	0.016667	1.15687	0.717326	0.412455	0.208163	0.0924179	0.0344865	0.00781117	0.00871505	0.525578	0.335704	0.191828	0.110125	0.044064	0.0354903	0.00237215	1.578e-05
	0.02	1.22442	0.766487	0.450832	0.233626	0.103598	0.0356176	0.0070747	0.0116897	0.559776	0.361248	0.209826	0.118284	0.0520818	0.036229	0.00452864	-0.00119408
	0.023333	1.27366	0.806854	0.481854	0.257675	0.114572	0.0365798	0.00906597	0.0100264	0.595382	0.381414	0.227626	0.128177	0.0619785	0.0328661	0.00207639	-0.00263568
	0.026667	1.32806	0.839628	0.510382	0.267058	0.122004	0.0396099	0.0107452	0.00785877	0.628341	0.400154	0.239994	0.140807	0.0650754	0.0371617	0.00528395	-0.00265618
	0.03	1.36547	0.864806	0.533791	0.2838	0.133434	0.0459295	0.0105859	0.00637569	0.651194	0.421191	0.253352	0.145525	0.0711126	0.0421014	0.005736	-0.00097259
	0.033333	1.40206	0.891405	0.5541	0.306016	0.141914	0.0499243	0.0129008	0.0102964	0.67572	0.4407	0.263005	0.157541	0.0750155	0.0460306	0.00785959	-0.00528773
	0.036667	1.43058	0.914948	0.577405	0.32134	0.149245	0.0506984	0.0179632	0.0054455	0.698471	0.44782	0.273293	0.163742	0.0841934	0.0435658	0.0105133	-0.00089892
	0.04	1.45606	0.939756	0.591169	0.330399	0.156602	0.0552193	0.0141696	0.00873401	0.716076	0.464555	0.28138	0.169345	0.0828125	0.0528413	0.00586009	0.0020986
	0.043333	1.47871	0.958312	0.606985	0.341251	0.169266	0.0569976	0.0133417	0.00703718	0.734739	0.477261	0.289686	0.17597	0.0848896	0.058327	0.0106013	0.00105564
	0.046667	1.49872	0.973293	0.619206	0.356231	0.17053	0.0558472	0.015147	0.00349845	0.755747	0.487483	0.302026	0.178262	0.0918924	0.0535579	0.0128738	2.066e-05
	0.05	1.51917	0.995547	0.636311	0.366143	0.178689	0.0620725	0.01627	0.00402119	0.771144	0.497649	0.304671	0.181436	0.0931582	0.0565062	0.0109284	0.0010889
	0.053333	1.54142	1.0094	0.649413	0.375467	0.186288	0.0656959	0.0164512	0.00506796	0.783487	0.510937	0.312234	0.189982	0.101577	0.0637441	0.0121418	0.00102786
	0.056667	1.55972	1.01738	0.658537	0.383582	0.189634	0.0648148	0.0200467	0.00783255	0.803034	0.516914	0.314929	0.191951	0.103446	0.0637902	0.0134478	-0.00303372
	0.06	1.57744	1.03508	0.672994	0.39099	0.197413	0.0638055	0.0144961	0.00669803	0.817824	0.526592	0.326023	0.199328	0.104308	0.0632306	0.0145298	0.00329594
	0.063333	1.59185	1.0457	0.682118	0.395271	0.205015	0.0694162	0.0185447	0.00505533	0.83398	0.537474	0.328793	0.202115	0.107363	0.0702921	0.0097791	-0.00691326
	0.066667	1.60723	1.06001	0.689664	0.404535	0.211506	0.069382	0.0215652	0.00166263	0.844527	0.546163	0.334765	0.206325	0.114822	0.0672277	0.013467	0.00305454
	0.07	1.62367	1.07426	0.698461	0.411906	0.212813	0.0727047	0.0195584	0.00685384	0.859153	0.557337	0.338593	0.211663	0.117684	0.071205	0.0141911	-0.00454708
	0.073333	1.63979	1.08003	0.705538	0.416243	0.215058	0.0760004	0.0210762	0.0054641	0.867164	0.566961	0.348189	0.206912	0.114196	0.0713301	0.0123903	-0.00153645
	0.076667	1.64696	1.08963	0.716171	0.424473	0.217892	0.0717217	0.0225708	0.00102939	0.885333	0.572172	0.349626	0.212498	0.121873	0.0796939	0.0138874	-0.00219544
	0.08	1.6627	1.09975	0.722035	0.429523	0.22835	0.0766075	0.0201022	0.00523915	0.896435	0.579964	0.354934	0.22068	0.122528	0.0772937	0.0171438	-0.0041519
	0.083333	1.67238	1.10976	0.732463	0.433352	0.228259	0.0785339	0.0173799	0.00144662	0.907382	0.589237	0.356802	0.219591	0.124504	0.0788019	0.0146276	-0.0031472
	0.086667	1.6873	1.11987	0.739148	0.442106	0.233308	0.0804643	0.0203564	0.0065253	0.920436	0.599406	0.363168	0.221559	0.122908	0.0847548	0.0143806	-0.00070544
	0.09	1.70008	1.12939	0.744612	0.44974	0.240666	0.0808283	0.016065	0.00614132	0.934926	0.600531	0.36856	0.221381	0.12808	0.0832232	0.0185094	-0.00671216
	0.093333	1.71103	1.13304	0.749285	0.450702	0.244079	0.0837148	0.0229947	0.00635805	0.944452	0.606108	0.372011	0.227092	0.128668	0.0857263	0.0139467	-0.00538131
	0.096667	1.72384	1.14362	0.758898	0.458001	0.247234	0.0825649	0.0208957	0.00453224	0.951312	0.616247	0.37577	0.227478	0.131156	0.0899292	0.0161656	-0.00259658
	0.1	1.73118	1.1502	0.762585	0.462836	0.246574	0.0834932	0.0276563	0.00673391	0.961259	0.623345	0.380087	0.231745	0.130568	0.0840848	0.0162953	-0.00299462
	0.103333	1.74521	1.15979	0.768965	0.466661	0.252691	0.085529	0.0248585	0.00420775	0.977374	0.629835	0.385515	0.231938	0.130637	0.09142	0.0158705	-0.00350185
	0.106667	1.75419	1.16716	0.7729	0.468624	0.255463	0.0893358	0.0251771	0.00457027	0.986228	0.634446	0.383524	0.234023	0.136602	0.09332	0.0182557	-0.00281735
	0.11	1.76528	1.17209	0.779788	0.475316	0.259539	0.0962136	0.0258618	0.00392499	0.998758	0.644592	0.389107	0.239996	0.141794	0.096545	0.0163727	-0.00558825
	0.113333	1.77924	1.18315	0.786813	0.477126	0.262964	0.08743	0.0233618	0.0048038	1.00427	0.645548	0.395201	0.240313	0.138233	0.097417	0.0135646	-0.00224312
	0.116667	1.78274	1.18395	0.789643	0.482149	0.265905	0.0916701	0.0286702	0.00543096	1.0167	0.652169	0.398073	0.242601	0.138355	0.095101	0.0170961	-0.00877317
	0.12	1.79477	1.18783	0.796814	0.489105	0.270081	0.0916782	0.0288675	0.00535478	1.02626	0.66413	0.396608	0.246418	0.143893	0.099954	0.014855	-0.00502165
	0.123333	1.80472	1.20133	0.800771	0.486232	0.270406	0.0938099	0.0250987	0.00584914	1.03634	0.662637	0.403121	0.245835	0.145012	0.100343	0.0180545	-0.00447067
	0.126667	1.80595	1.20912	0.805594	0.491822	0.273297	0.0992498	0.0278123	0.00229301	1.04663	0.668907	0.408793	0.248102	0.146217	0.0971368	0.012784	-0.00304385
	0.13	1.8237	1.20952	0.806916	0.493299	0.275541	0.0923893	0.0231469	0.00360992	1.05542	0.674025	0.405724	0.252224	0.145775	0.101015	0.0169878	-0.00384446
	0.133333	1.83092	1.2212	0.810461	0.497493	0.281257	0.0969026	0.0251894	0.00559105	1.06623	0.681293	0.410143	0.251954	0.14655	0.10494	0.0199205	-0.00362452
	0.136667	1.84189	1.22364	0.813199	0.501317	0.283138	0.0983353	0.0304385	0.00642588	1.07305	0.689307	0.409358	0.254972	0.15104	0.0998872	0.0141809	-0.00195976
	0.14	1.84468	1.22631	0.825164	0.504953	0.280983	0.0998268	0.029517	0.00273933	1.08187	0.693223	0.418843	0.258818	0.145867	0.104227	0.0177312	-0.00271936
	0.143333	1.8593	1.23267	0.824205	0.511269	0.285703	0.0965277	0.0280528	0.00471284	1.08783	0.69887	0.42015	0.252985	0.15231	0.106432	0.0149559	-0.00461896
	0.146667	1.86518	1.23525	0.828694	0.507623	0.286443	0.097036	0.0263052	8.144e-05	1.09858	0.701249	0.421689	0.256548	0.150703	0.106967	0.0176984	-0.00311967
	0.15	1.87112	1.24531	0.834144	0.509401	0.29011	0.104797	0.033292	0.00298574	1.1095	0.708654	0.424123	0.258531	0.15314	0.111789	0.0176078	-0.00539275
	0.153333	1.88015	1.25265	0.839039	0.514005	0.294029	0.104378	0.0288685	0.00621202	1.11301	0.71207	0.426832	0.261751	0.148607	0.108315	0.0178149	-0.00207504
	0.156667	1.89139	1.25472	0.840744	0.517842	0.292828	0.102285	0.029698	0.00168326	1.1262	0.714919	0.430176	0.261067	0.153396	0.111508	0.015859	-0.0023361
	0.16	1.89393	1.25857	0.842834	0.519971	0.296326	0.101951	0.0324205	2.672e-05	1.13013	0.722979	0.431585	0.263884	0.15458	0.110943	0.0222911	-0.00598558
	0.163333	1.90411	1.26722	0.845995	0.523956	0.302513	0.103801	0.0315014	0.00478854	1.14046	0.729736	0.435982	0.265362	0.156393	0.114219	0.0164462	-0.00103064
	0.166667	1.91529	1.27123	0.851412	0.526704	0.298378	0.10734	0.0328167	0.00202634	1.15093	0.729439	0.43695	0.265966	0.152804	0.115186	0.0150624	-0.00503095
	0.17	1.92308	1.2744	0.853562	0.526129	0.301614	0.103251	0.0300536	0.00289871	1.15825	0.73293	0.440754	0.267647	0.158673	0.116442	0.0181321	-0.00485011
	0.173333	1.93192	1.2797	0.855513	0.533882	0.303225	0.110787	0.0350383	0.00615468	1.16548	0.73763	0.442872	0.270977	0.155623	0.11574	0.0176839	-0.0100912
	0.176667	1.93453	1.28203	0.862366	0.53557	0.304205	0.105423	0.0316081	0.00057926	1.17451	0.747217	0.445351	0.269044	0.158153	0.11619	0.016983	-0.00626977
	0.18	1.945	1.287	0.859031	0.53364	0.306363	0.109985	0.0380121	0.00226428	1.18301	0.747108	0.446404	0.273542	0.160828	0.115483	0.0203177	-0.00709244
	0.183333	1.94583	1.29218	0.863727	0.539107	0.308409	0.107895	0.0405571	-0.00072453	1.19449	0.754522	0.446586	0.266503	0.158331	0.118097	0.0151814	-0.00404938
	0.186667	1.95904	1.30111	0.871431	0.538341	0.30897	0.110148	0.0371138	0.00367167	1.2021	0.764838	0.449017	0.273732	0.161725	0.116356	0.0187626	-0.00419553
	0.19	1.96039	1.30124	0.870249	0.539986	0.310663	0.110424	0.0353479	-0.0005903	1.20774	0.763008	0.449922	0.274179	0.162391	0.122038	0.0162312	-0.00565859
	0.193333	1.97311	1.30621	0.875823	0.541937	0.311892	0.110517	0.0356651	-0.00202678	1.21441	0.769265	0.458448	0.274721	0.159775	0.118493	0.0133011	-0.00993284
	0.196667	1.97881	1.31719	0.879366	0.543408	0.311427	0.108421	0.0375714	0.00282838	1.22467	0.770616	0.459607	0.278859	0.160776	0.121209	0.0241249	-0.00645896
	0.2	1.98856	1.31424	0.88352	0.546323	0.313395	0.109891	0.0374327	0.00168314	1.22838	0.775167	0.458749	0.281887	0.161729	0.122285	0.0209213	-0.00685974
	0.203333	1.99346	1.31997	0.882218	0.551886	0.31831	0.109102	0.034749	0.00440826	1.23985	0.781516	0.461378	0.272491	0.164348	0.121254	0.0198621	-0.00161131
	0.206667	2.00687	1.32579	0.887438	0.549152	0.318733	0.110897	0.036868	0.00322773	1.24938	0.782619	0.459882	0.277526	0.160838	0.124195	0.0136274	-0.00475784
	0.21	2.00961	1.32751	0.889375	0.550672	0.323839	0.113002	0.0391414	0.00130798	1.25381	0.791405	0.466737	0.276799	0.163104	0.122888	0.0188773	-0.0041792
	0.213333	2.01233	1.33357	0.893683	0.553552	0.321881	0.113062	0.0335705	0.00369861	1.26086	0.795874	0.468117	0.283057	0.168884	0.123555	0.0202433	-0.00676664
	0.216667	2.02529	1.3388	0.893159	0.558194	0.322083	0.114935	0.0388446	0.00053038	1.27424	0.800352	0.473337	0.275892	0.167689	0.119606	0.0185642	-0.00353225
	0.22	2.03626	1.34182	0.894722	0.560305	0.321081	0.116984	0.0364331	-0.00162468	1.27732	0.803747	0.473204	0.279734	0.163025	0.121398	0.0165628	-0.00528594
	0.223333	2.03252	1.34443	0.904686	0.560607	0.326957	0.113726	0.0378872	-0.00054953	1.28202	0.811998	0.46892	0.284373	0.165668	0.12108	0.0200688	-0.00607427
	0.226667	2.04003	1.34977	0.904031	0.560054	0.328278	0.117727	0.0392548	0.00382413	1.2947	0.80831	0.470162	0.287579	0.167283	0.127364	0.0196512	-0.00924643
	0.23	2.05304	1.35336	0.90605	0.565084	0.326396	0.113407	0.038912	0.0002953	1.30023	0.816363	0.473897	0.285656	0.172265	0.126766	0.018672	-0.00741406
	0.233333	2.05832	1.35977	0.908136	0.56492	0.333152	0.120365	0.0400715	-0.00180922	1.30728	0.820464	0.481985	0.285808	0.171368	0.126463	0.0188533	-0.00170084
	0.236667	2.05888	1.3648	0.906703	0.566595	0.332302	0.118966	0.0407281	-0.00242243	1.3153	0.824167	0.479413	0.286815	0.171848	0.12458	0.0201353	-0.00464638
	0.24	2.06606	1.36712	0.910612	0.568475	0.32907	0.116468	0.0401215	-0.0009769	1.32429	0.827255	0.477714	0.28234	0.168848	0.127274	0.0237553	-0.00055965
	0.243333	2.07413	1.3719	0.917886	0.574502	0.331135	0.121348	0.043051	0.00265624	1.32624	0.829543	0.481725	0.28698	0.169368	0.134017	0.0175577	-0.00616928
	0.246667	2.08219	1.37534	0.91875	0.573264	0.334905	0.120023	0.0386486	0.00217499	1.33615	0.835694	0.486453	0.290756	0.172328	0.130392	0.0169046	-0.00577923
	0.25	2.09083	1.38324	0.919057	0.576548	0.333368	0.120313	0.0401137	-0.00192926	1.34433	0.839753	0.48348	0.291797	0.169724	0.127964	0.0191089	-0.00750907
	0.253333	2.09107	1.38219	0.918927	0.577508	0.343108	0.121849	0.042808	0.00207092	1.35262	0.841846	0.485136	0.28807	0.175642	0.128046	0.0192016	-0.00643357
	0.256667	2.10171	1.38562	0.923778	0.578872	0.335255	0.120892	0.0449167	0.00019409	1.35237	0.844814	0.489841	0.291108	0.177213	0.132057	0.0164754	-0.00935598
	0.26	2.1055	1.39039	0.931274	0.57843	0.338027	0.116551	0.0417523	0.00097277	1.36272	0.853002	0.493271	0.290711	0.171951	0.126406	0.0211859	-0.00582596
	0.263333	2.11415	1.39019	0.931532	0.577798	0.34339	0.119637	0.0424228	-0.00551377	1.37428	0.855987	0.491928	0.293608	0.170408	0.131703	0.0160197	-0.00725361
	0.266667	2.12452	1.3993	0.931921	0.581138	0.338803	0.122358	0.0406648	0.0024841	1.37699	0.854716	0.49686	0.291718	0.176948	0.133903	0.0142769	-0.00845548
	0.27	2.12461	1.39817	0.928764	0.587178	0.339729	0.120368	0.0434617	-0.00125382	1.38772	0.860798	0.497788	0.292795	0.174395	0.131198	0.019589	-0.0044709
	0.273333	2.13536	1.40424	0.934305	0.580592	0.342345	0.124205	0.0417616	-0.00083707	1.39066	0.86528	0.498498	0.295842	0.17362	0.132263	0.0154739	-0.0100569
	0.276667	2.13785	1.40782	0.938106	0.583385	0.342235	0.124677	0.0437192	0.00487532	1.39555	0.870128	0.501304	0.294615	0.176963	0.130709	0.0164177	-0.0072213
	0.28	2.14526	1.41364	0.938214	0.587675	0.342696	0.120099	0.0468443	-0.00107608	1.40942	0.872841	0.502263	0.300696	0.174052	0.134693	0.0199033	-0.00794252
	0.283333	2.1531	1.41342	0.945367	0.585522	0.350276	0.122674	0.0446973	-0.00109754	1.41642	0.877375	0.504186	0.298237	0.173058	0.128683	0.0171374	-0.00831087
	0.286667	2.15453	1.4178	0.944268	0.589395	0.345718	0.123511	0.0420099	0.00209465	1.419	0.880382	0.50323	0.299035	0.177509	0.13163	0.0178221	-0.00546881
	0.29	2.16694	1.418	0.948007	0.58862	0.346027	0.121375	0.0420868	0.00033607	1.42915	0.882032	0.505575	0.300843	0.181592	0.137155	0.0189569	-0.00593432
	0.293333	2.17501	1.42288	0.9494	0.59061	0.347293	0.123365	0.046038	0.00026359	1.43474	0.884054	0.509725	0.299974	0.172126	0.130219	0.0221143	-0.00558277
	0.296667	2.17529	1.42593	0.95074	0.594097	0.350653	0.122404	0.0447799	0.00153651	1.43918	0.887968	0.506752	0.299083	0.174431	0.136668	0.0200189	-0.0071214
	0.3	2.18273	1.4352	0.953207	0.591969	0.349431	0.119477	0.044738	0.00026276	1.45086	0.89213	0.50981	0.300837	0.179038	0.134831	0.0189952	-0.00482639
	0.303333	2.18858	1.43515	0.957261	0.593475	0.348606	0.123055	0.04891	0.00012412	1.454	0.896428	0.51165	0.303115	0.178462	0.137985	0.0217969	-0.00494178
	0.306667	2.19244	1.43806	0.959549	0.597686	0.351546	0.128004	0.0435747	0.00171353	1.45713	0.90253	0.514061	0.298114	0.179565	0.135783	0.021069	-0.0113512
	0.31	2.20148	1.44232	0.958375	0.599291	0.351799	0.119807	0.0461575	0.00030031	1.46673	0.906545	0.513835	0.301064	0.178449	0.136519	0.0227395	-0.0109318
	0.313333	2.2045	1.44541	0.960311	0.600415	0.354539	0.123952	0.0465611	0.00085392	1.47715	0.909618	0.516169	0.306174	0.172526	0.140253	0.0163894	-0.00529333
	0.316667	2.2126	1.45051	0.964477	0.599683	0.352625	0.124046	0.0494083	0.00054421	1.47811	0.912177	0.517091	0.301615	0.179569	0.139217	0.0178027	-0.00537451
	0.32	2.21478	1.44992	0.97078	0.598044	0.355497	0.125009	0.0469165	-8.44e-06	1.48577	0.915166	0.519595	0.306313	0.18275	0.136836	0.0200771	-0.0121064
	0.323333	2.22336	1.45648	0.968657	0.598199	0.356132	0.125811	0.048326	-3.3e-05	1.49187	0.920033	0.519731	0.302933	0.177811	0.137341	0.0186391	-0.00892707
	0.326667	2.21963	1.46111	0.967188	0.60405	0.356985	0.124053	0.0482811	0.00154581	1.50034	0.92507	0.522908	0.306477	0.17568	0.138485	0.0180253	-0.0084209
	0.33	2.22758	1.46435	0.969925	0.603531	0.359081	0.126582	0.0475454	0.00098791	1.50878	0.924336	0.525575	0.305699	0.183635	0.137197	0.0183839	-0.0093226
	0.333333	2.23723	1.46914	0.976094	0.610294	0.356633	0.127308	0.0484627	-1.786e-05	1.50967	0.93114	0.528955	0.304438	0.184562	0.137451	0.0167816	-0.00379845
	0.336667	2.2428	1.4647	0.973349	0.608323	0.360623	0.128046	0.0497962	-1.738e-05	1.51987	0.935092	0.522407	0.30501	0.179473	0.135355	0.0172923	-0.0111708
	0.34	2.24854	1.47467	0.976412	0.608998	0.365003	0.131233	0.0504236	0.00051047	1.52388	0.936108	0.525135	0.307224	0.182935	0.141664	0.0142807	-0.00765045
	0.343333	2.2566	1.47836	0.981051	0.609798	0.362039	0.130108	0.0495039	-0.00075922	1.5331	0.946494	0.531123	0.308776	0.180476	0.138734	0.0236362	-0.00897821
	0.346667	2.26268	1.47697	0.98099	0.610599	0.359284	0.123889	0.0451937	0.00061776	1.54058	0.943012	0.527833	0.309981	0.178179	0.138081	0.0195295	-0.00623926
	0.35	2.26569	1.48609	0.984627	0.609784	0.359491	0.127448	0.0530152	0.00016334	1.54091	0.946148	0.53687	0.310859	0.184366	0.138938	0.0207766	-0.00915058
	0.353333	2.27458	1.48383	0.983994	0.610636	0.360702	0.128777	0.0489979	0.00108125	1.55143	0.950932	0.533209	0.312486	0.18372	0.1378	0.0190963	-0.00857099
	0.356667	2.27657	1.48907	0.988708	0.612412	0.362086	0.128702	0.0514716	-0.00449536	1.55245	0.955759	0.540729	0.308282	0.182906	0.147393	0.0203552	-0.00553735
	0.36	2.28372	1.4945	0.988352	0.615577	0.364532	0.130267	0.0501051	-0.00205658	1.56457	0.956518	0.533538	0.315269	0.186555	0.140242	0.0214403	-0.00996502
	0.363333	2.29011	1.49078	0.992628	0.620551	0.365485	0.129816	0.0522952	0.00140931	1.57411	0.958441	0.537033	0.313321	0.187646	0.139086	0.0192146	-0.00594838
	0.366667	2.29613	1.49627	0.994607	0.615972	0.367824	0.132232	0.0498986	0.00088706	1.5825	0.963927	0.538348	0.310911	0.182984	0.142544	0.0205959	-0.00709291
	0.37	2.29999	1.49863	0.992584	0.617745	0.36147	0.130515	0.049448	-0.00132761	1.57647	0.966113	0.541186	0.314187	0.182262	0.141103	0.0186585	-0.00609561
	0.373333	2.30828	1.50153	0.992984	0.618643	0.36905	0.128655	0.0495769	0.00394132	1.58802	0.971074	0.539815	0.313741	0.185769	0.141985	0.0224149	-0.00814553
	0.376667	2.31329	1.50329	1.00147	0.620368	0.370672	0.13074	0.052409	-0.00151632	1.59381	0.973659	0.542603	0.317992	0.183384	0.147504	0.0181373	-0.00832673
	0.38	2.31645	1.51046	1.00081	0.620376	0.364729	0.132116	0.0513121	-0.00640855	1.60015	0.980038	0.547094	0.31621	0.185532	0.142921	0.0194767	-0.011627
	0.383333	2.31546	1.51053	0.998398	0.619996	0.367159	0.131568	0.049182	-0.00023148	1.60381	0.980875	0.543719	0.317665	0.189263	0.146234	0.0203513	-0.00760063
	0.386667	2.33146	1.51044	1.00352	0.62325	0.372868	0.132136	0.0546714	0.00020458	1.60927	0.985588	0.550783	0.319863	0.188613	0.148756	0.0213668	-0.00890656
	0.39	2.33483	1.52165	1.00322	0.625032	0.369125	0.130823	0.0522911	-0.0026469	1.61609	0.99017	0.551934	0.317256	0.184608	0.143902	0.0202458	-0.0102932
	0.393333	2.33664	1.52138	1.00884	0.620641	0.369512	0.132305	0.0517625	-0.00161801	1.62351	0.989674	0.551305	0.318863	0.185668	0.147611	0.019501	-0.0073237
	0.396667	2.34451	1.52437	1.00584	0.628461	0.370064	0.134249	0.0532886	0.00010147	1.63114	0.997977	0.551177	0.320725	0.184863	0.147384	0.0184978	-0.00649973
	0.4	2.35002	1.53032	1.01069	0.629404	0.372332	0.133543	0.0553223	-0.00535605	1.63193	1.00121	0.54882	0.316577	0.18517	0.146368	0.0202156	-0.0111138
	0.403333	2.35587	1.52876	1.01135	0.627343	0.370407	0.130879	0.0536259	-0.00218306	1.64084	1.00014	0.551202	0.320341	0.18665	0.146641	0.0199746	-0.0101456
	0.406667	2.36037	1.53466	1.01609	0.623421	0.374689	0.136709	0.0514146	-0.00091932	1.64825	1.00718	0.552337	0.314969	0.182832	0.144816	0.0170534	-0.00785263
	0.41	2.36598	1.54262	1.01699	0.627193	0.370973	0.132296	0.0486092	9.563e-05	1.65314	1.01079	0.557978	0.321389	0.186837	0.148303	0.0200709	-0.0097309
	0.413333	2.36959	1.53557	1.01599	0.631532	0.367897	0.132974	0.0527019	-0.0024061	1.66057	1.00667	0.560851	0.32235	0.18635	0.146845	0.0226134	-0.00624927
	0.416667	2.37594	1.54381	1.02448	0.632199	0.375372	0.131526	0.0523042	-0.00170086	1.66541	1.01474	0.560014	0.315663	0.187058	0.146974	0.0177665	-0.0073845
	0.42	2.37885	1.54224	1.02172	0.631658	0.374922	0.131024	0.05374	-0.00313232	1.67008	1.01526	0.558602	0.321124	0.188254	0.146052	0.0190296	-0.00651451
	0.423333	2.38762	1.54694	1.02197	0.636693	0.375616	0.134951	0.0540771	-0.00093029	1.67866	1.02458	0.562406	0.323415	0.188978	0.144536	0.0170342	-0.0133813
	0.426667	2.3955	1.55012	1.02256	0.63278	0.373436	0.133205	0.0568222	-0.00178717	1.68254	1.02531	0.564886	0.32192	0.186102	0.149382	0.0208567	-0.0109256
	0.43	2.39595	1.55371	1.025	0.633985	0.377301	0.139183	0.0549575	-0.00233398	1.69001	1.02564	0.564513	0.325464	0.188079	0.151635	0.0213599	-0.00228437
	0.433333	2.40221	1.55771	1.02852	0.634877	0.377848	0.132974	0.0551675	-0.00358699	1.69722	1.03089	0.56915	0.32145	0.190751	0.143617	0.0230432	-0.0102269
	0.436667	2.40996	1.56113	1.03123	0.639758	0.372623	0.134745	0.0553185	-0.00141869	1.69801	1.03404	0.570701	0.320046	0.188823	0.148658	0.0220506	-0.0103531
	0.44	2.41855	1.56434	1.0312	0.639759	0.381382	0.137729	0.0582313	-0.00083516	1.70552	1.03428	0.569698	0.318491	0.188724	0.144362	0.0189744	-0.0140073
	0.443333	2.41625	1.56949	1.03526	0.642447	0.377681	0.136493	0.053832	-0.00056086	1.70947	1.04209	0.571567	0.319292	0.190562	0.151593	0.01765	-0.00797625
	0.446667	2.42015	1.56449	1.02883	0.642396	0.382316	0.13288	0.0572789	0.00076534	1.71056	1.0443	0.573834	0.325434	0.193131	0.148058	0.0218066	-0.00982519
	0.45	2.42875	1.56941	1.03777	0.642027	0.379944	0.135951	0.0607623	0.00037481	1.72323	1.045	0.575874	0.323913	0.187431	0.149855	0.0160254	-0.012335
	0.453333	2.43254	1.5734	1.03747	0.641646	0.379472	0.134692	0.0538115	-0.00259231	1.73056	1.04532	0.577824	0.321272	0.190047	0.147126	0.0194172	-0.00832065
	0.456667	2.43991	1.57828	1.0386	0.643151	0.379537	0.133869	0.0554696	-6.388e-05	1.73162	1.05328	0.572432	0.330853	0.192843	0.149113	0.0196984	-0.0130062
	0.46	2.43848	1.57768	1.03475	0.641223	0.383033	0.140324	0.0587802	1.278e-05	1.74037	1.05507	0.576596	0.321934	0.190379	0.151977	0.0224494	-0.00554391
	0.463333	2.4466	1.58261	1.04514	0.64935	0.382332	0.134883	0.0569935	-0.00249432	1.74722	1.05803	0.578371	0.323728	0.189706	0.149562	0.0176559	-0.0124507
	0.466667	2.44905	1.58288	1.0487	0.647118	0.382108	0.136724	0.0573332	0.00049998	1.74989	1.06464	0.577913	0.325123	0.188851	0.147132	0.0182659	-0.013983
	0.47	2.46001	1.59225	1.04996	0.645982	0.377978	0.136703	0.0581195	-0.00026403	1.75622	1.06601	0.581911	0.32934	0.191712	0.147034	0.0187311	-0.0114377
	0.473333	2.46292	1.58895	1.04488	0.646692	0.384986	0.139311	0.0570311	-0.00580666	1.76325	1.064	0.581687	0.327626	0.186854	0.152095	0.0190941	-0.0130299
	0.476667	2.46402	1.59089	1.0492	0.644702	0.385941	0.133303	0.0585713	-0.0022764	1.76581	1.06792	0.582042	0.330216	0.190668	0.147093	0.0184562	-0.010298
	0.48	2.47	1.5978	1.05036	0.648943	0.384704	0.137632	0.0591602	-0.00428138	1.77306	1.07441	0.584264	0.330103	0.193245	0.151203	0.0236695	-0.00793858
	0.483333	2.47801	1.60392	1.04668	0.649398	0.384292	0.137773	0.0609862	-0.0042207	1.7806	1.07752	0.584034	0.329194	0.187143	0.151178	0.021223	-0.0112334
	0.486667	2.47945	1.60459	1.05362	0.652234	0.383087	0.134059	0.0600625	-0.00228796	1.78225	1.08148	0.581541	0.328361	0.19078	0.145821	0.0187569	-0.0131302
	0.49	2.4882	1.60787	1.05567	0.650546	0.385115	0.138786	0.0603139	-0.0018761	1.79018	1.08202	0.582898	0.331725	0.191448	0.148441	0.0231701	-0.0123655
	0.493333	2.48967	1.60718	1.05796	0.65231	0.387138	0.135721	0.0613966	-0.00136099	1.79641	1.0883	0.587781	0.331132	0.194012	0.149977	0.0204315	-0.0111111
	0.496667	2.4942	1.61159	1.05269	0.652952	0.388678	0.136206	0.0577618	-0.00290964	1.79989	1.08899	0.588958	0.328723	0.193096	0.151037	0.0185531	-0.0133593
	0.5	2.49993	1.61139	1.05783	0.653746	0.386921	0.133576	0.0598303	-0.00408659	1.80921	1.09487	0.58925	0.328523	0.191662	0.151583	0.0168668	-0.0111811
	0.503333	2.50498	1.61887	1.0617	0.657929	0.386958	0.142309	0.060817	-0.00207744	1.81225	1.09543	0.590317	0.330513	0.194376	0.151183	0.0193001	-0.00766559
	0.506667	2.51154	1.61989	1.06493	0.654482	0.388313	0.14021	0.0594652	0.00036218	1.81528	1.10129	0.589326	0.334966	0.195787	0.14795	0.0191184	-0.0132211
	0.51	2.5144	1.6191	1.06646	0.655433	0.387676	0.136382	0.0634961	-0.00358627	1.81956	1.10287	0.594764	0.332263	0.192467	0.151708	0.021929	-0.00837167
	0.513333	2.51961	1.62267	1.06501	0.658188	0.389067	0.140445	0.0644075	0.0009258	1.83166	1.10267	0.598973	0.33416	0.189392	0.151431	0.0201186	-0.0114559
	0.516667	2.52496	1.62821	1.0723	0.657485	0.387667	0.135859	0.0603946	-0.00098894	1.83138	1.1053	0.595605	0.331542	0.191855	0.152263	0.0186813	-0.0064561
	0.52	2.52684	1.62829	1.0699	0.65892	0.389786	0.138747	0.0585242	-0.00648163	1.83591	1.11143	0.597127	0.331634	0.19847	0.153785	0.0219889	-0.00955256
	0.523333	2.53525	1.6324	1.07152	0.658971	0.391652	0.136776	0.0626025	0.00243702	1.84242	1.11566	0.599244	0.333445	0.193538	0.151568	0.01437	-0.007382
	0.526667	2.53862	1.6341	1.07104	0.656774	0.391677	0.137394	0.0623756	-0.00594101	1.84585	1.11857	0.598823	0.330987	0.193648	0.149065	0.0191487	-0.0124164
	0.53	2.54492	1.63811	1.07155	0.658356	0.390569	0.145287	0.0626658	-0.00540636	1.85278	1.11981	0.59998	0.338194	0.196564	0.151819	0.0209591	-0.0113701
	0.533333	2.54962	1.63908	1.07723	0.659907	0.393453	0.138233	0.0603603	-0.00374971	1.8596	1.12199	0.602058	0.331819	0.193631	0.151411	0.0151771	-0.0151012
	0.536667	2.55072	1.64659	1.07818	0.661264	0.393295	0.138703	0.0646947	-0.00466285	1.86287	1.12297	0.604776	0.337491	0.197475	0.150716	0.020512	-0.0105279
	0.54	2.55913	1.64634	1.08037	0.662403	0.39086	0.141126	0.0622629	-0.00686798	1.86774	1.12938	0.601847	0.333674	0.19702	0.150621	0.0221776	-0.00906225
	0.543333	2.56543	1.64902	1.08025	0.663041	0.39141	0.142312	0.0639456	0.00158026	1.87548	1.13306	0.605614	0.334998	0.195109	0.149252	0.0205932	-0.0106984
	0.546667	2.56938	1.65141	1.08095	0.661251	0.396738	0.141969	0.0624934	-0.00210605	1.87912	1.13279	0.605685	0.342758	0.192226	0.150362	0.0214241	-0.0124291
	0.55	2.57192	1.65242	1.08069	0.666256	0.398503	0.14103	0.0637375	-0.00463531	1.8831	1.1325	0.606723	0.338124	0.19888	0.152171	0.0196923	-0.01115
	0.553333	2.58088	1.66401	1.08618	0.663573	0.391592	0.141702	0.0612041	-0.00340293	1.89446	1.14064	0.611192	0.335048	0.195207	0.154877	0.0209777	-0.0133183
	0.556667	2.57908	1.66298	1.08564	0.666308	0.393235	0.139052	0.0634199	-0.00086842	1.89507	1.14541	0.611649	0.339787	0.195168	0.154382	0.0212852	-0.0140265
	0.56	2.58381	1.66348	1.08613	0.664981	0.393016	0.142948	0.0653975	-0.00264535	1.90042	1.14711	0.61325	0.339103	0.19331	0.152893	0.0226296	-0.0110731
	0.563333	2.59133	1.665	1.08458	0.670646	0.395592	0.141483	0.0615796	-0.00356934	1.9048	1.15	0.614589	0.338095	0.192153	0.153713	0.0210733	-0.0111388
	0.566667	2.58913	1.66588	1.08893	0.669064	0.396995	0.141039	0.0646152	-0.00179027	1.90594	1.14972	0.617531	0.334678	0.195801	0.155099	0.0170302	-0.0123282
	0.57	2.60393	1.67041	1.09207	0.66757	0.393793	0.141924	0.0635829	-0.00705085	1.91514	1.1521	0.613066	0.338693	0.202334	0.152164	0.0227459	-0.00849279
	0.573333	2.60741	1.67544	1.08969	0.667581	0.397601	0.143508	0.0648148	-0.00587712	1.9179	1.15803	0.61606	0.339954	0.192872	0.155665	0.0206558	-0.00853523
	0.576667	2.61286	1.6759	1.09154	0.673343	0.399969	0.13941	0.0633987	-0.00242899	1.9226	1.16025	0.617609	0.339224	0.196203	0.154764	0.0208323	-0.013027
	0.58	2.61264	1.68252	1.09799	0.670208	0.399003	0.142252	0.0672723	-0.00321398	1.92834	1.16396	0.617136	0.339388	0.195331	0.152432	0.0184466	-0.0107213
	0.583333	2.614	1.68179	1.09618	0.672491	0.394635	0.143917	0.0628189	-0.00310491	1.93656	1.16555	0.618596	0.342024	0.195612	0.152409	0.0193913	-0.0147266
	0.586667	2.62843	1.68359	1.09989	0.674522	0.396799	0.144398	0.0643356	-0.00723694	1.94192	1.16732	0.619454	0.337996	0.196269	0.153701	0.0204765	-0.0110533
	0.59	2.62461	1.68702	1.10089	0.675715	0.399687	0.140085	0.0621191	-0.00711427	1.94201	1.17591	0.623247	0.340654	0.197963	0.150297	0.0174214	-0.0122445
	0.593333	2.63231	1.69407	1.0974	0.675013	0.400495	0.140394	0.0615414	-0.00690208	1.94865	1.17502	0.621893	0.339289	0.195455	0.154184	0.0148565	-0.0135585
	0.596667	2.63913	1.69045	1.10289	0.67674	0.40413	0.141011	0.0657482	-0.00694237	1.95505	1.17453	0.623005	0.337953	0.198267	0.151861	0.0187837	-0.0101783
	0.6	2.64308	1.69631	1.09754	0.673784	0.402947	0.144577	0.0665668	-0.00423692	1.95949	1.18531	0.624301	0.340481	0.198081	0.154788	0.0164742	-0.0096242
	0.603333	2.64501	1.69933	1.10623	0.677942	0.401985	0.14438	0.0647303	-0.00266502	1.96464	1.17904	0.625561	0.346776	0.19841	0.158025	0.0212666	-0.0124002
	0.606667	2.64776	1.69908	1.11202	0.679579	0.402549	0.142612	0.0626706	-0.00583504	1.96607	1.18886	0.628311	0.344611	0.197258	0.154325	0.0173045	-0.0132048
	0.61	2.65541	1.70637	1.10778	0.67897	0.402352	0.146654	0.0626923	-0.00689576	1.9696	1.18732	0.6287	0.344207	0.19881	0.154475	0.0188667	-0.0128654
	0.613333	2.65976	1.70893	1.11077	0.679049	0.401696	0.14013	0.0657694	-0.004423	1.97725	1.18839	0.623573	0.345431	0.197456	0.153585	0.0202572	-0.0126578
	0.616667	2.66318	1.70866	1.11206	0.683492	0.396994	0.141779	0.0619931	-0.00849471	1.98068	1.19512	0.631593	0.341912	0.195795	0.158107	0.0184699	-0.0114191
	0.62	2.66934	1.71189	1.11683	0.681364	0.407113	0.144059	0.0650219	-0.00509963	1.98945	1.19653	0.632478	0.33906	0.195996	0.155763	0.0188042	-0.0105024
	0.623333	2.6726	1.71501	1.10987	0.681026	0.405795	0.144691	0.0618884	-0.00647018	1.99377	1.1952	0.632541	0.346643	0.201405	0.154525	0.0211978	-0.0113806
	0.626667	2.67745	1.71713	1.11263	0.681912	0.402286	0.14707	0.0666064	-0.00266633	1.99495	1.19859	0.630689	0.345118	0.201106	0.156709	0.020954	-0.0143528
	0.63	2.68098	1.7202	1.11644	0.683339	0.401512	0.147816	0.0651994	-0.00479541	2.00431	1.20773	0.635071	0.34362	0.196921	0.157035	0.0197357	-0.0139821
	0.633333	2.6838	1.71986	1.12094	0.683969	0.404178	0.141937	0.0678117	-0.0055475	2.00715	1.20722	0.634478	0.349242	0.204972	0.154834	0.0228052	-0.00626083
	0.636667	2.68634	1.71984	1.11665	0.680928	0.402786	0.141963	0.0631064	-0.00402818	2.0102	1.20998	0.636968	0.342506	0.20149	0.153883	0.0182221	-0.0103064
	0.64	2.69392	1.72877	1.12177	0.682815	0.406976	0.143864	0.06924	-0.00159274	2.01703	1.21398	0.634361	0.34607	0.195084	0.157436	0.018406	-0.0120623
	0.643333	2.69773	1.734	1.12265	0.684923	0.406244	0.14147	0.0657891	-0.00371836	2.01945	1.21133	0.639986	0.345163	0.199813	0.158241	0.0196215	-0.0117001
	0.646667	2.7038	1.73499	1.12268	0.690306	0.400989	0.145427	0.0697764	-0.00415192	2.02243	1.22025	0.635385	0.347065	0.200568	0.15634	0.015723	-0.0107545
	0.65	2.70678	1.73362	1.12401	0.684753	0.405331	0.146701	0.0658845	-0.00330148	2.02898	1.22407	0.641495	0.342823	0.196565	0.150089	0.0189533	-0.0135423
	0.653333	2.70812	1.73889	1.12742	0.689982	0.403885	0.145468	0.0678791	-0.00607596	2.03228	1.22454	0.644207	0.348855	0.198547	0.156303	0.0222499	-0.0105382
	0.656667	2.71598	1.7376	1.12606	0.685107	0.405862	0.1437	0.0668349	0.00061538	2.03724	1.2266	0.644146	0.346636	0.199235	0.15482	0.0197969	-0.0124331
	0.66	2.72246	1.74446	1.13216	0.686578	0.403193	0.145678	0.0689677	-0.0017421	2.04107	1.22657	0.644874	0.34334	0.199378	0.153143	0.0177102	-0.0120462
	0.663333	2.72087	1.74258	1.12949	0.69335	0.404539	0.147618	0.0685741	-0.00387559	2.04942	1.23207	0.64432	0.349153	0.198785	0.157606	0.0186683	-0.0105555
	0.666667	2.72904	1.74702	1.13465	0.690186	0.409296	0.143351	0.0701887	-0.00302337	2.05163	1.23573	0.650626	0.348312	0.200995	0.149429	0.0195711	-0.0114125
	0.67	2.72946	1.75242	1.13273	0.694782	0.406757	0.147733	0.0656205	-0.00306509	2.05817	1.23092	0.643392	0.353362	0.200278	0.159927	0.0170996	-0.0120158
	0.673333	2.73749	1.75024	1.13306	0.695657	0.41094	0.140695	0.069015	-0.00413762	2.05767	1.24085	0.641773	0.352939	0.202871	0.159096	0.0193622	-0.0151075
	0.676667	2.74063	1.75402	1.13544	0.693908	0.401672	0.144282	0.0681984	-0.00567863	2.06499	1.24171	0.647963	0.346033	0.203499	0.158614	0.0203464	-0.0100399
	0.68	2.74389	1.75913	1.13922	0.695176	0.410109	0.145921	0.0665717	-0.00597165	2.07168	1.24114	0.653377	0.350922	0.19815	0.15409	0.0178863	-0.00955995
	0.683333	2.74907	1.75778	1.13858	0.694152	0.413158	0.145663	0.0680616	-0.00750361	2.07503	1.24769	0.654136	0.349342	0.20169	0.15657	0.0175092	-0.0152095
	0.686667	2.75407	1.76381	1.14147	0.693665	0.407204	0.146644	0.0677639	-0.0059912	2.08054	1.25187	0.651945	0.351382	0.199527	0.162225	0.0184143	-0.0134944
	0.69	2.75956	1.76258	1.13767	0.697902	0.410289	0.142429	0.0683213	-0.00820098	2.08242	1.25701	0.652586	0.351959	0.203023	0.15616	0.0214743	-0.0155829
	0.693333	2.76632	1.76834	1.14099	0.695404	0.411301	0.143455	0.0698801	-0.00299619	2.08522	1.25767	0.650664	0.354484	0.19752	0.159914	0.0191854	-0.0121629
	0.696667	2.76804	1.77045	1.14355	0.694903	0.41051	0.1407	0.0676423	-0.00302897	2.0997	1.26174	0.653938	0.353997	0.199959	0.159294	0.0204813	-0.013426
	0.7	2.76671	1.77317	1.14526	0.694703	0.408263	0.149126	0.0621502	-0.00631926	2.09533	1.26274	0.656558	0.348883	0.204155	0.155055	0.0223181	-0.0144017
	0.703333	2.77819	1.7761	1.1494	0.697244	0.411871	0.149661	0.0687603	-0.00863383	2.10322	1.26594	0.657297	0.354849	0.200956	0.154103	0.0151575	-0.018624
	0.706667	2.77937	1.77743	1.14472	0.699052	0.408762	0.144812	0.0663679	-0.0075116	2.10274	1.26867	0.660119	0.357461	0.203688	0.154569	0.0184348	-0.011617
	0.71	2.78342	1.78315	1.14961	0.700376	0.410053	0.149805	0.0679383	-0.00670085	2.10958	1.27198	0.659907	0.352548	0.202829	0.155584	0.0187982	-0.0124359
	0.713333	2.78664	1.78203	1.14918	0.700371	0.41	0.143352	0.0700622	-0.00490985	2.11843	1.27093	0.663032	0.348896	0.199649	0.159967	0.0183742	-0.0112793
	0.716667	2.79524	1.78748	1.151	0.703091	0.411299	0.143316	0.0677832	-0.00667415	2.11847	1.2757	0.659387	0.352066	0.200061	0.158216	0.0191118	-0.0173258
	0.72	2.79658	1.78373	1.15409	0.703788	0.412742	0.143404	0.0712999	-0.00713752	2.12343	1.27769	0.662158	0.354172	0.199916	0.155004	0.0200175	-0.0147799
	0.723333	2.8013	1.78687	1.15517	0.701857	0.413945	0.148149	0.0694563	-0.00742243	2.12633	1.28218	0.663165	0.354764	0.203479	0.155314	0.0182622	-0.0117656
	0.726667	2.80458	1.7902	1.1507	0.705485	0.4129	0.148495	0.0705916	-0.00357614	2.13458	1.28445	0.663193	0.352567	0.201438	0.155894	0.0200653	-0.0151474
	0.73	2.80482	1.7965	1.15649	0.702278	0.415897	0.155727	0.0721361	-0.00410483	2.13415	1.28736	0.665506	0.353516	0.202293	0.157509	0.0172404	-0.010046
	0.733333	2.80872	1.79986	1.15845	0.7031	0.410674	0.143593	0.0677508	-0.00830553	2.14214	1.28838	0.666491	0.353767	0.198199	0.159481	0.0193022	-0.0114041
	0.736667	2.82014	1.80144	1.16522	0.704298	0.414256	0.148545	0.073142	-0.00669454	2.14209	1.28932	0.669116	0.3538	0.204043	0.15946	0.0193307	-0.015002
	0.74	2.817	1.80384	1.16014	0.705213	0.415381	0.146656	0.0719577	-0.0028982	2.15484	1.29324	0.666455	0.357504	0.201884	0.155875	0.0181342	-0.012508
	0.743333	2.82775	1.80535	1.16405	0.708197	0.417207	0.144949	0.0706849	-0.00909565	2.15395	1.29559	0.670383	0.357733	0.204903	0.159226	0.0219889	-0.010954
	0.746667	2.83267	1.80773	1.1623	0.706896	0.415383	0.145172	0.0724325	-0.00425063	2.15528	1.29447	0.671338	0.353714	0.198924	0.159562	0.0197816	-0.0145
	0.75	2.83567	1.80455	1.16548	0.706356	0.415965	0.146492	0.0730202	-0.00493799	2.16148	1.3008	0.670171	0.357116	0.202948	0.155457	0.0182014	-0.0135028
	0.753333	2.83931	1.81207	1.16755	0.708851	0.415218	0.149345	0.0735884	-0.00602518	2.16624	1.3043	0.670841	0.358181	0.200268	0.155398	0.0157779	-0.0107705
	0.756667	2.84447	1.8095	1.1733	0.703875	0.418677	0.145172	0.0732491	-0.00640009	2.16904	1.30573	0.675158	0.355136	0.198031	0.157631	0.020039	-0.0110285
	0.76	2.8438	1.82004	1.17242	0.713229	0.416966	0.142553	0.0704285	-0.00449536	2.17151	1.31145	0.672413	0.35747	0.197876	0.158369	0.0189433	-0.0154148
	0.763333	2.84933	1.81783	1.16889	0.712329	0.417005	0.145441	0.0704578	-0.00357638	2.18291	1.31308	0.67334	0.355961	0.203083	0.157006	0.0201886	-0.0130905
	0.766667	2.85402	1.82092	1.17298	0.707144	0.417173	0.146289	0.0709766	-0.00619719	2.18515	1.31186	0.676214	0.358808	0.202018	0.159902	0.0176833	-0.0177191
	0.77	2.85936	1.8194	1.17353	0.709877	0.415644	0.142903	0.0737394	-0.0073354	2.18511	1.3192	0.678532	0.354037	0.204297	0.157139	0.0206435	-0.0149444
	0.773333	2.86051	1.82179	1.17545	0.711614	0.416922	0.148886	0.0761908	-0.00633667	2.19273	1.32121	0.680173	0.35882	0.20409	0.159665	0.0153989	-0.00991138
	0.776667	2.86141	1.8295	1.17697	0.713042	0.417308	0.148127	0.0725807	-0.00763152	2.19546	1.31854	0.685246	0.360198	0.198659	0.161344	0.0142459	-0.0134009
	0.78	2.86776	1.83206	1.17983	0.71957	0.418838	0.148455	0.0764583	-0.00613294	2.19808	1.32423	0.682385	0.362162	0.202844	0.157927	0.0182281	-0.0175024
	0.783333	2.87225	1.83257	1.17846	0.716019	0.417599	0.147818	0.0723394	-0.00937198	2.20806	1.3309	0.677779	0.358494	0.206199	0.157099	0.0181552	-0.0112248
	0.786667	2.87855	1.83626	1.17862	0.715354	0.42019	0.149974	0.0731108	-0.0111905	2.20571	1.33325	0.682766	0.358328	0.201496	0.160616	0.0176768	-0.0121411
	0.79	2.87657	1.83665	1.18101	0.712861	0.419419	0.14632	0.0689024	-0.00778912	2.21443	1.32665	0.679952	0.357157	0.203915	0.159245	0.0158639	-0.0121599
	0.793333	2.88156	1.84086	1.17972	0.717515	0.421685	0.148738	0.0718754	-0.00727997	2.21615	1.34031	0.685452	0.362355	0.202896	0.161604	0.0208122	-0.0136009
	0.796667	2.8871	1.8423	1.18331	0.715651	0.419482	0.146427	0.0733402	-0.00641594	2.21899	1.34278	0.686457	0.359124	0.201332	0.157914	0.0200585	-0.0185459
	0.8	2.88961	1.84775	1.18848	0.712053	0.417601	0.146323	0.0700242	-0.00279603	2.22484	1.34246	0.688447	0.356988	0.201253	0.15575	0.0176002	-0.0171277
	0.803333	2.89646	1.8474	1.18641	0.720758	0.419959	0.146652	0.0720902	-0.0121144	2.22837	1.34145	0.686072	0.358646	0.203597	0.158255	0.0184521	-0.0129938
	0.806667	2.90448	1.84888	1.19129	0.717006	0.422377	0.144486	0.0729334	-0.00633762	2.23513	1.34683	0.690306	0.361913	0.202717	0.157961	0.01422	-0.0161898
	0.81	2.90499	1.85355	1.18867	0.717543	0.425127	0.147329	0.0752146	-0.0111081	2.2348	1.34862	0.693476	0.362064	0.20193	0.159049	0.0186499	-0.0132235
	0.813333	2.90591	1.85566	1.19181	0.718075	0.425651	0.150633	0.076473	-0.0057839	2.24381	1.34961	0.688947	0.362344	0.200812	0.15877	0.0182918	-0.0125501
	0.816667	2.91216	1.85479	1.19276	0.718128	0.423443	0.15054	0.0748672	-0.00484107	2.24434	1.35454	0.693047	0.361529	0.203041	0.15989	0.0148826	-0.0153225
	0.82	2.91561	1.86124	1.19449	0.715985	0.419915	0.146748	0.0757685	-0.0115905	2.2495	1.35746	0.690456	0.363036	0.204736	0.15891	0.019115	-0.0109931
	0.823333	2.92134	1.8605	1.19414	0.720629	0.420989	0.14823	0.074795	-0.00787292	2.2504	1.35579	0.690051	0.360168	0.205668	0.159051	0.0163715	-0.0158711
	0.826667	2.92014	1.86324	1.1958	0.721247	0.419566	0.150692	0.0728619	-0.00707159	2.25956	1.36071	0.697728	0.364208	0.204727	0.160248	0.0161511	-0.012381
	0.83	2.92681	1.86747	1.19545	0.722307	0.421446	0.145579	0.0720332	-0.00888143	2.25699	1.36112	0.695264	0.365026	0.205265	0.158406	0.0146177	-0.0166817
	0.833333	2.9271	1.86925	1.19984	0.721678	0.423664	0.148335	0.0743277	-0.00358532	2.26792	1.36647	0.697113	0.365468	0.201701	0.161348	0.0196534	-0.0181195
	0.836667	2.93388	1.87335	1.20386	0.724543	0.426105	0.150987	0.0719234	-0.00923155	2.27106	1.36867	0.700337	0.36067	0.204148	0.158972	0.0176061	-0.0146273
	0.84	2.94217	1.87725	1.20112	0.726056	0.422159	0.151278	0.0734975	-0.00537823	2.27408	1.37091	0.695729	0.365719	0.200334	0.160599	0.0200063	-0.0169525
	0.843333	2.94522	1.87575	1.2032	0.727676	0.424799	0.151122	0.0741069	-0.0102247	2.27173	1.37306	0.703201	0.365301	0.202059	0.158714	0.014578	-0.0184764
	0.846667	2.94939	1.87727	1.20093	0.726671	0.426046	0.15104	0.0731301	-0.00489996	2.28218	1.37766	0.702596	0.36815	0.204667	0.158094	0.0189875	-0.0140694
	0.85	2.94803	1.88176	1.20741	0.726479	0.424761	0.150816	0.0720366	-0.00786612	2.28498	1.3767	0.703014	0.365418	0.209186	0.158268	0.0188568	-0.0182151
	0.853333	2.951	1.88353	1.20797	0.72609	0.421101	0.146651	0.0742323	-0.0099195	2.28753	1.38067	0.703173	0.363893	0.206949	0.156729	0.0180945	-0.0115709
	0.856667	2.96199	1.88341	1.20225	0.727073	0.423775	0.145671	0.0718342	-0.00619588	2.28637	1.38326	0.702603	0.364182	0.205037	0.161942	0.0150198	-0.0121651
	0.86	2.9627	1.89043	1.20724	0.72605	0.428309	0.149827	0.0786619	-0.0102051	2.2966	1.38678	0.703418	0.364117	0.207371	0.160341	0.0201051	-0.0168196
	0.863333	2.96418	1.8925	1.20965	0.730808	0.424581	0.146598	0.07464	-0.00623749	2.29492	1.38472	0.702793	0.366663	0.208392	0.158983	0.0178429	-0.0179837
	0.866667	2.96875	1.89601	1.20963	0.727415	0.426138	0.148589	0.0762843	-0.00260339	2.30118	1.39018	0.706301	0.367851	0.204124	0.15568	0.0188403	-0.0142752
	0.87	2.97306	1.89853	1.21345	0.727768	0.428881	0.152252	0.073271	-0.00579629	2.30741	1.39736	0.707968	0.362918	0.206124	0.158747	0.0203978	-0.0127334
	0.873333	2.9778	1.89453	1.21215	0.728249	0.425831	0.154498	0.0767398	-0.00847719	2.31108	1.39979	0.707632	0.362753	0.206341	0.156502	0.0179364	-0.0218925
	0.876667	2.98143	1.89943	1.21749	0.733221	0.424916	0.149959	0.0712809	-0.00838564	2.3143	1.39876	0.714646	0.36642	0.206552	0.156327	0.0164685	-0.0143892
	0.88	2.98249	1.9061	1.21316	0.730573	0.423541	0.147994	0.0730586	-0.00890742	2.31599	1.40104	0.704852	0.3657	0.206723	0.16107	0.0145491	-0.0180376
	0.883333	2.98703	1.90287	1.21573	0.733234	0.429718	0.152098	0.0760358	-0.00758503	2.32133	1.40635	0.711394	0.369313	0.202268	0.156513	0.0166991	-0.0172119
	0.886667	2.98968	1.90656	1.21721	0.732132	0.426055	0.151275	0.0783735	-0.0120683	2.33102	1.40981	0.708529	0.369088	0.206289	0.157677	0.0187028	-0.0120868
	0.89	2.99287	1.90699	1.2156	0.732342	0.425994	0.150302	0.0778862	-0.00600253	2.32788	1.40674	0.714515	0.36668	0.205787	0.159672	0.017736	-0.0123736
	0.893333	2.99728	1.90951	1.22139	0.730541	0.42706	0.1509	0.0765955	-0.00428412	2.33577	1.41647	0.715021	0.370084	0.207098	0.159686	0.0180715	-0.0162983
	0.896667	3.00105	1.91226	1.22151	0.735344	0.430354	0.151631	0.0792556	-0.00820313	2.33712	1.41177	0.716869	0.369244	0.205007	0.160523	0.0178753	-0.0147368
	0.9	3.00666	1.91358	1.22253	0.733832	0.426551	0.151505	0.0741413	-0.0104896	2.3433	1.412	0.718326	0.363707	0.202301	0.159577	0.0158724	-0.0180161
	0.903333	3.00711	1.91642	1.22785	0.742993	0.423829	0.152391	0.0742251	-0.0118841	2.34189	1.41869	0.7179	0.372255	0.204752	0.154099	0.0176003	-0.0177456
	0.906667	3.00967	1.92014	1.22687	0.736717	0.429283	0.14903	0.0773269	-0.0106125	2.34275	1.42205	0.716603	0.369054	0.204434	0.160426	0.0197759	-0.0149034
	0.91	3.01834	1.92457	1.22168	0.738023	0.426662	0.154627	0.0769822	-0.0115176	2.34983	1.42378	0.714624	0.372305	0.209345	0.161394	0.0169942	-0.0136641
	0.913333	3.01709	1.92317	1.22823	0.739039	0.429147	0.154411	0.0788252	-0.00682793	2.35809	1.43035	0.720178	0.368306	0.206257	0.160029	0.0176783	-0.0178038
	0.916667	3.02588	1.93114	1.23166	0.73718	0.428038	0.148367	0.0747669	-0.0127113	2.36	1.43141	0.720183	0.368283	0.206788	0.16224	0.0185672	-0.0184799
	0.92	3.03406	1.92801	1.22656	0.73544	0.430521	0.151213	0.0771581	-0.00860951	2.36096	1.43115	0.723664	0.367094	0.208298	0.161105	0.0205393	-0.0155997
	0.923333	3.03017	1.93591	1.23325	0.73942	0.430796	0.150576	0.0774936	-0.00841067	2.36362	1.4369	0.724937	0.367714	0.203979	0.162065	0.0214143	-0.0159909
	0.926667	3.0356	1.93232	1.23022	0.737117	0.430762	0.154989	0.0747446	-0.0122875	2.37049	1.43742	0.726827	0.373975	0.203871	0.159367	0.0154757	-0.0202287
	0.93	3.0336	1.93253	1.23635	0.743266	0.432091	0.153034	0.0725394	-0.00750027	2.37218	1.43571	0.72546	0.371126	0.210439	0.158265	0.0181055	-0.0174871
	0.933333	3.04113	1.93468	1.23665	0.740157	0.429142	0.14861	0.0722459	-0.0121021	2.37436	1.43718	0.725782	0.369196	0.206259	0.161604	0.0202705	-0.0123994
	0.936667	3.04362	1.93963	1.23685	0.741005	0.42759	0.149172	0.0754444	-0.00775228	2.37881	1.44196	0.726115	0.37467	0.204291	0.159368	0.0243201	-0.0148742
	0.94	3.0478	1.94228	1.24088	0.744327	0.42917	0.153271	0.0755657	-0.0103212	2.38723	1.44511	0.726177	0.373498	0.204343	0.162586	0.0208861	-0.013736
	0.943333	3.05261	1.94713	1.2388	0.742709	0.431247	0.152187	0.0790702	-0.0101741	2.3879	1.44605	0.727481	0.371367	0.207064	0.163199	0.0168623	-0.0182314
	0.946667	3.05914	1.94614	1.24081	0.741132	0.430842	0.152027	0.0731108	-0.00871418	2.38852	1.45074	0.73091	0.37215	0.211728	0.161495	0.0219385	-0.0142756
	0.95	3.05913	1.9527	1.24738	0.744206	0.431877	0.153148	0.0762489	-0.00979302	2.39334	1.45402	0.730704	0.374685	0.210272	0.156818	0.0151647	-0.0153225
	0.953333	3.06178	1.95387	1.246	0.742024	0.431415	0.147749	0.0770378	-0.0147182	2.39871	1.45801	0.729514	0.370512	0.200899	0.157559	0.0197132	-0.0120669
	0.956667	3.07205	1.95435	1.24504	0.741752	0.435229	0.152777	0.0783279	-0.00996278	2.40287	1.45924	0.73339	0.373479	0.205304	0.161135	0.0197867	-0.0157469
	0.96	3.0686	1.95778	1.24317	0.746999	0.435705	0.154518	0.0779886	-0.0118008	2.40831	1.46101	0.73142	0.372602	0.210088	0.162394	0.0203478	-0.0179399
	0.963333	3.07035	1.96069	1.24864	0.74634	0.430314	0.146423	0.0752301	-0.0110818	2.41368	1.46166	0.730711	0.372678	0.207717	0.161541	0.0151547	-0.0138738
	0.966667	3.07522	1.96337	1.25152	0.746757	0.431053	0.151215	0.0766079	-0.010051	2.41269	1.46194	0.736744	0.37439	0.20778	0.158874	0.0202123	-0.0154372
	0.97	3.08295	1.96757	1.24793	0.744007	0.429906	0.153464	0.0747328	-0.0021498	2.41327	1.46937	0.734306	0.375588	0.205894	0.15997	0.0198126	-0.0175385
	0.973333	3.08516	1.96379	1.24835	0.746804	0.433136	0.149197	0.0785072	-0.00841008	2.41416	1.47049	0.737707	0.370689	0.208003	0.158806	0.0220682	-0.0169374
	0.976667	3.08955	1.96293	1.24919	0.745791	0.433206	0.153374	0.0831059	-0.0102944	2.42363	1.46445	0.735282	0.377937	0.206588	0.158634	0.0204729	-0.0154684
	0.98	3.08891	1.96741	1.25258	0.747717	0.431047	0.152028	0.0783284	-0.00702117	2.42346	1.46994	0.738978	0.373929	0.205527	0.164732	0.0214508	-0.01896
	0.983333	3.09498	1.97507	1.25504	0.747806	0.432017	0.150113	0.0767002	-0.00742731	2.42559	1.47428	0.740671	0.372929	0.209787	0.16137	0.0202318	-0.0151279
	0.986667	3.09925	1.97609	1.25426	0.751731	0.432641	0.153124	0.0775566	-0.00996039	2.43352	1.4816	0.743906	0.375732	0.201719	0.162503	0.0177834	-0.0168199
	0.99	3.10371	1.97593	1.25542	0.750051	0.433296	0.152455	0.0826591	-0.0119941	2.43514	1.48397	0.74193	0.376261	0.208499	0.156653	0.0144781	-0.014939
	0.993333	3.10458	1.98056	1.25878	0.747804	0.432999	0.151323	0.0793627	-0.0118928	2.43761	1.48476	0.745138	0.373404	0.211262	0.163699	0.0165401	-0.0156486
	0.996667	3.10649	1.9828	1.25745	0.752459	0.431759	0.15657	0.0745221	-0.00416766	2.44277	1.48967	0.743443	0.371792	0.20658	0.162984	0.0176705	-0.0175672
	1	3.11134	1.98267	1.2596	0.752887	0.43124	0.153804	0.0785363	-0.0116845	2.44886	1.48729	0.742109	0.375711	0.212203	0.161076	0.017465	-0.0137677
	1.00333	3.10843	1.98694	1.26012	0.751815	0.436407	0.153977	0.0751947	-0.0104796	2.44873	1.49323	0.745764	0.378918	0.204256	0.163435	0.0173684	-0.0182106
	1.00667	3.11699	1.9919	1.25917	0.750794	0.440623	0.151951	0.0779095	-0.0124953	2.45381	1.49406	0.744977	0.375541	0.209693	0.16416	0.0171291	-0.0207301
	1.01	3.12293	1.9919	1.25978	0.748369	0.435352	0.147468	0.0742881	-0.0109879	2.45885	1.49088	0.748033	0.378112	0.205733	0.159255	0.0192083	-0.019444
	1.01333	3.12638	1.99875	1.2651	0.751306	0.435889	0.149633	0.0748622	-0.0107655	2.46108	1.49337	0.747866	0.372756	0.208608	0.164152	0.020979	-0.0142164
	1.01667	3.12994	1.99693	1.26553	0.754265	0.433206	0.153479	0.0790541	-0.0100715	2.46276	1.49845	0.749925	0.373471	0.207683	0.159985	0.0198516	-0.0197156
	1.02	3.12604	1.99683	1.27072	0.752641	0.440638	0.151028	0.0789167	-0.00991342	2.46352	1.4999	0.75004	0.377307	0.205725	0.158993	0.0170218	-0.0139473
	1.02333	3.13172	2.00263	1.26987	0.756374	0.438172	0.153478	0.0744413	-0.00807128	2.4693	1.50333	0.747589	0.379025	0.208517	0.161166	0.0136302	-0.019401
	1.02667	3.13798	2.00036	1.26638	0.754763	0.433001	0.148851	0.0781896	-0.00889764	2.47862	1.5103	0.747897	0.37675	0.206461	0.16236	0.0143781	-0.0227303
	1.03	3.13974	2.00175	1.27175	0.76004	0.439249	0.153582	0.0798502	-0.00888751	2.47465	1.50662	0.751485	0.374262	0.206238	0.160704	0.0201295	-0.0239515
	1.03333	3.14562	2.00555	1.2734	0.755889	0.437328	0.152477	0.0766775	-0.00934587	2.47682	1.50762	0.752188	0.37801	0.208783	0.16102	0.0163438	-0.0207285
	1.03667	3.15108	2.01184	1.27517	0.754531	0.43736	0.152037	0.0799718	-0.00831864	2.47964	1.5118	0.755249	0.373847	0.209975	0.161589	0.0187816	-0.0208727
	1.04	3.15256	2.01381	1.27427	0.75521	0.436714	0.149329	0.0780526	-0.0112635	2.48594	1.51379	0.754382	0.374942	0.205646	0.16336	0.0173354	-0.0167049
	1.04333	3.15607	2.01061	1.27838	0.76178	0.437744	0.153911	0.078161	-0.0085331	2.48842	1.51846	0.754611	0.381768	0.208012	0.162226	0.0167787	-0.0178289
	1.04667	3.16305	2.01461	1.27647	0.758276	0.440568	0.155058	0.0791434	-0.0125499	2.49162	1.52144	0.757873	0.379026	0.206923	0.15904	0.0149305	-0.0181548
	1.05	3.16146	2.01939	1.27886	0.760131	0.436936	0.15141	0.0787853	-0.013309	2.49218	1.52179	0.759237	0.378314	0.20771	0.163098	0.0226871	-0.0176849
	1.05333	3.16587	2.01674	1.27536	0.759595	0.437058	0.15158	0.0751774	-0.00925289	2.50142	1.52432	0.759472	0.380458	0.206302	0.160473	0.0182638	-0.0164845
	1.05667	3.17121	2.02288	1.27859	0.756994	0.440989	0.155803	0.078317	-0.0115269	2.50144	1.52846	0.761757	0.378688	0.208661	0.158721	0.0174764	-0.020667
	1.06	3.1779	2.02305	1.28009	0.762549	0.437166	0.149665	0.0789322	-0.0144324	2.50654	1.52776	0.760173	0.373873	0.20677	0.159322	0.0167081	-0.0203678
	1.06333	3.17318	2.02757	1.27926	0.761908	0.437058	0.152131	0.0807072	-0.00969456	2.50933	1.53134	0.758345	0.382495	0.20881	0.162118	0.0138729	-0.0178585
	1.06667	3.18096	2.03109	1.28033	0.761716	0.435	0.151682	0.0778017	-0.0104468	2.51177	1.53456	0.761049	0.383957	0.205743	0.162604	0.0132117	-0.0159655
	1.07	3.18147	2.03395	1.2836	0.762212	0.438092	0.149073	0.0770284	-0.00914178	2.51243	1.53897	0.760523	0.379472	0.20825	0.16131	0.0158541	-0.0214901
	1.07333	3.18675	2.03266	1.28381	0.762681	0.440551	0.151759	0.0802232	-0.0107555	2.51739	1.53928	0.765749	0.382334	0.207436	0.158555	0.0168363	-0.0238193
	1.07667	3.18697	2.03836	1.2871	0.763441	0.442641	0.153194	0.0830779	-0.0136306	2.51967	1.54224	0.766281	0.378939	0.209246	0.163179	0.0174588	-0.019013
	1.08	3.19298	2.0378	1.28895	0.765526	0.439814	0.154626	0.0804804	-0.0141382	2.52725	1.54374	0.769301	0.377761	0.209184	0.166541	0.0145463	-0.0191625
	1.08333	3.19378	2.04015	1.29465	0.768873	0.441399	0.154611	0.0799579	-0.01152	2.52535	1.54531	0.76821	0.382511	0.211684	0.158018	0.0180651	-0.017605
	1.08667	3.19745	2.04238	1.29265	0.765982	0.437744	0.152183	0.0800267	-0.0156086	2.53125	1.54844	0.765178	0.383254	0.209731	0.16118	0.0200093	-0.0166976
	1.09	3.19879	2.04447	1.29157	0.764133	0.439663	0.15256	0.0814671	-0.0127936	2.53778	1.55083	0.767579	0.379714	0.205095	0.162974	0.0165133	-0.0220117
	1.09333	3.2056	2.04527	1.29156	0.762406	0.444993	0.155133	0.080403	-0.00817035	2.53561	1.55397	0.769289	0.378635	0.210105	0.163216	0.0183028	-0.0150182
	1.09667	3.2035	2.0507	1.29642	0.768144	0.445362	0.150703	0.081764	-0.00927995	2.54083	1.55213	0.767679	0.381284	0.209434	0.160337	0.0156639	-0.0190284
	1.1	3.21198	2.04759	1.2957	0.766253	0.438748	0.151684	0.0797652	-0.00911091	2.5421	1.55735	0.770326	0.383325	0.208753	0.159955	0.0134978	-0.02389
	1.10333	3.21006	2.04858	1.29954	0.767014	0.447807	0.155253	0.0815178	-0.0119752	2.54904	1.55533	0.77228	0.379831	0.209653	0.160589	0.0172428	-0.0225625
	1.10667	3.21747	2.05663	1.2997	0.768816	0.43958	0.152653	0.0752932	-0.0130149	2.54603	1.56067	0.775569	0.386509	0.208185	0.157379	0.0143229	-0.0130602
	1.11	3.22058	2.05671	1.29723	0.764478	0.441628	0.152686	0.0789481	-0.0124663	2.54995	1.56422	0.774545	0.381664	0.210128	0.160145	0.0182867	-0.0192004
	1.11333	3.22287	2.05526	1.30318	0.767334	0.439573	0.153055	0.080926	-0.0108876	2.55747	1.56232	0.774159	0.383385	0.20407	0.16149	0.0170426	-0.0191704
	1.11667	3.22385	2.06173	1.29792	0.771425	0.442622	0.15597	0.0752821	-0.0133779	2.55696	1.56904	0.771249	0.385162	0.209149	0.157585	0.0204506	-0.0194181
	1.12	3.22913	2.06385	1.30257	0.770925	0.438667	0.154554	0.076406	-0.0111029	2.56206	1.56856	0.775765	0.383156	0.208561	0.163499	0.0132902	-0.0150061
	1.12333	3.23596	2.06201	1.30629	0.76967	0.439553	0.156428	0.0839176	-0.00915859	2.56367	1.57284	0.77854	0.38189	0.209142	0.159862	0.0127816	-0.0178489
	1.12667	3.23385	2.06831	1.30325	0.777032	0.441199	0.157406	0.0770664	-0.0115965	2.56303	1.57205	0.779479	0.383181	0.209888	0.166354	0.0158917	-0.0184223
	1.13	3.24011	2.07277	1.30635	0.770828	0.440305	0.153756	0.0813478	-0.00574789	2.56976	1.57528	0.779741	0.384059	0.208326	0.164685	0.0161507	-0.0201202
	1.13333	3.24542	2.06911	1.30752	0.772546	0.441783	0.158455	0.0814285	-0.0127627	2.57286	1.57911	0.781218	0.388488	0.210518	0.158682	0.0152545	-0.0180514
	1.13667	3.24119	2.07493	1.30881	0.773601	0.444314	0.154509	0.0799893	-0.0152095	2.581	1.58134	0.778186	0.381459	0.20973	0.161963	0.0178062	-0.0210911
	1.14	3.24799	2.07578	1.3088	0.77382	0.440842	0.155238	0.0792697	-0.00849662	2.57939	1.58797	0.784996	0.38781	0.210585	0.160673	0.0196426	-0.0169453
	1.14333	3.25265	2.07672	1.31074	0.773504	0.441037	0.15518	0.0794105	-0.0127668	2.58564	1.58709	0.78163	0.38809	0.20713	0.160055	0.0139349	-0.0210778
	1.14667	3.25448	2.07533	1.31564	0.771895	0.443521	0.156252	0.0812756	-0.0158402	2.58245	1.59006	0.783937	0.387105	0.208634	0.158035	0.0187402	-0.0219845
	1.15	3.25196	2.08172	1.30911	0.776372	0.44224	0.153464	0.081283	-0.0120659	2.59104	1.58931	0.78761	0.39062	0.210642	0.159394	0.0148165	-0.0220755
	1.15333	3.26038	2.0829	1.31613	0.77339	0.443596	0.155362	0.080224	-0.0115431	2.59172	1.58912	0.785215	0.386818	0.204114	0.160425	0.01767	-0.0195229
	1.15667	3.26491	2.08666	1.31851	0.773984	0.445459	0.154481	0.0786546	-0.0124461	2.59514	1.59304	0.78724	0.389166	0.209966	0.163312	0.0209671	-0.0200241
	1.16	3.26685	2.09072	1.31529	0.776483	0.444808	0.156687	0.0834217	-0.0116642	2.59723	1.59577	0.784882	0.392313	0.211315	0.158445	0.0159668	-0.0168547
	1.16333	3.26973	2.09314	1.31733	0.774475	0.445186	0.157144	0.0795199	-0.0109615	2.6016	1.59842	0.784574	0.38288	0.207505	0.161036	0.0151944	-0.022996
	1.16667	3.27088	2.08952	1.31624	0.780466	0.442083	0.151909	0.0821264	-0.0141424	2.60609	1.59688	0.79103	0.385332	0.209342	0.162276	0.0181108	-0.0240818
	1.17	3.27837	2.09224	1.31777	0.77841	0.446117	0.146955	0.0804775	-0.0105188	2.60991	1.59995	0.789006	0.38731	0.20888	0.162851	0.0188996	-0.0206003
	1.17333	3.27632	2.09412	1.32038	0.778812	0.448904	0.151036	0.082445	-0.0139873	2.60781	1.60555	0.786072	0.388801	0.212162	0.161032	0.0179762	-0.019566
	1.17667	3.28178	2.09736	1.32249	0.779709	0.442342	0.155819	0.0806008	-0.00875316	2.6085	1.60654	0.790806	0.387396	0.210841	0.164615	0.0169082	-0.0177193
	1.18	3.28617	2.09949	1.3247	0.774206	0.450393	0.153145	0.0810962	-0.0107677	2.61711	1.61156	0.79154	0.385653	0.211395	0.163052	0.0138091	-0.0176082
	1.18333	3.28674	2.10209	1.32337	0.782897	0.447261	0.152683	0.0811454	-0.0140414	2.62178	1.60987	0.794589	0.387072	0.206428	0.163454	0.0142215	-0.0187673
	1.18667	3.29109	2.10645	1.32604	0.782032	0.446898	0.15486	0.0766101	-0.0146197	2.62176	1.61454	0.798156	0.389303	0.209236	0.163381	0.016384	-0.0195329
	1.19	3.29159	2.11027	1.3254	0.784134	0.446121	0.158284	0.0797689	-0.0125152	2.62735	1.61541	0.793141	0.390429	0.209658	0.16383	0.0140918	-0.0192059
	1.19333	3.2979	2.11016	1.32743	0.778233	0.447967	0.157854	0.0781523	-0.0139713	2.62829	1.62284	0.79882	0.389498	0.213883	0.164044	0.0142577	-0.0186247
	1.19667	3.29935	2.11312	1.33048	0.781567	0.451157	0.155935	0.080922	-0.0120351	2.62894	1.62386	0.796467	0.389658	0.211753	0.163877	0.0191588	-0.0247736
	1.2	3.30395	2.1131	1.33119	0.780742	0.444254	0.155519	0.078437	-0.0150162	2.63273	1.62481	0.801194	0.390978	0.211678	0.161631	0.0179846	-0.0173915
	1.20333	3.30526	2.11442	1.32917	0.780162	0.448337	0.155539	0.0790387	-0.0142604	2.63833	1.62523	0.797948	0.392364	0.2095	0.16339	0.0190654	-0.0171892
	1.20667	3.30642	2.11829	1.32833	0.780048	0.446248	0.157448	0.076729	-0.0115975	2.64037	1.62394	0.800653	0.391875	0.208022	0.159559	0.0162239	-0.0216301
	1.21	3.30841	2.12467	1.33029	0.783287	0.444667	0.153212	0.0840226	-0.0110914	2.64331	1.6304	0.798367	0.390023	0.213067	0.165531	0.0160134	-0.0187794
	1.21333	3.31639	2.12755	1.33479	0.784632	0.446208	0.154928	0.0820482	-0.0117742	2.6422	1.63226	0.799995	0.388479	0.210079	0.163579	0.0121182	-0.0186408
	1.21667	3.32008	2.12379	1.33693	0.782205	0.450624	0.153905	0.0809644	-0.0121649	2.64442	1.63119	0.80516	0.386935	0.211456	0.15972	0.0159794	-0.0198012
	1.22	3.31935	2.12407	1.33347	0.78485	0.448898	0.153555	0.0792454	-0.0170668	2.6497	1.63813	0.807024	0.392236	0.214185	0.162571	0.0207762	-0.0204188
	1.22333	3.32532	2.13053	1.33879	0.787413	0.448269	0.156098	0.0809665	-0.0137788	2.64895	1.6363	0.801897	0.388345	0.202641	0.163585	0.0156415	-0.0209233
	1.22667	3.32607	2.13181	1.33718	0.787451	0.452552	0.153498	0.0846618	-0.0154279	2.65718	1.6376	0.805118	0.392884	0.209545	0.166715	0.0167334	-0.0171896
	1.23	3.32859	2.13666	1.34189	0.785189	0.449807	0.152105	0.0841752	-0.0149815	2.65665	1.63779	0.805552	0.391715	0.210008	0.16242	0.0169218	-0.0160929
	1.23333	3.32843	2.13517	1.34184	0.787504	0.447516	0.152941	0.0801389	-0.0150969	2.66069	1.64133	0.806246	0.389282	0.21227	0.16819	0.0186472	-0.0204
	1.23667	3.33194	2.14131	1.34348	0.790204	0.448887	0.155621	0.0826715	-0.0119915	2.66768	1.65099	0.806044	0.391768	0.210128	0.163671	0.0205886	-0.0225863
	1.24	3.33745	2.1361	1.34612	0.79138	0.452004	0.155589	0.0771123	-0.011732	2.66986	1.65268	0.806914	0.39339	0.210481	0.166578	0.0129213	-0.0205886
	1.24333	3.34191	2.14451	1.34433	0.785171	0.446554	0.152614	0.0751408	-0.0134713	2.67058	1.65415	0.807441	0.393157	0.216025	0.159893	0.0192025	-0.0188263
	1.24667	3.34213	2.14828	1.34659	0.792187	0.450785	0.155119	0.0844116	-0.0115552	2.67086	1.64883	0.807741	0.391811	0.210291	0.158259	0.0152414	-0.0231232
	1.25	3.34398	2.1464	1.34874	0.790781	0.450471	0.155872	0.0813177	-0.0148967	2.67659	1.65407	0.809446	0.395128	0.214729	0.161493	0.0138479	-0.0189807
	1.25333	3.3482	2.1438	1.34784	0.78947	0.44765	0.154566	0.0806258	-0.0126829	2.67755	1.65972	0.808999	0.394485	0.212949	0.157077	0.012343	-0.0232949
	1.25667	3.35472	2.1511	1.34905	0.795906	0.451556	0.155134	0.0829474	-0.0164398	2.68303	1.65806	0.813221	0.393873	0.210345	0.167044	0.0177606	-0.019639
	1.26	3.34981	2.15004	1.35369	0.792268	0.448224	0.159653	0.0859975	-0.0111588	2.68376	1.66312	0.816048	0.395283	0.213595	0.159953	0.0141423	-0.0208256
	1.26333	3.35509	2.16004	1.34444	0.790834	0.455617	0.156397	0.0820658	-0.0137038	2.68389	1.66036	0.814509	0.393077	0.210419	0.161779	0.0136778	-0.0167335
	1.26667	3.36045	2.15439	1.35047	0.793409	0.450523	0.155878	0.08023	-0.0158613	2.69032	1.66436	0.816955	0.391102	0.210232	0.164098	0.0168215	-0.0201541
	1.27	3.3658	2.16023	1.35488	0.794103	0.452013	0.154431	0.0848362	-0.0161162	2.6934	1.66605	0.81602	0.389704	0.210513	0.16266	0.0132591	-0.0209651
	1.27333	3.36305	2.15825	1.35237	0.796305	0.451495	0.152918	0.0865083	-0.0146693	2.69384	1.67056	0.813171	0.395446	0.207241	0.162953	0.0184963	-0.0189986
	1.27667	3.36786	2.16031	1.35419	0.794084	0.451982	0.15326	0.0802227	-0.0148866	2.70296	1.66924	0.819771	0.393129	0.212396	0.162899	0.0129637	-0.0170177
	1.28	3.37512	2.16303	1.35799	0.792509	0.456086	0.158037	0.0831079	-0.0134036	2.70126	1.6735	0.8225	0.395847	0.209592	0.165659	0.0173619	-0.0243472
	1.28333	3.37153	2.16652	1.35665	0.792274	0.451888	0.157167	0.082696	-0.0157853	2.70033	1.66971	0.818692	0.393298	0.216294	0.162159	0.0141078	-0.0216459
	1.28667	3.38093	2.16577	1.35618	0.794493	0.447746	0.154184	0.0826585	-0.0111997	2.7056	1.67675	0.819509	0.395265	0.214151	0.161784	0.0139034	-0.0205228
	1.29	3.38161	2.1678	1.35823	0.797511	0.453253	0.155699	0.0788374	-0.0135804	2.70736	1.67979	0.816896	0.397161	0.211679	0.160748	0.014002	-0.018755
	1.29333	3.37756	2.1741	1.36041	0.799817	0.452744	0.153892	0.0782716	-0.0161351	2.70981	1.68169	0.818845	0.391598	0.21227	0.160784	0.0202004	-0.0214419
	1.29667	3.388	2.17212	1.35897	0.796797	0.448011	0.15565	0.0835562	-0.0147676	2.7124	1.68442	0.820773	0.396197	0.212324	0.161592	0.0151546	-0.0211975
	1.3	3.39197	2.17227	1.36209	0.794696	0.451346	0.154267	0.0806609	-0.0158455	2.71402	1.68643	0.820924	0.388392	0.206975	0.16382	0.0129891	-0.0240893
	1.30333	3.38767	2.18173	1.37073	0.795408	0.451391	0.158141	0.0842479	-0.0150858	2.71763	1.68657	0.825871	0.394791	0.214391	0.161437	0.0169628	-0.0187736
	1.30667	3.39018	2.18575	1.36586	0.798936	0.452656	0.155883	0.0804202	-0.0133821	2.71541	1.68814	0.823133	0.395562	0.217127	0.163274	0.0154852	-0.0229449
	1.31	3.3984	2.18675	1.36557	0.79594	0.454243	0.158524	0.0812229	-0.0146451	2.72667	1.69164	0.827767	0.395921	0.210907	0.160734	0.0176258	-0.0220179
	1.31333	3.39771	2.18834	1.36937	0.799215	0.457068	0.159636	0.082751	-0.0160882	2.72274	1.6942	0.828008	0.394159	0.2155	0.160593	0.0138729	-0.0250997
	1.31667	3.3984	2.18629	1.36441	0.798007	0.455348	0.158291	0.0807066	-0.013798	2.72735	1.69084	0.825297	0.396407	0.210007	0.160536	0.0180732	-0.0233638
	1.32	3.40562	2.18665	1.36521	0.798711	0.450832	0.154219	0.0811686	-0.0164425	2.73138	1.70028	0.826875	0.397352	0.208581	0.162192	0.0152102	-0.0179979
	1.32333	3.4069	2.19148	1.37218	0.801399	0.452549	0.152142	0.0832457	-0.0159039	2.73351	1.6994	0.831642	0.396834	0.210528	0.168193	0.0161273	-0.0233124
	1.32667	3.4131	2.19182	1.37275	0.799465	0.455577	0.160206	0.082687	-0.0132999	2.73945	1.69778	0.830392	0.397783	0.210801	0.164227	0.0140199	-0.0219606
	1.33	3.41572	2.19254	1.37398	0.802753	0.45242	0.154876	0.0792968	-0.0155653	2.74189	1.70015	0.831435	0.399486	0.209228	0.164101	0.0147852	-0.0203551
	1.33333	3.41121	2.19726	1.37529	0.802938	0.45462	0.155136	0.0810873	-0.0128214	2.74194	1.70835	0.832872	0.39554	0.210419	0.162794	0.0179021	-0.0210459
	1.33667	3.41894	2.19299	1.37371	0.800816	0.456403	0.156537	0.0842571	-0.0190908	2.74561	1.71122	0.829726	0.396255	0.215222	0.167211	0.0161617	-0.0203272
	1.34	3.42484	2.20367	1.37659	0.801622	0.456011	0.154813	0.0777412	-0.0142045	2.74938	1.71636	0.835549	0.399117	0.214869	0.164576	0.0162263	-0.0201549
	1.34333	3.4275	2.20273	1.37973	0.804053	0.453698	0.158773	0.0835159	-0.0155964	2.74544	1.70802	0.835859	0.395701	0.211077	0.164405	0.0123969	-0.0252074
	1.34667	3.42479	2.20491	1.37941	0.805831	0.456484	0.156683	0.0832599	-0.015992	2.75025	1.71593	0.830795	0.403306	0.212428	0.161466	0.0157067	-0.0205832
	1.35	3.42978	2.2073	1.38086	0.803478	0.455689	0.15509	0.0781356	-0.0106592	2.75052	1.71622	0.835585	0.39838	0.211319	0.161615	0.0213884	-0.0190808
	1.35333	3.43282	2.20537	1.38252	0.805378	0.454477	0.15686	0.0810081	-0.0146911	2.75966	1.71607	0.832818	0.397107	0.213705	0.16134	0.0134323	-0.0181863
	1.35667	3.43184	2.20962	1.38429	0.804015	0.453266	0.155555	0.0815514	-0.0165635	2.75912	1.72013	0.839567	0.397317	0.215274	0.161584	0.0136465	-0.0234675
	1.36	3.43659	2.21517	1.3849	0.805884	0.455559	0.16097	0.083292	-0.0147477	2.76356	1.72545	0.84035	0.398945	0.211064	0.160223	0.0134817	-0.0221856
	1.36333	3.43601	2.21526	1.38484	0.80887	0.457867	0.158528	0.081499	-0.0191984	2.76627	1.72269	0.840301	0.395591	0.215035	0.16449	0.0148676	-0.0240502
	1.36667	3.44563	2.21796	1.38162	0.808828	0.457582	0.156618	0.0838871	-0.0135712	2.76483	1.72648	0.84145	0.398886	0.210679	0.163089	0.0163153	-0.0252647
	1.37	3.44742	2.21839	1.38535	0.808639	0.45547	0.155972	0.08203	-0.0134833	2.77294	1.73482	0.843684	0.400638	0.212859	0.161819	0.0117771	-0.0227404
	1.37333	3.44369	2.221	1.38523	0.809453	0.456887	0.158331	0.0836091	-0.0131819	2.77139	1.7298	0.839996	0.401095	0.214793	0.163081	0.0151637	-0.0221282
	1.37667	3.44947	2.22185	1.39047	0.81173	0.461586	0.161287	0.0827902	-0.0192991	2.7738	1.73015	0.840142	0.398764	0.211654	0.162263	0.0142709	-0.0239211
	1.38	3.45559	2.22963	1.39066	0.80813	0.460148	0.156175	0.0825693	-0.0161295	2.77761	1.73643	0.843772	0.400022	0.214744	0.159675	0.011943	-0.0232777
	1.38333	3.46027	2.22835	1.38856	0.810351	0.455114	0.159238	0.0855533	-0.0123665	2.77966	1.73587	0.842224	0.401994	0.212432	0.160636	0.0166329	-0.0238578
	1.38667	3.45859	2.23009	1.39523	0.807115	0.458351	0.158	0.0842178	-0.0174986	2.78333	1.73694	0.846019	0.4021	0.2093	0.165672	0.0158427	-0.0200904
	1.39	3.46186	2.22999	1.39461	0.809344	0.458146	0.151645	0.0816834	-0.0161706	2.78448	1.73782	0.847059	0.401287	0.217041	0.160516	0.0127817	-0.026544
	1.39333	3.46562	2.23439	1.39519	0.812115	0.463047	0.15502	0.0861683	-0.0167848	2.79009	1.74167	0.845736	0.400267	0.214597	0.163528	0.0139066	-0.0218078
	1.39667	3.46102	2.23439	1.39728	0.810387	0.458049	0.154901	0.0822241	-0.015427	2.78952	1.74426	0.845889	0.394555	0.212782	0.161729	0.0145542	-0.0247494
	1.4	3.47148	2.23348	1.39545	0.812348	0.457484	0.155544	0.0799868	-0.0125614	2.79127	1.7478	0.853556	0.40081	0.214549	0.162582	0.0155764	-0.0250231
	1.40333	3.46626	2.24046	1.3997	0.813687	0.456792	0.16	0.087179	-0.0142554	2.79813	1.74878	0.848649	0.400215	0.212573	0.16017	0.0163764	-0.0226817
	1.40667	3.47395	2.23919	1.39891	0.811433	0.457944	0.158781	0.0814487	-0.0172769	2.79916	1.74653	0.847351	0.399509	0.212697	0.164798	0.0123954	-0.0225126
	1.41	3.47475	2.24217	1.3965	0.815796	0.459126	0.159265	0.0832007	-0.0158348	2.79592	1.75521	0.852129	0.403624	0.209005	0.164819	0.0151302	-0.0246641
	1.41333	3.48171	2.24666	1.39989	0.814704	0.46243	0.158869	0.0799787	-0.0164635	2.80044	1.75134	0.852864	0.401982	0.211923	0.163768	0.0153365	-0.0237977
	1.41667	3.48234	2.25017	1.4013	0.815891	0.464264	0.155765	0.0838576	-0.0153484	2.80311	1.76388	0.852381	0.399272	0.20993	0.166203	0.0156289	-0.023185
	1.42	3.48481	2.24615	1.4012	0.812787	0.463154	0.158013	0.085407	-0.0146088	2.80873	1.75954	0.853927	0.402545	0.214712	0.163401	0.0105497	-0.0251053
	1.42333	3.48724	2.24854	1.39999	0.814635	0.457422	0.158689	0.0817654	-0.00833593	2.81085	1.76343	0.853926	0.406419	0.216641	0.166215	0.0120221	-0.0211756
	1.42667	3.49139	2.25289	1.40904	0.816355	0.456368	0.156449	0.0841418	-0.0196853	2.81465	1.76041	0.851672	0.398761	0.214199	0.16523	0.0125166	-0.0217446
	1.43	3.48802	2.25547	1.40983	0.816054	0.459535	0.156588	0.0838659	-0.0153311	2.8121	1.76731	0.856064	0.401678	0.2169	0.164362	0.0134795	-0.0208927
	1.43333	3.49459	2.25965	1.40277	0.816022	0.461988	0.156905	0.0813515	-0.0170874	2.8133	1.76696	0.860723	0.404169	0.213341	0.16289	0.0127935	-0.024761
	1.43667	3.49998	2.26094	1.40657	0.816718	0.464198	0.154079	0.080441	-0.0186206	2.81693	1.76874	0.855852	0.401623	0.209625	0.161118	0.0151658	-0.0244975
	1.44	3.49978	2.26003	1.40655	0.820395	0.461009	0.158531	0.0812938	-0.0134526	2.82596	1.76961	0.859427	0.403609	0.210387	0.160931	0.0115424	-0.0237519
	1.44333	3.50269	2.26214	1.41084	0.816741	0.462008	0.158626	0.0834151	-0.013885	2.82494	1.77272	0.855829	0.400995	0.209664	0.16133	0.0181439	-0.0196867
	1.44667	3.50799	2.26445	1.41129	0.818655	0.461097	0.158199	0.0817079	-0.0148778	2.82863	1.77378	0.864014	0.402907	0.214704	0.159972	0.0122799	-0.0234241
	1.45	3.509	2.26459	1.41306	0.81957	0.462687	0.156295	0.0834583	-0.013904	2.82852	1.77477	0.859108	0.406179	0.215371	0.165409	0.0145254	-0.023035
	1.45333	3.50603	2.26604	1.40672	0.818244	0.461763	0.159533	0.0825266	-0.011024	2.83279	1.77868	0.859594	0.404615	0.212946	0.162871	0.0117995	-0.0253267
	1.45667	3.51324	2.27131	1.41507	0.82197	0.461127	0.156209	0.0858451	-0.0138349	2.83371	1.78165	0.859527	0.400665	0.211035	0.162582	0.0101726	-0.0222962
	1.46	3.51467	2.27141	1.41842	0.81948	0.462437	0.156018	0.0842899	-0.0154877	2.84064	1.78698	0.866465	0.405676	0.214059	0.162691	0.0162741	-0.0225252
	1.46333	3.51524	2.27682	1.42189	0.818231	0.460443	0.156869	0.0819024	-0.0161097	2.84178	1.78388	0.861979	0.403868	0.212279	0.161955	0.0115426	-0.0259558
	1.46667	3.52012	2.2747	1.41839	0.82597	0.462982	0.157594	0.0828401	-0.018227	2.83981	1.78312	0.868545	0.407203	0.212115	0.160311	0.0148116	-0.0235059
	1.47	3.5204	2.27787	1.42139	0.823914	0.464598	0.154303	0.0872086	-0.0143068	2.8433	1.79174	0.86505	0.408474	0.209811	0.161152	0.0138249	-0.0230172
	1.47333	3.52439	2.27811	1.42319	0.824853	0.461863	0.157574	0.0835233	-0.0211121	2.84264	1.79272	0.867045	0.405193	0.211353	0.16166	0.0121038	-0.0218335
	1.47667	3.52841	2.28326	1.42086	0.823105	0.463552	0.159369	0.0819242	-0.014183	2.84892	1.79062	0.868736	0.407995	0.211992	0.163899	0.0168711	-0.026739
	1.48	3.52387	2.28286	1.42327	0.822206	0.46598	0.157095	0.0791447	-0.015618	2.84726	1.79624	0.870434	0.403439	0.212309	0.157382	0.0148721	-0.0253781
	1.48333	3.52941	2.28612	1.42217	0.823496	0.46635	0.155697	0.082168	-0.0165204	2.8533	1.79203	0.866674	0.405948	0.214369	0.160024	0.013884	-0.0202937
	1.48667	3.53086	2.29222	1.42146	0.825268	0.460319	0.15915	0.0832349	-0.0162778	2.85565	1.79615	0.868509	0.40777	0.207771	0.163214	0.0131083	-0.0248813
	1.49	3.5361	2.29083	1.4262	0.825335	0.463273	0.159274	0.083731	-0.0252486	2.85359	1.79933	0.872621	0.407192	0.211822	0.159102	0.0155138	-0.024279
	1.49333	3.53875	2.28953	1.43181	0.824227	0.465312	0.160075	0.0834163	-0.0181601	2.85508	1.80171	0.877789	0.409279	0.216123	0.1647	0.0148614	-0.0254351
	1.49667	3.54252	2.29277	1.42791	0.828659	0.465366	0.156836	0.0796138	-0.0165356	2.86102	1.80723	0.878201	0.406752	0.215726	0.162157	0.0134363	-0.023339
	1.5	3.54133	2.2913	1.43006	0.82741	0.462553	0.159434	0.0830535	-0.0198683	2.86281	1.80315	0.875311	0.405223	0.213939	0.160858	0.0125696	-0.0225129
	1.50333	3.54761	2.29549	1.43008	0.827128	0.465123	0.156175	0.0842777	-0.0157441	2.86174	1.81059	0.871481	0.410543	0.214677	0.16299	0.0129004	-0.0221089
	1.50667	3.54468	2.29623	1.42701	0.825278	0.463192	0.154131	0.0847254	-0.0179469	2.8697	1.80894	0.874946	0.412003	0.209763	0.163877	0.0187124	-0.0226966
	1.51	3.54946	2.30257	1.42807	0.820707	0.46921	0.154228	0.0807762	-0.0218326	2.87094	1.81213	0.878686	0.40956	0.21401	0.162235	0.0177093	-0.0202206
	1.51333	3.55018	2.30712	1.42928	0.829652	0.466036	0.154768	0.0900907	-0.017159	2.87415	1.81546	0.876748	0.405481	0.212783	0.162072	0.0144872	-0.0237765
	1.51667	3.55623	2.30431	1.43639	0.830577	0.463188	0.156059	0.0822617	-0.0169784	2.87712	1.81475	0.876514	0.406277	0.210198	0.164849	0.0166477	-0.022842
	1.52	3.55717	2.30869	1.43598	0.830549	0.465732	0.155163	0.0817396	-0.0133649	2.8799	1.81569	0.8787	0.408146	0.212664	0.160997	0.0125609	-0.0229072
	1.52333	3.55726	2.306	1.43759	0.832005	0.466407	0.157774	0.0863089	-0.0165608	2.88183	1.82016	0.877114	0.404687	0.211879	0.16552	0.0152377	-0.0250061
	1.52667	3.56585	2.30881	1.43553	0.834184	0.469709	0.15645	0.0861095	-0.0142196	2.88327	1.81687	0.880468	0.408327	0.212256	0.161838	0.0115289	-0.0207866
	1.53	3.56099	2.30913	1.43805	0.828495	0.466197	0.155845	0.0849183	-0.0157393	2.88228	1.8219	0.877041	0.409115	0.212547	0.159686	0.0145571	-0.0248128
	1.53333	3.56856	2.31151	1.44232	0.830928	0.463484	0.160776	0.0876214	-0.0191922	2.88593	1.82679	0.883505	0.412994	0.21492	0.165022	0.0147964	-0.0262411
	1.53667	3.57036	2.31737	1.43998	0.830541	0.46666	0.15758	0.0839617	-0.0153296	2.88656	1.8258	0.882305	0.409838	0.213492	0.163628	0.0133723	-0.0229995
	1.54	3.57019	2.32077	1.43533	0.832783	0.467757	0.153888	0.0845059	-0.0166182	2.89145	1.82841	0.877348	0.405709	0.214903	0.158203	0.0116544	-0.0268642
	1.54333	3.57207	2.31873	1.44177	0.834944	0.464815	0.153322	0.0820812	-0.0162356	2.88906	1.83276	0.885145	0.412553	0.214942	0.160365	0.013113	-0.0182826
	1.54667	3.57975	2.32127	1.44253	0.832536	0.464653	0.158098	0.0835642	-0.016556	2.89309	1.82998	0.881476	0.40707	0.21059	0.160686	0.0126665	-0.0269764
	1.55	3.57553	2.32373	1.44264	0.836257	0.465098	0.157696	0.0826353	-0.0147056	2.898	1.82833	0.88845	0.41212	0.214428	0.165513	0.0139685	-0.0256898
	1.55333	3.57801	2.32674	1.44542	0.836248	0.464631	0.157109	0.0886228	-0.0181185	2.90054	1.83103	0.887067	0.410931	0.213009	0.163486	0.0122974	-0.0244818
	1.55667	3.58484	2.32309	1.44334	0.832801	0.467894	0.153237	0.0825809	-0.0149753	2.9035	1.83665	0.886763	0.407828	0.217615	0.163409	0.0144377	-0.0251486
	1.56	3.58997	2.33175	1.44695	0.835822	0.467728	0.155902	0.0847841	-0.0171242	2.90218	1.84058	0.88641	0.410204	0.211399	0.163227	0.0157431	-0.0241609
	1.56333	3.58912	2.33369	1.45009	0.836471	0.470413	0.156384	0.0871101	-0.0163612	2.90721	1.84098	0.891112	0.407589	0.216039	0.163019	0.0113598	-0.0257458
	1.56667	3.58512	2.33167	1.44979	0.835301	0.46718	0.157635	0.0817491	-0.0190537	2.91053	1.84151	0.886931	0.409529	0.212272	0.16273	0.0141715	-0.0246537
	1.57	3.59	2.33317	1.44953	0.834844	0.46741	0.157608	0.0827957	-0.015273	2.90577	1.84859	0.886952	0.414567	0.215975	0.16385	0.0124713	-0.0224797
	1.57333	3.59337	2.33702	1.45516	0.842837	0.464907	0.157384	0.085623	-0.0184059	2.91417	1.84842	0.89178	0.409096	0.21058	0.159686	0.0115086	-0.0269237
	1.57667	3.59731	2.34376	1.45356	0.837538	0.473954	0.157176	0.0874336	-0.0200019	2.91972	1.8488	0.893314	0.411521	0.211968	0.162266	0.00912297	-0.0262118
	1.58	3.59901	2.34391	1.45684	0.841951	0.469732	0.15852	0.0827259	-0.0211489	2.91554	1.85583	0.892668	0.405893	0.215832	0.160776	0.0171012	-0.0239056
	1.58333	3.60589	2.34737	1.45576	0.83638	0.471247	0.156683	0.0834178	-0.0180489	2.92042	1.85344	0.891888	0.410923	0.211539	0.161049	0.0101832	-0.0288978
	1.58667	3.60602	2.34609	1.46012	0.840258	0.466417	0.153462	0.0808272	-0.0180925	2.91864	1.85712	0.890816	0.408931	0.216473	0.162098	0.0147284	-0.0239486
	1.59	3.60689	2.34249	1.46323	0.841854	0.468501	0.1584	0.0834051	-0.0162972	2.92259	1.85847	0.893111	0.411389	0.21439	0.163943	0.0132357	-0.0204103
	1.59333	3.60839	2.34815	1.4579	0.842101	0.46713	0.15292	0.0866622	-0.0171659	2.92445	1.86012	0.895303	0.409004	0.213738	0.160029	0.0143741	-0.025529
	1.59667	3.61243	2.34654	1.46057	0.840775	0.474149	0.155498	0.0851728	-0.0232643	2.92786	1.8577	0.899989	0.409349	0.213115	0.164853	0.0104104	-0.0243702
	1.6	3.61383	2.35315	1.46049	0.840187	0.466855	0.158206	0.0813861	-0.0167383	2.92925	1.86427	0.898236	0.413673	0.216752	0.161983	0.012753	-0.0244662
	1.60333	3.62078	2.35426	1.46512	0.837405	0.466675	0.155309	0.082371	-0.0153562	2.935	1.86721	0.901865	0.413233	0.216601	0.164211	0.014424	-0.0251259
	1.60667	3.61999	2.35429	1.46298	0.838386	0.474487	0.159554	0.0837706	-0.0170895	2.93318	1.8657	0.895912	0.41197	0.214415	0.166427	0.00985527	-0.0252176
	1.61	3.62359	2.35751	1.46407	0.840985	0.467213	0.156538	0.0812036	-0.01834	2.93585	1.87319	0.900645	0.411035	0.214655	0.165605	0.00692547	-0.0270924
	1.61333	3.62713	2.36088	1.46243	0.842332	0.471222	0.161916	0.081982	-0.0170614	2.93699	1.87183	0.904294	0.408818	0.212823	0.161709	0.0138942	-0.025555
	1.61667	3.62726	2.36365	1.46888	0.843287	0.472894	0.15833	0.0845066	-0.0216033	2.93792	1.87105	0.903284	0.411429	0.211272	0.164717	0.0120106	-0.0250212
	1.62	3.62775	2.36307	1.46753	0.842273	0.472353	0.159912	0.0813486	-0.0192666	2.9439	1.87333	0.907238	0.412693	0.214702	0.162571	0.0113828	-0.0287387
	1.62333	3.63112	2.36301	1.47195	0.845502	0.472683	0.157115	0.0820199	-0.0190423	2.94392	1.87354	0.904507	0.411669	0.210422	0.162135	0.0104557	-0.0248073
	1.62667	3.63268	2.36668	1.47079	0.842195	0.468998	0.15278	0.0839063	-0.0188558	2.94473	1.87813	0.905357	0.415753	0.210834	0.16029	0.0156915	-0.0257452
	1.63	3.63273	2.36861	1.46748	0.84205	0.470963	0.159754	0.0816736	-0.0166197	2.94745	1.87828	0.906308	0.414064	0.215269	0.163563	0.0131365	-0.022853
	1.63333	3.63878	2.37367	1.46507	0.84765	0.46961	0.154243	0.0840515	-0.0174829	2.94505	1.88255	0.903015	0.410982	0.213716	0.161491	0.0146701	-0.0260113
	1.63667	3.6397	2.36429	1.46947	0.844876	0.472056	0.158135	0.085962	-0.0225388	2.95193	1.88357	0.905442	0.413432	0.215218	0.161786	0.012116	-0.0248544
	1.64	3.63871	2.37517	1.47145	0.842929	0.470279	0.159178	0.0833522	-0.0192117	2.95582	1.88427	0.907662	0.416638	0.212749	0.162555	0.0184412	-0.0272247
	1.64333	3.64293	2.3778	1.47322	0.849285	0.471779	0.155444	0.0882131	-0.0154117	2.96299	1.88638	0.907403	0.414515	0.211574	0.163603	0.0151628	-0.023766
	1.64667	3.64635	2.37325	1.47391	0.843322	0.469679	0.153032	0.0859494	-0.0163301	2.9624	1.88894	0.910366	0.413857	0.214373	0.160343	0.0074153	-0.0238641
	1.65	3.64702	2.3738	1.47648	0.850439	0.472675	0.157645	0.0824526	-0.0164779	2.96166	1.88694	0.907698	0.414978	0.212206	0.159682	0.0199606	-0.022512
	1.65333	3.64869	2.38164	1.4736	0.846883	0.470176	0.156237	0.0836249	-0.0187595	2.9634	1.89267	0.913272	0.415065	0.212131	0.164106	0.0119551	-0.0254941
	1.65667	3.65175	2.38123	1.47921	0.849774	0.47239	0.160136	0.0856243	-0.0221997	2.96509	1.88939	0.909989	0.414178	0.208083	0.161113	0.0138185	-0.0289573
	1.66	3.65176	2.38269	1.48149	0.846196	0.473289	0.162179	0.0831595	-0.0191693	2.96702	1.90096	0.911095	0.414569	0.211577	0.160502	0.0133646	-0.0267874
	1.66333	3.6544	2.38764	1.47845	0.845643	0.471107	0.155617	0.0843156	-0.0224819	2.97426	1.89444	0.911245	0.415686	0.218134	0.164087	0.0150515	-0.0230598
	1.66667	3.65869	2.39022	1.48148	0.852313	0.477248	0.159989	0.0883506	-0.0208356	2.973	1.90068	0.915032	0.418813	0.210779	0.162869	0.0143195	-0.0250182
	1.67	3.65916	2.38909	1.48136	0.849588	0.475976	0.15545	0.0858854	-0.0180411	2.97026	1.90119	0.915603	0.417173	0.212314	0.161284	0.0138965	-0.0269734
	1.67333	3.66131	2.39539	1.48408	0.850959	0.469124	0.16059	0.0853628	-0.016221	2.97204	1.90196	0.91756	0.416755	0.216682	0.164539	0.00965584	-0.0237683
	1.67667	3.66641	2.39217	1.48565	0.852066	0.473051	0.159678	0.0817842	-0.0180498	2.97702	1.90546	0.910524	0.418118	0.217766	0.163779	0.0132232	-0.0246665
	1.68	3.66528	2.39812	1.48774	0.847041	0.470388	0.160169	0.0824832	-0.018201	2.97999	1.90698	0.920715	0.417193	0.213366	0.164388	0.00960112	-0.0259965
	1.68333	3.6697	2.39906	1.48668	0.852845	0.475684	0.159855	0.0820281	-0.0142227	2.97996	1.90476	0.916146	0.420904	0.21646	0.162114	0.0112355	-0.0260949
	1.68667	3.67214	2.39753	1.48851	0.854811	0.475009	0.158426	0.0856082	-0.0157219	2.97775	1.90873	0.914983	0.418936	0.212654	0.167337	0.0143191	-0.0269126
	1.69	3.66942	2.40474	1.49035	0.848848	0.473932	0.158481	0.0844465	-0.0206919	2.98347	1.91047	0.91771	0.419376	0.215532	0.165122	0.0101192	-0.0261095
	1.69333	3.67804	2.40545	1.49148	0.850177	0.474842	0.156115	0.0832844	-0.0204338	2.98492	1.91203	0.921069	0.417156	0.213929	0.166727	0.0122018	-0.0263857
	1.69667	3.67267	2.40352	1.48998	0.850525	0.472004	0.159612	0.0827914	-0.0212512	2.98716	1.91263	0.922606	0.418166	0.214927	0.160626	0.00880993	-0.0269342
	1.7	3.6754	2.40441	1.4947	0.852659	0.473099	0.157068	0.0834145	-0.0201711	2.99433	1.92182	0.917937	0.419359	0.215858	0.163972	0.0146155	-0.0309928
	1.70333	3.68104	2.40931	1.49348	0.855553	0.471019	0.154706	0.0863588	-0.0209544	2.99039	1.91742	0.921839	0.418945	0.21685	0.162855	0.0107534	-0.0263619
	1.70667	3.68261	2.40854	1.49198	0.855579	0.476387	0.161556	0.0824916	-0.0220408	2.9958	1.91932	0.922036	0.416973	0.21281	0.163338	0.0129984	-0.0273959
	1.71	3.68432	2.41574	1.50063	0.854988	0.475169	0.159254	0.0847485	-0.0215138	2.99587	1.92036	0.919871	0.417635	0.214422	0.164441	0.015437	-0.0240606
	1.71333	3.68818	2.41176	1.49395	0.856725	0.472784	0.16048	0.0841336	-0.0169085	2.99656	1.92208	0.92388	0.418399	0.214411	0.161766	0.0126389	-0.0278564
	1.71667	3.69233	2.41421	1.49696	0.856232	0.476748	0.156726	0.0865618	-0.0185709	3.00341	1.9271	0.926011	0.416206	0.215892	0.160107	0.0107034	-0.0272927
	1.72	3.69559	2.41386	1.49746	0.857287	0.472279	0.159118	0.0889838	-0.0187573	3.0014	1.93232	0.927266	0.414952	0.21427	0.165733	0.00456035	-0.0287102
	1.72333	3.69548	2.41979	1.50103	0.854666	0.474148	0.157742	0.0851645	-0.0213059	3.00558	1.92983	0.925567	0.418708	0.217982	0.162946	0.011396	-0.0272718
	1.72667	3.69809	2.41858	1.50075	0.855009	0.475968	0.154358	0.0896501	-0.0194074	3.00425	1.93056	0.926497	0.416583	0.220087	0.162453	0.0092535	-0.0277012
	1.73	3.70079	2.42574	1.50018	0.855156	0.480412	0.157215	0.0881444	-0.0227289	3.0076	1.93169	0.926446	0.418191	0.213353	0.162748	0.0144794	-0.0267203
	1.73333	3.69584	2.42379	1.50178	0.858147	0.471877	0.158702	0.0823515	-0.0199386	3.01213	1.93652	0.928522	0.422483	0.213196	0.161393	0.0134418	-0.0260199
	1.73667	3.69781	2.4276	1.50567	0.856879	0.478189	0.157907	0.085918	-0.0197092	3.01321	1.93489	0.928754	0.421674	0.219116	0.16544	0.0141738	-0.0247458
	1.74	3.7005	2.42843	1.50232	0.85828	0.475978	0.159883	0.0860187	-0.0201177	3.01578	1.93981	0.9297	0.422342	0.213078	0.163833	0.0103837	-0.0285776
	1.74333	3.70349	2.42859	1.50854	0.862131	0.476021	0.164265	0.0837046	-0.0201493	3.01632	1.94097	0.929069	0.419989	0.215502	0.164869	0.00855792	-0.0270502
	1.74667	3.70815	2.43014	1.50507	0.857628	0.474579	0.162393	0.0875491	-0.0195464	3.0195	1.94404	0.928421	0.418974	0.216979	0.164318	0.00899065	-0.0264359
	1.75	3.71057	2.43445	1.50948	0.857132	0.479828	0.155499	0.0876859	-0.0207742	3.01905	1.94736	0.935404	0.417024	0.21554	0.159497	0.0109761	-0.0245298
	1.75333	3.71461	2.43325	1.50784	0.856098	0.476533	0.159076	0.0850953	-0.0219295	3.02314	1.94577	0.931046	0.415498	0.215987	0.162258	0.0110269	-0.0276223
	1.75667	3.71227	2.43625	1.5078	0.864815	0.473327	0.158008	0.0849985	-0.0168184	3.02444	1.94717	0.931854	0.41546	0.215354	0.164065	0.0152394	-0.0253415
	1.76	3.71775	2.43782	1.51176	0.859654	0.478038	0.162814	0.0835216	-0.0173714	3.03146	1.94905	0.931154	0.420338	0.212256	0.165834	0.0164367	-0.0255976
	1.76333	3.71547	2.44052	1.50902	0.865654	0.479661	0.155895	0.0872664	-0.0211277	3.02677	1.94725	0.935809	0.419364	0.216956	0.159893	0.0150151	-0.0313778
	1.76667	3.71741	2.44346	1.50837	0.86085	0.4767	0.15737	0.0879113	-0.0218165	3.03053	1.95023	0.938404	0.424454	0.216048	0.162511	0.0119337	-0.028897
	1.77	3.72194	2.44603	1.51683	0.863396	0.476556	0.156883	0.0868453	-0.0180617	3.03111	1.95834	0.93929	0.420936	0.212776	0.166387	0.0108582	-0.0263637
	1.77333	3.7221	2.44377	1.51473	0.861898	0.476497	0.157405	0.0842091	-0.02261	3.03592	1.95649	0.937801	0.420529	0.218452	0.156691	0.0166502	-0.0314401
	1.77667	3.72894	2.449	1.52102	0.864551	0.473969	0.159364	0.0861518	-0.0235393	3.03749	1.96058	0.939559	0.41894	0.214745	0.164455	0.00918067	-0.0240554
	1.78	3.73223	2.45141	1.51144	0.866537	0.477889	0.157138	0.0853006	-0.0190085	3.0376	1.95986	0.938465	0.423253	0.216593	0.159785	0.0129548	-0.0303033
	1.78333	3.73394	2.44671	1.51812	0.864721	0.479023	0.158682	0.0875662	-0.0225574	3.04291	1.96052	0.940918	0.420347	0.215105	0.166806	0.0119692	-0.0303604
	1.78667	3.73216	2.45331	1.52103	0.866267	0.479894	0.157675	0.0858403	-0.0228204	3.04265	1.9647	0.94294	0.420197	0.218214	0.165899	0.00731886	-0.0277785
	1.79	3.73489	2.45641	1.52416	0.862926	0.478908	0.158175	0.0832919	-0.018707	3.04078	1.96698	0.941139	0.422234	0.217894	0.163579	0.0128137	-0.0257887
	1.79333	3.7376	2.45619	1.5227	0.863691	0.4764	0.159336	0.083872	-0.0187932	3.04811	1.96753	0.940185	0.421869	0.218214	0.160097	0.0103115	-0.0310732
	1.79667	3.73737	2.45549	1.52133	0.865463	0.479626	0.157469	0.0866328	-0.0227718	3.04744	1.96774	0.944997	0.422222	0.218031	0.16809	0.0114642	-0.0299469
	1.8	3.74116	2.45876	1.52087	0.861746	0.47904	0.16	0.0887928	-0.0207616	3.0469	1.96701	0.9449	0.425383	0.215425	0.159103	0.0117441	-0.0266089
	1.80333	3.74132	2.46033	1.5247	0.86709	0.481715	0.158872	0.0837647	-0.018893	3.04971	1.97579	0.941318	0.42651	0.211264	0.165819	0.0100783	-0.0274968
	1.80667	3.74591	2.4626	1.5254	0.868787	0.474003	0.15649	0.084223	-0.0165398	3.04924	1.9768	0.947151	0.423276	0.214313	0.162039	0.011842	-0.0286864
	1.81	3.74734	2.46295	1.52541	0.86658	0.481122	0.15498	0.0835714	-0.0175562	3.05467	1.97155	0.945094	0.423177	0.217709	0.160178	0.00627411	-0.0289658
	1.81333	3.74914	2.46599	1.53182	0.865019	0.479371	0.155386	0.0870482	-0.0238598	3.04983	1.97586	0.94612	0.423135	0.213594	0.162429	0.0110135	-0.0303925
	1.81667	3.74991	2.47122	1.529	0.868905	0.47837	0.158747	0.0846438	-0.020971	3.05603	1.97865	0.953666	0.429601	0.212431	0.16321	0.0121974	-0.029146
	1.82	3.74973	2.47037	1.5256	0.865863	0.481937	0.157758	0.0869572	-0.0187104	3.05738	1.98072	0.948046	0.426362	0.216843	0.164296	0.00874007	-0.0284942
	1.82333	3.75405	2.47121	1.52636	0.87035	0.478882	0.16342	0.0810191	-0.0241585	3.06315	1.97842	0.949328	0.422991	0.220832	0.160798	0.0121254	-0.0294026
	1.82667	3.75449	2.47543	1.53166	0.868985	0.481069	0.159158	0.0848619	-0.0243289	3.06185	1.98452	0.950659	0.427491	0.217055	0.163613	0.0142202	-0.0262437
	1.83	3.75569	2.47762	1.53351	0.866964	0.478334	0.156638	0.0844978	-0.021371	3.0658	1.98566	0.955083	0.424338	0.21475	0.162706	0.0107904	-0.0233047
	1.83333	3.76136	2.47908	1.5301	0.87382	0.477645	0.161501	0.0825955	-0.0182852	3.06754	1.98808	0.952659	0.426847	0.210448	0.161127	0.0141515	-0.0294053
	1.83667	3.76425	2.48009	1.53585	0.872127	0.483567	0.159628	0.0838994	-0.0211056	3.06624	1.9899	0.952193	0.42729	0.211399	0.165745	0.0105456	-0.0304657
	1.84	3.76701	2.47824	1.53753	0.87279	0.479317	0.159552	0.0855418	-0.022958	3.07341	1.99301	0.952911	0.42795	0.215384	0.163018	0.00770414	-0.0280336
	1.84333	3.76707	2.48288	1.53509	0.871165	0.482798	0.161473	0.0857074	-0.0206381	3.07309	1.99204	0.953598	0.424245	0.213665	0.162821	0.0113636	-0.0321065
	1.84667	3.76945	2.48479	1.53193	0.872308	0.482564	0.159743	0.0845831	-0.0188832	3.07227	1.99246	0.953436	0.422749	0.218344	0.161705	0.00860858	-0.0274732
	1.85	3.76945	2.48694	1.53956	0.869762	0.47988	0.158984	0.086432	-0.0225011	3.07346	1.99805	0.958229	0.422684	0.217595	0.163484	0.0129973	-0.0323246
	1.85333	3.76554	2.48793	1.53746	0.874792	0.481306	0.156842	0.0865937	-0.0201921	3.08341	1.99265	0.957835	0.425124	0.216373	0.161069	0.0124384	-0.025044
	1.85667	3.77717	2.49035	1.54134	0.872376	0.479307	0.162553	0.0840691	-0.0250046	3.08526	1.99892	0.957711	0.428267	0.217416	0.166398	0.0146645	-0.0285216
	1.86	3.77303	2.48644	1.5415	0.876276	0.479711	0.16045	0.0869311	-0.0232856	3.07934	1.9964	0.957484	0.428274	0.217786	0.164089	0.0075717	-0.0282212
	1.86333	3.78036	2.49534	1.54239	0.875035	0.481836	0.156289	0.0850752	-0.0212253	3.08521	2.0059	0.956475	0.425727	0.216997	0.162512	0.0101339	-0.0292707
	1.86667	3.77905	2.4936	1.54489	0.871361	0.481342	0.160093	0.0818099	-0.025018	3.08319	2.00232	0.955819	0.425568	0.219943	0.160764	0.00934005	-0.0274429
	1.87	3.78411	2.50044	1.54459	0.875487	0.482679	0.160713	0.0855002	-0.02003	3.08646	2.00808	0.956225	0.422608	0.21843	0.162676	0.0103674	-0.0270104
	1.87333	3.78458	2.49771	1.54751	0.876025	0.48493	0.160308	0.0836023	-0.0208673	3.09122	2.0078	0.957681	0.428273	0.215308	0.162834	0.0131434	-0.0239601
	1.87667	3.78534	2.50013	1.54625	0.875454	0.483802	0.156278	0.0828267	-0.0218162	3.08545	2.01273	0.959672	0.425009	0.215468	0.163387	0.0111568	-0.0251633
	1.88	3.78689	2.50265	1.5441	0.87682	0.482675	0.156878	0.0877571	-0.0190946	3.09171	2.0137	0.959633	0.430179	0.214581	0.158343	0.00827539	-0.0316095
	1.88333	3.78792	2.50296	1.54961	0.877452	0.485363	0.161382	0.0865036	-0.0191245	3.08938	2.01202	0.965483	0.423829	0.217471	0.161631	0.0112734	-0.0283267
	1.88667	3.78936	2.50343	1.54999	0.873393	0.482032	0.157329	0.0865047	-0.022546	3.09486	2.01321	0.966655	0.421993	0.215689	0.164596	0.0128477	-0.0296137
	1.89	3.79616	2.50974	1.55391	0.88038	0.482546	0.158272	0.0852933	-0.0215682	3.09895	2.01715	0.963469	0.428608	0.213912	0.161034	0.0153424	-0.0295889
	1.89333	3.79308	2.50871	1.55101	0.87682	0.482782	0.159186	0.0830986	-0.023904	3.09957	2.01454	0.969315	0.427301	0.215452	0.160904	0.010901	-0.0274719
	1.89667	3.79595	2.50983	1.55062	0.880362	0.481135	0.159627	0.0835943	-0.0191235	3.10445	2.01922	0.963663	0.424716	0.212297	0.166462	0.00842202	-0.0308287
	1.9	3.79794	2.51545	1.55416	0.876409	0.486243	0.156715	0.0860175	-0.022521	3.1007	2.0242	0.967989	0.427358	0.212086	0.164873	0.0123872	-0.0293792
	1.90333	3.79963	2.51446	1.55462	0.880171	0.483401	0.15813	0.0862845	-0.0215795	3.1018	2.01969	0.968516	0.427872	0.219155	0.164482	0.00966108	-0.0290095
	1.90667	3.80087	2.51834	1.55214	0.880246	0.483925	0.157127	0.0808426	-0.0199921	3.10801	2.02199	0.969225	0.429029	0.208527	0.15845	0.00787318	-0.0295759
	1.91	3.80135	2.51827	1.55714	0.883424	0.486036	0.15831	0.0855104	-0.0244556	3.11348	2.02321	0.973614	0.432074	0.210915	0.164483	0.0155385	-0.03079
	1.91333	3.80486	2.51632	1.55887	0.883657	0.484766	0.157553	0.087674	-0.0163478	3.10726	2.02939	0.965524	0.430242	0.214439	0.159107	0.00907684	-0.0278011
	1.91667	3.80703	2.52315	1.55637	0.879919	0.484884	0.158629	0.0895821	-0.0219536	3.10782	2.03057	0.970964	0.428577	0.215554	0.164268	0.0113942	-0.0272671
	1.92	3.81344	2.52018	1.55979	0.882331	0.485029	0.161209	0.0841688	-0.0255177	3.11384	2.03146	0.971163	0.431047	0.218046	0.159743	0.00974286	-0.0340251
	1.92333	3.81314	2.52586	1.55872	0.88239	0.48319	0.158055	0.0854295	-0.0208502	3.11299	2.03075	0.973507	0.431986	0.217506	0.163612	0.00891769	-0.0241333
	1.92667	3.81278	2.5289	1.55999	0.884357	0.484908	0.157388	0.0870248	-0.0230903	3.11759	2.03036	0.973819	0.42739	0.213334	0.1619	0.0156429	-0.0306463
	1.93	3.81413	2.52702	1.56085	0.885575	0.484403	0.161505	0.0844568	-0.0175848	3.12029	2.04063	0.974305	0.427507	0.214253	0.160653	0.0127472	-0.0310152
	1.93333	3.81529	2.53023	1.56261	0.883114	0.485324	0.161662	0.0848474	-0.0190863	3.12268	2.0418	0.973614	0.429939	0.215656	0.163244	0.0114756	-0.0302642
	1.93667	3.81765	2.53228	1.56709	0.885825	0.485524	0.157123	0.0879333	-0.0215496	3.12029	2.04073	0.977984	0.431019	0.215163	0.165252	0.0109761	-0.0266382
	1.94	3.82184	2.53151	1.56461	0.883498	0.485263	0.159713	0.08472	-0.0224129	3.12023	2.04372	0.979949	0.433987	0.214511	0.162764	0.0085367	-0.0272009
	1.94333	3.81707	2.52998	1.56356	0.883287	0.485057	0.15631	0.0826053	-0.0204323	3.12762	2.04339	0.977629	0.427593	0.214654	0.162052	0.00781274	-0.0320911
	1.94667	3.82366	2.53512	1.56752	0.886636	0.490013	0.160395	0.0860604	-0.018416	3.12704	2.04574	0.978502	0.431921	0.21554	0.164321	0.0102756	-0.0261385
	1.95	3.82589	2.53523	1.5742	0.888676	0.483875	0.160352	0.0845132	-0.0236773	3.12774	2.04576	0.980867	0.432412	0.215663	0.157298	0.0133398	-0.0253226
	1.95333	3.82395	2.53784	1.56888	0.881584	0.483972	0.16186	0.0853754	-0.0255691	3.13296	2.04515	0.980702	0.430781	0.213922	0.165343	0.00626982	-0.0283983
	1.95667	3.82799	2.5404	1.57187	0.884588	0.485725	0.157212	0.0818741	-0.0204476	3.1334	2.04609	0.9796	0.435029	0.220859	0.162023	0.0076046	-0.0307649
	1.96	3.82912	2.54544	1.57078	0.889269	0.482665	0.160425	0.0889479	-0.0217404	3.13205	2.04901	0.982712	0.43183	0.216778	0.162087	0.0105481	-0.0283862
	1.96333	3.83367	2.54393	1.57019	0.89007	0.483878	0.159526	0.0832387	-0.0251567	3.13509	2.05438	0.98123	0.432544	0.212585	0.160798	0.00795269	-0.0324692
	1.96667	3.83273	2.54431	1.57035	0.88896	0.4874	0.160501	0.0829205	-0.0168269	3.13531	2.05739	0.984188	0.430791	0.213597	0.164247	0.0118775	-0.0298633
	1.97	3.83544	2.54701	1.57249	0.887249	0.482434	0.155616	0.0855955	-0.0207364	3.13842	2.05142	0.981568	0.434544	0.217568	0.162789	0.00802422	-0.0311375
	1.97333	3.83936	2.54821	1.57232	0.886147	0.489007	0.159333	0.0855615	-0.023918	3.13998	2.05487	0.984747	0.431339	0.214485	0.163681	0.0108707	-0.0312723
	1.97667	3.83785	2.54966	1.57343	0.888096	0.485265	0.159348	0.0861491	-0.01988	3.14281	2.05811	0.982942	0.429479	0.215844	0.163639	0.00681389	-0.033012
	1.98	3.84623	2.55154	1.57536	0.890049	0.484007	0.159108	0.0849455	-0.0213381	3.1452	2.06483	0.986808	0.43178	0.216651	0.160545	0.00441552	-0.0276204
	1.98333	3.84248	2.55352	1.58154	0.890313	0.48223	0.161911	0.085185	-0.021604	3.14335	2.06391	0.985959	0.434283	0.217098	0.163982	0.0125616	-0.0307389
	1.98667	3.84765	2.55705	1.57745	0.894871	0.48843	0.159569	0.0855931	-0.0217542	3.14529	2.06563	0.98934	0.431609	0.216604	0.160205	0.00939787	-0.0286662
	1.99	3.84994	2.55527	1.58036	0.889737	0.486857	0.159796	0.0860621	-0.0203094	3.14909	2.06273	0.989182	0.430201	0.218676	0.163246	0.00897372	-0.0325925
	1.99333	3.84925	2.55533	1.58216	0.889892	0.489863	0.164233	0.085414	-0.0210099	3.14796	2.0663	0.985626	0.432297	0.216961	0.162243	0.00960243	-0.0339337
	1.99667	3.84823	2.56056	1.58506	0.887927	0.489348	0.159907	0.0842634	-0.023207	3.1548	2.06873	0.992953	0.433132	0.216531	0.164413	0.00989628	-0.0286317
	2	3.85336	2.56317	1.58275	0.889709	0.489571	0.159235	0.0863609	-0.0229883	3.1497	2.06568	0.982991	0.433736	0.218737	0.162422	0.0081662	-0.0253328
	2.00333	3.85476	2.56214	1.58219	0.891387	0.488227	0.158832	0.0877198	-0.0215502	3.15494	2.07133	0.989702	0.438073	0.217513	0.160748	0.00733602	-0.030369
	2.00667	3.85238	2.56571	1.58417	0.893813	0.487948	0.162435	0.0800588	-0.025761	3.15642	2.07495	0.990427	0.435502	0.218853	0.164483	0.00832177	-0.0327335
	2.01	3.85758	2.56738	1.58534	0.897611	0.493188	0.158799	0.0862062	-0.0240483	3.1573	2.07706	0.986793	0.436463	0.219127	0.163719	0.00751782	-0.0318758
	2.01333	3.86322	2.57089	1.58602	0.892548	0.49034	0.159444	0.086824	-0.0269723	3.15913	2.07959	0.994188	0.436443	0.215857	0.164799	0.0106824	-0.0328815
	2.01667	3.859	2.56821	1.58486	0.896043	0.489527	0.156581	0.0829875	-0.0252595	3.15893	2.07955	0.992825	0.432175	0.215658	0.16037	0.00996781	-0.0298816
	2.02	3.86453	2.57145	1.58378	0.890961	0.488589	0.1583	0.0852362	-0.0246736	3.16538	2.07904	0.989848	0.437694	0.219265	0.161693	0.00928331	-0.030647
	2.02333	3.86518	2.57457	1.58815	0.891712	0.485799	0.158198	0.0888336	-0.0250816	3.17027	2.08068	0.995611	0.434914	0.212577	0.165819	0.00608135	-0.0345019
	2.02667	3.86721	2.57513	1.58978	0.894785	0.492351	0.159588	0.0842526	-0.025397	3.16619	2.07992	0.993563	0.432801	0.218201	0.161075	0.00677026	-0.0319294
	2.03	3.86231	2.57486	1.59066	0.89692	0.493494	0.157882	0.0828072	-0.0277029	3.16507	2.08398	0.994354	0.435398	0.216107	0.164024	0.00585771	-0.0273577
	2.03333	3.86719	2.57855	1.59502	0.891592	0.493723	0.160934	0.0832426	-0.0276079	3.16672	2.08561	0.996379	0.434014	0.214253	0.160141	0.00886739	-0.0316301
	2.03667	3.86982	2.57892	1.58935	0.897503	0.49029	0.162868	0.0815571	-0.0255666	3.16947	2.08492	0.995926	0.433112	0.214812	0.161935	0.0131562	-0.0269624
	2.04	3.8718	2.58436	1.59541	0.896589	0.485462	0.157682	0.0846375	-0.0199414	3.1738	2.09299	1.00123	0.440312	0.218745	0.16061	0.00907255	-0.0352482
	2.04333	3.87077	2.57861	1.5922	0.895277	0.490138	0.159115	0.0867584	-0.0240012	3.17457	2.09183	1.00265	0.43665	0.21635	0.163695	0.0107514	-0.0347176
	2.04667	3.87585	2.58527	1.59813	0.896716	0.487409	0.161958	0.0887918	-0.0220471	3.17687	2.09275	0.996366	0.432705	0.217166	0.161546	0.00682319	-0.0331583
	2.05	3.87713	2.58515	1.59946	0.896695	0.49122	0.158456	0.0869406	-0.0236565	3.17309	2.09774	0.998692	0.434533	0.215075	0.16398	0.0072999	-0.0327956
	2.05333	3.87937	2.59	1.60173	0.90045	0.488673	0.162742	0.0798612	-0.0187116	3.17818	2.09185	1.00265	0.43539	0.218652	0.16057	0.00701487	-0.0314761
	2.05667	3.87909	2.58868	1.59766	0.900498	0.488644	0.158891	0.0835229	-0.0222969	3.17863	2.10046	0.999878	0.434293	0.220534	0.16122	0.00840831	-0.0347393
	2.06	3.88743	2.59319	1.60119	0.898757	0.490254	0.157209	0.0834538	-0.0258772	3.17679	2.0982	0.999148	0.435785	0.218481	0.164192	0.0110428	-0.0316876
	2.06333	3.88571	2.59487	1.60287	0.899228	0.490267	0.163735	0.0850433	-0.0225412	3.18528	2.10055	1.00344	0.434412	0.215502	0.167285	0.00834024	-0.0286867
	2.06667	3.88559	2.59835	1.60313	0.901642	0.487795	0.158368	0.0847612	-0.025033	3.18894	2.1027	1.00391	0.436142	0.217386	0.160286	0.00683511	-0.0324485
	2.07	3.88655	2.59454	1.60872	0.900615	0.491189	0.161381	0.0814062	-0.0247054	3.18333	2.10324	1.00594	0.439014	0.218007	0.159233	0.00552786	-0.0278016
	2.07333	3.89483	2.59732	1.5979	0.90398	0.487595	0.15679	0.0854577	-0.0215515	3.19267	2.10955	1.00606	0.43997	0.216817	0.163753	0.00834203	-0.0293409
	2.07667	3.8895	2.59706	1.60448	0.904493	0.487783	0.158898	0.0839326	-0.0286538	3.19366	2.10485	1.00732	0.43738	0.215418	0.165128	0.0093422	-0.0326037
	2.08	3.88369	2.59813	1.60706	0.904344	0.492007	0.158872	0.0845644	-0.0274743	3.19426	2.10924	1.00415	0.439382	0.216507	0.162926	0.0023588	-0.0307078
	2.08333	3.88624	2.60082	1.60406	0.904425	0.488386	0.158905	0.0858946	-0.0234086	3.1947	2.11488	1.01055	0.43804	0.215371	0.162554	0.0047071	-0.0283298
	2.08667	3.89024	2.60692	1.60674	0.902714	0.494367	0.159146	0.083727	-0.0250982	3.19415	2.11199	1.00712	0.435136	0.218591	0.167153	0.00864733	-0.0314626
	2.09	3.8996	2.6071	1.60895	0.904668	0.490415	0.162696	0.0864333	-0.0261216	3.19875	2.11406	1.01163	0.434927	0.219645	0.158386	0.00903154	-0.030822
	2.09333	3.8979	2.60712	1.60846	0.904929	0.498256	0.160709	0.0812682	-0.0208673	3.19466	2.11421	1.00701	0.437472	0.218243	0.159265	0.00697887	-0.0292538
	2.09667	3.89803	2.6117	1.61145	0.906313	0.487439	0.163344	0.0832586	-0.0218515	3.19785	2.11675	1.00558	0.438095	0.216819	0.160629	0.00817335	-0.0321591
	2.1	3.9033	2.61618	1.61004	0.905684	0.488678	0.159573	0.0822674	-0.023156	3.19635	2.12066	1.0092	0.43837	0.215053	0.158697	0.00780416	-0.0312509
	2.10333	3.90934	2.6123	1.60951	0.908004	0.487415	0.158169	0.0858903	-0.0210386	3.20032	2.12292	1.01134	0.437452	0.21206	0.163169	0.0109611	-0.030791
	2.10667	3.90224	2.61741	1.6143	0.907102	0.495936	0.162032	0.0837526	-0.02449	3.20389	2.11885	1.01479	0.439017	0.215631	0.164165	0.00877786	-0.0317962
	2.11	3.90757	2.6186	1.61613	0.904662	0.488578	0.159836	0.0830128	-0.0252566	3.2085	2.12239	1.01512	0.434122	0.217536	0.161883	0.0056001	-0.0338766
	2.11333	3.90856	2.62064	1.61722	0.904632	0.491318	0.155621	0.0864696	-0.0259524	3.20992	2.12377	1.01641	0.442183	0.21824	0.163775	0.0108663	-0.0315371
[truncated: 16,765 more rows]

## Sheet: Repeat 3
		Response [nm]
[truncated: 17,401 more rows]

## Sheet: Non - specific binding
		Response [nm]
[truncated: 17,401 more rows]
