# Supplementary material for: Evolution towards simplicity in bacterial small heat shock protein system
Source: eLife. 2023 Dec 8;12:RP89813. doi: 10.7554/eLife.89813 (PMC10708888; doi:10.7554/eLife.89813)
Supplement: Figure 5—source data 4. [file elife-89813-fig5-data4.xlsx]

## Sheet: Arkusz1
			Response [nm]
		Time [min]	A0 ACD	A0 Q66H G109D ACD
		0	0	0
		0.003333	0.001094	-0.00116
		0.006667	-0.00056	0.002113
		0.01	-0.00122	0.00175
		0.013333	-3.7e-05	-0.00316
		0.016667	-0.00019	-0.00092
		0.02	0.000479	0.004057
		0.023333	-0.00049	-0.00168
		0.026667	-0.00306	0.00015
		0.03	0.004015	0.001452
		0.033333	0.002518	-0.00178
		0.036667	0.002602	-0.00076
		0.04	0.00267	0.003562
		0.043333	-0.00108	-4.3e-05
		0.046667	-0.00121	-0.00363
		0.05	0.002435	0.00283
		0.053333	0.001245	-0.00291
		0.056667	-0.00125	0.006007
		0.06	0.002849	-0.00307
		0.063333	-0.00029	0.004114
		0.066667	0.004065	-0.00039
		0.07	0.001194	0.001554
		0.073333	-0.00078	-0.0016
		0.076667	0.001108	-0.0017
		0.08	0.000722	0.004609
		0.083333	0.003651	0.001566
		0.086667	0.003534	0.001954
		0.09	0.003937	0.007808
		0.093333	-0.00078	0.004457
		0.096667	0.001685	0.001523
		0.1	0.003802	0.007208
		0.103333	0.00084	-0.00071
		0.106667	0.002104	-0.00059
		0.11	0.005649	0.005326
		0.113333	0.000472	0.00317
		0.116667	0.004712	-0.00205
		0.12	0.004388	0.001997
		0.123333	0.002858	0.000365
		0.126667	0.002974	-0.0002
		0.13	0.002854	0.002131
		0.133333	0.001459	0.001881
		0.136667	0.001867	0.00158
		0.14	0.004286	0.005326
		0.143333	0.003788	0.005512
		0.146667	-0.00193	0.005049
		0.15	0.004858	0.002216
		0.153333	-0.0013	0.002467
		0.156667	0.002685	0.006862
		0.16	0.004665	0.001667
		0.163333	-0.00119	0.003709
		0.166667	0.002926	0.002665
		0.17	0.001531	-0.00032
		0.173333	0.002595	0.00341
		0.176667	0.000783	0.005477
		0.18	-0.00034	0.003872
		0.183333	0.004632	0.002192
		0.186667	0.005924	0.003086
		0.19	-0.00095	-0.00143
		0.193333	0.004815	0.002819
		0.196667	0.000234	0.000466
		0.2	0.000192	0.00188
		0.203333	-0.00085	0.002867
		0.206667	0.000121	0.007963
		0.21	0.006912	0.007545
		0.213333	0.003516	0.005648
		0.216667	0.001403	0.001551
		0.22	0.000783	0.004636
		0.223333	0.001149	0.004268
		0.226667	0.003009	0.002499
		0.23	-0.00022	0.006504
		0.233333	0.000505	-0.00124
		0.236667	0.004932	0.002812
		0.24	0.001747	0.00512
		0.243333	0.002039	0.003086
		0.246667	0.003531	0.003149
		0.25	0.00288	0.006649
		0.253333	0.001359	0.000532
		0.256667	-0.00343	0.004236
		0.26	0.001487	0.003536
		0.263333	0.00322	0.003679
		0.266667	-0.00018	0.006722
		0.27	0.002462	0.006863
		0.273333	0.000215	0.002529
		0.276667	0.000825	0.009547
		0.28	0.002845	0.00482
		0.283333	0.004132	0.00483
		0.286667	0.000957	0.002074
		0.29	2.34e-05	0.005561
		0.293333	-0.00091	0.005334
		0.296667	0.000425	0.004406
		0.3	0.005358	0.003775
		0.303333	0.003303	0.003153
		0.306667	-0.00094	0.002109
		0.31	0.003498	0.006392
		0.313333	0.002044	0.004947
		0.316667	0.000185	0.00091
		0.32	0.002941	0.004635
		0.323333	0.000814	0.00235
		0.326667	0.000575	0.002991
		0.33	0.002339	0.000538
		0.333333	9.42e-05	0.005344
		0.336667	-0.00203	0.004991
		0.34	0.001408	0.008599
		0.343333	-0.00242	0.004998
		0.346667	-0.00091	0.004544
		0.35	0.00135	0.006362
		0.353333	0.002141	0.005622
		0.356667	0.002243	0.004993
		0.36	-0.00536	-0.00051
		0.363333	0.002471	0.007981
		0.366667	-0.00191	0.002166
		0.37	-0.00073	0.00418
		0.373333	-0.00029	0.005765
		0.376667	0.005638	0.003718
		0.38	0.003931	0.003239
		0.383333	-0.00156	0.004877
		0.386667	-0.00388	0.002696
		0.39	0.000691	0.004616
		0.393333	-0.00217	0.003098
		0.396667	-0.00104	0.009026
		0.4	1.69e-05	0.006298
		0.403333	-0.00321	0.005426
		0.406667	0.003066	0.005514
		0.41	-0.00079	0.004072
		0.413333	0.000931	0.005784
		0.416667	-0.00055	0.001068
		0.42	0.003823	0.007747
		0.423333	-0.00101	0.003987
		0.426667	0.00421	0.005977
		0.43	0.000825	0.003339
		0.433333	0.004212	0.000848
		0.436667	0.00161	0.00066
		0.44	0.002776	0.003164
		0.443333	0.001107	0.004401
		0.446667	-0.00241	0.012729
		0.45	0.001187	0.004868
		0.453333	0.001697	0.001426
		0.456667	0.0019	0.006628
		0.46	0.001151	0.004064
		0.463333	0.001486	-0.00098
		0.466667	0.000879	-0.00033
		0.47	0.002943	0.004862
		0.473333	0.004074	0.004082
		0.476667	-0.00091	0.006179
		0.48	0.00338	0.003453
		0.483333	-0.00233	0.006625
		0.486667	-0.00095	0.002247
		0.49	-0.00537	0.004228
		0.493333	0.001361	0.006348
		0.496667	0.005112	0.006457
		0.5	-0.0011	0.005816
		0.503333	0.002394	0.005181
		0.506667	0.001223	0.001704
		0.51	0.001944	0.005052
		0.513333	0.0034	0.003176
		0.516667	0.002047	0.001873
		0.52	0.003224	0.008164
		0.523333	-0.00027	0.007447
		0.526667	-0.00338	0.003709
		0.53	0.00139	0.00199
		0.533333	-0.00125	0.007471
		0.536667	-0.00281	0.001928
		0.54	-7.5e-05	0.007768
		0.543333	0.002987	0.009518
		0.546667	0.001215	0.004894
		0.55	0.002453	0.008561
		0.553333	-0.00299	0.003687
		0.556667	0.001829	0.006208
		0.56	-0.00086	0.00291
		0.563333	0.002089	0.005244
		0.566667	0.001314	0.005622
		0.57	0.000708	0.007802
		0.573333	0.000365	0.006382
		0.576667	-0.00499	0.001499
		0.58	-0.00165	0.008421
		0.583333	-0.00359	0.004192
		0.586667	-0.00278	0.006601
		0.59	0.005023	0.006093
		0.593333	0.002117	0.005463
		0.596667	0.000994	0.005514
		0.6	0.000674	0.010114
		0.603333	-0.00156	0.004582
		0.606667	-0.0046	0.004125
		0.61	-0.00165	0.00319
		0.613333	-0.00149	0.004578
		0.616667	0.000826	0.004151
		0.62	-0.00459	0.002402
		0.623333	-0.00236	0.006675
		0.626667	0.00246	0.004131
		0.63	-0.00093	0.005477
		0.633333	-0.0036	0.007608
		0.636667	0.001666	0.008864
		0.64	-0.00119	0.006907
		0.643333	-0.00197	-0.0005
		0.646667	-0.0031	0.010988
		0.65	-0.00245	0.002979
		0.653333	-0.00641	0.005299
		0.656667	-0.00194	0.002592
		0.66	-0.00558	0.004066
		0.663333	-0.00431	0.004899
		0.666667	0.000578	0.005713
		0.67	-0.00113	0.007668
		0.673333	-0.0029	0.00802
		0.676667	-0.00017	0.005929
		0.68	-0.00186	0.011198
		0.683333	-0.00085	0.006538
		0.686667	0.00126	0.006261
		0.69	-0.00456	0.007004
		0.693333	0.000173	0.004692
		0.696667	-0.00108	0.005435
		0.7	-0.00102	0.004516
		0.703333	0.003034	0.006253
		0.706667	-0.00152	0.005826
		0.71	-0.0045	0.002381
		0.713333	0.000325	0.003877
		0.716667	-3.3e-05	-0.00099
		0.72	-0.00063	0.006751
		0.723333	0.002494	0.004271
		0.726667	-0.0024	0.005233
		0.73	-0.00271	0.004333
		0.733333	-0.00066	0.005677
		0.736667	-0.00138	0.003378
		0.74	-0.00397	0.003757
		0.743333	-0.00195	0.006509
		0.746667	-0.00298	0.004994
		0.75	-0.00534	0.00211
		0.753333	-0.00187	0.005683
		0.756667	-0.00411	0.005039
		0.76	-0.00149	0.003355
		0.763333	-0.00156	0.005623
		0.766667	0.000191	0.005732
		0.77	-0.00394	0.003601
		0.773333	-0.00251	0.004154
		0.776667	-0.00496	0.008325
		0.78	3.17e-05	0.005779
		0.783333	-0.00101	0.014322
		0.786667	-0.00314	0.007483
		0.79	-0.00307	0.006567
		0.793333	0.000931	0.006032
		0.796667	0.000123	0.00324
		0.8	-0.00889	0.003962
		0.803333	-0.0034	0.007514
		0.806667	-0.00638	0.003634
		0.81	-0.00268	0.003001
		0.813333	-0.00335	0.003021
		0.816667	-0.00584	0.004531
		0.82	-0.00148	0.00478
		0.823333	-0.00739	0.006613
		0.826667	-0.0069	0.000333
		0.83	-3.1e-05	0.003744
		0.833333	-0.00407	0.006494
		0.836667	0.001867	0.00342
		0.84	-0.0029	0.00559
		0.843333	-0.00161	0.007212
		0.846667	-0.00416	0.00996
		0.85	0.000102	0.000921
		0.853333	-0.00194	0.002148
		0.856667	-0.00213	0.006845
		0.86	-0.00031	0.004692
		0.863333	-0.00881	0.006679
		0.866667	-0.00343	0.00698
		0.87	0.001441	0.002873
		0.873333	-0.00258	0.004447
		0.876667	-0.00259	0.001827
		0.88	-0.00107	0.005534
		0.883333	-0.00896	0.00911
		0.886667	-0.00588	0.007655
		0.89	-0.00642	0.004671
		0.893333	-0.00649	0.001993
		0.896667	-0.00319	0.005222
		0.9	-0.00054	0.004604
		0.903333	-0.00399	0.000199
		0.906667	-0.00348	0.004095
		0.91	-0.00834	-0.00142
		0.913333	-0.00673	0.003145
		0.916667	-0.00501	0.008795
		0.92	-0.00351	0.006995
		0.923333	-0.0036	0.002237
		0.926667	-0.00688	0.00779
		0.93	-0.00691	0.010942
		0.933333	-0.00366	0.003124
		0.936667	-0.00618	0.003963
		0.94	-0.0059	0.001424
		0.943333	-0.00792	0.005338
		0.946667	-0.00839	0.002159
		0.95	-0.00205	0.007993
		0.953333	-0.00363	0.001614
		0.956667	-0.00519	-0.0006
		0.96	-0.00368	0.002148
		0.963333	-0.00595	0.005101
		0.966667	-0.00588	0.00514
		0.97	-0.00922	0.007417
		0.973333	-0.00483	0.002844
		0.976667	-0.00594	0.006917
		0.98	-0.00064	0.007301
		0.983333	-0.00287	0.002783
		0.986667	-0.00471	0.003786
		0.99	-0.00772	0.007718
		0.993333	-0.00922	0.004394
		0.996667	-0.00443	0.002299
		1	-0.00493	0.005283
		1.00333	-0.01053	0.002834
		1.00667	-0.0067	0.001013
		1.01	-0.00393	0.003431
		1.01333	-0.00137	0.004747
		1.01667	-0.00339	0.002872
		1.02	-0.00169	0.007144
		1.02333	-0.00188	0.004804
		1.02667	-0.00546	0.002133
		1.03	-0.00632	0.002558
		1.03333	-0.00968	0.005321
		1.03667	-0.0088	0.009477
		1.04	-0.00779	0.004605
		1.04333	-0.00417	0.002809
		1.04667	-0.00279	0.000662
		1.05	-0.0083	0.00435
		1.05333	-0.00664	0.004433
		1.05667	-0.00688	-0.00154
		1.06	-0.00601	0.002283
		1.06333	-0.01012	0.003585
		1.06667	-0.00532	0.003846
		1.07	-0.00487	0.003022
		1.07333	-0.00294	0.002421
		1.07667	-0.00047	0.004904
		1.08	-0.01032	0.000768
		1.08333	-0.00888	0.004706
		1.08667	-0.00484	0.00508
		1.09	-0.00479	0.000749
		1.09333	-0.00715	0.006088
		1.09667	-0.00254	0.005355
		1.1	-0.00676	0.004984
		1.10333	-0.00693	0.002504
		1.10667	-0.00804	0.005643
		1.11	-0.00325	0.003533
		1.11333	-0.00644	-0.00473
		1.11667	-0.00891	0.005932
		1.12	-0.00642	0.003593
		1.12333	-0.00459	-0.00022
		1.12667	-0.01025	0.000775
		1.13	-0.0087	-0.00042
		1.13333	-0.00934	0.001269
		1.13667	-0.00932	0.004512
		1.14	-0.00956	0.001917
		1.14333	-0.01095	0.002761
		1.14667	-0.00668	-0.00047
		1.15	-0.00964	0.00797
		1.15333	-0.01048	0.002882
		1.15667	-0.00875	-0.00312
		1.16	-0.0072	0.002759
		1.16333	-0.00893	-0.00223
		1.16667	-0.00863	0.005025
		1.17	-0.00918	0.000846
		1.17333	-0.01186	0.00467
		1.17667	-0.01061	0.003747
		1.18	-0.00717	-0.0027
		1.18333	-0.00726	0.001744
		1.18667	-0.0092	-0.0026
		1.19	-0.00682	-0.00051
		1.19333	-0.00903	0.004418
		1.19667	-0.00913	0.002373
		1.2	-0.01125	0.005421
		1.20333	-0.00827	0.001676
		1.20667	-0.0123	0.001217
		1.21	-0.01137	0.001559
		1.21333	-0.00321	0.00732
		1.21667	-0.00514	-0.00378
		1.22	-0.00515	0.005365
		1.22333	-0.00522	0.000899
		1.22667	-0.0097	0.005825
		1.23	-0.00883	0.004626
		1.23333	-0.01333	0.002096
		1.23667	-0.01291	-0.00423
		1.24	-0.00626	0.007412
		1.24333	-0.00764	0.004103
		1.24667	-0.00533	0.003838
		1.25	-0.01022	0.002261
		1.25333	-0.00817	0.003059
		1.25667	-0.01242	0.001103
		1.26	-0.00786	0.001602
		1.26333	-0.0092	0.001466
		1.26667	-0.01071	0.003012
		1.27	-0.00739	-5.1e-05
		1.27333	-0.00898	-0.00427
		1.27667	-0.01304	-0.00423
		1.28	-0.01056	0.003095
		1.28333	-0.00635	0.007465
		1.28667	-0.01026	0.003779
		1.29	-0.01593	0.003016
		1.29333	-0.00911	0.002582
		1.29667	-0.00999	0.005523
		1.3	-0.00966	-0.00091
		1.30333	-0.01012	-0.00216
		1.30667	-0.0095	0.003045
		1.31	-0.00892	0.003089
		1.31333	-0.0068	0.002938
		1.31667	-0.01137	0.006029
		1.32	-0.01288	0.000219
		1.32333	0.081401	0.053657
		1.32667	0.132038	0.088837
		1.33	0.181771	0.120815
		1.33333	0.235241	0.147181
		1.33667	0.279723	0.186074
		1.34	0.335872	0.213064
		1.34333	0.389608	0.243599
		1.34667	0.427298	0.27401
		1.35	0.481073	0.30574
		1.35333	0.526902	0.340102
		1.35667	0.574512	0.365084
		1.36	0.617787	0.392754
		1.36333	0.663155	0.419975
		1.36667	0.702723	0.447547
		1.37	0.744819	0.472361
		1.37333	0.784379	0.495553
		1.37667	0.821407	0.52617
		1.38	0.859196	0.547333
		1.38333	0.895552	0.571256
		1.38667	0.927513	0.595681
		1.39	0.9641	0.620361
		1.39333	1.00126	0.636067
		1.39667	1.0293	0.662077
		1.4	1.05936	0.683829
		1.40333	1.08688	0.706154
		1.40667	1.12128	0.723152
		1.41	1.1484	0.745449
		1.41333	1.17733	0.769004
		1.41667	1.19969	0.78211
		1.42	1.22669	0.801567
		1.42333	1.24976	0.82305
		1.42667	1.28009	0.841837
		1.43	1.30107	0.854566
		1.43333	1.32191	0.875713
		1.43667	1.34739	0.891557
		1.44	1.3711	0.913558
		1.44333	1.39042	0.928767
		1.44667	1.40471	0.945691
		1.45	1.43027	0.954641
		1.45333	1.45105	0.973795
		1.45667	1.47328	0.987926
		1.46	1.49012	0.999626
		1.46333	1.50859	1.00927
		1.46667	1.52453	1.03024
		1.47	1.54269	1.04511
		1.47333	1.55906	1.0549
		1.47667	1.57996	1.07138
		1.48	1.59567	1.08197
		1.48333	1.61196	1.09734
		1.48667	1.62285	1.10653
		1.49	1.63847	1.12373
		1.49333	1.65497	1.13338
		1.49667	1.66795	1.14667
		1.5	1.67849	1.15861
		1.50333	1.69508	1.16892
		1.50667	1.71016	1.18016
		1.51	1.72444	1.19349
		1.51333	1.73552	1.20347
		1.51667	1.74737	1.21122
		1.52	1.75953	1.22278
		1.52333	1.77235	1.229
		1.52667	1.77971	1.24256
		1.53	1.7912	1.25042
		1.53333	1.80765	1.26562
		1.53667	1.81634	1.27723
		1.54	1.83251	1.28678
		1.54333	1.84639	1.28971
		1.54667	1.85115	1.30409
		1.55	1.86245	1.31308
		1.55333	1.87741	1.32178
		1.55667	1.88296	1.32881
		1.56	1.89013	1.34234
		1.56333	1.90708	1.35102
		1.56667	1.91702	1.35513
		1.57	1.92084	1.35755
		1.57333	1.93086	1.36806
		1.57667	1.94793	1.37523
		1.58	1.94902	1.38868
		1.58333	1.95945	1.39316
		1.58667	1.96812	1.40212
		1.59	1.97677	1.40558
		1.59333	1.98533	1.41733
		1.59667	1.99448	1.42299
		1.6	2.00827	1.42794
		1.60333	2.01032	1.43856
		1.60667	2.01885	1.44762
		1.61	2.02309	1.45357
		1.61333	2.02981	1.45856
		1.61667	2.03819	1.46916
		1.62	2.04749	1.47133
		1.62333	2.06109	1.47636
		1.62667	2.06404	1.49133
		1.63	2.06812	1.49233
		1.63333	2.07825	1.50032
		1.63667	2.08796	1.50804
		1.64	2.09191	1.51379
		1.64333	2.09874	1.51708
		1.64667	2.10723	1.52989
		1.65	2.11291	1.52855
		1.65333	2.12099	1.53515
		1.65667	2.126	1.54187
		1.66	2.13153	1.55008
		1.66333	2.14036	1.55689
		1.66667	2.14677	1.55866
		1.67	2.15273	1.56267
		1.67333	2.16193	1.57445
		1.67667	2.16426	1.57775
		1.68	2.1697	1.58635
		1.68333	2.17768	1.59111
		1.68667	2.18656	1.5926
		1.69	2.19187	1.59665
		1.69333	2.19707	1.60303
		1.69667	2.2016	1.60665
		1.7	2.2051	1.61823
		1.70333	2.20966	1.61782
		1.70667	2.2151	1.62198
		1.71	2.22715	1.62679
		1.71333	2.23314	1.64017
		1.71667	2.23951	1.63827
		1.72	2.23938	1.64499
		1.72333	2.24816	1.64913
		1.72667	2.24816	1.65541
		1.73	2.255	1.65625
		1.73333	2.25933	1.66406
		1.73667	2.26854	1.66868
		1.74	2.27153	1.6735
		1.74333	2.27724	1.6774
		1.74667	2.28585	1.67685
		1.75	2.28397	1.68451
		1.75333	2.29329	1.68959
		1.75667	2.29626	1.69686
		1.76	2.3006	1.69693
		1.76333	2.30589	1.70433
		1.76667	2.31381	1.70731
		1.77	2.31553	1.71089
		1.77333	2.3231	1.71637
		1.77667	2.32401	1.71748
		1.78	2.32647	1.72752
		1.78333	2.33093	1.72817
		1.78667	2.33581	1.7301
		1.79	2.34295	1.7389
		1.79333	2.34817	1.73962
		1.79667	2.34877	1.74461
		1.8	2.35688	1.74995
		1.80333	2.35887	1.75439
		1.80667	2.36559	1.75609
		1.81	2.37026	1.75708
		1.81333	2.3738	1.76652
		1.81667	2.37851	1.76485
		1.82	2.37992	1.77287
		1.82333	2.38721	1.77611
		1.82667	2.38448	1.77764
		1.83	2.39309	1.7834
		1.83333	2.40307	1.7826
		1.83667	2.4068	1.78696
		1.84	2.40662	1.78917
		1.84333	2.41197	1.79758
		1.84667	2.4098	1.79308
		1.85	2.41798	1.80446
		1.85333	2.41945	1.80378
		1.85667	2.4214	1.81185
		1.86	2.42641	1.8101
		1.86333	2.43302	1.81776
		1.86667	2.43589	1.82012
		1.87	2.44046	1.82461
		1.87333	2.44351	1.82903
		1.87667	2.4449	1.82938
		1.88	2.4501	1.82839
		1.88333	2.45294	1.83765
		1.88667	2.45745	1.84029
		1.89	2.46396	1.8445
		1.89333	2.46473	1.84378
		1.89667	2.4663	1.84762
		1.9	2.47009	1.85538
		1.90333	2.47623	1.85075
		1.90667	2.47663	1.85824
		1.91	2.48129	1.86394
		1.91333	2.48308	1.86422
		1.91667	2.49038	1.86963
		1.92	2.49142	1.87259
		1.92333	2.49573	1.87272
		1.92667	2.49604	1.87916
		1.93	2.50025	1.88156
		1.93333	2.50158	1.88311
		1.93667	2.50647	1.88268
		1.94	2.50836	1.88235
		1.94333	2.5076	1.89303
		1.94667	2.51915	1.89246
		1.95	2.52421	1.89632
		1.95333	2.5239	1.90057
		1.95667	2.52812	1.9006
		1.96	2.52874	1.9054
		1.96333	2.53403	1.91368
		1.96667	2.53092	1.90821
		1.97	2.53465	1.91164
		1.97333	2.54625	1.91563
		1.97667	2.54404	1.9218
		1.98	2.54188	1.91997
		1.98333	2.54854	1.92435
		1.98667	2.55554	1.92893
		1.99	2.55842	1.92889
		1.99333	2.55938	1.92603
		1.99667	2.56166	1.93603
		2	2.56658	1.93853
		2.00333	2.57321	1.93975
		2.00667	2.56847	1.93696
		2.01	2.5721	1.94642
		2.01333	2.58162	1.94977
		2.01667	2.57872	1.9512
		2.02	2.57636	1.9538
		2.02333	2.58591	1.95207
		2.02667	2.58747	1.95801
		2.03	2.59109	1.95769
		2.03333	2.5954	1.96028
		2.03667	2.59329	1.96189
		2.04	2.59783	1.95948
		2.04333	2.59931	1.97115
		2.04667	2.60186	1.97447
		2.05	2.60207	1.97187
		2.05333	2.60728	1.9733
		2.05667	2.60873	1.97755
		2.06	2.6135	1.98335
		2.06333	2.61844	1.98004
		2.06667	2.61603	1.9803
		2.07	2.61711	1.9884
		2.07333	2.6214	1.98981
		2.07667	2.62142	1.98895
		2.08	2.62586	1.99244
		2.08333	2.63225	1.99884
		2.08667	2.63256	1.9941
		2.09	2.62956	1.99701
		2.09333	2.63953	2.00203
		2.09667	2.63984	2.00155
		2.1	2.63957	2.00516
		2.10333	2.64357	2.00697
		2.10667	2.64646	2.00982
		2.11	2.64869	2.01474
		2.11333	2.65064	2.01256
		2.11667	2.65009	2.01987
		2.12	2.65501	2.01917
		2.12333	2.65546	2.02081
		2.12667	2.65863	2.02392
		2.13	2.66102	2.01988
		2.13333	2.66435	2.03021
		2.13667	2.66601	2.03067
		2.14	2.67057	2.03236
		2.14333	2.66797	2.03356
		2.14667	2.67388	2.03868
		2.15	2.67813	2.03884
		2.15333	2.6763	2.03643
		2.15667	2.67716	2.03564
		2.16	2.68015	2.0407
		2.16333	2.68062	2.04047
		2.16667	2.68217	2.04832
		2.17	2.68781	2.05224
		2.17333	2.68965	2.04919
		2.17667	2.69216	2.05121
		2.18	2.69683	2.0529
		2.18333	2.70223	2.06064
		2.18667	2.70363	2.06104
		2.19	2.69911	2.0598
		2.19333	2.70387	2.05886
		2.19667	2.7094	2.06151
		2.2	2.70976	2.063
		2.20333	2.71146	2.06718
		2.20667	2.71573	2.07174
		2.21	2.71322	2.07288
		2.21333	2.70982	2.07016
		2.21667	2.71938	2.07704
		2.22	2.71593	2.07723
		2.22333	2.71723	2.0786
		2.22667	2.72395	2.08013
		2.23	2.7272	2.08208
		2.23333	2.72771	2.08397
		2.23667	2.72703	2.08377
		2.24	2.73023	2.08917
		2.24333	2.73008	2.08802
		2.24667	2.73438	2.08783
		2.25	2.735	2.09749
		2.25333	2.73723	2.09138
		2.25667	2.73313	2.0972
		2.26	2.73753	2.09525
		2.26333	2.75002	2.09784
		2.26667	2.74794	2.10394
		2.27	2.7487	2.10709
		2.27333	2.74953	2.11046
		2.27667	2.75217	2.10609
		2.28	2.75612	2.10953
		2.28333	2.75818	2.11793
		2.28667	2.75562	2.11094
		2.29	2.75653	2.11632
		2.29333	2.7597	2.11701
		2.29667	2.76231	2.11752
		2.3	2.76607	2.11692
		2.30333	2.76459	2.12561
		2.30667	2.7649	2.12205
		2.31	2.77148	2.12341
		2.31333	2.77228	2.12799
		2.31667	2.77105	2.12507
		2.32	2.77036	2.12923
		2.32333	2.7771	2.13185
		2.32667	2.77874	2.13597
		2.33	2.7767	2.13318
		2.33333	2.78034	2.13695
		2.33667	2.77997	2.13328
		2.34	2.78418	2.13665
		2.34333	2.78761	2.13545
		2.34667	2.79346	2.1421
		2.35	2.7917	2.14321
		2.35333	2.79034	2.14325
		2.35667	2.7931	2.14486
		2.36	2.79533	2.14368
		2.36333	2.79696	2.14959
		2.36667	2.79419	2.1519
		2.37	2.79658	2.1498
		2.37333	2.79909	2.15093
		2.37667	2.80666	2.15179
		2.38	2.80297	2.1513
		2.38333	2.81026	2.15685
		2.38667	2.80793	2.16004
		2.39	2.81213	2.15687
		2.39333	2.80634	2.16199
		2.39667	2.81012	2.16054
		2.4	2.81467	2.16479
		2.40333	2.8178	2.16222
		2.40667	2.81193	2.16002
		2.41	2.8175	2.17239
		2.41333	2.82109	2.16681
		2.41667	2.82227	2.16735
		2.42	2.82456	2.17594
		2.42333	2.82705	2.17213
		2.42667	2.82668	2.17736
		2.43	2.82925	2.17604
		2.43333	2.82801	2.17492
		2.43667	2.82606	2.17677
		2.44	2.83188	2.18173
		2.44333	2.83138	2.18353
		2.44667	2.83426	2.18142
		2.45	2.83499	2.18285
		2.45333	2.83397	2.18473
		2.45667	2.8378	2.18822
		2.46	2.83995	2.18473
		2.46333	2.84732	2.1851
		2.46667	2.83887	2.19219
		2.47	2.84211	2.19235
		2.47333	2.84593	2.19318
		2.47667	2.84927	2.19337
		2.48	2.85073	2.19482
		2.48333	2.84644	2.19756
		2.48667	2.84991	2.19176
		2.49	2.85217	2.20079
		2.49333	2.85462	2.20018
		2.49667	2.86082	2.20453
		2.5	2.85762	2.20536
		2.50333	2.85919	2.20507
		2.50667	2.86013	2.20575
		2.51	2.85717	2.20711
		2.51333	2.86418	2.2115
		2.51667	2.86268	2.20997
		2.52	2.86221	2.21041
		2.52333	2.86565	2.21105
		2.52667	2.86636	2.21352
		2.53	2.8721	2.21341
		2.53333	2.87021	2.21655
		2.53667	2.86929	2.22228
		2.54	2.87232	2.21645
		2.54333	2.87535	2.22236
		2.54667	2.87641	2.22354
		2.55	2.87705	2.22247
		2.55333	2.87673	2.22219
		2.55667	2.87859	2.22177
		2.56	2.87853	2.22052
		2.56333	2.87779	2.22634
		2.56667	2.88465	2.22809
		2.57	2.88565	2.23047
		2.57333	2.8883	2.22964
		2.57667	2.88382	2.23236
		2.58	2.8837	2.23431
		2.58333	2.88862	2.23492
		2.58667	2.89013	2.23603
		2.59	2.88923	2.23406
		2.59333	2.89142	2.23794
		2.59667	2.89968	2.24151
		2.6	2.89552	2.23772
		2.60333	2.89879	2.2431
		2.60667	2.89301	2.2395
		2.61	2.89877	2.2432
		2.61333	2.89521	2.2449
		2.61667	2.90027	2.24148
		2.62	2.90585	2.24377
		2.62333	2.90515	2.24738
		2.62667	2.9021	2.25074
		2.63	2.909	2.24731
		2.63333	2.90565	2.24693
		2.63667	2.90949	2.25232
		2.64	2.91185	2.25542
		2.64333	2.91284	2.2505
		2.64667	2.91096	2.25386
		2.65	2.91834	2.25686
		2.65333	2.91474	2.25789
		2.65667	2.91907	2.2605
		2.66	2.92002	2.2552
		2.66333	2.91775	2.26029
		2.66667	2.91956	2.25666
		2.67	2.92062	2.26589
		2.67333	2.92266	2.26427
		2.67667	2.92466	2.26599
		2.68	2.92239	2.26855
		2.68333	2.92934	2.26504
		2.68667	2.92798	2.26838
		2.69	2.92737	2.2669
		2.69333	2.93021	2.27038
		2.69667	2.93036	2.26968
		2.7	2.93008	2.27059
		2.70333	2.93733	2.27792
		2.70667	2.93319	2.2711
		2.71	2.93489	2.27715
		2.71333	2.93541	2.27679
		2.71667	2.9377	2.27772
		2.72	2.94149	2.28036
		2.72333	2.93983	2.28169
		2.72667	2.93712	2.27893
		2.73	2.93647	2.27703
		2.73333	2.94437	2.27689
		2.73667	2.94326	2.28271
		2.74	2.94535	2.28438
		2.74333	2.9471	2.28455
		2.74667	2.95194	2.28165
		2.75	2.94308	2.2863
		2.75333	2.94425	2.28555
		2.75667	2.94805	2.28503
		2.76	2.94906	2.29147
		2.76333	2.9483	2.29201
		2.76667	2.95258	2.2927
		2.77	2.95134	2.29187
		2.77333	2.9541	2.29463
		2.77667	2.95609	2.29497
		2.78	2.95806	2.29568
		2.78333	2.95525	2.29499
		2.78667	2.95501	2.29611
		2.79	2.95873	2.29907
		2.79333	2.95913	2.29688
		2.79667	2.96206	2.29889
		2.8	2.96105	2.29746
		2.80333	2.96771	2.30552
		2.80667	2.96182	2.30023
		2.81	2.96651	2.30469
		2.81333	2.96669	2.30451
		2.81667	2.96878	2.30735
		2.82	2.96675	2.299
		2.82333	2.96848	2.30975
		2.82667	2.97132	2.30551
		2.83	2.97073	2.3106
		2.83333	2.97539	2.30749
		2.83667	2.97389	2.30506
		2.84	2.97245	2.31609
		2.84333	2.97258	2.30983
		2.84667	2.97552	2.31272
		2.85	2.97964	2.31663
		2.85333	2.97653	2.31621
		2.85667	2.98544	2.31429
		2.86	2.98523	2.31986
		2.86333	2.98334	2.31764
		2.86667	2.97919	2.31442
		2.87	2.98647	2.31698
		2.87333	2.98659	2.32069
		2.87667	2.98175	2.32118
		2.88	2.9884	2.31751
		2.88333	2.98708	2.31989
		2.88667	2.98872	2.32126
		2.89	2.98828	2.32764
		2.89333	2.98757	2.32186
		2.89667	2.99514	2.32749
		2.9	2.99343	2.3269
		2.90333	2.99309	2.32744
		2.90667	2.99288	2.3317
		2.91	2.99158	2.33099
		2.91333	2.99428	2.33073
		2.91667	2.99434	2.33296
		2.92	2.99579	2.33484
		2.92333	2.99945	2.33703
		2.92667	2.99497	2.32976
		2.93	3.0035	2.33555
		2.93333	3.00319	2.3337
		2.93667	3.00313	2.33257
		2.94	3.00372	2.33806
		2.94333	3.00516	2.33537
		2.94667	3.00411	2.33931
		2.95	3.00309	2.33822
		2.95333	3.00751	2.34352
		2.95667	3.00728	2.34809
		2.96	3.00345	2.33875
		2.96333	3.00473	2.34099
		2.96667	3.00735	2.34534
		2.97	3.01464	2.34121
		2.97333	3.01127	2.34344
		2.97667	3.01385	2.35106
		2.98	3.01374	2.34481
		2.98333	3.01119	2.34992
		2.98667	3.01121	2.35048
		2.99	3.01725	2.35295
		2.99333	3.01698	2.35462
		2.99667	3.02046	2.34933
		3	3.02084	2.34928
		3.00333	3.01482	2.34913
		3.00667	3.01735	2.35374
		3.01	3.02261	2.35422
		3.01333	3.02575	2.35224
		3.01667	3.01846	2.35393
		3.02	3.02377	2.35754
		3.02333	3.02801	2.36188
		3.02667	3.02432	2.36221
		3.03	3.02526	2.35781
		3.03333	3.02899	2.35983
		3.03667	3.03165	2.35851
		3.04	3.02619	2.3583
		3.04333	3.03114	2.36823
		3.04667	3.03188	2.36071
		3.05	3.029	2.36248
		3.05333	3.02794	2.36382
		3.05667	3.03208	2.36434
		3.06	3.03194	2.36903
		3.06333	3.02861	2.36566
		3.06667	3.03608	2.36564
		3.07	3.03818	2.36938
		3.07333	3.03749	2.36819
		3.07667	3.03721	2.36822
		3.08	3.04136	2.37109
		3.08333	3.03674	2.37116
		3.08667	3.04075	2.37496
		3.09	3.04042	2.37359
		3.09333	3.04081	2.37444
		3.09667	3.04477	2.36914
		3.1	3.04362	2.37424
		3.10333	3.03857	2.37458
		3.10667	3.0413	2.37339
		3.11	3.04609	2.37641
		3.11333	3.04183	2.37672
		3.11667	3.04166	2.37337
		3.12	3.04883	2.3843
		3.12333	3.04495	2.38181
		3.12667	3.04908	2.38174
		3.13	3.04679	2.37558
		3.13333	3.05453	2.38541
		3.13667	3.05081	2.38548
		3.14	3.05119	2.38269
		3.14333	3.05143	2.38474
		3.14667	3.05235	2.38084
		3.15	3.05557	2.38317
		3.15333	3.05698	2.3935
		3.15667	3.05181	2.3847
		3.16	3.05663	2.38364
		3.16333	3.05724	2.3877
		3.16667	3.05605	2.38952
		3.17	3.05627	2.38754
		3.17333	3.05966	2.39209
		3.17667	3.06648	2.38545
		3.18	3.06222	2.39116
		3.18333	3.0619	2.38916
		3.18667	3.06538	2.39512
		3.19	3.06408	2.39055
		3.19333	3.06256	2.39481
		3.19667	3.06638	2.39732
		3.2	3.06499	2.39683
		3.20333	3.06776	2.39237
		3.20667	3.06687	2.39796
		3.21	3.06511	2.39834
		3.21333	3.06845	2.39683
		3.21667	3.06629	2.39602
		3.22	3.06854	2.39552
		3.22333	3.07356	2.39799
		3.22667	3.07664	2.40467
		3.23	3.07033	2.39904
		3.23333	3.07308	2.40095
		3.23667	3.07079	2.40169
		3.24	3.0727	2.40333
		3.24333	3.07592	2.3991
		3.24667	3.07666	2.40335
		3.25	3.07572	2.40818
		3.25333	3.07182	2.40698
		3.25667	3.07626	2.4087
		3.26	3.07773	2.4054
		3.26333	3.07616	2.40604
		3.26667	3.08047	2.41143
		3.27	3.07796	2.40782
		3.27333	3.08465	2.40756
		3.27667	3.08751	2.40652
		3.28	3.08022	2.40931
		3.28333	3.08325	2.41075
		3.28667	3.08256	2.40794
		3.29	3.08845	2.41601
		3.29333	3.08506	2.41306
		3.29667	3.08623	2.40853
		3.3	3.0865	2.41619
		3.30333	3.08846	2.41685
		3.30667	3.08336	2.41381
		3.31	3.08774	2.41253
		3.31333	3.08325	2.41288
		3.31667	3.08262	2.41454
		3.32	3.08867	2.41635
		3.32333	3.09566	2.42135
		3.32667	3.08871	2.41723
		3.33	3.09321	2.42014
		3.33333	3.0923	2.4137
		3.33667	3.09571	2.4194
		3.34	3.09243	2.42324
		3.34333	3.09443	2.42066
		3.34667	3.09315	2.42092
		3.35	3.09628	2.4213
		3.35333	3.09588	2.42231
		3.35667	3.1001	2.42314
		3.36	3.09904	2.42404
		3.36333	3.09578	2.42437
		3.36667	3.09653	2.42576
		3.37	3.09781	2.4302
		3.37333	3.10158	2.42447
		3.37667	3.10392	2.42818
		3.38	3.10535	2.42716
		3.38333	3.10143	2.42893
		3.38667	3.10139	2.42652
		3.39	3.10341	2.42913
		3.39333	3.1064	2.43245
		3.39667	3.10259	2.43031
		3.4	3.1069	2.43235
		3.40333	3.10385	2.43352
		3.40667	3.10675	2.43353
		3.41	3.10587	2.43684
		3.41333	3.10716	2.43357
		3.41667	3.11124	2.4331
		3.42	3.10723	2.43129
		3.42333	3.10906	2.43606
		3.42667	3.11051	2.43777
		3.43	3.11162	2.43527
		3.43333	3.11018	2.4358
		3.43667	3.11264	2.44033
		3.44	3.11036	2.43151
		3.44333	3.11193	2.43421
		3.44667	3.11233	2.4365
		3.45	3.11108	2.43739
		3.45333	3.11893	2.43944
		3.45667	3.11676	2.4485
		3.46	3.1151	2.4415
		3.46333	3.11753	2.43921
		3.46667	3.11665	2.44082
		3.47	3.11996	2.44623
		3.47333	3.12295	2.44193
		3.47667	3.11905	2.44353
		3.48	3.1206	2.44191
		3.48333	3.12094	2.44854
		3.48667	3.121	2.43825
		3.49	3.11989	2.4447
		3.49333	3.12195	2.44985
		3.49667	3.12869	2.44678
		3.5	3.12276	2.44713
		3.50333	3.12379	2.45018
		3.50667	3.12116	2.45227
		3.51	3.12956	2.44995
		3.51333	3.12326	2.45124
		3.51667	3.12744	2.44844
		3.52	3.1252	2.45388
		3.52333	3.13033	2.44979
		3.52667	3.12999	2.45138
		3.53	3.12577	2.45434
		3.53333	3.12694	2.45114
		3.53667	3.12977	2.45094
		3.54	3.13161	2.45812
		3.54333	3.13517	2.45597
		3.54667	3.13288	2.45432
		3.55	3.12849	2.45074
		3.55333	3.13291	2.45836
		3.55667	3.1311	2.45881
		3.56	3.13117	2.45853
		3.56333	3.13942	2.46055
		3.56667	3.1384	2.46357
		3.57	3.13893	2.45992
		3.57333	3.13629	2.45853
		3.57667	3.13671	2.45444
		3.58	3.13241	2.46687
		3.58333	3.13995	2.46117
		3.58667	3.13568	2.46385
		3.59	3.13984	2.45969
		3.59333	3.14185	2.45913
		3.59667	3.13895	2.46416
		3.6	3.14192	2.46662
		3.60333	3.13897	2.46597
		3.60667	3.13885	2.46474
		3.61	3.14388	2.46891
		3.61333	3.14255	2.46984
		3.61667	3.14478	2.46744
		3.62	3.14335	2.46638
		3.62333	3.14961	2.46682
		3.62667	3.14361	2.4708
		3.63	3.14268	2.46416
		3.63333	3.14922	2.46656
		3.63667	3.14648	2.46469
		3.64	3.14869	2.46713
		3.64333	3.14727	2.46773
		3.64667	3.15017	2.47211
		3.65	3.14935	2.47066
		3.65333	3.14784	2.47182
		3.65667	3.15567	2.47175
		3.66	3.15527	2.46912
		3.66333	3.15183	2.47284
		3.66667	3.15402	2.47553
		3.67	3.14988	2.47553
		3.67333	3.15415	2.47197
		3.67667	3.15705	2.47343
		3.68	3.15151	2.47231
		3.68333	3.15291	2.47365
		3.68667	3.15748	2.47457
		3.69	3.15695	2.47225
		3.69333	3.15466	2.47911
		3.69667	3.158	2.47882
		3.7	3.15867	2.4796
		3.70333	3.15715	2.47934
		3.70667	3.15213	2.47587
		3.71	3.15812	2.47935
		3.71333	3.16169	2.48219
		3.71667	3.15872	2.47927
		3.72	3.1597	2.47893
		3.72333	3.15864	2.4782
		3.72667	3.16202	2.48277
		3.73	3.1613	2.48372
		3.73333	3.16104	2.48642
		3.73667	3.16372	2.48403
		3.74	3.16631	2.48549
		3.74333	3.16005	2.48528
		3.74667	3.16027	2.485
		3.75	3.16591	2.4855
		3.75333	3.16464	2.48137
		3.75667	3.1649	2.48262
		3.76	3.16372	2.48704
		3.76333	3.17134	2.48328
		3.76667	3.16947	2.48485
		3.77	3.17001	2.49098
		3.77333	3.16796	2.48631
		3.77667	3.16818	2.48492
		3.78	3.16776	2.4919
		3.78333	3.16804	2.48964
		3.78667	3.17161	2.48929
		3.79	3.17254	2.49229
		3.79333	3.17144	2.49259
		3.79667	3.17174	2.49188
		3.8	3.17414	2.49355
		3.80333	3.17235	2.49166
		3.80667	3.16965	2.49113
		3.81	3.1657	2.49559
		3.81333	3.17368	2.49619
		3.81667	3.17671	2.49447
		3.82	3.17241	2.50042
		3.82333	3.17695	2.49555
		3.82667	3.16844	2.49748
		3.83	3.17435	2.49487
		3.83333	3.17322	2.5006
		3.83667	3.17577	2.49646
		3.84	3.17638	2.49777
		3.84333	3.17512	2.49828
		3.84667	3.17667	2.49779
		3.85	3.17966	2.49542
		3.85333	3.18312	2.4949
		3.85667	3.1796	2.49884
		3.86	3.18178	2.50375
		3.86333	3.18389	2.50061
		3.86667	3.18014	2.50563
		3.87	3.18145	2.50108
		3.87333	3.18477	2.50156
		3.87667	3.18423	2.50004
		3.88	3.18431	2.50183
		3.88333	3.18648	2.49804
		3.88667	3.18159	2.50346
		3.89	3.18675	2.50425
		3.89333	3.1853	2.50414
		3.89667	3.18988	2.50239
		3.9	3.18283	2.50171
		3.90333	3.18261	2.50498
		3.90667	3.18775	2.50429
		3.91	3.18519	2.50661
		3.91333	3.18924	2.50802
		3.91667	3.191	2.507
		3.92	3.19	2.50553
		3.92333	3.19224	2.50829
		3.92667	3.19256	2.50374
		3.93	3.187	2.50842
		3.93333	3.19278	2.51064
		3.93667	3.19114	2.50738
		3.94	3.18939	2.51245
		3.94333	3.19346	2.50928
		3.94667	3.19166	2.50817
		3.95	3.19399	2.50868
		3.95333	3.19535	2.50928
		3.95667	3.19557	2.51821
		3.96	3.19416	2.51553
		3.96333	3.19257	2.51147
		3.96667	3.19297	2.51062
		3.97	3.19354	2.51155
		3.97333	3.19631	2.51784
		3.97667	3.19683	2.51543
		3.98	3.20159	2.51233
		3.98333	3.19506	2.51774
		3.98667	3.20052	2.5113
		3.99	3.19694	2.51314
		3.99333	3.1994	2.51395
		3.99667	3.19655	2.51567
		4	3.2035	2.5257
		4.00333	3.20098	2.51695
		4.00667	3.20216	2.51724
		4.01	3.19938	2.52332
		4.01333	3.20217	2.51894
		4.01667	3.19992	2.52193
		4.02	3.20109	2.51838
		4.02333	3.20188	2.51826
		4.02667	3.20384	2.51931
		4.03	3.19873	2.52283
		4.03333	3.2049	2.52775
		4.03667	3.20247	2.52524
		4.04	3.20359	2.52438
		4.04333	3.20622	2.51812
		4.04667	3.19773	2.52286
		4.05	3.20597	2.52502
		4.05333	3.2048	2.52536
		4.05667	3.20839	2.52395
		4.06	3.20562	2.52369
		4.06333	3.20593	2.5242
		4.06667	3.21219	2.52398
		4.07	3.2117	2.52779
		4.07333	3.20537	2.52823
		4.07667	3.2117	2.5229
		4.08	3.20703	2.52527
		4.08333	3.21024	2.52935
		4.08667	3.21022	2.52818
		4.09	3.21277	2.52745
		4.09333	3.21314	2.52999
		4.09667	3.21573	2.52869
		4.1	3.21396	2.52635
		4.10333	3.21082	2.52572
		4.10667	3.21253	2.52811
		4.11	3.21463	2.52679
		4.11333	3.2139	2.52767
		4.11667	3.21434	2.53207
		4.12	3.21597	2.53266
		4.12333	3.21483	2.53435
		4.12667	3.21923	2.53576
		4.13	3.21604	2.52657
		4.13333	3.21469	2.53138
		4.13667	3.22005	2.53469
		4.14	3.22057	2.52726
		4.14333	3.2161	2.53719
		4.14667	3.21691	2.53299
		4.15	3.2191	2.53341
		4.15333	3.21786	2.53179
		4.15667	3.21895	2.53138
		4.16	3.21911	2.5336
		4.16333	3.21876	2.53522
		4.16667	3.21935	2.53393
		4.17	3.22342	2.53435
		4.17333	3.22694	2.5362
		4.17667	3.22331	2.53618
		4.18	3.22316	2.53794
		4.18333	3.22349	2.5385
		4.18667	3.22305	2.53961
		4.19	3.22355	2.53834
		4.19333	3.22546	2.53634
		4.19667	3.22261	2.54165
		4.2	3.22482	2.53366
		4.20333	3.2249	2.53661
		4.20667	3.22822	2.53967
		4.21	3.22601	2.53932
		4.21333	3.22824	2.54568
		4.21667	3.22301	2.54412
		4.22	3.22572	2.54601
		4.22333	3.22686	2.53999
		4.22667	3.22499	2.54242
		4.23	3.22941	2.54104
		4.23333	3.23197	2.54187
		4.23667	3.22893	2.5454
		4.24	3.22883	2.54447
		4.24333	3.22963	2.54408
		4.24667	3.23078	2.54498
		4.25	3.23329	2.54419
		4.25333	3.23249	2.54252
		4.25667	3.23005	2.5468
		4.26	3.23601	2.54266
		4.26333	3.23382	2.54549
		4.26667	3.23353	2.54833
		4.27	3.2402	2.55201
		4.27333	3.23613	2.54763
		4.27667	3.23424	2.54666
		4.28	3.23197	2.54715
		4.28333	3.23509	2.54711
		4.28667	3.23529	2.55006
		4.29	3.23153	2.55186
		4.29333	3.23662	2.54795
		4.29667	3.23501	2.55171
		4.3	3.23545	2.55026
		4.30333	3.23679	2.54411
		4.30667	3.23652	2.55217
		4.31	3.23903	2.55073
		4.31333	3.23943	2.55644
		4.31667	3.23972	2.55047
		4.32	3.24044	2.55311
		4.32333	3.23906	2.55054
		4.32667	3.23657	2.54922
		4.33	3.23733	2.54826
		4.33333	3.23889	2.55082
		4.33667	3.24087	2.55568
		4.34	3.24038	2.55344
		4.34333	3.23954	2.55321
		4.34667	3.23735	2.55263
		4.35	3.24015	2.55144
		4.35333	3.24287	2.55428
		4.35667	3.24219	2.55295
		4.36	3.2486	2.55533
		4.36333	3.24622	2.55482
		4.36667	3.24386	2.55537
		4.37	3.24907	2.55751
		4.37333	3.24303	2.55796
		4.37667	3.24438	2.55664
		4.38	3.24821	2.55891
		4.38333	3.24795	2.55781
		4.38667	3.24257	2.55806
		4.39	3.24546	2.55825
		4.39333	3.24602	2.55959
		4.39667	3.24667	2.55551
		4.4	3.24782	2.5626
		4.40333	3.24951	2.55987
		4.40667	3.25059	2.56183
		4.41	3.25172	2.55741
		4.41333	3.25129	2.562
		4.41667	3.25154	2.55999
		4.42	3.25132	2.56145
		4.42333	3.25081	2.56185
		4.42667	3.24952	2.56258
		4.43	3.25274	2.56155
		4.43333	3.253	2.5639
		4.43667	3.25197	2.56229
		4.44	3.2524	2.56397
		4.44333	3.25334	2.56355
		4.44667	3.25052	2.55707
		4.45	3.25052	2.56718
		4.45333	3.25315	2.56741
		4.45667	3.25448	2.5634
		4.46	3.25622	2.5677
		4.46333	3.25383	2.56864
		4.46667	3.25149	2.56508
		4.47	3.25407	2.56539
		4.47333	3.25661	2.56448
		4.47667	3.26144	2.56996
		4.48	3.25492	2.56162
		4.48333	3.25543	2.5709
		4.48667	3.25568	2.56522
		4.49	3.25507	2.56973
		4.49333	3.2591	2.56641
		4.49667	3.25308	2.56379
		4.5	3.25885	2.56826
		4.50333	3.25724	2.5668
		4.50667	3.2581	2.57618
		4.51	3.25708	2.56492
		4.51333	3.25858	2.5701
		4.51667	3.26176	2.57425
		4.52	3.25936	2.57409
		4.52333	3.26044	2.57136
		4.52667	3.25991	2.56934
		4.53	3.26045	2.56878
		4.53333	3.26253	2.5696
		4.53667	3.25758	2.57015
		4.54	3.2641	2.57617
		4.54333	3.26308	2.57732
		4.54667	3.26192	2.57157
		4.55	3.26488	2.57032
		4.55333	3.26594	2.56927
		4.55667	3.26688	2.57342
		4.56	3.26343	2.57258
		4.56333	3.2626	2.57626
		4.56667	3.26578	2.5776
		4.57	3.26694	2.57118
		4.57333	3.26106	2.5767
		4.57667	3.26526	2.57448
		4.58	3.26214	2.57477
		4.58333	3.26678	2.57454
		4.58667	3.2664	2.57684
		4.59	3.27018	2.57735
		4.59333	3.26265	2.57556
		4.59667	3.26499	2.58118
		4.6	3.26926	2.57916
		4.60333	3.27015	2.573
		4.60667	3.26387	2.58155
		4.61	3.27086	2.57759
		4.61333	3.26827	2.5749
		4.61667	3.26972	2.58215
		4.62	3.27034	2.58191
		4.62333	3.26822	2.57866
		4.62667	3.27234	2.57886
		4.63	3.27933	2.58313
		4.63333	3.27007	2.58145
		4.63667	3.26718	2.58371
		4.64	3.27145	2.58106
		4.64333	3.27264	2.58362
		4.64667	3.27079	2.58236
		4.65	3.27001	2.58113
		4.65333	3.27066	2.58562
		4.65667	3.27671	2.58263
		4.66	3.27372	2.58394
		4.66333	3.27638	2.57988
		4.66667	3.27584	2.58154
		4.67	3.27291	2.58635
		4.67333	3.27564	2.58696
		4.67667	3.27618	2.58464
		4.68	3.27525	2.58662
		4.68333	3.2785	2.58638
		4.68667	3.27871	2.58675
		4.69	3.2759	2.58473
		4.69333	3.27942	2.58309
		4.69667	3.27419	2.58406
		4.7	3.27908	2.58816
		4.70333	3.28019	2.58971
		4.70667	3.27691	2.59279
		4.71	3.27884	2.58427
		4.71333	3.28012	2.5888
		4.71667	3.27915	2.5845
		4.72	3.28213	2.58458
		4.72333	3.2823	2.58568
		4.72667	3.28017	2.58934
		4.73	3.28286	2.58798
		4.73333	3.28269	2.58777
		4.73667	3.28261	2.5928
		4.74	3.28062	2.59272
		4.74333	3.28021	2.58611
		4.74667	3.28338	2.58962
		4.75	3.28186	2.59405
		4.75333	3.2821	2.59111
		4.75667	3.28267	2.59432
		4.76	3.28504	2.59363
		4.76333	3.28494	2.59034
		4.76667	3.27935	2.5943
		4.77	3.28378	2.58907
		4.77333	3.28758	2.59362
		4.77667	3.28639	2.58981
		4.78	3.28225	2.59565
		4.78333	3.28393	2.59239
		4.78667	3.28358	2.59347
		4.79	3.28469	2.59458
		4.79333	3.28753	2.59618
		4.79667	3.28769	2.5932
		4.8	3.28859	2.59323
		4.80333	3.28573	2.59985
		4.80667	3.28793	2.59641
		4.81	3.29075	2.59402
		4.81333	3.28959	2.59447
		4.81667	3.28819	2.59821
		4.82	3.29134	2.59701
		4.82333	3.2876	2.59715
		4.82667	3.28903	2.59914
		4.83	3.29336	2.5967
		4.83333	3.29446	2.59816
		4.83667	3.29025	2.59833
		4.84	3.28673	2.59696
		4.84333	3.29044	2.59788
		4.84667	3.28649	2.59892
		4.85	3.28854	2.60368
		4.85333	3.29406	2.59741
		4.85667	3.29203	2.60705
		4.86	3.29265	2.59887
		4.86333	3.29632	2.59524
		4.86667	3.29299	2.59699
		4.87	3.29408	2.60054
		4.87333	3.29319	2.60275
		4.87667	3.29642	2.60084
		4.88	3.29572	2.60076
		4.88333	3.29498	2.59915
		4.88667	3.29196	2.60441
		4.89	3.2917	2.60839
		4.89333	3.29407	2.60291
		4.89667	3.2956	2.60317
		4.9	3.29528	2.60089
		4.90333	3.29753	2.60068
		4.90667	3.2966	2.60346
		4.91	3.29462	2.60327
		4.91333	3.29561	2.60499
		4.91667	3.29726	2.60481
		4.92	3.2888	2.60379
		4.92333	3.30274	2.60402
		4.92667	3.29573	2.60597
		4.93	3.29891	2.60042
		4.93333	3.29735	2.61004
		4.93667	3.30254	2.59939
		4.94	3.30274	2.60884
		4.94333	3.30361	2.60684
		4.94667	3.30052	2.60409
		4.95	3.29623	2.60767
		4.95333	3.30201	2.60758
		4.95667	3.29901	2.61096
		4.96	3.29884	2.60789
		4.96333	3.29982	2.61036
		4.96667	3.30358	2.60968
		4.97	3.29955	2.60874
		4.97333	3.30395	2.60581
		4.97667	3.30438	2.60485
		4.98	3.30366	2.60856
		4.98333	3.30239	2.61068
		4.98667	3.30784	2.61006
		4.99	3.3021	2.60904
		4.99333	3.30525	2.61328
		4.99667	3.30402	2.60799
		5	3.30307	2.60865
		5.00333	3.30433	2.60827
		5.00667	3.30592	2.60975
		5.01	3.30589	2.61063
		5.01333	3.30442	2.60669
		5.01667	3.30626	2.60676
		5.02	3.30557	2.61013
		5.02333	3.30593	2.61401
		5.02667	3.31114	2.61214
		5.03	3.30366	2.61201
		5.03333	3.3058	2.61156
		5.03667	3.3078	2.60904
		5.04	3.30986	2.61486
		5.04333	3.3059	2.61484
		5.04667	3.30641	2.61223
		5.05	3.30896	2.61103
		5.05333	3.30695	2.61079
		5.05667	3.30889	2.61607
		5.06	3.31022	2.61534
		5.06333	3.30839	2.61618
		5.06667	3.3146	2.61647
		5.07	3.31318	2.61637
		5.07333	3.30966	2.61464
		5.07667	3.31321	2.61384
		5.08	3.31163	2.61519
		5.08333	3.31316	2.61237
		5.08667	3.31478	2.61917
		5.09	3.31086	2.61467
		5.09333	3.31245	2.61741
		5.09667	3.31457	2.61967
		5.1	3.31376	2.61496
		5.10333	3.30809	2.61998
		5.10667	3.31436	2.61925
		5.11	3.30848	2.61876
		5.11333	3.31321	2.61823
		5.11667	3.31663	2.62079
		5.12	3.31025	2.62005
		5.12333	3.31397	2.6206
		5.12667	3.31549	2.6191
		5.13	3.31268	2.61898
		5.13333	3.31922	2.6199
		5.13667	3.3154	2.62018
		5.14	3.31879	2.62095
		5.14333	3.32223	2.6199
		5.14667	3.31729	2.6256
		5.15	3.31434	2.62216
		5.15333	3.32246	2.61826
		5.15667	3.31975	2.62064
		5.16	3.3214	2.62155
		5.16333	3.31767	2.62189
		5.16667	3.31786	2.62604
		5.17	3.31942	2.62024
		5.17333	3.31893	2.6221
		5.17667	3.31709	2.62148
		5.18	3.31948	2.61718
		5.18333	3.3236	2.62547
		5.18667	3.31922	2.62038
		5.19	3.31993	2.62339
		5.19333	3.3195	2.61698
		5.19667	3.32029	2.61909
		5.2	3.3225	2.62256
		5.20333	3.32195	2.62451
		5.20667	3.32308	2.62879
		5.21	3.32504	2.62555
		5.21333	3.32215	2.62969
		5.21667	3.32218	2.62379
		5.22	3.32128	2.62952
		5.22333	3.32572	2.62938
		5.22667	3.32124	2.62285
		5.23	3.32517	2.62758
		5.23333	3.32506	2.62399
		5.23667	3.32036	2.62694
		5.24	3.32107	2.62409
		5.24333	3.32526	2.62637
		5.24667	3.32639	2.63073
		5.25	3.32642	2.6293
		5.25333	3.32567	2.62803
		5.25667	3.32322	2.6252
		5.26	3.32267	2.62845
		5.26333	3.32513	2.63058
		5.26667	3.33251	2.63196
		5.27	3.32362	2.6329
		5.27333	3.32624	2.6261
		5.27667	3.3303	2.63109
		5.28	3.3301	2.62959
		5.28333	3.33255	2.63093
		5.28667	3.33032	2.63037
		5.29	3.3292	2.62881
		5.29333	3.32747	2.63026
		5.29667	3.32776	2.62947
		5.3	3.3296	2.63162
		5.30333	3.32825	2.63588
		5.30667	3.32921	2.63271
		5.31	3.33075	2.6286
		5.31333	3.32712	2.63852
		5.31667	3.32998	2.6278
		5.32	3.33061	2.63249
		5.32333	3.32985	2.63206
		5.32667	3.33339	2.63354
		5.33	3.32737	2.64142
		5.33333	3.33449	2.63578
		5.33667	3.33136	2.6346
		5.34	3.3336	2.63212
		5.34333	3.32936	2.63072
		5.34667	3.33124	2.6346
		5.35	3.33218	2.63506
		5.35333	3.33595	2.63426
		5.35667	3.33026	2.63741
		5.36	3.33033	2.63285
		5.36333	3.33284	2.63956
		5.36667	3.33286	2.63497
		5.37	3.3346	2.63579
		5.37333	3.33447	2.63853
		5.37667	3.33249	2.63928
		5.38	3.33816	2.63514
		5.38333	3.3357	2.63679
		5.38667	3.3386	2.63904
		5.39	3.33458	2.63797
		5.39333	3.33855	2.63788
		5.39667	3.33837	2.64224
		5.4	3.33451	2.63608
		5.40333	3.33722	2.63118
		5.40667	3.33324	2.64189
		5.41	3.33861	2.63567
		5.41333	3.3404	2.6382
		5.41667	3.34107	2.63605
		5.42	3.33559	2.63859
		5.42333	3.33531	2.64347
		5.42667	3.33702	2.63889
		5.43	3.33718	2.6336
		5.43333	3.34288	2.64095
		5.43667	3.34084	2.64143
		5.44	3.33787	2.64334
		5.44333	3.34001	2.64434
		5.44667	3.34116	2.6395
		5.45	3.33658	2.64081
		5.45333	3.3407	2.64304
		5.45667	3.33943	2.64056
		5.46	3.33872	2.63918
		5.46333	3.34238	2.64418
		5.46667	3.33819	2.64051
		5.47	3.3428	2.64298
		5.47333	3.34325	2.64463
		5.47667	3.34409	2.64422
		5.48	3.34452	2.64996
		5.48333	3.34534	2.64718
		5.48667	3.33875	2.64672
		5.49	3.34084	2.64162
		5.49333	3.33776	2.64355
		5.49667	3.34029	2.64703
		5.5	3.34201	2.64397
		5.50333	3.33794	2.64539
		5.50667	3.3445	2.6453
		5.51	3.34726	2.64243
		5.51333	3.3435	2.64567
		5.51667	3.34107	2.64446
		5.52	3.34278	2.64462
		5.52333	3.3485	2.64433
		5.52667	3.34265	2.64262
		5.53	3.34411	2.64703
		5.53333	3.3462	2.64951
		5.53667	3.3428	2.6453
		5.54	3.34921	2.6495
		5.54333	3.3479	2.65239
		5.54667	3.34458	2.64806
		5.55	3.34119	2.64765
		5.55333	3.34673	2.64605
		5.55667	3.34792	2.64775
		5.56	3.35351	2.65228
		5.56333	3.34858	2.64918
		5.56667	3.35105	2.64642
		5.57	3.35163	2.65042
		5.57333	3.34615	2.65105
		5.57667	3.34981	2.64995
		5.58	3.3474	2.65286
		5.58333	3.34897	2.64787
		5.58667	3.34833	2.65228
		5.59	3.35147	2.64851
		5.59333	3.35012	2.64991
		5.59667	3.35287	2.64833
		5.6	3.35395	2.65043
		5.60333	3.35001	2.65002
		5.60667	3.35164	2.65187
		5.61	3.352	2.65498
		5.61333	3.35236	2.64917
		5.61667	3.35204	2.6537
		5.62	3.35616	2.6519
		5.62333	3.35513	2.65121
		5.62667	3.35343	2.65404
		5.63	3.351	2.65465
		5.63333	3.35147	2.64993
		5.63667	3.35332	2.65477
		5.64	3.35311	2.65603
		5.64333	3.35563	2.651
		5.64667	3.3535	2.65433
		5.65	3.35606	2.64979
		5.65333	3.35419	2.651
		5.65667	3.35913	2.65238
		5.66	3.35342	2.652
		5.66333	3.35596	2.65452
		5.66667	3.35501	2.65506
		5.67	3.35936	2.65428
		5.67333	3.35762	2.65514
		5.67667	3.35966	2.65684
		5.68	3.35781	2.65418
		5.68333	3.35749	2.65808
		5.68667	3.34927	2.65734
		5.69	3.35748	2.65688
		5.69333	3.35537	2.66063
		5.69667	3.3552	2.65628
		5.7	3.36068	2.65851
		5.70333	3.35838	2.65439
		5.70667	3.36173	2.6575
		5.71	3.35554	2.65775
		5.71333	3.35832	2.65969
		5.71667	3.35624	2.65663
		5.72	3.35933	2.65957
		5.72333	3.35923	2.65563
		5.72667	3.36051	2.65825
		5.73	3.35933	2.65851
		5.73333	3.35542	2.65808
		5.73667	3.3626	2.65915
		5.74	3.35487	2.65713
		5.74333	3.35799	2.65948
		5.74667	3.35964	2.65863
		5.75	3.35875	2.66133
		5.75333	3.36873	2.66008
		5.75667	3.36195	2.66167
		5.76	3.36171	2.65852
		5.76333	3.36109	2.65894
		5.76667	3.35599	2.65779
		5.77	3.36098	2.65923
		5.77333	3.35932	2.6624
		5.77667	3.36222	2.66065
		5.78	3.368	2.65887
		5.78333	3.36248	2.658
		5.78667	3.3601	2.66163
		5.79	3.36595	2.6661
		5.79333	3.36249	2.66148
		5.79667	3.36566	2.65965
		5.8	3.36688	2.65935
		5.80333	3.36576	2.65675
		5.80667	3.36472	2.66233
		5.81	3.36421	2.6605
		5.81333	3.36433	2.66458
		5.81667	3.36336	2.66355
		5.82	3.36789	2.66152
		5.82333	3.36538	2.65909
		5.82667	3.3729	2.66573
		5.83	3.36773	2.66717
		5.83333	3.36751	2.66484
		5.83667	3.3677	2.66479
		5.84	3.36927	2.66345
		5.84333	3.37439	2.66254
		5.84667	3.36687	2.66945
		5.85	3.3693	2.66359
		5.85333	3.36531	2.66418
		5.85667	3.36921	2.66719
		5.86	3.36711	2.66487
		5.86333	3.36957	2.66456
		5.86667	3.36639	2.66154
		5.87	3.36869	2.66626
		5.87333	3.36892	2.66508
		5.87667	3.36676	2.66541
		5.88	3.371	2.66548
		5.88333	3.368	2.66843
		5.88667	3.36608	2.6681
		5.89	3.36904	2.67127
		5.89333	3.36722	2.66626
		5.89667	3.36762	2.66283
		5.9	3.37026	2.66297
		5.90333	3.36997	2.66519
		5.90667	3.36747	2.66872
		5.91	3.37038	2.67204
		5.91333	3.37185	2.66735
		5.91667	3.37119	2.66852
		5.92	3.37066	2.66758
		5.92333	3.37188	2.66927
		5.92667	3.36952	2.66893
		5.93	3.37632	2.66696
		5.93333	3.36834	2.66705
		5.93667	3.3721	2.67125
		5.94	3.3689	2.66462
		5.94333	3.37223	2.6648
		5.94667	3.37471	2.66789
		5.95	3.37452	2.67014
		5.95333	3.37552	2.67058
		5.95667	3.37329	2.66833
		5.96	3.37532	2.6713
		5.96333	3.37704	2.67352
		5.96667	3.37463	2.6684
		5.97	3.37439	2.6689
		5.97333	3.37696	2.67003
		5.97667	3.37486	2.66996
		5.98	3.37263	2.66928
		5.98333	3.37552	2.66935
		5.98667	3.37703	2.67316
		5.99	3.37391	2.67024
		5.99333	3.37663	2.66759
		5.99667	3.37732	2.66875
		6	3.37833	2.66549
		6.00333	3.37828	2.66776
		6.00667	3.37733	2.67194
		6.01	3.37924	2.6769
		6.01333	3.37308	2.67386
		6.01667	3.37744	2.6792
		6.02	3.3766	2.67148
		6.02333	3.3749	2.67429
		6.02667	3.38233	2.6732
		6.03	3.37935	2.67589
		6.03333	3.37836	2.67445
		6.03667	3.37943	2.6746
		6.04	3.37672	2.67929
		6.04333	3.37968	2.67111
		6.04667	3.37756	2.67321
		6.05	3.37836	2.67614
		6.05333	3.37778	2.67439
		6.05667	3.38231	2.67439
		6.06	3.37588	2.6728
		6.06333	3.38312	2.6789
		6.06667	3.37613	2.67998
		6.07	3.3842	2.66886
		6.07333	3.38297	2.67533
		6.07667	3.38235	2.67436
		6.08	3.38008	2.67447
		6.08333	3.38112	2.67708
		6.08667	3.38493	2.67973
		6.09	3.3818	2.67807
		6.09333	3.38553	2.67407
		6.09667	3.38266	2.67872
		6.1	3.38163	2.67998
		6.10333	3.38455	2.67665
		6.10667	3.38667	2.67496
		6.11	3.38189	2.6765
		6.11333	3.38087	2.67538
		6.11667	3.38116	2.67873
		6.12	3.38521	2.67823
		6.12333	3.38068	2.68017
		6.12667	3.38434	2.67829
		6.13	3.38509	2.67859
		6.13333	3.38208	2.6754
		6.13667	3.3788	2.68255
		6.14	3.38423	2.67955
		6.14333	3.38332	2.67966
		6.14667	3.3853	2.67821
		6.15	3.39019	2.68337
		6.15333	3.38279	2.67892
		6.15667	3.38056	2.68267
		6.16	3.38175	2.67893
		6.16333	3.38364	2.67896
		6.16667	3.38288	2.68131
		6.17	3.38581	2.68088
		6.17333	3.38712	2.67889
		6.17667	3.38245	2.68463
		6.18	3.38963	2.68151
		6.18333	3.38593	2.68283
		6.18667	3.38931	2.68275
		6.19	3.39201	2.68305
		6.19333	3.38495	2.67889
		6.19667	3.38844	2.68173
		6.2	3.38978	2.67792
		6.20333	3.39098	2.68229
		6.20667	3.39132	2.67951
		6.21	3.39147	2.68663
		6.21333	3.39012	2.68679
		6.21667	3.38971	2.68541
		6.22	3.38928	2.68087
		6.22333	3.39315	2.68262
		6.22667	3.38618	2.68833
		6.23	3.3887	2.68708
		6.23333	3.39052	2.68307
		6.23667	3.38824	2.68402
		6.24	3.39336	2.6862
		6.24333	3.3894	2.68605
		6.24667	3.39552	2.68552
		6.25	3.38764	2.68923
		6.25333	3.39161	2.69029
		6.25667	3.38834	2.68763
		6.26	3.38624	2.6807
		6.26333	3.39266	2.68568
		6.26667	3.39505	2.68893
		6.27	3.39736	2.68386
		6.27333	3.39124	2.6875
		6.27667	3.39284	2.68442
		6.28	3.39163	2.68585
		6.28333	3.39112	2.68905
		6.28667	3.39173	2.68661
		6.29	3.39232	2.68656
		6.29333	3.39578	2.68442
		6.29667	3.39538	2.6898
		6.3	3.39733	2.68168
		6.30333	3.39546	2.68858
		6.30667	3.39346	2.69034
		6.31	3.39742	2.68574
		6.31333	3.39184	2.68847
		6.31667	3.39708	2.68735
		6.32	3.39758	2.68497
		6.32333	3.3925	2.68868
		6.32667	3.39731	2.68565
		6.33	3.40006	2.69073
		6.33333	3.39528	2.68869
		6.33667	3.39872	2.68753
		6.34	3.39292	2.69217
		6.34333	3.39641	2.68858
		6.34667	3.40184	2.68905
		6.35	3.39791	2.68928
		6.35333	3.39849	2.69321
		6.35667	3.39654	2.69242
		6.36	3.39679	2.68964
		6.36333	3.39664	2.69321
		6.36667	3.40192	2.68913
		6.37	3.39769	2.69294
		6.37333	3.39566	2.69125
		6.37667	3.40008	2.69092
		6.38	3.39529	2.69202
		6.38333	3.39627	2.69588
		6.38667	3.39908	2.68587
		6.39	3.39516	2.69081
		6.39333	3.39876	2.69591
		6.39667	3.39476	2.68945
		6.4	3.39932	2.69325
		6.40333	3.39958	2.68934
		6.40667	3.39503	2.69243
		6.41	3.39985	2.69076
		6.41333	3.39663	2.68875
		6.41667	3.39855	2.69116
		6.42	3.40037	2.69385
		6.42333	3.39975	2.69976
		6.42667	3.40205	2.69695
		6.43	3.40265	2.69148
		6.43333	3.40405	2.69206
		6.43667	3.40259	2.68612
		6.44	3.40191	2.69151
		6.44333	3.40336	2.69599
		6.44667	3.41005	2.69533
		6.45	3.39846	2.69522
		6.45333	3.40176	2.69036
		6.45667	3.40079	2.69908
		6.46	3.39814	2.69318
		6.46333	3.40272	2.69694
		6.46667	3.40151	2.69384
		6.47	3.4034	2.69111
		6.47333	3.40435	2.69451
		6.47667	3.40403	2.6958
		6.48	3.3995	2.69286
		6.48333	3.3998	2.69771
		6.48667	3.39534	2.69602
		6.49	3.40412	2.69332
		6.49333	3.40627	2.70072
		6.49667	3.40338	2.70077
		6.5	3.40213	2.69598
		6.50333	3.40729	2.69537
		6.50667	3.40652	2.69602
		6.51	3.40094	2.69808
		6.51333	3.40228	2.69365
		6.51667	3.40575	2.69726
		6.52	3.40695	2.6985
		6.52333	3.40358	2.69976
		6.52667	3.4027	2.7038
		6.53	3.40475	2.69863
		6.53333	3.40567	2.70215
		6.53667	3.40426	2.69837
		6.54	3.40699	2.69945
		6.54333	3.40592	2.69949
		6.54667	3.40369	2.69766
		6.55	3.40976	2.69782
		6.55333	3.40291	2.69824
		6.55667	3.41008	2.70067
		6.56	3.41295	2.69942
		6.56333	3.40779	2.70316
		6.56667	3.40796	2.69729
		6.57	3.40877	2.70009
		6.57333	3.40762	2.70437
		6.57667	3.40735	2.69923
		6.58	3.40477	2.70047
		6.58333	3.4096	2.70222
		6.58667	3.40817	2.69855
		6.59	3.40759	2.7014
		6.59333	3.41118	2.7048
		6.59667	3.40986	2.70155
		6.6	3.41448	2.69789
		6.60333	3.41139	2.69734
		6.60667	3.40777	2.70267
		6.61	3.41156	2.69722
		6.61333	3.40943	2.70156
		6.61667	3.41326	2.69933
		6.62	3.41565	2.70383
		6.62333	3.41643	2.70356
		6.62667	3.40592	2.70183
		6.63	3.4085	2.70416
		6.63333	3.41625	2.70435
		6.63667	3.41308	2.70555
		6.64	3.41231	2.6993
		6.64333	3.41469	2.69853
		6.64667	3.40879	2.69836
		6.65	3.41281	2.70377
		6.65333	3.41582	2.70332
		6.65667	3.41322	2.70924
[truncated: 34,399 more rows]
