# Supplementary material for: Evolution towards simplicity in bacterial small heat shock protein system
Source: eLife. 2023 Dec 8;12:RP89813. doi: 10.7554/eLife.89813 (PMC10708888; doi:10.7554/eLife.89813)
Supplement: Figure 6—figure supplement 1—source data 1. [file elife-89813-fig6-figsupp1-data1.xlsx]

## Sheet: Arkusz1
	X Volume	10 uM IbpA E.amylovora H67Q D110G 25C1	10 uM IbpA E.amylovora H67Q D110G 44C1	10 uM IbpA E.amylovora H67Q D110G 25C2	10 uM IbpA E.amylovora H67Q D110G 44C2	10 IbpA E.amylovora H67Q D110G 25C3
	0.4	0	0	0	0	0
	0.463	0	0	0	0	0
	0.536	0	0	0	2.34	0
	0.621	0	0.141	0	6.43	0
	0.719	0	0.809	0	6.61	0
	0.833	0	1.91	0	3.42	0
	0.965	0	2.56	0	1.03	0
	1.12	0	2.27	0	0.135	0
	1.29	0	1.51	0	0	0
	1.5	0	1.59	0	0	0
	1.74	0	2.76	0	0	0
	2.01	0	3.14	0	0	0
	2.33	0	2.04	0	0	0
	2.7	0	0.769	0	0	0
	3.12	0	0.253	0	0.448	0
	3.62	0	0.437	0	1.86	0
	4.19	0	0.702	0	3.57	0
	4.85	0	0.93	0.127	4.54	0
	5.61	0	2.08	0.569	5.04	0
	6.5	0	5.44	1.03	6.49	0
	7.53	0	10.3	0.966	9.26	0
	8.72	0	13.9	0.516	11.5	0.0206
	10.1	0.513	14.2	0.628	11.5	0.67
	11.7	3.05	11.9	2.8	9.58	3.55
	13.5	8.06	8.52	7.47	6.94	8.87
	15.7	13.3	5.43	12.6	4.45	14
	18.2	16.1	3.13	15.7	2.56	16.3
	21	16	1.65	15.8	1.31	15.8
	24.4	13.8	0.808	13.6	0.592	13.2
	28.2	10.5	0.37	10.4	0.235	10
	32.7	7.35	0.161	7.2	0.0836	6.92
	37.8	4.69	0.068	4.53	0.0292	4.41
	43.8	2.75	0.0297	2.6	0.012	2.61
	50.7	1.48	0.015	1.35	0.00635	1.42
	58.8	0.726	0.00891	0.631	0.00346	0.707
	68.1	0.319	0.00546	0.257	0.00159	0.316
	78.8	0.124	0.00305	0.0889	0.000516	0.122
	91.3	0.0426	0.00152	0.0253	9.18e-05	0.0385
	106	0.0129	0.000711	0.00577	3.61e-06	0.00903
	122	0.00356	0.000394	0.00104	9.85e-09	0.00138
	142	0.00102	0.000337	0.000613	6.28e-06	0.000113
	164	0.000374	0.00051	0.00179	6.42e-05	5.68e-05
	190	0.000346	0.00115	0.00423	0.000318	0.000398
	220	0.00078	0.00266	0.00797	0.00106	0.00145
	255	0.00195	0.00533	0.013	0.00276	0.00367
	295	0.00471	0.00908	0.0198	0.006	0.00734
	342	0.0103	0.0136	0.029	0.0106	0.0127
	396	0.0193	0.0179	0.0399	0.0149	0.0196
	459	0.0307	0.0209	0.0504	0.0161	0.0274
	531	0.0434	0.0224	0.0592	0.0133	0.0354
	615	0.0573	0.0222	0.0666	0.0083	0.044
	712	0.0693	0.0197	0.0705	0.00405	0.0517
	825	0.0735	0.0145	0.0657	0.00156	0.0546
	955	0.0674	0.0082	0.051	0.000383	0.0509
	1110	0.0554	0.0032	0.0321	2.71e-05	0.0428
	1280	0.0442	0.000627	0.0165	0	0.0345
	1480	0.0386	0	0.00938	0	0.03
	1720	0.0422	0	0.0109	0	0.0331
	1990	0.0523	0	0.0165	0	0.0412
	2300	0.0613	8.88e-05	0.023	0	0.0493
	2670	0.0673	0.000418	0.0301	0	0.0566
	3090	0.0744	0.00102	0.0395	2.2e-08	0.0659
	3580	0.0835	0.00169	0.0519	2.92e-07	0.0771
	4150	0.0892	0.00354	0.0684	0.000342	0.0852
	4800	0.0942	0.0101	0.0963	0.00266	0.0921
	5560	0.0744	0.0131	0.091	0.00429	0.0735
	6440	0.0255	0.00554	0.0338	0.00198	0.0253
	7460	0	0	0	0	0
	8630	0	0	0	0	0
	X Volume	10uM IbpA E. coli Q66H G109D 25C1	10uM IbpA E. coli Q66H G109D 44C1	10uM IbpA E. coli Q66H G109D 25C2	10uM IbpA E. coli Q66H G109D 44C2	10uM IbpA E. coli Q66H G109D 25C3
	0.4	0	0	0	0	0
	0.463	0	0	0	0	0
	0.536	0	0	0	0	0
	0.621	0	0	0	0	0
	0.719	0	0	0	0	0
	0.833	0	0	0	0	0
	0.965	0	0	0	0	0
	1.12	0	0	0	0	0
	1.29	0	0	0	0	0
	1.5	0	0	0	0	0
	1.74	0	0	0	0	0
	2.01	0	0	0	0	0
	2.33	0	0	0	0	0
	2.7	0	0	0	0	0
	3.12	0	0	0	0	0
	3.62	0	0.203	0	0	0
	4.19	0	0.666	0	0.0142	0
	4.85	0.218	0.954	0	0.127	0
	5.61	1.36	1.05	0	0.408	0.162
	6.5	3.38	1.45	0	0.877	0.56
	7.53	4.64	3.4	0	2.38	0.881
	8.72	4.15	8.08	0	6.43	0.981
	10.1	2.73	13.6	0	12.2	1.05
	11.7	1.86	16.4	0.172	16.5	1.39
	13.5	2.48	15.6	1.22	17.2	2.63
	15.7	4.56	12.8	3.91	14.9	5.19
	18.2	7.32	9.41	7.91	11.3	8.47
	21	9.76	6.5	11.7	7.68	11.3
	24.4	11.1	4.26	14	4.72	13
	28.2	11	2.64	14.2	2.64	13
	32.7	9.76	1.52	12.8	1.34	11.7
	37.8	7.98	0.784	10.5	0.622	9.49
	43.8	6.07	0.351	7.99	0.263	7.12
	50.7	4.34	0.134	5.69	0.102	4.97
	58.8	2.93	0.0448	3.81	0.0385	3.26
	68.1	1.87	0.013	2.42	0.017	2.02
	78.8	1.13	0.00296	1.46	0.0106	1.19
	91.3	0.651	0.000623	0.838	0.00831	0.676
	106	0.352	0.000229	0.456	0.0066	0.372
	122	0.179	0.000328	0.235	0.00515	0.198
	142	0.0846	0.000644	0.115	0.00428	0.101
	164	0.0379	0.00112	0.0527	0.00395	0.0478
	190	0.0161	0.00176	0.0218	0.00393	0.0203
	220	0.00572	0.00254	0.00671	0.00386	0.00696
	255	0.00128	0.00356	0.00102	0.00352	0.00156
	295	0.000112	0.00535	0	0.00306	0.000159
	342	0	0.00846	0	0.00281	0
	396	0	0.0121	0	0.00286	0
	459	0	0.014	0	0.003	0
	531	0	0.0131	0	0.00312	0
	615	0	0.0108	0	0.00333	0
	712	0	0.00861	0	0.00358	0
	825	0	0.00639	0	0.00367	0
	955	0	0.00417	0	0.00361	0
	1110	0	0.00266	0	0.00361	0
	1280	0	0.00163	0	0.00383	0
	1480	0.000214	0.000797	0	0.00441	0
	1720	0.00149	0.000294	7.44e-05	0.00563	0
	1990	0.0043	0.000575	0.00141	0.00675	0.000784
	2300	0.00765	0.00222	0.00787	0.00663	0.00435
	2670	0.00992	0.00508	0.0236	0.0059	0.0117
	3090	0.0117	0.00849	0.0499	0.00609	0.0224
	3580	0.0153	0.0113	0.0773	0.00752	0.0327
	4150	0.0206	0.0134	0.094	0.00963	0.0386
	4800	0.027	0.0177	0.103	0.0123	0.0417
	5560	0.0238	0.0168	0.0818	0.0108	0.0327
	6440	0.0085	0.00635	0.0279	0.00387	0.0111
	7460	0	0	0	0	0
	8630	0	0	0	0	0
