# Supplementary material for: Evolution towards simplicity in bacterial small heat shock protein system
Source: eLife. 2023 Dec 8;12:RP89813. doi: 10.7554/eLife.89813 (PMC10708888; doi:10.7554/eLife.89813)
Supplement: Figure 6—source data 1. [file elife-89813-fig6-data1.xlsx]

## Sheet: Arkusz1
	Luciferase activity (repeat 1)	Luciferase activity (repeat 2)	Luciferase activity (repeat 3)
No sHsp	24288826	29419732	26391209
IbpA E.coli	61963758	75461936	71672520
IbpA E.coli Q66H G109D	151110240	149878216	123906136
IbpA E. Amylovora	140231144	122967564	133923140
IbpA E. Amylovora H67Q D110G	24964864	20345731	18362889
IbpA + IbpB E.coli (3:7)	152564496	154971512	129282908
native	151040760	164396256	135189808
