# Supplementary material for: Evolution towards simplicity in bacterial small heat shock protein system
Source: eLife. 2023 Dec 8;12:RP89813. doi: 10.7554/eLife.89813 (PMC10708888; doi:10.7554/eLife.89813)
Supplement: Figure 6—source data 2. [file elife-89813-fig6-data2.xlsx]

## Sheet: Arkusz1
		Response [nm]
	Time [min]	AE.coli	A E.coli Q66H G109D
	0	-0.07141	-0.04448
	0.003333	-0.07107	-0.04094
	0.006667	-0.07091	-0.04437
	0.01	-0.07288	-0.03757
	0.013333	-0.07478	-0.04153
	0.016667	-0.07684	-0.0398
	0.02	-0.07279	-0.04511
	0.023333	-0.07436	-0.04265
	0.026667	-0.07367	-0.04383
	0.03	-0.07096	-0.04578
	0.033333	-0.0715	-0.04234
	0.036667	-0.07615	-0.04021
	0.04	-0.07396	-0.04577
	0.043333	-0.076	-0.04123
	0.046667	-0.07313	-0.04151
	0.05	-0.06895	-0.04185
	0.053333	-0.06933	-0.04406
	0.056667	-0.07058	-0.0403
	0.06	-0.07355	-0.0476
	0.063333	-0.07895	-0.04622
	0.066667	-0.07312	-0.04107
	0.07	-0.07236	-0.04268
	0.073333	-0.07581	-0.04342
	0.076667	-0.07186	-0.04034
	0.08	-0.07243	-0.04231
	0.083333	-0.07492	-0.04257
	0.086667	-0.07409	-0.04503
	0.09	-0.07343	-0.04124
	0.093333	-0.07433	-0.04352
	0.096667	-0.07358	-0.04247
	0.1	-0.07524	-0.0445
	0.103333	-0.07568	-0.04175
	0.106667	-0.07215	-0.0372
	0.11	-0.07576	-0.04259
	0.113333	-0.0734	-0.04268
	0.116667	-0.07315	-0.04506
	0.12	-0.07543	-0.04034
	0.123333	-0.07018	-0.045
	0.126667	-0.07332	-0.04611
	0.13	-0.07615	-0.04063
	0.133333	-0.07668	-0.04179
	0.136667	-0.07075	-0.04003
	0.14	-0.07128	-0.04295
	0.143333	-0.07385	-0.04121
	0.146667	-0.07475	-0.04514
	0.15	-0.07771	-0.041
	0.153333	-0.07282	-0.04182
	0.156667	-0.07364	-0.04342
	0.16	-0.07464	-0.04463
	0.163333	-0.07181	-0.0427
	0.166667	-0.07768	-0.04355
	0.17	-0.07279	-0.03777
	0.173333	-0.07337	-0.03964
	0.176667	-0.07309	-0.04071
	0.18	-0.07369	-0.03963
	0.183333	-0.07387	-0.04434
	0.186667	-0.07677	-0.04428
	0.19	-0.07332	-0.04498
	0.193333	-0.07438	-0.04489
	0.196667	-0.07416	-0.04181
	0.2	-0.07253	-0.0417
	0.203333	-0.07111	-0.04442
	0.206667	-0.07445	-0.04281
	0.21	-0.07288	-0.04347
	0.213333	-0.07057	-0.0422
	0.216667	-0.07349	-0.0426
	0.22	-0.07604	-0.04555
	0.223333	-0.07368	-0.04316
	0.226667	-0.07387	-0.04364
	0.23	-0.07185	-0.04629
	0.233333	-0.07892	-0.04669
	0.236667	-0.0737	-0.04281
	0.24	-0.07441	-0.04847
	0.243333	-0.07534	-0.04562
	0.246667	-0.07037	-0.04678
	0.25	-0.07745	-0.04416
	0.253333	-0.07374	-0.04233
	0.256667	-0.07605	-0.04432
	0.26	-0.07025	-0.03973
	0.263333	-0.0769	-0.04477
	0.266667	-0.07635	-0.04467
	0.27	-0.07461	-0.04276
	0.273333	-0.07714	-0.04579
	0.276667	-0.0752	-0.04653
	0.28	-0.07424	-0.04412
	0.283333	-0.07776	-0.04634
	0.286667	-0.07129	-0.04378
	0.29	-0.07627	-0.04276
	0.293333	-0.07485	-0.04328
	0.296667	-0.0791	-0.04487
	0.3	-0.07784	-0.04705
	0.303333	-0.07239	-0.04834
	0.306667	-0.07552	-0.04626
	0.31	-0.07351	-0.04508
	0.313333	-0.07319	-0.04743
	0.316667	-0.07461	-0.04584
	0.32	-0.0779	-0.04136
	0.323333	-0.0772	-0.04702
	0.326667	-0.08042	-0.04366
	0.33	-0.07845	-0.04378
	0.333333	-0.07011	-0.04389
	0.336667	-0.06913	-0.04413
	0.34	-0.07572	-0.04859
	0.343333	-0.07171	-0.04553
	0.346667	-0.08214	-0.04174
	0.35	-0.079	-0.04543
	0.353333	-0.07537	-0.04515
	0.356667	-0.07453	-0.0441
	0.36	-0.07371	-0.04235
	0.363333	-0.07355	-0.04346
	0.366667	-0.07482	-0.04206
	0.37	-0.07523	-0.04189
	0.373333	-0.077	-0.04711
	0.376667	-0.07461	-0.04655
	0.38	-0.07662	-0.04305
	0.383333	-0.07484	-0.04669
	0.386667	-0.07556	-0.04181
	0.39	-0.07112	-0.04547
	0.393333	-0.07662	-0.04254
	0.396667	-0.07379	-0.04301
	0.4	-0.07313	-0.04736
	0.403333	-0.07782	-0.04543
	0.406667	-0.07749	-0.04755
	0.41	-0.0761	-0.04336
	0.413333	-0.07435	-0.04444
	0.416667	-0.07648	-0.04736
	0.42	-0.07693	-0.04865
	0.423333	-0.07499	-0.04779
	0.426667	-0.07602	-0.04695
	0.43	-0.0741	-0.04339
	0.433333	-0.07979	-0.04657
	0.436667	-0.07816	-0.04831
	0.44	-0.07835	-0.04943
	0.443333	-0.07608	-0.04392
	0.446667	-0.07504	-0.04381
	0.45	-0.07644	-0.0431
	0.453333	-0.07511	-0.04406
	0.456667	-0.0729	-0.04656
	0.46	-0.07862	-0.04565
	0.463333	-0.07717	-0.0442
	0.466667	-0.0781	-0.04913
	0.47	-0.07488	-0.04486
	0.473333	-0.07712	-0.04587
	0.476667	-0.07649	-0.04455
	0.48	-0.07465	-0.04519
	0.483333	-0.07806	-0.04574
	0.486667	-0.0755	-0.04123
	0.49	-0.07772	-0.04395
	0.493333	-0.07432	-0.04306
	0.496667	-0.07823	-0.04161
	0.5	-0.07627	-0.048
	0.503333	-0.076	-0.04167
	0.506667	-0.07834	-0.04213
	0.51	-0.07974	-0.04848
	0.513333	-0.07876	-0.04813
	0.516667	-0.07368	-0.04413
	0.52	-0.07624	-0.04778
	0.523333	-0.07443	-0.0455
	0.526667	-0.07693	-0.04427
	0.53	-0.07364	-0.04387
	0.533333	-0.07509	-0.04974
	0.536667	-0.07775	-0.0424
	0.54	-0.07882	-0.04397
	0.543333	-0.07702	-0.04856
	0.546667	-0.07594	-0.04616
	0.55	-0.07915	-0.04934
	0.553333	-0.07369	-0.04925
	0.556667	-0.07435	-0.04874
	0.56	-0.07739	-0.04836
	0.563333	-0.07858	-0.04585
	0.566667	-0.07714	-0.04578
	0.57	-0.08029	-0.0494
	0.573333	-0.0802	-0.04603
	0.576667	-0.07498	-0.04709
	0.58	-0.07722	-0.0453
	0.583333	-0.07722	-0.04199
	0.586667	-0.07607	-0.04716
	0.59	-0.07541	-0.04424
	0.593333	-0.07616	-0.04525
	0.596667	-0.07613	-0.04634
	0.6	-0.07432	-0.04551
	0.603333	-0.07694	-0.04382
	0.606667	-0.0797	-0.04681
	0.61	-0.07913	-0.04459
	0.613333	-0.07339	-0.04633
	0.616667	-0.07508	-0.05078
	0.62	-0.07722	-0.04603
	0.623333	-0.07735	-0.04725
	0.626667	-0.07553	-0.04764
	0.63	-0.07349	-0.04412
	0.633333	-0.07721	-0.04575
	0.636667	-0.07364	-0.0463
	0.64	-0.07752	-0.04485
	0.643333	-0.07635	-0.04581
	0.646667	-0.08043	-0.04769
	0.65	-0.07549	-0.04664
	0.653333	-0.07529	-0.04398
	0.656667	-0.07416	-0.04759
	0.66	-0.07342	-0.04839
	0.663333	-0.07653	-0.04738
	0.666667	-0.08024	-0.04691
	0.67	-0.07553	-0.04941
	0.673333	-0.07635	-0.04965
	0.676667	-0.07961	-0.04703
	0.68	-0.07469	-0.04496
	0.683333	-0.0739	-0.0451
	0.686667	-0.07775	-0.05061
	0.69	-0.07669	-0.04527
	0.693333	-0.07613	-0.04276
	0.696667	-0.07447	-0.04371
	0.7	-0.07487	-0.04885
	0.703333	-0.07784	-0.0481
	0.706667	-0.0738	-0.04696
	0.71	-0.07485	-0.04914
	0.713333	-0.07752	-0.04806
	0.716667	-0.07765	-0.0437
	0.72	-0.07982	-0.04474
	0.723333	-0.07226	-0.04172
	0.726667	-0.07663	-0.04483
	0.73	-0.08	-0.04596
	0.733333	-0.07716	-0.04152
	0.736667	-0.07323	-0.04533
	0.74	-0.07705	-0.04524
	0.743333	-0.07603	-0.04846
	0.746667	-0.07704	-0.04386
	0.75	-0.08179	-0.0476
	0.753333	-0.07484	-0.04806
	0.756667	-0.07633	-0.05016
	0.76	-0.07649	-0.04668
	0.763333	-0.07765	-0.04818
	0.766667	-0.07508	-0.0521
	0.77	-0.07607	-0.04405
	0.773333	-0.07749	-0.04799
	0.776667	-0.07258	-0.04537
	0.78	-0.0807	-0.0502
	0.783333	-0.07977	-0.04532
	0.786667	-0.07839	-0.04397
	0.79	-0.0736	-0.0462
	0.793333	-0.07567	-0.04967
	0.796667	-0.07247	-0.04714
	0.8	-0.08155	-0.04697
	0.803333	-0.077	-0.05233
	0.806667	-0.07775	-0.0514
	0.81	-0.07643	-0.04575
	0.813333	-0.07477	-0.04749
	0.816667	-0.07745	-0.04657
	0.82	-0.07788	-0.04686
	0.823333	-0.07612	-0.05027
	0.826667	-0.07619	-0.04844
	0.83	-0.07959	-0.04349
	0.833333	-0.07841	-0.04493
	0.836667	-0.08001	-0.04615
	0.84	-0.07491	-0.04783
	0.843333	-0.07876	-0.0472
	0.846667	-0.07693	-0.04458
	0.85	-0.07734	-0.04676
	0.853333	-0.0776	-0.04841
	0.856667	-0.07564	-0.04573
	0.86	-0.07943	-0.0449
	0.863333	-0.07809	-0.0471
	0.866667	-0.08193	-0.04727
	0.87	-0.07527	-0.04806
	0.873333	-0.07624	-0.04361
	0.876667	-0.07965	-0.04829
	0.88	-0.07598	-0.05143
	0.883333	-0.08193	-0.05463
	0.886667	-0.07846	-0.05189
	0.89	-0.08071	-0.04767
	0.893333	-0.07964	-0.04992
	0.896667	-0.0769	-0.04361
	0.9	-0.08121	-0.04616
	0.903333	-0.07476	-0.04498
	0.906667	-0.08243	-0.04565
	0.91	-0.07628	-0.05069
	0.913333	-0.07902	-0.04484
	0.916667	-0.07852	-0.04835
	0.92	-0.07894	-0.0458
	0.923333	-0.08641	-0.05081
	0.926667	-0.07652	-0.04751
	0.93	-0.08165	-0.0483
	0.933333	-0.07734	-0.04603
	0.936667	-0.07774	-0.04734
	0.94	-0.08	-0.04139
	0.943333	-0.07581	-0.04675
	0.946667	-0.07503	-0.04632
	0.95	-0.07907	-0.04823
	0.953333	-0.07721	-0.04734
	0.956667	-0.07506	-0.04818
	0.96	-0.07975	-0.04681
	0.963333	-0.07854	-0.04736
	0.966667	-0.08075	-0.05297
	0.97	-0.07797	-0.04404
	0.973333	-0.07547	-0.0455
	0.976667	-0.07938	-0.04915
	0.98	-0.07927	-0.04774
	0.983333	-0.07848	-0.04811
	0.986667	-0.07699	-0.04901
	0.99	-0.07417	-0.05045
	0.993333	-0.07559	-0.05178
	0.996667	-0.0786	-0.04777
	1	0	0
	1.00333	0.028978	0.020936
	1.00667	0.057672	0.047387
	1.01	0.082399	0.0598
	1.01333	0.122471	0.091383
	1.01667	0.153755	0.107498
	1.02	0.186721	0.127122
	1.02333	0.220352	0.147725
	1.02667	0.248712	0.168446
	1.03	0.275312	0.185175
	1.03333	0.304257	0.209481
	1.03667	0.33429	0.225985
	1.04	0.366838	0.245747
	1.04333	0.390392	0.263561
	1.04667	0.417205	0.278849
	1.05	0.441295	0.298081
	1.05333	0.467288	0.318206
	1.05667	0.488528	0.332755
	1.06	0.510981	0.346274
	1.06333	0.532527	0.365302
	1.06667	0.558884	0.374793
	1.07	0.575685	0.394673
	1.07333	0.593062	0.40901
	1.07667	0.61794	0.417884
	1.08	0.631161	0.432235
	1.08333	0.645658	0.443166
	1.08667	0.66726	0.455039
	1.09	0.681935	0.471869
	1.09333	0.698103	0.479871
	1.09667	0.708761	0.488086
	1.1	0.726421	0.503711
	1.10333	0.734992	0.516397
	1.10667	0.751552	0.519902
	1.11	0.761663	0.53394
	1.11333	0.776452	0.542116
	1.11667	0.786409	0.551052
	1.12	0.795383	0.558556
	1.12333	0.809903	0.564596
	1.12667	0.818708	0.577312
	1.13	0.829136	0.583026
	1.13333	0.839328	0.592992
	1.13667	0.851113	0.60045
	1.14	0.857144	0.604482
	1.14333	0.870678	0.609599
	1.14667	0.876777	0.621763
	1.15	0.878193	0.624056
	1.15333	0.890829	0.630008
	1.15667	0.902338	0.640338
	1.16	0.909472	0.643635
	1.16333	0.914486	0.647723
	1.16667	0.925458	0.652952
	1.17	0.924536	0.661001
	1.17333	0.937595	0.663006
	1.17667	0.941456	0.671056
	1.18	0.946723	0.673719
	1.18333	0.955695	0.680103
	1.18667	0.95808	0.681826
	1.19	0.964811	0.690172
	1.19333	0.969151	0.692112
	1.19667	0.976825	0.698099
	1.2	0.984592	0.701072
	1.20333	0.986613	0.702211
	1.20667	0.994088	0.711789
	1.21	0.997002	0.715298
	1.21333	1.00618	0.717265
	1.21667	1.00677	0.72525
	1.22	1.01316	0.725995
	1.22333	1.0182	0.727508
	1.22667	1.02207	0.734491
	1.23	1.02316	0.735958
	1.23333	1.02665	0.738724
	1.23667	1.03654	0.74103
	1.24	1.03906	0.745983
	1.24333	1.03542	0.744307
	1.24667	1.04713	0.750728
	1.25	1.05457	0.75427
	1.25333	1.05261	0.758921
	1.25667	1.05891	0.763485
	1.26	1.06544	0.768026
	1.26333	1.06265	0.768941
	1.26667	1.06798	0.77161
	1.27	1.06861	0.770712
	1.27333	1.07515	0.77467
	1.27667	1.08024	0.776709
	1.28	1.08258	0.778441
	1.28333	1.08762	0.78431
	1.28667	1.08836	0.783715
	1.29	1.09172	0.786697
	1.29333	1.09574	0.788899
	1.29667	1.09728	0.791696
	1.3	1.10019	0.793361
	1.30333	1.10377	0.794616
	1.30667	1.10372	0.797505
	1.31	1.10716	0.797867
	1.31333	1.11133	0.805521
	1.31667	1.11459	0.805492
	1.32	1.11914	0.803317
	1.32333	1.12078	0.805645
	1.32667	1.12582	0.813102
	1.33	1.12239	0.816043
	1.33333	1.13203	0.81718
	1.33667	1.13066	0.81572
	1.34	1.13811	0.820688
	1.34333	1.13284	0.819469
	1.34667	1.14046	0.822995
	1.35	1.13849	0.826686
	1.35333	1.14817	0.827032
	1.35667	1.14392	0.827319
	1.36	1.14637	0.832497
	1.36333	1.14703	0.834692
	1.36667	1.15595	0.833842
	1.37	1.15183	0.832612
	1.37333	1.15587	0.838344
	1.37667	1.15964	0.84095
	1.38	1.16208	0.841102
	1.38333	1.15957	0.842273
	1.38667	1.16569	0.847671
	1.39	1.16946	0.848522
	1.39333	1.16855	0.842903
	1.39667	1.16963	0.851581
	1.4	1.17142	0.848006
	1.40333	1.17245	0.848367
	1.40667	1.17263	0.857118
	1.41	1.17544	0.850775
	1.41333	1.18299	0.854688
	1.41667	1.18347	0.85709
	1.42	1.18664	0.863672
	1.42333	1.18723	0.857659
	1.42667	1.18308	0.860998
	1.43	1.19437	0.8622
	1.43333	1.1905	0.861564
	1.43667	1.19054	0.862984
	1.44	1.19232	0.868295
	1.44333	1.2004	0.864663
	1.44667	1.19746	0.866952
	1.45	1.19951	0.8734
	1.45333	1.20087	0.866153
	1.45667	1.20743	0.875165
	1.46	1.20737	0.876385
	1.46333	1.2063	0.876495
	1.46667	1.20506	0.875603
	1.47	1.21027	0.879002
	1.47333	1.2148	0.877023
	1.47667	1.21693	0.879072
	1.48	1.21537	0.880974
	1.48333	1.21811	0.885424
	1.48667	1.21639	0.883043
	1.49	1.21693	0.886926
	1.49333	1.21931	0.885464
	1.49667	1.22364	0.88349
	1.5	1.22249	0.890556
	1.50333	1.22799	0.889731
	1.50667	1.22569	0.889063
	1.51	1.22711	0.886565
	1.51333	1.22989	0.89616
	1.51667	1.23252	0.897048
	1.52	1.22846	0.896147
	1.52333	1.23653	0.897054
	1.52667	1.23887	0.894544
	1.53	1.24401	0.901995
	1.53333	1.24092	0.900078
	1.53667	1.24144	0.898186
	1.54	1.24256	0.899366
	1.54333	1.24058	0.902698
	1.54667	1.24245	0.901489
	1.55	1.24438	0.903679
	1.55333	1.24987	0.905394
	1.55667	1.24453	0.905548
	1.56	1.24677	0.906985
	1.56333	1.24588	0.90353
	1.56667	1.25524	0.909969
	1.57	1.25253	0.908479
	1.57333	1.25785	0.908415
	1.57667	1.25707	0.910778
	1.58	1.25411	0.912546
	1.58333	1.25587	0.915615
	1.58667	1.2568	0.912305
	1.59	1.2562	0.911886
	1.59333	1.26325	0.915389
	1.59667	1.26257	0.921387
	1.6	1.26351	0.919114
	1.60333	1.25841	0.922829
	1.60667	1.26774	0.921846
	1.61	1.26999	0.920964
	1.61333	1.27004	0.921429
	1.61667	1.27434	0.920669
	1.62	1.271	0.925233
	1.62333	1.27157	0.919256
	1.62667	1.27747	0.923661
	1.63	1.27743	0.923545
	1.63333	1.27759	0.930079
	1.63667	1.2822	0.927439
	1.64	1.28074	0.921989
	1.64333	1.28042	0.927271
	1.64667	1.28055	0.927845
	1.65	1.27958	0.926918
	1.65333	1.2834	0.933185
	1.65667	1.28309	0.934778
	1.66	1.29086	0.935581
	1.66333	1.28606	0.933244
	1.66667	1.28844	0.932052
	1.67	1.29384	0.934059
	1.67333	1.29001	0.933946
	1.67667	1.29146	0.937695
	1.68	1.29208	0.934906
	1.68333	1.2935	0.939444
	1.68667	1.2906	0.937771
	1.69	1.29875	0.93853
	1.69333	1.29927	0.940495
	1.69667	1.29929	0.937769
	1.7	1.30234	0.941376
	1.70333	1.30047	0.939602
	1.70667	1.30059	0.940324
	1.71	1.30237	0.947808
	1.71333	1.30061	0.944598
	1.71667	1.3018	0.944625
	1.72	1.30306	0.946662
	1.72333	1.30803	0.950577
	1.72667	1.30468	0.938865
	1.73	1.30512	0.951146
	1.73333	1.30926	0.948749
	1.73667	1.30467	0.947981
	1.74	1.31262	0.949467
	1.74333	1.31562	0.95152
	1.74667	1.31075	0.951153
	1.75	1.3123	0.950028
	1.75333	1.31463	0.948682
	1.75667	1.31805	0.954004
	1.76	1.31493	0.947701
	1.76333	1.3161	0.960585
	1.76667	1.31634	0.958127
	1.77	1.31979	0.959757
	1.77333	1.3218	0.956523
	1.77667	1.31965	0.952415
	1.78	1.32602	0.956351
	1.78333	1.32296	0.959314
	1.78667	1.32786	0.958392
	1.79	1.32416	0.95644
	1.79333	1.32896	0.960178
	1.79667	1.32391	0.960962
	1.8	1.32397	0.960291
	1.80333	1.32635	0.964139
	1.80667	1.32849	0.957695
	1.81	1.33091	0.961385
	1.81333	1.33094	0.967485
	1.81667	1.33512	0.965506
	1.82	1.33693	0.965415
	1.82333	1.33662	0.965026
	1.82667	1.33211	0.969962
	1.83	1.33941	0.968837
	1.83333	1.33721	0.969119
	1.83667	1.34261	0.968252
	1.84	1.33888	0.966793
	1.84333	1.34243	0.969344
	1.84667	1.3393	0.965354
	1.85	1.34638	0.96935
	1.85333	1.34774	0.968641
	1.85667	1.34593	0.96709
	1.86	1.34321	0.96921
	1.86333	1.3447	0.971375
	1.86667	1.34574	0.970395
	1.87	1.34631	0.970693
	1.87333	1.34302	0.971458
	1.87667	1.34925	0.972564
	1.88	1.35087	0.973055
	1.88333	1.35068	0.976851
	1.88667	1.35367	0.975328
	1.89	1.35285	0.974721
	1.89333	1.3529	0.979034
	1.89667	1.35105	0.981734
	1.9	1.35499	0.97848
	1.90333	1.35418	0.978194
	1.90667	1.35328	0.978893
	1.91	1.35739	0.980604
	1.91333	1.35645	0.977103
	1.91667	1.35769	0.980566
	1.92	1.35888	0.983095
	1.92333	1.35868	0.984508
	1.92667	1.35968	0.98391
	1.93	1.36151	0.98311
	1.93333	1.36034	0.985634
	1.93667	1.36544	0.983077
	1.94	1.36428	0.983629
	1.94333	1.36682	0.987835
	1.94667	1.36875	0.983263
	1.95	1.37135	0.991355
	1.95333	1.36728	0.980199
	1.95667	1.36193	0.987668
	1.96	1.37098	0.988654
	1.96333	1.37088	0.990406
	1.96667	1.3749	0.987326
	1.97	1.36714	0.989218
	1.97333	1.37018	0.988601
	1.97667	1.3762	0.991994
	1.98	1.37459	0.988159
	1.98333	1.37594	0.990892
	1.98667	1.37724	0.990354
	1.99	1.3768	0.989097
	1.99333	1.37522	0.988362
	1.99667	1.3782	0.994589
	2	1.37993	0.993617
	2.00333	1.38042	0.998892
	2.00667	1.3806	0.991799
	2.01	1.37969	0.9931
	2.01333	1.37807	0.991065
	2.01667	1.38768	0.999617
	2.02	1.3831	0.998493
	2.02333	1.38641	0.997542
	2.02667	1.38695	0.999077
	2.03	1.38939	0.996369
	2.03333	1.38678	0.996171
	2.03667	1.38643	1.00107
	2.04	1.38502	0.997356
	2.04333	1.39271	0.999635
	2.04667	1.39344	0.999165
	2.05	1.39292	1.00191
	2.05333	1.39162	0.999965
	2.05667	1.39306	1.00237
	2.06	1.38896	1.00174
	2.06333	1.39066	1.00565
	2.06667	1.39836	1.00307
	2.07	1.39956	1.01025
	2.07333	1.40181	1.00334
	2.07667	1.3942	1.00693
	2.08	1.39588	1.00569
	2.08333	1.39616	1.00563
	2.08667	1.3972	1.00608
	2.09	1.40139	1.00623
	2.09333	1.40441	1.00148
	2.09667	1.40114	1.00733
	2.1	1.40125	1.00948
	2.10333	1.39886	1.00319
	2.10667	1.40156	1.00897
	2.11	1.40425	1.01158
	2.11333	1.40621	1.00883
	2.11667	1.40322	1.01241
	2.12	1.40718	1.01086
	2.12333	1.40742	1.01086
	2.12667	1.40632	1.01071
	2.13	1.40566	1.01058
	2.13333	1.40705	1.01244
	2.13667	1.40636	1.00935
	2.14	1.40784	1.01189
	2.14333	1.41368	1.01354
	2.14667	1.41197	1.01505
	2.15	1.41024	1.01245
	2.15333	1.41284	1.01206
	2.15667	1.41451	1.01216
	2.16	1.41127	1.01284
	2.16333	1.41386	1.02167
	2.16667	1.41051	1.0111
	2.17	1.41917	1.01341
	2.17333	1.41318	1.01713
	2.17667	1.4165	1.01479
	2.18	1.4095	1.01554
	2.18333	1.42175	1.01431
	2.18667	1.42017	1.01321
	2.19	1.4222	1.01618
	2.19333	1.42075	1.01903
	2.19667	1.42225	1.01955
	2.2	1.4221	1.01803
	2.20333	1.4206	1.01526
	2.20667	1.42177	1.01992
	2.21	1.42013	1.02138
	2.21333	1.42353	1.02196
	2.21667	1.42424	1.02157
	2.22	1.42144	1.01876
	2.22333	1.42369	1.0228
	2.22667	1.42797	1.02505
	2.23	1.42496	1.023
	2.23333	1.42741	1.0228
	2.23667	1.4285	1.02295
	2.24	1.43162	1.02221
	2.24333	1.42764	1.0243
	2.24667	1.43339	1.02963
	2.25	1.43116	1.0204
	2.25333	1.43306	1.02297
	2.25667	1.43366	1.02673
	2.26	1.43232	1.03071
	2.26333	1.42938	1.02704
	2.26667	1.43241	1.02653
	2.27	1.43615	1.02737
	2.27333	1.4325	1.02965
	2.27667	1.43898	1.02587
	2.28	1.43792	1.0324
	2.28333	1.43671	1.0327
	2.28667	1.43899	1.02732
	2.29	1.44039	1.03096
	2.29333	1.43879	1.03068
	2.29667	1.43633	1.02789
	2.3	1.44332	1.02826
	2.30333	1.43836	1.02906
	2.30667	1.44358	1.03024
	2.31	1.44414	1.03093
	2.31333	1.44342	1.03484
	2.31667	1.44615	1.03395
	2.32	1.44533	1.03192
	2.32333	1.44457	1.03157
	2.32667	1.44997	1.03597
	2.33	1.44568	1.03477
	2.33333	1.44695	1.03562
	2.33667	1.44575	1.03341
	2.34	1.44734	1.03556
	2.34333	1.44692	1.03435
	2.34667	1.44956	1.03504
	2.35	1.45253	1.04153
	2.35333	1.45279	1.03882
	2.35667	1.44988	1.03347
	2.36	1.45226	1.03954
	2.36333	1.45197	1.03976
	2.36667	1.45334	1.04174
	2.37	1.45415	1.03735
	2.37333	1.45656	1.03809
	2.37667	1.45344	1.03653
	2.38	1.45433	1.04008
	2.38333	1.45519	1.04145
	2.38667	1.45771	1.03765
	2.39	1.45964	1.04419
	2.39333	1.46218	1.03975
	2.39667	1.4544	1.04094
	2.4	1.45861	1.04249
	2.40333	1.45772	1.03824
	2.40667	1.46145	1.03877
	2.41	1.45808	1.04325
	2.41333	1.4579	1.04131
	2.41667	1.46315	1.0426
	2.42	1.46291	1.03954
	2.42333	1.46006	1.04186
	2.42667	1.46435	1.04811
	2.43	1.46237	1.04415
	2.43333	1.46495	1.04307
	2.43667	1.46755	1.04921
	2.44	1.46825	1.04575
	2.44333	1.46408	1.0413
	2.44667	1.46252	1.04802
	2.45	1.46883	1.04352
	2.45333	1.46755	1.04129
	2.45667	1.46787	1.04685
	2.46	1.47272	1.04872
	2.46333	1.47011	1.04557
	2.46667	1.46939	1.04643
	2.47	1.47032	1.04928
	2.47333	1.47034	1.05012
	2.47667	1.47159	1.04929
	2.48	1.46962	1.04885
	2.48333	1.4715	1.0475
	2.48667	1.47344	1.05
	2.49	1.46816	1.05246
	2.49333	1.47581	1.0451
	2.49667	1.4719	1.04973
	2.5	1.478	1.04845
	2.50333	1.47696	1.04994
	2.50667	1.48031	1.05014
	2.51	1.4786	1.05318
	2.51333	1.48266	1.05082
	2.51667	1.48035	1.05055
	2.52	1.47671	1.05028
	2.52333	1.47989	1.05239
	2.52667	1.48247	1.05465
	2.53	1.47822	1.05132
	2.53333	1.48302	1.05377
	2.53667	1.48319	1.05446
	2.54	1.48315	1.05045
	2.54333	1.48421	1.05123
	2.54667	1.48198	1.05325
	2.55	1.4839	1.05268
	2.55333	1.48453	1.05455
	2.55667	1.48577	1.05549
	2.56	1.48066	1.06284
	2.56333	1.48073	1.05502
	2.56667	1.48365	1.05711
	2.57	1.4875	1.05478
	2.57333	1.48644	1.0599
	2.57667	1.48981	1.05419
	2.58	1.48938	1.05716
	2.58333	1.49005	1.05875
	2.58667	1.49259	1.05538
	2.59	1.49025	1.05631
	2.59333	1.49218	1.05608
	2.59667	1.48835	1.05747
	2.6	1.49349	1.05911
	2.60333	1.49373	1.05709
	2.60667	1.48992	1.05618
	2.61	1.49161	1.06038
	2.61333	1.49282	1.0617
	2.61667	1.49387	1.06174
	2.62	1.49244	1.0582
	2.62333	1.49348	1.06511
	2.62667	1.49324	1.05998
	2.63	1.49683	1.05699
	2.63333	1.49148	1.06207
	2.63667	1.49578	1.05957
	2.64	1.49727	1.06293
	2.64333	1.5002	1.06603
	2.64667	1.50233	1.06444
	2.65	1.50094	1.06082
	2.65333	1.49531	1.0638
	2.65667	1.50113	1.06737
	2.66	1.50059	1.06234
	2.66333	1.50127	1.06904
	2.66667	1.50123	1.06335
	2.67	1.50094	1.06485
	2.67333	1.50455	1.06583
	2.67667	1.50737	1.0693
	2.68	1.50673	1.06641
	2.68333	1.50467	1.06594
	2.68667	1.50804	1.06572
	2.69	1.50758	1.06811
	2.69333	1.50774	1.06503
	2.69667	1.50749	1.06629
	2.7	1.50716	1.06901
	2.70333	1.50728	1.06286
	2.70667	1.50815	1.06873
	2.71	1.50686	1.0684
	2.71333	1.51436	1.067
	2.71667	1.51247	1.066
	2.72	1.51435	1.06942
	2.72333	1.51084	1.06864
	2.72667	1.50857	1.06649
	2.73	1.51284	1.06571
	2.73333	1.51322	1.06971
	2.73667	1.51074	1.07228
	2.74	1.51481	1.06915
	2.74333	1.51371	1.06761
	2.74667	1.51177	1.06847
	2.75	1.51394	1.07375
	2.75333	1.51472	1.07431
	2.75667	1.51307	1.07369
	2.76	1.51329	1.07383
	2.76333	1.51937	1.07129
	2.76667	1.51879	1.07101
	2.77	1.51682	1.07378
	2.77333	1.51842	1.0733
	2.77667	1.52041	1.0731
	2.78	1.5234	1.07176
	2.78333	1.51792	1.07539
	2.78667	1.52016	1.07022
	2.79	1.52064	1.07101
	2.79333	1.52187	1.07602
	2.79667	1.5226	1.07311
	2.8	1.52425	1.07425
	2.80333	1.52843	1.07113
	2.80667	1.52349	1.073
	2.81	1.52573	1.07728
	2.81333	1.52005	1.07723
	2.81667	1.52602	1.07602
	2.82	1.52104	1.07249
	2.82333	1.52795	1.07781
	2.82667	1.52384	1.07692
	2.83	1.52137	1.06998
	2.83333	1.52994	1.07864
	2.83667	1.52464	1.07819
	2.84	1.52968	1.08026
	2.84333	1.53231	1.07902
	2.84667	1.52723	1.07713
	2.85	1.53166	1.0809
	2.85333	1.53175	1.08034
	2.85667	1.52979	1.07874
	2.86	1.531	1.07767
	2.86333	1.53097	1.08073
	2.86667	1.53276	1.07839
	2.87	1.53774	1.08018
	2.87333	1.53259	1.07978
	2.87667	1.53766	1.08068
	2.88	1.53202	1.08239
	2.88333	1.53659	1.0855
	2.88667	1.53813	1.08231
	2.89	1.52746	1.08087
	2.89333	1.53679	1.08035
	2.89667	1.53919	1.08001
	2.9	1.53277	1.08186
	2.90333	1.53689	1.08175
	2.90667	1.53727	1.08201
	2.91	1.53703	1.08191
	2.91333	1.5366	1.08256
	2.91667	1.53391	1.08207
	2.92	1.54462	1.08104
	2.92333	1.53691	1.07917
	2.92667	1.53929	1.08589
	2.93	1.5417	1.08673
	2.93333	1.53952	1.08371
	2.93667	1.54113	1.08362
	2.94	1.53918	1.08517
	2.94333	1.54149	1.0897
	2.94667	1.5424	1.08541
	2.95	1.54207	1.08699
	2.95333	1.54461	1.08661
	2.95667	1.54156	1.08728
	2.96	1.55168	1.08726
	2.96333	1.54557	1.08751
	2.96667	1.54216	1.08705
	2.97	1.54827	1.08584
	2.97333	1.54622	1.08628
	2.97667	1.54401	1.08708
	2.98	1.54952	1.0881
	2.98333	1.55087	1.08822
	2.98667	1.55238	1.08543
	2.99	1.55283	1.09033
	2.99333	1.54893	1.08715
	2.99667	1.54746	1.09111
	3	1.54523	1.08661
	3.00333	1.54888	1.08781
	3.00667	1.55094	1.09036
	3.01	1.55408	1.08404
	3.01333	1.54809	1.0949
	3.01667	1.55067	1.09055
	3.02	1.5494	1.09045
	3.02333	1.55492	1.09007
	3.02667	1.55297	1.08761
	3.03	1.5532	1.08598
	3.03333	1.55463	1.09272
	3.03667	1.55272	1.08874
	3.04	1.56062	1.08971
	3.04333	1.55	1.09287
	3.04667	1.55366	1.09335
	3.05	1.55538	1.09197
	3.05333	1.55813	1.09519
	3.05667	1.55471	1.09125
	3.06	1.55787	1.09259
	3.06333	1.55975	1.09334
	3.06667	1.56061	1.09285
	3.07	1.56024	1.09237
	3.07333	1.56127	1.09047
	3.07667	1.55796	1.09216
	3.08	1.55649	1.09047
	3.08333	1.55838	1.09427
	3.08667	1.56248	1.09589
	3.09	1.56173	1.09507
	3.09333	1.56118	1.09313
	3.09667	1.56035	1.09534
	3.1	1.56252	1.09455
	3.10333	1.56122	1.09565
	3.10667	1.56562	1.09168
	3.11	1.5584	1.09183
	3.11333	1.56483	1.09504
	3.11667	1.56396	1.0989
	3.12	1.56334	1.09424
	3.12333	1.56575	1.09816
	3.12667	1.56715	1.10038
	3.13	1.56654	1.09399
	3.13333	1.56371	1.09413
	3.13667	1.57065	1.09869
	3.14	1.56744	1.09646
	3.14333	1.56919	1.10075
	3.14667	1.56429	1.09839
	3.15	1.5711	1.09719
	3.15333	1.56963	1.09794
	3.15667	1.56933	1.1002
	3.16	1.57346	1.10092
	3.16333	1.57281	1.09838
	3.16667	1.57022	1.10002
	3.17	1.57432	1.10151
	3.17333	1.56662	1.10166
	3.17667	1.57206	1.09781
	3.18	1.57444	1.10127
	3.18333	1.57439	1.10215
	3.18667	1.5717	1.10084
	3.19	1.57269	1.10076
	3.19333	1.58202	1.10364
	3.19667	1.57523	1.09651
	3.2	1.57679	1.10084
	3.20333	1.58083	1.10365
	3.20667	1.577	1.10426
	3.21	1.57757	1.09678
	3.21333	1.57462	1.10282
	3.21667	1.57623	1.10556
	3.22	1.5804	1.10042
	3.22333	1.58092	1.10441
	3.22667	1.57489	1.10251
	3.23	1.58241	1.10237
	3.23333	1.58182	1.10303
	3.23667	1.58195	1.10043
	3.24	1.58303	1.09957
	3.24333	1.58255	1.10015
	3.24667	1.58261	1.10015
	3.25	1.58205	1.10108
	3.25333	1.58163	1.10733
	3.25667	1.58312	1.10395
	3.26	1.57708	1.10629
	3.26333	1.5838	1.10861
	3.26667	1.58892	1.1073
	3.27	1.58297	1.10399
	3.27333	1.58672	1.10372
	3.27667	1.58516	1.10311
	3.28	1.58435	1.10406
	3.28333	1.58548	1.10897
	3.28667	1.588	1.10348
	3.29	1.588	1.10602
	3.29333	1.58518	1.10887
	3.29667	1.5895	1.10243
	3.3	1.58777	1.10618
	3.30333	1.59036	1.10918
	3.30667	1.59141	1.10661
	3.31	1.58782	1.11014
	3.31333	1.58969	1.10468
	3.31667	1.58876	1.10688
	3.32	1.59094	1.1074
	3.32333	1.58733	1.11113
	3.32667	1.5922	1.10915
	3.33	1.59385	1.10673
	3.33333	1.59309	1.10678
	3.33667	1.59102	1.10695
	3.34	1.59649	1.10557
	3.34333	1.59356	1.10685
	3.34667	1.59163	1.10807
	3.35	1.59604	1.11119
	3.35333	1.59157	1.10985
	3.35667	1.59865	1.11002
	3.36	1.59566	1.1108
	3.36333	1.59588	1.11222
	3.36667	1.59457	1.10936
	3.37	1.59638	1.11277
	3.37333	1.59699	1.10658
	3.37667	1.59366	1.10672
	3.38	1.59906	1.11521
	3.38333	1.60272	1.11059
	3.38667	1.59875	1.1123
	3.39	1.59839	1.11003
	3.39333	1.59827	1.11459
	3.39667	1.59717	1.11264
	3.4	1.60097	1.11195
	3.40333	1.60474	1.11445
	3.40667	1.59926	1.11463
	3.41	1.60109	1.10932
	3.41333	1.59832	1.11091
	3.41667	1.5997	1.11335
	3.42	1.60124	1.1143
	3.42333	1.60028	1.11633
	3.42667	1.60026	1.11202
	3.43	1.60289	1.11541
	3.43333	1.60227	1.11467
	3.43667	1.60276	1.11389
	3.44	1.60788	1.11429
	3.44333	1.60646	1.11451
	3.44667	1.60336	1.11714
	3.45	1.60574	1.11393
	3.45333	1.60858	1.11846
	3.45667	1.60646	1.11952
	3.46	1.60444	1.11748
	3.46333	1.60475	1.11962
	3.46667	1.6079	1.11368
	3.47	1.61125	1.11961
	3.47333	1.60948	1.12055
	3.47667	1.61047	1.11886
	3.48	1.6107	1.11363
	3.48333	1.60877	1.12085
	3.48667	1.6098	1.11953
	3.49	1.60841	1.12059
	3.49333	1.60924	1.11513
	3.49667	1.61363	1.11753
	3.5	1.60852	1.11821
	3.50333	1.61513	1.11468
	3.50667	1.60867	1.1204
	3.51	1.61162	1.11976
	3.51333	1.60979	1.11296
	3.51667	1.61296	1.12364
	3.52	1.6167	1.12047
	3.52333	1.61578	1.12013
	3.52667	1.61045	1.12053
	3.53	1.61272	1.11564
	3.53333	1.61208	1.11802
	3.53667	1.61488	1.11808
	3.54	1.61654	1.12035
	3.54333	1.61749	1.12015
	3.54667	1.61409	1.11614
	3.55	1.61299	1.12095
	3.55333	1.61305	1.11761
	3.55667	1.61769	1.12152
	3.56	1.61478	1.12155
	3.56333	1.62139	1.12006
	3.56667	1.6204	1.11886
	3.57	1.62039	1.12477
	3.57333	1.6191	1.12001
	3.57667	1.62324	1.12518
	3.58	1.62026	1.12108
	3.58333	1.62241	1.11815
	3.58667	1.62221	1.12276
	3.59	1.62276	1.12635
	3.59333	1.62271	1.11899
	3.59667	1.61973	1.1261
	3.6	1.62497	1.12247
	3.60333	1.62884	1.12156
	3.60667	1.6194	1.1206
	3.61	1.62263	1.12256
	3.61333	1.62371	1.12451
	3.61667	1.62519	1.12432
	3.62	1.62071	1.12989
	3.62333	1.62654	1.12345
	3.62667	1.62493	1.12244
	3.63	1.62874	1.12092
	3.63333	1.62573	1.12681
	3.63667	1.63015	1.12141
	3.64	1.62859	1.12707
	3.64333	1.62954	1.12822
	3.64667	1.62273	1.12682
	3.65	1.62703	1.12962
	3.65333	1.62977	1.12286
	3.65667	1.6284	1.12294
	3.66	1.62797	1.12495
	3.66333	1.6326	1.12621
	3.66667	1.62667	1.12313
	3.67	1.63101	1.12433
	3.67333	1.63275	1.12693
	3.67667	1.63621	1.12634
	3.68	1.62989	1.12439
	3.68333	1.63187	1.12939
	3.68667	1.63383	1.12662
	3.69	1.63561	1.12451
	3.69333	1.63231	1.12432
	3.69667	1.63181	1.12695
	3.7	1.63201	1.12821
	3.70333	1.63645	1.1209
	3.70667	1.63569	1.13
	3.71	1.63459	1.12684
	3.71333	1.63716	1.13166
	3.71667	1.63923	1.12805
	3.72	1.63436	1.12562
	3.72333	1.63331	1.12704
	3.72667	1.63599	1.12896
	3.73	1.63921	1.12889
	3.73333	1.63252	1.12759
	3.73667	1.63946	1.12929
	3.74	1.63998	1.12851
	3.74333	1.63714	1.13291
	3.74667	1.64352	1.13135
	3.75	1.63928	1.12738
	3.75333	1.64322	1.1295
	3.75667	1.63757	1.12593
	3.76	1.63825	1.13134
	3.76333	1.63867	1.12861
	3.76667	1.63669	1.13166
	3.77	1.63957	1.12835
	3.77333	1.63793	1.13097
	3.77667	1.64	1.13264
	3.78	1.64138	1.13245
	3.78333	1.64622	1.12949
	3.78667	1.63999	1.13576
	3.79	1.64161	1.13312
	3.79333	1.64297	1.13062
	3.79667	1.64348	1.13332
	3.8	1.64599	1.13377
	3.80333	1.64583	1.13427
	3.80667	1.64844	1.13645
	3.81	1.64541	1.13375
	3.81333	1.64814	1.13515
	3.81667	1.64584	1.1325
	3.82	1.64592	1.13263
	3.82333	1.64543	1.13583
	3.82667	1.64655	1.13477
	3.83	1.64864	1.1314
	3.83333	1.65289	1.13336
	3.83667	1.64578	1.13101
	3.84	1.64725	1.13025
	3.84333	1.64956	1.12967
	3.84667	1.64775	1.13556
	3.85	1.64894	1.1338
	3.85333	1.65154	1.13763
	3.85667	1.64924	1.13501
	3.86	1.65063	1.12909
	3.86333	1.65113	1.13979
	3.86667	1.65123	1.12878
	3.87	1.65117	1.13614
	3.87333	1.65441	1.13702
	3.87667	1.65116	1.13703
	3.88	1.65267	1.13337
	3.88333	1.65339	1.13553
	3.88667	1.65171	1.13461
	3.89	1.65494	1.13472
	3.89333	1.65581	1.13714
	3.89667	1.65186	1.12748
	3.9	1.6547	1.1394
	3.90333	1.65129	1.13971
	3.90667	1.65469	1.1373
	3.91	1.65582	1.13609
	3.91333	1.6583	1.13938
	3.91667	1.66088	1.13956
	3.92	1.65401	1.14377
	3.92333	1.65918	1.13647
	3.92667	1.65881	1.13835
	3.93	1.65502	1.13565
	3.93333	1.65638	1.13797
	3.93667	1.65786	1.13969
	3.94	1.65738	1.1374
	3.94333	1.66265	1.13588
	3.94667	1.66131	1.13796
	3.95	1.65918	1.14027
	3.95333	1.65825	1.14063
	3.95667	1.6623	1.14146
	3.96	1.66563	1.13622
	3.96333	1.66385	1.1376
	3.96667	1.66005	1.13908
	3.97	1.65754	1.14274
	3.97333	1.66125	1.14049
	3.97667	1.66871	1.14277
	3.98	1.65958	1.14483
	3.98333	1.6626	1.13691
	3.98667	1.65946	1.14101
	3.99	1.66429	1.14185
	3.99333	1.66443	1.13875
	3.99667	1.66739	1.13995
	4	1.66581	1.13817
	4.00333	1.66683	1.1406
	4.00667	1.66378	1.13949
	4.01	1.66265	1.1425
	4.01333	1.66501	1.1414
	4.01667	1.66387	1.14165
	4.02	1.66634	1.14246
	4.02333	1.67015	1.13886
	4.02667	1.66712	1.14492
	4.03	1.66585	1.14577
	4.03333	1.67072	1.14488
	4.03667	1.67321	1.14275
	4.04	1.67056	1.1432
	4.04333	1.67349	1.14528
	4.04667	1.67141	1.14214
	4.05	1.67071	1.1467
	4.05333	1.67329	1.14187
	4.05667	1.66884	1.1454
	4.06	1.67474	1.14329
	4.06333	1.67309	1.1462
	4.06667	1.6714	1.14324
	4.07	1.66635	1.14686
	4.07333	1.67476	1.14606
	4.07667	1.66809	1.14518
	4.08	1.66891	1.14845
	4.08333	1.67435	1.14393
	4.08667	1.67621	1.14112
	4.09	1.67592	1.14745
	4.09333	1.67284	1.14509
	4.09667	1.67365	1.14578
	4.1	1.67697	1.14617
	4.10333	1.67253	1.14712
	4.10667	1.67446	1.14703
	4.11	1.67947	1.14823
	4.11333	1.67975	1.14556
	4.11667	1.6774	1.14415
	4.12	1.67573	1.14483
	4.12333	1.67847	1.14664
	4.12667	1.67464	1.14548
	4.13	1.67478	1.14654
	4.13333	1.6806	1.14647
	4.13667	1.6803	1.14699
	4.14	1.68059	1.14468
	4.14333	1.6827	1.14872
	4.14667	1.68086	1.15396
	4.15	1.68118	1.14733
	4.15333	1.67701	1.14939
	4.15667	1.67839	1.14705
	4.16	1.68018	1.14989
	4.16333	1.679	1.14854
	4.16667	1.68224	1.15041
	4.17	1.68048	1.14938
	4.17333	1.68283	1.14916
	4.17667	1.68543	1.14922
	4.18	1.68437	1.15401
	4.18333	1.67994	1.14677
	4.18667	1.68586	1.14969
	4.19	1.68181	1.15054
	4.19333	1.67952	1.14762
	4.19667	1.68039	1.14946
	4.2	1.68353	1.14904
	4.20333	1.68036	1.14919
	4.20667	1.68608	1.15144
	4.21	1.68596	1.15003
	4.21333	1.68691	1.1482
	4.21667	1.68375	1.15157
	4.22	1.68971	1.1485
	4.22333	1.68582	1.15399
	4.22667	1.68623	1.15461
	4.23	1.68595	1.14963
	4.23333	1.68709	1.15161
	4.23667	1.69185	1.15159
	4.24	1.69011	1.15199
	4.24333	1.68946	1.15071
	4.24667	1.68962	1.1498
	4.25	1.68765	1.15377
	4.25333	1.68929	1.1491
	4.25667	1.69143	1.15059
	4.26	1.69133	1.15355
	4.26333	1.68899	1.15276
	4.26667	1.69133	1.14773
	4.27	1.68795	1.1519
	4.27333	1.69491	1.14992
	4.27667	1.69147	1.15229
	4.28	1.69817	1.15036
	4.28333	1.69382	1.14979
	4.28667	1.69263	1.15272
	4.29	1.69202	1.15008
	4.29333	1.69343	1.15625
	4.29667	1.69314	1.15102
	4.3	1.69577	1.15322
	4.30333	1.69337	1.15489
	4.30667	1.69207	1.15636
	4.31	1.69187	1.15511
	4.31333	1.69629	1.15748
	4.31667	1.69494	1.14801
	4.32	1.69755	1.15299
	4.32333	1.69551	1.15745
	4.32667	1.69547	1.15553
	4.33	1.69655	1.1544
	4.33333	1.69546	1.15616
	4.33667	1.6993	1.15169
	4.34	1.70139	1.15287
	4.34333	1.69894	1.15766
	4.34667	1.69979	1.1556
	4.35	1.69808	1.15535
	4.35333	1.69939	1.15434
	4.35667	1.70223	1.15567
	4.36	1.70098	1.15397
	4.36333	1.69848	1.15361
	4.36667	1.70131	1.15756
	4.37	1.70017	1.15959
	4.37333	1.70153	1.15799
	4.37667	1.70162	1.15745
	4.38	1.70158	1.15675
	4.38333	1.70313	1.15828
	4.38667	1.70114	1.15844
	4.39	1.70401	1.15938
	4.39333	1.70109	1.15919
	4.39667	1.70601	1.15825
	4.4	1.70534	1.15561
	4.40333	1.70347	1.158
	4.40667	1.70616	1.16017
	4.41	1.70409	1.16164
	4.41333	1.70685	1.1572
	4.41667	1.70803	1.15835
	4.42	1.70402	1.15466
	4.42333	1.70806	1.15586
	4.42667	1.70434	1.15875
	4.43	1.7043	1.1561
	4.43333	1.70833	1.15806
	4.43667	1.70872	1.15551
	4.44	1.7076	1.16156
	4.44333	1.70589	1.15796
	4.44667	1.70938	1.16158
	4.45	1.71164	1.15745
	4.45333	1.70666	1.15803
	4.45667	1.70616	1.16036
	4.46	1.71323	1.15961
	4.46333	1.7064	1.15906
	4.46667	1.70929	1.16271
	4.47	1.71179	1.16
	4.47333	1.7142	1.15928
	4.47667	1.71088	1.1635
	4.48	1.71032	1.15774
	4.48333	1.7147	1.16436
	4.48667	1.70956	1.16031
	4.49	1.7125	1.1618
	4.49333	1.71666	1.15914
	4.49667	1.71361	1.16446
	4.5	1.71111	1.16387
	4.50333	1.71417	1.15903
	4.50667	1.71279	1.16454
	4.51	1.71296	1.16443
	4.51333	1.71689	1.16209
	4.51667	1.71389	1.15798
	4.52	1.71311	1.16154
	4.52333	1.71378	1.16338
	4.52667	1.71545	1.16086
	4.53	1.71281	1.16044
	4.53333	1.71437	1.16431
	4.53667	1.72123	1.16016
	4.54	1.7186	1.16197
	4.54333	1.71504	1.16195
	4.54667	1.71589	1.16298
	4.55	1.71528	1.16248
	4.55333	1.71592	1.15977
	4.55667	1.71884	1.16213
	4.56	1.72285	1.16646
	4.56333	1.71769	1.16192
	4.56667	1.72083	1.16533
	4.57	1.72092	1.16609
	4.57333	1.71911	1.16567
	4.57667	1.71932	1.16377
	4.58	1.72222	1.16438
	4.58333	1.72141	1.16282
	4.58667	1.71659	1.1634
	4.59	1.72082	1.16137
	4.59333	1.72327	1.16518
	4.59667	1.72319	1.16318
	4.6	1.724	1.16457
	4.60333	1.72021	1.16853
	4.60667	1.72457	1.16917
	4.61	1.71959	1.16924
	4.61333	1.72402	1.15985
	4.61667	1.729	1.16521
	4.62	1.72804	1.16595
	4.62333	1.72448	1.16745
	4.62667	1.72519	1.16596
	4.63	1.72443	1.16689
	4.63333	1.72742	1.16325
	4.63667	1.72472	1.16598
	4.64	1.72649	1.16716
	4.64333	1.72903	1.16553
	4.64667	1.73017	1.16629
	4.65	1.72974	1.16927
	4.65333	1.72914	1.16753
	4.65667	1.7279	1.17045
	4.66	1.72562	1.16951
	4.66333	1.72957	1.17221
	4.66667	1.72922	1.16309
	4.67	1.72523	1.16736
	4.67333	1.73264	1.16462
	4.67667	1.73367	1.16803
	4.68	1.73197	1.16557
	4.68333	1.73003	1.17186
	4.68667	1.72982	1.17211
	4.69	1.73019	1.16358
	4.69333	1.7296	1.16833
	4.69667	1.73326	1.16879
	4.7	1.73117	1.16692
	4.70333	1.72937	1.16721
	4.70667	1.73179	1.16736
	4.71	1.73011	1.17012
	4.71333	1.73153	1.17076
	4.71667	1.72717	1.16603
	4.72	1.73437	1.17066
	4.72333	1.73448	1.16752
	4.72667	1.73467	1.17254
	4.73	1.73267	1.1704
	4.73333	1.7355	1.1714
	4.73667	1.73745	1.17327
	4.74	1.73311	1.17298
	4.74333	1.73371	1.17282
	4.74667	1.73546	1.17199
	4.75	1.73496	1.17113
	4.75333	1.73977	1.17189
	4.75667	1.73903	1.16824
	4.76	1.7351	1.17599
	4.76333	1.73678	1.17316
	4.76667	1.73489	1.17503
	4.77	1.73596	1.17177
	4.77333	1.73689	1.16882
	4.77667	1.73474	1.17636
	4.78	1.73448	1.17038
	4.78333	1.73932	1.17341
	4.78667	1.7384	1.17291
	4.79	1.73832	1.16918
	4.79333	1.7378	1.17463
	4.79667	1.73636	1.16906
	4.8	1.7368	1.17655
	4.80333	1.74523	1.17487
	4.80667	1.73806	1.17162
	4.81	1.74077	1.17396
	4.81333	1.7345	1.17272
	4.81667	1.73719	1.17518
	4.82	1.73893	1.17448
	4.82333	1.7414	1.17566
	4.82667	1.74517	1.17616
	4.83	1.743	1.1738
	4.83333	1.74203	1.17345
	4.83667	1.74461	1.17347
	4.84	1.74458	1.17379
	4.84333	1.74356	1.17362
	4.84667	1.74707	1.17549
	4.85	1.74562	1.17202
	4.85333	1.74116	1.16959
	4.85667	1.74791	1.17288
	4.86	1.75114	1.17534
	4.86333	1.73821	1.1701
	4.86667	1.74497	1.17084
	4.87	1.74403	1.1745
	4.87333	1.74294	1.17458
	4.87667	1.74318	1.17505
	4.88	1.74304	1.17605
	4.88333	1.74659	1.1752
	4.88667	1.74334	1.1769
	4.89	1.74922	1.17802
	4.89333	1.74863	1.17578
	4.89667	1.74918	1.17433
	4.9	1.74512	1.17929
	4.90333	1.74969	1.17886
	4.90667	1.74425	1.17763
	4.91	1.74996	1.1762
	4.91333	1.74855	1.17727
	4.91667	1.74839	1.17113
	4.92	1.75176	1.17535
	4.92333	1.75035	1.17913
	4.92667	1.74896	1.18045
	4.93	1.74978	1.17787
	4.93333	1.74902	1.18057
	4.93667	1.75234	1.17701
	4.94	1.75576	1.17534
	4.94333	1.74722	1.18123
	4.94667	1.75157	1.17891
	4.95	1.75301	1.17485
	4.95333	1.75203	1.17874
	4.95667	1.7538	1.17756
	4.96	1.75186	1.17636
	4.96333	1.75128	1.17865
	4.96667	1.7541	1.17839
	4.97	1.75793	1.17876
	4.97333	1.75702	1.17795
	4.97667	1.75606	1.1778
	4.98	1.75325	1.17706
	4.98333	1.75415	1.17965
	4.98667	1.75615	1.17598
	4.99	1.75748	1.17805
	4.99333	1.75242	1.17794
	4.99667	1.7567	1.17566
	5	1.75562	1.17773
	5.00333	1.75488	1.18048
	5.00667	1.76082	1.18285
	5.01	1.7624	1.17437
	5.01333	1.75693	1.18221
	5.01667	1.75591	1.18128
	5.02	1.75841	1.1819
	5.02333	1.75785	1.17886
	5.02667	1.75489	1.18647
	5.03	1.76135	1.17897
	5.03333	1.75934	1.18072
	5.03667	1.75998	1.18448
	5.04	1.75724	1.18129
	5.04333	1.76107	1.18371
	5.04667	1.76258	1.18271
	5.05	1.75565	1.18046
	5.05333	1.76177	1.18089
	5.05667	1.7567	1.17722
	5.06	1.76294	1.18045
	5.06333	1.75931	1.18116
	5.06667	1.76124	1.18561
	5.07	1.76007	1.18159
	5.07333	1.76344	1.18233
	5.07667	1.76445	1.18452
	5.08	1.75866	1.18258
	5.08333	1.7623	1.18118
	5.08667	1.76449	1.18415
	5.09	1.76359	1.18191
	5.09333	1.76225	1.17929
	5.09667	1.76633	1.18535
	5.1	1.76294	1.18362
	5.10333	1.76394	1.18179
	5.10667	1.76452	1.18185
	5.11	1.7655	1.185
	5.11333	1.76897	1.18268
	5.11667	1.7672	1.17984
	5.12	1.76477	1.18108
	5.12333	1.76517	1.18655
	5.12667	1.76747	1.18263
	5.13	1.77083	1.1854
	5.13333	1.76747	1.18073
	5.13667	1.76533	1.18189
	5.14	1.76806	1.18428
	5.14333	1.76712	1.18265
	5.14667	1.76889	1.18055
	5.15	1.76664	1.18297
	5.15333	1.7721	1.18252
	5.15667	1.76828	1.18777
	5.16	1.76597	1.18197
	5.16333	1.76869	1.18434
	5.16667	1.77183	1.18396
	5.17	1.7721	1.18236
	5.17333	1.7723	1.18292
	5.17667	1.77635	1.18851
	5.18	1.77331	1.1862
	5.18333	1.77296	1.18505
	5.18667	1.77031	1.18429
	5.19	1.7711	1.18359
	5.19333	1.77705	1.18573
	5.19667	1.77192	1.18743
	5.2	1.77503	1.18773
	5.20333	1.77325	1.18665
	5.20667	1.77367	1.18162
	5.21	1.77369	1.17961
	5.21333	1.77563	1.18535
	5.21667	1.77349	1.18535
	5.22	1.77788	1.18504
	5.22333	1.7755	1.18471
	5.22667	1.77272	1.18448
	5.23	1.76883	1.18738
	5.23333	1.77424	1.18398
	5.23667	1.77588	1.18539
	5.24	1.77274	1.18517
	5.24333	1.77496	1.18723
	5.24667	1.77924	1.18447
	5.25	1.77726	1.18616
	5.25333	1.78107	1.18537
	5.25667	1.77414	1.1946
	5.26	1.77902	1.18561
	5.26333	1.77677	1.18876
	5.26667	1.78182	1.19055
	5.27	1.78193	1.18368
	5.27333	1.77751	1.1855
	5.27667	1.77694	1.18673
	5.28	1.77989	1.1861
	5.28333	1.78007	1.18623
	5.28667	1.78171	1.18119
	5.29	1.78028	1.18663
	5.29333	1.77831	1.18734
	5.29667	1.78	1.18509
	5.3	1.7819	1.1885
	5.30333	1.78141	1.18642
	5.30667	1.78102	1.18631
	5.31	1.78397	1.19485
	5.31333	1.78334	1.1887
	5.31667	1.78323	1.18622
	5.32	1.78415	1.18925
	5.32333	1.77934	1.18551
	5.32667	1.78567	1.18914
	5.33	1.78343	1.19352
	5.33333	1.78568	1.1914
	5.33667	1.78259	1.19005
	5.34	1.78166	1.18938
	5.34333	1.78187	1.18649
	5.34667	1.7861	1.188
	5.35	1.78038	1.18723
	5.35333	1.78333	1.18922
	5.35667	1.78165	1.18941
	5.36	1.78362	1.18951
	5.36333	1.78663	1.19255
	5.36667	1.78265	1.18951
	5.37	1.78689	1.1881
	5.37333	1.78946	1.19121
	5.37667	1.78523	1.19175
	5.38	1.78876	1.19231
	5.38333	1.79051	1.19197
	5.38667	1.78885	1.19243
	5.39	1.78984	1.18646
	5.39333	1.78719	1.19279
	5.39667	1.78715	1.19422
	5.4	1.78886	1.18933
	5.40333	1.78932	1.19436
	5.40667	1.78855	1.19691
	5.41	1.79203	1.19047
	5.41333	1.79459	1.19118
	5.41667	1.79081	1.19322
	5.42	1.79074	1.1931
	5.42333	1.78881	1.19278
	5.42667	1.79063	1.19502
	5.43	1.78985	1.18972
	5.43333	1.7858	1.19134
	5.43667	1.79468	1.19138
	5.44	1.79196	1.19
	5.44333	1.79223	1.1899
	5.44667	1.79366	1.19362
	5.45	1.79143	1.19171
	5.45333	1.79095	1.18914
	5.45667	1.78947	1.19293
	5.46	1.79461	1.19233
	5.46333	1.79271	1.19495
	5.46667	1.79228	1.19032
	5.47	1.79157	1.1908
	5.47333	1.79316	1.19541
	5.47667	1.79541	1.19344
	5.48	1.79377	1.19517
	5.48333	1.79345	1.1939
	5.48667	1.79504	1.19318
	5.49	1.80019	1.19486
	5.49333	1.79798	1.19373
	5.49667	1.79979	1.19363
	5.5	1.79772	1.19448
	5.50333	1.79478	1.1922
	5.50667	1.79905	1.19143
	5.51	1.79852	1.19606
	5.51333	1.79429	1.19391
	5.51667	1.79908	1.1946
	5.52	1.79866	1.19503
	5.52333	1.79914	1.19583
	5.52667	1.79717	1.19771
	5.53	1.79965	1.19647
	5.53333	1.79526	1.19343
	5.53667	1.8028	1.19424
	5.54	1.79934	1.19485
	5.54333	1.79786	1.19404
	5.54667	1.79933	1.19549
	5.55	1.80066	1.19401
	5.55333	1.79899	1.19395
	5.55667	1.79924	1.19395
	5.56	1.80064	1.19717
	5.56333	1.80205	1.19683
	5.56667	1.8034	1.19463
	5.57	1.79785	1.19925
	5.57333	1.8033	1.19752
	5.57667	1.80276	1.19599
	5.58	1.79975	1.19806
	5.58333	1.80403	1.19518
	5.58667	1.80249	1.19529
	5.59	1.80521	1.19832
	5.59333	1.80487	1.19633
	5.59667	1.8057	1.19845
	5.6	1.80383	1.1983
	5.60333	1.80769	1.19926
	5.60667	1.80223	1.19909
	5.61	1.80484	1.19768
	5.61333	1.80682	1.19789
	5.61667	1.81143	1.1985
	5.62	1.80679	1.19685
	5.62333	1.80553	1.19474
	5.62667	1.80635	1.19702
	5.63	1.80361	1.1978
	5.63333	1.80139	1.19584
	5.63667	1.80691	1.19676
	5.64	1.80584	1.19514
	5.64333	1.80978	1.19849
	5.64667	1.80703	1.20068
	5.65	1.80926	1.20205
	5.65333	1.80838	1.1986
	5.65667	1.81051	1.20295
	5.66	1.81267	1.20089
	5.66333	1.80771	1.19945
	5.66667	1.80979	1.19846
	5.67	1.80924	1.1982
	5.67333	1.80788	1.20288
	5.67667	1.80862	1.20061
	5.68	1.8073	1.19962
	5.68333	1.81231	1.19968
	5.68667	1.80903	1.19998
	5.69	1.81398	1.20073
	5.69333	1.81214	1.1999
	5.69667	1.81068	1.19984
	5.7	1.80854	1.20138
	5.70333	1.80767	1.20505
	5.70667	1.80819	1.2005
	5.71	1.81357	1.20207
	5.71333	1.8134	1.19898
	5.71667	1.81632	1.20389
	5.72	1.81429	1.20423
	5.72333	1.81437	1.20169
	5.72667	1.81517	1.20012
	5.73	1.81201	1.19459
	5.73333	1.81303	1.2017
	5.73667	1.81866	1.2017
	5.74	1.81439	1.20068
	5.74333	1.81306	1.20208
	5.74667	1.81097	1.20043
	5.75	1.81118	1.19944
	5.75333	1.81467	1.20405
	5.75667	1.8115	1.20246
	5.76	1.81625	1.20141
	5.76333	1.81151	1.20117
	5.76667	1.81763	1.20694
	5.77	1.81532	1.2029
	5.77333	1.81904	1.20416
	5.77667	1.8113	1.20046
	5.78	1.81568	1.20451
	5.78333	1.81705	1.2019
	5.78667	1.81291	1.20294
	5.79	1.81649	1.2033
	5.79333	1.81656	1.19983
	5.79667	1.81919	1.20412
	5.8	1.81565	1.20497
	5.80333	1.81667	1.20376
	5.80667	1.81855	1.20264
	5.81	1.81872	1.20145
	5.81333	1.81866	1.20391
	5.81667	1.81672	1.20511
	5.82	1.82652	1.20383
	5.82333	1.82075	1.20059
	5.82667	1.82193	1.20061
	5.83	1.82598	1.20367
	5.83333	1.82309	1.20363
	5.83667	1.82447	1.2017
	5.84	1.82187	1.2031
	5.84333	1.82219	1.20307
	5.84667	1.82161	1.20413
	5.85	1.82424	1.20419
	5.85333	1.82273	1.20556
	5.85667	1.82041	1.2016
	5.86	1.82394	1.20415
	5.86333	1.82293	1.20008
	5.86667	1.82388	1.20179
	5.87	1.82372	1.20217
	5.87333	1.8242	1.20572
	5.87667	1.82139	1.20642
	5.88	1.82467	1.20217
	5.88333	1.82221	1.20097
	5.88667	1.82397	1.20729
	5.89	1.82883	1.20425
	5.89333	1.82378	1.20344
	5.89667	1.82534	1.20474
	5.9	1.82431	1.20704
	5.90333	1.8244	1.20176
	5.90667	1.82269	1.20148
	5.91	1.82688	1.20445
	5.91333	1.8262	1.20636
	5.91667	1.82582	1.20732
	5.92	1.83054	1.21061
	5.92333	1.82652	1.2095
	5.92667	1.82576	1.20788
	5.93	1.82715	1.20486
	5.93333	1.82765	1.20941
	5.93667	1.82721	1.2061
	5.94	1.82932	1.20463
	5.94333	1.8295	1.20657
	5.94667	1.82984	1.20739
	5.95	1.83075	1.20817
	5.95333	1.82861	1.20874
	5.95667	1.83037	1.20506
	5.96	1.83362	1.20725
	5.96333	1.82977	1.20824
	5.96667	1.82875	1.20713
	5.97	1.83043	1.20722
	5.97333	1.82731	1.207
	5.97667	1.83028	1.20719
	5.98	1.83452	1.20732
	5.98333	1.83339	1.20927
	5.98667	1.83032	1.20659
	5.99	1.83397	1.21006
	5.99333	1.83538	1.20653
	5.99667	1.83399	1.20886
	6	1.83351	1.20764
	6.00333	1.83596	1.20654
	6.00667	1.82951	1.21064
	6.01	1.83018	1.20626
	6.01333	1.83419	1.2101
	6.01667	1.83269	1.20527
	6.02	1.83366	1.21054
	6.02333	1.83326	1.21005
	6.02667	1.83303	1.20863
	6.03	1.8359	1.212
	6.03333	1.83382	1.21282
	6.03667	1.83249	1.20569
	6.04	1.83485	1.20535
	6.04333	1.8335	1.20785
	6.04667	1.83689	1.20455
	6.05	1.84088	1.20788
	6.05333	1.83395	1.2093
	6.05667	1.83703	1.20782
	6.06	1.83712	1.20844
	6.06333	1.83999	1.21027
	6.06667	1.8365	1.20857
	6.07	1.83615	1.2051
	6.07333	1.83327	1.21165
	6.07667	1.83618	1.21222
	6.08	1.84081	1.21048
	6.08333	1.83609	1.20817
	6.08667	1.83866	1.20735
	6.09	1.83658	1.20859
	6.09333	1.83831	1.21198
	6.09667	1.84084	1.21006
	6.1	1.8421	1.21317
	6.10333	1.83538	1.2105
	6.10667	1.84085	1.21043
	6.11	1.83857	1.21048
	6.11333	1.84145	1.20883
	6.11667	1.84361	1.20993
	6.12	1.84228	1.21381
	6.12333	1.83621	1.20752
	6.12667	1.84479	1.211
	6.13	1.84224	1.2137
	6.13333	1.84025	1.2081
	6.13667	1.84227	1.208
	6.14	1.843	1.21332
	6.14333	1.84245	1.20724
	6.14667	1.8384	1.21289
	6.15	1.84276	1.2123
	6.15333	1.83962	1.20215
	6.15667	1.84624	1.20965
	6.16	1.842	1.213
	6.16333	1.84346	1.21212
	6.16667	1.84155	1.21408
	6.17	1.84594	1.21137
	6.17333	1.84509	1.2123
	6.17667	1.84184	1.20992
	6.18	1.84292	1.21505
	6.18333	1.84253	1.21245
	6.18667	1.84515	1.21285
	6.19	1.84318	1.21049
	6.19333	1.84689	1.21008
	6.19667	1.84716	1.21648
	6.2	1.85034	1.2128
	6.20333	1.84747	1.21039
	6.20667	1.84406	1.21318
	6.21	1.85156	1.2118
	6.21333	1.84777	1.21651
	6.21667	1.84607	1.21448
	6.22	1.84949	1.21147
	6.22333	1.84562	1.21563
	6.22667	1.85105	1.21503
	6.23	1.84622	1.21414
	6.23333	1.84684	1.21659
	6.23667	1.84706	1.20949
	6.24	1.84729	1.21442
	6.24333	1.85278	1.21402
	6.24667	1.84223	1.21724
	6.25	1.84969	1.21089
	6.25333	1.85082	1.21179
	6.25667	1.84615	1.21332
	6.26	1.84833	1.21307
	6.26333	1.85068	1.21273
	6.26667	1.85262	1.21276
	6.27	1.85316	1.21005
	6.27333	1.84736	1.21207
	6.27667	1.8483	1.21446
	6.28	1.84817	1.21085
	6.28333	1.84952	1.21575
	6.28667	1.85469	1.21219
	6.29	1.85325	1.21262
	6.29333	1.85214	1.21087
	6.29667	1.85174	1.2139
	6.3	1.85778	1.21655
	6.30333	1.85118	1.21463
	6.30667	1.85489	1.21605
	6.31	1.85212	1.22002
	6.31333	1.85357	1.21678
	6.31667	1.85025	1.21713
	6.32	1.8553	1.21878
	6.32333	1.85428	1.21755
	6.32667	1.85572	1.21713
	6.33	1.85345	1.21077
	6.33333	1.8554	1.21599
	6.33667	1.85332	1.21389
	6.34	1.85734	1.21479
	6.34333	1.85223	1.2146
	6.34667	1.8564	1.21576
	6.35	1.85658	1.21567
	6.35333	1.85255	1.21491
	6.35667	1.85766	1.21767
	6.36	1.85634	1.21632
	6.36333	1.85878	1.21632
	6.36667	1.85844	1.214
	6.37	1.85623	1.21604
	6.37333	1.85621	1.22005
	6.37667	1.85519	1.21666
	6.38	1.85952	1.2165
	6.38333	1.85931	1.2193
	6.38667	1.85704	1.21901
	6.39	1.85698	1.21442
	6.39333	1.85899	1.21963
	6.39667	1.85986	1.21633
	6.4	1.85973	1.21912
	6.40333	1.86069	1.21949
	6.40667	1.85974	1.21618
	6.41	1.86232	1.21964
	6.41333	1.85896	1.21892
	6.41667	1.85807	1.21863
	6.42	1.85669	1.21848
	6.42333	1.86602	1.21946
	6.42667	1.86185	1.21395
	6.43	1.8627	1.21739
	6.43333	1.85656	1.21727
	6.43667	1.86189	1.2199
	6.44	1.86016	1.22274
	6.44333	1.86286	1.21694
	6.44667	1.85843	1.21546
	6.45	1.86186	1.2183
	6.45333	1.86216	1.22155
	6.45667	1.86307	1.21729
	6.46	1.86178	1.21938
	6.46333	1.86457	1.21582
	6.46667	1.86689	1.21848
	6.47	1.86069	1.21838
	6.47333	1.86483	1.21876
	6.47667	1.86474	1.22142
	6.48	1.86703	1.22186
	6.48333	1.86328	1.2204
	6.48667	1.86388	1.22
	6.49	1.86535	1.2186
	6.49333	1.86435	1.21876
	6.49667	1.86476	1.22369
	6.5	1.86648	1.22328
	6.50333	1.86304	1.21705
	6.50667	1.86716	1.22358
	6.51	1.86267	1.21972
	6.51333	1.86606	1.22052
	6.51667	1.86684	1.21955
	6.52	1.8627	1.21627
	6.52333	1.86848	1.21893
	6.52667	1.86841	1.22063
	6.53	1.86773	1.2188
	6.53333	1.8665	1.2187
	6.53667	1.86894	1.22416
	6.54	1.86759	1.21803
	6.54333	1.86961	1.21838
	6.54667	1.86753	1.22268
	6.55	1.86748	1.21931
	6.55333	1.87215	1.2208
	6.55667	1.86828	1.22117
	6.56	1.86907	1.21907
	6.56333	1.87025	1.22123
	6.56667	1.87044	1.21834
	6.57	1.86721	1.22182
	6.57333	1.87321	1.22323
	6.57667	1.87213	1.22117
	6.58	1.87228	1.2203
	6.58333	1.87044	1.21996
	6.58667	1.87098	1.21945
	6.59	1.87398	1.22127
	6.59333	1.87047	1.22394
	6.59667	1.87207	1.22044
	6.6	1.87075	1.22083
	6.60333	1.86918	1.22524
	6.60667	1.87209	1.22176
	6.61	1.87185	1.22291
	6.61333	1.86871	1.22138
	6.61667	1.87299	1.22536
	6.62	1.87123	1.22072
	6.62333	1.8721	1.22098
	6.62667	1.87417	1.21984
	6.63	1.8715	1.2227
	6.63333	1.87019	1.22361
	6.63667	1.8732	1.22221
	6.64	1.87375	1.22204
	6.64333	1.87705	1.22063
	6.64667	1.8737	1.21949
	6.65	1.87196	1.22237
	6.65333	1.87588	1.22552
	6.65667	1.8757	1.22326
[truncated: 34,302 more rows]
