# Supplementary material for: Evolution towards simplicity in bacterial small heat shock protein system
Source: eLife. 2023 Dec 8;12:RP89813. doi: 10.7554/eLife.89813 (PMC10708888; doi:10.7554/eLife.89813)
Supplement: Figure 6—source data 3. [file elife-89813-fig6-data3.xlsx]

## Sheet: Arkusz1
		Response [nm]
	Time [min]	AE.amy	IbpA E.amy H67Q D110G
	0	-0.02255	-0.02288
	0.003333	-0.02336	-0.02241
	0.006667	-0.01986	-0.02391
	0.01	-0.02395	-0.02248
	0.013333	-0.02226	-0.0148
	0.016667	-0.02148	-0.01662
	0.02	-0.0199	-0.02325
	0.023333	-0.02177	-0.02296
	0.026667	-0.02549	-0.02487
	0.03	-0.02067	-0.01817
	0.033333	-0.02408	-0.01914
	0.036667	-0.01547	-0.0206
	0.04	-0.01936	-0.0186
	0.043333	-0.02147	-0.01975
	0.046667	-0.02574	-0.02225
	0.05	-0.02049	-0.02406
	0.053333	-0.01946	-0.02254
	0.056667	-0.01812	-0.0229
	0.06	-0.01857	-0.01766
	0.063333	-0.0241	-0.01828
	0.066667	-0.02221	-0.02454
	0.07	-0.01914	-0.02091
	0.073333	-0.02685	-0.01658
	0.076667	-0.02401	-0.02404
	0.08	-0.02008	-0.02205
	0.083333	-0.02367	-0.02526
	0.086667	-0.02585	-0.02065
	0.09	-0.02115	-0.02235
	0.093333	-0.02309	-0.02859
	0.096667	-0.0227	-0.01935
	0.1	-0.02156	-0.02352
	0.103333	-0.0201	-0.02303
	0.106667	-0.02336	-0.02041
	0.11	-0.0191	-0.02281
	0.113333	-0.02417	-0.0244
	0.116667	-0.02357	-0.02241
	0.12	-0.02467	-0.02374
	0.123333	-0.01976	-0.02395
	0.126667	-0.0231	-0.02303
	0.13	-0.01992	-0.02192
	0.133333	-0.02313	-0.02147
	0.136667	-0.02234	-0.01994
	0.14	-0.02466	-0.02376
	0.143333	-0.02252	-0.02097
	0.146667	-0.0229	-0.0248
	0.15	-0.02171	-0.02471
	0.153333	-0.02183	-0.02381
	0.156667	-0.02321	-0.0197
	0.16	-0.02778	-0.02171
	0.163333	-0.0168	-0.02034
	0.166667	-0.02032	-0.02253
	0.17	-0.02281	-0.02406
	0.173333	-0.02122	-0.02338
	0.176667	-0.02304	-0.01952
	0.18	-0.02424	-0.02103
	0.183333	-0.01913	-0.02136
	0.186667	-0.0247	-0.02648
	0.19	-0.02358	-0.02053
	0.193333	-0.02112	-0.0246
	0.196667	-0.02557	-0.02169
	0.2	-0.02475	-0.02604
	0.203333	-0.02207	-0.0187
	0.206667	-0.01919	-0.0279
	0.21	-0.0241	-0.02319
	0.213333	-0.02658	-0.02258
	0.216667	-0.02448	-0.02426
	0.22	-0.02483	-0.02141
	0.223333	-0.02797	-0.02453
	0.226667	-0.02212	-0.02531
	0.23	-0.02605	-0.02517
	0.233333	-0.02282	-0.01997
	0.236667	-0.02007	-0.02126
	0.24	-0.02076	-0.0202
	0.243333	-0.02112	-0.02393
	0.246667	-0.02326	-0.02275
	0.25	-0.02634	-0.02075
	0.253333	-0.02327	-0.01995
	0.256667	-0.01944	-0.02721
	0.26	-0.02598	-0.02333
	0.263333	-0.01894	-0.02145
	0.266667	-0.02187	-0.02419
	0.27	-0.02548	-0.02431
	0.273333	-0.024	-0.0223
	0.276667	-0.02354	-0.0205
	0.28	-0.02259	-0.02188
	0.283333	-0.0259	-0.02094
	0.286667	-0.02134	-0.02289
	0.29	-0.02328	-0.02038
	0.293333	-0.02242	-0.02688
	0.296667	-0.0241	-0.02091
	0.3	-0.02482	-0.02134
	0.303333	-0.02239	-0.02524
	0.306667	-0.02709	-0.02245
	0.31	-0.02551	-0.02148
	0.313333	-0.02305	-0.02565
	0.316667	-0.02798	-0.02389
	0.32	-0.02164	-0.02413
	0.323333	-0.01901	-0.02263
	0.326667	-0.02127	-0.02402
	0.33	-0.02051	-0.02123
	0.333333	-0.02051	-0.02246
	0.336667	-0.02497	-0.02312
	0.34	-0.01921	-0.02473
	0.343333	-0.02429	-0.02384
	0.346667	-0.02603	-0.02441
	0.35	-0.02156	-0.02536
	0.353333	-0.02189	-0.02039
	0.356667	-0.02226	-0.02256
	0.36	-0.02482	-0.02138
	0.363333	-0.01986	-0.02463
	0.366667	-0.02471	-0.02523
	0.37	-0.02284	-0.02467
	0.373333	-0.02311	-0.02327
	0.376667	-0.02265	-0.02458
	0.38	-0.02554	-0.02186
	0.383333	-0.02354	-0.01997
	0.386667	-0.02651	-0.02139
	0.39	-0.02439	-0.02446
	0.393333	-0.02113	-0.02746
	0.396667	-0.01817	-0.02257
	0.4	-0.02168	-0.02385
	0.403333	-0.02468	-0.02415
	0.406667	-0.01962	-0.02205
	0.41	-0.02391	-0.02514
	0.413333	-0.02377	-0.02164
	0.416667	-0.02237	-0.02419
	0.42	-0.02326	-0.02736
	0.423333	-0.02455	-0.02419
	0.426667	-0.02307	-0.02574
	0.43	-0.02828	-0.02323
	0.433333	-0.02595	-0.02226
	0.436667	-0.02221	-0.02538
	0.44	-0.02674	-0.024
	0.443333	-0.027	-0.02222
	0.446667	-0.02229	-0.02363
	0.45	-0.01709	-0.02257
	0.453333	-0.02362	-0.0228
	0.456667	-0.02778	-0.02508
	0.46	-0.02615	-0.0256
	0.463333	-0.01925	-0.02627
	0.466667	-0.01951	-0.02176
	0.47	-0.02216	-0.02594
	0.473333	-0.02487	-0.02194
	0.476667	-0.01988	-0.01935
	0.48	-0.0158	-0.02539
	0.483333	-0.02184	-0.02446
	0.486667	-0.02278	-0.02274
	0.49	-0.02201	-0.01839
	0.493333	-0.02444	-0.02364
	0.496667	-0.02507	-0.02466
	0.5	-0.02266	-0.02545
	0.503333	-0.02763	-0.02134
	0.506667	-0.0248	-0.02702
	0.51	-0.02275	-0.02462
	0.513333	-0.02601	-0.02407
	0.516667	-0.02556	-0.02738
	0.52	-0.02333	-0.02822
	0.523333	-0.02358	-0.02429
	0.526667	-0.02493	-0.02426
	0.53	-0.02174	-0.02209
	0.533333	-0.0262	-0.02379
	0.536667	-0.02667	-0.02318
	0.54	-0.02402	-0.02625
	0.543333	-0.02305	-0.02422
	0.546667	-0.02926	-0.02646
	0.55	-0.02564	-0.02193
	0.553333	-0.02404	-0.02519
	0.556667	-0.02361	-0.02313
	0.56	-0.02846	-0.02652
	0.563333	-0.0238	-0.02308
	0.566667	-0.02331	-0.02525
	0.57	-0.02632	-0.02344
	0.573333	-0.02298	-0.02514
	0.576667	-0.02378	-0.02156
	0.58	-0.0268	-0.02348
	0.583333	-0.02066	-0.02587
	0.586667	-0.02666	-0.02323
	0.59	-0.02838	-0.02257
	0.593333	-0.02607	-0.02494
	0.596667	-0.02207	-0.02466
	0.6	-0.02752	-0.02721
	0.603333	-0.02167	-0.02315
	0.606667	-0.0241	-0.02268
	0.61	-0.02171	-0.0201
	0.613333	-0.0225	-0.02633
	0.616667	-0.02347	-0.02209
	0.62	-0.02784	-0.02703
	0.623333	-0.02294	-0.02613
	0.626667	-0.0239	-0.025
	0.63	-0.02417	-0.02463
	0.633333	-0.02317	-0.02719
	0.636667	-0.02536	-0.02451
	0.64	-0.02408	-0.02424
	0.643333	-0.02151	-0.02569
	0.646667	-0.02499	-0.02664
	0.65	-0.02854	-0.02616
	0.653333	-0.02569	-0.02981
	0.656667	-0.02433	-0.02569
	0.66	-0.02514	-0.02722
	0.663333	-0.02677	-0.02272
	0.666667	-0.02253	-0.02963
	0.67	-0.02271	-0.02872
	0.673333	-0.02752	-0.02628
	0.676667	-0.02365	-0.02509
	0.68	-0.02442	-0.02661
	0.683333	-0.0246	-0.02471
	0.686667	-0.02287	-0.02745
	0.69	-0.02933	-0.02898
	0.693333	-0.02576	-0.02721
	0.696667	-0.0218	-0.02609
	0.7	-0.02665	-0.02514
	0.703333	-0.02313	-0.0257
	0.706667	-0.02167	-0.02778
	0.71	-0.02416	-0.0285
	0.713333	-0.02349	-0.02786
	0.716667	-0.02458	-0.02996
	0.72	-0.02699	-0.02722
	0.723333	-0.02865	-0.02708
	0.726667	-0.02641	-0.02652
	0.73	-0.02574	-0.02533
	0.733333	-0.02642	-0.02549
	0.736667	-0.02751	-0.02674
	0.74	-0.02601	-0.02744
	0.743333	-0.02601	-0.0293
	0.746667	-0.02613	-0.02496
	0.75	-0.02462	-0.02689
	0.753333	-0.02778	-0.02585
	0.756667	-0.02763	-0.03103
	0.76	-0.02503	-0.02448
	0.763333	-0.02519	-0.02858
	0.766667	-0.02549	-0.02402
	0.77	-0.02557	-0.0265
	0.773333	-0.025	-0.02589
	0.776667	-0.02421	-0.02441
	0.78	-0.02693	-0.03051
	0.783333	-0.02809	-0.02578
	0.786667	-0.03074	-0.02548
	0.79	-0.02685	-0.02843
	0.793333	-0.02476	-0.0264
	0.796667	-0.02716	-0.02641
	0.8	-0.02226	-0.02512
	0.803333	-0.02497	-0.03082
	0.806667	-0.03031	-0.02714
	0.81	-0.03093	-0.02496
	0.813333	-0.02612	-0.02517
	0.816667	-0.02629	-0.0283
	0.82	-0.02753	-0.03038
	0.823333	-0.02364	-0.02611
	0.826667	-0.02889	-0.0235
	0.83	-0.02713	-0.02632
	0.833333	-0.02527	-0.02783
	0.836667	-0.02987	-0.02584
	0.84	-0.02984	-0.02592
	0.843333	-0.02582	-0.0277
	0.846667	-0.02887	-0.02756
	0.85	-0.03121	-0.02434
	0.853333	-0.02974	-0.02601
	0.856667	-0.02335	-0.02586
	0.86	-0.0276	-0.03197
	0.863333	-0.02888	-0.02544
	0.866667	-0.02118	-0.02254
	0.87	-0.03098	-0.02871
	0.873333	-0.03111	-0.02731
	0.876667	-0.02701	-0.02703
	0.88	-0.02645	-0.0272
	0.883333	-0.02823	-0.0269
	0.886667	-0.02558	-0.03049
	0.89	-0.02594	-0.0242
	0.893333	-0.0237	-0.02649
	0.896667	-0.02295	-0.02614
	0.9	-0.02851	-0.0271
	0.903333	-0.02797	-0.02604
	0.906667	-0.02385	-0.02449
	0.91	-0.02811	-0.02815
	0.913333	-0.02879	-0.02884
	0.916667	-0.02613	-0.02502
	0.92	-0.02307	-0.02548
	0.923333	-0.02973	-0.03051
	0.926667	-0.02648	-0.02784
	0.93	-0.02825	-0.0274
	0.933333	-0.0239	-0.0267
	0.936667	-0.03166	-0.0261
	0.94	-0.02464	-0.02605
	0.943333	-0.0268	-0.0252
	0.946667	-0.03153	-0.02882
	0.95	-0.02791	-0.02648
	0.953333	-0.02771	-0.0307
	0.956667	-0.03033	-0.02434
	0.96	-0.02364	-0.02978
	0.963333	-0.02383	-0.03039
	0.966667	-0.02647	-0.0293
	0.97	-0.02474	-0.02983
	0.973333	-0.028	-0.0289
	0.976667	-0.03244	-0.03045
	0.98	-0.0285	-0.02607
	0.983333	-0.03205	-0.02706
	0.986667	-0.02876	-0.02598
	0.99	-0.02747	-0.02583
	0.993333	-0.02471	-0.02736
	0.996667	-0.02821	-0.02941
	1	0	0
	1.00333	0.011011	0.015793
	1.00667	0.022727	0.037087
	1.01	0.038532	0.044399
	1.01333	0.047496	0.066064
	1.01667	0.067108	0.082832
	1.02	0.07305	0.101582
	1.02333	0.085854	0.115467
	1.02667	0.10067	0.133313
	1.03	0.10751	0.150274
	1.03333	0.119743	0.167868
	1.03667	0.131814	0.185195
	1.04	0.138859	0.197668
	1.04333	0.149518	0.214297
	1.04667	0.158297	0.227144
	1.05	0.17033	0.245664
	1.05333	0.182855	0.261288
	1.05667	0.183489	0.2774
	1.06	0.198621	0.288303
	1.06333	0.205414	0.30008
	1.06667	0.212624	0.312742
	1.07	0.220581	0.327971
	1.07333	0.228465	0.341288
	1.07667	0.234183	0.356946
	1.08	0.244608	0.364746
	1.08333	0.250956	0.37535
	1.08667	0.257466	0.386372
	1.09	0.262224	0.397198
	1.09333	0.266677	0.40822
	1.09667	0.272569	0.420359
	1.1	0.281143	0.427147
	1.10333	0.286298	0.435351
	1.10667	0.289332	0.445626
	1.11	0.299842	0.45736
	1.11333	0.298501	0.462047
	1.11667	0.307545	0.468469
	1.12	0.310564	0.475751
	1.12333	0.318325	0.487023
	1.12667	0.316432	0.491837
	1.13	0.32643	0.503214
	1.13333	0.332193	0.504992
	1.13667	0.337229	0.519615
	1.14	0.338498	0.523985
	1.14333	0.339323	0.528612
	1.14667	0.349535	0.537237
	1.15	0.34418	0.54644
	1.15333	0.352149	0.551006
	1.15667	0.357077	0.553613
	1.16	0.364455	0.560668
	1.16333	0.362995	0.568773
	1.16667	0.368192	0.570062
	1.17	0.367501	0.572928
	1.17333	0.375822	0.581137
	1.17667	0.375632	0.587178
	1.18	0.37695	0.593316
	1.18333	0.386769	0.596616
	1.18667	0.386052	0.601812
	1.19	0.388476	0.603875
	1.19333	0.393693	0.610332
	1.19667	0.396959	0.616687
	1.2	0.397883	0.620352
	1.20333	0.399582	0.62544
	1.20667	0.399682	0.631672
	1.21	0.403714	0.629986
	1.21333	0.407294	0.6361
	1.21667	0.409777	0.641422
	1.22	0.413352	0.64574
	1.22333	0.415254	0.650353
	1.22667	0.416053	0.655256
	1.23	0.418006	0.657517
	1.23333	0.420061	0.662415
	1.23667	0.42226	0.660755
	1.24	0.423889	0.662187
	1.24333	0.426439	0.669254
	1.24667	0.430958	0.672981
	1.25	0.428033	0.674479
	1.25333	0.433826	0.677985
	1.25667	0.433442	0.686568
	1.26	0.438158	0.680775
	1.26333	0.438278	0.689355
	1.26667	0.441704	0.690932
	1.27	0.4418	0.691935
	1.27333	0.443373	0.69516
	1.27667	0.447378	0.697844
	1.28	0.444884	0.702501
	1.28333	0.451664	0.702939
	1.28667	0.452612	0.708904
	1.29	0.451045	0.710145
	1.29333	0.453569	0.712351
	1.29667	0.450736	0.715362
	1.3	0.455388	0.721659
	1.30333	0.461296	0.719599
	1.30667	0.461499	0.723931
	1.31	0.462591	0.724464
	1.31333	0.463434	0.724901
	1.31667	0.465549	0.727505
	1.32	0.466836	0.734045
	1.32333	0.464444	0.732167
	1.32667	0.468888	0.735627
	1.33	0.473249	0.736216
	1.33333	0.470505	0.739802
	1.33667	0.470518	0.745442
	1.34	0.474318	0.744888
	1.34333	0.476426	0.742673
	1.34667	0.47668	0.750627
	1.35	0.476464	0.752257
	1.35333	0.479614	0.74949
	1.35667	0.478061	0.756984
	1.36	0.483034	0.75917
	1.36333	0.483904	0.762131
	1.36667	0.485091	0.761326
	1.37	0.488649	0.761612
	1.37333	0.48373	0.763809
	1.37667	0.489168	0.767023
	1.38	0.49029	0.76487
	1.38333	0.492636	0.768406
	1.38667	0.489348	0.772674
	1.39	0.496597	0.774784
	1.39333	0.492693	0.771671
	1.39667	0.496877	0.774805
	1.4	0.49192	0.779286
	1.40333	0.499203	0.775053
	1.40667	0.494404	0.781567
	1.41	0.501555	0.779597
	1.41333	0.499474	0.780971
	1.41667	0.49915	0.786314
	1.42	0.50533	0.791309
	1.42333	0.499981	0.789035
	1.42667	0.503985	0.789252
	1.43	0.504531	0.791188
	1.43333	0.505696	0.790531
	1.43667	0.505151	0.795251
	1.44	0.505602	0.799906
	1.44333	0.507648	0.799603
	1.44667	0.51076	0.798758
	1.45	0.509901	0.800839
	1.45333	0.510571	0.801585
	1.45667	0.510104	0.804304
	1.46	0.511237	0.802053
	1.46333	0.51168	0.801792
	1.46667	0.517404	0.808215
	1.47	0.516335	0.809636
	1.47333	0.51469	0.810779
	1.47667	0.514177	0.811749
	1.48	0.519185	0.811018
	1.48333	0.521281	0.810776
	1.48667	0.517548	0.813642
	1.49	0.51682	0.819262
	1.49333	0.518489	0.812668
	1.49667	0.51913	0.81342
	1.5	0.520432	0.82035
	1.50333	0.525066	0.815436
	1.50667	0.522131	0.820902
	1.51	0.524491	0.821098
	1.51333	0.523935	0.821113
	1.51667	0.52884	0.828891
	1.52	0.525792	0.820802
	1.52333	0.524798	0.822205
	1.52667	0.527184	0.82447
	1.53	0.526573	0.825686
	1.53333	0.527573	0.828038
	1.53667	0.531831	0.834205
	1.54	0.534293	0.828855
	1.54333	0.53001	0.835676
	1.54667	0.534515	0.83212
	1.55	0.532751	0.837334
	1.55333	0.538621	0.83949
	1.55667	0.533318	0.83663
	1.56	0.529082	0.83764
	1.56333	0.53323	0.83801
	1.56667	0.535946	0.836632
	1.57	0.538084	0.843169
	1.57333	0.536784	0.841315
	1.57667	0.540514	0.843905
	1.58	0.541614	0.843835
	1.58333	0.53618	0.844224
	1.58667	0.541883	0.84684
	1.59	0.54171	0.849672
	1.59333	0.546147	0.842466
	1.59667	0.544897	0.850222
	1.6	0.540443	0.846189
	1.60333	0.544249	0.846425
	1.60667	0.54426	0.851129
	1.61	0.540659	0.847898
	1.61333	0.544806	0.852993
	1.61667	0.548805	0.855432
	1.62	0.544217	0.852703
	1.62333	0.548009	0.856715
	1.62667	0.550361	0.860204
	1.63	0.551263	0.854768
	1.63333	0.551541	0.859779
	1.63667	0.55254	0.859197
	1.64	0.550391	0.856272
	1.64333	0.551621	0.861223
	1.64667	0.552175	0.859956
	1.65	0.551291	0.864638
	1.65333	0.550609	0.861852
	1.65667	0.550372	0.862209
	1.66	0.55655	0.865095
	1.66333	0.556423	0.866105
	1.66667	0.550775	0.864542
	1.67	0.557835	0.866026
	1.67333	0.5542	0.870794
	1.67667	0.556252	0.873663
	1.68	0.556849	0.874255
	1.68333	0.556053	0.872187
	1.68667	0.556329	0.870994
	1.69	0.55758	0.8731
	1.69333	0.559794	0.872473
	1.69667	0.561311	0.874094
	1.7	0.558633	0.877153
	1.70333	0.563027	0.87591
	1.70667	0.564884	0.877798
	1.71	0.566161	0.875182
	1.71333	0.560969	0.874431
	1.71667	0.562748	0.876911
	1.72	0.558157	0.873967
	1.72333	0.564124	0.878745
	1.72667	0.569421	0.87895
	1.73	0.563352	0.877109
	1.73333	0.565861	0.877609
	1.73667	0.567881	0.88187
	1.74	0.565447	0.884876
	1.74333	0.564008	0.880673
	1.74667	0.563202	0.886826
	1.75	0.569905	0.883044
	1.75333	0.568998	0.885888
	1.75667	0.56765	0.886356
	1.76	0.56739	0.887284
	1.76333	0.568623	0.890932
	1.76667	0.567719	0.88449
	1.77	0.567032	0.887793
	1.77333	0.567243	0.888311
	1.77667	0.568384	0.892558
	1.78	0.569352	0.888411
	1.78333	0.569835	0.89201
	1.78667	0.571709	0.892675
	1.79	0.569976	0.89409
	1.79333	0.570321	0.890668
	1.79667	0.572431	0.893699
	1.8	0.574593	0.896117
	1.80333	0.571187	0.897386
	1.80667	0.576627	0.892331
	1.81	0.577906	0.896472
	1.81333	0.573355	0.900499
	1.81667	0.579314	0.896729
	1.82	0.575665	0.895087
	1.82333	0.576414	0.896494
	1.82667	0.58279	0.897636
	1.83	0.578113	0.902005
	1.83333	0.57472	0.902956
	1.83667	0.579444	0.901583
	1.84	0.580047	0.899537
	1.84333	0.577529	0.904972
	1.84667	0.581247	0.901145
	1.85	0.576749	0.90352
	1.85333	0.580419	0.905114
	1.85667	0.583324	0.904028
	1.86	0.576681	0.90714
	1.86333	0.583392	0.902383
	1.86667	0.582821	0.902611
	1.87	0.585226	0.906524
	1.87333	0.583746	0.907856
	1.87667	0.585029	0.912413
	1.88	0.586736	0.90835
	1.88333	0.586821	0.905273
	1.88667	0.586275	0.909965
	1.89	0.584866	0.916219
	1.89333	0.579669	0.910006
	1.89667	0.583919	0.910874
	1.9	0.581532	0.915171
	1.90333	0.58989	0.913149
	1.90667	0.586396	0.913214
	1.91	0.58556	0.916546
	1.91333	0.591277	0.913846
	1.91667	0.588784	0.91826
	1.92	0.590584	0.91748
	1.92333	0.587105	0.913285
	1.92667	0.590726	0.919175
	1.93	0.588342	0.918868
	1.93333	0.588518	0.913612
	1.93667	0.588877	0.915705
	1.94	0.59468	0.919032
	1.94333	0.58862	0.921099
	1.94667	0.590124	0.923605
	1.95	0.592187	0.921184
	1.95333	0.590512	0.919667
	1.95667	0.592603	0.921009
	1.96	0.591533	0.923146
	1.96333	0.592338	0.923712
	1.96667	0.590576	0.918473
	1.97	0.594717	0.924719
	1.97333	0.592691	0.925305
	1.97667	0.593318	0.922363
	1.98	0.593122	0.925192
	1.98333	0.594269	0.9289
	1.98667	0.599189	0.928408
	1.99	0.594388	0.926032
	1.99333	0.593886	0.921509
	1.99667	0.597377	0.926492
	2	0.589528	0.931469
	2.00333	0.596316	0.93299
	2.00667	0.594228	0.932122
	2.01	0.599233	0.929762
	2.01333	0.601503	0.935862
	2.01667	0.600472	0.930556
	2.02	0.598965	0.930824
	2.02333	0.594779	0.931435
	2.02667	0.599898	0.930813
	2.03	0.600098	0.932304
	2.03333	0.598197	0.933147
	2.03667	0.601037	0.935832
	2.04	0.601029	0.93586
	2.04333	0.600816	0.930591
	2.04667	0.599788	0.93576
	2.05	0.597331	0.935381
	2.05333	0.598496	0.940014
	2.05667	0.599675	0.933998
	2.06	0.607542	0.93682
	2.06333	0.604033	0.939092
	2.06667	0.602514	0.936126
	2.07	0.601321	0.938646
	2.07333	0.603939	0.936899
	2.07667	0.605479	0.938658
	2.08	0.602404	0.93606
	2.08333	0.602555	0.939337
	2.08667	0.604173	0.940236
	2.09	0.602793	0.938806
	2.09333	0.602494	0.941637
	2.09667	0.605542	0.940876
	2.1	0.602306	0.944809
	2.10333	0.602911	0.944691
	2.10667	0.606407	0.942719
	2.11	0.607453	0.943559
	2.11333	0.607011	0.946269
	2.11667	0.607728	0.945967
	2.12	0.605811	0.945957
	2.12333	0.611723	0.942117
	2.12667	0.604647	0.946136
	2.13	0.606212	0.943007
	2.13333	0.607369	0.939717
	2.13667	0.612736	0.948142
	2.14	0.610375	0.946826
	2.14333	0.603803	0.951624
	2.14667	0.607647	0.948624
	2.15	0.611285	0.946147
	2.15333	0.613016	0.947059
	2.15667	0.610867	0.947728
	2.16	0.61114	0.948352
	2.16333	0.612058	0.94731
	2.16667	0.609776	0.951485
	2.17	0.61175	0.953111
	2.17333	0.611498	0.949493
	2.17667	0.611451	0.952641
	2.18	0.611843	0.952638
	2.18333	0.615225	0.947438
	2.18667	0.613314	0.955561
	2.19	0.614908	0.953352
	2.19333	0.611045	0.954637
	2.19667	0.611444	0.948249
	2.2	0.612527	0.96016
	2.20333	0.612683	0.955379
	2.20667	0.613112	0.950113
	2.21	0.614121	0.961772
	2.21333	0.611866	0.957164
	2.21667	0.616378	0.958461
	2.22	0.614632	0.957455
	2.22333	0.619495	0.955367
	2.22667	0.613516	0.957238
	2.23	0.615228	0.957024
	2.23333	0.61395	0.955774
	2.23667	0.614746	0.957324
	2.24	0.616154	0.958566
	2.24333	0.614416	0.956836
	2.24667	0.617188	0.958122
	2.25	0.621416	0.959143
	2.25333	0.614369	0.956574
	2.25667	0.615912	0.961162
	2.26	0.614704	0.960194
	2.26333	0.620723	0.962699
	2.26667	0.618304	0.964112
	2.27	0.618382	0.958605
	2.27333	0.619487	0.966403
	2.27667	0.622631	0.960034
	2.28	0.619523	0.966343
	2.28333	0.617383	0.965792
	2.28667	0.622472	0.963667
	2.29	0.616553	0.964163
	2.29333	0.619402	0.966612
	2.29667	0.622489	0.963065
	2.3	0.62122	0.961057
	2.30333	0.623441	0.9657
	2.30667	0.619848	0.963985
	2.31	0.621322	0.965777
	2.31333	0.622041	0.964064
	2.31667	0.615187	0.962556
	2.32	0.623592	0.965183
	2.32333	0.62887	0.967317
	2.32667	0.627824	0.970101
	2.33	0.62122	0.968921
	2.33333	0.621824	0.968882
	2.33667	0.624409	0.966172
	2.34	0.622379	0.966519
	2.34333	0.61922	0.965743
	2.34667	0.623291	0.972708
	2.35	0.624473	0.966622
	2.35333	0.627875	0.968426
	2.35667	0.625139	0.974446
	2.36	0.625602	0.975219
	2.36333	0.626477	0.970001
	2.36667	0.6242	0.972406
	2.37	0.626506	0.971424
	2.37333	0.62507	0.971681
	2.37667	0.629364	0.969132
	2.38	0.629877	0.97839
	2.38333	0.625721	0.970532
	2.38667	0.627396	0.974671
	2.39	0.628496	0.971482
	2.39333	0.624506	0.973352
	2.39667	0.628095	0.972736
	2.4	0.625674	0.972037
	2.40333	0.628567	0.97731
	2.40667	0.631295	0.973224
	2.41	0.627291	0.977761
	2.41333	0.624418	0.973516
	2.41667	0.629147	0.975599
	2.42	0.626016	0.977241
	2.42333	0.63124	0.974053
	2.42667	0.625049	0.977315
	2.43	0.627155	0.975564
	2.43333	0.632175	0.978679
	2.43667	0.628477	0.976286
	2.44	0.634751	0.977913
	2.44333	0.628255	0.979333
	2.44667	0.626671	0.979044
	2.45	0.630641	0.979326
	2.45333	0.632807	0.983349
	2.45667	0.629586	0.978894
	2.46	0.630594	0.980269
	2.46333	0.62811	0.979979
	2.46667	0.631167	0.977819
	2.47	0.632967	0.980163
	2.47333	0.633197	0.98189
	2.47667	0.628264	0.976787
	2.48	0.628813	0.985828
	2.48333	0.633651	0.982438
	2.48667	0.630356	0.985325
	2.49	0.632333	0.982793
	2.49333	0.630378	0.982471
	2.49667	0.633627	0.979101
	2.5	0.636387	0.982974
	2.50333	0.633654	0.98393
	2.50667	0.635654	0.983908
	2.51	0.635127	0.981868
	2.51333	0.634318	0.98337
	2.51667	0.634559	0.987126
	2.52	0.631216	0.982632
	2.52333	0.634267	0.985089
	2.52667	0.634225	0.985653
	2.53	0.634299	0.987818
	2.53333	0.635838	0.98854
	2.53667	0.631827	0.989053
	2.54	0.631736	0.98527
	2.54333	0.636929	0.986874
	2.54667	0.632452	0.988885
	2.55	0.638752	0.989729
	2.55333	0.635516	0.99163
	2.55667	0.635644	0.990611
	2.56	0.634072	0.989471
	2.56333	0.63766	0.991026
	2.56667	0.6394	0.990677
	2.57	0.635592	0.989092
	2.57333	0.638838	0.988853
	2.57667	0.638142	0.990493
	2.58	0.641897	0.993565
	2.58333	0.640116	0.991123
	2.58667	0.636264	0.9903
	2.59	0.638748	0.990317
	2.59333	0.645919	0.994049
	2.59667	0.642304	0.991185
	2.6	0.636999	0.996973
	2.60333	0.639124	0.989275
	2.60667	0.637256	0.994744
	2.61	0.641331	0.99327
	2.61333	0.644759	0.998936
	2.61667	0.644675	0.995165
	2.62	0.637601	0.993917
	2.62333	0.642001	0.998115
	2.62667	0.638587	0.991983
	2.63	0.642376	1.00062
	2.63333	0.642286	0.993164
	2.63667	0.642753	0.993563
	2.64	0.639268	0.997616
	2.64333	0.643927	0.999156
	2.64667	0.639962	0.99489
	2.65	0.635866	0.995937
	2.65333	0.641129	0.998332
	2.65667	0.639604	0.996568
	2.66	0.63993	0.996512
	2.66333	0.64524	0.998968
	2.66667	0.64529	0.996568
	2.67	0.643336	0.995308
	2.67333	0.644098	0.995538
	2.67667	0.643914	0.99954
	2.68	0.649352	1.00191
	2.68333	0.645509	1.00237
	2.68667	0.643646	0.998529
	2.69	0.645982	1.00123
	2.69333	0.646328	1.00147
	2.69667	0.644581	1.00088
	2.7	0.643965	1.00206
	2.70333	0.643815	0.998046
	2.70667	0.647062	0.99784
	2.71	0.64921	1.00127
	2.71333	0.646959	1.00134
	2.71667	0.644472	1.0043
	2.72	0.645235	1.00162
	2.72333	0.649346	0.99798
	2.72667	0.646949	1.00366
	2.73	0.648565	1.00122
	2.73333	0.646769	1.00104
	2.73667	0.645184	1.00475
	2.74	0.645626	1.00468
	2.74333	0.64953	1.006
	2.74667	0.645604	1.00843
	2.75	0.650303	1.00908
	2.75333	0.649733	1.00252
	2.75667	0.649863	1.00727
	2.76	0.64843	1.00524
	2.76333	0.649338	1.00089
	2.76667	0.645982	1.00593
	2.77	0.648981	1.00486
	2.77333	0.647437	1.00433
	2.77667	0.651388	1.00893
	2.78	0.646245	1.00675
	2.78333	0.644522	1.00665
	2.78667	0.65206	1.01143
	2.79	0.651103	1.00441
	2.79333	0.648554	1.00815
	2.79667	0.650617	1.00588
	2.8	0.648404	1.01088
	2.80333	0.650459	1.00708
	2.80667	0.6519	1.00712
	2.81	0.651904	1.00975
	2.81333	0.644331	1.00809
	2.81667	0.647398	1.00708
	2.82	0.650642	1.01128
	2.82333	0.64847	1.0138
	2.82667	0.651454	1.00877
	2.83	0.652552	1.01364
	2.83333	0.653352	1.01196
	2.83667	0.650453	1.01607
	2.84	0.653923	1.01051
	2.84333	0.651134	1.01136
	2.84667	0.653262	1.01516
	2.85	0.656886	1.01169
	2.85333	0.652305	1.00957
	2.85667	0.652292	1.01073
	2.86	0.654745	1.01611
	2.86333	0.650153	1.01366
	2.86667	0.651401	1.01508
	2.87	0.652758	1.01514
	2.87333	0.652734	1.01321
	2.87667	0.653344	1.01673
	2.88	0.653495	1.01205
	2.88333	0.65757	1.01902
	2.88667	0.654754	1.01221
	2.89	0.649509	1.01478
	2.89333	0.654078	1.01621
	2.89667	0.656059	1.0166
	2.9	0.653306	1.01999
	2.90333	0.659105	1.01749
	2.90667	0.655539	1.0201
	2.91	0.656589	1.01811
	2.91333	0.658069	1.01745
	2.91667	0.654938	1.01818
	2.92	0.657332	1.01626
	2.92333	0.653995	1.01878
	2.92667	0.654262	1.01887
	2.93	0.658432	1.0148
	2.93333	0.661408	1.015
	2.93667	0.657481	1.01817
	2.94	0.658645	1.01681
	2.94333	0.657134	1.01955
	2.94667	0.661695	1.01655
	2.95	0.657585	1.01852
	2.95333	0.661921	1.02029
	2.95667	0.657998	1.02553
	2.96	0.659855	1.02337
	2.96333	0.65701	1.02025
	2.96667	0.657683	1.02117
	2.97	0.657239	1.02117
	2.97333	0.657918	1.02023
	2.97667	0.656499	1.01663
	2.98	0.661104	1.02086
	2.98333	0.661721	1.02023
	2.98667	0.66231	1.02182
	2.99	0.660232	1.01977
	2.99333	0.655981	1.01758
	2.99667	0.657651	1.02038
	3	0.662838	1.02158
	3.00333	0.657351	1.02258
	3.00667	0.658209	1.0222
	3.01	0.657293	1.0241
	3.01333	0.660775	1.0239
	3.01667	0.662323	1.02398
	3.02	0.659719	1.02568
	3.02333	0.663831	1.01858
	3.02667	0.661836	1.02406
	3.03	0.660475	1.02918
	3.03333	0.659535	1.02411
	3.03667	0.661183	1.02689
	3.04	0.665331	1.02609
	3.04333	0.663261	1.02507
	3.04667	0.668217	1.02502
	3.05	0.662367	1.0288
	3.05333	0.664338	1.02914
	3.05667	0.661476	1.02846
	3.06	0.666402	1.02634
	3.06333	0.662483	1.02643
	3.06667	0.666135	1.02193
	3.07	0.666096	1.03132
	3.07333	0.66231	1.02437
	3.07667	0.66149	1.03137
	3.08	0.662759	1.0267
	3.08333	0.663789	1.02773
	3.08667	0.663197	1.02798
	3.09	0.663404	1.02615
	3.09333	0.662553	1.02459
	3.09667	0.663958	1.02776
	3.1	0.66489	1.03326
	3.10333	0.667696	1.02717
	3.10667	0.666159	1.03031
	3.11	0.665749	1.02991
	3.11333	0.667405	1.03347
	3.11667	0.6642	1.02882
	3.12	0.662707	1.03376
	3.12333	0.669816	1.02829
	3.12667	0.662155	1.02556
	3.13	0.663472	1.03232
	3.13333	0.6614	1.0321
	3.13667	0.668929	1.031
	3.14	0.667703	1.03051
	3.14333	0.665723	1.03209
	3.14667	0.66757	1.02972
	3.15	0.664589	1.03087
	3.15333	0.668741	1.03276
	3.15667	0.668242	1.03271
	3.16	0.664013	1.02858
	3.16333	0.663051	1.03449
	3.16667	0.665533	1.03281
	3.17	0.667624	1.03101
	3.17333	0.664048	1.0295
	3.17667	0.666053	1.02983
	3.18	0.667114	1.03562
	3.18333	0.66574	1.03269
	3.18667	0.669362	1.04019
	3.19	0.668288	1.03668
	3.19333	0.669257	1.03512
	3.19667	0.669825	1.03555
	3.2	0.668762	1.04098
	3.20333	0.666915	1.03353
	3.20667	0.67063	1.03786
	3.21	0.664918	1.03198
	3.21333	0.6687	1.03432
	3.21667	0.670328	1.03888
	3.22	0.672266	1.03837
	3.22333	0.669216	1.0347
	3.22667	0.66519	1.03888
	3.23	0.670691	1.03792
	3.23333	0.666754	1.03509
	3.23667	0.666636	1.03838
	3.24	0.669523	1.04127
	3.24333	0.671895	1.04204
	3.24667	0.672524	1.03768
	3.25	0.664977	1.03708
	3.25333	0.669236	1.03581
	3.25667	0.668682	1.03553
	3.26	0.671895	1.04119
	3.26333	0.672582	1.0394
	3.26667	0.674151	1.04116
	3.27	0.67108	1.03918
	3.27333	0.670533	1.04151
	3.27667	0.674936	1.03897
	3.28	0.670408	1.04278
	3.28333	0.671293	1.03924
	3.28667	0.674023	1.03898
	3.29	0.670023	1.04147
	3.29333	0.668292	1.04581
	3.29667	0.671862	1.04301
	3.3	0.673501	1.04188
	3.30333	0.672855	1.04122
	3.30667	0.672975	1.04254
	3.31	0.678288	1.04375
	3.31333	0.673996	1.04257
	3.31667	0.67302	1.0445
	3.32	0.67715	1.04083
	3.32333	0.67273	1.043
	3.32667	0.673713	1.04063
	3.33	0.676171	1.04112
	3.33333	0.673993	1.04266
	3.33667	0.673175	1.04733
	3.34	0.671499	1.04295
	3.34333	0.671647	1.04673
	3.34667	0.670987	1.04328
	3.35	0.673438	1.04317
	3.35333	0.673272	1.04028
	3.35667	0.675336	1.04478
	3.36	0.672579	1.0448
	3.36333	0.668813	1.04214
	3.36667	0.673743	1.04657
	3.37	0.675709	1.04191
	3.37333	0.67783	1.04413
	3.37667	0.677382	1.04288
	3.38	0.67723	1.04503
	3.38333	0.678496	1.04365
	3.38667	0.678743	1.04757
	3.39	0.674457	1.04627
	3.39333	0.68015	1.04669
	3.39667	0.678388	1.04899
	3.4	0.677699	1.04724
	3.40333	0.680745	1.04451
	3.40667	0.677634	1.04744
	3.41	0.678563	1.05047
	3.41333	0.674357	1.04745
	3.41667	0.675417	1.04531
	3.42	0.678507	1.05085
	3.42333	0.675767	1.04974
	3.42667	0.680735	1.04582
	3.43	0.674873	1.05451
	3.43333	0.676244	1.04699
	3.43667	0.677462	1.0491
	3.44	0.678923	1.04806
	3.44333	0.679111	1.04589
	3.44667	0.677344	1.0527
	3.45	0.678992	1.04997
	3.45333	0.682317	1.04974
	3.45667	0.678724	1.05034
	3.46	0.678008	1.04694
	3.46333	0.679042	1.04833
	3.46667	0.676902	1.05666
	3.47	0.680658	1.04815
	3.47333	0.6782	1.04455
	3.47667	0.676628	1.04506
	3.48	0.68121	1.0465
	3.48333	0.6832	1.05094
	3.48667	0.678962	1.05137
	3.49	0.681016	1.05322
	3.49333	0.67959	1.04939
	3.49667	0.681308	1.05074
	3.5	0.679664	1.05442
	3.50333	0.680127	1.05128
	3.50667	0.67946	1.04771
	3.51	0.676715	1.05405
	3.51333	0.682417	1.05039
	3.51667	0.678847	1.05027
	3.52	0.679982	1.05299
	3.52333	0.683229	1.05344
	3.52667	0.68399	1.05377
	3.53	0.68312	1.0525
	3.53333	0.682077	1.05475
	3.53667	0.679201	1.04935
	3.54	0.681424	1.0544
	3.54333	0.682001	1.0527
	3.54667	0.680204	1.05246
	3.55	0.68457	1.05321
	3.55333	0.681831	1.0549
	3.55667	0.683241	1.05546
	3.56	0.684009	1.0525
	3.56333	0.684627	1.05409
	3.56667	0.680548	1.05458
	3.57	0.679341	1.0513
	3.57333	0.686034	1.05415
	3.57667	0.680915	1.05495
	3.58	0.683382	1.05328
	3.58333	0.68256	1.05268
	3.58667	0.680339	1.05204
	3.59	0.679747	1.053
	3.59333	0.682187	1.05613
	3.59667	0.683749	1.05292
	3.6	0.682842	1.0556
	3.60333	0.685654	1.05828
	3.60667	0.683787	1.05944
	3.61	0.681335	1.05473
	3.61333	0.683813	1.06117
	3.61667	0.686702	1.06009
	3.62	0.681561	1.0593
	3.62333	0.681936	1.05813
	3.62667	0.686068	1.06161
	3.63	0.683482	1.06191
	3.63333	0.681849	1.05704
	3.63667	0.685488	1.05659
	3.64	0.681844	1.0578
	3.64333	0.683879	1.05998
	3.64667	0.684516	1.05972
	3.65	0.68504	1.05946
	3.65333	0.690155	1.0579
	3.65667	0.684653	1.05843
	3.66	0.68392	1.06234
	3.66333	0.686357	1.05806
	3.66667	0.690167	1.06266
	3.67	0.686019	1.06077
	3.67333	0.684016	1.06079
	3.67667	0.682832	1.05733
	3.68	0.683494	1.06239
	3.68333	0.683163	1.06005
	3.68667	0.683846	1.06487
	3.69	0.687055	1.06604
	3.69333	0.683056	1.06252
	3.69667	0.683797	1.06273
	3.7	0.687347	1.0657
	3.70333	0.684102	1.06263
	3.70667	0.685152	1.06206
	3.71	0.688916	1.06562
	3.71333	0.686858	1.05984
	3.71667	0.689753	1.05976
	3.72	0.686237	1.06457
	3.72333	0.689502	1.06423
	3.72667	0.685708	1.06163
	3.73	0.68349	1.06427
	3.73333	0.689969	1.06362
	3.73667	0.685968	1.06291
	3.74	0.685872	1.06757
	3.74333	0.68849	1.0635
	3.74667	0.690607	1.06486
	3.75	0.686793	1.06108
	3.75333	0.689564	1.06331
	3.75667	0.684123	1.06076
	3.76	0.68996	1.06135
	3.76333	0.687093	1.06416
	3.76667	0.688593	1.06554
	3.77	0.686314	1.06716
	3.77333	0.687314	1.06344
	3.77667	0.6911	1.05985
	3.78	0.690509	1.06354
	3.78333	0.685121	1.06454
	3.78667	0.688343	1.06749
	3.79	0.693159	1.06196
	3.79333	0.689708	1.06744
	3.79667	0.689677	1.06382
	3.8	0.688926	1.06748
	3.80333	0.6913	1.06799
	3.80667	0.690194	1.07044
	3.81	0.69068	1.06835
	3.81333	0.687968	1.06743
	3.81667	0.694331	1.06704
	3.82	0.69497	1.06933
	3.82333	0.690812	1.06577
	3.82667	0.68921	1.06643
	3.83	0.690633	1.06819
	3.83333	0.689924	1.06646
	3.83667	0.689914	1.07012
	3.84	0.690778	1.06664
	3.84333	0.692422	1.06969
	3.84667	0.689777	1.07126
	3.85	0.690632	1.06872
	3.85333	0.691826	1.06754
	3.85667	0.691108	1.06843
	3.86	0.694171	1.06918
	3.86333	0.692733	1.06868
	3.86667	0.694482	1.06781
	3.87	0.695621	1.06492
	3.87333	0.694223	1.06813
	3.87667	0.69039	1.06563
	3.88	0.695477	1.068
	3.88333	0.693047	1.07264
	3.88667	0.692104	1.06668
	3.89	0.695032	1.07446
	3.89333	0.693096	1.07068
	3.89667	0.692897	1.07028
	3.9	0.695545	1.06827
	3.90333	0.693175	1.07393
	3.90667	0.694381	1.07018
	3.91	0.692854	1.0718
	3.91333	0.691412	1.06695
	3.91667	0.692321	1.07305
	3.92	0.68866	1.07436
	3.92333	0.693533	1.07299
	3.92667	0.691884	1.07176
	3.93	0.689626	1.07257
	3.93333	0.687475	1.06783
	3.93667	0.688575	1.06839
	3.94	0.696555	1.07139
	3.94333	0.6932	1.06882
	3.94667	0.699019	1.07035
	3.95	0.692863	1.07571
	3.95333	0.69387	1.0706
	3.95667	0.6934	1.07157
	3.96	0.697966	1.07323
	3.96333	0.695036	1.07338
	3.96667	0.692428	1.06962
	3.97	0.692085	1.07385
	3.97333	0.693068	1.07614
	3.97667	0.691789	1.07236
	3.98	0.695916	1.07264
	3.98333	0.693755	1.07113
	3.98667	0.690636	1.06976
	3.99	0.694931	1.06955
	3.99333	0.696161	1.075
	3.99667	0.6936	1.0746
	4	0.695431	1.07576
	4.00333	0.698315	1.07386
	4.00667	0.692007	1.07659
	4.01	0.696797	1.07433
	4.01333	0.691272	1.0789
	4.01667	0.698083	1.07712
	4.02	0.692007	1.0768
	4.02333	0.691152	1.07844
	4.02667	0.694538	1.07518
	4.03	0.696354	1.07629
	4.03333	0.69948	1.07437
	4.03667	0.697485	1.08099
	4.04	0.697965	1.07445
	4.04333	0.695603	1.0735
	4.04667	0.6994	1.07733
	4.05	0.69465	1.0737
	4.05333	0.696098	1.07915
	4.05667	0.70188	1.07614
	4.06	0.695911	1.07344
	4.06333	0.692884	1.07755
	4.06667	0.694419	1.07862
	4.07	0.700523	1.07954
	4.07333	0.699813	1.07467
	4.07667	0.696656	1.08129
	4.08	0.699796	1.07953
	4.08333	0.700326	1.07705
	4.08667	0.702119	1.08013
	4.09	0.699045	1.08117
	4.09333	0.698573	1.07863
	4.09667	0.699802	1.08071
	4.1	0.694339	1.08024
	4.10333	0.701657	1.07582
	4.10667	0.697745	1.08171
	4.11	0.697722	1.07761
	4.11333	0.695422	1.07842
	4.11667	0.699393	1.07961
	4.12	0.702905	1.08165
	4.12333	0.69409	1.07956
	4.12667	0.700678	1.07993
	4.13	0.705979	1.07835
	4.13333	0.701078	1.07939
	4.13667	0.697804	1.08189
	4.14	0.702336	1.0821
	4.14333	0.700509	1.07899
	4.14667	0.701008	1.07958
	4.15	0.699574	1.08259
	4.15333	0.698572	1.07855
	4.15667	0.698617	1.07869
	4.16	0.699055	1.07936
	4.16333	0.701945	1.08147
	4.16667	0.698565	1.07617
	4.17	0.698805	1.07686
	4.17333	0.702711	1.08026
	4.17667	0.699512	1.07782
	4.18	0.701233	1.08322
	4.18333	0.699364	1.08389
	4.18667	0.703913	1.08065
	4.19	0.700694	1.08334
	4.19333	0.699374	1.08097
	4.19667	0.700087	1.08296
	4.2	0.702794	1.08292
	4.20333	0.703344	1.08421
	4.20667	0.695868	1.08592
	4.21	0.706545	1.08298
	4.21333	0.703849	1.08236
	4.21667	0.70509	1.08169
	4.22	0.699478	1.08064
	4.22333	0.707415	1.08466
	4.22667	0.702422	1.08367
	4.23	0.705757	1.08121
	4.23333	0.702992	1.0851
	4.23667	0.705053	1.08757
	4.24	0.700712	1.08441
	4.24333	0.704679	1.08869
	4.24667	0.705942	1.08259
	4.25	0.704859	1.08373
	4.25333	0.703604	1.08944
	4.25667	0.708363	1.08365
	4.26	0.704268	1.08109
	4.26333	0.701115	1.08529
	4.26667	0.704959	1.08311
	4.27	0.701238	1.08744
	4.27333	0.702885	1.08833
	4.27667	0.703564	1.08472
	4.28	0.701952	1.08455
	4.28333	0.709823	1.08469
	4.28667	0.701616	1.08567
	4.29	0.704847	1.08458
	4.29333	0.705022	1.08905
	4.29667	0.701633	1.08853
	4.3	0.701142	1.08577
	4.30333	0.700685	1.08516
	4.30667	0.700955	1.08732
	4.31	0.702979	1.08538
	4.31333	0.703712	1.08489
	4.31667	0.704996	1.08704
	4.32	0.698262	1.0886
	4.32333	0.704783	1.08771
	4.32667	0.701943	1.08731
	4.33	0.704034	1.08633
	4.33333	0.706005	1.08735
	4.33667	0.701045	1.08904
	4.34	0.703449	1.08543
	4.34333	0.70453	1.08859
	4.34667	0.707355	1.08872
	4.35	0.702129	1.08902
	4.35333	0.707082	1.0882
	4.35667	0.705785	1.08666
	4.36	0.711602	1.09083
	4.36333	0.705117	1.0882
	4.36667	0.705257	1.0899
	4.37	0.704263	1.09197
	4.37333	0.70818	1.09232
	4.37667	0.703465	1.08894
	4.38	0.703862	1.09348
	4.38333	0.704564	1.0947
	4.38667	0.707503	1.09271
	4.39	0.710907	1.0923
	4.39333	0.702356	1.08626
	4.39667	0.705847	1.08668
	4.4	0.710672	1.09283
	4.40333	0.704712	1.08968
	4.40667	0.705824	1.09081
	4.41	0.708617	1.08787
	4.41333	0.702083	1.09056
	4.41667	0.704143	1.08882
	4.42	0.709034	1.08915
	4.42333	0.710586	1.08693
	4.42667	0.704502	1.09062
	4.43	0.707864	1.09266
	4.43333	0.706454	1.09226
	4.43667	0.708027	1.08985
	4.44	0.706441	1.08917
	4.44333	0.7087	1.0922
	4.44667	0.705031	1.09333
	4.45	0.707432	1.09006
	4.45333	0.706688	1.09497
	4.45667	0.70429	1.09048
	4.46	0.70869	1.09161
	4.46333	0.708526	1.09505
	4.46667	0.709072	1.09134
	4.47	0.711253	1.09197
	4.47333	0.706223	1.0916
	4.47667	0.71116	1.09723
	4.48	0.703783	1.09744
	4.48333	0.707128	1.09272
	4.48667	0.707039	1.092
	4.49	0.709498	1.0941
	4.49333	0.707356	1.09584
	4.49667	0.709083	1.09539
	4.5	0.709534	1.09464
	4.50333	0.71029	1.09409
	4.50667	0.708896	1.09414
	4.51	0.704159	1.09332
	4.51333	0.709359	1.09332
	4.51667	0.709688	1.09908
	4.52	0.710601	1.09643
	4.52333	0.708026	1.09567
	4.52667	0.70931	1.09419
	4.53	0.712926	1.09664
	4.53333	0.708142	1.09327
	4.53667	0.706169	1.09178
	4.54	0.712802	1.09343
	4.54333	0.710534	1.09282
	4.54667	0.70822	1.09405
	4.55	0.708879	1.09522
	4.55333	0.707068	1.09667
	4.55667	0.707172	1.09022
	4.56	0.707598	1.09508
	4.56333	0.710104	1.09448
	4.56667	0.71049	1.09603
	4.57	0.709891	1.09956
	4.57333	0.708867	1.10029
	4.57667	0.70962	1.09635
	4.58	0.709978	1.09574
	4.58333	0.709886	1.09724
	4.58667	0.706716	1.09897
	4.59	0.715399	1.09798
	4.59333	0.710312	1.09242
	4.59667	0.71296	1.09535
	4.6	0.707649	1.0998
	4.60333	0.710698	1.0982
	4.60667	0.710244	1.09597
	4.61	0.709902	1.0932
	4.61333	0.708024	1.09613
	4.61667	0.708867	1.09602
	4.62	0.712454	1.09783
	4.62333	0.712389	1.09269
	4.62667	0.710483	1.0952
	4.63	0.713136	1.09363
	4.63333	0.710526	1.09399
	4.63667	0.712994	1.09827
	4.64	0.710851	1.09496
	4.64333	0.707139	1.09631
	4.64667	0.709076	1.09782
	4.65	0.714781	1.09851
	4.65333	0.709769	1.09991
	4.65667	0.713127	1.09643
	4.66	0.710646	1.10085
	4.66333	0.716282	1.10292
	4.66667	0.711224	1.09614
	4.67	0.712947	1.09913
	4.67333	0.715221	1.1019
	4.67667	0.711304	1.10252
	4.68	0.715003	1.10335
	4.68333	0.710787	1.10096
	4.68667	0.712276	1.09861
	4.69	0.711241	1.10258
	4.69333	0.71	1.10153
	4.69667	0.715058	1.10242
	4.7	0.709132	1.10152
	4.70333	0.716636	1.10032
	4.70667	0.71133	1.10191
	4.71	0.715879	1.09952
	4.71333	0.709997	1.10314
	4.71667	0.710545	1.10238
	4.72	0.712801	1.10175
	4.72333	0.715399	1.09845
	4.72667	0.714342	1.10169
	4.73	0.714294	1.10191
	4.73333	0.715149	1.10176
	4.73667	0.717463	1.10187
	4.74	0.710286	1.10848
	4.74333	0.710788	1.10088
	4.74667	0.716348	1.10004
	4.75	0.711838	1.10577
	4.75333	0.717177	1.10141
	4.75667	0.712382	1.10301
	4.76	0.718639	1.09983
	4.76333	0.714488	1.10175
	4.76667	0.711655	1.10151
	4.77	0.710213	1.10248
	4.77333	0.712345	1.1009
	4.77667	0.715409	1.10006
	4.78	0.712819	1.10614
	4.78333	0.718666	1.10204
	4.78667	0.717442	1.09834
	4.79	0.712537	1.10681
	4.79333	0.715018	1.1076
	4.79667	0.717147	1.1035
	4.8	0.715546	1.10064
	4.80333	0.714087	1.1032
	4.80667	0.712445	1.10264
	4.81	0.716908	1.1076
	4.81333	0.71417	1.10329
	4.81667	0.714168	1.10296
	4.82	0.715376	1.10446
	4.82333	0.712345	1.1031
	4.82667	0.714109	1.10149
	4.83	0.716983	1.10418
	4.83333	0.712017	1.10666
	4.83667	0.71705	1.10497
	4.84	0.713759	1.099
	4.84333	0.712743	1.10636
	4.84667	0.717365	1.10731
	4.85	0.718474	1.10192
	4.85333	0.720673	1.10804
	4.85667	0.72004	1.10309
	4.86	0.715769	1.11075
	4.86333	0.715709	1.11007
	4.86667	0.71393	1.10978
	4.87	0.71374	1.10202
	4.87333	0.71532	1.10521
	4.87667	0.716327	1.10604
	4.88	0.719281	1.10798
	4.88333	0.715396	1.10821
	4.88667	0.713672	1.11054
	4.89	0.715745	1.10137
	4.89333	0.721096	1.10525
	4.89667	0.71628	1.10507
	4.9	0.716967	1.10619
	4.90333	0.721502	1.10809
	4.90667	0.712864	1.10608
	4.91	0.718502	1.10735
	4.91333	0.716844	1.10608
	4.91667	0.717999	1.11045
	4.92	0.719198	1.10578
	4.92333	0.713346	1.10672
	4.92667	0.720193	1.10869
	4.93	0.719339	1.10751
	4.93333	0.715754	1.10935
	4.93667	0.720505	1.11131
	4.94	0.715993	1.11068
	4.94333	0.717527	1.10708
	4.94667	0.717873	1.11034
	4.95	0.717572	1.11079
	4.95333	0.718293	1.10207
	4.95667	0.715074	1.10728
	4.96	0.717645	1.10805
	4.96333	0.716215	1.1038
	4.96667	0.719277	1.10625
	4.97	0.720437	1.11414
	4.97333	0.722092	1.10937
	4.97667	0.721109	1.10996
	4.98	0.719619	1.11068
	4.98333	0.720439	1.10926
	4.98667	0.717828	1.11282
	4.99	0.717624	1.11131
	4.99333	0.714798	1.11068
	4.99667	0.719143	1.10957
	5	0.716695	1.11263
	5.00333	0.719823	1.1048
	5.00667	0.717649	1.10546
	5.01	0.718418	1.11332
	5.01333	0.718122	1.10875
	5.01667	0.723822	1.10939
	5.02	0.722799	1.11285
	5.02333	0.721136	1.10987
	5.02667	0.72004	1.11097
	5.03	0.720659	1.11005
	5.03333	0.725601	1.10935
	5.03667	0.719536	1.10853
	5.04	0.718742	1.10853
	5.04333	0.71979	1.10471
	5.04667	0.721136	1.11132
	5.05	0.722793	1.11231
	5.05333	0.724508	1.11156
	5.05667	0.722585	1.11155
	5.06	0.718797	1.10486
	5.06333	0.71852	1.11194
	5.06667	0.722802	1.11148
	5.07	0.720481	1.10851
	5.07333	0.71877	1.10907
	5.07667	0.716985	1.11432
	5.08	0.720835	1.11096
	5.08333	0.724465	1.11299
	5.08667	0.725871	1.11202
	5.09	0.721492	1.1122
	5.09333	0.719711	1.11206
	5.09667	0.725071	1.10949
	5.1	0.720689	1.11164
	5.10333	0.725841	1.11181
	5.10667	0.717314	1.11733
	5.11	0.722901	1.11503
	5.11333	0.722548	1.11841
	5.11667	0.716282	1.11145
	5.12	0.719086	1.11307
	5.12333	0.720828	1.10998
	5.12667	0.722527	1.11567
	5.13	0.718792	1.11444
	5.13333	0.722513	1.11202
	5.13667	0.722811	1.11681
	5.14	0.720274	1.11404
	5.14333	0.722426	1.11589
	5.14667	0.726221	1.11273
	5.15	0.72188	1.11991
	5.15333	0.724166	1.11267
	5.15667	0.724168	1.11358
	5.16	0.723527	1.11436
	5.16333	0.727972	1.11512
	5.16667	0.723026	1.11286
	5.17	0.72329	1.11485
	5.17333	0.722638	1.11396
	5.17667	0.724138	1.11331
	5.18	0.722006	1.11496
	5.18333	0.722062	1.11352
	5.18667	0.72536	1.11697
	5.19	0.724295	1.12042
	5.19333	0.723591	1.11088
	5.19667	0.727303	1.1166
	5.2	0.725377	1.11713
	5.20333	0.726806	1.11747
	5.20667	0.724107	1.11501
	5.21	0.727384	1.11416
	5.21333	0.723669	1.11624
	5.21667	0.72895	1.11836
	5.22	0.722074	1.11612
	5.22333	0.720865	1.11794
	5.22667	0.72498	1.11573
	5.23	0.724591	1.11705
	5.23333	0.719804	1.11727
	5.23667	0.724805	1.12105
	5.24	0.72693	1.11746
	5.24333	0.726731	1.11922
	5.24667	0.728971	1.117
	5.25	0.72384	1.11814
	5.25333	0.725498	1.11576
	5.25667	0.725647	1.1214
	5.26	0.726383	1.11701
	5.26333	0.722374	1.12048
	5.26667	0.725052	1.1132
	5.27	0.727119	1.11947
	5.27333	0.72768	1.11924
	5.27667	0.728934	1.11927
	5.28	0.727341	1.11325
	5.28333	0.725055	1.12069
	5.28667	0.721955	1.12075
	5.29	0.726159	1.12082
	5.29333	0.73113	1.12213
	5.29667	0.725255	1.11958
	5.3	0.726145	1.12008
	5.30333	0.726717	1.12007
	5.30667	0.727016	1.11971
	5.31	0.731105	1.11909
	5.31333	0.729493	1.12158
	5.31667	0.726694	1.12063
	5.32	0.725907	1.11691
	5.32333	0.72775	1.12203
	5.32667	0.726063	1.12196
	5.33	0.723368	1.11894
	5.33333	0.726085	1.12278
	5.33667	0.722731	1.11922
	5.34	0.723424	1.12011
	5.34333	0.73027	1.11828
	5.34667	0.72386	1.12014
	5.35	0.723164	1.12074
	5.35333	0.726791	1.12404
	5.35667	0.729526	1.1244
	5.36	0.72796	1.12057
	5.36333	0.727968	1.12383
	5.36667	0.727638	1.11866
	5.37	0.730629	1.12224
	5.37333	0.731313	1.11864
	5.37667	0.724459	1.11868
	5.38	0.72846	1.1214
	5.38333	0.731427	1.11763
	5.38667	0.727049	1.12022
	5.39	0.727861	1.11798
	5.39333	0.725229	1.12085
	5.39667	0.726978	1.11559
	5.4	0.728116	1.12067
	5.40333	0.729423	1.12228
	5.40667	0.727393	1.12375
	5.41	0.729927	1.12115
	5.41333	0.724928	1.12143
	5.41667	0.727612	1.1186
	5.42	0.728781	1.12295
	5.42333	0.728501	1.12326
	5.42667	0.730371	1.1222
	5.43	0.731123	1.12533
	5.43333	0.730942	1.12117
	5.43667	0.730945	1.12038
	5.44	0.73118	1.12439
	5.44333	0.725654	1.12289
	5.44667	0.727263	1.11945
	5.45	0.728744	1.12102
	5.45333	0.728929	1.11782
	5.45667	0.730495	1.12155
	5.46	0.72938	1.12272
	5.46333	0.73135	1.12122
	5.46667	0.731343	1.12839
	5.47	0.731985	1.12504
	5.47333	0.731971	1.12052
	5.47667	0.733047	1.12635
	5.48	0.728148	1.12796
	5.48333	0.729356	1.12495
	5.48667	0.731721	1.1224
	5.49	0.731043	1.1211
	5.49333	0.731147	1.12821
	5.49667	0.72809	1.12505
	5.5	0.731134	1.12334
	5.50333	0.733933	1.1213
	5.50667	0.731473	1.1246
	5.51	0.730507	1.12656
	5.51333	0.730999	1.12521
	5.51667	0.726236	1.12289
	5.52	0.728892	1.12203
	5.52333	0.728884	1.12366
	5.52667	0.734646	1.12885
	5.53	0.733128	1.1237
	5.53333	0.730346	1.12688
	5.53667	0.728827	1.12452
	5.54	0.72983	1.12471
	5.54333	0.731509	1.12695
	5.54667	0.73204	1.12765
	5.55	0.733985	1.12755
	5.55333	0.72919	1.12577
	5.55667	0.730383	1.1222
	5.56	0.735329	1.12637
	5.56333	0.728549	1.12655
	5.56667	0.734446	1.13231
	5.57	0.730721	1.1279
	5.57333	0.733616	1.12661
	5.57667	0.731592	1.12621
	5.58	0.731269	1.12729
	5.58333	0.729735	1.1264
	5.58667	0.73022	1.1267
	5.59	0.734869	1.12838
	5.59333	0.731101	1.12758
	5.59667	0.728791	1.12835
	5.6	0.735991	1.12652
	5.60333	0.727752	1.12677
	5.60667	0.730752	1.12503
	5.61	0.735202	1.12987
	5.61333	0.732857	1.12763
	5.61667	0.733079	1.12776
	5.62	0.730365	1.12852
	5.62333	0.73386	1.1299
	5.62667	0.731576	1.12993
	5.63	0.730995	1.12916
	5.63333	0.736965	1.12623
	5.63667	0.731471	1.12768
	5.64	0.736044	1.12755
	5.64333	0.734061	1.12931
	5.64667	0.732524	1.12762
	5.65	0.736014	1.12747
	5.65333	0.73477	1.12813
	5.65667	0.734153	1.13125
	5.66	0.731329	1.12983
	5.66333	0.735704	1.12788
	5.66667	0.733319	1.13007
	5.67	0.736076	1.13402
	5.67333	0.73034	1.13006
	5.67667	0.731004	1.12966
	5.68	0.73156	1.12785
	5.68333	0.733312	1.13458
	5.68667	0.732284	1.12842
	5.69	0.73457	1.12674
	5.69333	0.73672	1.12839
	5.69667	0.734599	1.12991
	5.7	0.73269	1.13032
	5.70333	0.735531	1.13224
	5.70667	0.732148	1.12784
	5.71	0.732746	1.13045
	5.71333	0.735649	1.13075
	5.71667	0.733445	1.12926
	5.72	0.732252	1.1337
	5.72333	0.735349	1.13289
	5.72667	0.734734	1.13271
	5.73	0.73216	1.13691
	5.73333	0.728858	1.13098
	5.73667	0.734373	1.13003
	5.74	0.731816	1.12797
	5.74333	0.731435	1.13149
	5.74667	0.729769	1.13133
	5.75	0.735436	1.13244
	5.75333	0.732073	1.13319
	5.75667	0.736107	1.13067
	5.76	0.733273	1.12643
	5.76333	0.734948	1.12856
	5.76667	0.730758	1.13095
	5.77	0.73525	1.12992
	5.77333	0.73007	1.13404
	5.77667	0.738072	1.12925
	5.78	0.731357	1.13392
	5.78333	0.731744	1.13169
	5.78667	0.732614	1.12793
	5.79	0.735435	1.13767
	5.79333	0.735651	1.13216
	5.79667	0.73902	1.13267
	5.8	0.738932	1.12859
	5.80333	0.739011	1.12833
	5.80667	0.735718	1.13786
	5.81	0.73165	1.13433
	5.81333	0.733555	1.13204
	5.81667	0.734593	1.13475
	5.82	0.734148	1.13302
	5.82333	0.739702	1.13071
	5.82667	0.736463	1.13081
	5.83	0.735418	1.13384
	5.83333	0.736403	1.13681
	5.83667	0.734196	1.13112
	5.84	0.73401	1.13478
	5.84333	0.738489	1.13596
	5.84667	0.741829	1.13356
	5.85	0.735915	1.13211
	5.85333	0.733502	1.13318
	5.85667	0.736933	1.13295
	5.86	0.73772	1.13569
	5.86333	0.737488	1.13335
	5.86667	0.73193	1.13317
	5.87	0.738544	1.13634
	5.87333	0.733859	1.1354
	5.87667	0.737233	1.13216
	5.88	0.73543	1.13545
	5.88333	0.735085	1.1369
	5.88667	0.734746	1.13443
	5.89	0.739669	1.13726
	5.89333	0.737296	1.1323
	5.89667	0.733984	1.13359
	5.9	0.737996	1.13652
	5.90333	0.742937	1.13906
	5.90667	0.736223	1.13506
	5.91	0.735647	1.13676
	5.91333	0.736318	1.13438
	5.91667	0.741554	1.13411
	5.92	0.736139	1.13303
	5.92333	0.738032	1.13847
	5.92667	0.733696	1.13396
	5.93	0.737431	1.13435
	5.93333	0.744736	1.13653
	5.93667	0.735992	1.13735
	5.94	0.740007	1.14052
	5.94333	0.736483	1.13466
	5.94667	0.735409	1.13501
	5.95	0.736558	1.13541
	5.95333	0.741579	1.14073
	5.95667	0.736018	1.13102
	5.96	0.733356	1.13392
	5.96333	0.736598	1.13671
	5.96667	0.741515	1.13457
	5.97	0.739028	1.13815
	5.97333	0.743075	1.13556
	5.97667	0.733937	1.13782
	5.98	0.737004	1.13788
	5.98333	0.738357	1.14269
	5.98667	0.734838	1.14138
	5.99	0.736971	1.13355
	5.99333	0.733983	1.13327
	5.99667	0.740008	1.13294
	6	0.74122	1.13679
	6.00333	0.736544	1.1358
	6.00667	0.736072	1.13511
	6.01	0.741455	1.13919
	6.01333	0.736317	1.1358
	6.01667	0.737806	1.13538
	6.02	0.739463	1.13821
	6.02333	0.741215	1.14163
	6.02667	0.743093	1.14067
	6.03	0.736237	1.13561
	6.03333	0.739787	1.13972
	6.03667	0.740011	1.13316
	6.04	0.740822	1.13702
	6.04333	0.738734	1.13782
	6.04667	0.734657	1.14044
	6.05	0.738449	1.13904
	6.05333	0.737507	1.1385
	6.05667	0.736185	1.13543
	6.06	0.736253	1.13765
	6.06333	0.74244	1.13566
	6.06667	0.735411	1.14148
	6.07	0.740777	1.13923
	6.07333	0.735307	1.1382
	6.07667	0.741398	1.13982
	6.08	0.736128	1.13888
	6.08333	0.742886	1.13993
	6.08667	0.741106	1.14003
	6.09	0.740345	1.14035
	6.09333	0.739704	1.13798
	6.09667	0.73898	1.1415
	6.1	0.740022	1.13986
	6.10333	0.734861	1.14146
	6.10667	0.737889	1.14232
	6.11	0.738389	1.14544
	6.11333	0.739031	1.13895
	6.11667	0.737889	1.13664
	6.12	0.743514	1.13932
	6.12333	0.742918	1.14317
	6.12667	0.741907	1.14208
	6.13	0.742186	1.13948
	6.13333	0.73901	1.1434
	6.13667	0.737955	1.14321
	6.14	0.742633	1.14312
	6.14333	0.74138	1.13696
	6.14667	0.742873	1.14106
	6.15	0.737255	1.13947
	6.15333	0.742521	1.14296
	6.15667	0.739028	1.14387
	6.16	0.737935	1.13936
	6.16333	0.741919	1.14033
	6.16667	0.741039	1.14385
	6.17	0.741535	1.14426
	6.17333	0.741774	1.1419
	6.17667	0.742864	1.13939
	6.18	0.743289	1.14157
	6.18333	0.740408	1.14241
	6.18667	0.741116	1.14594
	6.19	0.739394	1.14475
	6.19333	0.742414	1.14383
	6.19667	0.736851	1.14265
	6.2	0.738267	1.14502
	6.20333	0.740189	1.14581
	6.20667	0.738265	1.14403
	6.21	0.745437	1.14532
	6.21333	0.740925	1.13992
	6.21667	0.739244	1.14742
	6.22	0.740965	1.14276
	6.22333	0.741325	1.14561
	6.22667	0.74386	1.14422
	6.23	0.74346	1.14171
	6.23333	0.742258	1.1419
	6.23667	0.740307	1.14454
	6.24	0.744526	1.14296
	6.24333	0.745459	1.14195
	6.24667	0.742473	1.14172
	6.25	0.741259	1.14783
	6.25333	0.747426	1.14827
	6.25667	0.741376	1.14047
	6.26	0.742288	1.14593
	6.26333	0.745118	1.1426
	6.26667	0.745437	1.14722
	6.27	0.747051	1.14609
	6.27333	0.744202	1.1449
	6.27667	0.746041	1.14703
	6.28	0.740919	1.14455
	6.28333	0.742714	1.14163
	6.28667	0.744233	1.14739
	6.29	0.743346	1.14365
	6.29333	0.748928	1.14184
	6.29667	0.741914	1.14643
	6.3	0.744566	1.14265
	6.30333	0.741837	1.14287
	6.30667	0.745115	1.14339
	6.31	0.742173	1.14558
	6.31333	0.744619	1.14742
	6.31667	0.744001	1.14444
	6.32	0.740382	1.14387
	6.32333	0.74287	1.14392
	6.32667	0.74316	1.14328
	6.33	0.747173	1.14407
	6.33333	0.745636	1.14605
	6.33667	0.744474	1.14244
	6.34	0.746148	1.14749
	6.34333	0.743266	1.14606
	6.34667	0.744424	1.14945
	6.35	0.740567	1.14737
	6.35333	0.743739	1.14823
	6.35667	0.741392	1.14502
	6.36	0.743163	1.1416
	6.36333	0.745838	1.15047
	6.36667	0.742	1.14414
	6.37	0.743992	1.14582
	6.37333	0.74376	1.14322
	6.37667	0.742505	1.14636
	6.38	0.742565	1.145
	6.38333	0.743904	1.14786
	6.38667	0.743722	1.14527
	6.39	0.744524	1.1419
	6.39333	0.741553	1.14828
	6.39667	0.74586	1.14258
	6.4	0.742103	1.14951
	6.40333	0.741766	1.14262
	6.40667	0.740515	1.14835
	6.41	0.743679	1.14868
	6.41333	0.743356	1.147
	6.41667	0.746591	1.1444
	6.42	0.740967	1.14214
	6.42333	0.745978	1.14695
	6.42667	0.746313	1.14399
	6.43	0.747393	1.14569
	6.43333	0.746538	1.14902
	6.43667	0.746611	1.14905
	6.44	0.743294	1.14808
	6.44333	0.747478	1.14463
	6.44667	0.744485	1.1507
	6.45	0.74785	1.15004
	6.45333	0.748226	1.14853
	6.45667	0.744836	1.15049
	6.46	0.744229	1.14787
	6.46333	0.742839	1.14875
	6.46667	0.746792	1.15152
	6.47	0.745355	1.14816
	6.47333	0.742145	1.15195
	6.47667	0.743525	1.14616
	6.48	0.749749	1.14653
	6.48333	0.750303	1.14692
	6.48667	0.744954	1.14844
	6.49	0.747617	1.14869
	6.49333	0.748876	1.1481
	6.49667	0.750627	1.14822
	6.5	0.746714	1.15159
	6.50333	0.746942	1.14659
	6.50667	0.747305	1.14681
	6.51	0.747855	1.15173
	6.51333	0.74795	1.14919
	6.51667	0.745537	1.1464
	6.52	0.746784	1.15074
	6.52333	0.748552	1.1479
	6.52667	0.745495	1.1476
	6.53	0.746233	1.15205
	6.53333	0.745099	1.14911
	6.53667	0.748859	1.15322
	6.54	0.74621	1.14874
	6.54333	0.744801	1.1489
	6.54667	0.747323	1.14324
	6.55	0.745881	1.14824
	6.55333	0.74683	1.14866
	6.55667	0.748687	1.14798
	6.56	0.748884	1.14949
	6.56333	0.746924	1.15164
	6.56667	0.746319	1.14983
	6.57	0.746419	1.1472
	6.57333	0.7479	1.15332
	6.57667	0.75035	1.15113
	6.58	0.747015	1.15016
	6.58333	0.743911	1.15474
	6.58667	0.747837	1.15387
	6.59	0.745617	1.14918
	6.59333	0.748646	1.15169
	6.59667	0.744739	1.15128
	6.6	0.748537	1.14976
	6.60333	0.746636	1.1529
	6.60667	0.749286	1.1499
	6.61	0.745971	1.14496
	6.61333	0.745851	1.15051
	6.61667	0.748979	1.14599
	6.62	0.753763	1.15328
	6.62333	0.746529	1.15204
	6.62667	0.746127	1.1508
	6.63	0.752396	1.14926
	6.63333	0.748094	1.15437
	6.63667	0.752805	1.15307
	6.64	0.746458	1.15031
	6.64333	0.747979	1.15342
	6.64667	0.746027	1.15355
	6.65	0.745892	1.14737
	6.65333	0.744687	1.15331
	6.65667	0.749348	1.15348
[truncated: 34,302 more rows]
