# Supplementary material for: Evolution towards simplicity in bacterial small heat shock protein system
Source: eLife. 2023 Dec 8;12:RP89813. doi: 10.7554/eLife.89813 (PMC10708888; doi:10.7554/eLife.89813)
Supplement: Figure 6—source data 4. [file elife-89813-fig6-data4.xlsx]

## Sheet: Arkusz1
			Response [nm]
		time[min]	5uM IbpA E.amylovora WT + Hsp70 repeat 1	5uM IbpA E.amylovora WT + Hsp70 repeat 2	5uM IbpA E.amylovora WT+Hsp70 repeat 3	5uM IbpA E.amylovora WT -Hsp70 repeat 1	5uM IbpA E.amylovora WT -Hsp70 repeat 2	5uM IbpA E.amylovora WT-Hsp70 repeat 3	No sHsp + Hsp70 repeat 1	No sHsp + Hsp70 repeat 2	No sHsp + Hsp70 repeat 3
		0	0.382809	0.248877	0.319704	0.175901	0.400582	0.337132	-0.016276	0.264581	0.316885
		0.003333	0.383194	0.246837	0.315183	0.180911	0.394726	0.330613	-0.0163012	0.265485	0.324148
		0.006667	0.384122	0.245292	0.317108	0.184134	0.398232	0.330315	-0.0195267	0.26774	0.324518
		0.01	0.383797	0.244541	0.317237	0.185551	0.398715	0.327985	-0.0199611	0.268298	0.3204
		0.013333	0.385321	0.244585	0.315967	0.186157	0.400031	0.3264	-0.0193396	0.268587	0.320155
		0.016667	0.386594	0.243629	0.314568	0.185558	0.402192	0.324564	-0.0196451	0.269956	0.319839
		0.02	0.388468	0.243971	0.316572	0.182337	0.402357	0.325239	-0.0173037	0.271764	0.318996
		0.023333	0.389907	0.243709	0.315527	0.18051	0.404174	0.32062	-0.0140286	0.272274	0.317972
		0.026667	0.39218	0.242968	0.313897	0.177999	0.403639	0.320161	-0.0146401	0.271048	0.320432
		0.03	0.393084	0.240898	0.315778	0.174609	0.404238	0.319999	-0.0136009	0.273107	0.320972
		0.033333	0.394171	0.242037	0.31727	0.17293	0.402221	0.322462	-0.0134907	0.274708	0.320707
		0.036667	0.393543	0.241109	0.315882	0.174639	0.405577	0.32204	-0.0132027	0.274143	0.317229
		0.04	0.392962	0.240356	0.31549	0.173923	0.401003	0.326571	-0.0155558	0.273477	0.315136
		0.043333	0.39341	0.240651	0.315969	0.177194	0.402653	0.328524	-0.013812	0.278117	0.313727
		0.046667	0.393091	0.241299	0.314916	0.177238	0.401251	0.328173	-0.0135132	0.276251	0.314046
		0.05	0.39337	0.240826	0.313125	0.178481	0.403919	0.326242	-0.0133036	0.274538	0.314292
		0.053333	0.394868	0.240287	0.3123	0.178582	0.402678	0.323401	-0.0143933	0.277394	0.318052
		0.056667	0.396538	0.240488	0.310764	0.178372	0.405646	0.322123	-0.0117747	0.281058	0.32111
		0.06	0.394645	0.241445	0.310426	0.176554	0.406193	0.320982	-0.0111697	0.27961	0.321
		0.063333	0.395329	0.241976	0.30933	0.178732	0.406883	0.325609	-0.0117901	0.282149	0.317904
		0.066667	0.394559	0.239625	0.308861	0.179382	0.403778	0.324962	-0.00795868	0.285397	0.3156
		0.07	0.395068	0.240181	0.306808	0.178836	0.405701	0.330667	-0.00784187	0.284386	0.314409
		0.073333	0.393612	0.240752	0.305649	0.179344	0.405292	0.329403	-0.00723583	0.284897	0.312101
		0.076667	0.394333	0.242496	0.306151	0.178213	0.406063	0.326887	-0.0072435	0.287135	0.310078
		0.08	0.393825	0.242504	0.304239	0.177843	0.406665	0.32069	-0.0076484	0.288342	0.311742
		0.083333	0.393831	0.245364	0.304223	0.176138	0.408271	0.320791	-0.0103726	0.286543	0.313279
		0.086667	0.392671	0.244685	0.306474	0.175873	0.406637	0.319092	-0.00970083	0.288275	0.313672
		0.09	0.39357	0.245021	0.306918	0.174295	0.404771	0.320939	-0.00847031	0.286135	0.315425
		0.093333	0.394931	0.241862	0.304798	0.174909	0.404247	0.322609	-0.00935694	0.284898	0.317699
		0.096667	0.39585	0.243444	0.304618	0.175142	0.404265	0.325193	-0.0065053	0.284816	0.317118
		0.1	0.398269	0.242246	0.304668	0.174264	0.403482	0.326407	-0.0040405	0.285726	0.315605
		0.103333	0.398984	0.24415	0.303532	0.172931	0.403846	0.324743	-0.0018141	0.286481	0.313969
		0.106667	0.401013	0.244874	0.303477	0.174504	0.406171	0.323594	-0.0028088	0.288755	0.314059
		0.11	0.403135	0.245297	0.304503	0.173975	0.406839	0.322172	0.000318	0.291157	0.312851
		0.113333	0.403497	0.243129	0.305471	0.172851	0.406654	0.31978	-0.0011575	0.290421	0.313893
		0.116667	0.404141	0.241176	0.304037	0.172256	0.408496	0.31844	-0.0017628	0.291882	0.313209
		0.12	0.405978	0.240852	0.302101	0.172577	0.408314	0.319642	-0.0014227	0.292283	0.316272
		0.123333	0.408363	0.238782	0.301448	0.173119	0.407896	0.318258	-0.0045156	0.289319	0.316714
		0.126667	0.408031	0.241206	0.298825	0.172746	0.406631	0.317959	-0.00634622	0.287846	0.317665
		0.13	0.409836	0.239471	0.29625	0.17434	0.405601	0.32061	-0.0060918	0.289871	0.316735
		0.133333	0.40987	0.241104	0.297233	0.176806	0.403238	0.319618	-0.00759223	0.288856	0.318366
		0.136667	0.407993	0.241936	0.298509	0.177998	0.402805	0.318058	-0.0100177	0.288897	0.316385
		0.14	0.407354	0.243286	0.298789	0.176683	0.402507	0.318053	-0.0059762	0.292985	0.313138
		0.143333	0.407596	0.240456	0.299842	0.178605	0.403269	0.31864	-0.0048107	0.292374	0.313025
		0.146667	0.407069	0.244706	0.302551	0.178453	0.404667	0.316252	-0.002559	0.293666	0.312537
		0.15	0.407536	0.245863	0.302316	0.178769	0.407753	0.314625	-0.0016195	0.294504	0.314668
		0.153333	0.409605	0.244047	0.302663	0.177932	0.410216	0.314659	-0.0012554	0.294408	0.314095
		0.156667	0.408466	0.244344	0.302707	0.177306	0.409341	0.315872	-0.0030944	0.293195	0.313263
		0.16	0.409639	0.246314	0.302768	0.174493	0.41003	0.315889	-0.0042578	0.296533	0.314589
		0.163333	0.410531	0.242969	0.301509	0.173061	0.410867	0.315941	-0.0057002	0.295784	0.316173
		0.166667	0.409224	0.243919	0.300795	0.171469	0.410866	0.316403	-0.0048741	0.29716	0.314148
		0.17	0.409727	0.24191	0.298422	0.171888	0.409328	0.314257	-0.0046735	0.298953	0.314559
		0.173333	0.410415	0.241936	0.297985	0.173908	0.409959	0.313267	-0.003382	0.298955	0.317423
		0.176667	0.408503	0.241431	0.296578	0.17411	0.406361	0.313405	-0.0003347	0.297168	0.315993
		0.18	0.408498	0.24272	0.296696	0.176259	0.402927	0.314637	-0.0013466	0.295926	0.312753
		0.183333	0.411687	0.240355	0.296731	0.177288	0.400549	0.31709	-0.0013527	0.295404	0.314482
		0.186667	0.410184	0.243441	0.298603	0.177384	0.396766	0.31957	-0.0015802	0.292819	0.311507
		0.19	0.409498	0.243756	0.298001	0.172797	0.394879	0.319386	-0.0022482	0.29531	0.312253
		0.193333	0.411001	0.240731	0.299468	0.171477	0.395627	0.322001	-0.0043364	0.295115	0.313437
		0.196667	0.411337	0.242825	0.299646	0.169806	0.396198	0.321349	-0.0051537	0.295512	0.316385
		0.2	0.407833	0.242094	0.299059	0.1688	0.397084	0.321078	-0.0061251	0.294117	0.315637
		0.203333	0.409618	0.241101	0.298637	0.166643	0.400849	0.322247	-0.0055699	0.295048	0.319106
		0.206667	0.409218	0.240557	0.299495	0.168359	0.400404	0.322206	-0.0054893	0.292284	0.316263
		0.21	0.408932	0.24364	0.299509	0.168461	0.401556	0.319063	-0.0041324	0.294482	0.315161
		0.213333	0.408458	0.242597	0.297638	0.166406	0.401932	0.318113	-0.0023371	0.296991	0.313587
		0.216667	0.410559	0.244336	0.299011	0.165135	0.401053	0.317632	-0.001306	0.298253	0.313271
		0.22	0.409758	0.246843	0.29877	0.16444	0.399759	0.315706	-0.0005151	0.299927	0.31182
		0.223333	0.410752	0.244791	0.298087	0.165223	0.403458	0.317512	-4.75e-05	0.302009	0.313641
		0.226667	0.410995	0.244897	0.29811	0.165584	0.404843	0.31569	-0.0012376	0.303488	0.315159
		0.23	0.410598	0.243945	0.299101	0.1671	0.405653	0.315785	-0.0017941	0.30085	0.314491
		0.233333	0.409761	0.243641	0.298734	0.16729	0.405011	0.316085	-0.0019028	0.302406	0.312809
		0.236667	0.409948	0.239839	0.298129	0.166433	0.406155	0.316625	-0.0017404	0.300607	0.31036
		0.24	0.410494	0.242826	0.29777	0.165809	0.406208	0.316795	-0.001039	0.299331	0.313705
		0.243333	0.410678	0.243095	0.295889	0.16639	0.405168	0.319502	3.51e-05	0.297113	0.309496
		0.246667	0.410187	0.242423	0.294182	0.164273	0.404557	0.318831	0.0007313	0.300914	0.308601
		0.25	0.410556	0.242942	0.293576	0.164568	0.406425	0.318246	0.0015952	0.300405	0.309661
		0.253333	0.410381	0.24366	0.293564	0.166418	0.407461	0.316126	0.0018718	0.301164	0.312201
		0.256667	0.410639	0.241974	0.29603	0.167128	0.404795	0.316205	0.0011219	0.30156	0.306696
		0.26	0.408462	0.241438	0.296673	0.166642	0.40598	0.316722	0.0012901	0.302776	0.309397
		0.263333	0.409258	0.243259	0.29882	0.166122	0.405728	0.315358	0.0019498	0.302743	0.310772
		0.266667	0.409939	0.242825	0.29889	0.166925	0.405187	0.316466	0.0004701	0.303715	0.308414
		0.27	0.410339	0.243668	0.29827	0.164516	0.403311	0.316169	0.0012614	0.303558	0.306351
		0.273333	0.409348	0.245202	0.297308	0.165739	0.404151	0.314267	0.0025739	0.305517	0.309746
		0.276667	0.410585	0.244156	0.298024	0.163486	0.402838	0.315038	0.0019226	0.305072	0.307924
		0.28	0.410388	0.242263	0.297585	0.164278	0.405013	0.31954	-0.0006359	0.303852	0.306062
		0.283333	0.409065	0.243929	0.298628	0.162614	0.405311	0.31846	0.0003209	0.303866	0.306668
		0.286667	0.409463	0.244032	0.299306	0.165589	0.406923	0.319886	-0.0012499	0.304163	0.30818
		0.29	0.410011	0.244521	0.298959	0.163108	0.406698	0.321546	-0.0014806	0.302426	0.306264
		0.293333	0.412069	0.245143	0.299105	0.163675	0.408933	0.32136	-0.0004337	0.303161	0.306903
		0.296667	0.412756	0.244562	0.299787	0.163349	0.408442	0.321459	0.0010796	0.305708	0.307487
		0.3	0.412817	0.241925	0.298726	0.163295	0.407443	0.321883	0.001058	0.305849	0.307218
		0.303333	0.411408	0.241465	0.298661	0.162143	0.40768	0.321571	0.0010186	0.306498	0.305708
		0.306667	0.412077	0.238467	0.297936	0.163048	0.409501	0.321761	0.0011437	0.309249	0.307108
		0.31	0.409705	0.238366	0.297491	0.165654	0.408052	0.321078	0.0012615	0.309213	0.30712
		0.313333	0.410352	0.239758	0.295556	0.166966	0.409599	0.319586	0.0026721	0.30652	0.306714
		0.316667	0.41179	0.242834	0.294832	0.167394	0.408716	0.318909	0.002058	0.307185	0.30863
		0.32	0.412011	0.243335	0.295175	0.16703	0.40655	0.317671	0.00444	0.307864	0.306551
		0.323333	0.412016	0.246844	0.295383	0.166423	0.405523	0.317629	0.0032391	0.30629	0.305058
		0.326667	0.412696	0.246308	0.296223	0.166697	0.404485	0.315191	0.0045023	0.306397	0.308296
		0.33	0.411797	0.246667	0.29776	0.165809	0.401189	0.315749	0.0035482	0.307964	0.309311
		0.333333	0.411764	0.243307	0.298271	0.166191	0.403007	0.315299	0.0054462	0.30806	0.308929
		0.336667	0.412997	0.24444	0.298569	0.165872	0.403121	0.31592	0.0035199	0.308797	0.314464
		0.34	0.412818	0.24154	0.298448	0.166573	0.404711	0.315207	0.0064981	0.310029	0.315514
		0.343333	0.413527	0.243873	0.297587	0.165697	0.404433	0.316024	0.0055656	0.310803	0.313758
		0.346667	0.413144	0.244999	0.297759	0.166921	0.403372	0.314316	0.007657	0.31164	0.312975
		0.35	0.412249	0.245683	0.297402	0.166523	0.402194	0.316508	0.006634	0.312528	0.31541
		0.353333	0.411048	0.244835	0.29805	0.167109	0.401748	0.317523	0.0084558	0.311849	0.312229
		0.356667	0.4105	0.244377	0.297539	0.165631	0.400176	0.313194	0.0068942	0.310993	0.309304
		0.36	0.410154	0.242802	0.298507	0.165331	0.400182	0.314126	0.0055746	0.312706	0.309021
		0.363333	0.410818	0.241241	0.297435	0.163709	0.400949	0.316694	0.006015	0.311205	0.309443
		0.366667	0.412251	0.241895	0.298003	0.163289	0.402846	0.315886	0.0053967	0.308723	0.303472
		0.37	0.41452	0.242575	0.296905	0.162811	0.402574	0.316369	0.0058318	0.309627	0.305833
		0.373333	0.414756	0.243713	0.297152	0.163628	0.402867	0.317913	0.0050495	0.310611	0.307183
		0.376667	0.414334	0.244599	0.295107	0.162278	0.403256	0.316167	0.0079575	0.310918	0.304601
		0.38	0.414242	0.243057	0.294312	0.162945	0.404542	0.314519	0.0065057	0.312423	0.306939
		0.383333	0.413026	0.244079	0.29414	0.162502	0.401945	0.31334	0.0076473	0.315185	0.308096
		0.386667	0.410346	0.241261	0.29433	0.163679	0.40497	0.31195	0.0062495	0.315133	0.30702
		0.39	0.410763	0.240754	0.294663	0.163858	0.40454	0.311508	0.0076134	0.314963	0.305595
		0.393333	0.411373	0.239473	0.295814	0.164717	0.405428	0.312601	0.0060037	0.31432	0.308499
		0.396667	0.410247	0.242784	0.296131	0.163569	0.405762	0.311784	0.0053471	0.312335	0.306328
		0.4	0.409949	0.239684	0.296463	0.164647	0.407671	0.309853	0.005716	0.313038	0.306727
		0.403333	0.411144	0.241699	0.295936	0.164305	0.40485	0.310074	0.0074538	0.314611	0.305596
		0.406667	0.410282	0.243277	0.295623	0.163519	0.402582	0.309126	0.0075389	0.31408	0.308335
		0.41	0.4098	0.243648	0.295528	0.162698	0.399311	0.308899	0.0084043	0.313226	0.307035
		0.413333	0.41069	0.241929	0.296899	0.163987	0.400163	0.307686	0.0097884	0.314691	0.30618
		0.416667	0.410447	0.24411	0.297108	0.164819	0.400994	0.308464	0.0092744	0.315042	0.307619
		0.42	0.410155	0.244419	0.297469	0.164278	0.403919	0.306653	0.0084609	0.313729	0.309571
		0.423333	0.411325	0.243888	0.297877	0.163042	0.406078	0.308997	0.0078107	0.314366	0.307886
		0.426667	0.411503	0.243969	0.297312	0.163135	0.410234	0.308399	0.007744	0.314749	0.308413
		0.43	0.409814	0.241969	0.296066	0.161963	0.409106	0.307301	0.006664	0.314776	0.308937
		0.433333	0.410164	0.241263	0.29598	0.160374	0.409041	0.308984	0.0066543	0.315603	0.307406
		0.436667	0.410024	0.240001	0.296918	0.161493	0.405998	0.310064	0.0082275	0.316782	0.303834
		0.44	0.408139	0.23858	0.296491	0.162082	0.408395	0.312144	0.0089705	0.316299	0.304522
		0.443333	0.409199	0.236587	0.297914	0.163699	0.408002	0.310861	0.0076479	0.31891	0.302476
		0.446667	0.410619	0.238584	0.299266	0.163705	0.406506	0.311977	0.0084813	0.319543	0.302168
		0.45	0.409771	0.238907	0.299475	0.16493	0.404396	0.311531	0.0090006	0.318133	0.303934
		0.453333	0.409822	0.240061	0.299525	0.163931	0.403832	0.311136	0.0087045	0.321123	0.305637
		0.456667	0.410557	0.24174	0.300292	0.164993	0.399945	0.30917	0.0089116	0.321975	0.304193
		0.46	0.410844	0.242299	0.299208	0.163379	0.398978	0.310061	0.0104773	0.319665	0.30625
		0.463333	0.410602	0.24081	0.299256	0.164196	0.400477	0.309782	0.0109975	0.320242	0.304682
		0.466667	0.411564	0.240163	0.299503	0.16361	0.401903	0.308899	0.0109245	0.323451	0.303903
		0.47	0.412569	0.239374	0.298903	0.161132	0.403074	0.312099	0.0118964	0.321404	0.303545
		0.473333	0.412775	0.238971	0.297796	0.160868	0.404758	0.31093	0.0105014	0.322328	0.30432
		0.476667	0.411666	0.239435	0.298374	0.161905	0.404238	0.31186	0.0092891	0.325058	0.302361
		0.48	0.411785	0.241671	0.298287	0.162945	0.404689	0.313714	0.0088779	0.322746	0.305233
		0.483333	0.410881	0.241017	0.297042	0.162517	0.404169	0.314343	0.0088671	0.319826	0.305578
		0.486667	0.409653	0.24028	0.296816	0.165856	0.404638	0.313508	0.0073051	0.319082	0.306464
		0.49	0.410146	0.238654	0.297043	0.165955	0.40727	0.31337	0.0080395	0.31929	0.305883
		0.493333	0.409343	0.238534	0.295773	0.164858	0.40794	0.313475	0.0096632	0.317574	0.305778
		0.496667	0.409098	0.237364	0.294732	0.162319	0.4064	0.311477	0.0093437	0.319081	0.304533
		0.5	0.016428	0.013523	0.063144	0.042182	0	0.023111	0.0120482	0.075844	0.077871
		0.503333	0	0	0.002786	0	0.000349	0	0	0.04057	0.032767
		0.506667	0.03167	0.007758	0	0.011618	0.02846	0.001611	0.0004822	0.02964	0.011748
		0.51	0.052715	0.006891	0.012882	0.023016	0.054317	0.016386	0.0081914	0.013898	0.022595
		0.513333	0.103938	0.011944	0.037127	0.037479	0.079107	0.028164	0.0058752	0.013979	0.010674
		0.516667	0.125932	0.018084	0.036434	0.046991	0.105062	0.035142	0.004287	0	0
		0.52	0.161436	0.028616	0.061524	0.07531	0.135173	0.052528	0.0054719	-0.002451	0.00044
		0.523333	0.1913	0.039873	0.084874	0.101769	0.162436	0.071376	0.0067865	-0.005349	-0.000335
		0.526667	0.222901	0.052738	0.109429	0.129029	0.194475	0.091311	0.0055227	-0.006197	-0.002886
		0.53	0.242288	0.066355	0.131807	0.156236	0.221915	0.10968	0.0074591	-0.007295	-0.002688
		0.533333	0.262833	0.076097	0.155317	0.179318	0.24991	0.130079	0.0082626	-0.008138	-0.003844
		0.536667	0.282791	0.090299	0.17992	0.201518	0.278604	0.152448	0.0099005	-0.007204	-0.002468
		0.54	0.304009	0.102576	0.205217	0.223084	0.307819	0.171235	0.0106674	-0.006023	1.8e-05
		0.543333	0.325378	0.115808	0.228499	0.243151	0.331816	0.188602	0.0119205	-0.004998	0.001515
		0.546667	0.349727	0.128345	0.253085	0.262614	0.360528	0.208816	0.0122184	-0.003435	0.002742
		0.55	0.374573	0.140911	0.277212	0.286369	0.383821	0.227054	0.0145673	-4e-05	0.004477
		0.553333	0.399256	0.151807	0.302002	0.307952	0.413268	0.245194	0.0153471	0.001608	0.004673
		0.556667	0.422313	0.164988	0.325649	0.325512	0.438443	0.261393	0.0164046	0.003594	0.005787
		0.56	0.445376	0.175803	0.348528	0.349187	0.462654	0.279105	0.0169973	0.007074	0.005843
		0.563333	0.467765	0.188441	0.369093	0.371346	0.484186	0.294933	0.0174641	0.008026	0.008235
		0.566667	0.489004	0.202405	0.391307	0.39157	0.506111	0.311046	0.0176838	0.008904	0.011612
		0.57	0.505575	0.213788	0.415246	0.412363	0.529703	0.32835	0.0186527	0.011622	0.012939
		0.573333	0.525169	0.224894	0.432309	0.434238	0.549005	0.34665	0.0188817	0.013446	0.015445
		0.576667	0.543229	0.23804	0.451332	0.451331	0.567019	0.362962	0.0215088	0.014902	0.016275
		0.58	0.563699	0.249973	0.471096	0.469344	0.587243	0.381882	0.0226343	0.017307	0.01622
		0.583333	0.581642	0.259227	0.488159	0.487314	0.606108	0.396915	0.0234086	0.018425	0.01762
		0.586667	0.603618	0.27061	0.506096	0.505986	0.627311	0.412302	0.0260391	0.018696	0.020049
		0.59	0.623288	0.28281	0.526013	0.523091	0.645901	0.427364	0.0277917	0.019038	0.022189
		0.593333	0.64338	0.295039	0.542915	0.538898	0.666712	0.441192	0.0278551	0.021406	0.025657
		0.596667	0.660983	0.305547	0.558129	0.554894	0.684437	0.451653	0.0288456	0.023133	0.028832
		0.6	0.678258	0.317042	0.574126	0.571627	0.70252	0.46824	0.0295794	0.025369	0.029727
		0.603333	0.693916	0.329892	0.590703	0.58697	0.720757	0.483168	0.0298739	0.029106	0.033582
		0.606667	0.710327	0.339144	0.603579	0.601648	0.73556	0.495548	0.0310394	0.031907	0.035289
		0.61	0.725407	0.349537	0.61707	0.616903	0.748904	0.507801	0.0319103	0.034074	0.037615
		0.613333	0.738978	0.35933	0.631761	0.634812	0.762802	0.522585	0.0334634	0.035427	0.039096
		0.616667	0.753076	0.369873	0.645909	0.651343	0.77569	0.530909	0.0344842	0.037704	0.040848
		0.62	0.764344	0.378322	0.658607	0.667142	0.789895	0.543911	0.0348536	0.039584	0.040804
		0.623333	0.776937	0.388464	0.671851	0.681056	0.801467	0.555478	0.0351117	0.041983	0.042593
		0.626667	0.787836	0.397881	0.684799	0.694757	0.814883	0.565738	0.0359638	0.043658	0.045298
		0.63	0.799429	0.408465	0.696342	0.704883	0.827977	0.576538	0.0352617	0.045723	0.04751
		0.633333	0.812076	0.418982	0.707926	0.716657	0.839996	0.590483	0.0352071	0.047656	0.048643
		0.636667	0.826199	0.427587	0.720306	0.729842	0.851568	0.601816	0.0350399	0.047879	0.050733
		0.64	0.835601	0.436659	0.730998	0.743175	0.864172	0.612481	0.0358042	0.048904	0.051904
		0.643333	0.845794	0.444834	0.740129	0.753263	0.874623	0.624411	0.036409	0.049821	0.052535
		0.646667	0.856798	0.453758	0.74949	0.763717	0.885735	0.633877	0.0380327	0.052817	0.054026
		0.65	0.863053	0.461596	0.758754	0.773396	0.899755	0.641433	0.0391514	0.053634	0.055039
		0.653333	0.871547	0.470714	0.769561	0.785472	0.912235	0.651987	0.0404607	0.056021	0.055962
		0.656667	0.880522	0.478282	0.779022	0.796901	0.923027	0.661583	0.0400504	0.056955	0.057282
		0.66	0.886373	0.48612	0.789421	0.808679	0.933603	0.670397	0.0405822	0.057983	0.060803
		0.663333	0.893819	0.49371	0.7989	0.820755	0.942503	0.679936	0.0416802	0.058364	0.062887
		0.666667	0.90236	0.501046	0.807185	0.833159	0.949436	0.69008	0.042131	0.060503	0.065268
		0.67	0.910403	0.509975	0.815796	0.840367	0.958491	0.698493	0.040844	0.060801	0.067278
		0.673333	0.91912	0.518898	0.825199	0.849072	0.969042	0.708322	0.0422663	0.062099	0.071182
		0.676667	0.927393	0.526888	0.834396	0.859308	0.977534	0.71808	0.0432583	0.064979	0.07005
		0.68	0.936504	0.5348	0.841885	0.869994	0.986265	0.726518	0.0420242	0.066227	0.071562
		0.683333	0.942466	0.543612	0.850741	0.878759	0.994216	0.734545	0.0421679	0.068964	0.072688
		0.686667	0.947762	0.549959	0.859797	0.892351	1.00468	0.745634	0.0443799	0.069894	0.073501
		0.69	0.954039	0.556646	0.866438	0.902141	1.01212	0.753211	0.0447428	0.073454	0.074601
		0.693333	0.963742	0.563934	0.872561	0.9121	1.0193	0.760205	0.0445801	0.075731	0.076659
		0.696667	0.969398	0.568421	0.879202	0.91758	1.0265	0.767302	0.0460233	0.078075	0.076762
		0.7	0.980578	0.574066	0.885734	0.922408	1.03512	0.774925	0.0465708	0.079337	0.078738
		0.703333	0.988342	0.582035	0.893931	0.930254	1.04043	0.783465	0.0463985	0.082987	0.081043
		0.706667	0.996562	0.588848	0.899902	0.936832	1.04781	0.78986	0.0465436	0.083633	0.080267
		0.71	1.00114	0.595747	0.907035	0.944739	1.05629	0.797912	0.0463435	0.084474	0.080928
		0.713333	1.0072	0.603754	0.914071	0.958298	1.06424	0.805041	0.0455448	0.085704	0.083802
		0.716667	1.01012	0.609007	0.919314	0.968523	1.07029	0.812181	0.0462694	0.086423	0.084189
		0.72	1.01718	0.615699	0.924438	0.973546	1.07707	0.818843	0.0475785	0.084874	0.085336
		0.723333	1.02236	0.623194	0.930559	0.980237	1.08269	0.827228	0.0485994	0.086838	0.088132
		0.726667	1.02895	0.628097	0.936851	0.988145	1.08681	0.832401	0.0493636	0.088464	0.090362
		0.73	1.03632	0.63416	0.942706	0.986795	1.09113	0.838064	0.0510232	0.089858	0.090864
		0.733333	1.04423	0.639773	0.949116	0.994233	1.09724	0.845703	0.0515669	0.092293	0.094278
		0.736667	1.04959	0.64519	0.955786	1.00676	1.10729	0.851864	0.0508819	0.09438	0.095982
		0.74	1.05542	0.650171	0.96127	1.01131	1.1116	0.855493	0.0519181	0.095874	0.096588
		0.743333	1.06197	0.657137	0.96598	1.01594	1.1189	0.863836	0.0533124	0.096814	0.098077
		0.746667	1.06923	0.663806	0.971278	1.02302	1.12498	0.871013	0.054124	0.098278	0.100395
		0.75	1.07775	0.670314	0.976182	1.02776	1.12923	0.874913	0.0555471	0.099228	0.101538
		0.753333	1.08332	0.674423	0.980232	1.0298	1.13108	0.880366	0.0587336	0.10147	0.102121
		0.756667	1.08928	0.679451	0.98614	1.03751	1.13777	0.887353	0.0602479	0.102353	0.102903
		0.76	1.09728	0.684114	0.990114	1.04503	1.14151	0.891936	0.0612536	0.103373	0.104094
		0.763333	1.10059	0.686588	0.995371	1.05369	1.14763	0.898652	0.0613613	0.104606	0.105543
		0.766667	1.10275	0.690902	1.00094	1.06055	1.15251	0.905356	0.0629298	0.105923	0.105875
		0.77	1.10685	0.695223	1.00714	1.06597	1.15786	0.910124	0.0629445	0.106778	0.108345
		0.773333	1.11302	0.70074	1.0113	1.0692	1.16292	0.916411	0.0623964	0.108629	0.109852
		0.776667	1.11702	0.705242	1.01476	1.07214	1.17027	0.920471	0.0642494	0.10844	0.111377
		0.78	1.12221	0.710982	1.01722	1.07369	1.1723	0.925104	0.0677493	0.110323	0.112626
		0.783333	1.12532	0.715995	1.02061	1.07643	1.17646	0.928979	0.0681672	0.111785	0.113985
		0.786667	1.12968	0.719424	1.0248	1.0828	1.1812	0.937273	0.0688751	0.111991	0.11287
		0.79	1.13337	0.722567	1.02893	1.09227	1.18583	0.940947	0.0705247	0.112488	0.115227
		0.793333	1.13563	0.726023	1.03424	1.09391	1.18792	0.94676	0.0705033	0.116061	0.116052
		0.796667	1.13923	0.732675	1.03922	1.09831	1.1931	0.952039	0.0700378	0.114972	0.116066
		0.8	1.14434	0.736462	1.0433	1.10357	1.19786	0.957218	0.0695915	0.114698	0.116764
		0.803333	1.14858	0.740905	1.04698	1.1083	1.20285	0.960643	0.0701028	0.117794	0.12017
		0.806667	1.14981	0.74468	1.04997	1.10969	1.205	0.965264	0.0710192	0.120219	0.122281
		0.81	1.15242	0.749934	1.0554	1.11306	1.20864	0.970439	0.0712575	0.119213	0.122551
		0.813333	1.15739	0.752558	1.06022	1.11619	1.21245	0.97383	0.0719612	0.121164	0.124738
		0.816667	1.16051	0.757976	1.06248	1.12522	1.21488	0.977386	0.0727386	0.121868	0.126527
		0.82	1.16467	0.763864	1.06724	1.12604	1.21867	0.98238	0.074542	0.122606	0.127477
		0.823333	1.16935	0.769254	1.07101	1.12876	1.22124	0.987338	0.0734112	0.122618	0.127866
		0.826667	1.17542	0.773266	1.07328	1.13358	1.22332	0.990977	0.0741566	0.12427	0.129522
		0.83	1.17745	0.776297	1.0764	1.13941	1.2271	0.994254	0.0737441	0.125384	0.130668
		0.833333	1.18295	0.780234	1.08053	1.13843	1.23341	0.999941	0.0747395	0.12805	0.13208
		0.836667	1.18706	0.783107	1.08357	1.14998	1.23641	1.00283	0.0729301	0.128342	0.1323
		0.84	1.19131	0.786664	1.08661	1.15152	1.24174	1.00795	0.0750781	0.129775	0.132632
		0.843333	1.19278	0.791192	1.0897	1.15649	1.24634	1.01027	0.074819	0.130949	0.133651
		0.846667	1.19684	0.796231	1.09264	1.15905	1.24962	1.01409	0.0750225	0.132532	0.133558
		0.85	1.19831	0.799584	1.09633	1.16127	1.24932	1.01556	0.0759023	0.13212	0.134224
		0.853333	1.20059	0.804345	1.10123	1.16444	1.25577	1.01934	0.0780321	0.133137	0.135117
		0.856667	1.20259	0.807646	1.10523	1.17136	1.25646	1.02059	0.0784747	0.134695	0.136087
		0.86	1.2073	0.810268	1.10866	1.17501	1.25886	1.02747	0.0799027	0.135039	0.137178
		0.863333	1.21052	0.813537	1.11211	1.17955	1.26166	1.03268	0.0817539	0.137169	0.13966
		0.866667	1.21428	0.816481	1.11502	1.18087	1.26482	1.03869	0.0828762	0.14013	0.139697
		0.87	1.21814	0.819714	1.11665	1.1826	1.26462	1.04543	0.0822227	0.142415	0.14116
		0.873333	1.22157	0.823468	1.11956	1.18557	1.26871	1.05042	0.0819457	0.141993	0.142116
		0.876667	1.22462	0.827049	1.12099	1.18724	1.27175	1.05194	0.0807192	0.143221	0.141808
		0.88	1.22719	0.829941	1.12306	1.19166	1.27427	1.05318	0.0804238	0.143289	0.14188
		0.883333	1.23006	0.833247	1.12625	1.19673	1.27876	1.0552	0.0804385	0.143626	0.14403
		0.886667	1.23188	0.836521	1.13033	1.19968	1.28263	1.0578	0.0813689	0.143506	0.143987
		0.89	1.23566	0.83902	1.13369	1.20299	1.28526	1.05954	0.0818781	0.144905	0.147202
		0.893333	1.23808	0.840806	1.13748	1.20791	1.29009	1.06413	0.0832162	0.146201	0.149557
		0.896667	1.2423	0.845808	1.14043	1.21081	1.29513	1.06841	0.0835402	0.148114	0.152019
		0.9	1.24547	0.848578	1.14331	1.21402	1.29767	1.07295	0.0837225	0.14871	0.153254
		0.903333	1.24742	0.851677	1.14633	1.21506	1.30054	1.07618	0.08411	0.148059	0.155622
		0.906667	1.25148	0.854252	1.14843	1.21774	1.30398	1.08045	0.0837235	0.149442	0.153623
		0.91	1.25586	0.86006	1.1509	1.22102	1.30545	1.08175	0.08415	0.150405	0.154549
		0.913333	1.25806	0.861758	1.15417	1.22255	1.305	1.08657	0.0833784	0.149502	0.154203
		0.916667	1.2606	0.864172	1.15626	1.22665	1.30704	1.0865	0.085056	0.150629	0.154017
		0.92	1.26607	0.868604	1.15904	1.22911	1.31017	1.08991	0.085768	0.15341	0.15367
		0.923333	1.26786	0.871518	1.16102	1.23108	1.31163	1.09078	0.086244	0.153552	0.154803
		0.926667	1.2695	0.873726	1.16447	1.23182	1.31411	1.09418	0.086974	0.154099	0.155611
		0.93	1.27195	0.877359	1.16524	1.23525	1.31543	1.09281	0.089298	0.155071	0.157218
		0.933333	1.27228	0.88214	1.16882	1.23732	1.31602	1.09744	0.087174	0.156132	0.157329
		0.936667	1.27161	0.883071	1.17231	1.2423	1.31635	1.09917	0.088441	0.157423	0.157793
		0.94	1.27448	0.886756	1.1754	1.2431	1.32083	1.1015	0.089097	0.159231	0.158386
		0.943333	1.27598	0.888574	1.17698	1.24581	1.32232	1.10253	0.089546	0.15987	0.159843
		0.946667	1.27929	0.890757	1.18167	1.24743	1.32689	1.10659	0.089311	0.162752	0.159983
		0.95	1.2836	0.89333	1.18362	1.25028	1.3308	1.10766	0.09015	0.163034	0.1621
		0.953333	1.28621	0.89573	1.18534	1.25098	1.33365	1.11188	0.090377	0.163324	0.164222
		0.956667	1.28665	0.897689	1.18738	1.2553	1.33459	1.11555	0.090087	0.163459	0.165225
		0.96	1.28976	0.89996	1.19068	1.25806	1.33622	1.11775	0.090128	0.165313	0.165274
		0.963333	1.28934	0.903009	1.19178	1.26042	1.33673	1.12011	0.090693	0.164368	0.164552
		0.966667	1.28941	0.905701	1.19411	1.26084	1.34106	1.12251	0.090883	0.165108	0.165594
		0.97	1.29323	0.908613	1.19595	1.26577	1.34264	1.12535	0.089539	0.167199	0.165192
		0.973333	1.29661	0.910706	1.19905	1.26749	1.34462	1.1272	0.090552	0.167328	0.165426
		0.976667	1.29501	0.913063	1.2001	1.26994	1.34717	1.13081	0.091508	0.168052	0.166273
		0.98	1.29895	0.914321	1.20198	1.27071	1.3498	1.13222	0.09178	0.168658	0.168162
		0.983333	1.30208	0.916376	1.20349	1.2748	1.35051	1.13668	0.092403	0.169256	0.16909
		0.986667	1.30335	0.918193	1.20536	1.27422	1.3532	1.13783	0.093477	0.168695	0.169194
		0.99	1.30478	0.921567	1.20655	1.27761	1.35534	1.13915	0.093323	0.170398	0.168714
		0.993333	1.31161	0.926638	1.2089	1.27935	1.35672	1.14139	0.092655	0.170732	0.169783
		0.996667	1.31188	0.929657	1.21118	1.28417	1.35863	1.14617	0.092535	0.172585	0.170881
		1	1.31357	0.931256	1.21324	1.28355	1.36107	1.14868	0.093824	0.174741	0.171356
		1.00333	1.31681	0.934222	1.21589	1.2876	1.36346	1.15095	0.093889	0.175353	0.17406
		1.00667	1.31933	0.935282	1.21838	1.28854	1.36474	1.15488	0.095799	0.176476	0.176612
		1.01	1.31873	0.936645	1.2213	1.28972	1.36951	1.15822	0.09647	0.176768	0.178047
		1.01333	1.31946	0.93865	1.22281	1.28988	1.37046	1.15928	0.096767	0.177858	0.17895
		1.01667	1.31949	0.941657	1.22459	1.29065	1.37051	1.15943	0.097342	0.177689	0.179154
		1.02	1.31862	0.94343	1.22676	1.29257	1.37471	1.16082	0.097817	0.178692	0.18022
		1.02333	1.31761	0.947291	1.22762	1.29558	1.37752	1.16414	0.097201	0.179169	0.183035
		1.02667	1.32044	0.949481	1.22879	1.2984	1.37645	1.16512	0.098875	0.180793	0.183022
		1.03	1.32518	0.952335	1.23076	1.30031	1.38091	1.16783	0.098692	0.18139	0.184363
		1.03333	1.33003	0.954558	1.23169	1.3053	1.38357	1.16976	0.098788	0.182482	0.185692
		1.03667	1.333	0.956126	1.23336	1.306	1.38256	1.17153	0.099287	0.183376	0.185
		1.04	1.33909	0.957207	1.23662	1.30755	1.38332	1.17321	0.097863	0.185992	0.183563
		1.04333	1.34368	0.957255	1.23856	1.3106	1.38507	1.17433	0.096038	0.188416	0.183022
		1.04667	1.34523	0.95726	1.24027	1.31066	1.38606	1.17563	0.095667	0.188949	0.182369
		1.05	1.34631	0.958111	1.24413	1.31091	1.38707	1.17911	0.095938	0.189833	0.183445
		1.05333	1.34762	0.959437	1.24395	1.31492	1.3905	1.18396	0.096749	0.190727	0.186054
		1.05667	1.34903	0.962308	1.24488	1.31451	1.39278	1.18504	0.100347	0.190112	0.187332
		1.06	1.34815	0.966422	1.24577	1.31538	1.39342	1.18842	0.1003	0.189798	0.189263
		1.06333	1.34853	0.969807	1.24976	1.32129	1.39401	1.1887	0.100346	0.190939	0.190741
		1.06667	1.3503	0.974216	1.24981	1.32311	1.39806	1.18766	0.10023	0.192826	0.189503
		1.07	1.35146	0.976858	1.25349	1.32282	1.39878	1.19037	0.098288	0.193625	0.186955
		1.07333	1.35042	0.979517	1.25603	1.32502	1.39994	1.1933	0.096266	0.194937	0.186205
		1.07667	1.35161	0.980609	1.25871	1.3258	1.40346	1.19392	0.097602	0.195297	0.187614
		1.08	1.35326	0.98094	1.25931	1.32466	1.40523	1.19474	0.097103	0.197099	0.188416
		1.08333	1.35495	0.98157	1.26186	1.32828	1.40441	1.19811	0.09804	0.19698	0.190204
		1.08667	1.35807	0.984522	1.26465	1.329	1.40644	1.19815	0.098989	0.198056	0.191829
		1.09	1.36077	0.985772	1.26604	1.32877	1.40771	1.19736	0.099231	0.198064	0.194287
		1.09333	1.36325	0.98815	1.2669	1.3313	1.40848	1.19708	0.099363	0.199182	0.193141
		1.09667	1.36757	0.990243	1.26785	1.33421	1.41118	1.20149	0.101524	0.198895	0.194107
		1.1	1.37133	0.990623	1.26907	1.3354	1.41364	1.20465	0.100087	0.199119	0.194597
		1.10333	1.37502	0.992581	1.27041	1.33756	1.41535	1.2072	0.100274	0.199796	0.196337
		1.10667	1.37775	0.993051	1.27166	1.34195	1.41621	1.21032	0.100873	0.200662	0.197052
		1.11	1.37921	0.99217	1.27326	1.34384	1.41823	1.21481	0.099822	0.201455	0.199815
		1.11333	1.37784	0.994272	1.27478	1.34503	1.41911	1.2176	0.100418	0.202174	0.199609
		1.11667	1.3778	0.996236	1.27562	1.34337	1.42004	1.21997	0.103068	0.203789	0.202329
		1.12	1.37562	0.997167	1.27598	1.34507	1.42175	1.22068	0.103643	0.204018	0.202769
		1.12333	1.37672	0.999386	1.27837	1.347	1.4239	1.22218	0.104716	0.205418	0.202941
		1.12667	1.37827	1.00418	1.27833	1.34689	1.42534	1.22459	0.10579	0.205735	0.202028
		1.13	1.37986	1.00573	1.28005	1.34978	1.42692	1.2259	0.105454	0.206541	0.203736
		1.13333	1.38206	1.0075	1.28124	1.35205	1.42877	1.22634	0.102802	0.206747	0.20109
		1.13667	1.38173	1.0096	1.28379	1.35294	1.42986	1.22916	0.104794	0.207867	0.201407
		1.14	1.38166	1.01061	1.28371	1.35292	1.43135	1.23224	0.103242	0.208478	0.20252
		1.14333	1.38122	1.01076	1.28702	1.35391	1.43266	1.23411	0.102759	0.209607	0.204025
		1.14667	1.38298	1.01249	1.28775	1.35284	1.43465	1.23586	0.102807	0.21179	0.204138
		1.15	1.38366	1.01437	1.29064	1.35394	1.43544	1.23584	0.103628	0.212298	0.206528
		1.15333	1.39	1.01714	1.2905	1.35615	1.43696	1.23525	0.102375	0.212906	0.206641
		1.15667	1.39244	1.01926	1.29247	1.35634	1.4391	1.23672	0.103585	0.213829	0.206162
		1.16	1.39383	1.02093	1.29319	1.3575	1.44125	1.23764	0.104097	0.213878	0.206649
		1.16333	1.39522	1.02296	1.29455	1.35936	1.44199	1.2376	0.103987	0.212269	0.206512
		1.16667	1.39376	1.02402	1.29565	1.36265	1.44328	1.24103	0.104581	0.212769	0.205972
		1.17	1.39235	1.02454	1.29751	1.36266	1.44463	1.24417	0.104599	0.212308	0.206841
		1.17333	1.392	1.02583	1.29952	1.36436	1.4454	1.24479	0.103935	0.213069	0.207579
		1.17667	1.39464	1.02777	1.29993	1.36534	1.44541	1.24678	0.104345	0.21519	0.207319
		1.18	1.39613	1.02836	1.30199	1.36639	1.44667	1.24775	0.105947	0.216127	0.206684
		1.18333	1.39993	1.03042	1.30185	1.36688	1.44717	1.24721	0.106268	0.216712	0.209223
		1.18667	1.40154	1.03275	1.30367	1.36881	1.45053	1.24905	0.106205	0.218729	0.210084
		1.19	1.40424	1.03492	1.30409	1.37323	1.45256	1.25178	0.106771	0.218375	0.209823
		1.19333	1.40505	1.03658	1.30669	1.37459	1.45352	1.25026	0.107707	0.217601	0.210248
		1.19667	1.40853	1.03799	1.30717	1.37708	1.455	1.25275	0.10621	0.216761	0.212548
		1.2	1.40966	1.04033	1.30945	1.37663	1.45815	1.25538	0.105955	0.219225	0.213123
		1.20333	1.40999	1.04126	1.31185	1.37987	1.45769	1.25515	0.108873	0.22035	0.213643
		1.20667	1.41054	1.04414	1.31283	1.38164	1.45868	1.25743	0.109583	0.221172	0.21541
		1.21	1.41041	1.04555	1.31334	1.38364	1.45941	1.25984	0.108948	0.222315	0.215995
		1.21333	1.40827	1.04687	1.31546	1.38446	1.45971	1.26149	0.109976	0.224352	0.214618
		1.21667	1.40925	1.04659	1.3157	1.3866	1.46009	1.26369	0.110756	0.224271	0.213428
		1.22	1.41292	1.04733	1.31649	1.38605	1.46204	1.26661	0.109431	0.223597	0.214265
		1.22333	1.41613	1.04632	1.31873	1.38434	1.46176	1.26613	0.109078	0.222935	0.214504
		1.22667	1.42057	1.04793	1.32018	1.38579	1.46404	1.26875	0.110119	0.2227	0.215549
		1.23	1.42291	1.04996	1.32166	1.3861	1.46639	1.26933	0.109938	0.224751	0.217665
		1.23333	1.4237	1.05272	1.32426	1.3869	1.46765	1.27112	0.110635	0.223889	0.219025
		1.23667	1.42226	1.0536	1.32494	1.38932	1.46811	1.27271	0.109789	0.225562	0.218694
		1.24	1.41952	1.05524	1.32659	1.38945	1.47076	1.27289	0.110711	0.227265	0.220214
		1.24333	1.41806	1.05639	1.32818	1.39113	1.47435	1.27285	0.111247	0.227508	0.220583
		1.24667	1.42047	1.05785	1.32839	1.3907	1.47389	1.27348	0.112206	0.226649	0.220302
		1.25	1.42118	1.05879	1.32895	1.39274	1.47629	1.27204	0.111572	0.226939	0.220825
		1.25333	1.42361	1.06102	1.32991	1.39247	1.47695	1.27011	0.112431	0.225903	0.22214
		1.25667	1.42609	1.06266	1.3318	1.39438	1.47779	1.27124	0.110616	0.227304	0.220288
		1.26	1.4279	1.0638	1.33178	1.39303	1.47805	1.27316	0.111779	0.229236	0.220495
		1.26333	1.426	1.06387	1.33333	1.39621	1.4801	1.27364	0.111415	0.230121	0.22251
		1.26667	1.42821	1.06416	1.33577	1.39493	1.48001	1.27408	0.111368	0.231996	0.221215
		1.27	1.42907	1.06607	1.33696	1.39818	1.48202	1.27824	0.110783	0.231948	0.221231
		1.27333	1.43017	1.06737	1.33746	1.39945	1.48478	1.28063	0.112136	0.231326	0.223333
		1.27667	1.43248	1.06877	1.33942	1.40133	1.48432	1.2799	0.111321	0.23169	0.22312
		1.28	1.43587	1.07052	1.34008	1.40107	1.48553	1.28304	0.112962	0.23157	0.222336
		1.28333	1.43533	1.07259	1.34093	1.40376	1.48568	1.28387	0.113543	0.232385	0.223933
		1.28667	1.43419	1.0718	1.34139	1.40453	1.48892	1.28377	0.11385	0.234692	0.224864
		1.29	1.43565	1.07232	1.34154	1.40876	1.48759	1.2859	0.115086	0.234869	0.222534
		1.29333	1.43366	1.07361	1.34218	1.40961	1.49027	1.28836	0.115248	0.23384	0.223015
		1.29667	1.43544	1.0761	1.34425	1.41426	1.49054	1.28922	0.115035	0.234392	0.224818
		1.3	1.43726	1.07641	1.34567	1.41281	1.49114	1.29314	0.114452	0.233469	0.224789
		1.30333	1.43865	1.07785	1.34754	1.41717	1.4913	1.29695	0.115684	0.233894	0.224781
		1.30667	1.44141	1.07962	1.34964	1.41635	1.49288	1.29551	0.114528	0.234618	0.228252
		1.31	1.44559	1.08039	1.35006	1.41569	1.49243	1.29686	0.115234	0.236201	0.228634
		1.31333	1.44527	1.07888	1.35045	1.41348	1.49496	1.29603	0.11452	0.23579	0.22762
		1.31667	1.44563	1.08139	1.35008	1.41653	1.49736	1.29634	0.116031	0.236067	0.228636
		1.32	1.44761	1.08147	1.3512	1.41424	1.49749	1.29551	0.116069	0.235633	0.228525
		1.32333	1.44821	1.08291	1.35136	1.4152	1.49866	1.29884	0.117462	0.237023	0.229031
		1.32667	1.44811	1.08562	1.35372	1.41624	1.49992	1.29844	0.116919	0.236368	0.2306
		1.33	1.44872	1.08771	1.35492	1.41819	1.501	1.30015	0.117054	0.237649	0.232459
		1.33333	1.45073	1.08697	1.35587	1.42052	1.50208	1.303	0.116138	0.2389	0.232907
		1.33667	1.45092	1.08882	1.35668	1.42094	1.50279	1.30456	0.116598	0.239274	0.234936
		1.34	1.45243	1.08832	1.35781	1.42004	1.50343	1.30322	0.115002	0.238235	0.233742
		1.34333	1.45384	1.08779	1.35922	1.4209	1.50465	1.3059	0.114923	0.240092	0.234119
		1.34667	1.45389	1.08844	1.36017	1.42182	1.50539	1.30876	0.114905	0.240978	0.232399
		1.35	1.4551	1.09102	1.36162	1.4209	1.50653	1.30665	0.115631	0.24065	0.233952
		1.35333	1.4572	1.09285	1.36284	1.42542	1.50764	1.30585	0.115934	0.241373	0.233014
		1.35667	1.4557	1.09436	1.36388	1.42498	1.50789	1.30841	0.116985	0.242769	0.234202
		1.36	1.45484	1.09419	1.36385	1.42863	1.50864	1.30778	0.11746	0.242423	0.23516
		1.36333	1.45689	1.09674	1.36413	1.42715	1.50938	1.30835	0.117449	0.242434	0.237083
		1.36667	1.45436	1.09765	1.36511	1.42868	1.51055	1.31132	0.119091	0.24177	0.236372
		1.37	1.45343	1.09879	1.36453	1.4256	1.51312	1.31299	0.11681	0.243132	0.23804
		1.37333	1.45389	1.09898	1.36564	1.42891	1.51556	1.3128	0.11796	0.243253	0.237925
		1.37667	1.4545	1.10212	1.36753	1.4315	1.51916	1.31449	0.118116	0.244911	0.235748
		1.38	1.45395	1.10311	1.36947	1.43369	1.51827	1.31582	0.119084	0.246752	0.23606
		1.38333	1.45831	1.1035	1.36999	1.4361	1.52096	1.31458	0.118211	0.248153	0.235696
		1.38667	1.46016	1.10486	1.3716	1.43892	1.52078	1.31537	0.119107	0.24679	0.23564
		1.39	1.46094	1.10835	1.37407	1.4407	1.51972	1.31757	0.119071	0.246349	0.237028
		1.39333	1.4612	1.10759	1.3733	1.44324	1.51835	1.32012	0.118763	0.24583	0.238063
		1.39667	1.46441	1.10855	1.37349	1.44305	1.52145	1.32035	0.119191	0.244907	0.238315
		1.4	1.4645	1.11121	1.37399	1.43828	1.51981	1.32203	0.118918	0.245337	0.238518
		1.40333	1.46476	1.11047	1.37415	1.4431	1.51949	1.3235	0.12079	0.246936	0.238276
		1.40667	1.46715	1.11006	1.37439	1.43997	1.52214	1.32463	0.120689	0.247215	0.238102
		1.41	1.46936	1.11233	1.37683	1.43727	1.52214	1.32435	0.119084	0.247003	0.239524
		1.41333	1.46939	1.11345	1.37718	1.43677	1.52262	1.3241	0.118353	0.247201	0.240073
		1.41667	1.4679	1.11295	1.38009	1.44115	1.52357	1.32414	0.11847	0.247583	0.241108
		1.42	1.46907	1.11495	1.38187	1.43624	1.52635	1.32509	0.117797	0.248954	0.242599
		1.42333	1.47034	1.11575	1.38152	1.43993	1.52753	1.32387	0.118862	0.249839	0.242818
		1.42667	1.46968	1.1162	1.38263	1.4401	1.52865	1.32347	0.121889	0.249617	0.243228
		1.43	1.47133	1.117	1.38461	1.44463	1.52866	1.32281	0.123447	0.251056	0.242315
		1.43333	1.4748	1.11774	1.38438	1.44701	1.52872	1.32598	0.123873	0.252114	0.243557
		1.43667	1.47929	1.11865	1.38493	1.44862	1.52882	1.32537	0.124017	0.252561	0.242256
		1.44	1.47813	1.11997	1.38594	1.44869	1.5295	1.32804	0.12337	0.251891	0.241892
		1.44333	1.48183	1.1211	1.38509	1.44925	1.53057	1.32759	0.124066	0.25294	0.242377
		1.44667	1.48195	1.12044	1.38489	1.44701	1.53128	1.33009	0.124536	0.251508	0.243805
		1.45	1.48225	1.12196	1.38538	1.44969	1.53407	1.32911	0.124973	0.250952	0.244545
		1.45333	1.47837	1.12375	1.38597	1.45058	1.53485	1.33196	0.125211	0.25071	0.245541
		1.45667	1.4792	1.12451	1.38798	1.45233	1.53487	1.3331	0.126397	0.25135	0.247134
		1.46	1.47599	1.12515	1.38976	1.45238	1.53447	1.33547	0.125875	0.250862	0.246584
		1.46333	1.4741	1.12729	1.39135	1.45482	1.5365	1.33476	0.125184	0.252835	0.246265
		1.46667	1.476	1.12888	1.39182	1.45353	1.53595	1.33625	0.1258	0.25285	0.246643
		1.47	1.47913	1.12887	1.39346	1.45263	1.53716	1.33517	0.126688	0.252434	0.247006
		1.47333	1.47967	1.12835	1.39281	1.45391	1.53898	1.33491	0.126801	0.254012	0.246688
		1.47667	1.48456	1.12871	1.39391	1.45373	1.54083	1.33544	0.12507	0.255793	0.248018
		1.48	1.48705	1.12822	1.39261	1.45574	1.54101	1.33641	0.124836	0.257751	0.248429
		1.48333	1.48364	1.12884	1.39322	1.45714	1.54154	1.33631	0.124224	0.258484	0.248365
		1.48667	1.48228	1.12893	1.39396	1.45905	1.54086	1.3362	0.124187	0.260324	0.249064
		1.49	1.4822	1.1315	1.39423	1.45954	1.54068	1.33668	0.123523	0.259089	0.249549
		1.49333	1.48146	1.13164	1.39396	1.46259	1.54258	1.33809	0.125403	0.259437	0.250351
		1.49667	1.4815	1.13445	1.39538	1.46251	1.54369	1.34095	0.12592	0.258396	0.251283
		1.5	1.48337	1.13475	1.39602	1.46141	1.54536	1.34147	0.127156	0.258899	0.250854
		1.50333	1.4852	1.13597	1.39562	1.46327	1.54554	1.34191	0.127157	0.256974	0.250819
		1.50667	1.48644	1.13646	1.39665	1.46489	1.54678	1.34352	0.126831	0.259499	0.249103
		1.51	1.48816	1.13791	1.39812	1.4662	1.54676	1.34312	0.125736	0.259509	0.248175
		1.51333	1.48934	1.13847	1.39988	1.46544	1.54873	1.34346	0.125357	0.259044	0.249212
		1.51667	1.49175	1.13845	1.40063	1.46901	1.55035	1.3458	0.126508	0.258558	0.25014
		1.52	1.49379	1.13965	1.40206	1.4683	1.55258	1.34833	0.126809	0.260486	0.250923
		1.52333	1.49607	1.14132	1.40483	1.46919	1.55243	1.34949	0.128008	0.259894	0.253941
		1.52667	1.49611	1.14258	1.40449	1.46828	1.55371	1.35235	0.128945	0.260927	0.254218
		1.53	1.49724	1.14289	1.40508	1.46884	1.55342	1.35219	0.130492	0.261201	0.253543
		1.53333	1.4968	1.14425	1.40519	1.46606	1.55181	1.3534	0.128145	0.26341	0.252925
		1.53667	1.49341	1.14499	1.40609	1.47114	1.55381	1.35375	0.129164	0.262678	0.253603
		1.54	1.49163	1.14398	1.40518	1.47007	1.55626	1.35325	0.128072	0.26282	0.253614
		1.54333	1.49128	1.14512	1.40766	1.47024	1.55628	1.35064	0.128633	0.262885	0.254166
		1.54667	1.49083	1.1466	1.40716	1.47165	1.55686	1.35023	0.12864	0.26329	0.255872
		1.55	1.49438	1.14735	1.40939	1.47559	1.55924	1.35108	0.129135	0.262777	0.257606
		1.55333	1.49876	1.14809	1.4108	1.47098	1.55959	1.35179	0.128285	0.264247	0.256571
		1.55667	1.49922	1.14894	1.41244	1.47108	1.5608	1.35312	0.1311	0.264961	0.256643
		1.56	1.50212	1.14875	1.41228	1.47218	1.56288	1.35644	0.130657	0.265708	0.256807
		1.56333	1.50277	1.14846	1.41521	1.47395	1.56237	1.35773	0.129706	0.267065	0.256055
		1.56667	1.5029	1.1488	1.4157	1.47418	1.5619	1.35749	0.130826	0.267482	0.255107
		1.57	1.5031	1.14749	1.41613	1.47506	1.5645	1.36021	0.12895	0.267598	0.256098
		1.57333	1.50489	1.14884	1.41676	1.47468	1.56076	1.35901	0.126729	0.268335	0.257199
		1.57667	1.50424	1.15024	1.41691	1.47436	1.55889	1.36096	0.126601	0.268412	0.257703
		1.58	1.5054	1.15136	1.4166	1.47438	1.55979	1.36171	0.128006	0.266159	0.258053
		1.58333	1.50623	1.15391	1.41793	1.47718	1.56141	1.3615	0.127345	0.266948	0.260055
		1.58667	1.50631	1.15557	1.41843	1.47886	1.55893	1.35906	0.129042	0.266322	0.259932
		1.59	1.50737	1.15834	1.41816	1.48225	1.56166	1.35916	0.130728	0.266287	0.259984
		1.59333	1.50927	1.15799	1.41958	1.48361	1.56341	1.35583	0.131702	0.265078	0.25955
		1.59667	1.50945	1.15867	1.42164	1.48525	1.56598	1.35643	0.131231	0.26762	0.259318
		1.6	1.50908	1.15749	1.42297	1.48223	1.56666	1.35713	0.131184	0.267335	0.259359
		1.60333	1.50828	1.15802	1.42376	1.48254	1.56693	1.35715	0.130968	0.26877	0.259355
		1.60667	1.50849	1.15626	1.42496	1.48009	1.56725	1.35757	0.129679	0.269537	0.259253
		1.61	1.50646	1.15796	1.42519	1.48183	1.56777	1.35966	0.129113	0.270955	0.260718
		1.61333	1.50644	1.15884	1.42416	1.48077	1.56691	1.35991	0.128764	0.270861	0.262179
		1.61667	1.50749	1.16104	1.42248	1.48082	1.56721	1.36133	0.128914	0.272799	0.260875
		1.62	1.5082	1.16414	1.42452	1.48105	1.56691	1.363	0.129769	0.272102	0.261028
		1.62333	1.51003	1.16691	1.42617	1.486	1.56921	1.36637	0.131638	0.271339	0.262423
		1.62667	1.51307	1.16767	1.42654	1.48818	1.56879	1.36577	0.13223	0.272515	0.262462
		1.63	1.51259	1.16752	1.42752	1.49219	1.57005	1.36764	0.131777	0.272785	0.262452
		1.63333	1.51262	1.16819	1.42997	1.49412	1.57031	1.36706	0.132987	0.271854	0.263354
		1.63667	1.51253	1.16734	1.42803	1.4948	1.57256	1.36898	0.132414	0.272305	0.264918
		1.64	1.50942	1.16807	1.42697	1.48809	1.57329	1.36758	0.13154	0.273401	0.264444
		1.64333	1.50957	1.1686	1.42862	1.48654	1.57455	1.36987	0.130578	0.272215	0.264714
		1.64667	1.5101	1.17022	1.42969	1.48332	1.57455	1.36982	0.132001	0.273503	0.265024
		1.65	1.50947	1.16951	1.43051	1.48333	1.57527	1.36874	0.130356	0.275054	0.266064
		1.65333	1.51316	1.16989	1.43159	1.48552	1.57673	1.3672	0.131526	0.275758	0.267153
		1.65667	1.51788	1.16884	1.43346	1.4921	1.57599	1.36963	0.1312	0.275676	0.266267
		1.66	1.51701	1.17054	1.43233	1.49579	1.57663	1.37045	0.132926	0.276859	0.265948
		1.66333	1.51901	1.17197	1.43165	1.4957	1.57673	1.37018	0.132332	0.275497	0.264481
		1.66667	1.5197	1.17222	1.42975	1.49862	1.57635	1.37263	0.133247	0.272675	0.26304
		1.67	1.51669	1.17333	1.43075	1.499	1.57566	1.37462	0.131917	0.272617	0.260385
		1.67333	1.51381	1.17499	1.43177	1.49841	1.57733	1.37399	0.131742	0.272739	0.261793
		1.67667	1.51467	1.17459	1.43417	1.49485	1.57705	1.37137	0.130676	0.273934	0.262188
		1.68	1.51446	1.17465	1.43522	1.49942	1.57735	1.37275	0.132624	0.274891	0.262769
		1.68333	1.51552	1.17655	1.43606	1.49673	1.57933	1.37272	0.133515	0.277291	0.263535
		1.68667	1.51593	1.17777	1.43514	1.49434	1.58065	1.37256	0.13441	0.278377	0.265364
		1.69	1.5178	1.17674	1.43582	1.4953	1.58097	1.37206	0.135196	0.278572	0.26528
		1.69333	1.51786	1.17782	1.43484	1.49551	1.58227	1.37573	0.137022	0.278094	0.266639
		1.69667	1.51924	1.17769	1.43612	1.49304	1.58299	1.37544	0.135192	0.278933	0.267629
		1.7	1.51928	1.17921	1.43711	1.49551	1.58364	1.37554	0.134487	0.278724	0.268377
		1.70333	1.52148	1.1801	1.43913	1.49522	1.58325	1.37706	0.13376	0.277875	0.268937
		1.70667	1.52196	1.18209	1.43993	1.49778	1.58367	1.3793	0.134413	0.27853	0.266925
		1.71	1.52328	1.18344	1.43992	1.50209	1.58286	1.37862	0.133216	0.279835	0.267472
		1.71333	1.52404	1.18447	1.43899	1.50579	1.58409	1.38024	0.133955	0.27842	0.268517
		1.71667	1.52471	1.18366	1.43895	1.50429	1.58419	1.38279	0.133754	0.277813	0.268479
		1.72	1.52526	1.18407	1.43961	1.50678	1.58518	1.38177	0.135506	0.279333	0.268551
		1.72333	1.52436	1.18476	1.43876	1.50264	1.58518	1.38022	0.135003	0.279262	0.27161
		1.72667	1.52543	1.18371	1.4415	1.50301	1.58731	1.38144	0.134663	0.2788	0.270651
		1.73	1.5251	1.18403	1.44292	1.50062	1.58855	1.38018	0.134517	0.281386	0.270951
		1.73333	1.52405	1.18654	1.44419	1.50112	1.58876	1.38038	0.134779	0.282218	0.270634
		1.73667	1.52157	1.186	1.4442	1.50181	1.58943	1.38147	0.133443	0.28204	0.272209
		1.74	1.52242	1.18621	1.446	1.50409	1.5906	1.3822	0.132801	0.283332	0.271394
		1.74333	1.52157	1.18799	1.44575	1.5032	1.59132	1.38197	0.134599	0.283201	0.271409
		1.74667	1.52228	1.18687	1.44545	1.50073	1.59107	1.38473	0.135602	0.284182	0.270816
		1.75	1.52287	1.1858	1.44537	1.50263	1.59188	1.38448	0.136084	0.283426	0.272425
		1.75333	1.52514	1.18841	1.44624	1.50349	1.59062	1.38495	0.136977	0.283125	0.271047
		1.75667	1.52466	1.18854	1.4472	1.50548	1.59339	1.38759	0.138531	0.282529	0.272084
		1.76	1.52274	1.18974	1.44753	1.50496	1.5936	1.38813	0.136225	0.28375	0.273527
		1.76333	1.52164	1.19203	1.44892	1.50884	1.59393	1.3867	0.136527	0.283289	0.275641
		1.76667	1.52217	1.19245	1.45033	1.50698	1.59363	1.38603	0.136523	0.283935	0.274528
		1.77	1.52041	1.19344	1.45094	1.5124	1.5945	1.38613	0.137126	0.284274	0.276742
		1.77333	1.52142	1.19377	1.45041	1.51458	1.5942	1.3878	0.136514	0.284396	0.276397
		1.77667	1.52242	1.19317	1.45083	1.51469	1.59473	1.38963	0.138145	0.284192	0.277461
		1.78	1.52372	1.1936	1.45173	1.51412	1.59528	1.39155	0.137732	0.283875	0.277128
		1.78333	1.52305	1.19346	1.45231	1.51509	1.59599	1.39423	0.13852	0.285057	0.277521
		1.78667	1.52507	1.19121	1.45299	1.51108	1.59605	1.39585	0.138228	0.285994	0.276519
		1.79	1.52326	1.19188	1.45404	1.51187	1.59704	1.3965	0.138963	0.286733	0.278253
		1.79333	1.52364	1.19304	1.45417	1.51339	1.59607	1.39535	0.139949	0.285909	0.277994
		1.79667	1.52178	1.19345	1.45524	1.51906	1.59707	1.3939	0.139962	0.285834	0.277331
		1.8	1.52252	1.19476	1.45491	1.5224	1.59908	1.3924	0.139682	0.285002	0.279236
		1.80333	1.52241	1.19684	1.45483	1.52065	1.60068	1.39228	0.139718	0.28553	0.279253
		1.80667	1.52324	1.19764	1.45613	1.51674	1.6003	1.39153	0.13951	0.287223	0.278427
		1.81	1.52565	1.19772	1.4573	1.51866	1.60073	1.3931	0.137867	0.287977	0.276609
		1.81333	1.52769	1.19851	1.45743	1.51349	1.60078	1.39609	0.138271	0.289067	0.278364
		1.81667	1.52848	1.19978	1.45944	1.51215	1.6006	1.39822	0.139203	0.291843	0.27727
		1.82	1.52804	1.19764	1.45994	1.51476	1.60207	1.3999	0.139756	0.291092	0.278034
		1.82333	1.52823	1.19849	1.45872	1.51599	1.60269	1.399	0.141353	0.289629	0.276875
		1.82667	1.52705	1.19827	1.45928	1.51378	1.60437	1.39851	0.141818	0.28995	0.28018
		1.83	1.52651	1.19881	1.4595	1.51408	1.60496	1.39874	0.141472	0.289436	0.279115
		1.83333	1.52691	1.19822	1.4592	1.51519	1.60448	1.39901	0.140985	0.287896	0.279341
		1.83667	1.52806	1.20196	1.45966	1.51428	1.60434	1.39586	0.141044	0.288316	0.280349
		1.84	1.52997	1.20242	1.4609	1.51604	1.60392	1.39686	0.138767	0.289643	0.280678
		1.84333	1.5315	1.20397	1.46091	1.51935	1.60464	1.39671	0.139099	0.289543	0.280573
		1.84667	1.53273	1.20391	1.46091	1.5198	1.6064	1.39588	0.137661	0.288704	0.280146
		1.85	1.53486	1.20612	1.46178	1.52077	1.60753	1.39559	0.137656	0.289961	0.279817
		1.85333	1.536	1.20521	1.46213	1.52063	1.60891	1.39797	0.139202	0.290762	0.279799
		1.85667	1.53706	1.20717	1.4641	1.5198	1.6105	1.39853	0.140069	0.289708	0.28151
		1.86	1.53963	1.20751	1.46479	1.51888	1.61219	1.40094	0.141324	0.290464	0.27888
		1.86333	1.54053	1.20932	1.46505	1.52053	1.61251	1.4021	0.144833	0.292627	0.280309
		1.86667	1.53967	1.2078	1.46332	1.51792	1.61222	1.40087	0.145083	0.292056	0.28056
		1.87	1.54053	1.20947	1.46481	1.52101	1.61116	1.40085	0.141418	0.292223	0.279501
		1.87333	1.54021	1.20814	1.46461	1.52333	1.6104	1.40261	0.141975	0.292981	0.279385
		1.87667	1.53734	1.20753	1.46499	1.52617	1.60999	1.40255	0.139652	0.294378	0.281486
		1.88	1.53792	1.20718	1.46521	1.52668	1.60981	1.40258	0.136636	0.294797	0.280645
		1.88333	1.5391	1.2093	1.46777	1.52635	1.60954	1.40438	0.136519	0.294787	0.281609
		1.88667	1.53828	1.20783	1.46763	1.52514	1.61016	1.4047	0.138113	0.295549	0.280907
		1.89	1.5399	1.20859	1.46664	1.52561	1.61235	1.40367	0.137294	0.295579	0.281461
		1.89333	1.54233	1.20926	1.46581	1.52162	1.61312	1.40498	0.138039	0.295915	0.281615
		1.89667	1.54226	1.2107	1.46754	1.52	1.61303	1.40492	0.139066	0.295916	0.281694
		1.9	1.54276	1.2106	1.46718	1.5259	1.61535	1.40641	0.139423	0.295988	0.280836
		1.90333	1.54402	1.2132	1.46713	1.52669	1.61699	1.40733	0.139565	0.296192	0.28122
		1.90667	1.54325	1.214	1.46857	1.52729	1.61586	1.40917	0.140763	0.297305	0.280011
		1.91	1.54319	1.21507	1.47033	1.52984	1.61588	1.40768	0.139867	0.297125	0.279357
		1.91333	1.54489	1.2155	1.46963	1.52835	1.61671	1.40966	0.139869	0.297371	0.27932
		1.91667	1.54481	1.21592	1.47053	1.52277	1.61732	1.40965	0.139577	0.299132	0.280311
		1.92	1.54639	1.21616	1.47171	1.52516	1.61731	1.41206	0.138788	0.2989	0.281565
		1.92333	1.54904	1.21637	1.472	1.52602	1.61967	1.41141	0.139357	0.298154	0.282376
		1.92667	1.54999	1.21625	1.47288	1.52646	1.61982	1.41384	0.142733	0.295993	0.282968
		1.93	1.54951	1.21536	1.47422	1.53229	1.61949	1.41511	0.143633	0.296452	0.283362
		1.93333	1.55101	1.21654	1.47396	1.53741	1.61981	1.41672	0.145119	0.294535	0.283214
		1.93667	1.54997	1.21656	1.47432	1.53649	1.61996	1.41667	0.146323	0.294762	0.282692
		1.94	1.54829	1.21747	1.47564	1.53346	1.61993	1.41824	0.145932	0.294997	0.283172
		1.94333	1.5472	1.21822	1.47762	1.53573	1.61986	1.41753	0.143736	0.296677	0.28248
		1.94667	1.54785	1.21873	1.47588	1.53441	1.62138	1.41806	0.143695	0.295758	0.283044
		1.95	1.54981	1.21833	1.47754	1.53518	1.62126	1.4186	0.142367	0.29704	0.284125
		1.95333	1.55265	1.21898	1.47656	1.53615	1.62266	1.41836	0.144058	0.29765	0.284746
		1.95667	1.55447	1.21981	1.47693	1.53783	1.62302	1.41761	0.143818	0.298804	0.282987
		1.96	1.55594	1.22079	1.47536	1.53583	1.62385	1.41908	0.143475	0.300412	0.28389
		1.96333	1.55686	1.22239	1.47783	1.53645	1.6242	1.41844	0.145461	0.301493	0.284454
		1.96667	1.5569	1.2217	1.47637	1.53339	1.62616	1.41786	0.145765	0.30126	0.284211
		1.97	1.55587	1.22223	1.47908	1.53426	1.62604	1.41853	0.143949	0.301979	0.283219
		1.97333	1.55841	1.22165	1.48031	1.53715	1.62572	1.41766	0.143189	0.301733	0.28539
		1.97667	1.55981	1.22257	1.48242	1.537	1.62664	1.41854	0.14554	0.30029	0.285629
		1.98	1.56358	1.22167	1.48288	1.54083	1.62739	1.41764	0.143776	0.299899	0.286355
		1.98333	1.5648	1.22279	1.48466	1.54543	1.62703	1.41923	0.144394	0.301262	0.286627
		1.98667	1.56727	1.22174	1.48339	1.54652	1.62916	1.42016	0.146101	0.301041	0.288195
		1.99	1.56777	1.22268	1.48395	1.54075	1.62859	1.42305	0.148129	0.301897	0.287997
		1.99333	1.5685	1.2227	1.48283	1.54207	1.63033	1.42309	0.147076	0.303029	0.287549
		1.99667	1.56644	1.22422	1.48231	1.53776	1.63008	1.42486	0.147522	0.304433	0.28724
		2	1.56715	1.22488	1.48281	1.5354	1.63096	1.42514	0.146627	0.304198	0.287502
		2.00333	1.56606	1.22651	1.48512	1.53417	1.62884	1.42522	0.144935	0.302761	0.287065
		2.00667	1.56544	1.22657	1.48426	1.5371	1.63315	1.42697	0.143846	0.302734	0.287243
		2.01	1.56398	1.22795	1.48485	1.5373	1.63115	1.4277	0.144168	0.302851	0.28834
		2.01333	1.56382	1.22859	1.48476	1.54108	1.63149	1.42697	0.142498	0.301399	0.287194
		2.01667	1.56343	1.2294	1.48445	1.54201	1.62989	1.42724	0.144391	0.301353	0.287797
		2.02	1.56587	1.2295	1.48365	1.54003	1.63122	1.42637	0.145185	0.302324	0.289109
		2.02333	1.5673	1.23108	1.48455	1.54268	1.62921	1.42343	0.145491	0.301819	0.289139
		2.02667	1.57019	1.22995	1.48446	1.54356	1.6303	1.42304	0.144555	0.301798	0.289784
		2.03	1.5704	1.23047	1.48558	1.54248	1.62941	1.4251	0.146551	0.30282	0.28941
		2.03333	1.57191	1.23071	1.48703	1.544	1.63081	1.42442	0.144552	0.302907	0.289391
		2.03667	1.57296	1.23151	1.4883	1.5457	1.6317	1.42447	0.143982	0.303829	0.288269
		2.04	1.57181	1.2304	1.48745	1.54436	1.63254	1.42612	0.144163	0.304329	0.288489
		2.04333	1.57128	1.23204	1.48893	1.54475	1.6326	1.42479	0.144659	0.304223	0.287527
		2.04667	1.57263	1.23173	1.48936	1.54546	1.63244	1.42483	0.144385	0.304208	0.288925
		2.05	1.57104	1.23283	1.48882	1.54889	1.63241	1.42445	0.143952	0.303152	0.288376
		2.05333	1.5689	1.23349	1.48844	1.55137	1.63134	1.42651	0.144541	0.302899	0.289989
		2.05667	1.56936	1.23495	1.48998	1.5554	1.63126	1.42646	0.143425	0.302427	0.28942
		2.06	1.56839	1.23483	1.48955	1.55436	1.63209	1.42635	0.145566	0.302011	0.288545
		2.06333	1.56664	1.23385	1.49042	1.55433	1.6331	1.42463	0.144945	0.302662	0.288912
		2.06667	1.56893	1.23217	1.49054	1.55145	1.63386	1.42514	0.14678	0.305046	0.289443
		2.07	1.56986	1.23247	1.49058	1.55336	1.63377	1.42512	0.147553	0.304548	0.288277
		2.07333	1.57221	1.23252	1.49034	1.55207	1.63397	1.4249	0.149086	0.305596	0.287898
		2.07667	1.57427	1.23304	1.49041	1.55071	1.633	1.42664	0.148091	0.306279	0.289801
		2.08	1.57658	1.23384	1.49036	1.54788	1.63453	1.42792	0.147674	0.305351	0.290053
		2.08333	1.5765	1.23664	1.49134	1.54632	1.63409	1.42826	0.146797	0.305042	0.290867
		2.08667	1.57798	1.23712	1.49171	1.54056	1.63513	1.42856	0.145788	0.306154	0.291449
		2.09	1.57713	1.23772	1.49301	1.53922	1.63526	1.42848	0.146679	0.307176	0.294429
		2.09333	1.57735	1.23779	1.49284	1.5452	1.63668	1.43007	0.146047	0.306734	0.294584
		2.09667	1.57913	1.23936	1.49387	1.54734	1.63739	1.43003	0.147137	0.308481	0.293478
		2.1	1.57674	1.23991	1.49378	1.54653	1.63876	1.43011	0.147682	0.307846	0.292947
		2.10333	1.57537	1.23878	1.49483	1.54988	1.63871	1.4301	0.149004	0.308551	0.29356
		2.10667	1.57641	1.2394	1.49443	1.55327	1.6386	1.43267	0.148436	0.307759	0.292681
		2.11	1.5747	1.24076	1.49626	1.55002	1.63983	1.4331	0.147385	0.308623	0.292673
		2.11333	1.57264	1.24136	1.49504	1.5488	1.6384	1.43355	0.146001	0.308018	0.293199
		2.11667	1.57607	1.24155	1.49617	1.55229	1.63839	1.43287	0.145737	0.308559	0.293739
		2.12	1.57827	1.24392	1.49635	1.55348	1.63966	1.43418	0.144752	0.308298	0.292636
		2.12333	1.57749	1.24406	1.4971	1.55208	1.64168	1.43445	0.143788	0.308624	0.291758
		2.12667	1.58157	1.243	1.49695	1.5518	1.64117	1.43541	0.145713	0.308282	0.292936
		2.13	1.58421	1.2442	1.49855	1.55331	1.64252	1.43727	0.146678	0.308287	0.29344
		2.13333	1.58099	1.24333	1.49834	1.55125	1.64227	1.43903	0.14591	0.308431	0.293344
		2.13667	1.57816	1.24339	1.49765	1.55071	1.64318	1.4385	0.146871	0.308717	0.295494
		2.14	1.57942	1.24357	1.49689	1.5531	1.64198	1.4363	0.147578	0.309298	0.295964
		2.14333	1.57518	1.24456	1.49666	1.55583	1.64282	1.43508	0.145634	0.311025	0.295674
		2.14667	1.57385	1.24339	1.49639	1.55908	1.64462	1.43265	0.144802	0.311289	0.29631
		2.15	1.57607	1.2427	1.49732	1.56412	1.64412	1.43196	0.147308	0.311485	0.294616
		2.15333	1.57773	1.24185	1.49817	1.5647	1.64412	1.43334	0.147231	0.311355	0.293896
		2.15667	1.57582	1.24351	1.49894	1.56218	1.64426	1.43455	0.147014	0.311976	0.295802
		2.16	1.57797	1.24303	1.49874	1.55839	1.64518	1.43546	0.147448	0.311828	0.295541
		2.16333	1.57843	1.24363	1.49865	1.55426	1.64338	1.43763	0.148565	0.311092	0.294794
		2.16667	1.57842	1.24602	1.4991	1.55507	1.64462	1.43887	0.146516	0.311287	0.296831
		2.17	1.57754	1.24706	1.49951	1.55528	1.6452	1.4374	0.145893	0.311443	0.296591
		2.17333	1.57684	1.24585	1.5015	1.55589	1.64604	1.43817	0.14472	0.310634	0.295483
		2.17667	1.57714	1.24685	1.50317	1.56251	1.64507	1.43849	0.145623	0.310986	0.295724
		2.18	1.57814	1.24682	1.50523	1.56486	1.64614	1.43939	0.145546	0.311457	0.296236
		2.18333	1.57805	1.24733	1.50589	1.56443	1.64523	1.43862	0.145885	0.311162	0.295397
		2.18667	1.58017	1.24747	1.50663	1.56608	1.6448	1.44015	0.146871	0.311209	0.294952
		2.19	1.584	1.24811	1.5055	1.56722	1.64538	1.44027	0.148188	0.310302	0.295118
		2.19333	1.58514	1.24935	1.5064	1.56463	1.64599	1.4404	0.147432	0.309737	0.295537
		2.19667	1.58376	1.25144	1.5068	1.56221	1.64724	1.43967	0.148988	0.311135	0.295571
		2.2	1.58536	1.25037	1.50631	1.55821	1.65032	1.44135	0.149358	0.310182	0.295773
		2.20333	1.58346	1.252	1.50616	1.55524	1.65123	1.44121	0.148259	0.310671	0.295083
		2.20667	1.58184	1.25405	1.50725	1.55276	1.65242	1.44051	0.148229	0.312565	0.293919
		2.21	1.58109	1.25478	1.50804	1.55608	1.65251	1.43877	0.149223	0.312937	0.29361
		2.21333	1.58027	1.25436	1.50813	1.55897	1.65169	1.43987	0.14828	0.312983	0.294681
		2.21667	1.57984	1.25432	1.50986	1.55962	1.65154	1.43806	0.148866	0.314377	0.294571
		2.22	1.58231	1.25244	1.51137	1.56097	1.65139	1.43745	0.149295	0.313608	0.294466
		2.22333	1.58361	1.25193	1.51109	1.56164	1.65055	1.43879	0.149744	0.312382	0.296948
		2.22667	1.58423	1.25199	1.51131	1.55928	1.65089	1.44153	0.150538	0.312169	0.296281
		2.23	1.58668	1.25122	1.51125	1.5611	1.65224	1.44132	0.150167	0.311837	0.296329
		2.23333	1.58732	1.25331	1.512	1.5622	1.65203	1.44324	0.149328	0.311544	0.296697
		2.23667	1.58396	1.25426	1.51261	1.5648	1.65228	1.44394	0.147967	0.313665	0.29766
		2.24	1.58221	1.25412	1.51298	1.56775	1.65279	1.44529	0.148176	0.313946	0.296633
		2.24333	1.5816	1.25426	1.51337	1.56399	1.65376	1.44577	0.148351	0.31446	0.29686
		2.24667	1.57987	1.25506	1.51271	1.56252	1.65347	1.44685	0.149605	0.314086	0.296329
		2.25	1.58029	1.25641	1.51085	1.56432	1.65188	1.44812	0.150187	0.314756	0.295591
		2.25333	1.58436	1.25697	1.51073	1.56138	1.6514	1.44724	0.151273	0.31301	0.295729
		2.25667	1.58598	1.25794	1.51051	1.56139	1.65191	1.44543	0.150815	0.313155	0.296975
		2.26	1.58735	1.25755	1.51079	1.56895	1.65317	1.44535	0.150011	0.313546	0.29847
		2.26333	1.59062	1.25774	1.51267	1.56926	1.65215	1.44552	0.148808	0.314574	0.298616
		2.26667	1.59075	1.25738	1.51498	1.5681	1.65612	1.44557	0.14785	0.314057	0.30106
		2.27	1.58697	1.25685	1.51464	1.56915	1.65548	1.44864	0.148187	0.313972	0.30219
		2.27333	1.58695	1.25643	1.5159	1.56923	1.65902	1.45083	0.149352	0.315139	0.301627
		2.27667	1.58388	1.25637	1.51601	1.56456	1.65707	1.45068	0.149424	0.31505	0.300686
		2.28	1.5826	1.25671	1.51643	1.57	1.65714	1.45138	0.152149	0.31579	0.299964
		2.28333	1.58105	1.25699	1.51532	1.5662	1.65618	1.4524	0.152306	0.316831	0.29881
		2.28667	1.58458	1.25934	1.51537	1.56974	1.65811	1.45192	0.154019	0.318885	0.298849
		2.29	1.58496	1.2601	1.5148	1.57192	1.65494	1.45165	0.154404	0.318923	0.299405
		2.29333	1.58713	1.2621	1.51472	1.57429	1.65509	1.45141	0.1544	0.319291	0.299254
		2.29667	1.588	1.2644	1.51387	1.56955	1.65613	1.44978	0.152473	0.317804	0.299892
		2.3	1.58984	1.26351	1.51371	1.57348	1.65614	1.44956	0.153579	0.316486	0.300846
		2.30333	1.58995	1.26404	1.51439	1.57191	1.65617	1.44977	0.151951	0.316897	0.300506
		2.30667	1.59223	1.26336	1.51612	1.5688	1.65573	1.44972	0.150561	0.316461	0.299026
		2.31	1.59182	1.26411	1.51711	1.56763	1.65704	1.45131	0.149913	0.316101	0.298602
		2.31333	1.59192	1.26473	1.51713	1.56813	1.65717	1.45367	0.15045	0.318112	0.298455
		2.31667	1.59208	1.26647	1.51896	1.57017	1.65694	1.45354	0.149674	0.318486	0.298317
		2.32	1.59004	1.26549	1.51937	1.56986	1.65693	1.4538	0.150732	0.317545	0.29935
		2.32333	1.5891	1.26657	1.51975	1.56988	1.65683	1.45439	0.15078	0.317477	0.299131
		2.32667	1.591	1.26674	1.51993	1.56964	1.65635	1.45606	0.152193	0.317411	0.300107
		2.33	1.59133	1.26504	1.52162	1.56896	1.6582	1.45701	0.153439	0.31734	0.300584
		2.33333	1.59244	1.26498	1.52134	1.56743	1.65842	1.45771	0.153349	0.317457	0.300879
		2.33667	1.59596	1.26495	1.52179	1.56732	1.65895	1.45929	0.153775	0.318335	0.301557
		2.34	1.59811	1.26584	1.52109	1.56847	1.66059	1.46022	0.155333	0.319401	0.301824
		2.34333	1.59815	1.26456	1.52231	1.57121	1.66224	1.45784	0.154704	0.318919	0.302501
		2.34667	1.59858	1.26527	1.52185	1.57381	1.66241	1.45575	0.154427	0.317571	0.301643
		2.35	1.59921	1.26493	1.52161	1.5766	1.66125	1.45626	0.155539	0.318288	0.301498
		2.35333	1.60012	1.26531	1.52291	1.57616	1.66276	1.45269	0.154029	0.316788	0.30005
		2.35667	1.59964	1.26542	1.52368	1.57615	1.66051	1.45228	0.15255	0.31546	0.30029
		2.36	1.59996	1.26505	1.52238	1.57552	1.66098	1.45342	0.153364	0.317023	0.298541
		2.36333	1.60039	1.26652	1.52257	1.57727	1.66083	1.45339	0.151937	0.318185	0.300574
		2.36667	1.60027	1.26659	1.52332	1.57518	1.66162	1.45257	0.151405	0.319034	0.300798
		2.37	1.59815	1.26679	1.52212	1.57758	1.66001	1.45462	0.151533	0.319543	0.300536
		2.37333	1.59695	1.26662	1.52166	1.57896	1.66281	1.45544	0.152157	0.322	0.301251
		2.37667	1.59821	1.26781	1.52086	1.57826	1.66271	1.45599	0.151062	0.322193	0.303083
		2.38	1.59779	1.26685	1.52131	1.57644	1.66237	1.45622	0.151505	0.321719	0.300292
		2.38333	1.59659	1.26718	1.52046	1.57702	1.66442	1.45435	0.150451	0.322194	0.298683
		2.38667	1.59792	1.26766	1.52157	1.57628	1.66625	1.45558	0.151801	0.322291	0.299718
		2.39	1.59925	1.26876	1.52255	1.57749	1.66641	1.45507	0.15173	0.320462	0.300131
		2.39333	1.60012	1.26923	1.52385	1.57768	1.66769	1.45433	0.153781	0.318588	0.29842
		2.39667	1.60036	1.26993	1.52503	1.5738	1.66691	1.45663	0.154779	0.318754	0.30226
		2.4	1.60245	1.2707	1.5247	1.57709	1.66627	1.45947	0.156229	0.318541	0.304649
		2.40333	1.60307	1.27028	1.524	1.57927	1.6647	1.45995	0.155025	0.319572	0.303521
		2.40667	1.60375	1.27066	1.52374	1.57635	1.66455	1.46087	0.155814	0.319807	0.302797
		2.41	1.60449	1.27059	1.52358	1.57814	1.66447	1.46144	0.153873	0.320261	0.304946
		2.41333	1.60597	1.27028	1.52146	1.58103	1.66554	1.45818	0.153116	0.320347	0.302312
		2.41667	1.60399	1.27001	1.52418	1.5777	1.66646	1.4579	0.153139	0.320797	0.302231
		2.42	1.60428	1.27132	1.52479	1.57585	1.66817	1.45827	0.153768	0.319309	0.302291
		2.42333	1.60266	1.26973	1.5253	1.57786	1.66881	1.45828	0.153702	0.321245	0.30227
		2.42667	1.6017	1.2709	1.52712	1.57809	1.66703	1.45779	0.154095	0.321923	0.302445
		2.43	1.60069	1.27181	1.52822	1.57999	1.66795	1.46087	0.154218	0.322329	0.302937
		2.43333	1.60372	1.27306	1.52786	1.58171	1.668	1.46064	0.154556	0.32134	0.302442
		2.43667	1.60248	1.27187	1.52706	1.58109	1.66841	1.45985	0.155735	0.321907	0.302082
		2.44	1.60574	1.27316	1.52705	1.58124	1.66814	1.45986	0.156304	0.320413	0.30205
		2.44333	1.60641	1.27231	1.52706	1.58161	1.66967	1.4603	0.15607	0.320977	0.300574
		2.44667	1.60769	1.27245	1.52637	1.58086	1.66906	1.45955	0.157898	0.319932	0.300651
		2.45	1.60715	1.27078	1.52621	1.58031	1.66884	1.46055	0.158029	0.321585	0.300608
		2.45333	1.60898	1.274	1.52714	1.5826	1.66762	1.46014	0.156545	0.322314	0.301105
		2.45667	1.60807	1.2738	1.52695	1.58412	1.6686	1.45995	0.155841	0.322647	0.301201
		2.46	1.609	1.27456	1.52604	1.58267	1.66923	1.46207	0.156122	0.322549	0.301392
		2.46333	1.60881	1.27517	1.52748	1.58637	1.67011	1.46447	0.154553	0.324057	0.300864
		2.46667	1.60829	1.277	1.52743	1.58472	1.67008	1.46599	0.15374	0.323263	0.303811
		2.47	1.60919	1.27559	1.52772	1.58545	1.6741	1.46778	0.154778	0.323095	0.305274
		2.47333	1.60688	1.27737	1.52774	1.585	1.67199	1.46953	0.154904	0.323514	0.30506
		2.47667	1.60564	1.27815	1.5279	1.58717	1.67151	1.46769	0.155274	0.323443	0.305675
		2.48	1.60495	1.27674	1.52822	1.58239	1.67154	1.46734	0.155515	0.322827	0.307777
		2.48333	1.60599	1.27766	1.52897	1.58497	1.67184	1.4665	0.156374	0.322891	0.305441
		2.48667	1.60545	1.27875	1.52971	1.5844	1.66918	1.46618	0.154496	0.323891	0.304635
		2.49	1.60752	1.27847	1.53011	1.58479	1.67141	1.46634	0.154484	0.323179	0.305527
		2.49333	1.60959	1.27977	1.53045	1.58392	1.67249	1.46728	0.156076	0.32277	0.306877
		2.49667	1.6113	1.28125	1.53097	1.58676	1.67342	1.46512	0.154529	0.324041	0.304321
		2.5	1.612	1.28085	1.53037	1.58727	1.67301	1.46525	0.154465	0.322647	0.304411
		2.50333	1.61191	1.28079	1.53012	1.58707	1.67473	1.46467	0.157082	0.321851	0.304021
		2.50667	1.61203	1.27963	1.5311	1.58771	1.67571	1.46321	0.156908	0.325097	0.30595
		2.51	1.61266	1.27893	1.53119	1.5868	1.67501	1.46345	0.156088	0.325462	0.30486
		2.51333	1.61402	1.27848	1.5323	1.58876	1.67473	1.46531	0.157767	0.324539	0.305297
		2.51667	1.61292	1.27839	1.53365	1.58699	1.67601	1.46603	0.157583	0.326526	0.305772
		2.52	1.61237	1.27807	1.53324	1.58487	1.67451	1.46664	0.156005	0.326863	0.306456
		2.52333	1.612	1.28021	1.5338	1.58807	1.67412	1.46866	0.156649	0.324515	0.304229
		2.52667	1.61059	1.28082	1.53348	1.59076	1.67452	1.47057	0.156012	0.326613	0.303894
		2.53	1.6085	1.28257	1.53254	1.5896	1.67513	1.47069	0.155728	0.326042	0.304358
		2.53333	1.60996	1.28554	1.53155	1.59218	1.67546	1.47026	0.156203	0.325927	0.304559
		2.53667	1.61174	1.28705	1.53144	1.59432	1.67672	1.47071	0.156388	0.325121	0.305895
		2.54	1.61191	1.28574	1.52993	1.5917	1.67805	1.46937	0.154914	0.325615	0.306118
		2.54333	1.61263	1.28556	1.53182	1.5898	1.67837	1.4701	0.154607	0.324589	0.307404
		2.54667	1.61347	1.28366	1.53089	1.58897	1.67909	1.46962	0.15588	0.325643	0.308233
		2.55	1.61393	1.28152	1.53214	1.58938	1.67867	1.47028	0.15677	0.326059	0.306736
		2.55333	1.61323	1.28153	1.53302	1.59203	1.67894	1.46999	0.156747	0.325245	0.306009
		2.55667	1.61555	1.28435	1.53424	1.59119	1.6779	1.4713	0.158531	0.324493	0.307189
		2.56	1.61477	1.28512	1.53262	1.59168	1.67741	1.46813	0.157945	0.324562	0.305715
		2.56333	1.61625	1.28681	1.53407	1.5913	1.67617	1.47062	0.156098	0.32398	0.305113
		2.56667	1.61533	1.28711	1.53258	1.59057	1.67663	1.46966	0.153555	0.324259	0.307275
		2.57	1.61453	1.28821	1.53449	1.58975	1.6759	1.47052	0.15454	0.32667	0.306769
		2.57333	1.61331	1.2878	1.53457	1.5894	1.67503	1.46991	0.153685	0.326799	0.305661
		2.57667	1.61395	1.28664	1.5357	1.58933	1.67674	1.4745	0.154626	0.326171	0.307225
		2.58	1.61091	1.28812	1.53642	1.59053	1.67961	1.47406	0.156189	0.325544	0.30754
		2.58333	1.61367	1.28916	1.53674	1.59066	1.67818	1.47749	0.157558	0.325433	0.307014
		2.58667	1.61636	1.28766	1.53542	1.5876	1.68107	1.47784	0.156714	0.324596	0.307722
		2.59	1.61775	1.28662	1.53554	1.58767	1.68252	1.47969	0.157245	0.326397	0.308283
		2.59333	1.61884	1.28666	1.53567	1.5887	1.6821	1.47629	0.156405	0.326647	0.306742
		2.59667	1.62	1.28697	1.53554	1.58722	1.68205	1.47434	0.155699	0.329525	0.306426
		2.6	1.61678	1.28571	1.53594	1.58548	1.68474	1.47305	0.155863	0.328858	0.305556
		2.60333	1.61504	1.28714	1.53789	1.58846	1.68153	1.47364	0.157009	0.328618	0.305293
		2.60667	1.61452	1.28842	1.5376	1.58975	1.683	1.47304	0.156439	0.327798	0.305369
		2.61	1.61411	1.28987	1.53769	1.59013	1.68309	1.47334	0.157428	0.329575	0.306371
		2.61333	1.61445	1.28916	1.53748	1.58916	1.68145	1.47387	0.156755	0.328563	0.307528
		2.61667	1.61647	1.29097	1.53775	1.59452	1.68166	1.47317	0.158108	0.32855	0.308829
		2.62	1.61811	1.29155	1.53512	1.59579	1.68146	1.47123	0.157753	0.329775	0.31041
		2.62333	1.61766	1.29186	1.53496	1.59685	1.68022	1.47142	0.158212	0.328951	0.310165
		2.62667	1.61704	1.29057	1.53537	1.59326	1.67993	1.47524	0.159312	0.328102	0.30922
		2.63	1.61987	1.2901	1.53445	1.59622	1.68388	1.47702	0.16204	0.327961	0.308998
		2.63333	1.61897	1.28983	1.53406	1.59131	1.68087	1.47906	0.161183	0.329285	0.308096
		2.63667	1.62016	1.28975	1.53521	1.59075	1.68348	1.4811	0.16137	0.329735	0.304416
		2.64	1.6194	1.28883	1.53521	1.58782	1.68657	1.48114	0.161296	0.330242	0.305218
		2.64333	1.62043	1.28985	1.53544	1.59145	1.68655	1.47982	0.16005	0.330545	0.306644
		2.64667	1.61894	1.2917	1.53609	1.58894	1.68436	1.47866	0.159284	0.331756	0.306097
		2.65	1.61852	1.29176	1.53584	1.58788	1.68755	1.4781	0.157675	0.331391	0.305803
		2.65333	1.61575	1.29094	1.53583	1.58901	1.68686	1.47933	0.158126	0.3299	0.307352
		2.65667	1.61532	1.29111	1.53718	1.59452	1.68406	1.47897	0.157917	0.330703	0.306942
		2.66	1.61468	1.29287	1.53675	1.59516	1.68433	1.47782	0.158877	0.330334	0.306266
		2.66333	1.61496	1.29181	1.53722	1.60089	1.68297	1.47756	0.158062	0.329013	0.306582
		2.66667	1.61524	1.29354	1.53818	1.60254	1.68277	1.47847	0.16061	0.330127	0.307813
		2.67	1.61722	1.29441	1.53817	1.60177	1.68227	1.47791	0.158788	0.330347	0.309352
		2.67333	1.62039	1.29568	1.53628	1.59991	1.68215	1.47877	0.160307	0.329934	0.308215
		2.67667	1.62107	1.29501	1.53681	1.59829	1.68285	1.4785	0.160485	0.329785	0.308188
		2.68	1.62177	1.29582	1.53581	1.5951	1.68456	1.48194	0.161923	0.33094	0.307876
		2.68333	1.62279	1.29535	1.53673	1.59607	1.68492	1.48127	0.161456	0.330058	0.309186
		2.68667	1.62304	1.29558	1.53747	1.59535	1.6856	1.48079	0.161602	0.329966	0.308589
		2.69	1.62303	1.29448	1.53969	1.59767	1.68555	1.47924	0.160571	0.330634	0.309039
		2.69333	1.62362	1.2939	1.53996	1.60061	1.6872	1.481	0.159352	0.331161	0.308643
		2.69667	1.62226	1.29441	1.5406	1.60147	1.68628	1.4808	0.158135	0.329978	0.309213
		2.7	1.62369	1.29474	1.5392	1.60208	1.68656	1.48028	0.156984	0.330504	0.307756
		2.70333	1.62313	1.29503	1.53876	1.60401	1.68703	1.48062	0.158126	0.331943	0.306952
		2.70667	1.62223	1.29721	1.53814	1.60034	1.68775	1.48237	0.158621	0.330511	0.308192
		2.71	1.62145	1.29763	1.53777	1.60051	1.68807	1.48314	0.160085	0.331529	0.308586
		2.71333	1.62364	1.298	1.53878	1.60047	1.68682	1.48246	0.160056	0.332428	0.309222
		2.71667	1.6226	1.29757	1.53974	1.60307	1.6881	1.48359	0.159671	0.331648	0.309975
		2.72	1.62327	1.29778	1.54027	1.60186	1.68787	1.48462	0.159851	0.33087	0.309254
		2.72333	1.62531	1.29716	1.54015	1.60296	1.68874	1.48621	0.160377	0.332221	0.309265
		2.72667	1.62598	1.29961	1.54088	1.60195	1.6892	1.48582	0.158818	0.331519	0.308917
		2.73	1.62643	1.29876	1.54147	1.60495	1.6906	1.48598	0.158971	0.329873	0.309398
		2.73333	1.6278	1.29881	1.54198	1.60533	1.69034	1.48638	0.159857	0.32957	0.308679
		2.73667	1.62716	1.29973	1.54372	1.60138	1.69184	1.48706	0.161145	0.329668	0.311128
		2.74	1.62568	1.29995	1.54377	1.60239	1.69386	1.48569	0.159296	0.328525	0.310725
		2.74333	1.62572	1.29789	1.54268	1.60475	1.69234	1.48652	0.160121	0.327551	0.311949
		2.74667	1.62407	1.30027	1.54322	1.60183	1.6929	1.48547	0.159148	0.328968	0.309867
		2.75	1.62209	1.3002	1.54269	1.59805	1.69258	1.48604	0.160186	0.328401	0.309528
		2.75333	1.62415	1.30003	1.54043	1.60176	1.69256	1.4855	0.157953	0.328801	0.309625
		2.75667	1.6255	1.30052	1.54025	1.59863	1.69145	1.48641	0.158766	0.329628	0.310172
		2.76	1.62668	1.302	1.54082	1.59801	1.69276	1.48622	0.160138	0.331045	0.30873
		2.76333	1.62792	1.30192	1.53951	1.59946	1.69214	1.48696	0.161285	0.330867	0.309484
		2.76667	1.6304	1.30379	1.5398	1.59699	1.69229	1.48614	0.159849	0.332684	0.309503
		2.77	1.62933	1.30418	1.53971	1.59752	1.69187	1.48505	0.161047	0.332287	0.307888
		2.77333	1.62974	1.30397	1.54118	1.60232	1.69083	1.48369	0.160283	0.332782	0.3094
		2.77667	1.63015	1.30375	1.54084	1.60268	1.68986	1.48199	0.158835	0.33184	0.310965
		2.78	1.63084	1.30343	1.53994	1.60207	1.68891	1.48319	0.159208	0.33267	0.312466
		2.78333	1.62896	1.30248	1.53997	1.60491	1.68908	1.48209	0.160035	0.332733	0.314181
		2.78667	1.62903	1.30254	1.53992	1.60624	1.68858	1.48278	0.159993	0.331833	0.316685
		2.79	1.62641	1.30268	1.53876	1.6047	1.68843	1.48523	0.161023	0.331536	0.315213
		2.79333	1.6254	1.30152	1.53962	1.60398	1.68949	1.48699	0.161458	0.332724	0.31535
		2.79667	1.62572	1.30173	1.54151	1.60827	1.69264	1.48428	0.16147	0.331886	0.315121
		2.8	1.6269	1.30175	1.54213	1.61141	1.69175	1.48531	0.159838	0.330508	0.315094
		2.80333	1.62575	1.30105	1.54237	1.61162	1.69323	1.48508	0.160697	0.332079	0.314433
		2.80667	1.62852	1.30056	1.54244	1.61164	1.69315	1.48431	0.160784	0.332116	0.315256
		2.81	1.62841	1.30323	1.5428	1.60967	1.69364	1.48372	0.160344	0.33096	0.314253
		2.81333	1.62758	1.30244	1.54105	1.60616	1.69358	1.4865	0.159702	0.331516	0.314571
		2.81667	1.62869	1.30236	1.54118	1.60265	1.69373	1.48615	0.162441	0.331551	0.314402
		2.82	1.62972	1.3039	1.54242	1.6014	1.69334	1.48748	0.162288	0.330913	0.314123
		2.82333	1.62765	1.30482	1.54254	1.60148	1.69531	1.48584	0.161562	0.330811	0.313918
		2.82667	1.62724	1.3025	1.54134	1.60184	1.69459	1.48731	0.162292	0.33158	0.315641
		2.83	1.62602	1.30443	1.54256	1.60188	1.69397	1.48653	0.162127	0.332069	0.315541
		2.83333	1.62486	1.30451	1.54238	1.60321	1.69492	1.48786	0.160752	0.333277	0.315543
		2.83667	1.62541	1.30425	1.54201	1.60133	1.69354	1.48714	0.159928	0.334029	0.315481
		2.84	1.62799	1.30382	1.54303	1.6014	1.69484	1.48769	0.159536	0.332725	0.315201
		2.84333	1.6299	1.30518	1.54462	1.60162	1.69465	1.48649	0.159957	0.333408	0.313288
		2.84667	1.6325	1.30422	1.54566	1.60213	1.69529	1.48599	0.160839	0.333245	0.314131
		2.85	1.63447	1.30617	1.54562	1.60125	1.69446	1.48567	0.162427	0.333448	0.314101
		2.85333	1.63514	1.30634	1.54647	1.60492	1.69624	1.48584	0.16167	0.33313	0.313562
		2.85667	1.63392	1.30751	1.54624	1.60631	1.69532	1.4874	0.162759	0.335153	0.314266
		2.86	1.63453	1.30749	1.54645	1.60737	1.69585	1.48851	0.162413	0.333926	0.315993
		2.86333	1.63423	1.30794	1.54638	1.60589	1.69474	1.49099	0.16167	0.333514	0.314958
		2.86667	1.63232	1.30713	1.54761	1.60843	1.69762	1.49151	0.160961	0.332432	0.314761
		2.87	1.63143	1.3076	1.54707	1.60695	1.69727	1.49423	0.160918	0.332483	0.315063
		2.87333	1.63312	1.30831	1.54756	1.60666	1.69668	1.4948	0.160996	0.332765	0.313343
		2.87667	1.63037	1.30947	1.54681	1.60787	1.69692	1.49528	0.160446	0.332972	0.312785
		2.88	1.62888	1.31003	1.54689	1.60589	1.6977	1.49305	0.159465	0.332998	0.312835
		2.88333	1.63021	1.30998	1.54677	1.61057	1.69565	1.49314	0.158036	0.333278	0.312999
		2.88667	1.63151	1.30957	1.54654	1.61437	1.69644	1.49132	0.159698	0.334036	0.311649
		2.89	1.63156	1.30973	1.54656	1.61351	1.69668	1.49096	0.161019	0.33354	0.313178
		2.89333	1.63342	1.31104	1.54758	1.61106	1.69639	1.49073	0.162082	0.333138	0.314579
		2.89667	1.63554	1.31046	1.54875	1.61626	1.69451	1.49206	0.163167	0.332849	0.312684
		2.9	1.63587	1.31076	1.54869	1.61008	1.69636	1.49134	0.163561	0.332832	0.312769
		2.90333	1.63739	1.31233	1.54813	1.60864	1.69602	1.49092	0.163975	0.332783	0.313516
		2.90667	1.63666	1.31175	1.54853	1.61124	1.6966	1.4913	0.163809	0.332368	0.312173
		2.91	1.63655	1.30975	1.54931	1.61295	1.69662	1.48958	0.162206	0.331797	0.310979
		2.91333	1.63637	1.31044	1.54812	1.61246	1.69894	1.49124	0.163329	0.332436	0.312611
		2.91667	1.63523	1.31091	1.54827	1.61369	1.6985	1.49343	0.16382	0.333169	0.312578
		2.92	1.63437	1.31089	1.55076	1.61044	1.69931	1.49497	0.16301	0.332923	0.314488
		2.92333	1.63383	1.31104	1.55026	1.6076	1.6985	1.49545	0.160792	0.333503	0.315104
		2.92667	1.63344	1.31265	1.54839	1.60864	1.69883	1.4971	0.160651	0.335924	0.314606
		2.93	1.63252	1.31219	1.54903	1.61165	1.69913	1.4967	0.159873	0.3359	0.315008
		2.93333	1.63324	1.31228	1.54889	1.61199	1.69891	1.49616	0.161029	0.335788	0.314655
		2.93667	1.63233	1.31289	1.54789	1.61586	1.69797	1.4964	0.16046	0.335658	0.312834
		2.94	1.6328	1.31365	1.54729	1.61799	1.69901	1.49718	0.162465	0.335817	0.314192
		2.94333	1.63371	1.31362	1.54845	1.61622	1.69826	1.49819	0.163162	0.33403	0.314781
		2.94667	1.63501	1.31426	1.5479	1.61191	1.69818	1.49812	0.163629	0.334113	0.314555
		2.95	1.63323	1.31449	1.54737	1.61293	1.69821	1.49883	0.163688	0.33469	0.314472
		2.95333	1.6327	1.31328	1.54596	1.61151	1.69872	1.49926	0.164099	0.335861	0.316183
		2.95667	1.63271	1.31355	1.54691	1.6118	1.69869	1.49855	0.163382	0.336719	0.315263
		2.96	1.63022	1.31234	1.54583	1.61305	1.70173	1.49789	0.163532	0.337668	0.315471
		2.96333	1.62921	1.31157	1.54515	1.61479	1.7018	1.49699	0.163865	0.337955	0.315066
		2.96667	1.62945	1.3128	1.54501	1.6132	1.70485	1.49553	0.162236	0.338149	0.315195
		2.97	1.63131	1.31346	1.54587	1.61227	1.70325	1.49376	0.163122	0.336347	0.31401
		2.97333	1.63236	1.31342	1.54641	1.61397	1.70499	1.4936	0.163806	0.334655	0.315895
		2.97667	1.63447	1.31628	1.54819	1.61646	1.70295	1.49349	0.164475	0.334186	0.315165
		2.98	1.63515	1.31812	1.54825	1.61611	1.70359	1.49241	0.164498	0.33471	0.315808
		2.98333	1.6377	1.31813	1.5488	1.61909	1.69868	1.49329	0.164307	0.334325	0.317063
		2.98667	1.63764	1.31971	1.5489	1.62119	1.70049	1.49549	0.164967	0.333808	0.317761
		2.99	1.63701	1.321	1.54845	1.61803	1.69912	1.49606	0.165676	0.333994	0.316522
		2.99333	1.63745	1.31971	1.54887	1.61739	1.70043	1.49632	0.16465	0.335332	0.318121
		2.99667	1.638	1.31842	1.55007	1.61934	1.70013	1.49759	0.163734	0.335624	0.318898
		3	1.63799	1.31728	1.55	1.6156	1.70173	1.49691	0.163733	0.335213	0.31744
		3.00333	1.6387	1.31687	1.55086	1.61162	1.70232	1.49707	0.162631	0.336905	0.317063
		3.00667	1.64105	1.31571	1.54988	1.61185	1.70253	1.49795	0.161477	0.337012	0.317413
		3.01	1.6425	1.3166	1.54906	1.61311	1.70173	1.49898	0.161528	0.335753	0.317398
		3.01333	1.64263	1.31786	1.54891	1.60823	1.70302	1.50023	0.162836	0.334717	0.315802
		3.01667	1.64279	1.31895	1.54975	1.60991	1.705	1.50212	0.164534	0.334894	0.316045
		3.02	1.64153	1.31842	1.54976	1.6127	1.70383	1.50021	0.16351	0.33434	0.31682
		3.02333	1.64044	1.31943	1.55091	1.61436	1.70333	1.49993	0.164453	0.335952	0.31629
		3.02667	1.63916	1.31868	1.55093	1.61191	1.70413	1.49937	0.165411	0.33525	0.315417
		3.03	1.64039	1.31903	1.55127	1.61615	1.70466	1.50096	0.164081	0.335276	0.317388
		3.03333	1.63968	1.3209	1.55202	1.61775	1.70395	1.49989	0.162885	0.334554	0.318841
		3.03667	1.6414	1.3216	1.55209	1.62078	1.706	1.50193	0.164454	0.334823	0.318279
		3.04	1.64262	1.32059	1.55209	1.61863	1.70649	1.50067	0.164547	0.334359	0.317715
		3.04333	1.64297	1.32029	1.55316	1.61963	1.70598	1.50005	0.164451	0.335875	0.318592
		3.04667	1.64224	1.32092	1.55239	1.61602	1.70665	1.49895	0.165351	0.335187	0.318454
		3.05	1.64343	1.32001	1.55237	1.61864	1.70639	1.49818	0.166053	0.336218	0.318306
		3.05333	1.6411	1.3198	1.55136	1.61469	1.70605	1.49571	0.164897	0.337344	0.31873
		3.05667	1.6402	1.31941	1.55174	1.61708	1.70604	1.49555	0.164356	0.336273	0.318786
		3.06	1.63995	1.31839	1.5515	1.61801	1.70705	1.4953	0.165075	0.337213	0.318493
		3.06333	1.63944	1.31907	1.55258	1.6182	1.70563	1.49466	0.165698	0.338346	0.318114
		3.06667	1.63916	1.31919	1.55213	1.61331	1.706	1.49434	0.165216	0.338322	0.31829
		3.07	1.64179	1.31996	1.55289	1.61638	1.70621	1.49552	0.166204	0.337302	0.319234
		3.07333	1.64245	1.32162	1.55342	1.61362	1.70547	1.49624	0.165715	0.338652	0.318636
		3.07667	1.64414	1.32375	1.55412	1.61366	1.70556	1.49788	0.165215	0.337831	0.318959
		3.08	1.64565	1.32102	1.55386	1.61694	1.70637	1.50043	0.165256	0.33677	0.318436
		3.08333	1.64658	1.32118	1.5536	1.61895	1.70535	1.50279	0.166091	0.337134	0.317003
		3.08667	1.64628	1.32105	1.55504	1.61913	1.70447	1.50426	0.165222	0.337381	0.315943
		3.09	1.64526	1.32164	1.55395	1.62117	1.70689	1.5055	0.164842	0.337122	0.316422
		3.09333	1.64484	1.32252	1.5532	1.62071	1.70701	1.50549	0.16371	0.336574	0.315468
		3.09667	1.64462	1.32519	1.55211	1.61943	1.70602	1.50235	0.162403	0.337389	0.315536
		3.1	1.64529	1.32559	1.552	1.618	1.70761	1.50078	0.161656	0.336473	0.314816
		3.10333	1.64445	1.32471	1.55094	1.61833	1.70895	1.50134	0.161229	0.338562	0.315756
		3.10667	1.64509	1.32555	1.55228	1.61836	1.70686	1.49983	0.162526	0.337593	0.315293
		3.11	1.64454	1.3252	1.55221	1.61652	1.70695	1.49934	0.162471	0.338136	0.317782
		3.11333	1.64403	1.32474	1.55473	1.61975	1.7064	1.49954	0.162895	0.338569	0.317411
		3.11667	1.64205	1.32459	1.55561	1.62216	1.70625	1.49993	0.163573	0.338748	0.317337
		3.12	1.64322	1.32631	1.55514	1.61789	1.70573	1.49993	0.164478	0.337362	0.316721
		3.12333	1.64351	1.32546	1.55441	1.61819	1.70742	1.50086	0.1655	0.338143	0.31817
		3.12667	1.64334	1.32623	1.55466	1.61778	1.7076	1.50183	0.165492	0.338021	0.316075
		3.13	1.64375	1.32578	1.55415	1.61528	1.70922	1.50241	0.166487	0.338129	0.317009
		3.13333	1.64415	1.3261	1.55398	1.61721	1.71152	1.50278	0.166403	0.338457	0.318732
		3.13667	1.64499	1.32518	1.5556	1.62101	1.71306	1.50321	0.167207	0.338504	0.318599
		3.14	1.64572	1.32592	1.55577	1.61863	1.7126	1.50249	0.165175	0.338079	0.319247
		3.14333	1.64593	1.32499	1.55503	1.6225	1.71245	1.50187	0.166187	0.338793	0.319627
		3.14667	1.6453	1.32484	1.55501	1.62398	1.71164	1.50085	0.164353	0.338841	0.318798
		3.15	1.64667	1.32466	1.55501	1.61937	1.71037	1.50078	0.164943	0.340521	0.317825
		3.15333	1.64462	1.32546	1.55439	1.61897	1.70795	1.50078	0.162622	0.33966	0.318122
		3.15667	1.64413	1.32419	1.55511	1.62112	1.70731	1.50276	0.164209	0.339908	0.318633
		3.16	1.64393	1.32411	1.55628	1.61985	1.70701	1.50323	0.163669	0.339215	0.318587
		3.16333	1.64477	1.32529	1.55708	1.62271	1.70871	1.50512	0.165034	0.339451	0.319461
		3.16667	1.64251	1.32529	1.55707	1.62578	1.70759	1.50629	0.16411	0.338201	0.321975
		3.17	1.64064	1.3251	1.55742	1.62475	1.70892	1.50427	0.164563	0.337731	0.32198
		3.17333	1.63965	1.32557	1.55687	1.62509	1.70977	1.50289	0.163219	0.338019	0.320328
		3.17667	1.63931	1.32694	1.55677	1.62496	1.71151	1.503	0.163446	0.338797	0.320751
		3.18	1.63806	1.32624	1.5555	1.61701	1.71023	1.50369	0.164034	0.338446	0.320912
		3.18333	1.63836	1.3272	1.55624	1.61642	1.71077	1.5019	0.164746	0.337964	0.3197
		3.18667	1.64099	1.32695	1.55656	1.61626	1.71096	1.50378	0.165315	0.339321	0.319743
		3.19	1.64207	1.32742	1.55793	1.61817	1.7085	1.50387	0.166807	0.339255	0.320697
		3.19333	1.64319	1.32819	1.55781	1.61929	1.70729	1.50482	0.16705	0.338654	0.320797
		3.19667	1.64324	1.33007	1.55783	1.62514	1.70989	1.50639	0.167453	0.338741	0.321459
		3.2	1.64568	1.32937	1.55767	1.62806	1.71136	1.50871	0.166906	0.339135	0.321649
		3.20333	1.6463	1.33029	1.55672	1.6301	1.71009	1.50958	0.168418	0.338769	0.321412
		3.20667	1.64592	1.33089	1.55676	1.62763	1.71589	1.50984	0.167768	0.337599	0.321165
		3.21	1.6461	1.32907	1.55704	1.62916	1.71569	1.50973	0.168561	0.337259	0.320463
		3.21333	1.64658	1.32742	1.55768	1.62484	1.71358	1.5101	0.167098	0.336938	0.319842
		3.21667	1.64633	1.32861	1.55753	1.61953	1.71329	1.51215	0.167598	0.336078	0.320125
		3.22	1.64506	1.32953	1.55733	1.61779	1.71547	1.51138	0.167129	0.336097	0.319643
		3.22333	1.64544	1.32962	1.55686	1.62125	1.71264	1.51255	0.166937	0.336661	0.318987
		3.22667	1.64452	1.33139	1.55663	1.61781	1.71313	1.51094	0.165908	0.337507	0.320409
		3.23	1.64556	1.33202	1.55648	1.62243	1.71389	1.51131	0.167681	0.337863	0.321545
		3.23333	1.64397	1.33124	1.55644	1.62663	1.71384	1.50938	0.167316	0.337912	0.320894
		3.23667	1.64263	1.32976	1.55809	1.6277	1.71242	1.50995	0.166228	0.338229	0.322139
		3.24	1.64272	1.33003	1.55709	1.62522	1.71372	1.50939	0.165501	0.339463	0.322661
		3.24333	1.64205	1.32976	1.55758	1.62622	1.714	1.5112	0.165703	0.339326	0.320621
		3.24667	1.6414	1.33012	1.55835	1.62746	1.71302	1.50817	0.165337	0.339382	0.320411
		3.25	1.64188	1.33076	1.5586	1.62785	1.71415	1.51054	0.165926	0.339718	0.320505
		3.25333	1.64338	1.33231	1.55907	1.63064	1.71531	1.50966	0.16475	0.340075	0.319629
		3.25667	1.64288	1.33342	1.56053	1.63299	1.71474	1.51099	0.165564	0.340311	0.320166
		3.26	1.644	1.33415	1.56004	1.63536	1.71454	1.51077	0.16666	0.340601	0.320931
		3.26333	1.64394	1.33371	1.56126	1.63512	1.71607	1.51033	0.164964	0.340316	0.319937
		3.26667	1.64477	1.33489	1.56193	1.63531	1.71481	1.51095	0.164722	0.341492	0.319332
		3.27	1.64597	1.33391	1.56071	1.6331	1.7166	1.51245	0.166816	0.341541	0.320029
		3.27333	1.64755	1.33301	1.56076	1.63261	1.71624	1.5128	0.16742	0.341875	0.319411
		3.27667	1.64738	1.33319	1.56055	1.63182	1.71788	1.51126	0.168352	0.341371	0.318903
		3.28	1.64876	1.33176	1.56002	1.62894	1.71705	1.51452	0.169918	0.339669	0.320169
		3.28333	1.64741	1.3306	1.56004	1.6265	1.71738	1.51038	0.167686	0.338827	0.320305
		3.28667	1.64698	1.33067	1.55973	1.62694	1.7173	1.50899	0.167455	0.337404	0.320255
		3.29	1.64734	1.33032	1.55975	1.62729	1.71704	1.50849	0.16722	0.33616	0.321029
		3.29333	1.64889	1.33051	1.56111	1.62822	1.71633	1.5114	0.166223	0.335458	0.321743
		3.29667	1.64706	1.33383	1.56109	1.63082	1.71664	1.51345	0.165641	0.338167	0.320453
		3.3	1.64852	1.33407	1.56018	1.63322	1.71707	1.51596	0.167956	0.336346	0.321285
		3.30333	1.64833	1.33462	1.56096	1.63625	1.71503	1.51738	0.167637	0.336616	0.322136
		3.30667	1.64772	1.33571	1.55988	1.63604	1.71612	1.51747	0.167353	0.337115	0.320567
		3.31	1.64656	1.33525	1.55922	1.6362	1.71491	1.51707	0.167069	0.338183	0.320598
		3.31333	1.64871	1.33456	1.5594	1.63764	1.71709	1.51401	0.16737	0.337326	0.322112
		3.31667	1.64849	1.33477	1.56146	1.63885	1.71826	1.51287	0.167796	0.338904	0.320605
		3.32	1.64812	1.33439	1.56072	1.63728	1.71678	1.51041	0.167695	0.339463	0.321599
		3.32333	1.64714	1.33406	1.56187	1.63588	1.71897	1.51113	0.167979	0.337985	0.323353
		3.32667	1.64749	1.33378	1.56213	1.63399	1.72045	1.51136	0.167821	0.337491	0.324781
		3.33	1.64715	1.33346	1.56197	1.6336	1.72017	1.51459	0.16625	0.337762	0.32385
		3.33333	1.64708	1.33426	1.56192	1.63222	1.71907	1.51586	0.164286	0.338987	0.325223
		3.33667	1.64818	1.3361	1.56277	1.63115	1.72222	1.5193	0.16475	0.338265	0.323048
		3.34	1.64895	1.33679	1.56245	1.63375	1.72103	1.51998	0.165058	0.338906	0.323007
		3.34333	1.64791	1.33725	1.56191	1.63516	1.72105	1.51894	0.165939	0.339085	0.323029
		3.34667	1.64751	1.33775	1.56175	1.63208	1.72077	1.51627	0.166932	0.338492	0.322567
		3.35	1.64798	1.33762	1.56088	1.63068	1.72184	1.51534	0.168027	0.337123	0.322421
		3.35333	1.6481	1.33657	1.56148	1.63034	1.7207	1.51469	0.167385	0.337207	0.322843
		3.35667	1.64834	1.33736	1.56229	1.63002	1.72014	1.51455	0.167284	0.336609	0.323694
		3.36	1.64928	1.33731	1.56307	1.63029	1.71984	1.51589	0.16556	0.336032	0.322532
		3.36333	1.64935	1.33758	1.56295	1.63194	1.71848	1.51699	0.165875	0.335214	0.321732
		3.36667	1.64868	1.33797	1.56337	1.6339	1.71613	1.51808	0.166657	0.335518	0.322717
		3.37	1.64801	1.33865	1.56391	1.63659	1.71841	1.51929	0.167439	0.335978	0.322018
		3.37333	1.64658	1.33819	1.56408	1.63623	1.71794	1.52116	0.167412	0.337592	0.320451
		3.37667	1.64585	1.33954	1.56446	1.63627	1.71712	1.52124	0.168819	0.338424	0.321402
		3.38	1.6445	1.3397	1.56523	1.63693	1.71982	1.52167	0.169362	0.339944	0.321802
		3.38333	1.64393	1.34038	1.56512	1.63655	1.72138	1.52142	0.168803	0.338486	0.323351
		3.38667	1.64463	1.33986	1.56461	1.63383	1.72113	1.52041	0.16817	0.33896	0.323921
		3.39	1.64704	1.33795	1.56411	1.63149	1.72168	1.51783	0.168723	0.338664	0.324442
		3.39333	1.64895	1.33782	1.56507	1.63097	1.72279	1.51652	0.167094	0.338848	0.323533
		3.39667	1.65005	1.33807	1.56524	1.63047	1.71958	1.5152	0.167941	0.337786	0.324978
		3.4	1.65097	1.33728	1.56428	1.62985	1.71988	1.51533	0.167261	0.339236	0.323425
		3.40333	1.64944	1.33658	1.5641	1.6301	1.71873	1.51401	0.167629	0.337548	0.322392
		3.40667	1.64827	1.33925	1.56438	1.63272	1.71783	1.51417	0.16686	0.335599	0.322366
		3.41	1.64592	1.34059	1.56352	1.63245	1.71788	1.51564	0.168509	0.33478	0.323508
		3.41333	1.64692	1.34	1.56321	1.63407	1.71883	1.51726	0.167513	0.335395	0.323453
		3.41667	1.64758	1.34106	1.56421	1.63516	1.71932	1.5168	0.168674	0.335324	0.323487
		3.42	1.64755	1.34193	1.56474	1.63662	1.71948	1.51764	0.167932	0.336613	0.324486
		3.42333	1.6494	1.34081	1.56441	1.63516	1.7196	1.51821	0.169465	0.339368	0.324311
		3.42667	1.65046	1.33856	1.56395	1.6361	1.72065	1.51617	0.169302	0.339548	0.324285
		3.43	1.6492	1.33853	1.56333	1.63624	1.72166	1.51674	0.16829	0.340821	0.322982
		3.43333	1.64751	1.33749	1.56326	1.63638	1.72047	1.51778	0.167459	0.340572	0.322762
		3.43667	1.64941	1.33781	1.56191	1.63552	1.72044	1.51637	0.169243	0.340461	0.322393
		3.44	1.64735	1.33891	1.56269	1.6361	1.72033	1.51617	0.166738	0.34023	0.322913
		3.44333	1.64881	1.33976	1.56395	1.63383	1.71799	1.51926	0.167627	0.339645	0.320723
		3.44667	1.65062	1.34066	1.56477	1.63065	1.72168	1.51825	0.167447	0.338905	0.321118
		3.45	1.65117	1.34173	1.56448	1.62882	1.71929	1.52011	0.167364	0.339858	0.321006
		3.45333	1.65081	1.34335	1.56509	1.6284	1.72184	1.5231	0.166748	0.340034	0.322189
		3.45667	1.64968	1.34278	1.56531	1.62826	1.72491	1.52519	0.168166	0.339428	0.322829
		3.46	1.64814	1.34151	1.56472	1.62882	1.72677	1.52508	0.16673	0.34124	0.324654
		3.46333	1.64763	1.3408	1.56472	1.62812	1.72253	1.52543	0.169404	0.34044	0.324267
		3.46667	1.64849	1.34002	1.56505	1.63393	1.72503	1.52243	0.168837	0.340392	0.324306
		3.47	1.64857	1.33881	1.56527	1.63339	1.72299	1.52271	0.16922	0.339806	0.325381
		3.47333	1.65133	1.33901	1.56551	1.63608	1.72109	1.5224	0.169425	0.338884	0.324266
		3.47667	1.65278	1.34168	1.56613	1.64133	1.72221	1.52174	0.170461	0.336783	0.322585
		3.48	1.65085	1.34111	1.56682	1.64313	1.72323	1.52233	0.168741	0.336376	0.323898
		3.48333	1.65199	1.34222	1.5669	1.63768	1.72277	1.5207	0.169579	0.337293	0.323794
		3.48667	1.65124	1.34353	1.56742	1.63916	1.72327	1.51943	0.171351	0.337813	0.322918
		3.49	1.65169	1.34321	1.56781	1.63578	1.72323	1.51787	0.171895	0.339047	0.323346
		3.49333	1.65232	1.342	1.56756	1.63255	1.72177	1.5183	0.170916	0.339397	0.325081
		3.49667	1.65491	1.34354	1.56743	1.63229	1.72111	1.51706	0.172827	0.340041	0.323674
		3.5	1.65521	1.34408	1.56825	1.63371	1.72095	1.52011	0.173901	0.339016	0.3235
		3.50333	1.65607	1.34401	1.56883	1.63635	1.72118	1.52108	0.171405	0.338773	0.322626
		3.50667	1.65448	1.34561	1.56868	1.63716	1.72086	1.52215	0.170106	0.338774	0.322993
		3.51	1.65448	1.34579	1.56937	1.63727	1.72104	1.52201	0.170181	0.339719	0.323781
		3.51333	1.65342	1.34506	1.56877	1.6397	1.72151	1.52295	0.168221	0.339463	0.32411
		3.51667	1.6514	1.34307	1.56936	1.64228	1.7226	1.52325	0.167565	0.338552	0.324736
		3.52	1.65083	1.34318	1.56759	1.63822	1.72297	1.52274	0.166815	0.337647	0.326353
		3.52333	1.65185	1.34237	1.56703	1.64126	1.723	1.5219	0.165808	0.337351	0.324584
		3.52667	1.65147	1.34246	1.56684	1.64	1.72269	1.52192	0.167089	0.336954	0.323702
		3.53	1.65167	1.34393	1.56745	1.63922	1.72215	1.52169	0.167332	0.337016	0.323346
		3.53333	1.65195	1.34534	1.56695	1.63508	1.72197	1.52126	0.166526	0.337629	0.322871
		3.53667	1.6528	1.34469	1.56917	1.63733	1.72053	1.52361	0.167843	0.338319	0.321339
		3.54	1.65184	1.34567	1.56787	1.63476	1.71944	1.52459	0.169379	0.338478	0.323977
		3.54333	1.65032	1.34668	1.56727	1.63673	1.71958	1.52454	0.167491	0.338798	0.323294
		3.54667	1.64944	1.34637	1.56826	1.63436	1.7226	1.5245	0.169096	0.338279	0.323765
		3.55	1.64957	1.3455	1.56876	1.63625	1.72338	1.5253	0.169593	0.339528	0.324276
		3.55333	1.65124	1.3461	1.56676	1.63702	1.72084	1.52428	0.169595	0.339365	0.324967
		3.55667	1.65271	1.34646	1.56949	1.63935	1.72505	1.52523	0.169717	0.338863	0.32345
		3.56	1.65521	1.34741	1.57031	1.63453	1.72456	1.52518	0.169917	0.338901	0.324666
		3.56333	1.65638	1.34907	1.56864	1.6406	1.72188	1.52646	0.167689	0.339628	0.324885
		3.56667	1.65638	1.34992	1.56901	1.64044	1.72081	1.5259	0.167539	0.337846	0.32454
		3.57	1.65498	1.35018	1.57024	1.63978	1.72524	1.526	0.167922	0.338226	0.324774
		3.57333	1.65479	1.35032	1.56851	1.63815	1.72238	1.52484	0.1681	0.338844	0.326391
		3.57667	1.65533	1.34829	1.56799	1.64116	1.72321	1.52617	0.168284	0.339617	0.324366
		3.58	1.65617	1.34778	1.56953	1.63637	1.7253	1.52564	0.16911	0.338249	0.325627
		3.58333	1.65756	1.34752	1.57024	1.63807	1.72582	1.5254	0.169424	0.337504	0.326453
		3.58667	1.65705	1.34623	1.57068	1.63737	1.72407	1.52538	0.168989	0.338157	0.325533
		3.59	1.65611	1.34692	1.57122	1.63808	1.72516	1.5257	0.168569	0.336987	0.324837
		3.59333	1.65469	1.34765	1.57127	1.63904	1.72564	1.52579	0.168705	0.334618	0.326688
		3.59667	1.65472	1.34748	1.57143	1.63896	1.72236	1.52626	0.168539	0.336242	0.325446
		3.6	1.65271	1.34793	1.56921	1.63835	1.72465	1.52687	0.168383	0.337046	0.325308
		3.60333	1.65289	1.35029	1.56926	1.63848	1.72419	1.52499	0.170129	0.335973	0.326114
		3.60667	1.65377	1.349	1.56847	1.6383	1.72362	1.52502	0.170207	0.336979	0.325393
		3.61	1.65439	1.34981	1.56906	1.63883	1.7231	1.52408	0.169752	0.338224	0.324695
		3.61333	1.65397	1.34936	1.5694	1.63991	1.72411	1.52446	0.170707	0.338711	0.325558
		3.61667	1.65547	1.35105	1.57019	1.63701	1.72258	1.52454	0.171683	0.339104	0.324818
		3.62	1.65543	1.34964	1.56929	1.63931	1.72436	1.5268	0.169002	0.340427	0.324641
		3.62333	1.65489	1.35047	1.57008	1.63904	1.72407	1.52769	0.169596	0.339453	0.325348
		3.62667	1.65391	1.35073	1.56978	1.63995	1.72446	1.52847	0.170175	0.338052	0.324992
		3.63	1.6545	1.35178	1.5685	1.6406	1.72542	1.52771	0.169157	0.338341	0.325665
		3.63333	1.65595	1.35038	1.56983	1.6422	1.72546	1.52833	0.169414	0.338787	0.325188
		3.63667	1.65613	1.35098	1.57093	1.64297	1.72664	1.52901	0.170266	0.337407	0.326379
		3.64	1.65793	1.35069	1.57091	1.64105	1.72634	1.5289	0.169629	0.337293	0.324967
		3.64333	1.65829	1.35063	1.57068	1.64187	1.72693	1.5297	0.170005	0.337891	0.326338
		3.64667	1.65727	1.35	1.57008	1.64226	1.72653	1.53101	0.17071	0.33635	0.325354
		3.65	1.65576	1.34993	1.56853	1.64223	1.72634	1.53087	0.169548	0.337654	0.326063
		3.65333	1.65534	1.3502	1.5687	1.63808	1.72509	1.53001	0.169707	0.337414	0.325429
		3.65667	1.65538	1.35087	1.56868	1.64028	1.72487	1.52879	0.169859	0.339031	0.325543
		3.66	1.65601	1.35003	1.56957	1.63822	1.72624	1.52853	0.169769	0.340674	0.325884
		3.66333	1.65884	1.35117	1.57184	1.63815	1.72893	1.52778	0.170882	0.340425	0.32561
		3.66667	1.65984	1.35208	1.57294	1.6379	1.726	1.52743	0.170212	0.338993	0.326534
		3.67	1.66076	1.35234	1.5723	1.63921	1.72876	1.52573	0.170408	0.338957	0.325354
		3.67333	1.65936	1.35199	1.57308	1.63782	1.73019	1.52572	0.170075	0.337791	0.326428
		3.67667	1.65969	1.35476	1.57333	1.63953	1.72743	1.52555	0.169447	0.336259	0.325512
		3.68	1.65747	1.35324	1.57218	1.63977	1.7254	1.52503	0.168774	0.337997	0.326801
		3.68333	1.65564	1.35356	1.57116	1.64397	1.72912	1.5246	0.168636	0.337957	0.326606
		3.68667	1.65777	1.35407	1.57253	1.64212	1.72721	1.52715	0.168824	0.339153	0.326268
		3.69	1.65884	1.35415	1.57272	1.64334	1.72581	1.52731	0.169784	0.340528	0.32748
		3.69333	1.65941	1.35287	1.57227	1.64122	1.7265	1.5273	0.170793	0.340967	0.326683
		3.69667	1.66077	1.35405	1.57206	1.64067	1.72608	1.52855	0.169523	0.33912	0.325298
		3.7	1.66194	1.35373	1.57373	1.63894	1.72532	1.52864	0.170941	0.338745	0.323632
		3.70333	1.66094	1.35284	1.57331	1.64558	1.72503	1.52794	0.170979	0.337725	0.324418
		3.70667	1.65982	1.35445	1.5726	1.6407	1.726	1.52859	0.172317	0.336176	0.323404
		3.71	1.65925	1.35441	1.5723	1.64696	1.72739	1.52947	0.171908	0.336263	0.324131
		3.71333	1.65826	1.35438	1.57246	1.64476	1.72674	1.52874	0.173468	0.336082	0.324303
		3.71667	1.65925	1.35406	1.572	1.64342	1.72642	1.53053	0.172035	0.336637	0.325948
		3.72	1.65992	1.35494	1.57257	1.63711	1.72581	1.52891	0.171401	0.336507	0.327058
		3.72333	1.66186	1.35335	1.57237	1.64279	1.7267	1.52914	0.169971	0.337381	0.326938
		3.72667	1.66143	1.354	1.57395	1.63586	1.72533	1.52757	0.170421	0.338321	0.32621
		3.73	1.66258	1.355	1.57463	1.63857	1.72711	1.52823	0.16884	0.340209	0.326737
		3.73333	1.6614	1.35425	1.57654	1.64038	1.72588	1.52702	0.16968	0.33975	0.327394
		3.73667	1.65981	1.35594	1.57569	1.64352	1.72634	1.5284	0.170348	0.338809	0.325607
		3.74	1.65817	1.35632	1.57716	1.64093	1.72566	1.52745	0.168972	0.338392	0.325231
		3.74333	1.65924	1.35644	1.5758	1.64107	1.72432	1.52891	0.170282	0.336975	0.326588
		3.74667	1.65909	1.35636	1.57511	1.64012	1.72301	1.5292	0.171001	0.33518	0.326506
		3.75	1.65951	1.35718	1.57357	1.63972	1.72322	1.5291	0.171572	0.33455	0.324608
		3.75333	1.66068	1.3556	1.57362	1.63855	1.72102	1.53102	0.171647	0.335632	0.32587
		3.75667	1.6622	1.35542	1.57324	1.64114	1.72081	1.53358	0.172465	0.335863	0.326294
		3.76	1.66347	1.35524	1.57333	1.6411	1.7238	1.53437	0.171521	0.335118	0.326634
		3.76333	1.66399	1.35444	1.57433	1.64139	1.72413	1.53451	0.172447	0.336583	0.325588
		3.76667	1.66524	1.35559	1.57436	1.63934	1.72701	1.53324	0.17191	0.336562	0.325643
		3.77	1.66419	1.35589	1.57539	1.641	1.72893	1.53208	0.172487	0.336974	0.325663
		3.77333	1.66584	1.35628	1.57489	1.63878	1.72918	1.53111	0.172407	0.336909	0.325991
		3.77667	1.66358	1.35604	1.57584	1.63997	1.72645	1.53144	0.171042	0.33774	0.326559
		3.78	1.6639	1.35583	1.57504	1.63879	1.72675	1.53175	0.170832	0.337689	0.327061
		3.78333	1.66394	1.35426	1.57421	1.63969	1.72525	1.53394	0.17025	0.336804	0.329371
		3.78667	1.66435	1.35524	1.57376	1.6382	1.72524	1.536	0.168632	0.338347	0.330522
		3.79	1.66261	1.35554	1.57504	1.6426	1.72523	1.53644	0.168478	0.338622	0.329938
		3.79333	1.66379	1.35685	1.57547	1.6422	1.72698	1.53566	0.170456	0.339395	0.330866
		3.79667	1.66262	1.35714	1.57634	1.64284	1.72594	1.53695	0.169619	0.338462	0.331648
		3.8	1.66161	1.35851	1.57769	1.64227	1.72749	1.53888	0.170546	0.33938	0.330457
		3.80333	1.66204	1.35732	1.57932	1.64271	1.72933	1.53746	0.170851	0.338053	0.329341
		3.80667	1.66221	1.3571	1.57949	1.64201	1.72944	1.53819	0.171673	0.337291	0.330024
		3.81	1.66167	1.35479	1.57792	1.64605	1.7317	1.53867	0.170728	0.337104	0.328094
		3.81333	1.66321	1.35613	1.57773	1.64721	1.73182	1.53766	0.171274	0.338288	0.326786
		3.81667	1.66471	1.35645	1.57768	1.64784	1.73146	1.53577	0.170881	0.339406	0.328212
		3.82	1.66484	1.35639	1.57726	1.64817	1.73143	1.53346	0.171509	0.339813	0.3275
		3.82333	1.66361	1.35656	1.57681	1.64862	1.73349	1.53328	0.170741	0.340514	0.328528
		3.82667	1.66393	1.35927	1.57809	1.64744	1.7301	1.53281	0.168999	0.34151	0.327598
		3.83	1.66221	1.35996	1.57794	1.6496	1.73198	1.53376	0.169304	0.341197	0.32858
		3.83333	1.6602	1.35942	1.57769	1.64911	1.73301	1.53262	0.170561	0.340852	0.32762
		3.83667	1.66	1.35983	1.57743	1.64882	1.73245	1.53535	0.170217	0.341177	0.327519
		3.84	1.66178	1.35969	1.57803	1.64826	1.72997	1.53345	0.171973	0.341041	0.325174
		3.84333	1.66321	1.35862	1.57703	1.64541	1.73081	1.5334	0.174255	0.33939	0.327217
		3.84667	1.66365	1.35661	1.57709	1.64288	1.72846	1.53304	0.172747	0.337974	0.326798
		3.85	1.66556	1.35822	1.57721	1.64367	1.72739	1.53562	0.171771	0.336976	0.325126
		3.85333	1.66624	1.35826	1.57708	1.64389	1.72561	1.53624	0.172623	0.335016	0.326484
		3.85667	1.66589	1.35958	1.57531	1.64298	1.72706	1.53809	0.17101	0.335369	0.326672
		3.86	1.66426	1.35998	1.57699	1.64471	1.72917	1.53825	0.170487	0.335437	0.326336
		3.86333	1.66415	1.36147	1.57762	1.64651	1.73131	1.53586	0.170714	0.337904	0.327562
		3.86667	1.66378	1.36087	1.57901	1.64813	1.72963	1.53526	0.17128	0.338022	0.327754
		3.87	1.66445	1.36199	1.57858	1.64901	1.7294	1.53559	0.170833	0.3385	0.326014
		3.87333	1.66366	1.36124	1.58029	1.64931	1.73226	1.53626	0.171542	0.337246	0.32629
		3.87667	1.6656	1.36114	1.58057	1.64997	1.73012	1.53645	0.171503	0.336809	0.325203
		3.88	1.66688	1.36094	1.58063	1.647	1.72964	1.54019	0.173459	0.334632	0.322784
		3.88333	1.66848	1.3598	1.57801	1.64601	1.72907	1.53961	0.171517	0.334622	0.321013
		3.88667	1.6672	1.35835	1.578	1.64782	1.73055	1.53783	0.170571	0.33486	0.322142
		3.89	1.66934	1.35849	1.57792	1.65007	1.72714	1.53783	0.169958	0.336039	0.323307
		3.89333	1.6682	1.3589	1.57538	1.64913	1.72679	1.53839	0.171229	0.336867	0.32189
		3.89667	1.66745	1.35918	1.57588	1.65355	1.72708	1.53376	0.169964	0.337783	0.324456
		3.9	1.66514	1.36143	1.5779	1.65085	1.72963	1.53315	0.172918	0.337932	0.327919
		3.90333	1.66531	1.36293	1.57824	1.64728	1.72899	1.53475	0.17398	0.338705	0.327178
		3.90667	1.66358	1.3637	1.5786	1.64438	1.72746	1.53278	0.174854	0.337762	0.327961
		3.91	1.66265	1.36414	1.5809	1.64499	1.72898	1.53316	0.17401	0.337954	0.329307
		3.91333	1.66147	1.36388	1.57901	1.64303	1.72855	1.53732	0.174776	0.337419	0.328513
		3.91667	1.66265	1.36252	1.57776	1.64659	1.72848	1.54064	0.172164	0.337182	0.325972
		3.92	1.66347	1.36234	1.57805	1.64441	1.72827	1.53973	0.173572	0.337189	0.326663
		3.92333	1.66455	1.3631	1.57842	1.64393	1.73052	1.54186	0.173018	0.338421	0.324071
		3.92667	1.66604	1.36335	1.57861	1.64454	1.73264	1.54163	0.172557	0.337849	0.32295
		3.93	1.66727	1.36438	1.58054	1.64559	1.73197	1.53885	0.17184	0.337957	0.322618
		3.93333	1.66653	1.36492	1.57947	1.64643	1.73423	1.53872	0.172669	0.338084	0.323298
		3.93667	1.66518	1.36627	1.57954	1.65163	1.73492	1.53977	0.171319	0.337626	0.323509
		3.94	1.66382	1.36457	1.57793	1.65505	1.73231	1.53988	0.171062	0.336246	0.324833
		3.94333	1.66341	1.36341	1.57774	1.65708	1.7303	1.54005	0.17156	0.335567	0.325016
		3.94667	1.66247	1.36237	1.57688	1.65828	1.73116	1.54257	0.172237	0.336305	0.325818
		3.95	1.66403	1.36223	1.5791	1.65791	1.72675	1.54071	0.172989	0.336351	0.327159
		3.95333	1.66549	1.36145	1.5781	1.65882	1.7278	1.54064	0.173323	0.337539	0.326074
		3.95667	1.6667	1.36181	1.58075	1.65696	1.72892	1.54063	0.174269	0.337509	0.325466
		3.96	1.66772	1.36196	1.58004	1.65514	1.72835	1.54103	0.174145	0.337628	0.325013
		3.96333	1.66895	1.36389	1.58054	1.65421	1.72811	1.54078	0.173251	0.338861	0.325324
		3.96667	1.66838	1.3643	1.58024	1.6546	1.73034	1.54221	0.173606	0.339116	0.324187
		3.97	1.66703	1.36425	1.58081	1.65393	1.73128	1.54276	0.173343	0.336196	0.325121
		3.97333	1.66662	1.36498	1.57881	1.65514	1.7328	1.5419	0.17309	0.336881	0.325542
		3.97667	1.66469	1.36596	1.57946	1.6551	1.73388	1.54196	0.172635	0.337928	0.327575
		3.98	1.66445	1.36584	1.57999	1.65271	1.73412	1.53975	0.174392	0.335927	0.326344
		3.98333	1.66626	1.36783	1.58192	1.65219	1.73315	1.54052	0.172564	0.336191	0.328033
		3.98667	1.66767	1.36818	1.58316	1.65069	1.73252	1.53941	0.173089	0.338462	0.328647
		3.99	1.6684	1.36856	1.58409	1.64896	1.73268	1.5386	0.172496	0.339641	0.328556
		3.99333	1.67093	1.36863	1.58298	1.64831	1.73212	1.53879	0.174704	0.338686	0.328714
		3.99667	1.67087	1.36846	1.58291	1.6486	1.73112	1.53959	0.173773	0.338825	0.329391
		4	1.66852	1.36631	1.58159	1.64724	1.73127	1.53806	0.174452	0.34019	0.327488
		4.00333	1.66956	1.36547	1.58058	1.64972	1.73071	1.53785	0.174235	0.339823	0.32591
		4.00667	1.67019	1.36642	1.58066	1.64585	1.72964	1.54032	0.174334	0.338711	0.326393
		4.01	1.66864	1.36657	1.58176	1.64675	1.72933	1.5392	0.17314	0.337191	0.327078
		4.01333	1.6696	1.36659	1.58185	1.64772	1.72932	1.54073	0.174341	0.338568	0.328068
		4.01667	1.6707	1.36608	1.58214	1.64931	1.73145	1.54347	0.174708	0.337161	0.327517
		4.02	1.66994	1.3667	1.58199	1.64736	1.73157	1.5446	0.17445	0.337267	0.329601
		4.02333	1.66866	1.36382	1.5819	1.65241	1.73102	1.54423	0.174719	0.337603	0.330182
		4.02667	1.66876	1.36327	1.5817	1.65093	1.73103	1.54554	0.174279	0.34047	0.329395
		4.03	1.66823	1.36181	1.58166	1.65196	1.73207	1.54422	0.172712	0.339551	0.32944
		4.03333	1.66799	1.36198	1.58127	1.65262	1.73123	1.5424	0.17314	0.339422	0.330977
		4.03667	1.66781	1.36168	1.58227	1.65187	1.73007	1.5425	0.17338	0.338329	0.330124
		4.04	1.67006	1.36505	1.58179	1.65271	1.72903	1.54123	0.173061	0.338355	0.329373
		4.04333	1.67037	1.36598	1.58327	1.6549	1.73078	1.54069	0.172605	0.336616	0.32783
		4.04667	1.67135	1.36709	1.58305	1.65287	1.73047	1.54148	0.172799	0.336074	0.326062
		4.05	1.67249	1.36827	1.58304	1.65193	1.73052	1.53886	0.172987	0.337021	0.324197
		4.05333	1.67204	1.36854	1.5831	1.6559	1.72988	1.53808	0.172127	0.33847	0.324117
		4.05667	1.67134	1.3663	1.58342	1.65858	1.73249	1.53901	0.172183	0.338425	0.32474
		4.06	1.67261	1.3662	1.58285	1.65733	1.73145	1.53833	0.172685	0.338597	0.32606
		4.06333	1.67159	1.36635	1.58246	1.65648	1.73293	1.53836	0.172435	0.339176	0.325351
		4.06667	1.67069	1.3665	1.58351	1.6594	1.73142	1.54076	0.171817	0.339514	0.326806
		4.07	1.67162	1.36739	1.58236	1.65533	1.73198	1.54126	0.173127	0.338833	0.327982
		4.07333	1.67083	1.36979	1.58232	1.65304	1.73208	1.54201	0.173054	0.33888	0.327718
		4.07667	1.67031	1.3701	1.5823	1.65393	1.73134	1.54384	0.17317	0.34074	0.327186
		4.08	1.671	1.36988	1.58324	1.65788	1.73169	1.54394	0.173516	0.341252	0.330395
		4.08333	1.67039	1.37017	1.58348	1.65334	1.73302	1.54281	0.173295	0.340691	0.329845
		4.08667	1.67086	1.37024	1.58522	1.65271	1.73293	1.54274	0.173264	0.340024	0.328799
		4.09	1.67156	1.36878	1.58533	1.64919	1.73301	1.54174	0.173512	0.33835	0.327901
		4.09333	1.67288	1.36931	1.58582	1.64869	1.7321	1.54305	0.173288	0.336711	0.327692
		4.09667	1.67338	1.37011	1.58569	1.64705	1.73045	1.54426	0.172367	0.335878	0.32662
		4.1	1.6743	1.37	1.58522	1.64896	1.73021	1.5439	0.171975	0.334418	0.326174
		4.10333	1.67386	1.3695	1.58504	1.65041	1.7303	1.54384	0.171491	0.335126	0.326367
		4.10667	1.67292	1.37	1.58574	1.65092	1.72963	1.54359	0.17221	0.337551	0.326194
		4.11	1.66966	1.36986	1.58465	1.65432	1.72989	1.54042	0.172955	0.337511	0.327497
		4.11333	1.66941	1.36978	1.58588	1.65757	1.73011	1.53885	0.172772	0.338266	0.328371
		4.11667	1.66926	1.37057	1.58553	1.658	1.7301	1.54157	0.173697	0.338221	0.329297
		4.12	1.66891	1.37016	1.58414	1.65829	1.73071	1.5406	0.174137	0.338954	0.330105
		4.12333	1.66994	1.36999	1.584	1.66078	1.73122	1.5417	0.172405	0.339032	0.331893
		4.12667	1.67189	1.36793	1.58382	1.6589	1.73321	1.54253	0.17277	0.339068	0.330906
		4.13	1.67274	1.36983	1.58326	1.6563	1.7329	1.54455	0.17307	0.338596	0.330075
		4.13333	1.67417	1.36936	1.5847	1.6596	1.7342	1.54381	0.173521	0.340383	0.328803
		4.13667	1.67457	1.37061	1.58537	1.66147	1.73432	1.54384	0.172469	0.33901	0.329889
		4.14	1.6754	1.37012	1.58477	1.65929	1.73347	1.54208	0.173797	0.338073	0.329448
		4.14333	1.67628	1.37248	1.5855	1.658	1.73255	1.54086	0.171843	0.337946	0.330504
		4.14667	1.67631	1.37106	1.5845	1.66017	1.7318	1.53895	0.1713	0.33676	0.330678
		4.15	1.67387	1.37162	1.58381	1.65416	1.73433	1.53792	0.171164	0.336239	0.332278
		4.15333	1.67403	1.37251	1.58512	1.65171	1.7319	1.54024	0.171845	0.336923	0.331476
		4.15667	1.67321	1.37335	1.58603	1.65382	1.73266	1.54032	0.171577	0.337707	0.330989
		4.16	1.67277	1.37305	1.58611	1.65307	1.73426	1.54057	0.173462	0.337618	0.331978
		4.16333	1.67322	1.37363	1.58732	1.65043	1.73591	1.54047	0.176434	0.338655	0.332778
		4.16667	1.67552	1.37309	1.58691	1.65189	1.73128	1.54162	0.175334	0.33936	0.333652
		4.17	1.67589	1.37187	1.58664	1.65117	1.73308	1.54025	0.174917	0.338822	0.334169
		4.17333	1.67514	1.37179	1.58666	1.65196	1.73286	1.5415	0.174718	0.337579	0.33375
		4.17667	1.67431	1.37332	1.58716	1.65582	1.7311	1.54298	0.173669	0.33839	0.332547
		4.18	1.67383	1.37286	1.5874	1.65661	1.73087	1.54479	0.171926	0.339356	0.332694
		4.18333	1.6732	1.37269	1.58729	1.65623	1.73075	1.54441	0.172285	0.338	0.33157
		4.18667	1.67254	1.37329	1.58693	1.65884	1.73248	1.54557	0.173347	0.339569	0.331367
		4.19	1.67444	1.37259	1.58703	1.65762	1.73261	1.54527	0.172678	0.340116	0.332632
		4.19333	1.6757	1.37062	1.58726	1.65498	1.73385	1.54475	0.173664	0.338559	0.33211
		4.19667	1.67592	1.37106	1.58626	1.65672	1.7349	1.54533	0.175383	0.33929	0.330834
		4.2	1.67657	1.37196	1.5865	1.65836	1.7349	1.54523	0.174708	0.339521	0.330556
		4.20333	1.67745	1.37349	1.5876	1.66176	1.73357	1.54549	0.173719	0.33973	0.329447
		4.20667	1.67696	1.37463	1.58653	1.66533	1.73327	1.54688	0.175901	0.340364	0.327635
		4.21	1.67751	1.37454	1.58638	1.66591	1.73204	1.54696	0.175384	0.341805	0.327311
		4.21333	1.67729	1.37502	1.58678	1.66161	1.73088	1.5453	0.17345	0.340201	0.326959
		4.21667	1.67735	1.37386	1.58743	1.66514	1.73181	1.54537	0.174471	0.339657	0.329101
		4.22	1.67607	1.37159	1.58619	1.66089	1.73252	1.54438	0.175837	0.33862	0.329181
		4.22333	1.67649	1.37141	1.58688	1.65892	1.73374	1.54533	0.175771	0.338316	0.331304
		4.22667	1.67581	1.37238	1.58673	1.65862	1.73416	1.54675	0.173091	0.339181	0.331271
		4.23	1.67637	1.37109	1.58724	1.66507	1.73814	1.54787	0.17388	0.338922	0.331109
		4.23333	1.67669	1.37205	1.58734	1.66233	1.73871	1.54944	0.174031	0.339182	0.329856
		4.23667	1.67878	1.37204	1.58867	1.65989	1.73742	1.55066	0.173498	0.339518	0.328889
		4.24	1.67688	1.37205	1.58883	1.65596	1.74122	1.54989	0.171625	0.339117	0.32815
		4.24333	1.67749	1.3726	1.58904	1.65481	1.7391	1.54842	0.173253	0.337781	0.32911
		4.24667	1.67703	1.37387	1.58946	1.65292	1.73654	1.54924	0.174741	0.337712	0.329609
		4.25	1.67715	1.37424	1.58868	1.65243	1.73462	1.54926	0.175478	0.337557	0.329391
		4.25333	1.67681	1.3752	1.58878	1.65694	1.73537	1.54806	0.175913	0.337421	0.330711
		4.25667	1.67799	1.37517	1.59016	1.66154	1.73098	1.54711	0.176567	0.337378	0.330351
		4.26	1.67798	1.37573	1.5899	1.66213	1.73385	1.54827	0.177339	0.337541	0.330902
		4.26333	1.67894	1.37465	1.58899	1.66334	1.73344	1.5476	0.17455	0.340013	0.331362
		4.26667	1.6774	1.37437	1.58942	1.66199	1.73634	1.54705	0.175249	0.341131	0.332118
		4.27	1.67664	1.37498	1.58746	1.65736	1.7366	1.54786	0.174397	0.340398	0.333713
		4.27333	1.67559	1.37677	1.5871	1.65502	1.73561	1.54888	0.176012	0.340128	0.332985
		4.27667	1.67506	1.37622	1.58812	1.65452	1.73415	1.54966	0.175413	0.340253	0.333144
		4.28	1.67412	1.37655	1.58964	1.64888	1.73349	1.55096	0.177124	0.337781	0.332398
		4.28333	1.67514	1.37712	1.59034	1.65088	1.73211	1.55112	0.176033	0.337421	0.333129
		4.28667	1.6755	1.37638	1.59103	1.65006	1.73244	1.55096	0.17545	0.337765	0.331143
		4.29	1.67753	1.3758	1.59123	1.64966	1.73401	1.54902	0.174208	0.339852	0.33166
		4.29333	1.67728	1.37569	1.5909	1.64908	1.73562	1.5495	0.175315	0.339362	0.329746
		4.29667	1.67781	1.37635	1.58903	1.65346	1.73528	1.5493	0.174876	0.339792	0.331026
		4.3	1.67755	1.3772	1.58892	1.65444	1.73419	1.54908	0.173775	0.33968	0.328401
		4.30333	1.67594	1.3797	1.59079	1.65634	1.73291	1.5481	0.175618	0.33844	0.326985
		4.30667	1.6756	1.37817	1.59088	1.65742	1.73185	1.55	0.176284	0.337345	0.327558
		4.31	1.67834	1.37818	1.59172	1.65937	1.73174	1.54976	0.17571	0.336815	0.327582
		4.31333	1.67828	1.37694	1.59173	1.65857	1.73125	1.54909	0.175407	0.336725	0.326845
		4.31667	1.67642	1.37639	1.59334	1.65852	1.73315	1.54927	0.175798	0.336816	0.328774
		4.32	1.67959	1.37473	1.59214	1.66232	1.73569	1.55129	0.173371	0.337477	0.331648
		4.32333	1.68083	1.3767	1.59176	1.66388	1.73773	1.55156	0.173964	0.338184	0.331356
		4.32667	1.67841	1.37769	1.59108	1.6644	1.73649	1.55214	0.172641	0.337848	0.331754
		4.33	1.6796	1.37876	1.59069	1.66346	1.73815	1.55304	0.172435	0.336956	0.333949
		4.33333	1.68081	1.37927	1.58815	1.662	1.73623	1.55339	0.173295	0.336244	0.332579
		4.33667	1.6793	1.37933	1.58867	1.65946	1.73494	1.5537	0.175215	0.336055	0.33245
		4.34	1.67812	1.37779	1.59012	1.6577	1.73348	1.55459	0.1747	0.334776	0.332065
		4.34333	1.67841	1.37644	1.58977	1.65781	1.73384	1.55429	0.177609	0.335527	0.333223
		4.34667	1.67738	1.37806	1.59087	1.65964	1.73366	1.55409	0.178555	0.336575	0.330442
		4.35	1.6785	1.3774	1.59079	1.66192	1.73817	1.5543	0.178651	0.336783	0.331977
		4.35333	1.67906	1.37728	1.59247	1.66415	1.73885	1.55458	0.1772	0.337703	0.331366
		4.35667	1.67866	1.37841	1.59119	1.66434	1.73941	1.55467	0.175997	0.338355	0.332038
		4.36	1.67932	1.37865	1.59184	1.66133	1.73947	1.5545	0.174396	0.338245	0.331799
		4.36333	1.68015	1.37707	1.5918	1.66001	1.73921	1.556	0.174308	0.338151	0.331613
		4.36667	1.6821	1.37851	1.59228	1.65568	1.73737	1.55638	0.174592	0.338374	0.330266
		4.37	1.68099	1.37907	1.59113	1.65148	1.73442	1.55516	0.175108	0.338755	0.328927
		4.37333	1.68176	1.37783	1.59119	1.65142	1.73475	1.55426	0.176132	0.338052	0.32931
		4.37667	1.68136	1.37815	1.5904	1.65596	1.73489	1.55278	0.176328	0.337495	0.328376
		4.38	1.68078	1.37943	1.59178	1.65719	1.73455	1.5504	0.17552	0.336741	0.330523
		4.38333	1.67908	1.37839	1.59311	1.66276	1.73514	1.54872	0.174712	0.336182	0.33173
		4.38667	1.68023	1.37836	1.59365	1.66699	1.73855	1.5493	0.175274	0.335478	0.332423
		4.39	1.67998	1.37989	1.59435	1.6686	1.73616	1.54812	0.174917	0.334676	0.331657
		4.39333	1.6799	1.37999	1.59457	1.66797	1.73683	1.54877	0.175436	0.336736	0.331838
		4.39667	1.68043	1.37862	1.59286	1.66694	1.73703	1.54804	0.175945	0.33754	0.331662
		4.4	1.68086	1.37905	1.59257	1.66326	1.73476	1.55024	0.17679	0.337537	0.331384
		4.40333	1.67936	1.37838	1.59183	1.66166	1.73463	1.55127	0.175415	0.336843	0.331457
		4.40667	1.68015	1.37909	1.59261	1.66016	1.73713	1.55257	0.175723	0.3373	0.330336
		4.41	1.6804	1.37822	1.59363	1.6601	1.73781	1.55294	0.174797	0.33591	0.330256
		4.41333	1.67953	1.37878	1.59452	1.66158	1.73763	1.55448	0.175724	0.336443	0.330172
		4.41667	1.67973	1.37996	1.59416	1.66363	1.73888	1.55453	0.175197	0.336582	0.329776
		4.42	1.68171	1.38145	1.59401	1.66419	1.73726	1.55425	0.176244	0.337085	0.331076
		4.42333	1.68106	1.37971	1.59193	1.66569	1.7368	1.55539	0.176637	0.336946	0.332193
		4.42667	1.68109	1.37904	1.59099	1.66491	1.73654	1.5545	0.177284	0.338829	0.332035
		4.43	1.68146	1.37919	1.59074	1.66231	1.73954	1.55474	0.176837	0.337777	0.33096
		4.43333	1.68033	1.37834	1.59087	1.66071	1.73955	1.55234	0.175827	0.338125	0.331335
		4.43667	1.67994	1.37787	1.59099	1.66095	1.73981	1.55402	0.175968	0.339461	0.329865
		4.44	1.67911	1.37951	1.59205	1.65979	1.73802	1.55375	0.175395	0.339439	0.330097
		4.44333	1.67914	1.38172	1.59266	1.65778	1.73807	1.55501	0.176554	0.337697	0.330337
		4.44667	1.68045	1.38195	1.59362	1.65614	1.73521	1.55463	0.175431	0.338543	0.330307
		4.45	1.68066	1.38191	1.59368	1.65835	1.7362	1.55683	0.177261	0.338601	0.329923
		4.45333	1.67999	1.38175	1.59387	1.65935	1.73701	1.55508	0.176009	0.337371	0.329886
		4.45667	1.68088	1.38001	1.59331	1.66308	1.73829	1.55582	0.176166	0.337604	0.328599
		4.46	1.68122	1.37998	1.5926	1.66517	1.73754	1.55608	0.175661	0.338763	0.328811
		4.46333	1.68126	1.37946	1.59218	1.66976	1.73849	1.5574	0.175541	0.338251	0.330199
		4.46667	1.68099	1.38037	1.59199	1.66732	1.73831	1.55836	0.1756	0.339315	0.328681
		4.47	1.68178	1.38055	1.59207	1.66539	1.73783	1.55865	0.176703	0.339037	0.328483
		4.47333	1.68181	1.38221	1.59269	1.66192	1.73894	1.55885	0.177051	0.33945	0.330068
		4.47667	1.68108	1.38319	1.59338	1.66083	1.73747	1.56014	0.176253	0.338665	0.330523
		4.48	1.67982	1.38377	1.5941	1.65757	1.73713	1.55903	0.177958	0.338377	0.330478
		4.48333	1.68074	1.38308	1.59407	1.65794	1.73687	1.55865	0.177926	0.337072	0.331052
		4.48667	1.68066	1.38386	1.59282	1.65827	1.7367	1.5578	0.177742	0.33826	0.329709
		4.49	1.68108	1.38353	1.59252	1.65647	1.73676	1.55661	0.177898	0.338975	0.32853
		4.49333	1.68139	1.38363	1.59281	1.65568	1.73981	1.55635	0.179551	0.338217	0.32698
		4.49667	1.68264	1.38305	1.59204	1.6584	1.74005	1.55768	0.178359	0.338022	0.325988
		4.5	1.68225	1.38281	1.59164	1.65944	1.73769	1.55806	0.178192	0.338286	0.326695
		4.50333	1.68179	1.38228	1.59398	1.65787	1.74058	1.55684	0.179143	0.338471	0.328266
		4.50667	1.68236	1.38352	1.59392	1.65892	1.74235	1.55738	0.179338	0.33587	0.327701
		4.51	1.68213	1.38193	1.59351	1.66044	1.74135	1.55829	0.17844	0.336989	0.326334
		4.51333	1.68102	1.38247	1.59462	1.65727	1.7432	1.55745	0.178673	0.337632	0.32534
		4.51667	1.68128	1.38325	1.59499	1.65815	1.74697	1.55783	0.178331	0.338658	0.324887
		4.52	1.68172	1.38313	1.59397	1.65896	1.74075	1.55984	0.177722	0.338258	0.323152
		4.52333	1.68067	1.38239	1.59347	1.65892	1.73971	1.56019	0.177448	0.339482	0.324169
		4.52667	1.68203	1.38484	1.59395	1.65951	1.74014	1.55833	0.177095	0.338502	0.327553
		4.53	1.68318	1.38575	1.59293	1.66365	1.73809	1.55833	0.178303	0.337557	0.328338
		4.53333	1.68488	1.38476	1.59314	1.6621	1.73618	1.55569	0.176758	0.337221	0.32927
		4.53667	1.68571	1.38468	1.59352	1.66461	1.74172	1.55524	0.175392	0.335326	0.330754
		4.54	1.6859	1.38405	1.59469	1.66532	1.73908	1.55526	0.175825	0.336243	0.330354
		4.54333	1.68508	1.38203	1.59458	1.66631	1.73788	1.55474	0.175266	0.337261	0.328787
		4.54667	1.68349	1.38131	1.5944	1.66358	1.7391	1.55632	0.175003	0.337636	0.328039
		4.55	1.68384	1.38192	1.59395	1.66603	1.73948	1.55777	0.176325	0.33734	0.326621
		4.55333	1.68206	1.38263	1.59419	1.665	1.73786	1.55849	0.177428	0.3392	0.326817
		4.55667	1.68258	1.38354	1.59288	1.66493	1.73963	1.55851	0.177747	0.338811	0.328675
		4.56	1.68354	1.38358	1.59285	1.66375	1.74064	1.55849	0.177826	0.338936	0.328888
		4.56333	1.68441	1.38262	1.59313	1.66659	1.74227	1.55768	0.176275	0.340015	0.3292
		4.56667	1.68248	1.38171	1.59449	1.6673	1.74141	1.55702	0.176176	0.33896	0.329424
		4.57	1.68404	1.38249	1.59407	1.66423	1.7427	1.5583	0.176685	0.33822	0.328293
		4.57333	1.68367	1.38176	1.59569	1.66208	1.74267	1.55763	0.176063	0.337647	0.327279
		4.57667	1.68242	1.38272	1.59534	1.6648	1.74065	1.55914	0.176818	0.336445	0.32653
		4.58	1.68134	1.38373	1.59547	1.66341	1.73912	1.557	0.177493	0.335429	0.326549
		4.58333	1.68184	1.38468	1.59579	1.66617	1.73882	1.55694	0.177633	0.334839	0.326028
		4.58667	1.68263	1.38425	1.59518	1.66938	1.73725	1.55651	0.176876	0.334906	0.327226
		4.59	1.68434	1.38521	1.59424	1.67094	1.73582	1.55612	0.175941	0.334951	0.327306
		4.59333	1.68459	1.3865	1.59412	1.66295	1.73717	1.55469	0.176307	0.335053	0.328581
		4.59667	1.68591	1.38669	1.59432	1.66445	1.73518	1.55559	0.177339	0.335844	0.328273
		4.6	1.68708	1.38609	1.59266	1.65947	1.73512	1.55566	0.177283	0.336167	0.330249
		4.60333	1.68463	1.38553	1.59401	1.65936	1.73522	1.55308	0.177456	0.335705	0.329878
		4.60667	1.68353	1.38618	1.59429	1.65914	1.73632	1.55419	0.177974	0.336877	0.330262
		4.61	1.68489	1.38436	1.59477	1.66517	1.73461	1.55522	0.176097	0.337947	0.33086
		4.61333	1.6864	1.38479	1.5948	1.66177	1.73576	1.55493	0.176513	0.337862	0.330579
		4.61667	1.68517	1.38514	1.59566	1.66196	1.73754	1.55611	0.176995	0.33874	0.329713
		4.62	1.68741	1.38577	1.59384	1.664	1.73813	1.55763	0.178136	0.337967	0.328838
		4.62333	1.68826	1.3855	1.59346	1.66522	1.73883	1.55753	0.178227	0.337714	0.327605
		4.62667	1.68872	1.38644	1.5944	1.66469	1.74018	1.55648	0.178677	0.33682	0.327259
		4.63	1.6881	1.38689	1.59503	1.66789	1.73787	1.55728	0.177255	0.336107	0.327997
		4.63333	1.6881	1.38748	1.5947	1.66767	1.73737	1.55652	0.177108	0.337417	0.326609
		4.63667	1.68788	1.38712	1.5963	1.66579	1.73708	1.5581	0.175715	0.33845	0.328469
		4.64	1.68818	1.38768	1.59577	1.66653	1.73561	1.55749	0.175492	0.338409	0.327485
		4.64333	1.68727	1.38724	1.59625	1.6654	1.73627	1.55773	0.175111	0.3383	0.327025
		4.64667	1.68515	1.38639	1.59586	1.66744	1.73803	1.55723	0.175792	0.338537	0.326497
		4.65	1.68564	1.3874	1.59594	1.66994	1.73914	1.55673	0.173901	0.336782	0.327638
		4.65333	1.68641	1.38845	1.59532	1.66937	1.73793	1.55584	0.175404	0.338697	0.326933
		4.65667	1.68652	1.38724	1.59651	1.66701	1.7389	1.55648	0.17611	0.33703	0.327864
		4.66	1.68792	1.38696	1.59559	1.66703	1.73989	1.55735	0.177971	0.337651	0.328512
		4.66333	1.6903	1.38793	1.59571	1.66726	1.73965	1.5579	0.177474	0.336955	0.32909
		4.66667	1.68929	1.3866	1.59536	1.66554	1.73636	1.56063	0.178685	0.336611	0.329712
		4.67	1.68719	1.38626	1.5959	1.66299	1.73883	1.56133	0.177443	0.334771	0.330058
		4.67333	1.68786	1.38614	1.59581	1.66438	1.74089	1.56241	0.17694	0.335888	0.33071
		4.67667	1.6859	1.3869	1.59582	1.6668	1.73994	1.56268	0.176408	0.335572	0.329345
		4.68	1.68596	1.38682	1.59614	1.66597	1.73988	1.56397	0.174774	0.336768	0.328827
		4.68333	1.68679	1.38731	1.59706	1.66738	1.74344	1.5607	0.176135	0.338044	0.328923
		4.68667	1.68807	1.3877	1.59752	1.66736	1.74232	1.56121	0.175518	0.338697	0.32804
		4.69	1.68655	1.3868	1.59866	1.66811	1.73913	1.56036	0.174068	0.338414	0.328041
		4.69333	1.6874	1.38655	1.59798	1.66734	1.73932	1.56034	0.174684	0.338657	0.328072
		4.69667	1.68593	1.38664	1.59776	1.66474	1.73988	1.55842	0.177825	0.33849	0.328858
		4.7	1.68503	1.38696	1.59803	1.66064	1.73914	1.55953	0.177732	0.338705	0.327489
		4.70333	1.68464	1.3864	1.59746	1.66235	1.73798	1.55742	0.178626	0.338439	0.328246
		4.70667	1.68374	1.38712	1.59619	1.66023	1.73854	1.55708	0.18211	0.338793	0.328399
		4.71	1.68304	1.38764	1.59714	1.65962	1.73841	1.55726	0.180441	0.338555	0.329086
		4.71333	1.68454	1.38827	1.59725	1.65925	1.73893	1.55867	0.178289	0.337127	0.328945
		4.71667	1.68581	1.38837	1.59665	1.66168	1.73748	1.56055	0.176933	0.337256	0.329089
		4.72	1.68723	1.38759	1.59765	1.66145	1.73964	1.56293	0.177625	0.337007	0.328429
		4.72333	1.68896	1.38812	1.59844	1.66355	1.74036	1.56412	0.175512	0.336643	0.328354
		4.72667	1.69041	1.38825	1.59825	1.6643	1.73975	1.56462	0.177574	0.337593	0.328323
		4.73	1.6887	1.38916	1.59785	1.66561	1.74088	1.56476	0.178059	0.338822	0.327501
		4.73333	1.6892	1.38973	1.59924	1.66555	1.74182	1.56509	0.178073	0.338931	0.328593
		4.73667	1.68801	1.39083	1.59906	1.66934	1.74383	1.56496	0.177432	0.338852	0.32897
		4.74	1.68771	1.39086	1.59866	1.66594	1.74567	1.5653	0.177253	0.339904	0.326659
		4.74333	1.68695	1.39037	1.59796	1.66465	1.74592	1.56568	0.177551	0.340403	0.326302
		4.74667	1.68952	1.38983	1.59825	1.66172	1.74375	1.56574	0.1774	0.340941	0.32807
		4.75	1.68791	1.3897	1.59585	1.66199	1.74347	1.56464	0.177469	0.341309	0.329175
		4.75333	1.68766	1.39005	1.5962	1.66209	1.7415	1.56438	0.178022	0.34042	0.328529
		4.75667	1.68737	1.38993	1.5961	1.66654	1.73935	1.5642	0.178159	0.34074	0.331763
		4.76	1.68697	1.39165	1.5968	1.66639	1.73833	1.5644	0.176697	0.340564	0.331873
		4.76333	1.68585	1.39054	1.59714	1.66916	1.74019	1.56442	0.176894	0.33886	0.331118
		4.76667	1.68716	1.3904	1.5994	1.66737	1.74272	1.56593	0.177769	0.337917	0.329167
		4.77	1.68726	1.39008	1.59734	1.66604	1.7432	1.56636	0.176901	0.339116	0.3292
		4.77333	1.68685	1.39059	1.59752	1.66436	1.7439	1.56492	0.177755	0.339062	0.327919
		4.77667	1.68814	1.38912	1.59884	1.66679	1.74585	1.56224	0.177707	0.336929	0.328506
		4.78	1.68834	1.38966	1.59857	1.66832	1.74595	1.56308	0.178205	0.339089	0.328225
		4.78333	1.68821	1.38931	1.59792	1.67347	1.74559	1.56036	0.178437	0.337988	0.328265
		4.78667	1.68823	1.39058	1.59946	1.67403	1.74633	1.55882	0.178093	0.337775	0.329206
		4.79	1.68885	1.39093	1.59879	1.67651	1.74693	1.55937	0.176197	0.336549	0.330357
		4.79333	1.6873	1.3915	1.59791	1.67473	1.74722	1.56166	0.177157	0.338406	0.32987
		4.79667	1.68746	1.39234	1.59876	1.67356	1.74706	1.56038	0.176381	0.338763	0.330046
		4.8	1.6867	1.39342	1.60007	1.6664	1.74657	1.56237	0.176473	0.340387	0.329001
		4.80333	1.68637	1.39218	1.599	1.66744	1.74447	1.56276	0.177085	0.339737	0.328437
		4.80667	1.68623	1.39089	1.60048	1.66546	1.7438	1.56291	0.177979	0.339423	0.32657
		4.81	1.68729	1.3894	1.60066	1.66586	1.74288	1.56301	0.177818	0.340032	0.327153
		4.81333	1.68869	1.38833	1.59948	1.66605	1.74185	1.56312	0.178542	0.338398	0.325115
		4.81667	1.69005	1.38719	1.59834	1.66858	1.74084	1.56375	0.177409	0.338527	0.327573
		4.82	1.69047	1.38859	1.60046	1.66566	1.74189	1.56467	0.177231	0.338784	0.327407
		4.82333	1.69057	1.38983	1.59965	1.67039	1.74245	1.56641	0.178832	0.340216	0.328561
		4.82667	1.69155	1.3928	1.59981	1.67201	1.74299	1.56642	0.179542	0.339155	0.328205
		4.83	1.68989	1.39415	1.60005	1.67259	1.74373	1.56803	0.178955	0.338212	0.329528
		4.83333	1.68903	1.39551	1.6001	1.67548	1.74362	1.56864	0.178844	0.337829	0.329761
		4.83667	1.69013	1.39476	1.59837	1.67822	1.74358	1.56817	0.178922	0.337688	0.329492
		4.84	1.69062	1.39473	1.59842	1.67431	1.74126	1.56782	0.177431	0.336641	0.329367
		4.84333	1.68976	1.39264	1.59837	1.67471	1.74111	1.56745	0.176693	0.336357	0.330137
		4.84667	1.68984	1.39279	1.59844	1.67358	1.74033	1.56608	0.176485	0.337832	0.331578
		4.85	1.69055	1.39275	1.59747	1.6736	1.74041	1.56438	0.17777	0.337084	0.331482
		4.85333	1.69056	1.39247	1.59775	1.67318	1.73964	1.56362	0.178475	0.339552	0.331245
		4.85667	1.68938	1.39252	1.59827	1.67381	1.74097	1.56408	0.177643	0.340633	0.330871
		4.86	1.68894	1.39447	1.59807	1.67322	1.74156	1.56308	0.178017	0.341358	0.330742
		4.86333	1.689	1.39371	1.598	1.67138	1.74233	1.56251	0.17822	0.340692	0.331122
		4.86667	1.6877	1.39434	1.5988	1.67047	1.74328	1.56316	0.179854	0.341275	0.328831
		4.87	1.6876	1.39485	1.5992	1.67109	1.74489	1.56321	0.17798	0.340615	0.330501
		4.87333	1.68909	1.3949	1.59938	1.67195	1.74646	1.56197	0.179503	0.338479	0.330199
		4.87667	1.6897	1.3939	1.59905	1.66888	1.74745	1.56392	0.17879	0.337683	0.328278
		4.88	1.68907	1.39327	1.60119	1.67022	1.74881	1.56522	0.178929	0.337236	0.327724
		4.88333	1.68965	1.39255	1.6006	1.6699	1.74928	1.56431	0.177379	0.338021	0.329094
		4.88667	1.68951	1.39234	1.60088	1.66658	1.74511	1.56523	0.17867	0.335353	0.328516
		4.89	1.6884	1.39264	1.60026	1.66518	1.74328	1.56608	0.176416	0.337742	0.328382
		4.89333	1.68772	1.39256	1.60065	1.66447	1.74191	1.56602	0.17603	0.338091	0.328929
		4.89667	1.68918	1.39411	1.59887	1.66657	1.74085	1.56767	0.175972	0.338634	0.32956
		4.9	1.69047	1.39499	1.60021	1.66835	1.73839	1.56831	0.17535	0.337712	0.329855
		4.90333	1.69039	1.397	1.60069	1.67182	1.74061	1.56964	0.175584	0.338984	0.32956
		4.90667	1.69049	1.39542	1.60091	1.67458	1.74147	1.56858	0.178568	0.339212	0.330274
		4.91	1.69075	1.39644	1.60114	1.6786	1.74197	1.56789	0.17953	0.339496	0.330158
		4.91333	1.69091	1.39639	1.60276	1.67924	1.74295	1.56596	0.180416	0.339002	0.330312
		4.91667	1.68926	1.39582	1.60243	1.67957	1.74393	1.5666	0.179782	0.338888	0.328935
		4.92	1.68963	1.39392	1.60113	1.67968	1.74524	1.56537	0.179906	0.338722	0.328543
		4.92333	1.69173	1.39752	1.60217	1.67923	1.74473	1.56602	0.177639	0.338894	0.32859
		4.92667	1.69315	1.39614	1.60148	1.67914	1.74485	1.56528	0.17705	0.337756	0.330627
		4.93	1.69454	1.39575	1.60062	1.67431	1.74501	1.56527	0.176654	0.338551	0.329064
		4.93333	1.69557	1.39548	1.60117	1.67198	1.74602	1.56292	0.176295	0.339754	0.329346
		4.93667	1.6948	1.39591	1.60185	1.67206	1.74612	1.56299	0.175792	0.338998	0.330846
		4.94	1.693	1.39376	1.60171	1.66858	1.74666	1.5635	0.177447	0.338198	0.329825
		4.94333	1.6918	1.39555	1.60198	1.6666	1.74705	1.56697	0.177496	0.338419	0.33008
		4.94667	1.69004	1.39611	1.60178	1.66988	1.74737	1.5684	0.177626	0.338868	0.327892
		4.95	1.68912	1.39635	1.60132	1.6706	1.74717	1.56957	0.179863	0.33768	0.329723
		4.95333	1.69091	1.39511	1.60195	1.6683	1.74688	1.57013	0.181219	0.340634	0.329453
		4.95667	1.69311	1.39536	1.60222	1.67315	1.74846	1.57032	0.181473	0.338976	0.330456
		4.96	1.69386	1.39472	1.60264	1.67746	1.74883	1.56639	0.180521	0.33913	0.327336
		4.96333	1.69387	1.39341	1.60243	1.67705	1.74694	1.56532	0.179585	0.338754	0.328604
		4.96667	1.69552	1.39245	1.60407	1.67913	1.7462	1.56706	0.179168	0.338949	0.326466
		4.97	1.69465	1.39419	1.60388	1.68346	1.74606	1.56683	0.177842	0.337213	0.326164
		4.97333	1.6922	1.39514	1.6034	1.68067	1.74452	1.56694	0.176705	0.339814	0.323868
		4.97667	1.69181	1.39449	1.60421	1.67809	1.74522	1.56822	0.177511	0.340799	0.325807
		4.98	1.69213	1.39463	1.60448	1.67918	1.74586	1.569	0.178738	0.341909	0.328028
		4.98333	1.69208	1.3953	1.60372	1.67788	1.74783	1.56902	0.176804	0.341318	0.33008
		4.98667	1.69277	1.39521	1.60517	1.6746	1.74794	1.56952	0.177233	0.340835	0.329652
		4.99	1.69317	1.39535	1.60511	1.67478	1.74776	1.5699	0.17764	0.338412	0.332074
		4.99333	1.69397	1.39585	1.60537	1.67587	1.74586	1.57087	0.179247	0.338358	0.333012
		4.99667	1.69417	1.39742	1.6054	1.6727	1.74668	1.57043	0.179264	0.337419	0.332047
		5	1.69332	1.39736	1.60582	1.67239	1.74434	1.57013	0.181788	0.337452	0.331277
		5.00333	1.69404	1.39741	1.60445	1.67256	1.74509	1.57054	0.181536	0.337084	0.331544
		5.00667	1.69502	1.39753	1.60423	1.66873	1.74545	1.56933	0.183012	0.337653	0.331804
		5.01	1.69445	1.3967	1.6044	1.66869	1.74554	1.56904	0.18225	0.336855	0.330495
		5.01333	1.69473	1.39559	1.60345	1.67219	1.74448	1.57125	0.181346	0.33668	0.331216
		5.01667	1.69526	1.39657	1.60383	1.67177	1.74398	1.57097	0.181128	0.336991	0.330702
		5.02	1.69453	1.39536	1.60446	1.67062	1.74247	1.57174	0.182224	0.336618	0.330786
		5.02333	1.69408	1.39437	1.60618	1.6719	1.7416	1.57042	0.181005	0.337498	0.330668
		5.02667	1.69523	1.39658	1.60619	1.67231	1.74076	1.57029	0.181171	0.336724	0.332133
		5.03	1.69611	1.39694	1.60797	1.67073	1.74025	1.56804	0.180572	0.336389	0.3321
		5.03333	1.69677	1.39798	1.6069	1.66863	1.7445	1.56926	0.181128	0.33718	0.332248
		5.03667	1.69758	1.39974	1.60756	1.66642	1.74669	1.56718	0.180248	0.338338	0.33183
		5.04	1.69531	1.39983	1.60597	1.66737	1.74791	1.56955	0.179461	0.338504	0.3313
		5.04333	1.69474	1.39975	1.60521	1.66777	1.75092	1.56891	0.177975	0.340422	0.329429
		5.04667	1.69197	1.39944	1.60566	1.66527	1.75108	1.56926	0.179404	0.340854	0.329311
		5.05	1.69188	1.39901	1.60549	1.66529	1.74769	1.56895	0.177384	0.339094	0.329584
		5.05333	1.69067	1.39825	1.60429	1.66729	1.74638	1.57007	0.176386	0.339878	0.330223
		5.05667	1.69279	1.39902	1.60485	1.66481	1.74525	1.57105	0.177478	0.338684	0.329897
		5.06	1.69339	1.39835	1.604	1.66403	1.74265	1.57241	0.179139	0.337964	0.331619
		5.06333	1.69575	1.3992	1.60173	1.66595	1.74378	1.57301	0.1788	0.338489	0.331713
		5.06667	1.69574	1.39797	1.60263	1.66513	1.74495	1.57151	0.179605	0.339422	0.331664
		5.07	1.69586	1.39849	1.60292	1.66622	1.74513	1.57178	0.180926	0.338837	0.331641
		5.07333	1.69666	1.39875	1.6031	1.67035	1.7461	1.5705	0.182135	0.338673	0.33163
		5.07667	1.69553	1.3981	1.60431	1.66771	1.74802	1.57113	0.182551	0.340557	0.330214
		5.08	1.69476	1.39878	1.60593	1.66943	1.74574	1.57164	0.182588	0.340042	0.330063
		5.08333	1.69414	1.39971	1.60552	1.67295	1.74566	1.57323	0.183196	0.339566	0.330236
		5.08667	1.69477	1.39881	1.6047	1.67122	1.7461	1.57228	0.183935	0.338487	0.328693
		5.09	1.69387	1.39848	1.60381	1.67106	1.74585	1.57186	0.183332	0.338767	0.328681
		5.09333	1.69504	1.39815	1.60613	1.67152	1.74489	1.57245	0.180772	0.337223	0.327645
		5.09667	1.69518	1.3989	1.60747	1.66797	1.7479	1.57046	0.179287	0.338192	0.326762
		5.1	1.69534	1.39919	1.60806	1.66785	1.74664	1.56915	0.179743	0.33851	0.326801
		5.10333	1.69444	1.40079	1.60913	1.66888	1.74695	1.56918	0.17831	0.339667	0.327813
		5.10667	1.69393	1.40091	1.61142	1.66871	1.74764	1.57186	0.179443	0.341178	0.327966
		5.11	1.6933	1.40228	1.60844	1.66899	1.74665	1.57032	0.181364	0.341163	0.329059
		5.11333	1.6926	1.40097	1.60841	1.66845	1.74489	1.57277	0.182523	0.340867	0.330282
		5.11667	1.69395	1.39989	1.60828	1.66933	1.74467	1.57361	0.182115	0.341574	0.33098
		5.12	1.69424	1.39849	1.60883	1.6693	1.74207	1.57406	0.181922	0.341237	0.331503
		5.12333	1.69675	1.39912	1.61003	1.66789	1.74203	1.57168	0.179925	0.339496	0.331857
		5.12667	1.69719	1.39709	1.61044	1.66773	1.74263	1.57239	0.180549	0.338756	0.331352
		5.13	1.69845	1.39841	1.60825	1.67313	1.74183	1.57207	0.181419	0.3372	0.330111
		5.13333	1.69739	1.39952	1.60737	1.67212	1.74248	1.57169	0.18081	0.336849	0.32812
		5.13667	1.69772	1.39926	1.60773	1.6732	1.74395	1.57205	0.182378	0.337571	0.328154
		5.14	1.69641	1.39939	1.60593	1.67457	1.74291	1.56966	0.184765	0.338883	0.327669
		5.14333	1.696	1.40185	1.60517	1.67298	1.74286	1.56979	0.183028	0.337502	0.329152
		5.14667	1.69481	1.40033	1.60521	1.67251	1.74283	1.56862	0.183317	0.339038	0.328934
		5.15	1.6944	1.40009	1.60645	1.67124	1.74172	1.56715	0.183476	0.338674	0.329891
		5.15333	1.6944	1.402	1.60673	1.66839	1.74005	1.56669	0.182964	0.33866	0.329899
		5.15667	1.69524	1.40266	1.60657	1.66715	1.74128	1.5685	0.180814	0.338502	0.330549
		5.16	1.69554	1.40144	1.60817	1.6715	1.74118	1.56767	0.182032	0.339392	0.330211
		5.16333	1.69696	1.40215	1.60894	1.66885	1.7435	1.56696	0.181941	0.340125	0.330714
		5.16667	1.69783	1.40263	1.60968	1.66844	1.74525	1.56951	0.182207	0.34067	0.330146
		5.17	1.69891	1.401	1.60854	1.6729	1.74615	1.57015	0.181712	0.340301	0.328878
		5.17333	1.6982	1.40045	1.60784	1.67157	1.74547	1.57106	0.184421	0.338684	0.329069
		5.17667	1.69834	1.40105	1.60744	1.67206	1.74588	1.57164	0.182364	0.339815	0.329005
		5.18	1.69708	1.39992	1.60777	1.67349	1.74485	1.57331	0.182208	0.338849	0.329445
		5.18333	1.6969	1.39923	1.60717	1.67756	1.74393	1.57283	0.183412	0.338525	0.330698
		5.18667	1.69617	1.40123	1.6071	1.67665	1.74383	1.57377	0.182444	0.337851	0.330933
		5.19	1.69499	1.4011	1.60717	1.68082	1.74259	1.5742	0.179492	0.338142	0.330572
		5.19333	1.69605	1.40123	1.60748	1.68088	1.74185	1.57412	0.181203	0.336611	0.328851
		5.19667	1.69646	1.40242	1.60741	1.68311	1.74222	1.57482	0.179088	0.337482	0.329322
		5.2	1.69669	1.40348	1.60728	1.6821	1.74266	1.57416	0.177138	0.336883	0.327196
		5.20333	1.696	1.40357	1.60806	1.68296	1.74447	1.57466	0.178941	0.337441	0.328323
		5.20667	1.69712	1.4031	1.60896	1.68289	1.74613	1.57444	0.179502	0.338559	0.329239
		5.21	1.69586	1.40282	1.60859	1.68059	1.74737	1.57439	0.17864	0.34083	0.32988
		5.21333	1.69652	1.40236	1.60812	1.67937	1.74601	1.57386	0.180674	0.339684	0.32819
		5.21667	1.69628	1.40199	1.60768	1.67772	1.7467	1.57435	0.182555	0.340304	0.328404
		5.22	1.69708	1.40124	1.60763	1.67784	1.74687	1.57237	0.181156	0.340646	0.328537
		5.22333	1.6974	1.4018	1.60714	1.67533	1.74692	1.5737	0.182508	0.339743	0.327063
		5.22667	1.69839	1.40224	1.60767	1.67733	1.74759	1.57309	0.182989	0.337911	0.32791
		5.23	1.69795	1.40242	1.60895	1.67907	1.75018	1.57308	0.181633	0.337887	0.329565
		5.23333	1.69848	1.40231	1.60864	1.6817	1.74974	1.57383	0.181539	0.337559	0.330633
		5.23667	1.69882	1.40236	1.60996	1.68197	1.75088	1.57486	0.180792	0.337415	0.330638
		5.24	1.69797	1.40268	1.61024	1.68455	1.75077	1.57461	0.180298	0.336921	0.330717
		5.24333	1.6976	1.40245	1.61056	1.68385	1.74985	1.57604	0.180996	0.337772	0.331141
		5.24667	1.69764	1.40339	1.6111	1.68149	1.74639	1.57596	0.180816	0.338316	0.330427
		5.25	1.69788	1.40423	1.61196	1.67904	1.74454	1.57635	0.179555	0.338112	0.331331
		5.25333	1.69867	1.40484	1.61038	1.67721	1.74274	1.57585	0.181424	0.338859	0.329955
		5.25667	1.70016	1.40416	1.60946	1.67673	1.74375	1.57342	0.181444	0.34047	0.329696
		5.26	1.69965	1.40472	1.61016	1.6741	1.74278	1.57248	0.181203	0.34049	0.330134
		5.26333	1.69977	1.40437	1.60859	1.67197	1.7439	1.57194	0.18278	0.340545	0.330211
		5.26667	1.7003	1.40527	1.60805	1.6737	1.74546	1.57116	0.183716	0.339698	0.329597
		5.27	1.69929	1.40454	1.60887	1.67388	1.74613	1.57057	0.183553	0.338461	0.330599
		5.27333	1.69877	1.40372	1.61083	1.67207	1.74529	1.57146	0.182713	0.337869	0.330716
		5.27667	1.69895	1.40472	1.60965	1.67675	1.74493	1.57142	0.182903	0.337392	0.329276
		5.28	1.69934	1.40558	1.60999	1.67842	1.74521	1.57066	0.1824	0.337372	0.329257
		5.28333	1.69859	1.40456	1.61066	1.67654	1.74472	1.5716	0.181067	0.339244	0.329891
		5.28667	1.69889	1.40488	1.61097	1.67677	1.74311	1.57203	0.182171	0.339407	0.329676
		5.29	1.69786	1.40592	1.61068	1.68015	1.74284	1.57237	0.183877	0.340427	0.331483
		5.29333	1.69821	1.40455	1.61182	1.67934	1.74368	1.5744	0.183284	0.341158	0.330922
		5.29667	1.69849	1.40304	1.61319	1.68307	1.74613	1.57554	0.183501	0.340834	0.331654
		5.3	1.69842	1.40396	1.61387	1.68223	1.7477	1.57452	0.185057	0.340611	0.331713
		5.30333	1.69743	1.40368	1.61318	1.68357	1.74929	1.57495	0.182852	0.339341	0.332516
		5.30667	1.69879	1.40377	1.61379	1.67889	1.75101	1.57511	0.181723	0.337644	0.332159
		5.31	1.69932	1.40346	1.61348	1.67634	1.75348	1.57344	0.182763	0.338221	0.334239
		5.31333	1.69852	1.40456	1.61274	1.67375	1.75069	1.57421	0.183547	0.338705	0.333083
		5.31667	1.69882	1.4032	1.61319	1.67482	1.75077	1.57355	0.183706	0.338573	0.332672
		5.32	1.70084	1.40365	1.61356	1.67071	1.75035	1.57385	0.185176	0.339562	0.330949
		5.32333	1.70067	1.40457	1.61386	1.67361	1.75036	1.57521	0.184286	0.341726	0.330271
		5.32667	1.70112	1.4061	1.61499	1.67325	1.74748	1.57554	0.184142	0.340376	0.329837
		5.33	1.70162	1.40514	1.61572	1.67506	1.74753	1.57464	0.181097	0.339577	0.329654
		5.33333	1.7012	1.40601	1.61576	1.67619	1.74699	1.575	0.180812	0.340834	0.329596
		5.33667	1.69917	1.4056	1.61685	1.67979	1.747	1.57568	0.179673	0.339036	0.329736
		5.34	1.69778	1.40279	1.61801	1.67955	1.7448	1.57513	0.182502	0.338303	0.328544
		5.34333	1.69736	1.40317	1.61804	1.68157	1.74518	1.57332	0.181582	0.337948	0.329161
		5.34667	1.69681	1.4039	1.61939	1.67825	1.74513	1.57223	0.184144	0.338365	0.329581
		5.35	1.69682	1.40482	1.61911	1.67853	1.74539	1.57188	0.183514	0.336902	0.329029
		5.35333	1.69853	1.40408	1.62014	1.67778	1.74372	1.5715	0.183897	0.339344	0.329193
		5.35667	1.69994	1.4077	1.61885	1.67623	1.74399	1.56979	0.183118	0.337792	0.329319
		5.36	1.69986	1.40682	1.61981	1.67417	1.74518	1.57161	0.183119	0.338733	0.328783
		5.36333	1.70027	1.4067	1.61837	1.67829	1.74731	1.57258	0.18153	0.339275	0.328619
		5.36667	1.70148	1.40597	1.61855	1.67448	1.7468	1.57438	0.180756	0.339108	0.32731
		5.37	1.70125	1.40588	1.61733	1.67332	1.74966	1.57148	0.180962	0.337235	0.32892
		5.37333	1.70261	1.40383	1.61968	1.67608	1.75047	1.57256	0.179636	0.339322	0.329225
		5.37667	1.70435	1.40373	1.61776	1.67679	1.7502	1.57297	0.180397	0.337422	0.328707
		5.38	1.70474	1.40379	1.61926	1.67356	1.74846	1.57283	0.18029	0.33724	0.32983
		5.38333	1.70513	1.40384	1.62007	1.67699	1.74833	1.57306	0.181243	0.337079	0.331239
		5.38667	1.70541	1.40412	1.62027	1.67568	1.74769	1.57566	0.179884	0.337871	0.330695
		5.39	1.70399	1.40514	1.61822	1.67389	1.7476	1.57593	0.180306	0.336643	0.331071
		5.39333	1.70206	1.40451	1.6185	1.67487	1.74762	1.5753	0.180709	0.337311	0.331218
		5.39667	1.70215	1.40636	1.61811	1.67615	1.75016	1.57592	0.181371	0.336867	0.331055
		5.4	1.70036	1.40573	1.61786	1.67481	1.74969	1.574	0.180438	0.33646	0.330579
		5.40333	1.70061	1.40617	1.61866	1.67786	1.75008	1.57401	0.184134	0.337881	0.330016
		5.40667	1.70162	1.40661	1.62024	1.67771	1.75052	1.57334	0.18455	0.337023	0.32815
		5.41	1.70129	1.40783	1.62072	1.67619	1.75062	1.57231	0.184061	0.337524	0.328474
		5.41333	1.70128	1.40623	1.62217	1.67577	1.74726	1.5716	0.185146	0.338071	0.326568
		5.41667	1.70189	1.40619	1.6206	1.67336	1.74625	1.57269	0.185439	0.337765	0.328866
		5.42	1.70069	1.40614	1.62065	1.67064	1.74638	1.57272	0.184631	0.336767	0.328839
		5.42333	1.701	1.40565	1.61956	1.67095	1.74634	1.57345	0.183628	0.337526	0.332053
		5.42667	1.70011	1.40549	1.62036	1.67138	1.74421	1.57594	0.184442	0.337325	0.332384
		5.43	1.69912	1.40562	1.61941	1.66984	1.74891	1.57734	0.183077	0.336535	0.333071
		5.43333	1.69897	1.4064	1.6222	1.67226	1.74746	1.57698	0.18569	0.336412	0.33026
		5.43667	1.69881	1.40696	1.62221	1.67451	1.74812	1.57842	0.18428	0.336874	0.33134
		5.44	1.69703	1.40666	1.62257	1.6744	1.74675	1.57809	0.185329	0.336988	0.329253
		5.44333	1.69901	1.40653	1.62274	1.67417	1.74995	1.57572	0.186334	0.337145	0.329302
		5.44667	1.69954	1.40733	1.62335	1.67551	1.74526	1.57498	0.18794	0.337626	0.329125
		5.45	1.70045	1.40638	1.62181	1.67459	1.74907	1.57335	0.18634	0.337927	0.329643
		5.45333	1.70086	1.40594	1.62094	1.67367	1.74734	1.57149	0.18695	0.337851	0.330144
		5.45667	1.70177	1.40702	1.62091	1.67151	1.74701	1.57035	0.187641	0.337848	0.332024
		5.46	1.70033	1.40766	1.62222	1.67131	1.7443	1.57166	0.185145	0.339605	0.3298
		5.46333	1.70196	1.40697	1.62142	1.67221	1.74649	1.57218	0.186462	0.339352	0.330634
		5.46667	1.70161	1.40838	1.62213	1.67403	1.74674	1.57453	0.187461	0.340291	0.330828
		5.47	1.70154	1.40886	1.62261	1.67549	1.74716	1.57538	0.187557	0.340749	0.32959
		5.47333	1.70012	1.40702	1.62227	1.67704	1.74866	1.57706	0.186809	0.340355	0.328193
		5.47667	1.70118	1.40554	1.62051	1.67655	1.7493	1.57736	0.187908	0.339662	0.329894
		5.48	1.70027	1.40616	1.62052	1.67362	1.74903	1.57789	0.187085	0.338726	0.329198
		5.48333	1.70054	1.40561	1.61969	1.67498	1.75011	1.5767	0.186292	0.339555	0.329872
		5.48667	1.70138	1.40452	1.62064	1.67434	1.7515	1.57685	0.185883	0.338436	0.329123
		5.49	1.7009	1.40545	1.62155	1.67308	1.74985	1.57423	0.186651	0.338551	0.329554
		5.49333	1.70072	1.40538	1.62251	1.67585	1.75463	1.57456	0.186022	0.337009	0.330036
		5.49667	1.70082	1.40506	1.6235	1.67698	1.75389	1.57353	0.183763	0.337722	0.329247
		5.5	1.70112	1.40599	1.62391	1.67425	1.75182	1.5742	0.183697	0.336792	0.328796
		5.50333	1.70072	1.40807	1.6232	1.6751	1.74828	1.57358	0.183848	0.336245	0.329182
		5.50667	1.70352	1.40653	1.62239	1.67421	1.74965	1.57488	0.182555	0.335958	0.329111
		5.51	1.70315	1.40959	1.62102	1.67076	1.74643	1.57303	0.182325	0.336551	0.327522
		5.51333	1.70338	1.41042	1.61915	1.67077	1.74694	1.57346	0.181181	0.335506	0.329052
		5.51667	1.70406	1.40791	1.62059	1.67022	1.74823	1.5729	0.182364	0.335206	0.328247
		5.52	1.7032	1.40748	1.62085	1.66704	1.74923	1.57267	0.184093	0.334912	0.328392
		5.52333	1.70381	1.40993	1.62033	1.67104	1.7493	1.57186	0.184069	0.335637	0.328232
		5.52667	1.70432	1.40818	1.62063	1.67297	1.7493	1.57243	0.18377	0.335448	0.329183
		5.53	1.70407	1.40738	1.62188	1.67407	1.74976	1.57149	0.185958	0.337865	0.329624
		5.53333	1.70312	1.40828	1.62155	1.67518	1.74819	1.57072	0.1841	0.337954	0.33016
		5.53667	1.70441	1.40881	1.62146	1.67945	1.7471	1.56921	0.18217	0.339771	0.331163
		5.54	1.7029	1.40851	1.62218	1.67844	1.74812	1.57134	0.18367	0.340946	0.331107
		5.54333	1.7012	1.40841	1.62188	1.67889	1.74669	1.57056	0.185136	0.341096	0.330422
		5.54667	1.70155	1.40852	1.62248	1.68208	1.74541	1.57132	0.184086	0.340183	0.330166
		5.55	1.7008	1.40994	1.62182	1.68162	1.74579	1.57135	0.185212	0.340267	0.329902
		5.55333	1.70063	1.40954	1.62295	1.67818	1.75132	1.57337	0.184575	0.340942	0.328519
		5.55667	1.70163	1.40926	1.62369	1.67897	1.7496	1.57329	0.184829	0.338688	0.328978
		5.56	1.70443	1.40925	1.62506	1.67707	1.74944	1.5736	0.184293	0.339045	0.329833
		5.56333	1.70549	1.41159	1.62435	1.67584	1.75129	1.57354	0.185839	0.339456	0.328409
		5.56667	1.70676	1.41071	1.62478	1.68058	1.75166	1.57362	0.186641	0.339077	0.328558
		5.57	1.70581	1.4117	1.62281	1.68257	1.74893	1.57215	0.188275	0.33727	0.328737
		5.57333	1.70552	1.41303	1.62219	1.68223	1.75004	1.57098	0.187111	0.337804	0.32765
		5.57667	1.70497	1.41345	1.62257	1.68341	1.74993	1.57084	0.185307	0.336588	0.326768
		5.58	1.70261	1.41185	1.62306	1.67775	1.75056	1.56885	0.185734	0.336918	0.327719
		5.58333	1.70188	1.41296	1.62321	1.6743	1.7495	1.56908	0.184493	0.336711	0.328624
		5.58667	1.704	1.41151	1.62438	1.67657	1.75055	1.56969	0.182414	0.337228	0.328993
		5.59	1.70406	1.41075	1.62491	1.67737	1.74991	1.57124	0.181423	0.337941	0.33007
		5.59333	1.7043	1.40969	1.62351	1.67844	1.75093	1.57303	0.183986	0.338716	0.331014
		5.59667	1.70557	1.40987	1.62289	1.681	1.7489	1.57474	0.182887	0.338119	0.329261
		5.6	1.70453	1.41021	1.62245	1.68153	1.74961	1.57656	0.182986	0.338468	0.327146
		5.60333	1.70311	1.41105	1.62233	1.68161	1.7484	1.57685	0.184939	0.337613	0.326599
		5.60667	1.70273	1.41044	1.62291	1.67912	1.74949	1.57643	0.184013	0.337203	0.326597
		5.61	1.70219	1.41152	1.62311	1.67812	1.74946	1.57571	0.184145	0.338235	0.325932
		5.61333	1.70155	1.4103	1.62384	1.67912	1.74956	1.57639	0.185483	0.338404	0.328104
		5.61667	1.70186	1.40806	1.62529	1.68177	1.75015	1.57547	0.184103	0.338623	0.329308
		5.62	1.70234	1.40754	1.62457	1.68213	1.74979	1.57683	0.183027	0.340116	0.33092
		5.62333	1.70337	1.4075	1.62313	1.68608	1.74961	1.57643	0.184595	0.340983	0.331476
		5.62667	1.70271	1.40735	1.62343	1.68485	1.75141	1.57639	0.183034	0.34097	0.33206
		5.63	1.70311	1.40859	1.6222	1.68438	1.75155	1.57576	0.181424	0.341837	0.330456
		5.63333	1.70431	1.41055	1.61976	1.68082	1.75297	1.57587	0.182315	0.342079	0.331458
		5.63667	1.70362	1.41086	1.61966	1.67857	1.75422	1.57509	0.181992	0.342777	0.331582
		5.64	1.70237	1.41161	1.62153	1.67863	1.7539	1.57636	0.182204	0.342238	0.330228
		5.64333	1.70232	1.41174	1.62239	1.67994	1.75078	1.57595	0.182872	0.340691	0.330477
		5.64667	1.70324	1.41125	1.62289	1.68355	1.75088	1.5751	0.183942	0.34089	0.330365
		5.65	1.70302	1.41179	1.62526	1.68687	1.7486	1.57552	0.185291	0.34004	0.329238
		5.65333	1.70343	1.41069	1.62638	1.68541	1.74755	1.57439	0.185832	0.339048	0.327854
		5.65667	1.70355	1.40971	1.62644	1.68358	1.74943	1.57332	0.185832	0.338783	0.327298
		5.66	1.70573	1.40968	1.62617	1.68583	1.75113	1.57262	0.183621	0.338633	0.326907
		5.66333	1.70692	1.40971	1.62727	1.6835	1.75153	1.57296	0.182788	0.337444	0.327162
		5.66667	1.70704	1.40773	1.62647	1.6854	1.75326	1.57142	0.182655	0.338024	0.326722
		5.67	1.70671	1.40849	1.6266	1.68562	1.75342	1.57295	0.182291	0.337219	0.326311
		5.67333	1.70641	1.41115	1.62572	1.68096	1.75159	1.57284	0.181389	0.338527	0.326925
		5.67667	1.70485	1.41106	1.62577	1.67987	1.75211	1.57422	0.18238	0.339955	0.326548
		5.68	1.70373	1.41154	1.62668	1.67737	1.75239	1.57249	0.181668	0.33892	0.328073
		5.68333	1.70245	1.41314	1.62707	1.6757	1.75191	1.57351	0.180567	0.338022	0.329686
		5.68667	1.7036	1.41311	1.62616	1.6778	1.75143	1.57267	0.1804	0.337866	0.329747
		5.69	1.7047	1.41127	1.62688	1.68496	1.75315	1.57075	0.180738	0.337166	0.330435
		5.69333	1.70518	1.41163	1.62647	1.68423	1.75214	1.56874	0.181141	0.337268	0.332171
		5.69667	1.70531	1.4116	1.62589	1.68646	1.75088	1.5708	0.182096	0.339127	0.33077
		5.7	1.70726	1.41205	1.62669	1.68492	1.75168	1.57139	0.182678	0.340836	0.330285
		5.70333	1.70665	1.41205	1.62711	1.68586	1.75251	1.57052	0.183407	0.34042	0.330665
		5.70667	1.7059	1.41224	1.62705	1.68248	1.74972	1.57207	0.185399	0.338781	0.330517
		5.71	1.7055	1.41222	1.62824	1.68721	1.75071	1.57458	0.186154	0.33698	0.329142
		5.71333	1.70333	1.41186	1.62804	1.68542	1.75027	1.57369	0.184654	0.335677	0.330211
		5.71667	1.70259	1.4101	1.62649	1.68296	1.75095	1.57237	0.183632	0.333923	0.331547
		5.72	1.70198	1.41035	1.627	1.68095	1.74714	1.57409	0.184359	0.336056	0.331074
		5.72333	1.70242	1.41229	1.62757	1.68118	1.75	1.57373	0.182147	0.336842	0.331662
		5.72667	1.70194	1.41296	1.62535	1.67323	1.75041	1.57224	0.182403	0.337408	0.330334
		5.73	1.70332	1.41287	1.62447	1.6739	1.75205	1.57352	0.185252	0.33834	0.330201
		5.73333	1.70467	1.41487	1.62443	1.6737	1.75016	1.57441	0.184519	0.339937	0.32818
		5.73667	1.70562	1.41357	1.62466	1.67251	1.75318	1.57289	0.183407	0.338169	0.328974
		5.74	1.70586	1.41316	1.62339	1.67534	1.75069	1.57311	0.18174	0.338014	0.328296
		5.74333	1.70689	1.41243	1.62374	1.68294	1.75084	1.57402	0.180819	0.338151	0.330799
		5.74667	1.70643	1.41065	1.62416	1.68327	1.75098	1.57485	0.179929	0.33798	0.33087
		5.75	1.70438	1.41072	1.6241	1.68672	1.75119	1.57424	0.181522	0.337739	0.33159
		5.75333	1.70349	1.41236	1.62414	1.68761	1.75158	1.57312	0.182293	0.340037	0.331281
		5.75667	1.70281	1.41089	1.62488	1.68512	1.75268	1.57384	0.18551	0.339228	0.330699
		5.76	1.70218	1.41229	1.62489	1.68154	1.75107	1.57571	0.186756	0.340324	0.328455
		5.76333	1.70157	1.41456	1.6258	1.68253	1.75189	1.57536	0.18461	0.34038	0.328944
		5.76667	1.70173	1.41352	1.62719	1.68038	1.75269	1.57635	0.184717	0.341014	0.327709
		5.77	1.7029	1.41426	1.62657	1.68204	1.75171	1.57901	0.185361	0.339378	0.326996
		5.77333	1.70265	1.41577	1.62666	1.68274	1.7516	1.57866	0.183022	0.340245	0.328166
		5.77667	1.7045	1.41449	1.62809	1.68277	1.7533	1.57682	0.183311	0.339609	0.330624
		5.78	1.7064	1.41348	1.62793	1.68232	1.75229	1.57821	0.183546	0.339239	0.329168
		5.78333	1.70748	1.4139	1.62747	1.68384	1.75083	1.57747	0.183384	0.338291	0.328941
		5.78667	1.70676	1.41361	1.62718	1.68232	1.75368	1.57526	0.18198	0.339649	0.330363
		5.79	1.70717	1.41235	1.62603	1.68099	1.75394	1.57503	0.183346	0.340347	0.329832
		5.79333	1.70591	1.41314	1.62573	1.68185	1.75325	1.57562	0.18188	0.339503	0.32808
		5.79667	1.70482	1.4154	1.62586	1.68105	1.7516	1.57487	0.182547	0.339582	0.328646
		5.8	1.70485	1.41613	1.62537	1.67826	1.75073	1.57525	0.181859	0.340662	0.329821
		5.80333	1.70553	1.41635	1.62531	1.68098	1.74886	1.5769	0.183256	0.339155	0.329138
		5.80667	1.70737	1.41618	1.62611	1.68273	1.74785	1.5787	0.183709	0.338837	0.329466
		5.81	1.70809	1.41483	1.6264	1.68383	1.74957	1.57582	0.184459	0.33988	0.329607
		5.81333	1.70997	1.41179	1.62553	1.68348	1.75138	1.57515	0.182917	0.341143	0.329044
		5.81667	1.71076	1.41193	1.62513	1.68774	1.75259	1.57483	0.184455	0.338537	0.329783
		5.82	1.71084	1.41123	1.6264	1.68754	1.75272	1.57334	0.183266	0.339667	0.329817
		5.82333	1.7099	1.41096	1.62568	1.68634	1.75311	1.57308	0.183384	0.34044	0.32908
		5.82667	1.70901	1.41174	1.62691	1.68474	1.75006	1.57408	0.183101	0.339449	0.328351
		5.83	1.70765	1.41401	1.62653	1.68644	1.74979	1.5731	0.18338	0.338641	0.328881
		5.83333	1.70747	1.41432	1.62687	1.68136	1.75037	1.5743	0.182492	0.341206	0.326176
		5.83667	1.70737	1.41412	1.62631	1.67942	1.75046	1.57579	0.183533	0.340884	0.326084
		5.84	1.70734	1.41398	1.62774	1.68022	1.75045	1.5755	0.1834	0.340472	0.326173
		5.84333	1.70809	1.41472	1.62558	1.67977	1.75268	1.57818	0.182995	0.340589	0.327237
		5.84667	1.70769	1.4144	1.62501	1.67763	1.75324	1.57774	0.18483	0.340455	0.325961
		5.85	1.70729	1.4145	1.6233	1.68123	1.75303	1.57615	0.184182	0.33999	0.327838
		5.85333	1.70901	1.415	1.62394	1.68116	1.7554	1.57566	0.185284	0.339756	0.327602
		5.85667	1.70815	1.41583	1.62434	1.68135	1.75444	1.57626	0.185009	0.339435	0.328367
		5.86	1.70845	1.4145	1.62612	1.67916	1.75605	1.57514	0.185902	0.340371	0.328361
		5.86333	1.70922	1.41548	1.62703	1.67998	1.75473	1.57663	0.185552	0.340434	0.33013
		5.86667	1.70989	1.41423	1.62999	1.68031	1.7548	1.57667	0.186072	0.340523	0.330183
		5.87	1.70762	1.41452	1.62992	1.67769	1.75166	1.5765	0.184547	0.340303	0.329746
		5.87333	1.70809	1.41525	1.62998	1.67476	1.75359	1.57497	0.18381	0.340516	0.329822
		5.87667	1.70607	1.41711	1.62917	1.67837	1.74979	1.57702	0.182395	0.33954	0.32954
		5.88	1.70439	1.41642	1.63011	1.6795	1.75071	1.57753	0.182058	0.338657	0.328969
		5.88333	1.70393	1.41739	1.62897	1.6785	1.74913	1.57906	0.18216	0.338557	0.328921
		5.88667	1.70411	1.41769	1.62766	1.68058	1.75004	1.58001	0.181488	0.339759	0.329403
		5.89	1.70475	1.41702	1.62679	1.68253	1.75021	1.58128	0.182941	0.337942	0.328923
		5.89333	1.70707	1.41668	1.62678	1.68204	1.7514	1.57929	0.184526	0.338097	0.329751
		5.89667	1.70831	1.41593	1.62677	1.68157	1.75247	1.57889	0.184472	0.339703	0.330683
		5.9	1.70855	1.41404	1.62796	1.67874	1.75315	1.57981	0.187626	0.338385	0.329398
		5.90333	1.70944	1.41387	1.63029	1.6781	1.75363	1.58067	0.188526	0.337697	0.330422
		5.90667	1.70904	1.41398	1.62921	1.6788	1.75264	1.581	0.189025	0.339841	0.329882
		5.91	1.70743	1.41387	1.62967	1.68006	1.75286	1.57894	0.186732	0.339456	0.329827
		5.91333	1.70775	1.41585	1.62981	1.68282	1.75147	1.57934	0.187875	0.337987	0.328211
		5.91667	1.70782	1.41738	1.63068	1.68666	1.75256	1.57803	0.185949	0.33824	0.329999
		5.92	1.70825	1.41743	1.63039	1.68868	1.7517	1.57796	0.185915	0.337842	0.329715
		5.92333	1.70937	1.41788	1.62985	1.6902	1.75317	1.57784	0.183812	0.337973	0.33012
		5.92667	1.71119	1.41675	1.6323	1.68827	1.75333	1.58017	0.185762	0.338626	0.330036
		5.93	1.71019	1.41559	1.63229	1.68649	1.75449	1.58055	0.184914	0.338688	0.330751
		5.93333	1.71073	1.41761	1.63127	1.68354	1.75364	1.58104	0.182468	0.339656	0.329154
		5.93667	1.70805	1.41755	1.62943	1.68409	1.75289	1.58037	0.181779	0.340013	0.328449
		5.94	1.70654	1.41801	1.63164	1.68346	1.75159	1.57996	0.184034	0.339146	0.328488
		5.94333	1.70557	1.41873	1.62885	1.68237	1.75122	1.5801	0.181927	0.339359	0.328102
		5.94667	1.70564	1.41857	1.62801	1.68282	1.75144	1.5796	0.181506	0.340338	0.32773
		5.95	1.70382	1.41625	1.62649	1.68748	1.75237	1.57906	0.183632	0.338817	0.329334
		5.95333	1.70543	1.41652	1.62813	1.68592	1.75392	1.57878	0.181807	0.339359	0.330082
		5.95667	1.7069	1.41585	1.62787	1.68534	1.7547	1.57916	0.181019	0.338406	0.329853
		5.96	1.7068	1.41497	1.62859	1.68422	1.75502	1.57971	0.182926	0.337591	0.32967
		5.96333	1.70829	1.41671	1.62884	1.68184	1.75484	1.57908	0.183283	0.336404	0.331336
		5.96667	1.70943	1.41803	1.6293	1.67938	1.75536	1.57929	0.183791	0.337068	0.331095
		5.97	1.70958	1.41837	1.62876	1.67983	1.7554	1.58052	0.185533	0.335721	0.329617
		5.97333	1.70934	1.41849	1.62921	1.67674	1.7545	1.57957	0.187147	0.337323	0.328544
		5.97667	1.70794	1.41967	1.62779	1.67813	1.75501	1.5799	0.187392	0.336433	0.328276
		5.98	1.70692	1.4191	1.62825	1.68013	1.75748	1.58013	0.187416	0.337594	0.327213
		5.98333	1.70747	1.41864	1.62819	1.67955	1.75477	1.58074	0.185141	0.33696	0.327044
		5.98667	1.70774	1.418	1.62914	1.67986	1.75793	1.58047	0.18515	0.337236	0.327849
		5.99	1.70692	1.41757	1.62886	1.68244	1.75678	1.58075	0.182274	0.33713	0.328761
		5.99333	1.70885	1.41842	1.63022	1.68427	1.75769	1.58119	0.181997	0.33813	0.328119
		5.99667	1.7089	1.41678	1.62992	1.68644	1.75556	1.58197	0.181162	0.338278	0.327656
		6	1.70688	1.41667	1.63172	1.68851	1.75747	1.58198	0.183052	0.337498	0.327133
		6.00333	1.70668	1.41905	1.63164	1.6892	1.75448	1.58148	0.182533	0.338095	0.326637
		6.00667	1.70735	1.41785	1.63216	1.68771	1.75613	1.58301	0.182936	0.337181	0.326956
		6.01	1.70693	1.41766	1.63137	1.68981	1.75421	1.58165	0.18406	0.337808	0.328831
		6.01333	1.70822	1.41884	1.63196	1.68847	1.75296	1.58184	0.185352	0.337543	0.33023
		6.01667	1.71052	1.41955	1.63064	1.68623	1.75216	1.57987	0.184558	0.337749	0.33116
		6.02	1.7108	1.41671	1.62936	1.68637	1.75021	1.57979	0.185215	0.337132	0.330683
		6.02333	1.71027	1.41905	1.62933	1.68817	1.74973	1.57817	0.186092	0.33719	0.331429
		6.02667	1.71073	1.41967	1.62944	1.68521	1.75035	1.57859	0.185752	0.336192	0.331052
		6.03	1.70941	1.41988	1.62892	1.68196	1.75023	1.578	0.184925	0.335371	0.329718
		6.03333	1.70951	1.41843	1.63086	1.68193	1.75107	1.57975	0.18662	0.336617	0.328616
		6.03667	1.71033	1.41955	1.63049	1.68215	1.75286	1.58077	0.187266	0.337254	0.329143
		6.04	1.71013	1.4186	1.62873	1.68242	1.75416	1.58185	0.186274	0.338737	0.327036
		6.04333	1.7108	1.41889	1.62977	1.68142	1.75308	1.58131	0.187024	0.339452	0.327135
		6.04667	1.71156	1.41779	1.63067	1.68112	1.75399	1.58197	0.186547	0.338892	0.328414
		6.05	1.71196	1.42074	1.62878	1.68297	1.75459	1.58129	0.184467	0.338421	0.327649
		6.05333	1.71155	1.42175	1.62994	1.68063	1.75422	1.58078	0.182851	0.337685	0.327868
		6.05667	1.71172	1.42124	1.63107	1.68186	1.75318	1.58021	0.183597	0.337788	0.32957
		6.06	1.71095	1.42155	1.63026	1.68353	1.75415	1.58086	0.180538	0.337465	0.328925
		6.06333	1.71059	1.4211	1.63001	1.68748	1.75372	1.58026	0.181218	0.33876	0.327812
		6.06667	1.71061	1.41914	1.6306	1.68512	1.75264	1.58106	0.181779	0.340484	0.33033
		6.07	1.71155	1.41786	1.63084	1.68632	1.75328	1.58113	0.182479	0.339693	0.329879
		6.07333	1.71349	1.41886	1.63073	1.68686	1.75337	1.58029	0.181887	0.33997	0.328789
		6.07667	1.71318	1.41829	1.63139	1.68827	1.75379	1.57923	0.183527	0.339642	0.328149
		6.08	1.71389	1.41958	1.63089	1.68698	1.75389	1.5796	0.184029	0.339081	0.329024
		6.08333	1.71264	1.41948	1.63158	1.68951	1.7562	1.57905	0.184967	0.337825	0.327567
		6.08667	1.71074	1.41944	1.63108	1.69141	1.75582	1.57792	0.186288	0.338278	0.327383
		6.09	1.70913	1.41924	1.63225	1.6903	1.75792	1.57973	0.186801	0.337411	0.327675
		6.09333	1.70918	1.41864	1.63301	1.68823	1.75753	1.58061	0.187644	0.337616	0.329802
		6.09667	1.70877	1.41899	1.63218	1.6902	1.75929	1.57953	0.18718	0.339335	0.330048
		6.1	1.70946	1.41875	1.63032	1.68911	1.75516	1.57826	0.18586	0.339445	0.330948
		6.10333	1.71139	1.41833	1.63076	1.6892	1.75731	1.57999	0.186149	0.340021	0.330875
		6.10667	1.71197	1.41973	1.63037	1.68951	1.754	1.57979	0.185264	0.339793	0.331701
		6.11	1.7135	1.42	1.6287	1.68959	1.7572	1.58181	0.185902	0.3394	0.332164
		6.11333	1.71415	1.4182	1.6289	1.68862	1.75401	1.58377	0.187228	0.338567	0.330067
		6.11667	1.71374	1.41929	1.63036	1.69072	1.75615	1.58609	0.189229	0.33882	0.328782
		6.12	1.71322	1.41998	1.62998	1.68901	1.75509	1.58573	0.188817	0.339865	0.328401
		6.12333	1.7138	1.41905	1.62929	1.68751	1.75537	1.58468	0.190039	0.338883	0.328256
		6.12667	1.71197	1.41937	1.63015	1.68883	1.75209	1.58393	0.189601	0.34009	0.326207
		6.13	1.71062	1.42027	1.6323	1.68756	1.75313	1.58312	0.187731	0.339598	0.326635
		6.13333	1.71028	1.41918	1.63276	1.68714	1.75166	1.58228	0.186043	0.339191	0.32718
		6.13667	1.71018	1.41835	1.63231	1.68797	1.75014	1.58126	0.183954	0.338227	0.328525
		6.14	1.70851	1.41846	1.63294	1.69038	1.75082	1.58175	0.183509	0.338261	0.327773
		6.14333	1.70906	1.41824	1.63285	1.68998	1.74893	1.58123	0.182201	0.338245	0.327822
		6.14667	1.71056	1.41884	1.63149	1.69008	1.75052	1.58266	0.184302	0.338342	0.327557
		6.15	1.71023	1.419	1.63066	1.68653	1.75322	1.58407	0.185576	0.337588	0.328766
		6.15333	1.7108	1.41981	1.63291	1.69144	1.75357	1.58547	0.18823	0.338415	0.32855
		6.15667	1.71306	1.41913	1.63207	1.68806	1.75399	1.58582	0.189141	0.339295	0.328109
		6.16	1.71442	1.41806	1.63259	1.68881	1.75535	1.58731	0.189278	0.339083	0.329468
		6.16333	1.71523	1.4184	1.63211	1.69225	1.75324	1.58597	0.188567	0.338393	0.33137
		6.16667	1.71688	1.41855	1.63251	1.69325	1.75307	1.58326	0.190299	0.340263	0.329328
		6.17	1.71644	1.41869	1.63111	1.689	1.75322	1.58112	0.191362	0.338534	0.329009
		6.17333	1.71524	1.42011	1.63297	1.69156	1.75361	1.58212	0.189678	0.3398	0.330394
		6.17667	1.71401	1.42055	1.63239	1.69004	1.75205	1.58138	0.191896	0.338041	0.329354
		6.18	1.71202	1.42097	1.63293	1.68684	1.75267	1.58161	0.19341	0.338863	0.327998
		6.18333	1.71168	1.42191	1.63338	1.68621	1.75192	1.58266	0.191016	0.338238	0.328352
		6.18667	1.71226	1.42173	1.63415	1.6867	1.75228	1.58414	0.189213	0.338373	0.328382
		6.19	1.71338	1.42063	1.63221	1.68547	1.75191	1.58421	0.189453	0.337258	0.327968
		6.19333	1.71431	1.4208	1.63273	1.68597	1.75343	1.58201	0.187493	0.33959	0.32813
		6.19667	1.71448	1.4203	1.63213	1.68566	1.7541	1.58074	0.185651	0.339959	0.329265
		6.2	1.71473	1.41974	1.63161	1.68947	1.75422	1.58117	0.186328	0.338613	0.328627
		6.20333	1.71415	1.42087	1.63038	1.6893	1.75531	1.58253	0.185542	0.339327	0.329044
		6.20667	1.71288	1.42166	1.63072	1.6903	1.75483	1.58108	0.186363	0.339143	0.329903
		6.21	1.7118	1.42046	1.63126	1.68931	1.75453	1.58042	0.187801	0.338812	0.330006
		6.21333	1.71165	1.42077	1.63272	1.68726	1.75723	1.58107	0.187807	0.338676	0.329224
		6.21667	1.71134	1.42276	1.63207	1.68602	1.75489	1.58005	0.186196	0.339969	0.330054
		6.22	1.71069	1.42152	1.6319	1.68597	1.75723	1.58001	0.186113	0.338698	0.328717
		6.22333	1.71045	1.42176	1.63326	1.68587	1.7553	1.58064	0.186567	0.339229	0.326703
		6.22667	1.71122	1.42432	1.63232	1.68679	1.76025	1.58308	0.186974	0.339095	0.325686
		6.23	1.71249	1.42693	1.63241	1.69025	1.75502	1.58456	0.186229	0.337875	0.326938
		6.23333	1.71296	1.42449	1.63379	1.68914	1.75641	1.58738	0.18602	0.336286	0.326072
		6.23667	1.71319	1.42648	1.63511	1.68756	1.7525	1.58763	0.186575	0.336662	0.327492
		6.24	1.71278	1.42613	1.63351	1.6877	1.75463	1.58862	0.187237	0.336371	0.328297
		6.24333	1.71101	1.42497	1.63321	1.68856	1.75105	1.58834	0.185245	0.336856	0.328393
		6.24667	1.71128	1.42345	1.63331	1.68832	1.75433	1.58767	0.184393	0.338111	0.326961
		6.25	1.70868	1.42439	1.63304	1.68788	1.75484	1.5849	0.184696	0.338675	0.327438
		6.25333	1.70847	1.4235	1.63136	1.69249	1.75646	1.58278	0.185143	0.340143	0.326956
		6.25667	1.70842	1.42372	1.63175	1.68865	1.7553	1.58188	0.182616	0.339907	0.327759
		6.26	1.7104	1.42388	1.63142	1.69368	1.75484	1.58072	0.181631	0.338731	0.327556
		6.26333	1.70919	1.42271	1.63174	1.68928	1.75391	1.5821	0.185527	0.338696	0.328005
		6.26667	1.71052	1.42295	1.63081	1.69022	1.75554	1.58617	0.185624	0.338322	0.329095
		6.27	1.71098	1.42334	1.63212	1.68665	1.75348	1.58696	0.184497	0.337123	0.330734
		6.27333	1.71202	1.42435	1.63319	1.69156	1.75376	1.58584	0.188	0.337317	0.330158
		6.27667	1.71125	1.42363	1.63406	1.68759	1.75359	1.58923	0.190361	0.3374	0.330783
		6.28	1.71229	1.42298	1.63353	1.69165	1.75399	1.58733	0.187463	0.337342	0.331252
		6.28333	1.71367	1.42124	1.63373	1.69218	1.75134	1.58661	0.188986	0.338885	0.330623
		6.28667	1.71413	1.42046	1.63385	1.69024	1.75227	1.58638	0.188429	0.338132	0.330117
		6.29	1.71367	1.41795	1.63288	1.69094	1.75335	1.5872	0.185262	0.338058	0.330647
		6.29333	1.71348	1.4178	1.63299	1.68967	1.75315	1.58334	0.18459	0.338482	0.331081
		6.29667	1.71379	1.42025	1.63129	1.69061	1.75328	1.58337	0.185003	0.338208	0.330588
		6.3	1.71284	1.42105	1.63256	1.69022	1.75634	1.58087	0.183667	0.33773	0.330014
		6.30333	1.71289	1.42013	1.63273	1.69152	1.75715	1.58151	0.184751	0.339315	0.328797
		6.30667	1.71407	1.42112	1.63313	1.69125	1.75834	1.58311	0.18498	0.338086	0.328027
		6.31	1.71637	1.42186	1.63305	1.69392	1.75986	1.58552	0.184858	0.338162	0.327717
		6.31333	1.71615	1.4211	1.6344	1.69547	1.76035	1.58687	0.186072	0.337918	0.327531
		6.31667	1.71634	1.42144	1.63341	1.69569	1.75988	1.58778	0.186463	0.338031	0.328005
		6.32	1.71506	1.42336	1.633	1.69749	1.75841	1.58831	0.185327	0.338422	0.328392
		6.32333	1.71529	1.42282	1.63278	1.69824	1.75698	1.58755	0.184954	0.339686	0.328572
		6.32667	1.7141	1.42179	1.63294	1.69695	1.75651	1.58789	0.184534	0.339388	0.328834
		6.33	1.71329	1.42183	1.63383	1.69506	1.7573	1.58755	0.182775	0.339702	0.32943
		6.33333	1.71443	1.42229	1.63419	1.69665	1.75833	1.58739	0.183566	0.339858	0.329817
		6.33667	1.71585	1.42198	1.63475	1.69534	1.75842	1.58718	0.184111	0.339244	0.329949
		6.34	1.71559	1.42268	1.63467	1.69247	1.7598	1.58621	0.183879	0.338094	0.329787
		6.34333	1.71568	1.42444	1.63564	1.69102	1.75959	1.58727	0.183692	0.338545	0.329021
		6.34667	1.71606	1.42354	1.63374	1.6916	1.75671	1.58643	0.184379	0.339018	0.327337
		6.35	1.71485	1.4244	1.63415	1.69249	1.75503	1.58631	0.182379	0.340369	0.326995
		6.35333	1.71434	1.4241	1.63403	1.69294	1.75513	1.58718	0.183119	0.338478	0.326015
		6.35667	1.71279	1.42339	1.63378	1.69484	1.75472	1.58831	0.183482	0.34009	0.327053
		6.36	1.71179	1.4231	1.633	1.6939	1.75549	1.58694	0.183509	0.339772	0.327317
		6.36333	1.71114	1.42344	1.63295	1.69318	1.75609	1.58699	0.182476	0.339588	0.327699
		6.36667	1.7122	1.42274	1.63151	1.6921	1.75529	1.5884	0.184835	0.337077	0.325921
		6.37	1.7126	1.42373	1.63105	1.69168	1.75509	1.58838	0.184716	0.338107	0.3274
		6.37333	1.71466	1.42442	1.63207	1.69131	1.75548	1.58869	0.185268	0.338018	0.326986
		6.37667	1.71773	1.42463	1.63102	1.69409	1.75291	1.58911	0.185562	0.337326	0.327837
		6.38	1.71922	1.42478	1.63255	1.69517	1.75378	1.5879	0.186642	0.336876	0.329329
		6.38333	1.71886	1.42417	1.63323	1.69507	1.75473	1.58658	0.185815	0.33648	0.330312
		6.38667	1.7171	1.42311	1.63461	1.69564	1.75721	1.58544	0.186944	0.336807	0.330122
		6.39	1.71541	1.42347	1.63423	1.69565	1.75829	1.58617	0.187406	0.335958	0.329407
		6.39333	1.71401	1.42384	1.63653	1.6939	1.76109	1.5857	0.188131	0.337279	0.327729
		6.39667	1.71254	1.4235	1.6351	1.69288	1.7607	1.58614	0.187028	0.337523	0.327911
		6.4	1.71141	1.42436	1.63565	1.69285	1.76034	1.58591	0.187359	0.338917	0.327489
		6.40333	1.71293	1.42475	1.63348	1.69254	1.75954	1.58566	0.187183	0.339533	0.326843
		6.40667	1.71451	1.4242	1.63408	1.69178	1.75826	1.58539	0.1862	0.339941	0.326366
		6.41	1.71396	1.42415	1.63403	1.69282	1.7584	1.58505	0.184656	0.338367	0.32821
		6.41333	1.71573	1.42465	1.63583	1.69192	1.75899	1.58614	0.185644	0.338522	0.327063
		6.41667	1.71615	1.42442	1.63549	1.69117	1.75869	1.58559	0.185089	0.338923	0.328698
		6.42	1.71655	1.42523	1.63618	1.69188	1.75827	1.586	0.184272	0.337749	0.3288
		6.42333	1.7157	1.42581	1.63522	1.6922	1.75732	1.58598	0.186051	0.338153	0.330275
		6.42667	1.71516	1.42447	1.63413	1.69005	1.75549	1.58569	0.186336	0.338935	0.328843
		6.43	1.71323	1.42572	1.63211	1.69099	1.75557	1.58509	0.187096	0.338521	0.328725
		6.43333	1.71277	1.42606	1.6316	1.69067	1.7582	1.58622	0.188086	0.338823	0.327916
		6.43667	1.71236	1.42622	1.63288	1.68955	1.759	1.58729	0.185835	0.340346	0.329213
		6.44	1.71401	1.42609	1.63445	1.68849	1.76001	1.58669	0.186151	0.33955	0.329577
		6.44333	1.71643	1.4273	1.63482	1.68946	1.7617	1.58766	0.186736	0.34097	0.3297
		6.44667	1.71802	1.42693	1.63621	1.6898	1.76235	1.58862	0.186185	0.340805	0.329671
		6.45	1.71907	1.42654	1.63615	1.69082	1.76144	1.58925	0.186308	0.340202	0.331259
		6.45333	1.7182	1.42545	1.63524	1.69015	1.76172	1.58828	0.188487	0.339828	0.329448
		6.45667	1.71672	1.42642	1.63472	1.69366	1.7631	1.58755	0.187023	0.340857	0.328152
		6.46	1.71521	1.42461	1.63466	1.6943	1.76382	1.58583	0.18729	0.339123	0.328588
		6.46333	1.714	1.42387	1.63465	1.69283	1.76231	1.58706	0.187081	0.339286	0.32829
		6.46667	1.71367	1.42385	1.63482	1.69186	1.76037	1.58692	0.185585	0.338467	0.325129
		6.47	1.71394	1.42413	1.63486	1.69253	1.75921	1.58646	0.183498	0.338543	0.325881
		6.47333	1.71335	1.42339	1.63355	1.68953	1.75733	1.58815	0.184294	0.336369	0.325202
		6.47667	1.71303	1.42422	1.63422	1.68963	1.7541	1.58916	0.183441	0.337021	0.325526
		6.48	1.71381	1.42507	1.63335	1.69213	1.7555	1.58895	0.182955	0.336905	0.32493
		6.48333	1.71411	1.42504	1.63452	1.6944	1.75704	1.58973	0.183293	0.337812	0.326775
		6.48667	1.71543	1.42482	1.6349	1.69245	1.75735	1.59197	0.185642	0.336941	0.325955
		6.49	1.7175	1.42466	1.636	1.69301	1.75909	1.5914	0.185299	0.338325	0.326621
		6.49333	1.71792	1.42489	1.63543	1.69259	1.76294	1.59127	0.185524	0.338699	0.326184
		6.49667	1.71989	1.42575	1.63684	1.69112	1.76311	1.59065	0.184112	0.339371	0.327331
		6.5	1.72065	1.42581	1.63596	1.68822	1.76226	1.58951	0.183038	0.339326	0.327
		6.50333	1.71972	1.42565	1.63548	1.68981	1.76211	1.58739	0.182694	0.340657	0.328015
		6.50667	1.71857	1.42472	1.63579	1.68978	1.76133	1.58595	0.183068	0.340688	0.328188
		6.51	1.71837	1.42654	1.63517	1.69011	1.76041	1.58603	0.184293	0.340357	0.328222
		6.51333	1.71586	1.42564	1.63539	1.69074	1.7603	1.58635	0.187384	0.339235	0.328249
		6.51667	1.71602	1.42631	1.63659	1.6908	1.76046	1.58442	0.18822	0.339307	0.329377
		6.52	1.71655	1.42681	1.63708	1.69132	1.75893	1.58478	0.187338	0.339266	0.328484
		6.52333	1.71712	1.42843	1.63701	1.69065	1.75976	1.58491	0.18688	0.3388	0.328741
		6.52667	1.71717	1.4266	1.63791	1.69055	1.75835	1.58377	0.186991	0.3381	0.328657
		6.53	1.71908	1.42745	1.63753	1.69208	1.75795	1.58141	0.185066	0.338282	0.329599
		6.53333	1.71864	1.42777	1.63708	1.69245	1.75739	1.58388	0.186398	0.3385	0.327935
		6.53667	1.71911	1.42778	1.63676	1.69284	1.75753	1.58325	0.187355	0.336972	0.328317
		6.54	1.71949	1.42741	1.63627	1.69393	1.75551	1.58458	0.188411	0.338021	0.328092
		6.54333	1.71885	1.42821	1.63593	1.69455	1.7565	1.58746	0.187753	0.338621	0.328659
		6.54667	1.71851	1.42628	1.63544	1.6957	1.75503	1.58798	0.188392	0.338251	0.327375
		6.55	1.71748	1.42694	1.63532	1.69629	1.75574	1.58753	0.188	0.33861	0.328744
		6.55333	1.71772	1.42775	1.63665	1.69812	1.75551	1.59008	0.188299	0.339203	0.329022
		6.55667	1.71796	1.42773	1.63663	1.69761	1.75575	1.59009	0.186262	0.338902	0.329384
		6.56	1.71862	1.4275	1.6362	1.69795	1.75359	1.58949	0.186146	0.339062	0.328385
		6.56333	1.71833	1.4293	1.63723	1.6945	1.75552	1.58978	0.186944	0.339412	0.330299
		6.56667	1.72004	1.42827	1.63676	1.69365	1.75271	1.58909	0.186681	0.338816	0.329479
		6.57	1.71932	1.42673	1.63576	1.69118	1.75504	1.58688	0.186511	0.338179	0.329628
		6.57333	1.71813	1.42843	1.63565	1.69181	1.75408	1.58702	0.187314	0.338763	0.328921
		6.57667	1.71786	1.42991	1.63604	1.69125	1.75616	1.58539	0.186863	0.338396	0.329189
		6.58	1.71732	1.42778	1.63499	1.69139	1.75558	1.58809	0.186691	0.339075	0.326666
		6.58333	1.71549	1.42785	1.63532	1.69163	1.7594	1.58963	0.186672	0.33853	0.327447
		6.58667	1.71572	1.42951	1.63448	1.69243	1.75821	1.58969	0.186536	0.340485	0.327068
		6.59	1.71689	1.42831	1.63498	1.69202	1.76019	1.58962	0.187203	0.339512	0.327964
		6.59333	1.71802	1.42803	1.63512	1.69194	1.75959	1.58991	0.18848	0.339467	0.327819
		6.59667	1.71992	1.42966	1.63563	1.69317	1.75961	1.58841	0.188127	0.339484	0.328142
		6.6	1.7206	1.42889	1.63619	1.69577	1.75836	1.58685	0.18778	0.338819	0.327472
		6.60333	1.72088	1.42904	1.63735	1.69627	1.75961	1.58669	0.18862	0.337683	0.326745
		6.60667	1.71986	1.4296	1.63811	1.69492	1.75902	1.58535	0.186655	0.338517	0.327518
		6.61	1.71869	1.42925	1.63827	1.69349	1.75951	1.58652	0.185828	0.338815	0.327138
		6.61333	1.71665	1.42872	1.63758	1.69749	1.75942	1.58505	0.18513	0.338272	0.32769
		6.61667	1.71622	1.43086	1.63684	1.6956	1.75965	1.58589	0.185272	0.33835	0.327755
		6.62	1.71543	1.4291	1.6366	1.69478	1.75954	1.58643	0.184852	0.337618	0.327508
		6.62333	1.7139	1.42765	1.63568	1.69709	1.76035	1.58642	0.185345	0.33724	0.327466
		6.62667	1.71515	1.42802	1.63431	1.69856	1.75982	1.5875	0.184899	0.335875	0.327264
		6.63	1.71576	1.429	1.63421	1.69525	1.76102	1.58787	0.183927	0.336181	0.326797
		6.63333	1.7146	1.42814	1.63565	1.69498	1.76113	1.58765	0.183588	0.337807	0.326863
		6.63667	1.71467	1.42983	1.63651	1.6961	1.76019	1.58766	0.183925	0.338435	0.327884
		6.64	1.71776	1.4303	1.63564	1.695	1.75852	1.58957	0.18474	0.338352	0.327618
		6.64333	1.71743	1.42934	1.63629	1.69804	1.75623	1.58828	0.184635	0.338342	0.327827
		6.64667	1.71791	1.42811	1.63626	1.6942	1.75431	1.59138	0.185761	0.3384	0.32815
		6.65	1.71982	1.4296	1.6355	1.69569	1.75456	1.59307	0.186746	0.336432	0.329587
		6.65333	1.72148	1.42725	1.63498	1.69574	1.75425	1.59284	0.183729	0.336369	0.328829
		6.65667	1.72039	1.4278	1.63583	1.69811	1.75428	1.59249	0.183062	0.33754	0.327938
[truncated: 19,152 more rows]
