# Supplementary material for: Evolution towards simplicity in bacterial small heat shock protein system
Source: eLife. 2023 Dec 8;12:RP89813. doi: 10.7554/eLife.89813 (PMC10708888; doi:10.7554/eLife.89813)
Supplement: Figure 6—source data 5. [file elife-89813-fig6-data5.xlsx]

## Sheet: Arkusz1
			Response [nm]
		time[min]	5uM IbpA E.amylovora H67Q D110G + Hsp70 repeat 1	5uM IbpA E.amylovora H67Q D110G + Hsp70 repeat 2	5uM IbpA E.amylovora H67Q D110G + Hsp70 repeat 3	5uM IbpA E.amylovora H67Q D110G -Hsp70 repeat 1	5uM IbpA E.amylovora H67Q D110G -Hsp70 repeat 2	5uM IbpA E.amylovora H67Q D110G - Hsp70 repeat 3	For data for 'No sHsp + Hsp70' see Fig. 6 - source data 4
		0	0.318612	0.310901	0.288776	0.428346	0.268108	0.873428
		0.003333	0.321924	0.30531	0.287873	0.430727	0.271176	0.873389
		0.006667	0.325216	0.306785	0.282929	0.429938	0.27722	0.869462
		0.01	0.324284	0.309	0.279183	0.432216	0.275891	0.865401
		0.013333	0.32475	0.310661	0.278461	0.434827	0.275437	0.864575
		0.016667	0.322713	0.313366	0.276208	0.436191	0.2767	0.856038
		0.02	0.321617	0.316052	0.271754	0.436105	0.276811	0.852732
		0.023333	0.31983	0.316658	0.271019	0.438455	0.273347	0.846125
		0.026667	0.322114	0.317968	0.270409	0.439314	0.278057	0.842531
		0.03	0.32242	0.318622	0.268754	0.439514	0.278211	0.835836
		0.033333	0.324343	0.317964	0.267272	0.439559	0.281148	0.832744
		0.036667	0.324969	0.321072	0.269113	0.440336	0.282374	0.826312
		0.04	0.32504	0.32161	0.267776	0.439945	0.287674	0.823506
		0.043333	0.323285	0.323819	0.265984	0.439597	0.286124	0.813787
		0.046667	0.322937	0.324084	0.262908	0.438123	0.289055	0.809834
		0.05	0.322336	0.323991	0.261452	0.438044	0.288486	0.807915
		0.053333	0.322195	0.322492	0.260583	0.436618	0.291605	0.806744
		0.056667	0.322925	0.322489	0.259996	0.435982	0.288116	0.804324
		0.06	0.323009	0.320704	0.261069	0.434333	0.286457	0.803497
		0.063333	0.322157	0.32023	0.261747	0.435018	0.284317	0.801211
		0.066667	0.32374	0.321065	0.260689	0.433411	0.286492	0.793044
		0.07	0.322843	0.318984	0.260298	0.433049	0.286926	0.788042
		0.073333	0.321584	0.319138	0.259004	0.432292	0.279586	0.780848
		0.076667	0.322488	0.318682	0.257939	0.431693	0.282705	0.774219
		0.08	0.323127	0.320362	0.257155	0.428903	0.290112	0.757806
		0.083333	0.322236	0.321352	0.257126	0.427391	0.280282	0.755235
		0.086667	0.323608	0.322705	0.255409	0.427802	0.285458	0.747757
		0.09	0.326884	0.324862	0.254334	0.426016	0.287492	0.743731
		0.093333	0.324928	0.323048	0.253181	0.425599	0.286859	0.736412
		0.096667	0.325161	0.32242	0.254443	0.424158	0.279441	0.739688
		0.1	0.324201	0.323307	0.254239	0.424774	0.281283	0.731829
		0.103333	0.323577	0.324945	0.254342	0.419682	0.270927	0.727469
		0.106667	0.321631	0.323572	0.255036	0.419689	0.278001	0.719094
		0.11	0.323617	0.324619	0.256187	0.4153	0.275106	0.715186
		0.113333	0.321711	0.324496	0.251936	0.414907	0.269342	0.708496
		0.116667	0.321839	0.323834	0.252673	0.412178	0.274541	0.703482
		0.12	0.32365	0.322635	0.252142	0.413531	0.275706	0.692314
		0.123333	0.321731	0.322208	0.252642	0.412066	0.274348	0.688116
		0.126667	0.320313	0.322882	0.251603	0.414265	0.273016	0.687869
		0.13	0.322079	0.324257	0.253543	0.41296	0.281019	0.678672
		0.133333	0.322464	0.321931	0.25248	0.412967	0.278068	0.671321
		0.136667	0.320393	0.323443	0.252224	0.413905	0.277473	0.664122
		0.14	0.320866	0.324606	0.250748	0.411356	0.275249	0.664666
		0.143333	0.320369	0.32373	0.250921	0.410643	0.280612	0.652453
		0.146667	0.320732	0.324218	0.250576	0.411206	0.276361	0.649693
		0.15	0.318343	0.326516	0.248999	0.410441	0.273949	0.648971
		0.153333	0.317255	0.325152	0.248463	0.407992	0.271428	0.651492
		0.156667	0.317937	0.324535	0.250738	0.408755	0.267366	0.639992
		0.16	0.317334	0.325736	0.250985	0.407271	0.261942	0.641012
		0.163333	0.31705	0.322756	0.251507	0.405385	0.262251	0.637175
		0.166667	0.318526	0.323435	0.252982	0.404556	0.263388	0.633781
		0.17	0.318802	0.324076	0.256187	0.404598	0.265775	0.626523
		0.173333	0.319048	0.321564	0.254902	0.402329	0.27122	0.627835
		0.176667	0.318306	0.320549	0.253121	0.401641	0.276599	0.62043
		0.18	0.316887	0.324224	0.254187	0.403402	0.277422	0.618184
		0.183333	0.316983	0.322965	0.256242	0.404215	0.277864	0.611611
		0.186667	0.315699	0.321341	0.252639	0.405675	0.277232	0.610706
		0.19	0.317362	0.324193	0.251633	0.406851	0.276799	0.603133
		0.193333	0.31869	0.325328	0.254635	0.408135	0.27082	0.600737
		0.196667	0.317177	0.324806	0.253931	0.405164	0.277999	0.596347
		0.2	0.316283	0.323335	0.253296	0.403581	0.277639	0.595111
		0.203333	0.318767	0.326488	0.256079	0.401518	0.2714	0.59328
		0.206667	0.315319	0.325029	0.256782	0.399481	0.27947	0.590219
		0.21	0.313469	0.32592	0.253652	0.39692	0.278983	0.585606
		0.213333	0.31357	0.324318	0.255066	0.398175	0.268966	0.582669
		0.216667	0.313557	0.325523	0.254462	0.397583	0.270159	0.581807
		0.22	0.311858	0.324059	0.25326	0.395875	0.271838	0.572661
		0.223333	0.311941	0.32618	0.254843	0.39608	0.2653	0.567791
		0.226667	0.31332	0.325027	0.256562	0.395564	0.265168	0.568173
		0.23	0.314291	0.324173	0.254923	0.390587	0.267346	0.568191
		0.233333	0.313485	0.326083	0.253718	0.390094	0.26671	0.564589
		0.236667	0.312578	0.3274	0.253823	0.390777	0.268768	0.56411
		0.24	0.312606	0.326321	0.252115	0.3897	0.265734	0.566846
		0.243333	0.312183	0.326818	0.251447	0.389472	0.265497	0.565041
		0.246667	0.310811	0.329035	0.252307	0.392182	0.266325	0.563106
		0.25	0.310699	0.329809	0.254123	0.391161	0.262935	0.558421
		0.253333	0.310968	0.32672	0.255181	0.389143	0.266107	0.559964
		0.256667	0.310085	0.325312	0.255412	0.388687	0.266	0.554917
		0.26	0.311459	0.326456	0.255709	0.387111	0.268455	0.551614
		0.263333	0.312292	0.324372	0.25519	0.385588	0.266232	0.552211
		0.266667	0.312295	0.321947	0.254027	0.383382	0.268175	0.553437
		0.27	0.311704	0.322563	0.253704	0.384373	0.266242	0.545038
		0.273333	0.31137	0.325313	0.254105	0.382385	0.265822	0.542495
		0.276667	0.30984	0.322276	0.255014	0.383234	0.261592	0.543263
		0.28	0.309838	0.321586	0.255572	0.382586	0.263009	0.534955
		0.283333	0.310103	0.32293	0.256024	0.383487	0.263653	0.531792
		0.286667	0.308979	0.323782	0.254905	0.381082	0.261072	0.534204
		0.29	0.310268	0.320901	0.256112	0.381933	0.259661	0.535715
		0.293333	0.311003	0.322972	0.25536	0.380592	0.263438	0.530596
		0.296667	0.309357	0.323401	0.253891	0.37897	0.262306	0.532089
		0.3	0.308819	0.321889	0.252922	0.377886	0.260269	0.527293
		0.303333	0.309302	0.322618	0.253923	0.378277	0.259674	0.529678
		0.306667	0.306468	0.323772	0.251688	0.377161	0.259998	0.526527
		0.31	0.304929	0.321475	0.251893	0.374747	0.26121	0.528242
		0.313333	0.305735	0.321869	0.252582	0.376445	0.262735	0.523741
		0.316667	0.306041	0.321536	0.256595	0.375394	0.263004	0.52483
		0.32	0.306706	0.321203	0.258378	0.374774	0.264635	0.520913
		0.323333	0.308153	0.321844	0.258675	0.374276	0.266954	0.522067
		0.326667	0.308927	0.321707	0.2578	0.37551	0.266141	0.522692
		0.33	0.309946	0.321258	0.259632	0.375599	0.264535	0.520032
		0.333333	0.311247	0.324681	0.254624	0.377235	0.265747	0.519257
		0.336667	0.312055	0.32312	0.252358	0.376954	0.267424	0.524247
		0.34	0.311278	0.322528	0.253543	0.376508	0.269645	0.520975
		0.343333	0.309801	0.323607	0.25281	0.375865	0.269315	0.511649
		0.346667	0.308839	0.326284	0.251231	0.373843	0.267711	0.514007
		0.35	0.305737	0.32204	0.253608	0.372337	0.270779	0.514791
		0.353333	0.30359	0.323795	0.253987	0.371424	0.273404	0.508692
		0.356667	0.30315	0.323407	0.254279	0.370633	0.272805	0.508852
		0.36	0.304324	0.324464	0.254087	0.369056	0.276425	0.511659
		0.363333	0.304478	0.32503	0.255124	0.36867	0.283987	0.510422
		0.366667	0.30348	0.326564	0.253139	0.366959	0.282943	0.510957
		0.37	0.305148	0.326671	0.25189	0.366076	0.286027	0.506659
		0.373333	0.305866	0.327798	0.252322	0.364407	0.288238	0.509613
		0.376667	0.304824	0.327149	0.255558	0.365247	0.28812	0.510768
		0.38	0.303028	0.324832	0.253803	0.363594	0.287041	0.507209
		0.383333	0.303477	0.326625	0.255618	0.364003	0.288898	0.498768
		0.386667	0.304209	0.326212	0.255806	0.361251	0.282654	0.501267
		0.39	0.303877	0.32592	0.254451	0.362251	0.281815	0.500737
		0.393333	0.303874	0.3271	0.250922	0.361397	0.281315	0.494183
		0.396667	0.304519	0.328184	0.251857	0.362004	0.279318	0.49493
		0.4	0.305864	0.327792	0.25147	0.36097	0.276244	0.497494
		0.403333	0.30432	0.328009	0.251435	0.363424	0.280111	0.496511
		0.406667	0.304694	0.327976	0.251414	0.36371	0.281746	0.488629
		0.41	0.303003	0.326375	0.254385	0.363507	0.279963	0.494435
		0.413333	0.303096	0.326332	0.254023	0.3626	0.281499	0.49161
		0.416667	0.303106	0.325773	0.253987	0.363054	0.283193	0.495379
		0.42	0.301802	0.325208	0.254858	0.360843	0.283621	0.493683
		0.423333	0.300953	0.327451	0.255876	0.358515	0.281927	0.496649
		0.426667	0.300735	0.329809	0.25443	0.358344	0.281935	0.492902
		0.43	0.302036	0.328517	0.255438	0.359702	0.278481	0.497296
		0.433333	0.302366	0.327418	0.257024	0.358264	0.279574	0.49188
		0.436667	0.304598	0.328978	0.259312	0.357166	0.280328	0.493115
		0.44	0.303511	0.327017	0.260142	0.357955	0.279368	0.493396
		0.443333	0.304826	0.326525	0.259453	0.35509	0.277393	0.49328
		0.446667	0.304512	0.327524	0.257699	0.352137	0.277281	0.487313
		0.45	0.302777	0.327836	0.256046	0.352481	0.275439	0.493276
		0.453333	0.299852	0.32702	0.252901	0.352395	0.272147	0.494273
		0.456667	0.301802	0.327801	0.251758	0.349776	0.271795	0.485241
		0.46	0.302353	0.325636	0.253397	0.351504	0.275759	0.488106
		0.463333	0.301235	0.323761	0.255441	0.351551	0.276852	0.492009
		0.466667	0.301482	0.325689	0.255048	0.350825	0.276249	0.485513
		0.47	0.302657	0.324288	0.25411	0.351716	0.278421	0.480461
		0.473333	0.303622	0.321873	0.254221	0.352689	0.274959	0.484681
		0.476667	0.303088	0.32378	0.252603	0.35161	0.271998	0.478675
		0.48	0.302526	0.324248	0.250525	0.351746	0.273377	0.477463
		0.483333	0.301522	0.32092	0.250658	0.350013	0.277928	0.477348
		0.486667	0.301782	0.321712	0.251513	0.349435	0.275871	0.47685
		0.49	0.300063	0.32109	0.250147	0.348778	0.279894	0.478731
		0.493333	0.29904	0.319075	0.250693	0.347716	0.28324	0.483073
		0.496667	0.29973	0.318274	0.253223	0.34714	0.282533	0.481619
		0.5	0	0.017819	0.035213	0.021423	0.004422	0.012988
		0.503333	0.002374	0	0.000709	0	0	0
		0.506667	0.011201	0.008498	0	0.0084	0.00331	0.002865
		0.51	0.009529	0.015778	0.011846	0.021068	0.016164	0.025216
		0.513333	0.039486	0.019599	0.041128	0.038355	0.030488	0.030917
		0.516667	0.048155	0.026667	0.045072	0.043981	0.040969	0.042008
		0.52	0.065813	0.039249	0.067218	0.062189	0.056633	0.063288
		0.523333	0.084873	0.052515	0.090184	0.081256	0.074719	0.091971
		0.526667	0.102989	0.068715	0.114791	0.100028	0.095016	0.114842
		0.53	0.118317	0.084947	0.134506	0.119789	0.113581	0.143595
		0.533333	0.135728	0.097448	0.157631	0.141779	0.133904	0.174044
		0.536667	0.153923	0.11419	0.179448	0.164767	0.153658	0.19954
		0.54	0.171535	0.12893	0.202637	0.185762	0.171739	0.225446
		0.543333	0.191344	0.142693	0.221834	0.206314	0.188663	0.253016
		0.546667	0.210966	0.158866	0.243793	0.226901	0.208121	0.277762
		0.55	0.228219	0.176211	0.266084	0.248129	0.226273	0.303262
		0.553333	0.243875	0.191839	0.291308	0.27049	0.244085	0.328417
		0.556667	0.263513	0.209895	0.311473	0.290496	0.261992	0.353168
		0.56	0.280329	0.22777	0.333182	0.312106	0.278452	0.379506
		0.563333	0.296229	0.243034	0.354724	0.332339	0.295573	0.405207
		0.566667	0.314571	0.256731	0.372067	0.35198	0.31409	0.428403
		0.57	0.32932	0.272088	0.390013	0.372406	0.330247	0.453029
		0.573333	0.34571	0.285588	0.407675	0.391725	0.345579	0.477375
		0.576667	0.361887	0.299651	0.426633	0.41113	0.360079	0.50044
		0.58	0.379662	0.313948	0.441367	0.430197	0.376473	0.523107
		0.583333	0.397131	0.32784	0.459942	0.44966	0.391581	0.54558
		0.586667	0.414332	0.341842	0.479938	0.469307	0.407769	0.567303
		0.59	0.432698	0.357432	0.496498	0.48839	0.422264	0.588512
		0.593333	0.452613	0.371228	0.511871	0.505259	0.439044	0.611542
		0.596667	0.468402	0.387036	0.528776	0.521405	0.450654	0.632352
		0.6	0.485216	0.400286	0.542785	0.536617	0.464213	0.65025
		0.603333	0.500725	0.413751	0.557465	0.55602	0.475379	0.668499
		0.606667	0.516026	0.42635	0.57084	0.570133	0.485989	0.68696
		0.61	0.529372	0.439264	0.585277	0.587306	0.49576	0.703033
		0.613333	0.546762	0.451188	0.597104	0.604948	0.507147	0.722008
		0.616667	0.560156	0.464823	0.610712	0.621034	0.519508	0.742396
		0.62	0.574262	0.47729	0.62519	0.636931	0.533354	0.759151
		0.623333	0.588204	0.487481	0.638557	0.654401	0.549902	0.774914
		0.626667	0.602761	0.499017	0.650743	0.6675	0.564341	0.792661
		0.63	0.614359	0.510734	0.666274	0.679101	0.577676	0.807308
		0.633333	0.628523	0.523872	0.678382	0.693595	0.589022	0.822406
		0.636667	0.643303	0.53646	0.691543	0.706945	0.602777	0.837236
		0.64	0.65465	0.548267	0.704854	0.72038	0.611015	0.84969
		0.643333	0.669187	0.558677	0.716826	0.732647	0.621482	0.863403
		0.646667	0.682223	0.570519	0.727592	0.746024	0.633174	0.881019
		0.65	0.697343	0.578612	0.741223	0.757368	0.646554	0.893459
		0.653333	0.711177	0.590063	0.754443	0.768754	0.660203	0.907292
		0.656667	0.727291	0.600712	0.766012	0.77923	0.673295	0.921782
		0.66	0.739838	0.61074	0.775727	0.793103	0.682862	0.933952
		0.663333	0.752669	0.622916	0.785287	0.80483	0.694262	0.942493
		0.666667	0.761766	0.632865	0.792398	0.815827	0.70136	0.9549
		0.67	0.771726	0.641514	0.803219	0.828724	0.709081	0.964085
		0.673333	0.780432	0.651147	0.812691	0.837764	0.717537	0.97708
		0.676667	0.787871	0.659839	0.822847	0.844827	0.728729	0.986105
		0.68	0.795032	0.665744	0.831388	0.854118	0.735997	0.996203
		0.683333	0.807972	0.677032	0.841627	0.863244	0.74638	1.00727
		0.686667	0.818046	0.685627	0.851591	0.874501	0.757807	1.01967
		0.69	0.827172	0.69384	0.86002	0.884338	0.766148	1.026
		0.693333	0.837236	0.704913	0.867461	0.895287	0.770127	1.03808
		0.696667	0.8523	0.713658	0.875892	0.903895	0.776779	1.04874
		0.7	0.86178	0.720571	0.884238	0.913519	0.784922	1.05728
		0.703333	0.871436	0.731344	0.892015	0.921326	0.796187	1.06386
		0.706667	0.885015	0.740066	0.898797	0.929296	0.806567	1.07352
		0.71	0.898851	0.748948	0.907426	0.935767	0.818479	1.08214
		0.713333	0.902073	0.75776	0.914934	0.943799	0.827869	1.08958
		0.716667	0.909249	0.765515	0.924064	0.950121	0.834933	1.09738
		0.72	0.916176	0.770986	0.932822	0.96012	0.838839	1.10698
		0.723333	0.921149	0.777833	0.941173	0.968126	0.846435	1.11411
		0.726667	0.92787	0.785793	0.947521	0.976672	0.853286	1.12073
		0.73	0.941235	0.793408	0.956462	0.982854	0.858083	1.12837
		0.733333	0.949329	0.799877	0.961941	0.990813	0.862168	1.13509
		0.736667	0.960975	0.807009	0.96973	0.996281	0.867759	1.14038
		0.74	0.971749	0.814246	0.976798	1.00341	0.871947	1.14904
		0.743333	0.97805	0.820298	0.98538	1.00997	0.878602	1.15676
		0.746667	0.985038	0.827143	0.991177	1.0177	0.886919	1.16453
		0.75	0.993947	0.833364	0.997602	1.02427	0.897694	1.17121
		0.753333	1.00065	0.841068	1.00491	1.03142	0.910729	1.17914
		0.756667	1.00992	0.846655	1.01142	1.03677	0.920232	1.18491
		0.76	1.01875	0.853699	1.01761	1.04181	0.92812	1.19124
		0.763333	1.0254	0.85971	1.02229	1.04885	0.936108	1.19666
		0.766667	1.03418	0.866888	1.02746	1.05418	0.939799	1.20341
		0.77	1.04228	0.871333	1.03287	1.06274	0.947127	1.20809
		0.773333	1.04669	0.877084	1.03774	1.06774	0.953135	1.21365
		0.776667	1.0537	0.881076	1.04245	1.07404	0.956215	1.21865
		0.78	1.0595	0.887768	1.0481	1.07957	0.958165	1.22611
		0.783333	1.06259	0.891384	1.05302	1.08394	0.963204	1.22989
		0.786667	1.06867	0.897785	1.05763	1.08671	0.965785	1.23754
		0.79	1.07427	0.904857	1.06326	1.09299	0.969048	1.24255
		0.793333	1.08107	0.910356	1.0678	1.09849	0.9752	1.2486
		0.796667	1.08657	0.915189	1.07246	1.10351	0.980592	1.25307
		0.8	1.09541	0.921923	1.07811	1.10944	0.984645	1.25882
		0.803333	1.10143	0.926997	1.08301	1.11602	0.987407	1.2625
		0.806667	1.10879	0.93243	1.08767	1.11958	0.993588	1.26761
		0.81	1.11394	0.937319	1.09244	1.12443	1.00002	1.27113
		0.813333	1.12355	0.941444	1.0977	1.12756	1.00828	1.27698
		0.816667	1.12841	0.945456	1.10211	1.13193	1.0176	1.28241
		0.82	1.13317	0.951525	1.10876	1.13645	1.02289	1.28448
		0.823333	1.14124	0.955542	1.11267	1.14246	1.02506	1.28967
		0.826667	1.14949	0.961111	1.11741	1.14501	1.03013	1.294
		0.83	1.15317	0.967133	1.12183	1.1501	1.03254	1.29612
		0.833333	1.15981	0.973316	1.12645	1.15356	1.03216	1.30097
		0.836667	1.16439	0.978351	1.12979	1.15764	1.03719	1.30602
		0.84	1.1682	0.983508	1.1343	1.16111	1.04049	1.31054
		0.843333	1.16997	0.987178	1.13868	1.16586	1.04006	1.3169
		0.846667	1.17758	0.992029	1.14303	1.16874	1.04386	1.32073
		0.85	1.18132	0.995286	1.14699	1.17419	1.04928	1.32465
		0.853333	1.18837	0.998895	1.1518	1.17803	1.05461	1.33134
		0.856667	1.19235	1.00352	1.15473	1.18163	1.05942	1.33607
		0.86	1.1982	1.00768	1.15677	1.18603	1.06629	1.33998
		0.863333	1.20211	1.01101	1.16096	1.18973	1.07177	1.34518
		0.866667	1.20494	1.01543	1.1636	1.19334	1.077	1.34876
		0.87	1.20843	1.01972	1.16658	1.19613	1.08003	1.35246
		0.873333	1.21269	1.02311	1.16965	1.20032	1.08333	1.35636
		0.876667	1.21711	1.02775	1.17341	1.20364	1.08253	1.35889
		0.88	1.21928	1.03176	1.17473	1.20744	1.08184	1.36252
		0.883333	1.22637	1.03685	1.17951	1.20875	1.08191	1.36651
		0.886667	1.23102	1.03943	1.1833	1.21454	1.08957	1.36929
		0.89	1.23306	1.04454	1.18765	1.2173	1.09377	1.37298
		0.893333	1.23657	1.04743	1.1912	1.22088	1.10013	1.37695
		0.896667	1.24097	1.0522	1.19625	1.22471	1.10711	1.3813
		0.9	1.24455	1.05587	1.19868	1.22955	1.11541	1.38359
		0.903333	1.24899	1.05997	1.20208	1.23032	1.11971	1.38745
		0.906667	1.25399	1.06242	1.205	1.23482	1.12313	1.39023
		0.91	1.25875	1.06666	1.20841	1.23534	1.12556	1.39388
		0.913333	1.26168	1.06945	1.21068	1.23917	1.12693	1.39544
		0.916667	1.26555	1.0715	1.21375	1.24163	1.12715	1.40136
		0.92	1.26935	1.07642	1.21575	1.24892	1.12446	1.40296
		0.923333	1.2746	1.08068	1.22044	1.25157	1.1248	1.40452
		0.926667	1.27818	1.08296	1.22319	1.25511	1.12806	1.40833
		0.93	1.28501	1.08651	1.22747	1.25672	1.1308	1.41226
		0.933333	1.28642	1.09125	1.23007	1.25848	1.13457	1.414
		0.936667	1.29091	1.0941	1.23396	1.25636	1.13876	1.41871
		0.94	1.2944	1.09689	1.235	1.25896	1.14393	1.42282
		0.943333	1.29875	1.10054	1.23885	1.2616	1.14743	1.4242
		0.946667	1.30057	1.10427	1.24008	1.26371	1.14988	1.4255
		0.95	1.30561	1.10803	1.24376	1.2678	1.15255	1.42837
		0.953333	1.30598	1.11082	1.24708	1.27358	1.15231	1.43143
		0.956667	1.31	1.11342	1.25017	1.27678	1.15178	1.43289
		0.96	1.31286	1.11749	1.25127	1.2806	1.15179	1.43502
		0.963333	1.31888	1.11972	1.25418	1.2842	1.15346	1.43921
		0.966667	1.32006	1.1215	1.25797	1.28588	1.15507	1.4402
		0.97	1.32529	1.12415	1.26175	1.28871	1.15914	1.44067
		0.973333	1.32617	1.12699	1.26447	1.28904	1.16229	1.44482
		0.976667	1.32968	1.12968	1.26918	1.29145	1.16819	1.44788
		0.98	1.3312	1.13211	1.27222	1.29287	1.17217	1.44993
		0.983333	1.33516	1.13598	1.27435	1.29708	1.17487	1.45371
		0.986667	1.33769	1.13851	1.27563	1.29953	1.18002	1.46012
		0.99	1.34352	1.1424	1.2781	1.30215	1.18377	1.45967
		0.993333	1.34697	1.14451	1.27955	1.30269	1.18402	1.46004
		0.996667	1.34894	1.14925	1.28203	1.30597	1.18579	1.46313
		1	1.35509	1.15138	1.28399	1.30721	1.18692	1.46506
		1.00333	1.35786	1.15512	1.29008	1.30975	1.18964	1.46382
		1.00667	1.36054	1.15716	1.29214	1.31052	1.19278	1.4685
		1.01	1.36276	1.1591	1.29525	1.3157	1.20063	1.47307
		1.01333	1.36685	1.15974	1.29901	1.31578	1.20339	1.47522
		1.01667	1.36643	1.16246	1.3004	1.31696	1.20625	1.47677
		1.02	1.36869	1.16521	1.30006	1.31972	1.20335	1.48056
		1.02333	1.37105	1.16743	1.30325	1.32392	1.20773	1.4814
		1.02667	1.37329	1.17129	1.30595	1.32465	1.20612	1.48482
		1.03	1.37562	1.17394	1.30725	1.32902	1.20893	1.48512
		1.03333	1.38	1.17528	1.30961	1.33224	1.21026	1.48693
		1.03667	1.38247	1.1782	1.31207	1.33231	1.21578	1.48898
		1.04	1.38384	1.18168	1.31288	1.33449	1.21445	1.49133
		1.04333	1.38614	1.18292	1.3139	1.3371	1.21715	1.49382
		1.04667	1.38943	1.18557	1.3164	1.3389	1.21701	1.49626
		1.05	1.39331	1.18819	1.31905	1.34134	1.22088	1.50009
		1.05333	1.39541	1.18975	1.32011	1.34513	1.223	1.50078
		1.05667	1.39816	1.19141	1.32245	1.34677	1.22475	1.50167
		1.06	1.39894	1.19357	1.32506	1.34762	1.2236	1.50412
		1.06333	1.40136	1.19673	1.32676	1.34899	1.22556	1.50676
		1.06667	1.4033	1.19857	1.32766	1.34939	1.22664	1.50675
		1.07	1.40586	1.20023	1.33226	1.35161	1.22933	1.50907
		1.07333	1.40782	1.20257	1.33584	1.35222	1.23337	1.5118
		1.07667	1.41228	1.20574	1.33787	1.3548	1.2363	1.5099
		1.08	1.41382	1.20767	1.33878	1.35622	1.24189	1.5109
		1.08333	1.41648	1.2105	1.34241	1.35779	1.24247	1.51358
		1.08667	1.42055	1.21311	1.3433	1.35716	1.24731	1.51515
		1.09	1.42374	1.21547	1.34502	1.36176	1.24718	1.51698
		1.09333	1.42556	1.21614	1.34602	1.36397	1.24895	1.5194
		1.09667	1.42728	1.21866	1.34925	1.36617	1.24909	1.52128
		1.1	1.4264	1.22106	1.35102	1.36983	1.25239	1.52141
		1.10333	1.43011	1.22219	1.35351	1.37412	1.25453	1.52198
		1.10667	1.4285	1.22315	1.35446	1.37352	1.25731	1.52299
		1.11	1.431	1.22698	1.35684	1.37565	1.25765	1.5253
		1.11333	1.43589	1.22761	1.35903	1.37774	1.26276	1.52674
		1.11667	1.43992	1.2294	1.36049	1.37824	1.26621	1.53184
		1.12	1.43985	1.23151	1.36342	1.38085	1.2675	1.53323
		1.12333	1.44399	1.23408	1.36599	1.38161	1.26892	1.53561
		1.12667	1.44714	1.23528	1.36622	1.38237	1.27493	1.53669
		1.13	1.4485	1.23819	1.36791	1.38516	1.27255	1.54001
		1.13333	1.44911	1.2399	1.36854	1.38686	1.27454	1.53975
		1.13667	1.45249	1.24289	1.36782	1.38829	1.27638	1.54189
		1.14	1.45474	1.24573	1.36733	1.39108	1.2799	1.54297
		1.14333	1.45473	1.2465	1.37095	1.39293	1.27836	1.5459
		1.14667	1.45536	1.248	1.37184	1.39328	1.28215	1.54482
		1.15	1.45729	1.24979	1.37423	1.39522	1.2852	1.5474
		1.15333	1.45782	1.25033	1.37645	1.39739	1.28603	1.5513
		1.15667	1.45922	1.25123	1.37807	1.39938	1.28307	1.55283
		1.16	1.4629	1.25426	1.37746	1.39919	1.28875	1.55335
		1.16333	1.46626	1.25495	1.38004	1.3999	1.28974	1.55691
		1.16667	1.46953	1.25678	1.38002	1.40074	1.29053	1.55535
		1.17	1.4735	1.25874	1.38257	1.40215	1.29082	1.5569
		1.17333	1.47605	1.25944	1.38393	1.40468	1.29554	1.56136
		1.17667	1.4791	1.26188	1.3866	1.40827	1.29606	1.56234
		1.18	1.47736	1.2651	1.38506	1.41163	1.29621	1.56203
		1.18333	1.4772	1.26739	1.38773	1.41293	1.2969	1.56628
		1.18667	1.47859	1.26865	1.38836	1.41306	1.30126	1.56874
		1.19	1.47904	1.27167	1.39162	1.4135	1.30382	1.56615
		1.19333	1.47605	1.27359	1.39218	1.41354	1.30628	1.56727
		1.19667	1.4822	1.27549	1.39592	1.41419	1.30857	1.56788
		1.2	1.48636	1.27605	1.39765	1.41724	1.31356	1.57008
		1.20333	1.48811	1.27918	1.39812	1.41792	1.31318	1.56879
		1.20667	1.49078	1.2807	1.39886	1.41934	1.31497	1.57062
		1.21	1.49742	1.28188	1.40199	1.4207	1.31544	1.57047
		1.21333	1.49651	1.28288	1.40316	1.42298	1.32102	1.5727
		1.21667	1.49665	1.2857	1.40573	1.42188	1.3189	1.57173
		1.22	1.49381	1.28582	1.40776	1.42395	1.32284	1.57296
		1.22333	1.49555	1.2875	1.41009	1.42484	1.32549	1.57519
		1.22667	1.49506	1.28918	1.41001	1.42651	1.3293	1.57857
		1.23	1.49607	1.29094	1.41107	1.42433	1.3278	1.5811
		1.23333	1.49924	1.29316	1.41036	1.42781	1.32992	1.58349
		1.23667	1.50393	1.29505	1.41298	1.4295	1.33027	1.58446
		1.24	1.50643	1.29722	1.41229	1.43023	1.32953	1.58483
		1.24333	1.50794	1.29861	1.41525	1.43057	1.32825	1.58675
		1.24667	1.51019	1.30019	1.41634	1.43411	1.32865	1.58898
		1.25	1.50869	1.30099	1.41955	1.43531	1.32949	1.5879
		1.25333	1.50937	1.30297	1.42032	1.43686	1.32988	1.58998
		1.25667	1.51008	1.30369	1.42307	1.43807	1.33219	1.59328
		1.26	1.51371	1.30532	1.42421	1.43922	1.33426	1.59446
		1.26333	1.51372	1.3073	1.42522	1.43962	1.33559	1.59356
		1.26667	1.51669	1.30799	1.42484	1.43938	1.33702	1.5977
		1.27	1.51788	1.30922	1.42664	1.4409	1.3414	1.59802
		1.27333	1.51975	1.31178	1.42824	1.44096	1.34373	1.59787
		1.27667	1.51831	1.31331	1.43133	1.44235	1.3446	1.59773
		1.28	1.52221	1.31348	1.43256	1.44368	1.3471	1.59915
		1.28333	1.52457	1.31429	1.43495	1.44459	1.34786	1.59788
		1.28667	1.52615	1.31588	1.43537	1.44383	1.34625	1.59846
		1.29	1.52884	1.31706	1.43822	1.44769	1.34628	1.59983
		1.29333	1.53283	1.31906	1.43592	1.44939	1.34627	1.60048
		1.29667	1.5341	1.32102	1.43756	1.4509	1.3485	1.6018
		1.3	1.53473	1.32418	1.43755	1.45126	1.34842	1.60474
		1.30333	1.53834	1.32564	1.44167	1.45371	1.34993	1.6086
		1.30667	1.53892	1.32654	1.43938	1.45307	1.35048	1.60989
		1.31	1.53924	1.32765	1.44231	1.45281	1.35194	1.61057
		1.31333	1.54149	1.3287	1.44151	1.45343	1.35196	1.61406
		1.31667	1.54161	1.32845	1.44323	1.45648	1.35553	1.61359
		1.32	1.53996	1.32972	1.44316	1.45616	1.35771	1.61248
		1.32333	1.5438	1.33113	1.44797	1.45799	1.35868	1.61332
		1.32667	1.54219	1.33247	1.44789	1.45958	1.36086	1.61439
		1.33	1.54093	1.33338	1.45215	1.45997	1.36179	1.6127
		1.33333	1.54335	1.33611	1.45427	1.4604	1.36102	1.61404
		1.33667	1.54474	1.33807	1.45424	1.4608	1.36227	1.61506
		1.34	1.54624	1.33815	1.45326	1.46145	1.36548	1.61576
		1.34333	1.54867	1.33918	1.45333	1.46165	1.36677	1.61707
		1.34667	1.54985	1.34112	1.45458	1.46255	1.36787	1.61735
		1.35	1.54943	1.34186	1.45577	1.46208	1.37033	1.61841
		1.35333	1.55325	1.3433	1.45653	1.46375	1.37261	1.62047
		1.35667	1.55351	1.3455	1.45846	1.46603	1.37256	1.62345
		1.36	1.55661	1.34713	1.46062	1.46955	1.37204	1.62503
		1.36333	1.5579	1.34815	1.46099	1.47138	1.37117	1.62814
		1.36667	1.5618	1.34894	1.4609	1.47349	1.37264	1.62716
		1.37	1.56117	1.34867	1.46359	1.47435	1.37288	1.62955
		1.37333	1.56126	1.35059	1.46169	1.47507	1.37421	1.62909
		1.37667	1.56157	1.35035	1.46418	1.47039	1.37811	1.62835
		1.38	1.56488	1.35083	1.46319	1.47306	1.38033	1.62934
		1.38333	1.56857	1.35243	1.46552	1.47391	1.37898	1.63201
		1.38667	1.56974	1.35454	1.4658	1.47514	1.37953	1.63038
		1.39	1.57236	1.35492	1.46993	1.47489	1.38025	1.63205
		1.39333	1.57518	1.35725	1.46936	1.48028	1.37781	1.63397
		1.39667	1.57723	1.35978	1.47107	1.47884	1.37813	1.63516
		1.4	1.57798	1.36204	1.47009	1.4791	1.37936	1.63354
		1.40333	1.57766	1.36233	1.47105	1.48009	1.37925	1.63712
		1.40667	1.57531	1.36499	1.47132	1.48169	1.38065	1.63706
		1.41	1.57505	1.3651	1.47188	1.48302	1.38057	1.63697
		1.41333	1.57496	1.36638	1.47374	1.48341	1.38338	1.63572
		1.41667	1.57489	1.36709	1.47473	1.48517	1.38549	1.63823
		1.42	1.57871	1.3685	1.47617	1.48395	1.38721	1.6363
		1.42333	1.58181	1.36836	1.47781	1.48399	1.38834	1.63754
		1.42667	1.58454	1.37057	1.47984	1.48583	1.3919	1.63876
		1.43	1.58299	1.37091	1.48055	1.48769	1.38972	1.63886
		1.43333	1.58398	1.37158	1.48164	1.48772	1.38955	1.64209
		1.43667	1.58436	1.37295	1.48327	1.48911	1.38925	1.64374
		1.44	1.58406	1.37279	1.48359	1.49084	1.38965	1.64411
		1.44333	1.58243	1.37327	1.48521	1.49057	1.39002	1.64417
		1.44667	1.58522	1.37449	1.4866	1.49112	1.39376	1.64764
		1.45	1.58574	1.37488	1.48901	1.49175	1.39388	1.6467
		1.45333	1.58653	1.37689	1.48706	1.49322	1.39503	1.6485
		1.45667	1.58926	1.37848	1.48925	1.49379	1.39477	1.64972
		1.46	1.59245	1.37894	1.48776	1.49327	1.39682	1.65217
		1.46333	1.59464	1.38007	1.48912	1.49413	1.39704	1.6501
		1.46667	1.59784	1.38327	1.48976	1.49531	1.39982	1.65026
		1.47	1.6002	1.38274	1.49163	1.49696	1.40251	1.64916
		1.47333	1.59999	1.38469	1.48939	1.49862	1.40583	1.64864
		1.47667	1.59836	1.38725	1.49297	1.49921	1.40487	1.64935
		1.48	1.60156	1.38769	1.49496	1.49898	1.4048	1.65136
		1.48333	1.5996	1.38753	1.49583	1.49985	1.40533	1.65195
		1.48667	1.60172	1.38868	1.49611	1.49937	1.40426	1.65536
		1.49	1.60503	1.38937	1.49969	1.49882	1.40586	1.65833
		1.49333	1.60708	1.38885	1.49924	1.50093	1.40779	1.65805
		1.49667	1.60772	1.38885	1.49842	1.50265	1.41061	1.65791
		1.5	1.60643	1.38989	1.49763	1.50423	1.41168	1.65989
		1.50333	1.60591	1.3911	1.50026	1.50511	1.41512	1.65942
		1.50667	1.6071	1.39082	1.49984	1.50695	1.4124	1.65961
		1.51	1.60743	1.39156	1.50247	1.50545	1.41253	1.66276
		1.51333	1.60579	1.39371	1.50185	1.50601	1.41246	1.66361
		1.51667	1.60918	1.39501	1.5038	1.50643	1.41435	1.66306
		1.52	1.60682	1.39613	1.50333	1.50746	1.41341	1.66277
		1.52333	1.60721	1.39853	1.50486	1.50646	1.41651	1.66243
		1.52667	1.60859	1.40168	1.50394	1.50848	1.41675	1.6625
		1.53	1.60864	1.4016	1.5053	1.50923	1.41691	1.66323
		1.53333	1.61069	1.40185	1.50418	1.50985	1.41651	1.66417
		1.53667	1.61368	1.40225	1.50612	1.51075	1.4184	1.66481
		1.54	1.61365	1.40322	1.50672	1.51236	1.4186	1.66711
		1.54333	1.61839	1.40334	1.50901	1.51324	1.42091	1.66572
		1.54667	1.62071	1.40457	1.5111	1.51345	1.42231	1.66502
		1.55	1.62333	1.4053	1.51366	1.51354	1.42252	1.66519
		1.55333	1.62493	1.40593	1.51306	1.51473	1.42303	1.66532
		1.55667	1.62667	1.40721	1.51342	1.51608	1.42341	1.66526
		1.56	1.62469	1.4073	1.51253	1.51719	1.42505	1.66792
		1.56333	1.62232	1.40832	1.51296	1.51725	1.42716	1.67194
		1.56667	1.61923	1.40994	1.51406	1.51735	1.42817	1.67414
		1.57	1.62112	1.41105	1.51596	1.51715	1.42717	1.67566
		1.57333	1.62302	1.4104	1.51817	1.51953	1.4287	1.67371
		1.57667	1.62397	1.41335	1.51911	1.52037	1.42719	1.67332
		1.58	1.62816	1.4132	1.52115	1.52181	1.42598	1.67488
		1.58333	1.62932	1.41341	1.52235	1.52346	1.42614	1.67397
		1.58667	1.62972	1.41512	1.52246	1.52458	1.42796	1.67586
		1.59	1.63021	1.417	1.52274	1.5232	1.42948	1.67815
		1.59333	1.63165	1.41621	1.52239	1.52257	1.42953	1.67619
		1.59667	1.63259	1.41872	1.52228	1.52212	1.42888	1.67302
		1.6	1.63431	1.42098	1.52215	1.5218	1.43271	1.67493
		1.60333	1.6342	1.421	1.52252	1.52293	1.43346	1.67362
		1.60667	1.63277	1.42114	1.52161	1.52418	1.43374	1.67647
		1.61	1.63313	1.42137	1.52468	1.52497	1.43483	1.68078
		1.61333	1.63299	1.41957	1.52566	1.52556	1.43679	1.68332
		1.61667	1.63457	1.41953	1.52719	1.52642	1.43565	1.68229
		1.62	1.63599	1.42004	1.52704	1.52769	1.43763	1.68343
		1.62333	1.63685	1.42163	1.52992	1.52696	1.43873	1.68274
		1.62667	1.63755	1.42344	1.53018	1.52744	1.43965	1.68372
		1.63	1.63867	1.42712	1.53032	1.52795	1.43991	1.68286
		1.63333	1.64118	1.42691	1.529	1.52769	1.43825	1.68473
		1.63667	1.6422	1.42807	1.5305	1.52619	1.43754	1.68629
		1.64	1.64433	1.42898	1.53013	1.5267	1.43913	1.68737
		1.64333	1.64601	1.42977	1.52927	1.52819	1.44178	1.68717
		1.64667	1.64453	1.43016	1.52903	1.52897	1.44498	1.6882
		1.65	1.64324	1.43175	1.53047	1.52901	1.44791	1.6904
		1.65333	1.64383	1.43303	1.53152	1.53139	1.45041	1.68823
		1.65667	1.64476	1.43397	1.53306	1.53273	1.44733	1.68649
		1.66	1.64373	1.43423	1.53282	1.53374	1.44471	1.6881
		1.66333	1.64641	1.43372	1.53482	1.53297	1.44282	1.6913
		1.66667	1.64582	1.43502	1.53456	1.53595	1.44166	1.68994
		1.67	1.6457	1.43597	1.53554	1.53588	1.44203	1.69207
		1.67333	1.64592	1.43733	1.53544	1.53557	1.44558	1.69426
		1.67667	1.64633	1.43885	1.53879	1.53429	1.44719	1.69351
		1.68	1.64585	1.44068	1.53702	1.5362	1.44975	1.69163
		1.68333	1.64785	1.44111	1.53967	1.53644	1.45089	1.69226
		1.68667	1.65273	1.44077	1.54052	1.53552	1.45235	1.69554
		1.69	1.65295	1.44091	1.54218	1.53681	1.45141	1.69477
		1.69333	1.65429	1.44157	1.54192	1.53777	1.45431	1.69667
		1.69667	1.65685	1.44214	1.54308	1.53789	1.45465	1.69767
		1.7	1.65941	1.44275	1.54302	1.537	1.45807	1.70039
		1.70333	1.65794	1.44511	1.54405	1.53823	1.45642	1.69857
		1.70667	1.66018	1.44547	1.54278	1.53874	1.45854	1.69873
		1.71	1.66069	1.44397	1.54225	1.5385	1.4594	1.69961
		1.71333	1.65945	1.4454	1.54267	1.54085	1.45966	1.70129
		1.71667	1.65834	1.44569	1.54349	1.54104	1.46017	1.69908
		1.72	1.65879	1.44587	1.54222	1.54282	1.46103	1.69813
		1.72333	1.65813	1.44624	1.54386	1.54231	1.45987	1.69885
		1.72667	1.66087	1.44928	1.54485	1.54512	1.46005	1.69838
		1.73	1.66338	1.44953	1.54679	1.54467	1.45878	1.69814
		1.73333	1.66339	1.44965	1.54624	1.5475	1.46014	1.6995
		1.73667	1.66299	1.45147	1.54789	1.54621	1.46061	1.70123
		1.74	1.66382	1.45284	1.54859	1.54776	1.4632	1.70289
		1.74333	1.6603	1.45179	1.54938	1.54733	1.46316	1.70188
		1.74667	1.6609	1.45219	1.55039	1.54787	1.46285	1.70269
		1.75	1.66215	1.4528	1.55098	1.54535	1.46225	1.70242
		1.75333	1.66254	1.45266	1.55029	1.54611	1.46266	1.70409
		1.75667	1.66275	1.45315	1.55112	1.54628	1.46231	1.70566
		1.76	1.6674	1.45471	1.55071	1.54583	1.46196	1.70849
		1.76333	1.66652	1.45477	1.55231	1.54781	1.46641	1.70733
		1.76667	1.66883	1.456	1.5521	1.54928	1.46476	1.7087
		1.77	1.66947	1.45648	1.55395	1.55112	1.46874	1.70823
		1.77333	1.67192	1.45747	1.55559	1.55059	1.47151	1.70755
		1.77667	1.67307	1.45835	1.55679	1.55233	1.47329	1.70634
		1.78	1.67666	1.45921	1.55593	1.55077	1.47441	1.70875
		1.78333	1.67684	1.46023	1.55767	1.55159	1.4763	1.70988
		1.78667	1.6798	1.45994	1.55814	1.55119	1.47422	1.70954
		1.79	1.68046	1.4604	1.55646	1.55372	1.47276	1.71028
		1.79333	1.68085	1.46168	1.55632	1.55392	1.4723	1.70957
		1.79667	1.68071	1.46177	1.55711	1.55422	1.46967	1.70929
		1.8	1.68138	1.46324	1.55799	1.55417	1.47048	1.70648
		1.80333	1.68042	1.4637	1.55834	1.5555	1.47086	1.70929
		1.80667	1.67925	1.46415	1.56014	1.55407	1.47269	1.70817
		1.81	1.67901	1.4637	1.56226	1.55407	1.47337	1.70911
		1.81333	1.67687	1.46403	1.56092	1.55382	1.47645	1.70888
		1.81667	1.67737	1.46444	1.56228	1.55392	1.47707	1.71089
		1.82	1.67999	1.46585	1.56286	1.55366	1.47814	1.70984
		1.82333	1.68256	1.46651	1.56361	1.55464	1.47854	1.71303
		1.82667	1.68288	1.46739	1.56092	1.55512	1.48042	1.71389
		1.83	1.68465	1.47	1.56441	1.55721	1.48085	1.71508
		1.83333	1.68644	1.4705	1.56473	1.55919	1.48027	1.71537
		1.83667	1.6855	1.47028	1.5673	1.55932	1.48265	1.71641
		1.84	1.68629	1.46996	1.5666	1.56012	1.48361	1.71485
		1.84333	1.68802	1.4712	1.57023	1.56065	1.48483	1.7143
		1.84667	1.69145	1.47166	1.56928	1.56013	1.48336	1.71534
		1.85	1.68954	1.47301	1.56839	1.55936	1.48613	1.71587
		1.85333	1.69037	1.47464	1.56723	1.56156	1.4839	1.71513
		1.85667	1.68925	1.47545	1.56891	1.56371	1.48358	1.71655
		1.86	1.68802	1.47564	1.56934	1.56385	1.48171	1.71739
		1.86333	1.68578	1.47538	1.57003	1.56476	1.48286	1.71844
		1.86667	1.6856	1.47415	1.57081	1.56546	1.48294	1.72058
		1.87	1.68679	1.47396	1.56979	1.56463	1.48516	1.7193
		1.87333	1.68624	1.47601	1.56987	1.56516	1.48581	1.71899
		1.87667	1.68932	1.47721	1.56977	1.56394	1.48822	1.72141
		1.88	1.6946	1.4778	1.56848	1.56484	1.48828	1.7228
		1.88333	1.69823	1.48002	1.56931	1.56365	1.48662	1.72218
		1.88667	1.69905	1.48103	1.57222	1.56393	1.48757	1.72571
		1.89	1.70143	1.48072	1.57254	1.56405	1.48905	1.72556
		1.89333	1.69874	1.47989	1.57209	1.56611	1.48918	1.72263
		1.89667	1.69527	1.48075	1.57369	1.56625	1.4916	1.7211
		1.9	1.6927	1.48065	1.57365	1.56773	1.49331	1.72147
		1.90333	1.6936	1.48	1.57298	1.56839	1.49236	1.71955
		1.90667	1.69388	1.48065	1.57263	1.56752	1.49223	1.72074
		1.91	1.69708	1.48139	1.57478	1.56834	1.49184	1.72286
		1.91333	1.69796	1.48212	1.57518	1.56858	1.4903	1.72315
		1.91667	1.69956	1.48227	1.57577	1.57089	1.4918	1.72499
		1.92	1.69911	1.48349	1.57704	1.56938	1.49136	1.72855
		1.92333	1.70053	1.48309	1.57991	1.56998	1.49188	1.72836
		1.92667	1.69821	1.48459	1.57954	1.57238	1.49227	1.72818
		1.93	1.69948	1.48406	1.58036	1.57049	1.4942	1.72781
		1.93333	1.69961	1.48517	1.58123	1.56936	1.49415	1.72801
		1.93667	1.7006	1.48621	1.58144	1.57222	1.49624	1.72589
		1.94	1.70331	1.48809	1.58204	1.57298	1.49897	1.72691
		1.94333	1.70594	1.48909	1.58452	1.5718	1.50125	1.72866
		1.94667	1.70764	1.49031	1.5857	1.57277	1.50075	1.72912
		1.95	1.70755	1.48962	1.58645	1.57384	1.50124	1.72667
		1.95333	1.71039	1.48985	1.58589	1.57297	1.50029	1.72756
		1.95667	1.7092	1.48813	1.58533	1.57306	1.49675	1.72705
		1.96	1.70785	1.48828	1.58275	1.57254	1.4977	1.72747
		1.96333	1.70748	1.48912	1.58193	1.57466	1.49794	1.72861
		1.96667	1.70895	1.48972	1.58038	1.57439	1.49896	1.73026
		1.97	1.70813	1.49044	1.58079	1.57539	1.4999	1.73213
		1.97333	1.70888	1.49327	1.57828	1.57532	1.50101	1.73493
		1.97667	1.70999	1.49219	1.58117	1.57629	1.49931	1.73529
		1.98	1.7106	1.49237	1.58228	1.57666	1.501	1.734
		1.98333	1.71153	1.49311	1.58547	1.57783	1.50129	1.73567
		1.98667	1.71153	1.49312	1.58558	1.57812	1.50181	1.73622
		1.99	1.71094	1.4937	1.58904	1.57873	1.50516	1.73396
		1.99333	1.71183	1.49559	1.58896	1.57847	1.50661	1.73453
		1.99667	1.71327	1.49638	1.58866	1.57834	1.50706	1.7365
		2	1.71316	1.49726	1.58723	1.57749	1.50761	1.73605
		2.00333	1.71125	1.49796	1.58752	1.57727	1.50537	1.73544
		2.00667	1.71132	1.49773	1.58827	1.57806	1.50494	1.73643
		2.01	1.71124	1.49737	1.58765	1.57771	1.50482	1.7363
		2.01333	1.709	1.49775	1.5883	1.57768	1.50296	1.73717
		2.01667	1.70879	1.4978	1.58967	1.57861	1.50274	1.73697
		2.02	1.71047	1.49854	1.58903	1.57901	1.50697	1.73766
		2.02333	1.71077	1.49926	1.58904	1.57841	1.507	1.7413
		2.02667	1.70868	1.50065	1.58966	1.57891	1.50628	1.74212
		2.03	1.71016	1.50088	1.58982	1.58075	1.51128	1.73878
		2.03333	1.71111	1.50175	1.59	1.58206	1.51077	1.73956
		2.03667	1.71121	1.50148	1.59197	1.58217	1.51157	1.73964
		2.04	1.71194	1.50206	1.59178	1.58213	1.51083	1.7383
		2.04333	1.71363	1.50255	1.59325	1.58439	1.51123	1.7373
		2.04667	1.71133	1.50267	1.59195	1.58317	1.5083	1.74055
		2.05	1.71111	1.50478	1.59187	1.58247	1.50838	1.73955
		2.05333	1.71392	1.50516	1.59242	1.58229	1.50531	1.73986
		2.05667	1.71285	1.50616	1.59436	1.58365	1.50608	1.73884
		2.06	1.71295	1.5072	1.59255	1.58289	1.50917	1.74101
		2.06333	1.71289	1.50705	1.59549	1.58233	1.51343	1.74053
		2.06667	1.71102	1.506	1.59821	1.58246	1.51351	1.74292
		2.07	1.70968	1.50835	1.60101	1.58353	1.51409	1.74158
		2.07333	1.70917	1.50748	1.59945	1.58315	1.51393	1.74385
		2.07667	1.71038	1.50794	1.60129	1.58311	1.51359	1.74243
		2.08	1.71202	1.51082	1.60173	1.58472	1.5133	1.74445
		2.08333	1.71384	1.51231	1.60127	1.58546	1.51522	1.74298
		2.08667	1.71284	1.51092	1.59946	1.58665	1.51731	1.74392
		2.09	1.71521	1.51198	1.60079	1.58656	1.52118	1.74431
		2.09333	1.71441	1.51215	1.60318	1.58812	1.52319	1.74483
		2.09667	1.71409	1.51235	1.60262	1.58921	1.52166	1.74391
		2.1	1.71333	1.51051	1.60099	1.5888	1.52148	1.74454
		2.10333	1.71616	1.51099	1.60216	1.58714	1.52512	1.74457
		2.10667	1.71568	1.5114	1.60164	1.58861	1.5202	1.74245
		2.11	1.71639	1.51131	1.59953	1.58929	1.51939	1.74127
		2.11333	1.71948	1.51005	1.59994	1.58667	1.52076	1.74194
		2.11667	1.71986	1.51215	1.60286	1.58863	1.52178	1.74146
		2.12	1.71831	1.51259	1.60166	1.58905	1.52041	1.7434
		2.12333	1.7192	1.51174	1.60362	1.58919	1.52318	1.74243
		2.12667	1.71846	1.51113	1.60621	1.58792	1.52318	1.74432
		2.13	1.7157	1.51239	1.60744	1.58891	1.52242	1.74525
		2.13333	1.71651	1.5116	1.60674	1.58863	1.5244	1.74676
		2.13667	1.71445	1.51306	1.60829	1.59124	1.52366	1.74589
		2.14	1.71365	1.51546	1.60759	1.59216	1.52633	1.74668
		2.14333	1.71497	1.51539	1.60755	1.59441	1.52662	1.74577
		2.14667	1.71655	1.51608	1.60771	1.59682	1.52689	1.74629
		2.15	1.71605	1.51783	1.60764	1.59476	1.52537	1.74518
		2.15333	1.71801	1.51783	1.60759	1.59287	1.52529	1.74663
		2.15667	1.71885	1.51869	1.60915	1.59259	1.52379	1.74914
		2.16	1.71844	1.5203	1.60692	1.59049	1.52672	1.75122
		2.16333	1.71834	1.5209	1.60749	1.59079	1.52787	1.74807
		2.16667	1.71962	1.52004	1.60715	1.5945	1.52761	1.75043
		2.17	1.71937	1.52078	1.6092	1.59483	1.52759	1.75024
		2.17333	1.71946	1.5199	1.60889	1.59558	1.52999	1.7494
		2.17667	1.72153	1.52045	1.61135	1.59701	1.52808	1.74869
		2.18	1.72267	1.5205	1.6106	1.59655	1.52627	1.75262
		2.18333	1.72358	1.52139	1.6116	1.59468	1.5293	1.75283
		2.18667	1.72437	1.5221	1.61175	1.59497	1.52839	1.75356
		2.19	1.72383	1.52305	1.61236	1.59283	1.52615	1.75314
		2.19333	1.72287	1.52341	1.61113	1.5923	1.52379	1.75477
		2.19667	1.72235	1.52188	1.61338	1.59206	1.52432	1.7546
		2.2	1.72037	1.52326	1.61465	1.59117	1.52206	1.75491
		2.20333	1.7188	1.52433	1.61338	1.59234	1.5238	1.75573
		2.20667	1.71941	1.52452	1.61199	1.59446	1.52645	1.7561
		2.21	1.71745	1.5254	1.61399	1.59613	1.52907	1.75623
		2.21333	1.72027	1.52797	1.61298	1.59544	1.52863	1.75635
		2.21667	1.724	1.52833	1.61312	1.59671	1.53115	1.75782
		2.22	1.72645	1.52746	1.6138	1.59652	1.53105	1.75916
		2.22333	1.7271	1.52757	1.61571	1.59716	1.5273	1.75949
		2.22667	1.72915	1.5274	1.61439	1.59713	1.52816	1.75873
		2.23	1.72794	1.52773	1.61485	1.59884	1.53099	1.76067
		2.23333	1.72587	1.52797	1.61291	1.59958	1.52958	1.7611
		2.23667	1.72624	1.52797	1.61261	1.59908	1.53252	1.7592
		2.24	1.72648	1.52968	1.61236	1.59759	1.53763	1.7597
		2.24333	1.72628	1.52979	1.61422	1.59589	1.53666	1.76126
		2.24667	1.72786	1.53093	1.61481	1.59645	1.53921	1.76217
		2.25	1.72953	1.53058	1.61695	1.59753	1.53987	1.76119
		2.25333	1.72853	1.533	1.61623	1.5996	1.5406	1.76191
		2.25667	1.72917	1.53137	1.6167	1.60085	1.53682	1.76128
		2.26	1.72938	1.53191	1.61687	1.60228	1.53749	1.75994
		2.26333	1.72602	1.53064	1.61833	1.60259	1.53714	1.75885
		2.26667	1.72647	1.53229	1.61663	1.60151	1.53781	1.75861
		2.27	1.72568	1.53079	1.61789	1.60084	1.53825	1.75957
		2.27333	1.72548	1.53302	1.61918	1.60103	1.541	1.76237
		2.27667	1.72724	1.53376	1.6185	1.60234	1.5411	1.76356
		2.28	1.72873	1.53447	1.61665	1.6013	1.53993	1.76239
		2.28333	1.72674	1.5339	1.61763	1.60187	1.54128	1.7634
		2.28667	1.72978	1.53559	1.61747	1.6023	1.54136	1.76184
		2.29	1.7299	1.53602	1.61761	1.60185	1.54191	1.76155
		2.29333	1.7313	1.53675	1.62006	1.6019	1.54308	1.76304
		2.29667	1.73298	1.53768	1.62092	1.60353	1.54417	1.76276
		2.3	1.73448	1.53944	1.62137	1.60334	1.54336	1.76458
		2.30333	1.73533	1.53834	1.6241	1.6015	1.54015	1.76792
		2.30667	1.73567	1.53743	1.62206	1.60295	1.54129	1.76556
		2.31	1.73651	1.53699	1.62117	1.60248	1.54239	1.7647
		2.31333	1.73514	1.53751	1.62053	1.60213	1.54418	1.76675
		2.31667	1.73338	1.53677	1.62247	1.60179	1.54508	1.76711
		2.32	1.73231	1.53713	1.62194	1.60377	1.54837	1.76384
		2.32333	1.73423	1.53832	1.62361	1.60343	1.54504	1.76587
		2.32667	1.73413	1.53919	1.62197	1.60325	1.54484	1.76669
		2.33	1.73433	1.53873	1.62377	1.60249	1.54445	1.76572
		2.33333	1.73688	1.54003	1.62341	1.60328	1.54543	1.76606
		2.33667	1.73696	1.54167	1.62275	1.60437	1.54661	1.76714
		2.34	1.73589	1.54212	1.62231	1.60463	1.55014	1.76796
		2.34333	1.73381	1.5423	1.62469	1.60614	1.54975	1.76733
		2.34667	1.73576	1.54274	1.62245	1.606	1.54849	1.76859
		2.35	1.73662	1.54268	1.6237	1.60754	1.5487	1.76685
		2.35333	1.73767	1.54215	1.62274	1.60725	1.54702	1.76766
		2.35667	1.7399	1.5419	1.62517	1.60804	1.54663	1.76818
		2.36	1.74316	1.54201	1.62633	1.60659	1.5468	1.76789
		2.36333	1.74377	1.54314	1.63016	1.60836	1.54746	1.7691
		2.36667	1.7457	1.54341	1.62834	1.60741	1.54593	1.76846
		2.37	1.745	1.54385	1.62972	1.60686	1.54771	1.76947
		2.37333	1.74448	1.54546	1.6276	1.60416	1.54737	1.76901
		2.37667	1.74571	1.54638	1.62608	1.60626	1.54869	1.77136
		2.38	1.74583	1.54689	1.62474	1.60596	1.54808	1.76868
		2.38333	1.74431	1.54606	1.62595	1.60648	1.54902	1.76966
		2.38667	1.74465	1.54607	1.62742	1.6073	1.54868	1.76854
		2.39	1.74414	1.54613	1.62986	1.60852	1.55128	1.76794
		2.39333	1.74013	1.54681	1.62969	1.60785	1.55318	1.76802
		2.39667	1.74015	1.54768	1.62923	1.60812	1.55525	1.76885
		2.4	1.73776	1.54858	1.63027	1.60814	1.55576	1.77116
		2.40333	1.73677	1.54893	1.62982	1.60726	1.55612	1.77201
		2.40667	1.73718	1.54881	1.62976	1.6098	1.55343	1.7722
		2.41	1.73791	1.5481	1.62881	1.60931	1.55295	1.77084
		2.41333	1.73887	1.54775	1.62902	1.61061	1.55171	1.76972
		2.41667	1.7426	1.54662	1.6293	1.6113	1.5529	1.76919
		2.42	1.746	1.54765	1.62999	1.61041	1.55287	1.76955
		2.42333	1.74601	1.54802	1.62891	1.60968	1.55469	1.76866
		2.42667	1.74813	1.54906	1.63219	1.61028	1.55303	1.77005
		2.43	1.74711	1.54911	1.63353	1.6079	1.55645	1.77439
		2.43333	1.74845	1.55062	1.63218	1.6083	1.55473	1.77474
		2.43667	1.74974	1.55225	1.63106	1.60944	1.55632	1.77448
		2.44	1.7511	1.55337	1.6299	1.61015	1.55767	1.7763
		2.44333	1.75214	1.5529	1.62911	1.60919	1.55982	1.77535
		2.44667	1.75152	1.55245	1.62959	1.61102	1.55707	1.77224
		2.45	1.74978	1.55279	1.63126	1.6117	1.55865	1.773
		2.45333	1.74722	1.55089	1.63211	1.61248	1.55616	1.77432
		2.45667	1.74777	1.54973	1.63452	1.61233	1.55712	1.77464
		2.46	1.74772	1.54974	1.63403	1.61153	1.55777	1.77419
		2.46333	1.74896	1.55042	1.63652	1.61109	1.56106	1.77654
		2.46667	1.74883	1.54993	1.63704	1.61076	1.56049	1.77467
		2.47	1.75096	1.55063	1.63907	1.60949	1.56406	1.77135
		2.47333	1.74967	1.5521	1.63937	1.60962	1.56193	1.77344
		2.47667	1.74914	1.5546	1.64279	1.61116	1.56199	1.77689
		2.48	1.75004	1.55458	1.64033	1.6116	1.559	1.7771
		2.48333	1.75087	1.55633	1.64176	1.60989	1.56	1.77634
		2.48667	1.74977	1.55808	1.64043	1.61074	1.5602	1.7799
		2.49	1.74759	1.55659	1.64036	1.60999	1.56165	1.77808
		2.49333	1.75017	1.55608	1.63893	1.61139	1.55817	1.77542
		2.49667	1.74962	1.55628	1.63916	1.61102	1.55996	1.77409
		2.5	1.75054	1.556	1.63758	1.61157	1.56313	1.77634
		2.50333	1.75216	1.55665	1.63893	1.61335	1.56273	1.77493
		2.50667	1.75491	1.55599	1.63928	1.61486	1.56337	1.77384
		2.51	1.75252	1.55644	1.64021	1.61431	1.56608	1.7732
		2.51333	1.75448	1.55707	1.64067	1.61456	1.5678	1.77256
		2.51667	1.75492	1.55762	1.63964	1.61635	1.567	1.77115
		2.52	1.7551	1.55604	1.63776	1.61659	1.56716	1.77391
		2.52333	1.75626	1.55845	1.63831	1.61613	1.56707	1.77654
		2.52667	1.75617	1.55838	1.63746	1.61675	1.56683	1.78031
		2.53	1.75473	1.55896	1.63916	1.61776	1.56492	1.78173
		2.53333	1.75519	1.55822	1.64077	1.61684	1.56529	1.78222
		2.53667	1.75424	1.56034	1.64177	1.61615	1.56711	1.781
		2.54	1.75157	1.56039	1.64159	1.61484	1.56664	1.78009
		2.54333	1.75367	1.5606	1.64327	1.61458	1.56747	1.77953
		2.54667	1.75408	1.56096	1.64229	1.61497	1.56728	1.78009
		2.55	1.75403	1.56143	1.64338	1.61563	1.56592	1.77983
		2.55333	1.7529	1.56067	1.64406	1.61646	1.56424	1.78102
		2.55667	1.75427	1.5612	1.64466	1.61851	1.5657	1.78322
		2.56	1.75292	1.5619	1.64262	1.61774	1.56588	1.78189
		2.56333	1.75125	1.56205	1.64386	1.61898	1.56816	1.78012
		2.56667	1.7517	1.56352	1.64269	1.61866	1.5686	1.78365
		2.57	1.75311	1.56447	1.64435	1.61814	1.5679	1.78352
		2.57333	1.75426	1.56435	1.64501	1.61718	1.56892	1.78146
		2.57667	1.755	1.56427	1.64628	1.61949	1.57073	1.78107
		2.58	1.75964	1.56432	1.64626	1.61782	1.57093	1.78279
		2.58333	1.75825	1.56365	1.6475	1.6184	1.57089	1.78088
		2.58667	1.75794	1.56397	1.64599	1.61824	1.57204	1.78118
		2.59	1.75905	1.5645	1.64593	1.6177	1.57006	1.78183
		2.59333	1.75935	1.56444	1.64578	1.61539	1.57138	1.78247
		2.59667	1.75491	1.56407	1.6468	1.61398	1.56928	1.78439
		2.6	1.75403	1.56671	1.64557	1.61293	1.56884	1.78596
		2.60333	1.75565	1.56631	1.64617	1.61377	1.568	1.78562
		2.60667	1.7547	1.5666	1.64554	1.61485	1.56825	1.78365
		2.61	1.75617	1.56763	1.64859	1.61537	1.5657	1.78512
		2.61333	1.75805	1.56867	1.64722	1.61673	1.56802	1.78395
		2.61667	1.76057	1.56628	1.64957	1.61814	1.57018	1.78156
		2.62	1.7602	1.56662	1.64984	1.61859	1.5717	1.78482
		2.62333	1.75872	1.56641	1.65052	1.62012	1.57374	1.78853
		2.62667	1.75803	1.56593	1.6478	1.62063	1.57384	1.78831
		2.63	1.75772	1.56739	1.64829	1.6208	1.57437	1.78632
		2.63333	1.75764	1.56916	1.64432	1.61878	1.57281	1.78915
		2.63667	1.75972	1.56844	1.64515	1.61792	1.57479	1.78738
		2.64	1.76211	1.56908	1.64587	1.61678	1.57431	1.78578
		2.64333	1.76181	1.57083	1.64778	1.61732	1.57419	1.78591
		2.64667	1.76385	1.57038	1.64802	1.61866	1.57399	1.78813
		2.65	1.76318	1.56998	1.6513	1.62145	1.57472	1.78891
		2.65333	1.75914	1.57063	1.6513	1.62151	1.57322	1.7892
		2.65667	1.75913	1.57054	1.65183	1.62362	1.57403	1.79084
		2.66	1.75972	1.56878	1.65194	1.62252	1.5769	1.79069
		2.66333	1.76013	1.5703	1.65346	1.62256	1.57699	1.79102
		2.66667	1.76238	1.57057	1.65336	1.62224	1.57576	1.7886
		2.67	1.76594	1.57144	1.65267	1.62203	1.57822	1.78728
		2.67333	1.76488	1.57109	1.65194	1.61975	1.57589	1.78799
		2.67667	1.76501	1.5725	1.6513	1.62256	1.57762	1.78942
		2.68	1.76417	1.57148	1.64974	1.62062	1.57831	1.79048
		2.68333	1.76306	1.57198	1.65149	1.62024	1.58	1.79071
		2.68667	1.76038	1.57273	1.65269	1.6212	1.57705	1.79169
		2.69	1.76334	1.57392	1.65296	1.62351	1.58248	1.78923
		2.69333	1.76446	1.57405	1.65392	1.62317	1.57904	1.78738
		2.69667	1.76457	1.5727	1.65383	1.62366	1.57982	1.78703
		2.7	1.76478	1.57252	1.65352	1.6231	1.58244	1.78904
		2.70333	1.76879	1.57247	1.65499	1.62319	1.58265	1.789
		2.70667	1.76852	1.57417	1.65447	1.62157	1.57917	1.79036
		2.71	1.76864	1.5748	1.65467	1.62225	1.58252	1.79151
		2.71333	1.76916	1.57433	1.65511	1.62327	1.58239	1.79099
		2.71667	1.76902	1.57519	1.65524	1.62348	1.57938	1.79055
		2.72	1.76722	1.5748	1.65465	1.62536	1.5818	1.78994
		2.72333	1.76702	1.57191	1.65649	1.62312	1.5813	1.78884
		2.72667	1.76551	1.57135	1.65728	1.62279	1.58135	1.78855
		2.73	1.76483	1.57359	1.65779	1.62354	1.57745	1.78836
		2.73333	1.76516	1.57277	1.65599	1.62417	1.57958	1.78936
		2.73667	1.76326	1.57342	1.65504	1.62129	1.57761	1.79095
		2.74	1.76433	1.57534	1.65417	1.62454	1.58132	1.78889
		2.74333	1.76591	1.57802	1.65495	1.6238	1.58025	1.78987
		2.74667	1.76819	1.57786	1.65652	1.62362	1.58227	1.79251
		2.75	1.76932	1.5784	1.6579	1.62224	1.58527	1.79104
		2.75333	1.76921	1.57905	1.65735	1.62366	1.58686	1.79108
		2.75667	1.76895	1.57875	1.65877	1.62198	1.58566	1.79473
		2.76	1.76743	1.57833	1.65625	1.6227	1.58471	1.79387
		2.76333	1.76777	1.57843	1.65575	1.62199	1.58675	1.79191
		2.76667	1.7682	1.58034	1.65644	1.62304	1.58196	1.79143
		2.77	1.77175	1.58193	1.65836	1.62339	1.58217	1.79231
		2.77333	1.77071	1.58189	1.66021	1.6233	1.58093	1.79019
		2.77667	1.77303	1.58102	1.66254	1.62372	1.58349	1.7898
		2.78	1.77351	1.58223	1.66252	1.6247	1.58235	1.79074
		2.78333	1.77204	1.58036	1.66279	1.62521	1.58317	1.79186
		2.78667	1.77172	1.57898	1.66149	1.62374	1.58224	1.78993
		2.79	1.77391	1.58106	1.6602	1.62549	1.58292	1.79432
		2.79333	1.77245	1.58061	1.65844	1.62437	1.5794	1.7972
		2.79667	1.77268	1.58081	1.65683	1.62482	1.57895	1.79851
		2.8	1.77604	1.58199	1.65846	1.62415	1.58034	1.79953
		2.80333	1.77558	1.58323	1.66058	1.62557	1.58245	1.80125
		2.80667	1.77349	1.58296	1.65836	1.6244	1.58224	1.79829
		2.81	1.77448	1.58374	1.66077	1.62525	1.58568	1.79745
		2.81333	1.77456	1.58459	1.66279	1.62353	1.58469	1.79512
		2.81667	1.77249	1.58495	1.66035	1.62587	1.58464	1.79375
		2.82	1.77368	1.58435	1.65986	1.62357	1.58318	1.7946
		2.82333	1.77424	1.58439	1.66211	1.62536	1.58503	1.79635
		2.82667	1.77274	1.58615	1.66127	1.62451	1.58043	1.79557
		2.83	1.77278	1.58538	1.66279	1.62557	1.58193	1.79684
		2.83333	1.77173	1.58541	1.66418	1.62279	1.58424	1.79905
		2.83667	1.77215	1.58615	1.66486	1.62671	1.5855	1.79929
		2.84	1.7744	1.58565	1.66496	1.62719	1.58521	1.79673
		2.84333	1.7761	1.58372	1.66497	1.62944	1.5901	1.79712
		2.84667	1.7759	1.58451	1.66381	1.63013	1.58963	1.79899
		2.85	1.77714	1.58465	1.66466	1.63294	1.58802	1.79859
		2.85333	1.77791	1.58387	1.66354	1.63149	1.5884	1.7974
		2.85667	1.7775	1.58487	1.66482	1.63023	1.58774	1.80019
		2.86	1.77877	1.58582	1.66693	1.62873	1.58852	1.80036
		2.86333	1.77844	1.58453	1.66579	1.62775	1.58896	1.8006
		2.86667	1.78117	1.58379	1.66622	1.62573	1.58932	1.79862
		2.87	1.78154	1.5834	1.66785	1.62584	1.58726	1.79863
		2.87333	1.78096	1.58325	1.66652	1.6275	1.58864	1.79656
		2.87667	1.7804	1.58337	1.66536	1.62894	1.58625	1.79691
		2.88	1.77791	1.58514	1.66671	1.6299	1.58811	1.79542
		2.88333	1.77717	1.58611	1.66733	1.63132	1.5881	1.79673
		2.88667	1.77553	1.58699	1.66707	1.63041	1.5896	1.79801
		2.89	1.77738	1.58688	1.66926	1.63024	1.58769	1.80038
		2.89333	1.77876	1.58758	1.67082	1.62867	1.59053	1.80072
		2.89667	1.78241	1.58611	1.67042	1.62857	1.5917	1.7994
		2.9	1.78127	1.58641	1.66969	1.62918	1.59177	1.79879
		2.90333	1.78365	1.587	1.6706	1.62989	1.59248	1.79668
		2.90667	1.78208	1.58722	1.66783	1.62865	1.59322	1.79698
		2.91	1.78031	1.587	1.66704	1.62895	1.59139	1.79707
		2.91333	1.78214	1.58834	1.66707	1.62876	1.59284	1.80045
		2.91667	1.78235	1.58728	1.66633	1.6285	1.59326	1.80143
		2.92	1.78007	1.58689	1.66645	1.62909	1.59331	1.80381
		2.92333	1.78026	1.58688	1.66653	1.62886	1.59449	1.80308
		2.92667	1.78272	1.58744	1.66467	1.62758	1.59629	1.80175
		2.93	1.78081	1.58702	1.66641	1.62776	1.59225	1.79913
		2.93333	1.78196	1.58852	1.66573	1.62863	1.59382	1.80154
		2.93667	1.78309	1.58928	1.66497	1.62963	1.59425	1.80114
		2.94	1.78169	1.58982	1.66583	1.63016	1.59317	1.79934
		2.94333	1.7803	1.59	1.66662	1.63187	1.59325	1.79973
		2.94667	1.78086	1.59107	1.66643	1.63158	1.59647	1.8009
		2.95	1.78047	1.59105	1.66844	1.63167	1.5954	1.80157
		2.95333	1.78046	1.59136	1.66719	1.63063	1.59596	1.801
		2.95667	1.78399	1.59158	1.66754	1.63012	1.59434	1.80335
		2.96	1.78282	1.59203	1.66902	1.63135	1.59432	1.80427
		2.96333	1.78273	1.59189	1.66937	1.63255	1.59244	1.80449
		2.96667	1.78327	1.59202	1.66806	1.63092	1.59356	1.80168
		2.97	1.7816	1.59182	1.66916	1.63135	1.59026	1.80307
		2.97333	1.78087	1.59144	1.67047	1.63247	1.59585	1.80423
		2.97667	1.78306	1.59054	1.67145	1.63299	1.59558	1.80533
		2.98	1.78157	1.59145	1.66976	1.63129	1.59595	1.80673
		2.98333	1.78303	1.59237	1.67084	1.63238	1.59743	1.80607
		2.98667	1.78797	1.59249	1.67105	1.63227	1.60074	1.80643
		2.99	1.78914	1.593	1.6707	1.63335	1.59781	1.80628
		2.99333	1.78965	1.593	1.67032	1.63134	1.59889	1.80494
		2.99667	1.79172	1.59266	1.67281	1.63384	1.60063	1.80247
		3	1.78941	1.59245	1.67334	1.63432	1.59893	1.80562
		3.00333	1.78589	1.59302	1.67528	1.63541	1.5993	1.80488
		3.00667	1.7836	1.59342	1.67538	1.63365	1.59782	1.80176
		3.01	1.78313	1.59499	1.6749	1.63442	1.59746	1.80091
		3.01333	1.78393	1.59478	1.67236	1.63446	1.5964	1.80295
		3.01667	1.78827	1.5956	1.67244	1.63402	1.59684	1.80284
		3.02	1.78923	1.59568	1.67193	1.63296	1.59536	1.80231
		3.02333	1.79077	1.59542	1.67145	1.63367	1.59825	1.80406
		3.02667	1.79124	1.59496	1.6722	1.63406	1.59946	1.80719
		3.03	1.79053	1.59445	1.67617	1.63409	1.59957	1.80662
		3.03333	1.78716	1.59326	1.67517	1.63438	1.59736	1.80588
		3.03667	1.78873	1.59468	1.67539	1.63363	1.59836	1.80647
		3.04	1.7899	1.59513	1.67495	1.63381	1.59617	1.80804
		3.04333	1.7912	1.59629	1.67589	1.63414	1.59569	1.807
		3.04667	1.79155	1.59727	1.67312	1.63512	1.59678	1.8048
		3.05	1.79329	1.59896	1.67451	1.63414	1.59955	1.80363
		3.05333	1.79101	1.59784	1.67455	1.63597	1.59762	1.80144
		3.05667	1.7909	1.59872	1.67599	1.63647	1.6006	1.801
		3.06	1.78953	1.59867	1.67471	1.63717	1.60211	1.80372
		3.06333	1.79124	1.59881	1.67605	1.63518	1.60112	1.80727
		3.06667	1.79098	1.59892	1.67506	1.63608	1.60063	1.80891
		3.07	1.79529	1.59922	1.67629	1.63736	1.60355	1.81145
		3.07333	1.7932	1.59931	1.67536	1.63753	1.60148	1.81357
		3.07667	1.79468	1.59947	1.6763	1.63686	1.59981	1.81034
		3.08	1.7956	1.59952	1.67663	1.63695	1.60161	1.81038
		3.08333	1.79509	1.59817	1.67753	1.63695	1.60136	1.81146
		3.08667	1.79188	1.59845	1.67458	1.63557	1.60179	1.81228
		3.09	1.79347	1.59788	1.67531	1.63578	1.60311	1.80958
		3.09333	1.79299	1.59775	1.67562	1.63674	1.60285	1.80963
		3.09667	1.79006	1.59896	1.67509	1.63698	1.60089	1.80889
		3.1	1.78801	1.60039	1.67545	1.63688	1.60201	1.80804
		3.10333	1.78589	1.60094	1.67733	1.63696	1.60028	1.8063
		3.10667	1.78383	1.60133	1.67787	1.63681	1.60122	1.80684
		3.11	1.7851	1.60114	1.6777	1.63653	1.60333	1.80794
		3.11333	1.78447	1.5999	1.67878	1.6386	1.60528	1.80728
		3.11667	1.78839	1.59926	1.68023	1.63933	1.60573	1.80485
		3.12	1.79369	1.59926	1.68095	1.63933	1.60839	1.80661
		3.12333	1.79593	1.5997	1.68125	1.6386	1.60885	1.80587
		3.12667	1.79497	1.60052	1.68017	1.63905	1.60548	1.80808
		3.13	1.79476	1.60129	1.6791	1.63801	1.60745	1.809
		3.13333	1.79299	1.6026	1.6784	1.63725	1.60515	1.8095
		3.13667	1.79088	1.60274	1.67816	1.63783	1.60272	1.80939
		3.14	1.78995	1.603	1.67967	1.6372	1.60132	1.81066
		3.14333	1.79339	1.60116	1.67936	1.63775	1.60426	1.80811
		3.14667	1.79431	1.60197	1.6812	1.63745	1.60529	1.80867
		3.15	1.79762	1.60142	1.68136	1.6399	1.60731	1.80904
		3.15333	1.79925	1.6017	1.68065	1.63888	1.60917	1.80972
		3.15667	1.80216	1.60078	1.67846	1.64042	1.61113	1.81079
		3.16	1.79878	1.60355	1.6796	1.63883	1.61024	1.81212
		3.16333	1.79869	1.60347	1.67763	1.63828	1.60927	1.81425
		3.16667	1.79471	1.60369	1.6774	1.63819	1.61169	1.81512
		3.17	1.79284	1.60361	1.67836	1.63948	1.61156	1.81384
		3.17333	1.79068	1.60463	1.67896	1.63935	1.6121	1.81161
		3.17667	1.79252	1.60381	1.68037	1.64153	1.61282	1.80983
		3.18	1.79322	1.6038	1.6814	1.64258	1.61033	1.80839
		3.18333	1.79547	1.6036	1.68245	1.6412	1.60869	1.8085
		3.18667	1.79686	1.60356	1.68215	1.64067	1.60769	1.80863
		3.19	1.79768	1.60392	1.68214	1.64124	1.60646	1.80991
		3.19333	1.79747	1.60553	1.68115	1.63891	1.60789	1.81076
		3.19667	1.79604	1.60517	1.68329	1.63957	1.60805	1.80916
		3.2	1.7954	1.60587	1.68216	1.64038	1.60787	1.81043
		3.20333	1.79399	1.60585	1.68312	1.63967	1.60846	1.81097
		3.20667	1.79393	1.60572	1.68386	1.63811	1.61016	1.81134
		3.21	1.79202	1.60433	1.68482	1.63804	1.60845	1.8117
		3.21333	1.79406	1.60671	1.68381	1.63695	1.61125	1.81353
		3.21667	1.79453	1.6083	1.68517	1.63586	1.61028	1.81374
		3.22	1.79622	1.60879	1.68404	1.63562	1.61191	1.81641
		3.22333	1.79725	1.60973	1.68466	1.63591	1.61072	1.81561
		3.22667	1.79896	1.60963	1.68419	1.63774	1.61151	1.81581
		3.23	1.79813	1.60792	1.68515	1.63726	1.61256	1.81345
		3.23333	1.79807	1.6053	1.68462	1.63959	1.61251	1.81193
		3.23667	1.79835	1.60652	1.6857	1.64153	1.61191	1.81021
		3.24	1.79776	1.60626	1.68507	1.64462	1.61117	1.8095
		3.24333	1.7965	1.60747	1.68403	1.64474	1.60982	1.80895
		3.24667	1.79878	1.60793	1.68302	1.64572	1.60865	1.81146
		3.25	1.80027	1.60939	1.68359	1.64559	1.61118	1.81107
		3.25333	1.79918	1.60958	1.68288	1.64505	1.6134	1.81282
		3.25667	1.79959	1.60958	1.68464	1.64545	1.61485	1.81519
		3.26	1.79777	1.60988	1.6864	1.64533	1.61577	1.81652
		3.26333	1.79767	1.6105	1.6861	1.6462	1.61357	1.81622
		3.26667	1.79438	1.6104	1.68548	1.64428	1.61319	1.8172
		3.27	1.79379	1.60982	1.68662	1.64461	1.6137	1.81584
		3.27333	1.79397	1.61005	1.68588	1.64241	1.61495	1.81423
		3.27667	1.7956	1.60963	1.68553	1.64392	1.61607	1.81611
		3.28	1.79413	1.60886	1.68527	1.64295	1.61985	1.81518
		3.28333	1.797	1.60952	1.68517	1.64533	1.61892	1.8137
		3.28667	1.8008	1.60858	1.68474	1.64453	1.61768	1.8143
		3.29	1.8039	1.6091	1.6832	1.64536	1.61748	1.81427
		3.29333	1.80463	1.60892	1.68342	1.64304	1.61614	1.81268
		3.29667	1.80469	1.6101	1.68437	1.64276	1.61529	1.8149
		3.3	1.80531	1.61132	1.68592	1.64166	1.61461	1.81827
		3.30333	1.80208	1.61279	1.68655	1.64201	1.61404	1.81757
		3.30667	1.79943	1.61156	1.68729	1.64161	1.61294	1.8174
		3.31	1.80055	1.61235	1.68788	1.64106	1.61496	1.8151
		3.31333	1.80011	1.61152	1.68904	1.64283	1.61411	1.81289
		3.31667	1.79974	1.61015	1.68863	1.64191	1.61502	1.81141
		3.32	1.80206	1.61001	1.68849	1.64155	1.61256	1.80962
		3.32333	1.80257	1.61189	1.68985	1.63982	1.617	1.8108
		3.32667	1.80222	1.61184	1.68832	1.63943	1.61399	1.81332
		3.33	1.80691	1.61167	1.68772	1.637	1.61486	1.81214
		3.33333	1.80676	1.61355	1.68717	1.63791	1.61732	1.81272
		3.33667	1.80696	1.61512	1.68707	1.63818	1.62139	1.81613
		3.34	1.80638	1.61346	1.68685	1.63958	1.61761	1.81745
		3.34333	1.80716	1.61323	1.68857	1.64178	1.62059	1.8181
		3.34667	1.80319	1.6147	1.68755	1.64364	1.61878	1.81889
		3.35	1.80336	1.61298	1.68859	1.64379	1.61864	1.81838
		3.35333	1.80125	1.61133	1.6887	1.64493	1.61584	1.81701
		3.35667	1.80087	1.61295	1.69048	1.6457	1.61777	1.8144
		3.36	1.80167	1.6136	1.6887	1.64569	1.61793	1.81288
		3.36333	1.80281	1.61366	1.68928	1.64662	1.61985	1.81282
		3.36667	1.80364	1.61316	1.68901	1.64656	1.61769	1.81262
		3.37	1.80634	1.61362	1.69	1.64545	1.61859	1.81249
		3.37333	1.80723	1.6128	1.68858	1.64569	1.61625	1.81581
		3.37667	1.80822	1.61221	1.69012	1.64555	1.61654	1.81536
		3.38	1.80843	1.61228	1.69104	1.64501	1.61608	1.81567
		3.38333	1.80945	1.61432	1.69271	1.64582	1.61683	1.81524
		3.38667	1.81084	1.61505	1.69347	1.64693	1.61704	1.81545
		3.39	1.81168	1.6152	1.69387	1.64701	1.617	1.81347
		3.39333	1.81211	1.61625	1.69429	1.64612	1.6178	1.8167
		3.39667	1.81112	1.61607	1.69427	1.64682	1.61883	1.81982
		3.4	1.80826	1.61563	1.69461	1.64597	1.6206	1.81919
		3.40333	1.80571	1.61579	1.69315	1.64471	1.62398	1.81934
		3.40667	1.80457	1.61601	1.69413	1.64596	1.62581	1.81884
		3.41	1.80035	1.61635	1.69475	1.64761	1.6227	1.81671
		3.41333	1.80046	1.61638	1.69529	1.64652	1.62408	1.81435
		3.41667	1.80071	1.61743	1.69502	1.64728	1.62378	1.81567
		3.42	1.80026	1.61736	1.6964	1.64941	1.62127	1.81484
		3.42333	1.80101	1.61858	1.69618	1.6468	1.61892	1.81535
		3.42667	1.80311	1.61876	1.69517	1.64475	1.62081	1.81598
		3.43	1.80384	1.61885	1.69629	1.64343	1.62066	1.81832
		3.43333	1.80595	1.61709	1.69528	1.64121	1.61912	1.81681
		3.43667	1.80698	1.61838	1.69403	1.63942	1.61878	1.81784
		3.44	1.80588	1.61729	1.69429	1.64117	1.61907	1.81825
		3.44333	1.80678	1.61688	1.69593	1.64272	1.62076	1.81639
		3.44667	1.81082	1.6176	1.69633	1.64449	1.61789	1.81474
		3.45	1.80703	1.61833	1.69569	1.64485	1.61731	1.81575
		3.45333	1.80823	1.6181	1.6953	1.64593	1.61907	1.81502
		3.45667	1.8108	1.61969	1.69453	1.64566	1.6212	1.81577
		3.46	1.80998	1.62108	1.69433	1.64616	1.62044	1.81617
		3.46333	1.80831	1.6217	1.69362	1.64532	1.62279	1.81674
		3.46667	1.81187	1.62148	1.695	1.6475	1.62531	1.81963
		3.47	1.81215	1.62121	1.69814	1.64727	1.62448	1.82078
		3.47333	1.8124	1.62153	1.69897	1.64858	1.62315	1.81712
		3.47667	1.81301	1.62072	1.69866	1.64685	1.62235	1.81791
		3.48	1.81215	1.62031	1.69915	1.64857	1.62022	1.82074
		3.48333	1.81006	1.62094	1.69905	1.6476	1.61889	1.81787
		3.48667	1.80992	1.622	1.69644	1.64751	1.619	1.81889
		3.49	1.80911	1.62113	1.6955	1.64708	1.61902	1.82095
		3.49333	1.80945	1.62194	1.69451	1.64752	1.61952	1.82022
		3.49667	1.8091	1.62215	1.69354	1.64661	1.62004	1.81817
		3.5	1.81038	1.62295	1.69322	1.64799	1.61936	1.81989
		3.50333	1.80918	1.62163	1.69527	1.64935	1.61735	1.81715
		3.50667	1.80804	1.62228	1.69659	1.64909	1.6169	1.818
		3.51	1.80779	1.62159	1.69843	1.65046	1.61794	1.81759
		3.51333	1.80919	1.62305	1.69925	1.65023	1.62073	1.81751
		3.51667	1.80926	1.62315	1.70044	1.65028	1.62111	1.8155
		3.52	1.81232	1.62248	1.69987	1.64962	1.62349	1.8158
		3.52333	1.81521	1.62186	1.69955	1.6477	1.62346	1.81529
		3.52667	1.81584	1.62305	1.69815	1.64875	1.62161	1.81447
		3.53	1.81544	1.62165	1.69722	1.64962	1.62178	1.81552
		3.53333	1.81441	1.6225	1.6968	1.64914	1.62121	1.81812
		3.53667	1.81104	1.62385	1.69747	1.64916	1.61931	1.82047
		3.54	1.80788	1.62428	1.69676	1.6514	1.62093	1.81952
		3.54333	1.80802	1.62492	1.69858	1.65074	1.62118	1.81953
		3.54667	1.80535	1.62595	1.69828	1.65061	1.62011	1.81741
		3.55	1.80678	1.62442	1.699	1.65144	1.62015	1.8168
		3.55333	1.80863	1.62392	1.69829	1.65205	1.62222	1.81486
		3.55667	1.81026	1.62537	1.70043	1.65003	1.62259	1.8153
		3.56	1.81202	1.62382	1.7006	1.64993	1.62503	1.8177
		3.56333	1.81599	1.6239	1.70182	1.65056	1.62599	1.81782
		3.56667	1.81925	1.62498	1.70128	1.64973	1.62853	1.81787
		3.57	1.81935	1.62545	1.70453	1.64867	1.62942	1.82004
		3.57333	1.82136	1.62593	1.70566	1.65096	1.6289	1.82312
		3.57667	1.82065	1.62702	1.70495	1.65118	1.62597	1.82191
		3.58	1.81894	1.62783	1.70656	1.64973	1.62684	1.82088
		3.58333	1.81708	1.62631	1.70742	1.64833	1.6272	1.82046
		3.58667	1.81718	1.62548	1.70366	1.64845	1.62802	1.81851
		3.59	1.81555	1.62437	1.70251	1.64771	1.62981	1.81678
		3.59333	1.81224	1.6247	1.7036	1.64788	1.63172	1.81706
		3.59667	1.81264	1.62319	1.70343	1.65049	1.63005	1.81867
		3.6	1.81391	1.62614	1.70253	1.65093	1.62864	1.81811
		3.60333	1.81665	1.6278	1.70465	1.65027	1.62594	1.81847
		3.60667	1.81712	1.62887	1.70467	1.64864	1.62449	1.82004
		3.61	1.81977	1.62842	1.70617	1.64859	1.62536	1.81927
		3.61333	1.81842	1.63072	1.70581	1.64844	1.62742	1.82043
		3.61667	1.81652	1.62989	1.70474	1.64916	1.62936	1.82075
		3.62	1.81337	1.63091	1.70461	1.64835	1.63173	1.82302
		3.62333	1.81171	1.62852	1.7043	1.64981	1.63239	1.82199
		3.62667	1.81079	1.63098	1.70129	1.64861	1.63441	1.82304
		3.63	1.81303	1.62888	1.7005	1.6464	1.63455	1.82098
		3.63333	1.81327	1.62945	1.70186	1.64637	1.63577	1.82106
		3.63667	1.81279	1.62939	1.70236	1.64992	1.63422	1.81956
		3.64	1.81619	1.63176	1.70287	1.64869	1.63359	1.81947
		3.64333	1.81821	1.6293	1.70416	1.65127	1.62892	1.82045
		3.64667	1.81973	1.63128	1.7027	1.65204	1.62689	1.82022
		3.65	1.82041	1.63021	1.70346	1.65298	1.6262	1.82134
		3.65333	1.82069	1.62937	1.70262	1.65219	1.62873	1.82221
		3.65667	1.82023	1.62944	1.70293	1.65563	1.62968	1.82405
		3.66	1.81866	1.62989	1.70187	1.65283	1.63275	1.82432
		3.66333	1.81789	1.62993	1.70515	1.6526	1.6344	1.82601
		3.66667	1.82	1.63074	1.70555	1.65198	1.63295	1.82388
		3.67	1.82202	1.63169	1.70574	1.65074	1.63109	1.82468
		3.67333	1.82181	1.62972	1.70478	1.64893	1.63169	1.82209
		3.67667	1.82143	1.62946	1.70513	1.65147	1.63267	1.82209
		3.68	1.82047	1.62913	1.70415	1.65268	1.63123	1.82031
		3.68333	1.81798	1.62904	1.70343	1.65318	1.63184	1.82079
		3.68667	1.81825	1.62814	1.70354	1.65434	1.63347	1.81946
		3.69	1.82044	1.63056	1.70322	1.65357	1.63136	1.81975
		3.69333	1.82097	1.63087	1.70501	1.65172	1.63168	1.81829
		3.69667	1.81967	1.63255	1.7037	1.64972	1.63213	1.82055
		3.7	1.81947	1.63362	1.70455	1.65065	1.63171	1.82042
		3.70333	1.81832	1.63439	1.70505	1.64925	1.62955	1.81971
		3.70667	1.81293	1.63356	1.70543	1.6521	1.62841	1.82066
		3.71	1.81377	1.63383	1.70469	1.65166	1.62744	1.82197
		3.71333	1.81473	1.63236	1.70662	1.65429	1.62725	1.82159
		3.71667	1.81338	1.6308	1.70611	1.6523	1.62631	1.82318
		3.72	1.81275	1.63141	1.70634	1.65244	1.63007	1.82171
		3.72333	1.81524	1.63216	1.70808	1.64958	1.63435	1.81966
		3.72667	1.81181	1.6338	1.709	1.64906	1.6347	1.81898
		3.73	1.81311	1.63396	1.709	1.64728	1.63497	1.81883
		3.73333	1.81572	1.6344	1.71024	1.64817	1.63829	1.82002
		3.73667	1.81634	1.63381	1.71047	1.64946	1.63737	1.82168
		3.74	1.81685	1.63372	1.71057	1.65143	1.63742	1.82339
		3.74333	1.8202	1.63327	1.70881	1.65307	1.63549	1.82435
		3.74667	1.81813	1.63275	1.70792	1.65426	1.63431	1.82483
		3.75	1.81668	1.63346	1.70811	1.65355	1.63196	1.82398
		3.75333	1.81789	1.63446	1.70793	1.65261	1.63052	1.82659
		3.75667	1.81536	1.6352	1.70714	1.6507	1.62861	1.82509
		3.76	1.81589	1.63469	1.70872	1.65109	1.62954	1.82282
		3.76333	1.81654	1.63499	1.70959	1.6529	1.63135	1.81967
		3.76667	1.82026	1.63485	1.70816	1.65446	1.63533	1.81885
		3.77	1.81966	1.63415	1.7098	1.65625	1.63777	1.81507
		3.77333	1.82291	1.63304	1.70894	1.65648	1.64056	1.81671
		3.77667	1.82552	1.63251	1.7083	1.65674	1.64112	1.81788
		3.78	1.82491	1.63258	1.70733	1.65509	1.63972	1.81944
		3.78333	1.82036	1.63328	1.70991	1.65269	1.63624	1.81986
		3.78667	1.822	1.63351	1.70937	1.65248	1.636	1.81939
		3.79	1.82226	1.63421	1.7097	1.65407	1.63457	1.81884
		3.79333	1.82051	1.63586	1.71002	1.65411	1.63582	1.82011
		3.79667	1.82388	1.63538	1.71285	1.6525	1.63872	1.81989
		3.8	1.82587	1.63458	1.71044	1.65471	1.64067	1.81947
		3.80333	1.82611	1.63486	1.71034	1.65453	1.64082	1.82423
		3.80667	1.82401	1.63508	1.71064	1.65348	1.64146	1.82525
		3.81	1.82234	1.635	1.71054	1.65299	1.64049	1.82405
		3.81333	1.82158	1.63581	1.70916	1.65334	1.64054	1.82252
		3.81667	1.82095	1.63618	1.71074	1.65138	1.64006	1.82321
		3.82	1.82207	1.63619	1.70869	1.65204	1.63802	1.81958
		3.82333	1.82604	1.6354	1.71063	1.65429	1.63637	1.81804
		3.82667	1.82625	1.63507	1.71078	1.65493	1.6375	1.8175
		3.83	1.82525	1.63584	1.70995	1.65571	1.63798	1.81801
		3.83333	1.82592	1.63659	1.70987	1.65837	1.6372	1.81762
		3.83667	1.82251	1.63635	1.7107	1.65806	1.63728	1.8175
		3.84	1.81799	1.6366	1.71045	1.65669	1.63933	1.81935
		3.84333	1.81968	1.63705	1.71196	1.65752	1.638	1.82144
		3.84667	1.82043	1.6372	1.71185	1.65808	1.63496	1.82485
		3.85	1.82078	1.63669	1.71151	1.65595	1.63733	1.82417
		3.85333	1.82355	1.63678	1.71117	1.65474	1.63762	1.82466
		3.85667	1.82652	1.63863	1.7107	1.65541	1.63777	1.82217
		3.86	1.82632	1.63831	1.71183	1.65396	1.63829	1.82164
		3.86333	1.82654	1.63761	1.71409	1.65385	1.63951	1.82014
		3.86667	1.82837	1.63925	1.71451	1.65594	1.63801	1.82066
		3.87	1.82861	1.63901	1.71495	1.65744	1.63996	1.81941
		3.87333	1.82722	1.63821	1.71525	1.65609	1.63988	1.82093
		3.87667	1.82806	1.63939	1.7135	1.65637	1.6419	1.82273
		3.88	1.82602	1.63982	1.71196	1.65541	1.64254	1.82259
		3.88333	1.82582	1.63897	1.71092	1.65357	1.64127	1.82217
		3.88667	1.82471	1.64038	1.71171	1.65348	1.63912	1.82377
		3.89	1.82586	1.63904	1.71116	1.65542	1.6415	1.82452
		3.89333	1.82411	1.6377	1.71083	1.65484	1.64001	1.82168
		3.89667	1.82674	1.6379	1.71246	1.65663	1.63733	1.8215
		3.9	1.82579	1.63763	1.71305	1.65853	1.64052	1.82217
		3.90333	1.82424	1.63754	1.71488	1.65909	1.64155	1.82179
		3.90667	1.82515	1.64034	1.71437	1.65862	1.63772	1.82161
		3.91	1.82643	1.64044	1.71529	1.66059	1.63881	1.82231
		3.91333	1.82447	1.64121	1.71366	1.65872	1.64115	1.82266
		3.91667	1.82511	1.64224	1.71539	1.65763	1.64036	1.82098
		3.92	1.82878	1.64125	1.71447	1.65601	1.63931	1.82171
		3.92333	1.82723	1.63947	1.71424	1.65637	1.63875	1.82059
		3.92667	1.82864	1.64111	1.71377	1.65605	1.63709	1.82296
		3.93	1.83351	1.63998	1.71518	1.65613	1.63859	1.8248
		3.93333	1.8304	1.64012	1.71538	1.65642	1.63826	1.82839
		3.93667	1.83012	1.64157	1.71484	1.65678	1.6415	1.829
		3.94	1.83114	1.64292	1.71455	1.65675	1.64324	1.8308
		3.94333	1.8307	1.6419	1.71518	1.6551	1.64526	1.83105
		3.94667	1.82763	1.64359	1.71418	1.6554	1.64482	1.82706
		3.95	1.83108	1.64288	1.71183	1.65477	1.64608	1.82636
		3.95333	1.83382	1.64353	1.71045	1.65478	1.64489	1.82473
		3.95667	1.83359	1.64268	1.7114	1.65439	1.64422	1.82375
		3.96	1.83437	1.64289	1.70944	1.6551	1.642	1.8207
		3.96333	1.83531	1.64251	1.70924	1.65669	1.64016	1.82262
		3.96667	1.83555	1.64274	1.70999	1.65875	1.63786	1.82076
		3.97	1.83372	1.64184	1.71023	1.65956	1.63793	1.82393
		3.97333	1.83347	1.64299	1.71132	1.65955	1.64161	1.82456
		3.97667	1.83159	1.6425	1.71403	1.66009	1.64315	1.82538
		3.98	1.83244	1.64167	1.71335	1.65931	1.64538	1.82407
		3.98333	1.8334	1.6435	1.7144	1.65941	1.64693	1.82458
		3.98667	1.83286	1.64342	1.71702	1.65769	1.64596	1.82373
		3.99	1.83373	1.64385	1.71736	1.65785	1.64169	1.82101
		3.99333	1.8347	1.64455	1.7161	1.65886	1.64052	1.8202
		3.99667	1.83226	1.64515	1.71806	1.66092	1.63984	1.82315
		4	1.8315	1.64546	1.71667	1.65872	1.63999	1.82264
		4.00333	1.83025	1.64636	1.71627	1.66011	1.64227	1.82451
		4.00667	1.82952	1.64627	1.71535	1.65913	1.64329	1.82691
		4.01	1.82973	1.64782	1.71506	1.65661	1.64444	1.82856
		4.01333	1.82965	1.6488	1.71471	1.6561	1.64405	1.82723
		4.01667	1.82837	1.64817	1.71687	1.65548	1.64509	1.82723
		4.02	1.82831	1.64793	1.71495	1.65398	1.64545	1.82467
		4.02333	1.82695	1.64677	1.71627	1.65561	1.64652	1.82309
		4.02667	1.82627	1.646	1.71657	1.65812	1.64823	1.82222
		4.03	1.82547	1.64593	1.71659	1.65627	1.65093	1.82159
		4.03333	1.82559	1.64499	1.71642	1.65737	1.65076	1.82137
		4.03667	1.82699	1.64521	1.71831	1.65968	1.64959	1.82289
		4.04	1.82951	1.64691	1.71786	1.65691	1.65019	1.82407
		4.04333	1.82794	1.64733	1.71864	1.6555	1.64762	1.82443
		4.04667	1.83014	1.64673	1.71927	1.65649	1.64478	1.82559
		4.05	1.83016	1.64778	1.71999	1.65939	1.64266	1.82754
		4.05333	1.82911	1.64787	1.71795	1.66012	1.64049	1.82451
		4.05667	1.82835	1.64663	1.7165	1.66329	1.64033	1.82652
		4.06	1.82945	1.64566	1.71674	1.66384	1.64181	1.82537
		4.06333	1.8297	1.64601	1.71811	1.66308	1.64153	1.82334
		4.06667	1.83041	1.64685	1.7155	1.66231	1.64422	1.82414
		4.07	1.83189	1.64649	1.71907	1.66203	1.64683	1.82556
		4.07333	1.83316	1.64703	1.71963	1.66021	1.64672	1.82118
		4.07667	1.83588	1.64823	1.7191	1.65968	1.64627	1.82425
		4.08	1.83415	1.64823	1.71687	1.66037	1.64788	1.82383
		4.08333	1.8337	1.64731	1.71929	1.66032	1.64716	1.82088
		4.08667	1.83058	1.64808	1.71856	1.65863	1.64537	1.82096
		4.09	1.82969	1.64721	1.72063	1.65925	1.64495	1.8235
		4.09333	1.82928	1.64751	1.72104	1.6588	1.64529	1.81942
		4.09667	1.82832	1.64715	1.72217	1.65801	1.648	1.82179
		4.1	1.82986	1.64742	1.72141	1.65627	1.64694	1.82476
		4.10333	1.83454	1.64701	1.72073	1.65784	1.64988	1.82483
		4.10667	1.83404	1.64739	1.7212	1.65675	1.65204	1.82501
		4.11	1.8328	1.64702	1.72152	1.65736	1.6537	1.82875
		4.11333	1.834	1.64675	1.72107	1.65745	1.65177	1.82708
		4.11667	1.83096	1.64609	1.72103	1.65818	1.6541	1.8267
		4.12	1.83092	1.64664	1.72026	1.6578	1.65263	1.82523
		4.12333	1.82999	1.64874	1.71947	1.65977	1.65099	1.82323
		4.12667	1.83057	1.64856	1.72084	1.66191	1.65021	1.8214
		4.13	1.83138	1.65064	1.72085	1.66331	1.65117	1.82133
		4.13333	1.83201	1.65027	1.72207	1.66352	1.64888	1.82152
		4.13667	1.83077	1.65083	1.72302	1.66233	1.64805	1.8221
		4.14	1.8327	1.65026	1.72335	1.66042	1.64696	1.8233
		4.14333	1.83195	1.65042	1.72303	1.65953	1.6479	1.82662
		4.14667	1.83168	1.6489	1.72293	1.65955	1.64719	1.82794
		4.15	1.83501	1.65111	1.72275	1.65813	1.64797	1.82633
		4.15333	1.83274	1.65234	1.72148	1.65929	1.64915	1.82781
		4.15667	1.83529	1.65269	1.72115	1.66103	1.65256	1.82708
		4.16	1.83621	1.65442	1.71937	1.65893	1.65237	1.82348
		4.16333	1.83852	1.65614	1.71984	1.65642	1.65279	1.82209
		4.16667	1.83756	1.65542	1.72035	1.65689	1.65386	1.82167
		4.17	1.83937	1.65527	1.71963	1.65636	1.65174	1.8234
		4.17333	1.83736	1.65499	1.71809	1.65551	1.6489	1.82357
		4.17667	1.83839	1.6547	1.71857	1.65707	1.646	1.82443
		4.18	1.83641	1.65531	1.7191	1.65931	1.64415	1.8259
		4.18333	1.83665	1.65723	1.71932	1.66044	1.6435	1.8267
		4.18667	1.83704	1.6569	1.71969	1.66137	1.64244	1.82583
		4.19	1.83652	1.65827	1.72122	1.66231	1.64352	1.82659
		4.19333	1.83525	1.65962	1.7208	1.66133	1.64314	1.82642
		4.19667	1.83679	1.65867	1.71973	1.66272	1.64208	1.82653
		4.2	1.83674	1.65897	1.71903	1.66286	1.64157	1.82501
		4.20333	1.83859	1.66023	1.71975	1.66116	1.64655	1.82443
		4.20667	1.8412	1.66105	1.71856	1.66182	1.6459	1.82234
		4.21	1.84397	1.66085	1.72109	1.66384	1.64551	1.82149
		4.21333	1.84524	1.66309	1.72247	1.66319	1.6462	1.82365
		4.21667	1.84484	1.66338	1.72098	1.66266	1.64727	1.82494
		4.22	1.84181	1.66526	1.72225	1.66181	1.64331	1.82408
		4.22333	1.83976	1.66385	1.72383	1.66248	1.64376	1.82526
		4.22667	1.83691	1.66343	1.72241	1.66075	1.64674	1.82539
		4.23	1.83583	1.66284	1.72331	1.65992	1.64706	1.8223
		4.23333	1.83625	1.66281	1.72487	1.66146	1.64759	1.82305
		4.23667	1.83716	1.6611	1.72465	1.66492	1.6501	1.82517
		4.24	1.83764	1.66267	1.72562	1.66377	1.65089	1.82668
		4.24333	1.8371	1.6626	1.72709	1.66531	1.65165	1.82706
		4.24667	1.83702	1.66263	1.72438	1.66364	1.65247	1.82821
		4.25	1.83708	1.66223	1.72523	1.66218	1.65202	1.82596
		4.25333	1.8385	1.6618	1.72646	1.66179	1.65233	1.82648
		4.25667	1.8399	1.6618	1.72584	1.66102	1.65334	1.8241
		4.26	1.83946	1.66308	1.72551	1.66151	1.65333	1.82389
		4.26333	1.83801	1.6641	1.72765	1.6623	1.65352	1.8254
		4.26667	1.8363	1.66551	1.72665	1.6628	1.65566	1.82549
		4.27	1.83512	1.66651	1.72646	1.66258	1.65446	1.82457
		4.27333	1.83023	1.66482	1.72546	1.66308	1.65085	1.82462
		4.27667	1.83305	1.66501	1.7251	1.66126	1.65161	1.82642
		4.28	1.83339	1.66567	1.72463	1.66081	1.65099	1.82422
		4.28333	1.83773	1.66471	1.72487	1.66103	1.64829	1.82604
		4.28667	1.83836	1.66364	1.72417	1.66112	1.65009	1.82452
		4.29	1.84411	1.66664	1.72505	1.66268	1.65278	1.82742
		4.29333	1.84498	1.66617	1.72419	1.66424	1.65275	1.82603
		4.29667	1.84528	1.66555	1.7268	1.66405	1.65445	1.82526
		4.3	1.842	1.66613	1.72662	1.66539	1.65458	1.8259
		4.30333	1.84045	1.66659	1.72674	1.6638	1.65277	1.82669
		4.30667	1.8375	1.66689	1.72641	1.66109	1.65271	1.82624
		4.31	1.83524	1.66615	1.72827	1.66017	1.65288	1.82761
		4.31333	1.83599	1.66552	1.726	1.66176	1.65162	1.82974
		4.31667	1.83593	1.66426	1.72752	1.6602	1.65315	1.83024
		4.32	1.83679	1.66377	1.72911	1.66151	1.65445	1.83083
		4.32333	1.83793	1.6623	1.73059	1.66263	1.65607	1.83146
		4.32667	1.83759	1.66407	1.7315	1.66288	1.65591	1.83223
		4.33	1.83806	1.66482	1.73158	1.66343	1.65619	1.83161
		4.33333	1.83681	1.66648	1.7295	1.6649	1.65457	1.83258
		4.33667	1.83762	1.66817	1.72889	1.66538	1.65681	1.83437
		4.34	1.83561	1.66916	1.72758	1.66581	1.65702	1.83324
		4.34333	1.83853	1.66883	1.72557	1.66597	1.65725	1.83162
		4.34667	1.84074	1.66915	1.72548	1.66486	1.65839	1.8318
		4.35	1.8457	1.67035	1.72624	1.66339	1.65948	1.83138
		4.35333	1.84625	1.67052	1.72554	1.66434	1.65489	1.82838
		4.35667	1.84913	1.67057	1.72679	1.66508	1.65513	1.82584
		4.36	1.8474	1.66972	1.72797	1.6653	1.65377	1.82724
		4.36333	1.84329	1.66891	1.72842	1.66474	1.65351	1.82606
		4.36667	1.84118	1.66568	1.72908	1.66402	1.65454	1.82424
		4.37	1.83993	1.66559	1.72881	1.66183	1.65755	1.825
		4.37333	1.83841	1.66428	1.72736	1.66062	1.65572	1.82761
		4.37667	1.83757	1.66538	1.72825	1.65989	1.65584	1.82788
		4.38	1.83793	1.66613	1.7296	1.66002	1.65565	1.82896
		4.38333	1.83631	1.66866	1.72894	1.66112	1.65415	1.8316
		4.38667	1.83564	1.66879	1.73071	1.66113	1.65604	1.83061
		4.39	1.83552	1.66846	1.73136	1.66345	1.65979	1.83167
		4.39333	1.83431	1.66882	1.72794	1.66496	1.66277	1.83102
		4.39667	1.83496	1.66876	1.72703	1.66651	1.6655	1.82877
		4.4	1.83437	1.66779	1.72763	1.66593	1.66606	1.82649
		4.40333	1.83571	1.66781	1.72614	1.66726	1.6642	1.82762
		4.40667	1.8325	1.66825	1.72744	1.66342	1.66194	1.82514
		4.41	1.83609	1.66754	1.72893	1.66295	1.66096	1.8255
		4.41333	1.83718	1.66716	1.73016	1.6644	1.66062	1.82661
		4.41667	1.83813	1.66753	1.73065	1.66383	1.66206	1.82665
		4.42	1.83741	1.66745	1.73166	1.66655	1.66307	1.8268
		4.42333	1.84124	1.66833	1.73047	1.66786	1.66268	1.83064
		4.42667	1.84038	1.66982	1.7323	1.66651	1.66249	1.83091
		4.43	1.8403	1.6699	1.73106	1.66417	1.66081	1.83122
		4.43333	1.84396	1.66974	1.73024	1.66487	1.65718	1.83433
		4.43667	1.84542	1.66965	1.72883	1.6615	1.65511	1.83542
		4.44	1.84605	1.66991	1.72751	1.6603	1.65329	1.83269
		4.44333	1.84582	1.66806	1.72767	1.66085	1.65356	1.83121
		4.44667	1.84525	1.6687	1.72633	1.66225	1.65391	1.83144
		4.45	1.84364	1.66852	1.72595	1.66469	1.65625	1.82913
		4.45333	1.84426	1.66893	1.72798	1.6651	1.65436	1.82857
		4.45667	1.84524	1.66891	1.7308	1.66639	1.65643	1.82927
		4.46	1.84533	1.6708	1.73063	1.66726	1.65558	1.82933
		4.46333	1.84746	1.66904	1.73189	1.66766	1.65596	1.83109
		4.46667	1.84615	1.66901	1.73443	1.66658	1.65614	1.82892
		4.47	1.84735	1.66753	1.73273	1.66567	1.65973	1.82903
		4.47333	1.84672	1.66725	1.73192	1.66542	1.65975	1.82732
		4.47667	1.8472	1.66639	1.73144	1.66503	1.65911	1.82598
		4.48	1.84548	1.66916	1.72999	1.66413	1.65993	1.82366
		4.48333	1.84532	1.67046	1.72925	1.66344	1.66084	1.82575
		4.48667	1.84447	1.67244	1.73086	1.6643	1.6576	1.8244
		4.49	1.84103	1.67288	1.73053	1.66602	1.65815	1.82409
		4.49333	1.8416	1.67345	1.72842	1.66605	1.65801	1.82776
		4.49667	1.84161	1.67277	1.72975	1.66587	1.65724	1.82652
		4.5	1.84269	1.67137	1.7282	1.66623	1.65542	1.8271
		4.50333	1.84396	1.67216	1.72748	1.66778	1.65738	1.82823
		4.50667	1.84779	1.67163	1.72759	1.66739	1.6571	1.82951
		4.51	1.84852	1.67147	1.72947	1.66598	1.65933	1.82859
		4.51333	1.85093	1.6713	1.72865	1.66614	1.65893	1.8301
		4.51667	1.85205	1.67282	1.72988	1.66795	1.65782	1.83002
		4.52	1.85161	1.67185	1.73048	1.66723	1.65962	1.8307
		4.52333	1.85327	1.67239	1.73061	1.66765	1.66158	1.83051
		4.52667	1.8557	1.67337	1.72958	1.66915	1.66328	1.83001
		4.53	1.85408	1.67293	1.73185	1.66917	1.66398	1.8308
		4.53333	1.85137	1.67283	1.73228	1.66733	1.66645	1.83015
		4.53667	1.85031	1.67153	1.73272	1.66836	1.66307	1.82717
		4.54	1.84875	1.67223	1.73394	1.66705	1.66091	1.82661
		4.54333	1.84621	1.67132	1.73415	1.66635	1.66021	1.82717
		4.54667	1.84626	1.67219	1.73332	1.66654	1.66173	1.8267
		4.55	1.84919	1.67128	1.73219	1.66593	1.66236	1.82688
		4.55333	1.8498	1.67307	1.73135	1.66344	1.6648	1.82915
		4.55667	1.85069	1.67294	1.7315	1.66543	1.6639	1.82955
		4.56	1.84922	1.67316	1.73296	1.66405	1.66193	1.82882
		4.56333	1.85051	1.67312	1.73299	1.66435	1.65954	1.82958
		4.56667	1.84824	1.67396	1.7347	1.66585	1.65952	1.83088
		4.57	1.8482	1.6743	1.73643	1.66608	1.66022	1.83024
		4.57333	1.84607	1.67341	1.73558	1.66473	1.66136	1.83033
		4.57667	1.84863	1.67354	1.73411	1.66639	1.66169	1.82932
		4.58	1.84884	1.6735	1.73418	1.66498	1.66274	1.83012
		4.58333	1.84814	1.67406	1.73337	1.66312	1.66292	1.82952
		4.58667	1.84784	1.67367	1.73194	1.66347	1.66336	1.82893
		4.59	1.84863	1.67508	1.73146	1.66463	1.66159	1.82859
		4.59333	1.84705	1.67469	1.73351	1.66592	1.65817	1.83
		4.59667	1.84593	1.6752	1.73368	1.66696	1.66125	1.82903
		4.6	1.85027	1.6731	1.73478	1.66768	1.66058	1.8271
		4.60333	1.85125	1.67394	1.7341	1.66913	1.66064	1.82963
		4.60667	1.85377	1.67364	1.73424	1.66743	1.6615	1.83139
		4.61	1.85509	1.67471	1.73451	1.66838	1.66566	1.83119
		4.61333	1.85594	1.67387	1.73419	1.66735	1.66203	1.83125
		4.61667	1.85622	1.67471	1.73502	1.66871	1.66087	1.83243
		4.62	1.85729	1.67503	1.73805	1.66679	1.66155	1.83308
		4.62333	1.85623	1.67436	1.73908	1.66665	1.66219	1.83312
		4.62667	1.85668	1.6742	1.73777	1.66528	1.66233	1.83329
		4.63	1.85808	1.67371	1.73874	1.66692	1.66177	1.83259
		4.63333	1.8578	1.67504	1.73744	1.66543	1.66278	1.83192
		4.63667	1.85733	1.67447	1.73655	1.66617	1.66282	1.83096
		4.64	1.85991	1.67415	1.7364	1.66665	1.66262	1.8291
		4.64333	1.85934	1.67295	1.73551	1.66693	1.66237	1.82818
		4.64667	1.85794	1.67483	1.73567	1.66838	1.66442	1.82744
		4.65	1.85508	1.67535	1.736	1.67037	1.66262	1.82662
		4.65333	1.85439	1.67533	1.73405	1.67175	1.66322	1.82436
		4.65667	1.85108	1.67734	1.73443	1.67196	1.66241	1.82572
		4.66	1.85098	1.67805	1.73458	1.67353	1.66327	1.826
		4.66333	1.85266	1.6766	1.7359	1.67264	1.66314	1.82799
		4.66667	1.85486	1.67666	1.73561	1.67105	1.66592	1.83011
		4.67	1.85587	1.67684	1.73857	1.6723	1.66204	1.83486
		4.67333	1.85575	1.67676	1.73962	1.67382	1.66787	1.83594
		4.67667	1.85592	1.67689	1.74219	1.67197	1.6613	1.83639
		4.68	1.85369	1.67804	1.74108	1.67084	1.6632	1.83518
		4.68333	1.85189	1.67935	1.74208	1.67271	1.66071	1.83611
		4.68667	1.85042	1.68	1.74103	1.66986	1.66532	1.83397
		4.69	1.85143	1.68148	1.7399	1.66991	1.66147	1.83316
		4.69333	1.85145	1.68247	1.73905	1.67026	1.66731	1.83243
		4.69667	1.85094	1.6829	1.73838	1.67067	1.66611	1.83315
		4.7	1.85318	1.68243	1.73783	1.66911	1.66931	1.83075
		4.70333	1.8542	1.68158	1.73724	1.67026	1.6667	1.82696
		4.70667	1.85506	1.67992	1.73742	1.66976	1.66774	1.82642
		4.71	1.85566	1.68051	1.7379	1.66801	1.6666	1.82677
		4.71333	1.8559	1.68	1.737	1.67044	1.66544	1.82583
		4.71667	1.85561	1.67944	1.73572	1.67094	1.66478	1.82652
		4.72	1.85661	1.68013	1.73568	1.66804	1.66662	1.83031
		4.72333	1.85405	1.68064	1.73345	1.66892	1.66546	1.83105
		4.72667	1.85469	1.68122	1.73292	1.66981	1.66698	1.83293
		4.73	1.85822	1.68213	1.7345	1.66774	1.66497	1.83548
		4.73333	1.85823	1.68204	1.73666	1.66857	1.66669	1.83668
		4.73667	1.85999	1.68313	1.73834	1.67222	1.66715	1.83624
		4.74	1.86075	1.68249	1.73915	1.6706	1.66784	1.8369
		4.74333	1.86095	1.68147	1.73965	1.67231	1.66787	1.8345
		4.74667	1.86019	1.68221	1.73944	1.67262	1.67001	1.83206
		4.75	1.8599	1.68257	1.73876	1.67096	1.6696	1.83345
		4.75333	1.85729	1.68329	1.73819	1.67021	1.66764	1.83442
		4.75667	1.86126	1.68423	1.73921	1.66951	1.66813	1.83289
		4.76	1.85771	1.68541	1.73934	1.66695	1.66866	1.83419
		4.76333	1.85864	1.6848	1.74121	1.66678	1.66996	1.83528
		4.76667	1.8582	1.68517	1.74111	1.66641	1.66855	1.83255
		4.77	1.8598	1.68389	1.74105	1.66515	1.66967	1.83196
		4.77333	1.85992	1.68309	1.74031	1.66678	1.66989	1.83063
		4.77667	1.86354	1.68359	1.74186	1.6694	1.67064	1.82981
		4.78	1.86502	1.68299	1.74131	1.66712	1.67041	1.82988
		4.78333	1.86578	1.6829	1.74279	1.66861	1.67183	1.82967
		4.78667	1.86457	1.68425	1.74291	1.67109	1.67343	1.83024
		4.79	1.86307	1.68649	1.74536	1.66973	1.66868	1.83066
		4.79333	1.8609	1.68634	1.74441	1.67041	1.66956	1.83103
		4.79667	1.85975	1.6885	1.74446	1.67322	1.66495	1.83095
		4.8	1.85793	1.68883	1.74285	1.67383	1.66754	1.83219
		4.80333	1.85812	1.68829	1.74198	1.67286	1.66372	1.83266
		4.80667	1.85535	1.68751	1.74043	1.67456	1.66675	1.83556
		4.81	1.85375	1.68745	1.73918	1.67461	1.66455	1.83752
		4.81333	1.85233	1.68763	1.73934	1.67408	1.67011	1.83923
		4.81667	1.85373	1.68705	1.74135	1.67295	1.66749	1.84056
		4.82	1.85551	1.68797	1.74206	1.67314	1.67077	1.83949
		4.82333	1.86068	1.68913	1.74376	1.67428	1.67151	1.83821
		4.82667	1.8641	1.6891	1.7457	1.67228	1.67122	1.83877
		4.83	1.86498	1.68852	1.74504	1.67375	1.67011	1.83818
		4.83333	1.86406	1.68901	1.74566	1.6752	1.67012	1.83789
		4.83667	1.8612	1.68857	1.74541	1.6759	1.66674	1.83871
		4.84	1.85663	1.68814	1.74389	1.67337	1.66651	1.83802
		4.84333	1.8569	1.68808	1.74324	1.67358	1.66668	1.83748
		4.84667	1.85519	1.68781	1.74175	1.67302	1.66618	1.83541
		4.85	1.85601	1.68876	1.74002	1.6733	1.66697	1.83272
		4.85333	1.8579	1.6891	1.7397	1.67142	1.66776	1.83122
		4.85667	1.85973	1.68812	1.74139	1.67389	1.66723	1.83115
		4.86	1.85972	1.68801	1.74079	1.6738	1.66855	1.83007
		4.86333	1.86269	1.68799	1.74142	1.6744	1.66928	1.83099
		4.86667	1.86168	1.68788	1.74207	1.67129	1.66656	1.83135
		4.87	1.86029	1.68805	1.74355	1.67317	1.66927	1.83152
		4.87333	1.86002	1.68968	1.74134	1.67102	1.67047	1.8322
		4.87667	1.85691	1.68943	1.74221	1.67126	1.6704	1.83155
		4.88	1.85459	1.6894	1.74165	1.66978	1.67071	1.83042
		4.88333	1.8553	1.69056	1.74164	1.67075	1.67236	1.83291
		4.88667	1.85411	1.69136	1.74135	1.66907	1.6709	1.83351
		4.89	1.85261	1.68908	1.74202	1.66988	1.67054	1.83415
		4.89333	1.85423	1.69012	1.74135	1.67134	1.66968	1.8346
		4.89667	1.85445	1.69009	1.74355	1.67083	1.66563	1.83858
		4.9	1.85561	1.68812	1.74342	1.67212	1.66638	1.83548
		4.90333	1.8582	1.68749	1.74344	1.67427	1.6705	1.83441
		4.90667	1.85986	1.68982	1.74339	1.67436	1.67121	1.83521
		4.91	1.86041	1.68969	1.74429	1.67394	1.67039	1.8355
		4.91333	1.8614	1.69024	1.74452	1.67495	1.67509	1.8339
		4.91667	1.86047	1.69226	1.74414	1.67514	1.67426	1.83432
		4.92	1.85974	1.69106	1.74473	1.67312	1.67082	1.83499
		4.92333	1.85948	1.6897	1.74425	1.67238	1.67101	1.83377
		4.92667	1.85909	1.69033	1.7417	1.67216	1.672	1.83527
		4.93	1.85742	1.69055	1.74228	1.67333	1.67049	1.83591
		4.93333	1.85953	1.69062	1.74192	1.67307	1.67001	1.83606
		4.93667	1.85645	1.69128	1.74283	1.67521	1.66823	1.83564
		4.94	1.85606	1.6919	1.74265	1.6767	1.66814	1.83432
		4.94333	1.85753	1.69009	1.74774	1.67686	1.66895	1.83424
		4.94667	1.85897	1.69	1.74755	1.67484	1.66819	1.83298
		4.95	1.85785	1.68921	1.74872	1.67415	1.66933	1.83392
		4.95333	1.85999	1.68825	1.74494	1.6726	1.67257	1.83457
		4.95667	1.85998	1.68825	1.7469	1.67175	1.67022	1.83439
		4.96	1.85978	1.68973	1.74366	1.67058	1.66871	1.83271
		4.96333	1.86019	1.69056	1.74244	1.67264	1.67194	1.83135
		4.96667	1.8592	1.68918	1.74185	1.67336	1.671	1.83011
		4.97	1.86006	1.68977	1.74513	1.67282	1.67039	1.83081
		4.97333	1.85989	1.68993	1.74454	1.67178	1.67294	1.8313
		4.97667	1.86046	1.6906	1.74575	1.67186	1.67281	1.82941
		4.98	1.86063	1.69003	1.74657	1.67136	1.67216	1.83201
		4.98333	1.85899	1.69154	1.74643	1.67039	1.67147	1.83352
		4.98667	1.85956	1.69226	1.7476	1.67089	1.67095	1.83264
		4.99	1.85744	1.69217	1.74752	1.67288	1.67117	1.83446
		4.99333	1.85463	1.68982	1.74668	1.67246	1.67198	1.83647
		4.99667	1.85427	1.68964	1.74792	1.67156	1.6718	1.83478
		5	1.85501	1.68958	1.74891	1.67102	1.67437	1.83569
		5.00333	1.8557	1.68949	1.74682	1.67064	1.67405	1.83705
		5.00667	1.85907	1.68888	1.74654	1.67117	1.67326	1.8363
		5.01	1.85952	1.68985	1.74657	1.6727	1.67481	1.83559
		5.01333	1.85999	1.69022	1.7444	1.67287	1.67119	1.83775
		5.01667	1.85878	1.68978	1.74413	1.67598	1.66887	1.83637
		5.02	1.85821	1.68984	1.74386	1.67663	1.66769	1.83594
		5.02333	1.85639	1.69073	1.7447	1.67496	1.66731	1.83545
		5.02667	1.85879	1.69202	1.74452	1.67509	1.66519	1.83631
		5.03	1.85974	1.69255	1.74619	1.6748	1.66681	1.83506
		5.03333	1.86366	1.69201	1.74541	1.67308	1.66893	1.83814
		5.03667	1.86553	1.69131	1.74489	1.67296	1.66991	1.83756
		5.04	1.86838	1.6895	1.74544	1.67363	1.6704	1.83894
		5.04333	1.86808	1.68704	1.74674	1.6741	1.67165	1.83867
		5.04667	1.86788	1.68611	1.74469	1.67329	1.67278	1.83924
		5.05	1.8652	1.68491	1.74624	1.67431	1.67171	1.83643
		5.05333	1.86227	1.68531	1.7462	1.67544	1.67357	1.83824
		5.05667	1.85842	1.6859	1.74578	1.67682	1.67058	1.83687
		5.06	1.85832	1.68814	1.74573	1.67572	1.66774	1.83517
		5.06333	1.85806	1.6868	1.74769	1.6764	1.66679	1.8349
		5.06667	1.85604	1.68682	1.74651	1.67583	1.66714	1.83439
		5.07	1.85744	1.68491	1.74871	1.67505	1.66619	1.83138
		5.07333	1.855	1.68509	1.74978	1.67309	1.66874	1.83301
		5.07667	1.85442	1.68281	1.75013	1.67507	1.67127	1.83503
		5.08	1.85278	1.68248	1.74939	1.67689	1.67101	1.83284
		5.08333	1.85617	1.68267	1.74877	1.67592	1.66975	1.83345
		5.08667	1.86012	1.68391	1.74805	1.67673	1.67026	1.83559
		5.09	1.86496	1.68285	1.74755	1.67718	1.66928	1.83408
		5.09333	1.86564	1.68305	1.74573	1.67586	1.67001	1.83313
		5.09667	1.86779	1.68378	1.7466	1.67409	1.6712	1.83665
		5.1	1.86945	1.68478	1.74661	1.67503	1.67157	1.8359
		5.10333	1.86687	1.68341	1.74697	1.67513	1.67321	1.83618
		5.10667	1.86901	1.68438	1.74492	1.67372	1.67596	1.83744
		5.11	1.86994	1.68444	1.74491	1.67372	1.67523	1.83815
		5.11333	1.87022	1.68375	1.74401	1.67524	1.67425	1.83836
		5.11667	1.87166	1.68263	1.74588	1.67373	1.67672	1.84136
		5.12	1.86993	1.68402	1.74455	1.67184	1.67586	1.84232
		5.12333	1.87	1.68402	1.74666	1.67319	1.67631	1.84181
		5.12667	1.86906	1.68395	1.74674	1.67287	1.67712	1.84227
		5.13	1.86981	1.68462	1.74617	1.67198	1.67841	1.84213
		5.13333	1.86768	1.68547	1.74658	1.67155	1.67629	1.83921
		5.13667	1.86832	1.68591	1.74856	1.67246	1.67378	1.83892
		5.14	1.86758	1.68654	1.74887	1.67343	1.67141	1.83975
		5.14333	1.86698	1.68595	1.75037	1.67296	1.67392	1.84004
		5.14667	1.8648	1.68593	1.75264	1.67171	1.67562	1.84129
		5.15	1.86551	1.68575	1.75114	1.67363	1.67776	1.84375
		5.15333	1.86362	1.68467	1.74951	1.67328	1.67774	1.843
		5.15667	1.86532	1.68292	1.7478	1.67379	1.68087	1.8424
		5.16	1.86525	1.68405	1.74715	1.67479	1.67908	1.84465
		5.16333	1.86388	1.6848	1.74662	1.67801	1.6784	1.84371
		5.16667	1.86348	1.68451	1.74706	1.67861	1.67715	1.84251
		5.17	1.86487	1.68433	1.74626	1.67901	1.67979	1.84101
		5.17333	1.86048	1.68455	1.74654	1.67864	1.67767	1.83936
		5.17667	1.85811	1.68343	1.74863	1.67788	1.67918	1.83513
		5.18	1.8586	1.68224	1.74798	1.67648	1.67969	1.83408
		5.18333	1.85962	1.6819	1.74897	1.67698	1.68063	1.8352
		5.18667	1.8577	1.68269	1.74947	1.67693	1.67939	1.83596
		5.19	1.85849	1.68311	1.75115	1.67516	1.67961	1.83857
		5.19333	1.86133	1.68432	1.74793	1.67653	1.67572	1.84232
		5.19667	1.86083	1.68397	1.74663	1.67588	1.67672	1.84313
		5.2	1.85943	1.68363	1.74472	1.675	1.67491	1.84147
		5.20333	1.86309	1.68404	1.74669	1.67547	1.67684	1.84208
		5.20667	1.86348	1.68444	1.74654	1.67739	1.67574	1.84087
		5.21	1.86265	1.68335	1.74839	1.6756	1.67884	1.8414
		5.21333	1.86627	1.68387	1.74864	1.67618	1.67735	1.84166
		5.21667	1.86775	1.68492	1.74986	1.67722	1.67803	1.84311
		5.22	1.86884	1.68372	1.75073	1.67803	1.67737	1.84295
		5.22333	1.8684	1.68246	1.749	1.67442	1.67984	1.84461
		5.22667	1.86933	1.6822	1.74737	1.67485	1.67966	1.84341
		5.23	1.86791	1.68208	1.7489	1.67366	1.68012	1.84341
		5.23333	1.86787	1.68166	1.74779	1.67155	1.68225	1.84305
		5.23667	1.86807	1.68245	1.74638	1.67089	1.68041	1.84332
		5.24	1.87046	1.68341	1.74614	1.67458	1.68022	1.84309
		5.24333	1.86995	1.68332	1.74683	1.67497	1.67809	1.84146
		5.24667	1.87068	1.68414	1.74713	1.6748	1.6783	1.83957
		5.25	1.87083	1.68448	1.74877	1.67578	1.6777	1.84012
		5.25333	1.87019	1.68426	1.74905	1.67604	1.67935	1.84133
		5.25667	1.86982	1.68428	1.74917	1.67526	1.67583	1.84102
		5.26	1.87156	1.68545	1.7483	1.67462	1.68142	1.84139
		5.26333	1.87336	1.68463	1.74808	1.67711	1.67734	1.84186
		5.26667	1.87154	1.68474	1.74697	1.67658	1.67731	1.8415
		5.27	1.87153	1.68431	1.7471	1.67601	1.6766	1.83865
		5.27333	1.87306	1.68295	1.74608	1.67638	1.68157	1.83948
		5.27667	1.87178	1.68236	1.74679	1.67714	1.67697	1.84091
		5.28	1.87027	1.68202	1.74618	1.67503	1.68167	1.84182
		5.28333	1.86983	1.68175	1.7464	1.67709	1.67995	1.841
		5.28667	1.86828	1.68267	1.74645	1.67655	1.67932	1.84383
		5.29	1.86676	1.68419	1.75168	1.67543	1.6791	1.84112
		5.29333	1.8676	1.68314	1.75328	1.67484	1.68027	1.83964
		5.29667	1.86838	1.68339	1.75447	1.67601	1.67868	1.84049
		5.3	1.87152	1.68405	1.75471	1.67359	1.68025	1.83953
		5.30333	1.87049	1.68372	1.75338	1.6761	1.68283	1.83881
		5.30667	1.86833	1.68384	1.75017	1.67745	1.68332	1.83868
		5.31	1.87002	1.68519	1.74932	1.67821	1.68204	1.84028
		5.31333	1.86858	1.68499	1.74679	1.67785	1.68307	1.83971
		5.31667	1.86635	1.68462	1.74693	1.67932	1.68233	1.8423
		5.32	1.86771	1.68425	1.74777	1.67716	1.67825	1.84332
		5.32333	1.86958	1.68249	1.7494	1.67473	1.67638	1.84469
		5.32667	1.86897	1.68275	1.74987	1.67507	1.67756	1.84356
		5.33	1.86726	1.68415	1.75211	1.67611	1.67644	1.84291
		5.33333	1.86794	1.68256	1.75119	1.6753	1.67738	1.84084
		5.33667	1.86908	1.68229	1.75235	1.67491	1.67949	1.84035
		5.34	1.86855	1.68273	1.7507	1.67765	1.67923	1.83848
		5.34333	1.86736	1.68213	1.75169	1.67697	1.67891	1.83937
		5.34667	1.86753	1.6802	1.75081	1.67728	1.67904	1.84023
		5.35	1.86746	1.68158	1.75287	1.67845	1.67875	1.8412
		5.35333	1.86571	1.68016	1.75229	1.67887	1.67667	1.83916
		5.35667	1.86496	1.68084	1.75395	1.67665	1.67915	1.84008
		5.36	1.86407	1.68109	1.75106	1.67774	1.68013	1.84025
		5.36333	1.86651	1.68191	1.75172	1.6762	1.68175	1.83916
		5.36667	1.86896	1.68095	1.75143	1.67521	1.68186	1.83895
		5.37	1.87021	1.6815	1.75076	1.67666	1.68496	1.84087
		5.37333	1.86992	1.68132	1.74899	1.67891	1.68346	1.84256
		5.37667	1.87302	1.68042	1.75011	1.67831	1.68272	1.84142
		5.38	1.87291	1.68013	1.74931	1.67915	1.68307	1.84112
		5.38333	1.87055	1.68022	1.74917	1.67897	1.68371	1.84173
		5.38667	1.87231	1.68021	1.74875	1.6788	1.6841	1.84034
		5.39	1.87503	1.67859	1.75037	1.6771	1.68436	1.8396
		5.39333	1.8742	1.67947	1.75097	1.67785	1.68237	1.84158
		5.39667	1.87658	1.67874	1.75152	1.67706	1.68054	1.84137
		5.4	1.87657	1.67892	1.75136	1.67697	1.68004	1.84149
		5.40333	1.87572	1.67945	1.7517	1.67629	1.6778	1.84415
		5.40667	1.87592	1.67909	1.74966	1.67748	1.67813	1.84295
		5.41	1.87591	1.67908	1.75051	1.67761	1.68017	1.84089
		5.41333	1.8742	1.67985	1.74969	1.67721	1.6804	1.84223
		5.41667	1.87681	1.67861	1.75033	1.67758	1.6813	1.83963
		5.42	1.87637	1.67976	1.75136	1.6767	1.68394	1.83661
		5.42333	1.87404	1.68145	1.75299	1.67739	1.6822	1.83804
		5.42667	1.87534	1.68329	1.75247	1.67616	1.68104	1.83829
		5.43	1.87541	1.68373	1.75449	1.67684	1.68234	1.83853
		5.43333	1.87315	1.68441	1.7531	1.6774	1.68121	1.84179
		5.43667	1.87558	1.6837	1.75247	1.67807	1.679	1.84339
		5.44	1.87861	1.68373	1.75337	1.67571	1.67971	1.8424
		5.44333	1.87719	1.68099	1.75459	1.67575	1.67913	1.84265
		5.44667	1.87825	1.67979	1.75424	1.6766	1.68044	1.84228
		5.45	1.87734	1.67988	1.75354	1.67537	1.67878	1.83976
		5.45333	1.87439	1.67919	1.75299	1.67417	1.68092	1.84127
		5.45667	1.87468	1.67817	1.75208	1.67614	1.6814	1.8428
		5.46	1.87624	1.67904	1.74906	1.67802	1.68367	1.84172
		5.46333	1.8742	1.67955	1.74876	1.67845	1.68142	1.84258
		5.46667	1.87115	1.67937	1.74972	1.67939	1.68432	1.84354
		5.47	1.87283	1.67925	1.75166	1.68172	1.68259	1.84034
		5.47333	1.86845	1.67907	1.75291	1.67991	1.68446	1.83969
		5.47667	1.86436	1.67857	1.75566	1.67898	1.68362	1.84039
		5.48	1.865	1.67853	1.75704	1.67873	1.68562	1.83852
		5.48333	1.86833	1.67847	1.75777	1.68073	1.68582	1.83884
		5.48667	1.86716	1.67798	1.75625	1.68113	1.68824	1.84286
		5.49	1.86964	1.67834	1.75479	1.68227	1.68899	1.8425
		5.49333	1.86982	1.67956	1.75319	1.68321	1.68863	1.84126
		5.49667	1.87238	1.67923	1.75166	1.68432	1.68492	1.84382
		5.5	1.87505	1.67904	1.75067	1.68202	1.68462	1.84328
		5.50333	1.87496	1.67944	1.74964	1.68087	1.68254	1.8394
		5.50667	1.87526	1.67983	1.7503	1.68013	1.68187	1.83945
		5.51	1.87786	1.6791	1.75084	1.67966	1.6803	1.83966
		5.51333	1.87904	1.67982	1.75135	1.67791	1.67892	1.8388
		5.51667	1.87529	1.67966	1.75156	1.67747	1.67615	1.8403
		5.52	1.8778	1.68173	1.75196	1.67737	1.6778	1.84187
		5.52333	1.87966	1.68177	1.75253	1.67697	1.67613	1.84056
		5.52667	1.878	1.68147	1.75253	1.6748	1.68025	1.84404
		5.53	1.87519	1.67987	1.7513	1.67427	1.68112	1.84435
		5.53333	1.87563	1.68053	1.75239	1.67547	1.68402	1.84249
		5.53667	1.87553	1.67886	1.7545	1.67812	1.68184	1.84324
		5.54	1.87186	1.6786	1.75418	1.67867	1.68116	1.84386
		5.54333	1.87302	1.67843	1.75463	1.68041	1.67993	1.84191
		5.54667	1.8735	1.68043	1.75616	1.68147	1.68227	1.84049
		5.55	1.87444	1.6794	1.75646	1.68141	1.68105	1.84223
		5.55333	1.87549	1.68054	1.75409	1.67942	1.68354	1.84158
		5.55667	1.88022	1.68121	1.75496	1.6814	1.68572	1.84255
		5.56	1.87916	1.68194	1.75479	1.68272	1.6868	1.8433
		5.56333	1.87925	1.67994	1.75674	1.68338	1.68791	1.8438
		5.56667	1.87803	1.68122	1.75628	1.68366	1.69121	1.84308
		5.57	1.87419	1.68001	1.7587	1.68119	1.6885	1.84325
		5.57333	1.87034	1.67872	1.75781	1.68099	1.68773	1.84367
		5.57667	1.87072	1.67703	1.75764	1.67907	1.68532	1.84423
		5.58	1.86969	1.67847	1.75452	1.67817	1.68374	1.84322
		5.58333	1.87382	1.67779	1.75275	1.67874	1.68152	1.84398
		5.58667	1.87671	1.67862	1.75337	1.68083	1.68199	1.84427
		5.59	1.8801	1.67909	1.75358	1.67809	1.68175	1.844
		5.59333	1.8818	1.67991	1.75317	1.67948	1.68227	1.84299
		5.59667	1.88323	1.6794	1.7539	1.67883	1.68271	1.84498
		5.6	1.88059	1.6789	1.75611	1.67791	1.6819	1.84284
		5.60333	1.87797	1.67862	1.7553	1.67744	1.68344	1.842
		5.60667	1.8769	1.67763	1.75473	1.6796	1.68484	1.84106
		5.61	1.87802	1.67787	1.75513	1.67931	1.6841	1.84062
		5.61333	1.87564	1.67785	1.75506	1.68024	1.68487	1.83793
		5.61667	1.87375	1.67937	1.75589	1.68091	1.68717	1.8387
		5.62	1.87398	1.67883	1.75426	1.68152	1.68555	1.84043
		5.62333	1.87115	1.68	1.75553	1.68238	1.68545	1.84254
		5.62667	1.86734	1.68023	1.75611	1.68124	1.68502	1.8426
		5.63	1.86914	1.67885	1.75633	1.68226	1.68462	1.84377
		5.63333	1.87182	1.67869	1.7565	1.68122	1.68394	1.84571
		5.63667	1.87356	1.67772	1.75731	1.68144	1.68272	1.84421
		5.64	1.8749	1.67764	1.75531	1.67922	1.68152	1.84232
		5.64333	1.87532	1.67725	1.75557	1.68035	1.68453	1.84337
		5.64667	1.87529	1.67875	1.75493	1.67944	1.68479	1.84244
		5.65	1.87452	1.67818	1.75404	1.6794	1.68544	1.84112
		5.65333	1.87373	1.67867	1.75315	1.67899	1.68814	1.84352
		5.65667	1.87706	1.67822	1.7539	1.67915	1.68808	1.8432
		5.66	1.8799	1.67887	1.75409	1.67867	1.68694	1.8419
		5.66333	1.87994	1.67931	1.75441	1.67879	1.68598	1.84397
		5.66667	1.87929	1.67935	1.75362	1.68044	1.68375	1.84532
		5.67	1.87859	1.68005	1.75489	1.67947	1.68145	1.8443
		5.67333	1.87527	1.67991	1.7556	1.68203	1.6818	1.84618
		5.67667	1.87446	1.68052	1.75491	1.68179	1.68141	1.84483
		5.68	1.87489	1.67926	1.75531	1.68099	1.68209	1.84394
		5.68333	1.87301	1.67803	1.75571	1.67959	1.68458	1.8431
		5.68667	1.87264	1.67883	1.75524	1.68169	1.68647	1.8436
		5.69	1.87321	1.6787	1.75409	1.6801	1.68601	1.84285
		5.69333	1.8719	1.67784	1.75558	1.68336	1.68577	1.84429
		5.69667	1.87055	1.67724	1.7556	1.68434	1.68662	1.84435
		5.7	1.87434	1.67825	1.75654	1.6847	1.68415	1.84362
		5.70333	1.87789	1.67846	1.75735	1.6839	1.68591	1.84235
		5.70667	1.87735	1.67905	1.75689	1.68412	1.68705	1.84218
		5.71	1.87907	1.67952	1.75669	1.67967	1.68805	1.84565
		5.71333	1.8819	1.68089	1.7561	1.6789	1.68702	1.84566
		5.71667	1.88281	1.68132	1.75482	1.68106	1.68724	1.84605
		5.72	1.88181	1.68021	1.75524	1.68076	1.6873	1.84584
		5.72333	1.88268	1.68061	1.75566	1.6816	1.68855	1.84682
		5.72667	1.88044	1.68076	1.75451	1.68347	1.68862	1.84572
		5.73	1.87953	1.68038	1.75413	1.68393	1.68729	1.84435
		5.73333	1.8782	1.67936	1.75361	1.68248	1.68675	1.84598
		5.73667	1.87751	1.67978	1.75306	1.68242	1.685	1.84678
		5.74	1.87944	1.68051	1.75251	1.68306	1.68333	1.84512
		5.74333	1.88036	1.6793	1.7531	1.68169	1.68322	1.84191
		5.74667	1.87944	1.67933	1.75367	1.68209	1.68604	1.84325
		5.75	1.87758	1.68036	1.75421	1.68137	1.68698	1.84125
		5.75333	1.87809	1.67991	1.75387	1.68093	1.69051	1.84026
		5.75667	1.87595	1.67878	1.75517	1.67902	1.68586	1.84254
		5.76	1.87534	1.67883	1.75414	1.67987	1.68554	1.84448
		5.76333	1.87384	1.67922	1.75468	1.68036	1.68678	1.84572
		5.76667	1.87389	1.67835	1.75621	1.68123	1.68357	1.84609
		5.77	1.87116	1.67816	1.75567	1.6829	1.68254	1.8471
		5.77333	1.86819	1.67781	1.75542	1.68415	1.68869	1.84559
		5.77667	1.86842	1.67953	1.7565	1.6842	1.68879	1.84524
		5.78	1.86963	1.67884	1.75543	1.6842	1.68835	1.84266
		5.78333	1.87102	1.67949	1.75452	1.68353	1.69265	1.84224
		5.78667	1.87202	1.67922	1.75575	1.6824	1.69152	1.84247
		5.79	1.87637	1.67922	1.75485	1.68125	1.68839	1.84465
		5.79333	1.87743	1.6771	1.75494	1.68045	1.68971	1.84603
		5.79667	1.87682	1.67721	1.75468	1.67995	1.68956	1.84799
		5.8	1.87797	1.67635	1.75403	1.68073	1.68925	1.8507
		5.80333	1.87862	1.67597	1.75445	1.68096	1.68886	1.84993
		5.80667	1.87802	1.67675	1.75581	1.6811	1.68953	1.84675
		5.81	1.87965	1.67738	1.75555	1.68205	1.68812	1.84658
		5.81333	1.88097	1.67729	1.75732	1.68063	1.68875	1.846
		5.81667	1.88005	1.67809	1.75789	1.6799	1.68754	1.84471
		5.82	1.8814	1.67954	1.75818	1.68049	1.68723	1.84496
		5.82333	1.88179	1.67992	1.75903	1.68142	1.68961	1.84688
		5.82667	1.88207	1.67987	1.75592	1.68284	1.6905	1.84704
		5.83	1.8818	1.67944	1.75488	1.68589	1.68886	1.84884
		5.83333	1.88126	1.67942	1.75126	1.68648	1.69089	1.84904
		5.83667	1.88	1.67985	1.7505	1.68403	1.69224	1.84746
		5.84	1.88061	1.67816	1.74979	1.68376	1.69142	1.8457
		5.84333	1.87791	1.67801	1.75425	1.68309	1.68912	1.84678
		5.84667	1.87802	1.67946	1.75366	1.68146	1.69034	1.84486
		5.85	1.87971	1.67772	1.75625	1.68013	1.68896	1.846
		5.85333	1.87878	1.67691	1.75545	1.68288	1.68958	1.84941
		5.85667	1.87837	1.67716	1.75455	1.68331	1.68886	1.85114
		5.86	1.88054	1.6783	1.75251	1.68188	1.68814	1.84981
		5.86333	1.88032	1.67739	1.75375	1.68263	1.68547	1.85062
		5.86667	1.8793	1.67872	1.75666	1.68338	1.68523	1.8481
		5.87	1.88101	1.67931	1.75684	1.68327	1.68386	1.84718
		5.87333	1.87827	1.67991	1.75856	1.68295	1.68631	1.8476
		5.87667	1.8744	1.67957	1.76017	1.68552	1.68859	1.84766
		5.88	1.8749	1.68084	1.75888	1.68378	1.69241	1.84769
		5.88333	1.87756	1.68159	1.75695	1.68349	1.69057	1.85084
		5.88667	1.87726	1.68015	1.75741	1.68243	1.69131	1.85148
		5.89	1.87859	1.67978	1.75583	1.683	1.68794	1.85143
		5.89333	1.88356	1.67957	1.75567	1.68248	1.68749	1.85101
		5.89667	1.88554	1.67869	1.75784	1.68142	1.68534	1.84972
		5.9	1.88351	1.6772	1.75814	1.68125	1.68856	1.84588
		5.90333	1.88375	1.67865	1.75854	1.6827	1.68738	1.84694
		5.90667	1.88444	1.67895	1.75882	1.68383	1.68747	1.84531
		5.91	1.88254	1.67857	1.7587	1.68196	1.68856	1.84583
		5.91333	1.87939	1.67901	1.75663	1.68334	1.68881	1.84629
		5.91667	1.8792	1.67936	1.7563	1.68414	1.68982	1.84844
		5.92	1.88016	1.67911	1.75613	1.68338	1.69076	1.84414
		5.92333	1.87945	1.67924	1.75645	1.68112	1.69142	1.84598
		5.92667	1.87962	1.68008	1.75729	1.68223	1.69067	1.8468
		5.93	1.88023	1.68003	1.7587	1.68141	1.69001	1.8465
		5.93333	1.88142	1.68161	1.75786	1.68251	1.68916	1.84702
		5.93667	1.88033	1.6812	1.7581	1.68268	1.68815	1.84828
		5.94	1.88274	1.68069	1.7585	1.68296	1.69064	1.84716
		5.94333	1.88368	1.68129	1.75732	1.6835	1.69141	1.84611
		5.94667	1.88504	1.6816	1.7564	1.68585	1.69124	1.84739
		5.95	1.88217	1.67976	1.75663	1.68761	1.69259	1.84599
		5.95333	1.88171	1.67988	1.75491	1.68883	1.69403	1.84725
		5.95667	1.87988	1.68077	1.75525	1.68837	1.69294	1.84818
		5.96	1.87761	1.67928	1.75379	1.68813	1.69205	1.84773
		5.96333	1.87477	1.67902	1.75686	1.68557	1.69281	1.84703
		5.96667	1.87599	1.67978	1.75909	1.68389	1.69027	1.84612
		5.97	1.87501	1.67878	1.76071	1.6838	1.69027	1.84605
		5.97333	1.87518	1.67742	1.75919	1.68501	1.68842	1.84775
		5.97667	1.87527	1.67656	1.75808	1.68528	1.68993	1.8487
		5.98	1.87693	1.67588	1.7553	1.68732	1.68986	1.84967
		5.98333	1.87777	1.67491	1.7539	1.68614	1.68864	1.85085
		5.98667	1.87977	1.67629	1.75377	1.68226	1.68915	1.85028
		5.99	1.87867	1.6774	1.7565	1.68354	1.69074	1.84782
		5.99333	1.88074	1.6791	1.75841	1.68276	1.69128	1.84766
		5.99667	1.88449	1.67854	1.76037	1.68147	1.69169	1.84796
		6	1.88333	1.67921	1.76034	1.68172	1.69335	1.84863
		6.00333	1.88164	1.67831	1.76099	1.68512	1.69143	1.84841
		6.00667	1.88356	1.67724	1.75787	1.68385	1.69362	1.84642
		6.01	1.88367	1.67718	1.75745	1.68357	1.69271	1.84745
		6.01333	1.88058	1.67767	1.7569	1.68465	1.6929	1.84796
		6.01667	1.88075	1.67766	1.75641	1.68592	1.69539	1.84842
		6.02	1.88136	1.67731	1.75559	1.68597	1.69815	1.84969
		6.02333	1.88198	1.67802	1.75773	1.68472	1.6975	1.85238
		6.02667	1.88163	1.67596	1.75944	1.68588	1.6978	1.85039
		6.03	1.8792	1.67662	1.75887	1.68528	1.69901	1.85054
		6.03333	1.87851	1.6774	1.75781	1.68274	1.69606	1.84875
		6.03667	1.87626	1.67823	1.75677	1.68068	1.69378	1.84679
		6.04	1.8752	1.67758	1.75597	1.68114	1.69272	1.84652
		6.04333	1.87671	1.6787	1.75517	1.68098	1.69383	1.84654
		6.04667	1.87593	1.67919	1.7537	1.68144	1.69275	1.84351
		6.05	1.87635	1.67756	1.75686	1.68353	1.69588	1.84614
		6.05333	1.8796	1.67595	1.75695	1.68453	1.69486	1.84809
		6.05667	1.88005	1.6764	1.75757	1.68467	1.69636	1.84852
		6.06	1.87954	1.67672	1.75799	1.68521	1.69447	1.8492
		6.06333	1.88294	1.67675	1.75734	1.68562	1.69538	1.85303
		6.06667	1.88401	1.67807	1.75471	1.68396	1.69507	1.8512
		6.07	1.88428	1.68019	1.75548	1.68417	1.69794	1.85075
		6.07333	1.88459	1.68088	1.75556	1.68353	1.69542	1.85055
		6.07667	1.88318	1.68062	1.7559	1.68284	1.69699	1.85176
		6.08	1.8809	1.68138	1.75786	1.68318	1.6972	1.84904
		6.08333	1.88023	1.68214	1.76006	1.68359	1.69524	1.84749
		6.08667	1.87954	1.68282	1.76039	1.68465	1.6948	1.84772
		6.09	1.87839	1.68278	1.75975	1.68614	1.69832	1.84751
		6.09333	1.87596	1.6838	1.75734	1.686	1.69689	1.84706
		6.09667	1.87929	1.68304	1.75674	1.68408	1.69427	1.8481
		6.1	1.88177	1.6824	1.75512	1.68469	1.69512	1.84894
		6.10333	1.88258	1.68224	1.75465	1.68449	1.69589	1.84975
		6.10667	1.88183	1.68102	1.75455	1.68495	1.69314	1.84857
		6.11	1.88626	1.68137	1.75855	1.6856	1.69426	1.84881
		6.11333	1.88482	1.68114	1.75857	1.68689	1.69543	1.84723
		6.11667	1.88605	1.6801	1.75938	1.68664	1.69484	1.85025
		6.12	1.88677	1.67959	1.75875	1.68709	1.69456	1.84915
		6.12333	1.88818	1.67946	1.75806	1.68728	1.69422	1.85068
		6.12667	1.88668	1.67885	1.75684	1.68591	1.69379	1.85133
		6.13	1.88544	1.67908	1.75762	1.68697	1.69514	1.85195
		6.13333	1.88228	1.67969	1.75722	1.68703	1.69524	1.84979
		6.13667	1.88207	1.67983	1.75898	1.68572	1.69319	1.85164
		6.14	1.881	1.68085	1.75778	1.68404	1.69283	1.85139
		6.14333	1.88064	1.68017	1.75987	1.68525	1.69312	1.84986
		6.14667	1.88137	1.67986	1.76058	1.68325	1.6923	1.85007
		6.15	1.87891	1.68034	1.7613	1.68287	1.69177	1.85164
		6.15333	1.87788	1.6801	1.76141	1.68359	1.69394	1.85041
		6.15667	1.87912	1.68029	1.76429	1.68365	1.69534	1.85079
		6.16	1.87993	1.68248	1.76141	1.68182	1.69473	1.85242
		6.16333	1.88175	1.68218	1.76122	1.68336	1.69269	1.85162
		6.16667	1.88658	1.68216	1.76164	1.68227	1.69488	1.85046
		6.17	1.88607	1.68427	1.76189	1.681	1.69368	1.8504
		6.17333	1.88671	1.68394	1.76205	1.68196	1.69436	1.85026
		6.17667	1.887	1.68311	1.7629	1.68318	1.69402	1.84895
		6.18	1.88512	1.68325	1.76302	1.68142	1.69552	1.8492
		6.18333	1.88427	1.68191	1.76231	1.68225	1.69588	1.8475
		6.18667	1.88426	1.67956	1.76316	1.68391	1.69867	1.84781
		6.19	1.88199	1.67941	1.76328	1.68347	1.69658	1.84847
		6.19333	1.87939	1.67846	1.76301	1.68514	1.69697	1.8474
		6.19667	1.88066	1.67831	1.76329	1.68662	1.70047	1.84773
		6.2	1.87899	1.6788	1.76526	1.68617	1.69782	1.84982
		6.20333	1.88081	1.67939	1.76567	1.68483	1.69455	1.85072
		6.20667	1.88338	1.67965	1.76543	1.6848	1.69525	1.84805
		6.21	1.88595	1.67928	1.76623	1.68459	1.69592	1.85036
		6.21333	1.88835	1.67901	1.76799	1.68332	1.69461	1.8509
		6.21667	1.88914	1.68062	1.76695	1.68418	1.69527	1.85031
		6.22	1.88824	1.68107	1.7675	1.68531	1.69723	1.8492
		6.22333	1.88792	1.68105	1.76763	1.68537	1.69865	1.8519
		6.22667	1.88923	1.68111	1.76708	1.68532	1.70037	1.85032
		6.23	1.88868	1.68161	1.76615	1.68685	1.69972	1.85126
		6.23333	1.8908	1.6801	1.76695	1.68592	1.70083	1.85119
		6.23667	1.89192	1.67909	1.76596	1.68491	1.69926	1.84955
		6.24	1.89293	1.67821	1.76568	1.68407	1.69911	1.84885
		6.24333	1.89162	1.6782	1.76775	1.68335	1.69774	1.8502
		6.24667	1.8907	1.6785	1.76811	1.68148	1.69734	1.85038
		6.25	1.88958	1.67892	1.76966	1.68498	1.69601	1.85077
		6.25333	1.88986	1.68007	1.76838	1.68627	1.6963	1.85196
		6.25667	1.88948	1.68203	1.76757	1.68866	1.69871	1.85006
		6.26	1.88994	1.68323	1.76467	1.68944	1.69749	1.85132
		6.26333	1.88868	1.68405	1.76399	1.69227	1.69783	1.85179
		6.26667	1.88924	1.68406	1.76046	1.6906	1.70017	1.85183
		6.27	1.88727	1.68314	1.76123	1.69073	1.70117	1.85163
		6.27333	1.88565	1.68204	1.76215	1.68927	1.69787	1.85383
		6.27667	1.8845	1.68297	1.76351	1.68839	1.69756	1.85181
		6.28	1.88137	1.68231	1.76318	1.68699	1.69764	1.85093
		6.28333	1.88066	1.68192	1.76551	1.68641	1.69703	1.85125
		6.28667	1.88336	1.6823	1.76376	1.68363	1.69728	1.85216
		6.29	1.88404	1.68258	1.76683	1.68308	1.69744	1.85297
		6.29333	1.88249	1.68109	1.76775	1.68464	1.69832	1.85348
		6.29667	1.88589	1.68061	1.76609	1.68452	1.69882	1.85372
		6.3	1.88504	1.68014	1.76612	1.68469	1.6985	1.85343
		6.30333	1.88299	1.68059	1.76805	1.68809	1.69574	1.85367
		6.30667	1.8834	1.68093	1.7642	1.69009	1.69792	1.85072
		6.31	1.88657	1.68181	1.76362	1.68823	1.69991	1.85013
		6.31333	1.887	1.68189	1.764	1.6899	1.70051	1.84977
		6.31667	1.88936	1.68308	1.76415	1.68875	1.70096	1.85131
		6.32	1.89123	1.68266	1.76314	1.68742	1.70407	1.84957
		6.32333	1.89216	1.68346	1.76485	1.68805	1.70227	1.85172
		6.32667	1.88947	1.68193	1.764	1.68856	1.70055	1.8524
		6.33	1.89133	1.68213	1.76576	1.68803	1.69989	1.85123
		6.33333	1.8901	1.6823	1.76636	1.68962	1.70108	1.84961
		6.33667	1.89177	1.68254	1.76729	1.68922	1.699	1.85201
		6.34	1.88936	1.68135	1.76633	1.6893	1.69945	1.85226
		6.34333	1.89112	1.68257	1.76644	1.68965	1.69697	1.85135
		6.34667	1.88833	1.6833	1.76585	1.68701	1.69434	1.85069
		6.35	1.88954	1.68195	1.76333	1.68763	1.69228	1.85146
		6.35333	1.88551	1.68247	1.76257	1.68867	1.69321	1.85028
		6.35667	1.88734	1.68289	1.76224	1.68519	1.69436	1.85027
		6.36	1.88817	1.68122	1.76338	1.68573	1.69857	1.85034
		6.36333	1.88969	1.68131	1.76434	1.68601	1.69943	1.85246
		6.36667	1.88738	1.68254	1.76601	1.68352	1.69946	1.85181
		6.37	1.8882	1.68155	1.76813	1.68309	1.70004	1.85215
		6.37333	1.89011	1.68196	1.76822	1.68381	1.69983	1.852
		6.37667	1.88938	1.68274	1.7665	1.68452	1.69819	1.8528
		6.38	1.88793	1.68328	1.76586	1.68433	1.69851	1.85375
		6.38333	1.8885	1.68366	1.76652	1.68733	1.69842	1.85356
		6.38667	1.8907	1.68523	1.76366	1.68826	1.69939	1.85349
		6.39	1.88955	1.68422	1.76421	1.68899	1.69946	1.85376
		6.39333	1.89063	1.68577	1.76584	1.68739	1.69851	1.85361
		6.39667	1.89037	1.68401	1.76539	1.68976	1.70124	1.852
		6.4	1.89123	1.68247	1.76324	1.68966	1.70253	1.85195
		6.40333	1.88976	1.68098	1.76365	1.6883	1.70062	1.85268
		6.40667	1.89076	1.68186	1.76407	1.68883	1.70094	1.85105
		6.41	1.88874	1.68108	1.76317	1.68937	1.70275	1.85213
		6.41333	1.88967	1.68232	1.7621	1.68759	1.70358	1.85198
		6.41667	1.8885	1.68291	1.76093	1.68657	1.70353	1.85269
		6.42	1.88602	1.68341	1.76323	1.68869	1.70317	1.85364
		6.42333	1.88132	1.68354	1.76247	1.68752	1.70086	1.85784
		6.42667	1.87945	1.68242	1.76157	1.68812	1.69967	1.85676
		6.43	1.87809	1.68238	1.76304	1.69008	1.69731	1.8568
		6.43333	1.87997	1.68306	1.76396	1.68998	1.6975	1.85618
		6.43667	1.88117	1.68377	1.76285	1.68894	1.6989	1.85408
		6.44	1.88445	1.68279	1.76288	1.6909	1.70095	1.85143
		6.44333	1.88757	1.68419	1.76536	1.6907	1.70306	1.85375
		6.44667	1.88774	1.68334	1.76458	1.68899	1.70224	1.85294
		6.45	1.88591	1.68317	1.76456	1.68949	1.69999	1.85438
		6.45333	1.88709	1.6827	1.76486	1.68865	1.70155	1.85353
		6.45667	1.8864	1.68438	1.76556	1.68843	1.70246	1.85419
		6.46	1.88578	1.68395	1.76295	1.68846	1.69788	1.85261
		6.46333	1.8881	1.68458	1.76323	1.69137	1.7019	1.85487
		6.46667	1.88845	1.68595	1.76437	1.69082	1.70196	1.85262
		6.47	1.8877	1.6845	1.76325	1.69181	1.70484	1.85333
		6.47333	1.88808	1.6831	1.76094	1.6904	1.70308	1.85319
		6.47667	1.88897	1.68275	1.76186	1.68917	1.70743	1.85276
		6.48	1.88616	1.68294	1.76386	1.68879	1.70409	1.85254
		6.48333	1.88843	1.68238	1.76329	1.68738	1.70711	1.85532
		6.48667	1.88887	1.68389	1.76467	1.68736	1.70256	1.85293
		6.49	1.89081	1.68371	1.7665	1.68821	1.70513	1.85247
		6.49333	1.89196	1.6832	1.7655	1.68875	1.70453	1.85237
		6.49667	1.89267	1.68283	1.76456	1.68718	1.7058	1.85256
		6.5	1.89125	1.68176	1.76618	1.68848	1.7053	1.85147
		6.50333	1.8915	1.68185	1.76509	1.68957	1.70611	1.85598
		6.50667	1.88998	1.68337	1.76523	1.68928	1.70406	1.8555
		6.51	1.88831	1.68443	1.76628	1.68866	1.70666	1.8547
		6.51333	1.89145	1.68401	1.76686	1.68991	1.70707	1.85374
		6.51667	1.892	1.6843	1.76671	1.69119	1.7074	1.85286
		6.52	1.89387	1.68337	1.76751	1.69002	1.70731	1.8496
		6.52333	1.89312	1.68158	1.76742	1.6912	1.7072	1.84987
		6.52667	1.892	1.68203	1.76837	1.69218	1.70555	1.85045
		6.53	1.88984	1.68194	1.76762	1.68849	1.70488	1.8501
		6.53333	1.88898	1.68279	1.76537	1.68893	1.70344	1.84999
		6.53667	1.88581	1.68292	1.76513	1.6886	1.70276	1.85167
		6.54	1.88679	1.68397	1.76499	1.68812	1.70291	1.85289
		6.54333	1.88975	1.68317	1.76343	1.68871	1.70271	1.85228
		6.54667	1.88978	1.68474	1.76334	1.69089	1.70203	1.85184
		6.55	1.88961	1.68399	1.76482	1.68959	1.7013	1.85335
		6.55333	1.892	1.68445	1.76426	1.69061	1.69971	1.85393
		6.55667	1.89136	1.68476	1.76519	1.69037	1.70077	1.85384
		6.56	1.8891	1.68475	1.7648	1.68931	1.70006	1.85394
		6.56333	1.88937	1.68431	1.76433	1.68908	1.69917	1.85396
		6.56667	1.89077	1.68333	1.76249	1.69015	1.70042	1.85557
		6.57	1.89108	1.68395	1.76235	1.68944	1.70195	1.8544
		6.57333	1.89295	1.68374	1.7599	1.6895	1.70069	1.85432
		6.57667	1.8951	1.68438	1.76092	1.68937	1.69793	1.85406
		6.58	1.89589	1.68499	1.76119	1.69006	1.69788	1.85698
		6.58333	1.89389	1.68704	1.7624	1.6903	1.69828	1.85514
		6.58667	1.89332	1.68752	1.76251	1.69018	1.69966	1.85626
		6.59	1.89195	1.68712	1.76469	1.68859	1.69908	1.85684
		6.59333	1.8887	1.68748	1.76593	1.68799	1.70137	1.85699
		6.59667	1.88826	1.68622	1.76574	1.68847	1.70325	1.85701
		6.6	1.89073	1.68474	1.76526	1.68586	1.70014	1.85468
		6.60333	1.89346	1.6848	1.76609	1.68826	1.70122	1.85474
		6.60667	1.89426	1.68525	1.76448	1.68962	1.702	1.85472
		6.61	1.89629	1.68447	1.7624	1.6913	1.70361	1.85705
		6.61333	1.89707	1.68429	1.76289	1.69213	1.70495	1.85436
		6.61667	1.89398	1.68638	1.76347	1.69388	1.70804	1.85672
		6.62	1.89051	1.68559	1.76316	1.69005	1.70761	1.85612
		6.62333	1.88866	1.68515	1.76558	1.68961	1.70704	1.85548
		6.62667	1.88818	1.6885	1.76724	1.68877	1.70602	1.8535
		6.63	1.88824	1.68868	1.76706	1.68732	1.70448	1.85498
		6.63333	1.88903	1.68732	1.76589	1.68666	1.70561	1.85488
		6.63667	1.89023	1.68697	1.76537	1.68827	1.70316	1.85528
		6.64	1.89245	1.6875	1.76414	1.68834	1.70553	1.85534
		6.64333	1.89296	1.68465	1.76288	1.68807	1.7038	1.85577
		6.64667	1.89451	1.68556	1.76144	1.68886	1.70525	1.85489
		6.65	1.89665	1.68573	1.76218	1.68895	1.70378	1.85536
		6.65333	1.8966	1.68624	1.76193	1.68883	1.70391	1.85523
		6.65667	1.89412	1.68654	1.76144	1.68902	1.70268	1.85412
[truncated: 19,152 more rows]
