# Supplementary material for: Evolution towards simplicity in bacterial small heat shock protein system
Source: eLife. 2023 Dec 8;12:RP89813. doi: 10.7554/eLife.89813 (PMC10708888; doi:10.7554/eLife.89813)
Supplement: Figure 6—source data 6. [file elife-89813-fig6-data6.xlsx]

## Sheet: Arkusz1
			Response [nm]
		time[min]	5uM IbpA E.coli WT +Hsp70 repeat 1	5uM IbpA E.coli WT +Hsp70 repeat 2	5uM IbpA E.coli WT +Hsp70 repeat 3	5uM IbpA WT + Hsp70 repeat 4	5uM IbpA WT + Hsp70 repeat 5	5uM IbpA WT -Hsp70 repeat 1	5uM IbpA WT -Hsp70 repeat 2	5uM IbpA E.coli WT - Hsp70 repeat 3	5uM IbpA E.coli WT - Hsp70 repeat 4	5uM IbpA E.coli WT - Hsp70 repeat 5	For data for 'No sHsp + Hsp70' see Fig. 6 - source data 4
		0	0.266578	0.334503	0.178195	0.30861	0.280357	0.211645	0.156239	0.250432	0.403022	0.41275
		0.003333	0.26848	0.329346	0.1784	0.310726	0.291227	0.208575	0.164355	0.252368	0.399655	0.411205
		0.006667	0.267481	0.326508	0.181637	0.313822	0.29249	0.206318	0.167142	0.247655	0.394834	0.408654
		0.01	0.265718	0.324607	0.181251	0.317138	0.297817	0.204663	0.170537	0.249762	0.392116	0.410021
		0.013333	0.26703	0.322549	0.181354	0.317428	0.300269	0.203463	0.173104	0.250461	0.391206	0.409257
		0.016667	0.26646	0.319367	0.182538	0.318827	0.301945	0.202424	0.174897	0.250802	0.387467	0.40794
		0.02	0.265444	0.319575	0.184034	0.319669	0.301617	0.19998	0.175478	0.250411	0.385937	0.407479
		0.023333	0.267619	0.319396	0.183911	0.319231	0.303934	0.198924	0.177757	0.252273	0.384385	0.405907
		0.026667	0.269648	0.319224	0.186427	0.31923	0.300852	0.197872	0.180101	0.250338	0.382012	0.402074
		0.03	0.268692	0.321444	0.188897	0.323276	0.298433	0.197893	0.181543	0.251077	0.378066	0.400422
		0.033333	0.270417	0.321558	0.189177	0.325912	0.29846	0.196645	0.181494	0.250903	0.37732	0.400114
		0.036667	0.272155	0.321817	0.187858	0.329168	0.298684	0.199046	0.181845	0.250683	0.37509	0.398668
		0.04	0.269672	0.322444	0.185062	0.332154	0.29692	0.198377	0.181381	0.252746	0.372488	0.399291
		0.043333	0.270401	0.320352	0.1836	0.331405	0.2994	0.199735	0.180865	0.254324	0.369334	0.398033
		0.046667	0.271713	0.317069	0.183236	0.331407	0.301246	0.198839	0.180288	0.253472	0.366838	0.39585
		0.05	0.27022	0.317088	0.180894	0.331584	0.300226	0.20105	0.182009	0.252694	0.363197	0.393174
		0.053333	0.26932	0.316167	0.180204	0.327778	0.300866	0.201569	0.183643	0.253194	0.358461	0.392191
		0.056667	0.271229	0.31314	0.182874	0.32586	0.30065	0.203906	0.183506	0.252277	0.355968	0.391249
		0.06	0.269122	0.312557	0.182226	0.327691	0.299495	0.203774	0.183708	0.251969	0.353165	0.392462
		0.063333	0.268623	0.310547	0.179297	0.326859	0.300092	0.204148	0.183666	0.251135	0.351542	0.393891
		0.066667	0.268328	0.309286	0.182771	0.326731	0.299396	0.201677	0.1837	0.252626	0.349502	0.395487
		0.07	0.268112	0.307842	0.184588	0.332103	0.297455	0.199606	0.182512	0.253535	0.34777	0.396373
		0.073333	0.265626	0.307636	0.18517	0.331142	0.297556	0.199966	0.184015	0.25252	0.345052	0.393696
		0.076667	0.267492	0.307745	0.187364	0.332287	0.296493	0.202687	0.18378	0.25279	0.343662	0.39381
		0.08	0.267263	0.307667	0.18918	0.333783	0.295993	0.203499	0.184609	0.254698	0.339806	0.394157
		0.083333	0.267378	0.30848	0.186902	0.329675	0.294326	0.204995	0.184589	0.254903	0.3377	0.392797
		0.086667	0.266998	0.305592	0.18746	0.326851	0.294024	0.204358	0.186048	0.254934	0.335956	0.389454
		0.09	0.268017	0.302931	0.187309	0.330732	0.294276	0.202378	0.186548	0.25561	0.334487	0.392129
		0.093333	0.267788	0.300076	0.184977	0.331861	0.29336	0.201206	0.188328	0.256284	0.332728	0.391665
		0.096667	0.267134	0.301158	0.183739	0.329446	0.291994	0.203141	0.189463	0.255607	0.331699	0.390699
		0.1	0.266829	0.29871	0.183653	0.332043	0.294951	0.205315	0.190446	0.256107	0.332009	0.390816
		0.103333	0.267818	0.300227	0.182723	0.331586	0.294989	0.202047	0.190848	0.25551	0.329525	0.391141
		0.106667	0.26957	0.2993	0.18398	0.332474	0.295936	0.20356	0.191919	0.255406	0.328089	0.390725
		0.11	0.268272	0.302014	0.186081	0.330117	0.297215	0.202163	0.190421	0.255727	0.327424	0.389452
		0.113333	0.268578	0.301028	0.187776	0.32977	0.296794	0.200696	0.19161	0.255493	0.327732	0.389007
		0.116667	0.269223	0.303218	0.18909	0.32996	0.297291	0.198023	0.191303	0.254702	0.324434	0.389438
		0.12	0.270244	0.301637	0.188403	0.329476	0.295782	0.204816	0.193328	0.255865	0.325044	0.390533
		0.123333	0.269311	0.304333	0.186792	0.32568	0.293798	0.203156	0.1937	0.256163	0.323974	0.390049
		0.126667	0.268613	0.301629	0.185151	0.324238	0.29417	0.202249	0.195416	0.255753	0.321125	0.391264
		0.13	0.268109	0.301941	0.18474	0.325674	0.295649	0.203765	0.19531	0.254908	0.31885	0.390413
		0.133333	0.269395	0.301709	0.181703	0.323647	0.292659	0.203529	0.196945	0.256045	0.318158	0.389643
		0.136667	0.26723	0.305194	0.182111	0.319958	0.296363	0.202902	0.195593	0.255455	0.317762	0.389549
		0.14	0.266477	0.307454	0.184587	0.325422	0.295905	0.201341	0.196475	0.254694	0.317742	0.389418
		0.143333	0.267565	0.309649	0.186188	0.329378	0.293649	0.205688	0.196225	0.254889	0.318424	0.388769
		0.146667	0.267126	0.309593	0.187008	0.32829	0.294127	0.200895	0.196925	0.256406	0.318505	0.390472
		0.15	0.266181	0.309171	0.190573	0.328132	0.295389	0.199525	0.196491	0.256178	0.319477	0.389288
		0.153333	0.2674	0.308301	0.19238	0.331535	0.293406	0.199666	0.196599	0.257535	0.316579	0.390041
		0.156667	0.266886	0.307987	0.191635	0.327075	0.294746	0.204104	0.19661	0.260098	0.317621	0.389998
		0.16	0.267335	0.308251	0.193199	0.325596	0.29721	0.199822	0.196735	0.26032	0.318331	0.388935
		0.163333	0.267698	0.309386	0.194446	0.325581	0.296592	0.201062	0.196742	0.260414	0.318053	0.386373
		0.166667	0.268135	0.313377	0.195035	0.325798	0.293645	0.201206	0.197383	0.261017	0.317414	0.386466
		0.17	0.267745	0.315313	0.195832	0.325866	0.291953	0.201704	0.19785	0.261132	0.319659	0.384475
		0.173333	0.269318	0.315541	0.196674	0.325435	0.292037	0.200184	0.198218	0.260829	0.317346	0.383588
		0.176667	0.269614	0.316767	0.196167	0.322911	0.28897	0.201471	0.198568	0.261316	0.315572	0.383247
		0.18	0.269073	0.315354	0.195956	0.324042	0.288191	0.201685	0.199489	0.260153	0.315756	0.382464
		0.183333	0.268847	0.312553	0.195598	0.325221	0.289302	0.202267	0.200722	0.260265	0.31489	0.384241
		0.186667	0.26829	0.312356	0.194512	0.322871	0.289277	0.200848	0.199509	0.259301	0.312918	0.384132
		0.19	0.267916	0.311254	0.195607	0.324272	0.287609	0.201082	0.198655	0.258529	0.31374	0.386661
		0.193333	0.267399	0.311495	0.193559	0.32437	0.288381	0.198636	0.19996	0.258889	0.313725	0.388273
		0.196667	0.267934	0.310574	0.191936	0.323657	0.288194	0.199814	0.19784	0.260469	0.31281	0.389136
		0.2	0.266551	0.309065	0.191659	0.323952	0.290048	0.203536	0.197317	0.261484	0.313698	0.38934
		0.203333	0.2666	0.308349	0.191792	0.323665	0.288944	0.205321	0.19762	0.260863	0.3139	0.389703
		0.206667	0.265584	0.307056	0.18793	0.321563	0.290032	0.204959	0.198795	0.261625	0.312457	0.387242
		0.21	0.265613	0.305286	0.188299	0.323062	0.291257	0.20608	0.19828	0.26132	0.312453	0.385407
		0.213333	0.266211	0.306435	0.189677	0.32593	0.290761	0.208462	0.200381	0.261634	0.312427	0.384745
		0.216667	0.266946	0.307089	0.189295	0.327995	0.288289	0.207229	0.199953	0.260663	0.310116	0.384141
		0.22	0.266046	0.30794	0.188957	0.326936	0.29351	0.205281	0.202268	0.260473	0.308661	0.383735
		0.223333	0.265544	0.308924	0.188564	0.329141	0.292473	0.204552	0.202309	0.260744	0.309997	0.383088
		0.226667	0.264106	0.313461	0.190063	0.325506	0.293152	0.205281	0.20378	0.261198	0.308172	0.382261
		0.23	0.263386	0.312624	0.191232	0.32171	0.293424	0.200783	0.202788	0.262275	0.306676	0.382324
		0.233333	0.261775	0.315115	0.192212	0.319819	0.295471	0.199347	0.203763	0.262146	0.307597	0.382027
		0.236667	0.262373	0.313276	0.192519	0.321187	0.29163	0.200277	0.203538	0.264722	0.307406	0.384352
		0.24	0.261102	0.31403	0.193826	0.318524	0.293395	0.200848	0.204285	0.265466	0.305311	0.384162
		0.243333	0.260417	0.309948	0.192717	0.320358	0.292768	0.199623	0.202305	0.2641	0.305383	0.387889
		0.246667	0.260507	0.311395	0.192129	0.320375	0.294168	0.201251	0.204902	0.264697	0.30628	0.38824
		0.25	0.261631	0.310678	0.194267	0.319037	0.294104	0.202309	0.204912	0.264879	0.305305	0.388086
		0.253333	0.261823	0.309932	0.195075	0.322845	0.297255	0.200899	0.205004	0.263707	0.30558	0.38685
		0.256667	0.263139	0.309205	0.197273	0.324668	0.297358	0.199148	0.203618	0.262897	0.304988	0.389899
		0.26	0.262493	0.310608	0.196744	0.319687	0.299949	0.199729	0.20547	0.265416	0.305649	0.386583
		0.263333	0.262077	0.309919	0.197681	0.317179	0.301151	0.201001	0.203925	0.264166	0.304845	0.389602
		0.266667	0.262774	0.310412	0.195332	0.320056	0.300546	0.201845	0.203918	0.264377	0.305431	0.392195
		0.27	0.261141	0.311756	0.19519	0.320089	0.299559	0.20168	0.203634	0.264271	0.305844	0.394801
		0.273333	0.262899	0.312368	0.194171	0.316707	0.302669	0.204835	0.205286	0.26543	0.306405	0.394983
		0.276667	0.262775	0.312057	0.197613	0.323978	0.303806	0.205983	0.203479	0.264418	0.305582	0.39754
		0.28	0.262527	0.312137	0.195544	0.324395	0.304829	0.204649	0.203511	0.265013	0.304679	0.395273
		0.283333	0.262088	0.312624	0.196226	0.324212	0.310512	0.203418	0.203575	0.264268	0.302888	0.391274
		0.286667	0.26462	0.311496	0.197168	0.321762	0.310948	0.20274	0.20368	0.264822	0.302427	0.389024
		0.29	0.263409	0.311637	0.19742	0.323129	0.310904	0.202339	0.203108	0.265865	0.302733	0.387381
		0.293333	0.26447	0.310368	0.1962	0.320402	0.306739	0.200122	0.204803	0.265978	0.302056	0.387437
		0.296667	0.263389	0.310955	0.198132	0.321341	0.306847	0.200953	0.203694	0.265427	0.302386	0.38936
		0.3	0.261384	0.308243	0.199621	0.322646	0.305813	0.20282	0.203193	0.266198	0.303833	0.390399
		0.303333	0.259205	0.30859	0.201032	0.319124	0.311999	0.204118	0.203097	0.26604	0.304087	0.39278
		0.306667	0.260014	0.30754	0.202274	0.318817	0.309317	0.201856	0.203707	0.264231	0.30399	0.392601
		0.31	0.260827	0.308907	0.203703	0.324209	0.314462	0.202542	0.203435	0.263704	0.304442	0.392614
		0.313333	0.262283	0.307578	0.204181	0.326099	0.313835	0.201138	0.204876	0.26487	0.30386	0.393319
		0.316667	0.262761	0.310022	0.203893	0.321026	0.311429	0.198094	0.205099	0.264397	0.303283	0.392765
		0.32	0.263168	0.309794	0.201168	0.326247	0.306744	0.1979	0.204439	0.264468	0.303107	0.390802
		0.323333	0.261692	0.309375	0.199343	0.326029	0.309225	0.199337	0.204216	0.265344	0.302298	0.392258
		0.326667	0.26157	0.31086	0.197496	0.319372	0.308428	0.199017	0.203885	0.265107	0.30334	0.391771
		0.33	0.260043	0.31303	0.195846	0.317935	0.310261	0.201374	0.202016	0.265103	0.304021	0.393164
		0.333333	0.263246	0.312971	0.195345	0.316035	0.310191	0.203115	0.202055	0.266929	0.303653	0.395568
		0.336667	0.264222	0.311323	0.196636	0.316901	0.311667	0.206111	0.201647	0.266252	0.302838	0.391568
		0.34	0.264091	0.31274	0.197811	0.318298	0.311241	0.207418	0.201778	0.265953	0.303753	0.388931
		0.343333	0.263635	0.311303	0.197835	0.31479	0.309974	0.208749	0.202472	0.267709	0.302618	0.386903
		0.346667	0.264695	0.307399	0.197898	0.311874	0.307491	0.206488	0.203874	0.266813	0.300887	0.386875
		0.35	0.263082	0.305344	0.197855	0.317745	0.307602	0.205913	0.203333	0.265305	0.301498	0.384396
		0.353333	0.262063	0.30992	0.197491	0.314714	0.306021	0.204296	0.20451	0.267238	0.301628	0.387909
		0.356667	0.263488	0.311248	0.198454	0.313971	0.305322	0.204097	0.203846	0.265693	0.300538	0.389443
		0.36	0.263379	0.310414	0.200694	0.317658	0.302278	0.2049	0.202152	0.264314	0.300875	0.391833
		0.363333	0.264597	0.312904	0.200952	0.318885	0.304503	0.208422	0.20287	0.265014	0.302379	0.39155
		0.366667	0.263893	0.313271	0.200827	0.315742	0.307398	0.209937	0.203057	0.265826	0.301924	0.392321
		0.37	0.263438	0.310299	0.201671	0.315336	0.305559	0.208832	0.202724	0.264828	0.302642	0.393587
		0.373333	0.263209	0.30949	0.199195	0.314674	0.30674	0.209027	0.203083	0.26881	0.303756	0.393757
		0.376667	0.262941	0.308014	0.196923	0.315297	0.309544	0.211146	0.204453	0.268598	0.303295	0.395376
		0.38	0.261187	0.307268	0.198139	0.316535	0.311687	0.209863	0.202733	0.268254	0.305158	0.394643
		0.383333	0.26002	0.307102	0.19839	0.314191	0.308458	0.209151	0.20422	0.268361	0.30473	0.395315
		0.386667	0.259379	0.30741	0.199128	0.316419	0.310728	0.209693	0.20439	0.268089	0.302674	0.393035
		0.39	0.257376	0.30569	0.20152	0.318202	0.309129	0.208488	0.204647	0.266482	0.302067	0.390616
		0.393333	0.259346	0.305514	0.202762	0.315012	0.308627	0.205239	0.204058	0.268412	0.303454	0.388475
		0.396667	0.260632	0.306661	0.203119	0.310608	0.304398	0.203861	0.204544	0.26784	0.300455	0.387971
		0.4	0.261216	0.305225	0.204908	0.314116	0.303877	0.202022	0.203161	0.266702	0.30134	0.387634
		0.403333	0.262847	0.30709	0.204591	0.312875	0.304701	0.200404	0.202608	0.268473	0.302186	0.388409
		0.406667	0.263852	0.308664	0.20425	0.310339	0.30453	0.201411	0.201965	0.267579	0.301423	0.389263
		0.41	0.262422	0.310911	0.203963	0.314529	0.303829	0.204742	0.20142	0.266306	0.301028	0.389779
		0.413333	0.261842	0.311083	0.202914	0.316571	0.30828	0.206726	0.200869	0.267251	0.301498	0.38855
		0.416667	0.262924	0.311918	0.201171	0.313773	0.307206	0.208075	0.201374	0.267795	0.301298	0.386811
		0.42	0.264318	0.310047	0.200237	0.310402	0.30758	0.211009	0.202348	0.267483	0.30151	0.386328
		0.423333	0.26464	0.310317	0.199344	0.311583	0.308517	0.209924	0.201757	0.268442	0.302428	0.387639
		0.426667	0.264436	0.307631	0.199244	0.308653	0.311787	0.207299	0.201558	0.26815	0.30081	0.387446
		0.43	0.264502	0.307263	0.197621	0.309572	0.308468	0.204521	0.202302	0.267594	0.300947	0.386014
		0.433333	0.264716	0.306752	0.197977	0.307081	0.309058	0.206627	0.201274	0.267508	0.301847	0.389237
		0.436667	0.264636	0.307488	0.198278	0.306402	0.308688	0.205372	0.200202	0.2671	0.30215	0.387625
		0.44	0.264814	0.307141	0.198057	0.305944	0.310375	0.206201	0.20076	0.265342	0.299713	0.388717
		0.443333	0.26574	0.306974	0.197845	0.310918	0.307442	0.203734	0.200993	0.267482	0.300957	0.3885
		0.446667	0.266705	0.308909	0.19981	0.309617	0.305794	0.206026	0.200014	0.268107	0.301976	0.388921
		0.45	0.265722	0.310969	0.200555	0.312035	0.30592	0.206633	0.200435	0.270494	0.300113	0.383949
		0.453333	0.266367	0.308453	0.199938	0.314847	0.30347	0.206907	0.201539	0.271281	0.29991	0.3856
		0.456667	0.268327	0.306796	0.200181	0.313092	0.301632	0.206473	0.200707	0.272722	0.302224	0.386041
		0.46	0.267696	0.310368	0.201637	0.308854	0.301351	0.207295	0.200084	0.273008	0.302156	0.386495
		0.463333	0.265561	0.305783	0.203117	0.309684	0.302735	0.207217	0.200404	0.27328	0.30199	0.387037
		0.466667	0.264107	0.308218	0.202418	0.309723	0.307265	0.204933	0.19949	0.273598	0.304098	0.39007
		0.47	0.260488	0.306181	0.203509	0.310743	0.305674	0.20445	0.199142	0.272935	0.304703	0.392697
		0.473333	0.261262	0.307193	0.204283	0.311571	0.308214	0.202851	0.198502	0.273186	0.303565	0.390737
		0.476667	0.261522	0.30575	0.203141	0.311137	0.306159	0.204106	0.199219	0.272287	0.303427	0.391394
		0.48	0.264152	0.30697	0.201923	0.310192	0.303488	0.20353	0.198716	0.273106	0.303319	0.392423
		0.483333	0.265401	0.304081	0.202494	0.313319	0.303173	0.204618	0.198223	0.27175	0.302608	0.393887
		0.486667	0.264727	0.30692	0.202735	0.309253	0.305397	0.2051	0.196694	0.271659	0.303566	0.394
		0.49	0.263017	0.306902	0.203565	0.306574	0.299354	0.20816	0.197075	0.27186	0.304133	0.392496
		0.493333	0.261892	0.307349	0.204267	0.307907	0.301578	0.211366	0.197464	0.271304	0.304243	0.390961
		0.496667	0.259512	0.309173	0.205364	0.312797	0.306966	0.213695	0.197868	0.270337	0.304428	0.391153
		0.5	0.023659	0.045944	0.044429	0.036376	0.038915	0.037091	0.02096	0.029703	0	0.015522
		0.503333	0	0.026838	0.002443	0.009244	9e-05	0.013266	0.002351	0.005961	0.013927	0
		0.506667	0.000748	0	0	0.002145	0	0.008425	0	0	0.029682	0.003197
		0.51	0.004636	0.014012	0.014128	0	0.012638	0.002497	0.007068	0.012279	0.040793	0.003294
		0.513333	0.009361	0.011355	0.019557	0.00151	0.020541	0.005748	0.014447	0.030611	0.057692	0.00815
		0.516667	0.011839	0.013188	0.018626	0.000456	0.018532	0	0.01564	0.031936	0.070427	0.010088
		0.52	0.020077	0.02561	0.032685	0.00903	0.031583	0.005394	0.024555	0.046762	0.087212	0.01862
		0.523333	0.03183	0.044553	0.046886	0.018432	0.042783	0.012582	0.034492	0.066495	0.104027	0.028391
		0.526667	0.043763	0.061022	0.058783	0.027416	0.052363	0.021443	0.043089	0.083733	0.121882	0.042885
		0.53	0.058009	0.081103	0.073041	0.03853	0.061378	0.026917	0.053248	0.097434	0.139958	0.054997
		0.533333	0.068111	0.095633	0.0864712	0.047375	0.07212	0.036969	0.0643498	0.112794	0.159904	0.067283
		0.536667	0.083091	0.107	0.0995007	0.056867	0.081718	0.044802	0.0759015	0.132186	0.178633	0.079676
		0.54	0.095194	0.120773	0.111467	0.067984	0.091128	0.055185	0.0867634	0.145035	0.198407	0.092641
		0.543333	0.108654	0.134343	0.124769	0.080052	0.101715	0.06363	0.099892	0.161586	0.218546	0.103647
		0.546667	0.119359	0.147847	0.137307	0.090249	0.114207	0.07426	0.110387	0.180331	0.237678	0.116644
		0.55	0.133241	0.163499	0.150974	0.100398	0.125105	0.084949	0.122382	0.199502	0.258179	0.128855
		0.553333	0.1476	0.180589	0.165318	0.110281	0.136811	0.098983	0.132366	0.21589	0.275294	0.142596
		0.556667	0.15926	0.193602	0.178999	0.121191	0.147451	0.10744	0.144322	0.232586	0.294426	0.153779
		0.56	0.170596	0.207583	0.189966	0.132137	0.158865	0.117298	0.154884	0.245905	0.311367	0.166367
		0.563333	0.184674	0.220428	0.202005	0.140942	0.168127	0.131158	0.166801	0.260329	0.329054	0.178306
		0.566667	0.196978	0.235422	0.213064	0.151083	0.178355	0.140798	0.179196	0.273526	0.344056	0.189685
		0.57	0.209507	0.258381	0.226381	0.162279	0.19032	0.151933	0.192294	0.287467	0.359665	0.200823
		0.573333	0.219283	0.276252	0.239238	0.170091	0.201098	0.160682	0.203103	0.304217	0.376663	0.213191
		0.576667	0.23042	0.290662	0.254764	0.178331	0.210842	0.173029	0.21468	0.321073	0.392836	0.224271
		0.58	0.240302	0.307529	0.266374	0.189447	0.223644	0.183702	0.225604	0.336039	0.408146	0.23477
		0.583333	0.25058	0.320907	0.28079	0.19756	0.232628	0.194444	0.235868	0.351931	0.424405	0.246712
		0.586667	0.262455	0.332668	0.294055	0.206088	0.241841	0.202671	0.248404	0.36988	0.439747	0.258636
		0.59	0.276346	0.343902	0.305064	0.218446	0.253641	0.214846	0.259616	0.384551	0.454007	0.270477
		0.593333	0.286595	0.359447	0.314965	0.228246	0.263423	0.225288	0.269957	0.401102	0.468451	0.28077
		0.596667	0.298971	0.370793	0.32538	0.238565	0.270688	0.232951	0.281095	0.414812	0.483757	0.291021
		0.6	0.311045	0.382793	0.334338	0.248053	0.281959	0.242449	0.293121	0.428209	0.497564	0.300895
		0.603333	0.321336	0.393852	0.346049	0.257543	0.289269	0.255078	0.303004	0.439199	0.511518	0.310116
		0.606667	0.329766	0.404456	0.35667	0.26541	0.298003	0.26528	0.312217	0.451657	0.524122	0.319971
		0.61	0.340569	0.416891	0.366626	0.276139	0.30741	0.274503	0.322526	0.46284	0.536131	0.330035
		0.613333	0.348584	0.430003	0.377856	0.286515	0.317495	0.287781	0.333203	0.473959	0.550554	0.339531
		0.616667	0.357675	0.441925	0.389925	0.2967	0.326505	0.296038	0.343038	0.487456	0.563127	0.347781
		0.62	0.369925	0.457917	0.400194	0.306235	0.335655	0.307153	0.352422	0.497503	0.575049	0.356115
		0.623333	0.381918	0.47393	0.410416	0.315464	0.343953	0.318615	0.362814	0.507161	0.587016	0.364328
		0.626667	0.393168	0.484567	0.419717	0.32373	0.350664	0.32928	0.372759	0.519464	0.599225	0.375932
		0.63	0.403573	0.491068	0.428271	0.330168	0.3591	0.336547	0.381547	0.535505	0.60932	0.384675
		0.633333	0.413478	0.505234	0.435712	0.339949	0.366842	0.34936	0.390607	0.548121	0.619682	0.39336
		0.636667	0.424715	0.514029	0.445119	0.349087	0.37466	0.357786	0.398581	0.56257	0.631036	0.403029
		0.64	0.433382	0.523355	0.454112	0.357975	0.38106	0.367263	0.406431	0.578044	0.640965	0.41142
		0.643333	0.442315	0.534059	0.464648	0.365692	0.389269	0.374487	0.41261	0.586983	0.652194	0.416327
		0.646667	0.451245	0.545503	0.47462	0.374556	0.397941	0.382431	0.420747	0.595708	0.661647	0.425047
		0.65	0.45935	0.555596	0.484902	0.384192	0.405937	0.389968	0.42903	0.601604	0.673973	0.433529
		0.653333	0.467775	0.567653	0.491376	0.392435	0.414425	0.398365	0.439993	0.609128	0.683691	0.441742
		0.656667	0.475379	0.5714	0.498548	0.401987	0.423261	0.402945	0.448893	0.616811	0.694597	0.449697
		0.66	0.482435	0.578097	0.504352	0.410285	0.431176	0.410018	0.458252	0.627306	0.704782	0.458998
		0.663333	0.490842	0.591402	0.511235	0.419412	0.439956	0.419763	0.464459	0.636925	0.712942	0.467503
		0.666667	0.499298	0.597853	0.519544	0.424717	0.446423	0.429496	0.471752	0.647904	0.722161	0.475061
		0.67	0.505851	0.602914	0.528943	0.43043	0.454126	0.439132	0.479395	0.654893	0.729923	0.48134
		0.673333	0.514232	0.615397	0.537636	0.437834	0.461136	0.446259	0.486316	0.663995	0.736984	0.488701
		0.676667	0.521704	0.625559	0.5464	0.445408	0.467853	0.455694	0.494182	0.67231	0.74347	0.493751
		0.68	0.527567	0.631622	0.554663	0.450972	0.472992	0.46254	0.502442	0.68039	0.751491	0.498721
		0.683333	0.533669	0.639465	0.561772	0.460383	0.481256	0.468634	0.509905	0.686799	0.759994	0.504489
		0.686667	0.543416	0.652056	0.56984	0.468565	0.488717	0.476336	0.516756	0.698256	0.768656	0.512019
		0.69	0.549451	0.660419	0.576715	0.475056	0.496562	0.484737	0.525099	0.705774	0.777471	0.517239
		0.693333	0.55536	0.668572	0.583635	0.4835	0.504466	0.492531	0.531012	0.711988	0.785084	0.524415
		0.696667	0.562701	0.676494	0.590458	0.49258	0.510839	0.497883	0.53715	0.71783	0.795134	0.53051
		0.7	0.569911	0.68572	0.595684	0.498592	0.516802	0.506202	0.5439	0.726558	0.801979	0.537433
		0.703333	0.574863	0.690129	0.603078	0.505528	0.521683	0.514905	0.550402	0.733633	0.808296	0.544321
		0.706667	0.581332	0.693142	0.609487	0.510903	0.5287	0.522291	0.555348	0.741221	0.81515	0.550231
		0.71	0.588625	0.698823	0.615999	0.517508	0.534873	0.529363	0.561236	0.750547	0.822614	0.557089
		0.713333	0.594141	0.710642	0.623619	0.521635	0.540484	0.537292	0.568354	0.760567	0.826888	0.56229
		0.716667	0.601235	0.715619	0.630612	0.528043	0.544687	0.54311	0.575482	0.765911	0.833034	0.566662
		0.72	0.607254	0.723943	0.637235	0.535055	0.551129	0.548131	0.582856	0.773397	0.839993	0.571357
		0.723333	0.614755	0.733846	0.642745	0.542486	0.556119	0.55402	0.588874	0.780596	0.846507	0.577506
		0.726667	0.621007	0.741119	0.64827	0.548767	0.561783	0.558219	0.595912	0.785013	0.853168	0.581666
		0.73	0.628639	0.741983	0.653424	0.556661	0.567214	0.56434	0.601191	0.788864	0.859782	0.587612
		0.733333	0.633095	0.747786	0.660357	0.562927	0.574465	0.569043	0.605792	0.796718	0.866113	0.593794
		0.736667	0.641483	0.753939	0.66739	0.567193	0.579289	0.576127	0.61169	0.802976	0.874264	0.59803
		0.74	0.645828	0.760631	0.673379	0.575373	0.583865	0.583541	0.618098	0.807221	0.879415	0.604244
		0.743333	0.650065	0.765945	0.68051	0.581012	0.588575	0.59134	0.623328	0.816434	0.884637	0.608863
		0.746667	0.653734	0.772145	0.684012	0.585242	0.593366	0.596648	0.62965	0.828502	0.890711	0.613831
		0.75	0.659781	0.780133	0.688073	0.590953	0.599261	0.604031	0.6344	0.833701	0.895859	0.619251
		0.753333	0.6641	0.785104	0.693498	0.596216	0.604406	0.609335	0.640475	0.837226	0.899068	0.624681
		0.756667	0.671582	0.793068	0.698017	0.600165	0.609834	0.610913	0.646036	0.843534	0.904193	0.62871
		0.76	0.678211	0.799329	0.70245	0.604449	0.613651	0.614457	0.651022	0.847838	0.909361	0.634709
		0.763333	0.684564	0.803526	0.709226	0.612671	0.620635	0.618447	0.655892	0.84635	0.914781	0.638582
		0.766667	0.689408	0.808517	0.715791	0.618968	0.624775	0.622494	0.661675	0.851261	0.919711	0.643448
		0.77	0.695988	0.814795	0.719695	0.623748	0.629027	0.626706	0.6673	0.85683	0.924668	0.647141
		0.773333	0.697441	0.820051	0.725633	0.630303	0.634415	0.634403	0.670951	0.862683	0.93028	0.651286
		0.776667	0.702549	0.823631	0.72908	0.636361	0.641653	0.638414	0.675893	0.869509	0.935612	0.654326
		0.78	0.706213	0.831431	0.732787	0.637696	0.645106	0.643469	0.681016	0.878247	0.940142	0.660026
		0.783333	0.71058	0.8332	0.73662	0.642966	0.648809	0.646343	0.686866	0.884755	0.945591	0.664856
		0.786667	0.714836	0.83867	0.742779	0.648569	0.654432	0.651904	0.691903	0.890706	0.949998	0.66985
		0.79	0.719933	0.841655	0.7466	0.652672	0.657457	0.655281	0.696446	0.896065	0.954955	0.674856
		0.793333	0.723219	0.845234	0.753237	0.657561	0.65943	0.660468	0.700826	0.899711	0.958248	0.679214
		0.796667	0.728367	0.846811	0.758509	0.664968	0.664142	0.664668	0.704317	0.905197	0.964816	0.682813
		0.8	0.732234	0.856482	0.762677	0.669956	0.668977	0.671867	0.707674	0.911873	0.967624	0.685274
		0.803333	0.735765	0.859972	0.76601	0.676535	0.673152	0.678366	0.711174	0.919122	0.972592	0.688958
		0.806667	0.742023	0.861834	0.770323	0.680646	0.676429	0.684358	0.715646	0.923133	0.975275	0.691614
		0.81	0.74743	0.869577	0.773635	0.685591	0.68059	0.690712	0.720499	0.927802	0.980103	0.694524
		0.813333	0.752423	0.876806	0.778058	0.691488	0.6842	0.69674	0.725593	0.929916	0.98323	0.697302
		0.816667	0.757524	0.880274	0.782703	0.694795	0.687117	0.699366	0.729988	0.933426	0.98789	0.70109
		0.82	0.763644	0.887501	0.788932	0.698966	0.689669	0.701679	0.733949	0.936497	0.992756	0.705124
		0.823333	0.766277	0.894275	0.794513	0.703314	0.695256	0.704728	0.737443	0.939833	0.997451	0.710286
		0.826667	0.769386	0.895916	0.798169	0.707199	0.700225	0.70639	0.740305	0.944021	1.00053	0.715593
		0.83	0.772646	0.900648	0.802513	0.711341	0.702422	0.707864	0.743945	0.947837	1.0034	0.719846
		0.833333	0.776403	0.901556	0.805463	0.716328	0.706724	0.715397	0.747275	0.952571	1.00649	0.723325
		0.836667	0.781097	0.905348	0.809624	0.721723	0.712088	0.722466	0.752963	0.956593	1.00944	0.727201
		0.84	0.785929	0.907055	0.812057	0.725129	0.714727	0.727766	0.757737	0.962705	1.01408	0.729026
		0.843333	0.789679	0.910534	0.815136	0.730239	0.718086	0.73432	0.762337	0.968263	1.0176	0.732987
		0.846667	0.793844	0.91337	0.817015	0.733496	0.722495	0.74275	0.766546	0.976119	1.02085	0.735028
		0.85	0.797934	0.917406	0.821827	0.737445	0.726219	0.744723	0.771976	0.979467	1.02394	0.738039
		0.853333	0.800547	0.922282	0.823714	0.740995	0.728807	0.745858	0.775958	0.983204	1.0294	0.741205
		0.856667	0.803357	0.931317	0.826539	0.745101	0.733124	0.748553	0.777722	0.985598	1.03216	0.743995
		0.86	0.807582	0.936679	0.829411	0.748442	0.735362	0.747446	0.780843	0.988942	1.0362	0.746948
		0.863333	0.809432	0.938133	0.833566	0.754273	0.738705	0.746063	0.782965	0.988473	1.04147	0.751729
		0.866667	0.812669	0.941575	0.836924	0.757597	0.742428	0.751202	0.786387	0.994866	1.04616	0.754438
		0.87	0.817271	0.945959	0.843557	0.762418	0.746307	0.756687	0.789085	0.99731	1.04784	0.758294
		0.873333	0.82109	0.947373	0.848112	0.768354	0.749876	0.760849	0.794212	1.00099	1.0514	0.761348
		0.876667	0.82364	0.947964	0.852642	0.773798	0.753669	0.769361	0.798432	1.0044	1.05412	0.764708
		0.88	0.82791	0.952712	0.857256	0.77683	0.756567	0.776799	0.801677	1.00899	1.05666	0.76646
		0.883333	0.832403	0.957127	0.860997	0.781643	0.75977	0.777785	0.80361	1.01061	1.05923	0.769721
		0.886667	0.834902	0.956807	0.864144	0.784662	0.764056	0.783916	0.806723	1.0169	1.06332	0.771356
		0.89	0.837532	0.959433	0.86717	0.789233	0.766559	0.786042	0.810674	1.0204	1.06556	0.774949
		0.893333	0.842497	0.966422	0.870133	0.792401	0.77157	0.789808	0.812994	1.0226	1.07087	0.77633
		0.896667	0.846531	0.969839	0.874019	0.797179	0.776254	0.793704	0.817057	1.02464	1.07332	0.77959
		0.9	0.84995	0.973324	0.875105	0.80076	0.779377	0.797382	0.820194	1.02656	1.07625	0.783252
		0.903333	0.852387	0.981646	0.876145	0.805135	0.780911	0.798232	0.823809	1.02664	1.07775	0.785737
		0.906667	0.85563	0.986378	0.878871	0.808335	0.784038	0.804684	0.825942	1.03017	1.0801	0.788556
		0.91	0.857019	0.987967	0.882327	0.811018	0.78641	0.804113	0.827916	1.03219	1.08217	0.792043
		0.913333	0.859441	0.9905	0.885268	0.812805	0.788682	0.808404	0.829576	1.03482	1.08566	0.794979
		0.916667	0.862832	0.992801	0.890709	0.816033	0.790974	0.814181	0.832911	1.03448	1.0895	0.797752
		0.92	0.867538	0.994565	0.89515	0.81974	0.795387	0.81595	0.83672	1.03835	1.09288	0.800784
		0.923333	0.871431	0.993128	0.899524	0.823766	0.799228	0.814218	0.840569	1.03826	1.0977	0.803291
		0.926667	0.875071	0.993536	0.903756	0.828414	0.802588	0.8217	0.843003	1.04107	1.10041	0.806132
		0.93	0.878487	0.996626	0.905949	0.831312	0.80669	0.822916	0.847517	1.04371	1.10411	0.808829
		0.933333	0.881022	0.999258	0.906222	0.836709	0.810661	0.822547	0.849126	1.04974	1.10782	0.810738
		0.936667	0.883583	1.0044	0.909348	0.839362	0.812864	0.829129	0.852469	1.05489	1.11051	0.814353
		0.94	0.884237	1.01346	0.910898	0.841305	0.815032	0.835489	0.854329	1.06081	1.11315	0.81524
		0.943333	0.886659	1.01928	0.910604	0.845167	0.818725	0.836473	0.859198	1.06635	1.115	0.818772
		0.946667	0.88846	1.02396	0.911425	0.847822	0.820487	0.841215	0.861827	1.07058	1.11666	0.820514
		0.95	0.889715	1.02673	0.915823	0.848718	0.822145	0.842949	0.865756	1.07153	1.11893	0.823213
		0.953333	0.893924	1.02802	0.918647	0.851422	0.823864	0.846082	0.868373	1.07341	1.12126	0.825597
		0.956667	0.897015	1.02717	0.921547	0.85468	0.827538	0.850017	0.870538	1.07357	1.12339	0.829453
		0.96	0.900207	1.03057	0.92494	0.853821	0.829092	0.85324	0.8733	1.07446	1.12847	0.830196
		0.963333	0.902888	1.03359	0.929524	0.858759	0.832135	0.85356	0.874706	1.07776	1.1309	0.833952
		0.966667	0.905988	1.03732	0.932149	0.861301	0.836479	0.862392	0.877243	1.08316	1.13294	0.836062
		0.97	0.907744	1.0384	0.935323	0.864026	0.840316	0.866671	0.878388	1.08528	1.13595	0.837958
		0.973333	0.910921	1.04249	0.936662	0.866546	0.842731	0.870502	0.880315	1.08921	1.13746	0.840142
		0.976667	0.914226	1.04507	0.938939	0.871112	0.84526	0.874285	0.881903	1.09084	1.13641	0.842777
		0.98	0.917937	1.04624	0.939707	0.871458	0.84777	0.877294	0.884705	1.09501	1.13991	0.843032
		0.983333	0.920452	1.04892	0.942763	0.875557	0.848982	0.876959	0.887538	1.09876	1.14276	0.846133
		0.986667	0.925019	1.05166	0.944582	0.877894	0.851447	0.87992	0.890849	1.09891	1.14452	0.846914
		0.99	0.928298	1.05329	0.948978	0.881292	0.853734	0.882187	0.892851	1.10334	1.14722	0.849615
		0.993333	0.93007	1.05276	0.95162	0.884097	0.855225	0.883007	0.895146	1.10681	1.15121	0.851643
		0.996667	0.930787	1.05578	0.953807	0.888115	0.856895	0.888319	0.896655	1.1071	1.15276	0.854734
		1	0.9332	1.05701	0.95417	0.889927	0.859745	0.893232	0.898038	1.10752	1.15517	0.856031
		1.00333	0.934951	1.05986	0.956597	0.894315	0.86174	0.89587	0.900673	1.11235	1.1583	0.85924
		1.00667	0.937264	1.06169	0.95824	0.896273	0.862612	0.893387	0.905861	1.11448	1.1605	0.860334
		1.01	0.940453	1.06653	0.961741	0.899015	0.867132	0.896342	0.90798	1.11766	1.16364	0.863206
		1.01333	0.942909	1.06803	0.965485	0.902836	0.868184	0.897197	0.910966	1.1206	1.16495	0.864976
		1.01667	0.944657	1.06787	0.968028	0.905673	0.870008	0.896978	0.914123	1.12179	1.16704	0.867946
		1.02	0.946709	1.07277	0.971165	0.908041	0.870293	0.898181	0.916427	1.12212	1.16755	0.870139
		1.02333	0.950479	1.07441	0.97347	0.911267	0.872271	0.905248	0.916982	1.12439	1.17095	0.872012
		1.02667	0.951542	1.07442	0.975432	0.914458	0.87255	0.907666	0.918805	1.12505	1.17264	0.873373
		1.03	0.95701	1.07558	0.977827	0.916152	0.874156	0.911145	0.921093	1.12887	1.17553	0.875934
		1.03333	0.958819	1.08223	0.980556	0.92018	0.875115	0.916645	0.921262	1.13268	1.17679	0.877231
		1.03667	0.961233	1.08196	0.983312	0.921506	0.877814	0.919744	0.923781	1.13786	1.18036	0.879136
		1.04	0.962158	1.08429	0.985725	0.923323	0.881048	0.919051	0.925218	1.13987	1.18245	0.882501
		1.04333	0.963559	1.08735	0.989453	0.92621	0.882498	0.922775	0.927456	1.14333	1.18498	0.883949
		1.04667	0.963868	1.08978	0.990732	0.929405	0.885538	0.924506	0.928692	1.14352	1.18794	0.8866
		1.05	0.966366	1.09318	0.99342	0.931482	0.888633	0.926587	0.93155	1.14572	1.19144	0.888938
		1.05333	0.96835	1.09384	0.996084	0.934653	0.889681	0.928388	0.934126	1.14663	1.19177	0.890217
		1.05667	0.970892	1.09707	0.999626	0.937413	0.891683	0.934152	0.936902	1.14929	1.19303	0.890946
		1.06	0.973374	1.10352	1.00094	0.939355	0.895159	0.936555	0.939323	1.14889	1.19417	0.893241
		1.06333	0.974665	1.10904	1.00361	0.940681	0.898143	0.938738	0.942451	1.15084	1.19582	0.89519
		1.06667	0.978212	1.10728	1.00685	0.941801	0.900367	0.938773	0.943869	1.15011	1.1976	0.89604
		1.07	0.980802	1.1121	1.00769	0.944559	0.90444	0.940076	0.945334	1.15057	1.19981	0.898009
		1.07333	0.982147	1.1122	1.00713	0.947142	0.906234	0.942519	0.946257	1.15044	1.20121	0.898705
		1.07667	0.985505	1.11139	1.00843	0.950592	0.907655	0.944485	0.947462	1.15302	1.20239	0.900798
		1.08	0.986715	1.10893	1.01004	0.953692	0.908068	0.941866	0.949186	1.15589	1.20293	0.902212
		1.08333	0.986945	1.11411	1.01085	0.956861	0.909804	0.942774	0.953445	1.16129	1.20392	0.904104
		1.08667	0.989324	1.11654	1.01245	0.958792	0.911391	0.949842	0.956603	1.16393	1.20676	0.905884
		1.09	0.991522	1.12043	1.01485	0.961794	0.913169	0.950634	0.959449	1.16543	1.2099	0.908697
		1.09333	0.992872	1.12135	1.01628	0.964501	0.914419	0.952203	0.961946	1.16861	1.21252	0.910008
		1.09667	0.995157	1.12684	1.01897	0.967601	0.916472	0.957836	0.963024	1.16837	1.21631	0.91137
		1.1	0.996707	1.12782	1.02155	0.969581	0.918844	0.962784	0.963358	1.16885	1.2177	0.912981
		1.10333	0.99871	1.12858	1.02493	0.973095	0.920234	0.961004	0.964036	1.16791	1.21816	0.914377
		1.10667	1.0009	1.12812	1.02769	0.974178	0.922261	0.964377	0.967362	1.16999	1.22022	0.916254
		1.11	1.00223	1.12993	1.03011	0.973266	0.923648	0.965973	0.968693	1.17074	1.22138	0.917058
		1.11333	1.00514	1.13074	1.03303	0.97541	0.925428	0.965131	0.971609	1.17703	1.2231	0.918335
		1.11667	1.00657	1.12899	1.03408	0.977562	0.92727	0.965116	0.973045	1.17919	1.22519	0.920929
		1.12	1.00729	1.13191	1.03365	0.979426	0.930365	0.968263	0.974866	1.18299	1.22884	0.922956
		1.12333	1.00906	1.13493	1.03388	0.981966	0.931956	0.971606	0.974949	1.18523	1.22963	0.924638
		1.12667	1.01172	1.13721	1.03484	0.986179	0.933181	0.975548	0.978329	1.18788	1.23196	0.928491
		1.13	1.01371	1.13709	1.03564	0.987448	0.934611	0.982283	0.97948	1.18636	1.23316	0.930684
		1.13333	1.01663	1.13965	1.03613	0.987971	0.936455	0.985781	0.981822	1.18552	1.23501	0.929918
		1.13667	1.02072	1.14359	1.039	0.989386	0.938547	0.985839	0.985484	1.1872	1.23608	0.931225
		1.14	1.02142	1.14674	1.03982	0.990008	0.940232	0.985555	0.986716	1.1889	1.23697	0.931996
		1.14333	1.02238	1.14494	1.04301	0.989837	0.942187	0.988457	0.985892	1.18876	1.23871	0.932196
		1.14667	1.02405	1.14477	1.0449	0.990907	0.94501	0.989877	0.986859	1.19119	1.23981	0.933409
		1.15	1.02598	1.15079	1.04705	0.99365	0.947102	0.989348	0.988086	1.19266	1.24377	0.937249
		1.15333	1.02733	1.15028	1.04987	0.993823	0.947975	0.994524	0.987566	1.19441	1.24437	0.940722
		1.15667	1.03189	1.15058	1.05442	0.996839	0.949358	0.998608	0.989832	1.19754	1.24637	0.94275
		1.16	1.03354	1.15477	1.05633	1.00097	0.953073	0.998749	0.993587	1.2008	1.2477	0.944544
		1.16333	1.03656	1.15714	1.05744	1.00291	0.954732	1.00043	0.995803	1.20417	1.24957	0.945171
		1.16667	1.0393	1.15466	1.06068	1.00424	0.955553	1.00328	0.997872	1.20846	1.24818	0.945499
		1.17	1.04038	1.15449	1.06056	1.00845	0.956488	1.00521	1.0028	1.21111	1.24965	0.945541
		1.17333	1.04038	1.15578	1.06062	1.00889	0.958894	1.00377	1.00467	1.21056	1.25138	0.94648
		1.17667	1.04345	1.15667	1.06054	1.01057	0.96023	1.00526	1.00581	1.21129	1.25367	0.948019
		1.18	1.04281	1.1601	1.06184	1.01111	0.960779	1.00835	1.00673	1.21179	1.25312	0.94938
		1.18333	1.04356	1.16328	1.06341	1.01465	0.96254	1.00963	1.00837	1.21072	1.25641	0.951915
		1.18667	1.04406	1.1674	1.06617	1.01377	0.963491	1.01104	1.0074	1.21176	1.25907	0.952786
		1.19	1.0468	1.1706	1.0689	1.01659	0.964358	1.0133	1.00858	1.21528	1.25954	0.955169
		1.19333	1.04662	1.173	1.07078	1.01818	0.965596	1.01433	1.01083	1.21699	1.26022	0.956896
		1.19667	1.04871	1.17321	1.07237	1.02141	0.968095	1.0148	1.01337	1.21809	1.2633	0.959079
		1.2	1.05075	1.17648	1.07272	1.02225	0.969242	1.01635	1.01408	1.22298	1.26504	0.958067
		1.20333	1.05497	1.17541	1.07437	1.02546	0.971815	1.01562	1.01492	1.22447	1.26683	0.959664
		1.20667	1.05588	1.174	1.0745	1.02583	0.972826	1.02135	1.01545	1.22396	1.2695	0.959529
		1.21	1.05945	1.17535	1.07617	1.02695	0.974789	1.02486	1.0165	1.22596	1.27083	0.959317
		1.21333	1.06108	1.17628	1.0778	1.02868	0.975844	1.02684	1.01719	1.22786	1.2736	0.96028
		1.21667	1.0647	1.17529	1.07994	1.02936	0.976268	1.02855	1.01878	1.22809	1.27266	0.963647
		1.22	1.06583	1.1772	1.08244	1.03156	0.977827	1.03084	1.02037	1.22882	1.27324	0.964806
		1.22333	1.06729	1.17814	1.08462	1.03353	0.979513	1.02807	1.02323	1.23282	1.27378	0.966936
		1.22667	1.06902	1.18089	1.08539	1.03544	0.981955	1.02903	1.02304	1.23481	1.27486	0.969025
		1.23	1.07169	1.18336	1.08675	1.03849	0.982454	1.03036	1.02536	1.2354	1.27571	0.968862
		1.23333	1.07176	1.18511	1.08732	1.04202	0.983598	1.03298	1.02777	1.23845	1.27817	0.969581
		1.23667	1.07363	1.18674	1.08783	1.04146	0.983487	1.03825	1.03164	1.23982	1.28099	0.97209
		1.24	1.07576	1.19244	1.08829	1.04561	0.984897	1.04199	1.03381	1.238	1.28249	0.973211
		1.24333	1.0767	1.19694	1.09079	1.04713	0.985947	1.04324	1.0366	1.2377	1.28375	0.97428
		1.24667	1.07797	1.19935	1.09138	1.04682	0.988735	1.04361	1.03794	1.24013	1.28329	0.977567
		1.25	1.07907	1.19916	1.09257	1.04792	0.990958	1.0456	1.03835	1.23572	1.28397	0.980037
		1.25333	1.08015	1.20191	1.09472	1.05187	0.993521	1.04577	1.03742	1.23708	1.28355	0.979868
		1.25667	1.08115	1.20051	1.09574	1.05129	0.99596	1.04493	1.03724	1.23858	1.28474	0.980747
		1.26	1.08206	1.19971	1.09761	1.05377	0.995802	1.04622	1.03857	1.23963	1.28677	0.982524
		1.26333	1.08401	1.20095	1.10004	1.05502	0.99717	1.05139	1.03973	1.24038	1.28882	0.98395
		1.26667	1.0842	1.20543	1.10127	1.05622	0.999735	1.0539	1.04125	1.24385	1.29113	0.983871
		1.27	1.08755	1.20967	1.10138	1.05696	1.0014	1.05417	1.04413	1.24395	1.29258	0.98492
		1.27333	1.0901	1.21424	1.10331	1.05923	1.00148	1.05964	1.04638	1.24714	1.29436	0.985699
		1.27667	1.0911	1.21628	1.10473	1.06015	1.0029	1.05935	1.04726	1.25106	1.29523	0.987298
		1.28	1.08965	1.21736	1.10519	1.06327	1.00346	1.06005	1.04891	1.25465	1.29641	0.986804
		1.28333	1.09115	1.21777	1.10688	1.06529	1.00377	1.06129	1.05102	1.25625	1.29889	0.988665
		1.28667	1.09016	1.21542	1.10772	1.06719	1.00579	1.063	1.05002	1.26001	1.30053	0.989677
		1.29	1.09073	1.21578	1.10943	1.06849	1.00762	1.05786	1.0501	1.26347	1.30317	0.99299
		1.29333	1.09184	1.21473	1.10947	1.06993	1.00796	1.0614	1.05224	1.26576	1.30443	0.993075
		1.29667	1.0942	1.21649	1.11034	1.07083	1.01063	1.06235	1.05183	1.26482	1.30694	0.995385
		1.3	1.09681	1.21803	1.1114	1.07221	1.01246	1.06187	1.05246	1.26948	1.30702	0.996376
		1.30333	1.09901	1.2183	1.11355	1.07405	1.01267	1.06267	1.05582	1.27031	1.30856	0.998761
		1.30667	1.10023	1.21894	1.116	1.07631	1.01377	1.06823	1.05795	1.27026	1.30992	0.999245
		1.31	1.10209	1.22105	1.1167	1.07669	1.01577	1.06729	1.05804	1.27187	1.31149	0.999629
		1.31333	1.10417	1.22333	1.11808	1.07852	1.01656	1.06731	1.0615	1.27134	1.31148	1.00039
		1.31667	1.10498	1.22466	1.11959	1.08028	1.01706	1.06723	1.06353	1.27005	1.31204	1.00055
		1.32	1.10464	1.2292	1.12207	1.08068	1.01868	1.06837	1.06381	1.27161	1.31344	1.0012
		1.32333	1.10636	1.22989	1.12308	1.0814	1.01977	1.07136	1.06421	1.2725	1.31305	1.00259
		1.32667	1.10844	1.2305	1.12404	1.08439	1.02044	1.07391	1.06476	1.27058	1.31282	1.00392
		1.33	1.10985	1.23204	1.12606	1.08481	1.02201	1.07417	1.06534	1.27501	1.31441	1.00515
		1.33333	1.11211	1.23164	1.12751	1.08536	1.02413	1.07787	1.06637	1.27886	1.316	1.00542
		1.33667	1.11525	1.23113	1.12789	1.08789	1.02574	1.08069	1.06915	1.27942	1.3159	1.0056
		1.34	1.11513	1.23425	1.12801	1.08976	1.02878	1.08046	1.07099	1.28137	1.31638	1.00671
		1.34333	1.11561	1.23537	1.13022	1.0921	1.03125	1.07998	1.07262	1.2859	1.31884	1.01004
		1.34667	1.11692	1.23628	1.13122	1.09295	1.03132	1.08045	1.07404	1.28804	1.31953	1.01152
		1.35	1.11708	1.24044	1.13153	1.09477	1.03213	1.08141	1.07454	1.2886	1.32034	1.01414
		1.35333	1.11657	1.24197	1.13293	1.09461	1.03297	1.08237	1.07437	1.29038	1.32196	1.01437
		1.35667	1.11934	1.24255	1.13358	1.09692	1.03327	1.08594	1.07622	1.29156	1.32365	1.01659
		1.36	1.12048	1.24291	1.13526	1.09549	1.03351	1.08786	1.07927	1.29087	1.32542	1.01504
		1.36333	1.12116	1.24388	1.1357	1.09763	1.03497	1.092	1.07984	1.28954	1.3266	1.01444
		1.36667	1.12195	1.24405	1.13727	1.09863	1.0365	1.09395	1.08091	1.29101	1.32863	1.01557
		1.37	1.12521	1.24481	1.1377	1.10072	1.0374	1.0938	1.08318	1.29227	1.32846	1.01757
		1.37333	1.12609	1.24662	1.13969	1.10085	1.03822	1.09272	1.08333	1.29136	1.33052	1.0171
		1.37667	1.12878	1.24883	1.14026	1.10411	1.03959	1.09633	1.08339	1.292	1.32986	1.01953
		1.38	1.13127	1.24749	1.14221	1.10685	1.04047	1.09596	1.08353	1.29319	1.33163	1.02138
		1.38333	1.13343	1.24781	1.14436	1.10862	1.04109	1.09885	1.08426	1.28849	1.3318	1.0223
		1.38667	1.1334	1.2503	1.14673	1.10828	1.04174	1.10015	1.08594	1.28658	1.33399	1.02344
		1.39	1.13471	1.25171	1.1487	1.11005	1.04345	1.10328	1.08831	1.28854	1.33504	1.02367
		1.39333	1.13421	1.25277	1.14826	1.10927	1.04594	1.10336	1.08845	1.29013	1.33841	1.02369
		1.39667	1.13485	1.25562	1.14899	1.10937	1.04713	1.10391	1.0911	1.29196	1.3404	1.02463
		1.4	1.13545	1.25585	1.14927	1.1083	1.0484	1.10618	1.09264	1.29618	1.34258	1.02592
		1.40333	1.13692	1.25675	1.14971	1.11042	1.04971	1.10864	1.0917	1.29996	1.34353	1.02578
		1.40667	1.13783	1.25741	1.14916	1.11228	1.05039	1.10847	1.09122	1.30297	1.34347	1.0263
		1.41	1.13884	1.25655	1.15132	1.11586	1.05028	1.11031	1.09241	1.30629	1.34294	1.02709
		1.41333	1.13962	1.25737	1.15336	1.11462	1.05151	1.11142	1.09266	1.30769	1.34321	1.02834
		1.41667	1.1427	1.2594	1.15437	1.11944	1.05217	1.11018	1.09343	1.31161	1.34364	1.02946
		1.42	1.1437	1.2613	1.1551	1.12103	1.054	1.11237	1.09526	1.31412	1.3443	1.03162
		1.42333	1.1444	1.26051	1.1574	1.12098	1.0555	1.11577	1.09812	1.31432	1.34687	1.03328
		1.42667	1.14543	1.26449	1.15876	1.12024	1.0563	1.11722	1.10006	1.31373	1.34878	1.03444
		1.43	1.14673	1.26655	1.15903	1.12453	1.05758	1.11937	1.10007	1.31279	1.35016	1.03539
		1.43333	1.14663	1.26851	1.15834	1.12321	1.05905	1.11974	1.10223	1.31318	1.35103	1.03489
		1.43667	1.14667	1.27564	1.16212	1.12516	1.05988	1.11837	1.10258	1.30969	1.35302	1.03529
		1.44	1.14806	1.27866	1.16312	1.12731	1.0603	1.1175	1.10341	1.30903	1.3537	1.03705
		1.44333	1.14966	1.27707	1.16393	1.1286	1.06126	1.11855	1.10346	1.30855	1.35565	1.03709
		1.44667	1.15031	1.27837	1.1646	1.12924	1.062	1.12024	1.10541	1.30925	1.35633	1.03859
		1.45	1.15101	1.28232	1.16746	1.13067	1.06259	1.12119	1.10542	1.30777	1.35726	1.04095
		1.45333	1.15343	1.2783	1.16562	1.13143	1.06381	1.1237	1.1075	1.31307	1.35947	1.04173
		1.45667	1.15586	1.27611	1.16505	1.13188	1.06397	1.12368	1.1077	1.31413	1.35854	1.04224
		1.46	1.15711	1.27875	1.16598	1.13239	1.06526	1.12475	1.10818	1.31735	1.3581	1.0432
		1.46333	1.16008	1.28105	1.16851	1.13459	1.06588	1.12773	1.11018	1.31961	1.35921	1.04402
		1.46667	1.15944	1.28319	1.16947	1.13486	1.06757	1.12625	1.11085	1.32163	1.36089	1.04319
		1.47	1.16071	1.28357	1.16936	1.13673	1.06701	1.12306	1.112	1.32248	1.36212	1.04443
		1.47333	1.1604	1.28982	1.17161	1.13703	1.06862	1.12571	1.11264	1.3246	1.36382	1.04507
		1.47667	1.16122	1.29175	1.17295	1.13944	1.06861	1.12595	1.11487	1.32167	1.3646	1.04629
		1.48	1.16096	1.28871	1.17228	1.14036	1.07007	1.12547	1.11412	1.32462	1.36642	1.04669
		1.48333	1.16238	1.28783	1.17216	1.14237	1.07113	1.13054	1.11566	1.3229	1.36677	1.0479
		1.48667	1.16182	1.28918	1.17531	1.14315	1.07262	1.13719	1.11563	1.32117	1.36671	1.04895
		1.49	1.16464	1.28706	1.1756	1.14328	1.07499	1.13739	1.11806	1.32018	1.36874	1.05036
		1.49333	1.16442	1.29009	1.17631	1.14413	1.07714	1.14074	1.11892	1.32214	1.36945	1.05117
		1.49667	1.16381	1.29358	1.17829	1.14458	1.07726	1.13654	1.12105	1.32357	1.37118	1.0518
		1.5	1.1637	1.29131	1.18111	1.14468	1.07728	1.13733	1.12238	1.32565	1.3724	1.05373
		1.50333	1.16437	1.29438	1.17956	1.14511	1.07872	1.13817	1.12357	1.32776	1.37305	1.05515
		1.50667	1.16385	1.29332	1.18215	1.1468	1.07855	1.14041	1.12278	1.33007	1.37395	1.05551
		1.51	1.16664	1.29249	1.18433	1.14882	1.07932	1.13792	1.12481	1.33181	1.37586	1.05642
		1.51333	1.16898	1.29044	1.18579	1.14888	1.08187	1.14363	1.12437	1.33045	1.37506	1.05597
		1.51667	1.17233	1.29104	1.18587	1.15164	1.08365	1.14308	1.12422	1.33454	1.37528	1.05681
		1.52	1.17535	1.28724	1.18749	1.15232	1.08542	1.14168	1.12404	1.33527	1.37633	1.05769
		1.52333	1.17712	1.29119	1.18761	1.15441	1.08596	1.14251	1.12528	1.33758	1.3777	1.05746
		1.52667	1.17719	1.29307	1.18762	1.15622	1.08746	1.14415	1.12364	1.33879	1.37822	1.06006
		1.53	1.17658	1.29756	1.18797	1.15695	1.08695	1.14608	1.12455	1.3397	1.38011	1.06244
		1.53333	1.17701	1.29771	1.18782	1.15738	1.08679	1.1463	1.12611	1.33871	1.38096	1.06442
		1.53667	1.17671	1.30215	1.18952	1.15879	1.08645	1.15116	1.12848	1.33766	1.38137	1.0641
		1.54	1.17757	1.30113	1.18959	1.15921	1.08803	1.15262	1.12999	1.33704	1.38208	1.06526
		1.54333	1.17822	1.30065	1.19021	1.15979	1.08828	1.15658	1.13238	1.33786	1.38098	1.06463
		1.54667	1.1782	1.30003	1.18918	1.16172	1.09081	1.15801	1.13459	1.33686	1.37951	1.0656
		1.55	1.17852	1.30357	1.18999	1.16312	1.09208	1.16021	1.13493	1.3369	1.38145	1.06438
		1.55333	1.18086	1.30518	1.19068	1.16368	1.09277	1.15962	1.13642	1.33906	1.38448	1.06538
		1.55667	1.18149	1.30952	1.19394	1.16324	1.09462	1.15998	1.13716	1.33683	1.38463	1.06769
		1.56	1.18339	1.31236	1.19344	1.16283	1.09547	1.16026	1.13779	1.33698	1.38809	1.06842
		1.56333	1.18583	1.31449	1.19496	1.16467	1.09473	1.16189	1.13862	1.33954	1.39047	1.06834
		1.56667	1.18604	1.31422	1.19649	1.16485	1.09632	1.15933	1.13988	1.34032	1.39017	1.06824
		1.57	1.18475	1.31238	1.19785	1.16638	1.09754	1.15971	1.14016	1.34193	1.38933	1.06836
		1.57333	1.1856	1.31088	1.19543	1.16884	1.09816	1.1626	1.14224	1.34591	1.38956	1.06776
		1.57667	1.18819	1.31101	1.19734	1.16864	1.09944	1.16208	1.14291	1.34892	1.39017	1.06845
		1.58	1.18905	1.31062	1.19921	1.16862	1.10142	1.16107	1.14344	1.34795	1.39155	1.06977
		1.58333	1.19252	1.31019	1.19929	1.16968	1.10178	1.16646	1.14464	1.34832	1.39379	1.07195
		1.58667	1.19243	1.30895	1.20073	1.17076	1.10433	1.16583	1.14469	1.34874	1.39467	1.07337
		1.59	1.19257	1.30922	1.2046	1.17109	1.10462	1.1653	1.14379	1.34863	1.39561	1.07411
		1.59333	1.19005	1.31073	1.20546	1.17271	1.10647	1.16527	1.14528	1.34769	1.39747	1.07475
		1.59667	1.19259	1.31412	1.20542	1.17241	1.10813	1.16696	1.14537	1.35001	1.39793	1.07565
		1.6	1.19255	1.31401	1.20675	1.17399	1.11039	1.16702	1.14522	1.3527	1.39816	1.07722
		1.60333	1.19435	1.3193	1.20639	1.17439	1.10942	1.16915	1.14592	1.35371	1.39985	1.07844
		1.60667	1.19659	1.32054	1.2077	1.17507	1.11198	1.16946	1.14869	1.35402	1.3995	1.08005
		1.61	1.19763	1.32271	1.2093	1.17693	1.11177	1.1722	1.14849	1.35524	1.39833	1.08153
		1.61333	1.19622	1.32157	1.20985	1.17894	1.11295	1.17242	1.1497	1.35737	1.39922	1.08156
		1.61667	1.19659	1.32687	1.21028	1.18145	1.11339	1.17258	1.15064	1.35685	1.3996	1.08118
		1.62	1.19871	1.32525	1.21123	1.18019	1.11557	1.17345	1.15172	1.35758	1.39958	1.08255
		1.62333	1.19829	1.32815	1.21032	1.18084	1.11535	1.17452	1.15213	1.35644	1.40195	1.0835
		1.62667	1.19993	1.32563	1.21163	1.1827	1.11724	1.17652	1.1535	1.35622	1.40381	1.08445
		1.63	1.20292	1.32761	1.21305	1.18384	1.11669	1.17791	1.15399	1.35716	1.40429	1.08597
		1.63333	1.20381	1.32442	1.21524	1.18315	1.11647	1.1792	1.15502	1.36005	1.40394	1.08653
		1.63667	1.20441	1.32744	1.2161	1.18813	1.11735	1.18088	1.15524	1.3608	1.40556	1.08586
		1.64	1.20583	1.32449	1.21591	1.19	1.11929	1.18181	1.15641	1.36348	1.40458	1.08506
		1.64333	1.20468	1.3255	1.21495	1.18785	1.11933	1.18227	1.15643	1.36509	1.40443	1.08544
		1.64667	1.20569	1.3238	1.21619	1.18824	1.1216	1.18245	1.15839	1.36469	1.40537	1.08556
		1.65	1.20511	1.32588	1.21583	1.18677	1.12324	1.18345	1.15933	1.36406	1.4078	1.0857
		1.65333	1.20381	1.32869	1.2159	1.18483	1.12379	1.18297	1.1604	1.3636	1.40831	1.086
		1.65667	1.20525	1.33055	1.21698	1.18691	1.12294	1.18252	1.16115	1.36456	1.41096	1.08727
		1.66	1.20718	1.32973	1.21823	1.18953	1.12364	1.18044	1.16242	1.36633	1.41344	1.08654
		1.66333	1.20568	1.33506	1.21738	1.19058	1.12228	1.18322	1.16233	1.36508	1.41463	1.08774
		1.66667	1.20805	1.33668	1.21883	1.19323	1.12343	1.1839	1.16327	1.36737	1.41614	1.08793
		1.67	1.20927	1.33488	1.22126	1.19536	1.12502	1.18517	1.16415	1.3687	1.4159	1.08954
		1.67333	1.20795	1.3382	1.22206	1.19627	1.12532	1.18597	1.16361	1.36759	1.41827	1.09001
		1.67667	1.20784	1.33853	1.22202	1.19747	1.12719	1.18905	1.1645	1.36873	1.4189	1.09163
		1.68	1.20997	1.338	1.22316	1.19884	1.12904	1.18775	1.16486	1.37121	1.41872	1.09291
		1.68333	1.2102	1.33929	1.22351	1.19935	1.12866	1.19099	1.16537	1.36947	1.41808	1.09327
		1.68667	1.21107	1.34084	1.22388	1.19817	1.12855	1.19206	1.16534	1.36956	1.41999	1.09332
		1.69	1.21528	1.34335	1.22542	1.19888	1.13003	1.19718	1.16687	1.37268	1.41858	1.09365
		1.69333	1.21702	1.34478	1.22521	1.19955	1.13019	1.19741	1.16832	1.37073	1.4173	1.0939
		1.69667	1.2166	1.34551	1.22675	1.1983	1.1317	1.19751	1.16804	1.3733	1.41893	1.09353
		1.7	1.2166	1.34612	1.22822	1.19936	1.13263	1.19667	1.16877	1.37537	1.42122	1.09685
		1.70333	1.21766	1.34572	1.22788	1.20291	1.13271	1.19744	1.16996	1.37633	1.42117	1.09752
		1.70667	1.21616	1.34414	1.22965	1.20222	1.13444	1.19484	1.17143	1.37796	1.42298	1.09879
		1.71	1.21744	1.34732	1.23388	1.20303	1.1341	1.19514	1.17232	1.37972	1.42453	1.09911
		1.71333	1.21768	1.34848	1.23341	1.20515	1.13377	1.19756	1.17506	1.3763	1.42551	1.0998
		1.71667	1.21941	1.34792	1.23253	1.20652	1.13505	1.19596	1.17591	1.37469	1.42532	1.09983
		1.72	1.21974	1.34752	1.23449	1.20524	1.13593	1.1983	1.17733	1.37805	1.42721	1.101
		1.72333	1.22159	1.34964	1.23334	1.20651	1.13614	1.20002	1.17657	1.37846	1.42769	1.10144
		1.72667	1.22154	1.34908	1.23246	1.20747	1.13776	1.20103	1.17662	1.37949	1.42855	1.10276
		1.73	1.22405	1.34928	1.23604	1.20889	1.13783	1.19878	1.17745	1.38093	1.42843	1.10352
		1.73333	1.22438	1.35189	1.23856	1.20853	1.1393	1.2018	1.17822	1.38205	1.42826	1.1039
		1.73667	1.22459	1.35336	1.23841	1.20955	1.13918	1.20126	1.17779	1.37926	1.42863	1.10494
		1.74	1.22468	1.35291	1.24055	1.21118	1.14044	1.20291	1.17988	1.37798	1.42875	1.1057
		1.74333	1.22537	1.35498	1.24113	1.21131	1.14119	1.20327	1.18065	1.37622	1.429	1.10717
		1.74667	1.22518	1.35507	1.23922	1.21012	1.14237	1.20579	1.18188	1.37585	1.42933	1.10795
		1.75	1.22752	1.35348	1.23974	1.21059	1.14393	1.20751	1.18104	1.37478	1.42953	1.10938
		1.75333	1.22993	1.35422	1.24058	1.21229	1.14523	1.20513	1.18376	1.3782	1.42988	1.10954
		1.75667	1.23054	1.35542	1.24245	1.21115	1.14563	1.20523	1.18424	1.3792	1.42966	1.11047
		1.76	1.23138	1.35369	1.24302	1.21222	1.14607	1.20874	1.18441	1.38068	1.43051	1.11012
		1.76333	1.23311	1.35273	1.24445	1.21452	1.14825	1.20945	1.18505	1.38338	1.43222	1.10927
		1.76667	1.23232	1.35472	1.24372	1.21636	1.14548	1.20862	1.18726	1.38799	1.43278	1.10772
		1.77	1.23262	1.35545	1.24396	1.21709	1.14654	1.21121	1.1868	1.38541	1.43363	1.10859
		1.77333	1.23378	1.35663	1.24464	1.21662	1.14731	1.21342	1.18724	1.38582	1.43444	1.10945
		1.77667	1.23465	1.35864	1.24572	1.2168	1.14743	1.21303	1.18856	1.38773	1.43513	1.11068
		1.78	1.23225	1.36211	1.24652	1.21972	1.14703	1.2142	1.18775	1.38979	1.43418	1.11213
		1.78333	1.23249	1.36331	1.24838	1.21954	1.14914	1.2157	1.18817	1.39097	1.43589	1.11342
		1.78667	1.23301	1.36364	1.25006	1.22015	1.15138	1.21883	1.18877	1.39538	1.43639	1.11334
		1.79	1.23381	1.3636	1.25025	1.22308	1.15152	1.21852	1.1883	1.39664	1.43644	1.11316
		1.79333	1.2349	1.36588	1.24933	1.22349	1.15288	1.2178	1.18775	1.39724	1.43674	1.1147
		1.79667	1.23574	1.36362	1.25034	1.22153	1.15374	1.22036	1.18908	1.39645	1.4381	1.1163
		1.8	1.23521	1.36433	1.24946	1.22184	1.15661	1.21609	1.1896	1.39496	1.43921	1.1169
		1.80333	1.23608	1.36436	1.24924	1.22191	1.15594	1.21923	1.19044	1.39394	1.44068	1.11788
		1.80667	1.23581	1.36413	1.24812	1.22269	1.15578	1.21852	1.19321	1.39551	1.44321	1.11931
		1.81	1.23476	1.36349	1.24946	1.2237	1.15682	1.21975	1.19413	1.39482	1.44407	1.11912
		1.81333	1.23873	1.36365	1.24805	1.22369	1.15748	1.21775	1.19491	1.39238	1.44461	1.11966
		1.81667	1.2421	1.36343	1.24971	1.22572	1.15688	1.22148	1.19565	1.39211	1.44327	1.12058
		1.82	1.24262	1.36664	1.2503	1.22401	1.15911	1.21923	1.19657	1.39137	1.44147	1.12096
		1.82333	1.24395	1.36721	1.25015	1.22418	1.16124	1.21737	1.195	1.39004	1.44267	1.12166
		1.82667	1.24612	1.3674	1.25066	1.22532	1.16101	1.2179	1.19572	1.39122	1.44442	1.12374
		1.83	1.24441	1.36771	1.25171	1.2266	1.16218	1.21754	1.19665	1.39413	1.44428	1.12241
		1.83333	1.24181	1.37003	1.2511	1.22603	1.16288	1.21827	1.19881	1.39507	1.44597	1.12223
		1.83667	1.24326	1.36949	1.25165	1.22944	1.16239	1.21601	1.19805	1.39894	1.44899	1.12206
		1.84	1.24239	1.36907	1.25448	1.231	1.16153	1.21791	1.19999	1.4009	1.44951	1.12184
		1.84333	1.24146	1.37112	1.25375	1.23043	1.16252	1.21969	1.19935	1.4017	1.4498	1.12021
		1.84667	1.24205	1.37378	1.25438	1.23106	1.16249	1.22205	1.20033	1.40161	1.45122	1.12167
		1.85	1.24461	1.37215	1.25669	1.23256	1.16254	1.22364	1.19793	1.4038	1.45321	1.12406
		1.85333	1.24437	1.37025	1.25673	1.2337	1.16314	1.22532	1.20057	1.40131	1.45228	1.12548
		1.85667	1.24674	1.37285	1.25677	1.23372	1.1646	1.22752	1.2012	1.40209	1.45281	1.12584
		1.86	1.2485	1.37164	1.25916	1.23615	1.16524	1.22823	1.20296	1.40143	1.45292	1.12582
		1.86333	1.25141	1.37174	1.26261	1.23747	1.16586	1.22879	1.20217	1.40327	1.45381	1.12692
		1.86667	1.25272	1.37245	1.26266	1.23791	1.16637	1.22982	1.20457	1.40405	1.45384	1.1259
		1.87	1.25201	1.37495	1.26322	1.23752	1.16664	1.23084	1.20382	1.40392	1.45374	1.1255
		1.87333	1.25254	1.37621	1.26451	1.23735	1.16794	1.23115	1.20531	1.40375	1.45346	1.12488
		1.87667	1.25168	1.37634	1.26599	1.23693	1.16864	1.22683	1.20785	1.40348	1.45478	1.12519
		1.88	1.25065	1.37673	1.26485	1.23669	1.17026	1.23165	1.20726	1.4045	1.45451	1.12538
		1.88333	1.25042	1.37546	1.2649	1.23867	1.17206	1.23083	1.20677	1.40333	1.45422	1.12518
		1.88667	1.25111	1.37623	1.26593	1.23918	1.17218	1.2325	1.20825	1.40424	1.45732	1.12766
		1.89	1.25229	1.37792	1.26543	1.23949	1.17209	1.23355	1.20807	1.40374	1.45728	1.13078
		1.89333	1.25468	1.38123	1.26295	1.24098	1.17355	1.23788	1.20777	1.40653	1.45729	1.13249
		1.89667	1.25373	1.38115	1.26361	1.24303	1.17331	1.23417	1.20908	1.4066	1.45877	1.13389
		1.9	1.25347	1.3858	1.26436	1.24217	1.17218	1.23593	1.21032	1.40505	1.46066	1.13692
		1.90333	1.25583	1.38695	1.26534	1.24089	1.17283	1.23646	1.2096	1.40599	1.46034	1.13621
		1.90667	1.25597	1.38761	1.26609	1.244	1.17331	1.23819	1.21007	1.40802	1.46272	1.13763
		1.91	1.25679	1.38604	1.2687	1.2432	1.17371	1.23893	1.20949	1.4074	1.46381	1.13791
		1.91333	1.2585	1.38543	1.26832	1.24175	1.17415	1.23939	1.21057	1.40898	1.46539	1.13712
		1.91667	1.25972	1.38385	1.27122	1.24457	1.17654	1.2403	1.21174	1.4131	1.46567	1.13672
		1.92	1.25959	1.3815	1.27126	1.2465	1.17642	1.23887	1.21219	1.41668	1.4668	1.13721
		1.92333	1.25891	1.37754	1.27272	1.24652	1.1777	1.23872	1.21168	1.41704	1.46666	1.13527
		1.92667	1.25956	1.37907	1.27264	1.24793	1.17734	1.24073	1.21201	1.41836	1.46641	1.13616
		1.93	1.26107	1.37927	1.27398	1.25	1.17612	1.24135	1.21221	1.41757	1.46703	1.13657
		1.93333	1.26113	1.38168	1.27053	1.24816	1.17606	1.24145	1.21281	1.41736	1.46672	1.13759
		1.93667	1.26042	1.38463	1.2712	1.24956	1.17691	1.24055	1.21411	1.4148	1.46664	1.13713
		1.94	1.26358	1.38607	1.27067	1.24941	1.17611	1.24203	1.21749	1.41171	1.4661	1.13783
		1.94333	1.26538	1.3855	1.27249	1.24956	1.17522	1.24251	1.21844	1.41215	1.46624	1.1382
		1.94667	1.26537	1.38814	1.27268	1.24825	1.17713	1.24444	1.22065	1.41162	1.46413	1.13974
		1.95	1.26577	1.38676	1.27555	1.24963	1.17752	1.24533	1.22091	1.409	1.46477	1.13903
		1.95333	1.26843	1.38482	1.27632	1.2509	1.17751	1.25193	1.22101	1.40973	1.46457	1.14057
		1.95667	1.26584	1.38804	1.27734	1.25231	1.17826	1.25154	1.22102	1.41228	1.46616	1.14088
		1.96	1.26483	1.39081	1.27714	1.25273	1.17902	1.25013	1.22053	1.41009	1.46773	1.14055
		1.96333	1.26659	1.39124	1.27729	1.25606	1.17803	1.2505	1.22	1.41242	1.47021	1.14091
		1.96667	1.26855	1.39192	1.27626	1.25586	1.1778	1.24962	1.21995	1.41524	1.47077	1.14108
		1.97	1.26818	1.39478	1.27555	1.25748	1.1782	1.24691	1.22133	1.41551	1.47146	1.14113
		1.97333	1.27051	1.3933	1.27569	1.25685	1.1781	1.24881	1.22023	1.41576	1.47162	1.14201
		1.97667	1.27102	1.39218	1.27526	1.25595	1.17693	1.25006	1.22122	1.41883	1.4706	1.14294
		1.98	1.26972	1.39354	1.27595	1.25597	1.17728	1.2491	1.22138	1.42162	1.47167	1.14408
		1.98333	1.26966	1.39368	1.27755	1.25851	1.17475	1.2496	1.2219	1.42295	1.47306	1.1443
		1.98667	1.27133	1.3953	1.27984	1.25652	1.17469	1.25035	1.22303	1.4235	1.47202	1.14565
		1.99	1.27405	1.3972	1.28034	1.25748	1.17454	1.24826	1.22408	1.42753	1.47303	1.14665
		1.99333	1.27345	1.39876	1.28105	1.26017	1.17605	1.25124	1.22613	1.42816	1.47493	1.14566
		1.99667	1.27646	1.39921	1.28104	1.2586	1.1745	1.25293	1.22696	1.42803	1.47478	1.14461
		2	1.27694	1.40237	1.28255	1.2578	1.17588	1.25513	1.22667	1.42697	1.47501	1.1462
		2.00333	1.27518	1.4002	1.28186	1.25734	1.17437	1.25484	1.22533	1.42799	1.47819	1.14631
		2.00667	1.27348	1.39778	1.28093	1.25774	1.17345	1.25669	1.22568	1.42521	1.47942	1.14769
		2.01	1.27683	1.39913	1.28235	1.25703	1.1732	1.25438	1.22579	1.42576	1.47963	1.14935
		2.01333	1.27551	1.3994	1.28179	1.2572	1.17485	1.25333	1.22463	1.42224	1.48035	1.14973
		2.01667	1.27688	1.39853	1.28078	1.25794	1.17613	1.25354	1.22699	1.42137	1.48061	1.14938
		2.02	1.27862	1.40169	1.27982	1.25907	1.17881	1.25535	1.22848	1.42183	1.4807	1.14979
		2.02333	1.27939	1.40605	1.2815	1.26039	1.18037	1.25614	1.22918	1.42351	1.48148	1.14784
		2.02667	1.27857	1.40098	1.28246	1.26324	1.18004	1.2574	1.22857	1.4243	1.48273	1.14912
		2.03	1.27939	1.4021	1.28524	1.26456	1.18022	1.25786	1.23007	1.42518	1.48186	1.15076
		2.03333	1.27987	1.40342	1.28538	1.26364	1.18153	1.25928	1.22888	1.42648	1.48276	1.15103
		2.03667	1.28038	1.40297	1.28925	1.26503	1.18067	1.2601	1.2297	1.42553	1.48261	1.15133
		2.04	1.28094	1.40295	1.28971	1.26522	1.18117	1.25992	1.22937	1.42546	1.48147	1.1544
		2.04333	1.28277	1.40775	1.28814	1.2644	1.18277	1.2617	1.23022	1.42532	1.48155	1.15419
		2.04667	1.28368	1.40911	1.28739	1.26606	1.18403	1.26344	1.23195	1.42695	1.48446	1.15353
		2.05	1.28442	1.41027	1.28798	1.26872	1.18364	1.26372	1.23329	1.4283	1.48434	1.15488
		2.05333	1.28582	1.41238	1.28695	1.26955	1.18311	1.26498	1.23421	1.4289	1.48434	1.1548
		2.05667	1.28728	1.40979	1.28674	1.26916	1.18324	1.26369	1.23694	1.43136	1.48571	1.15401
		2.06	1.28675	1.40852	1.28898	1.26927	1.18357	1.26433	1.23669	1.43208	1.48513	1.15487
		2.06333	1.2874	1.40666	1.29072	1.26956	1.18273	1.26276	1.23867	1.43389	1.48383	1.15648
		2.06667	1.28761	1.40895	1.29094	1.26734	1.18366	1.26484	1.23938	1.43599	1.48476	1.15697
		2.07	1.28658	1.40684	1.29129	1.26989	1.1845	1.26446	1.23896	1.43771	1.48628	1.1583
		2.07333	1.28747	1.40633	1.29157	1.27164	1.18464	1.2671	1.23807	1.43686	1.48562	1.15935
		2.07667	1.28805	1.40663	1.29203	1.27162	1.18555	1.26869	1.23989	1.43621	1.48651	1.16001
		2.08	1.28831	1.40884	1.29143	1.26957	1.18584	1.26843	1.23873	1.43572	1.48836	1.16012
		2.08333	1.28823	1.40257	1.29212	1.27176	1.18505	1.26914	1.24026	1.43255	1.4894	1.16054
		2.08667	1.28898	1.40289	1.29165	1.27086	1.18759	1.26952	1.23998	1.43371	1.49004	1.16121
		2.09	1.28848	1.40563	1.29407	1.27174	1.18698	1.26819	1.23979	1.43312	1.49237	1.16014
		2.09333	1.28959	1.40801	1.294	1.27425	1.18697	1.26748	1.24	1.43502	1.49185	1.15972
		2.09667	1.29024	1.40819	1.29542	1.27774	1.18915	1.27325	1.24036	1.43452	1.49072	1.1605
		2.1	1.29075	1.41367	1.2953	1.27711	1.18934	1.27104	1.23898	1.43745	1.48923	1.16124
		2.10333	1.29289	1.41662	1.29711	1.27834	1.18824	1.27195	1.23939	1.43838	1.48943	1.15992
		2.10667	1.29198	1.42205	1.2972	1.27825	1.18996	1.27538	1.24288	1.43913	1.48823	1.16081
		2.11	1.29165	1.42036	1.30001	1.27786	1.19098	1.27538	1.24274	1.43903	1.48919	1.16067
		2.11333	1.29207	1.42086	1.2996	1.27755	1.19047	1.27416	1.24292	1.44063	1.49107	1.16165
		2.11667	1.2926	1.4203	1.30199	1.27984	1.19067	1.27401	1.24409	1.44149	1.49359	1.16006
		2.12	1.29318	1.42178	1.30226	1.27834	1.19164	1.27403	1.24583	1.44084	1.49392	1.16112
		2.12333	1.29571	1.41957	1.30262	1.27922	1.19247	1.27346	1.24439	1.44138	1.49483	1.16153
		2.12667	1.2969	1.42234	1.29934	1.28026	1.19234	1.27321	1.24593	1.44199	1.49688	1.16272
		2.13	1.29912	1.42082	1.30075	1.28102	1.19276	1.27252	1.2461	1.44257	1.49788	1.16325
		2.13333	1.29876	1.42024	1.30109	1.2814	1.1939	1.27605	1.24765	1.4404	1.49789	1.16563
		2.13667	1.29748	1.41853	1.30294	1.28352	1.19499	1.27623	1.24828	1.4407	1.49876	1.16527
		2.14	1.29848	1.41716	1.30314	1.28538	1.19513	1.27735	1.24938	1.44056	1.5005	1.16735
		2.14333	1.29707	1.41703	1.30674	1.28667	1.19483	1.27724	1.24954	1.44185	1.49878	1.16753
		2.14667	1.29465	1.41735	1.30675	1.28713	1.1956	1.27955	1.24993	1.44167	1.498	1.16716
		2.15	1.29651	1.41707	1.30617	1.28625	1.19729	1.27787	1.2479	1.44236	1.49825	1.16673
		2.15333	1.29689	1.41749	1.30618	1.2853	1.19548	1.27969	1.24764	1.44316	1.49899	1.17003
		2.15667	1.29598	1.42177	1.3055	1.28476	1.19567	1.28124	1.24867	1.44374	1.49799	1.17
		2.16	1.29757	1.42319	1.30473	1.2825	1.19819	1.28157	1.24837	1.4427	1.49931	1.17062
		2.16333	1.2998	1.42664	1.3055	1.28368	1.19823	1.27965	1.24939	1.44268	1.50011	1.16998
		2.16667	1.29875	1.43037	1.30757	1.28552	1.19757	1.28127	1.25199	1.44325	1.49989	1.17053
		2.17	1.29968	1.42988	1.30583	1.28787	1.19873	1.28133	1.25256	1.4442	1.49965	1.16994
		2.17333	1.30011	1.42465	1.30728	1.28948	1.20035	1.27984	1.25183	1.44358	1.49991	1.16877
		2.17667	1.3007	1.42262	1.30753	1.29274	1.19882	1.28074	1.25231	1.44531	1.50035	1.16983
		2.18	1.29961	1.42105	1.3068	1.29338	1.19919	1.28356	1.25339	1.44608	1.50098	1.17064
		2.18333	1.30173	1.4192	1.30577	1.29196	1.20026	1.28296	1.25368	1.44566	1.50216	1.17088
		2.18667	1.30224	1.41913	1.30647	1.29234	1.20114	1.28399	1.25456	1.44397	1.50146	1.17034
		2.19	1.30213	1.42478	1.30669	1.28977	1.20133	1.28371	1.25485	1.44476	1.50176	1.17056
		2.19333	1.30304	1.42662	1.30762	1.28798	1.20149	1.28426	1.25673	1.44518	1.50204	1.17068
		2.19667	1.30351	1.4292	1.30825	1.28865	1.20313	1.28375	1.25656	1.44488	1.50235	1.17071
		2.2	1.30297	1.42802	1.31112	1.29136	1.20301	1.28512	1.25572	1.44615	1.50217	1.17169
		2.20333	1.30301	1.42915	1.31277	1.291	1.20286	1.28656	1.25632	1.44828	1.50536	1.17343
		2.20667	1.30403	1.42765	1.31217	1.29195	1.20223	1.28704	1.25692	1.44871	1.50704	1.17408
		2.21	1.30174	1.42891	1.31401	1.29251	1.20464	1.28696	1.25583	1.44865	1.50852	1.17415
		2.21333	1.30447	1.42682	1.31317	1.29112	1.20352	1.28744	1.25714	1.44972	1.50786	1.17402
		2.21667	1.30641	1.42836	1.31117	1.28954	1.20452	1.28767	1.25847	1.45275	1.50869	1.17381
		2.22	1.30673	1.43076	1.31121	1.29019	1.207	1.28551	1.25851	1.45131	1.5081	1.17451
		2.22333	1.30809	1.43242	1.31372	1.2908	1.20703	1.28875	1.25892	1.44965	1.50708	1.1749
		2.22667	1.31063	1.43327	1.31259	1.29274	1.20551	1.29099	1.26076	1.45051	1.50754	1.17497
		2.23	1.30986	1.4345	1.31454	1.29471	1.20664	1.28999	1.26044	1.45218	1.50966	1.17549
		2.23333	1.31041	1.43511	1.31406	1.29491	1.20695	1.28931	1.25992	1.4534	1.51029	1.1763
		2.23667	1.31235	1.4348	1.3148	1.29588	1.20719	1.29113	1.26019	1.45813	1.51123	1.17562
		2.24	1.31315	1.43436	1.31453	1.29865	1.20826	1.28992	1.26068	1.46218	1.51232	1.17577
		2.24333	1.31371	1.4358	1.31442	1.29774	1.20835	1.29006	1.26092	1.46148	1.5128	1.17628
		2.24667	1.31321	1.43318	1.3141	1.29812	1.20878	1.29279	1.2616	1.46113	1.51199	1.17692
		2.25	1.3127	1.43516	1.3139	1.29928	1.20878	1.29188	1.26289	1.45957	1.51221	1.17721
		2.25333	1.31301	1.43613	1.31533	1.29852	1.20782	1.2908	1.26351	1.45725	1.51081	1.1777
		2.25667	1.31164	1.43575	1.31561	1.29706	1.20794	1.28947	1.26476	1.45786	1.51191	1.17917
		2.26	1.31239	1.43539	1.31737	1.29739	1.2094	1.2927	1.26427	1.45794	1.51127	1.17869
		2.26333	1.31355	1.43762	1.3193	1.29749	1.20978	1.29195	1.26367	1.45841	1.5122	1.17905
		2.26667	1.31377	1.43564	1.32158	1.29832	1.20979	1.29436	1.26349	1.45816	1.51308	1.1804
		2.27	1.31386	1.43397	1.32122	1.29967	1.21074	1.29538	1.26458	1.45593	1.51427	1.18052
		2.27333	1.3153	1.43369	1.32117	1.29982	1.21142	1.29867	1.26405	1.45333	1.51372	1.18045
		2.27667	1.31572	1.43252	1.32115	1.30195	1.21192	1.29791	1.2645	1.45298	1.5154	1.18193
		2.28	1.31738	1.43497	1.32147	1.30453	1.21125	1.29814	1.26535	1.45384	1.51588	1.18235
		2.28333	1.31773	1.43653	1.32161	1.30548	1.21167	1.29867	1.26674	1.45393	1.51521	1.18282
		2.28667	1.31913	1.43904	1.32001	1.30634	1.21141	1.29824	1.26615	1.45579	1.51681	1.18136
		2.29	1.3184	1.4414	1.32048	1.30839	1.21182	1.29638	1.26598	1.46111	1.51693	1.18124
		2.29333	1.31717	1.44196	1.3224	1.30737	1.21226	1.29613	1.26797	1.46454	1.51719	1.18092
		2.29667	1.3169	1.44185	1.32362	1.30736	1.21307	1.29716	1.26994	1.46436	1.51736	1.18148
		2.3	1.31841	1.4415	1.32335	1.30865	1.21357	1.29876	1.27023	1.46578	1.51845	1.18174
		2.30333	1.31645	1.44413	1.32534	1.30851	1.21402	1.30031	1.26974	1.46697	1.51869	1.1846
		2.30667	1.31861	1.44375	1.32639	1.30883	1.2146	1.30439	1.27056	1.46397	1.51967	1.18604
		2.31	1.3206	1.44616	1.32429	1.30892	1.21476	1.30107	1.27073	1.46132	1.51882	1.18631
		2.31333	1.32244	1.44752	1.32337	1.30711	1.21581	1.30461	1.26875	1.46221	1.51939	1.18787
		2.31667	1.32239	1.45311	1.32554	1.30795	1.21513	1.30155	1.2684	1.46328	1.52076	1.18714
		2.32	1.32312	1.44969	1.32497	1.30864	1.21596	1.30362	1.26982	1.4603	1.52146	1.18501
		2.32333	1.32104	1.44853	1.32416	1.30954	1.21538	1.30011	1.27121	1.46227	1.52087	1.18546
		2.32667	1.32104	1.44547	1.32553	1.31181	1.21599	1.3024	1.27142	1.4635	1.52206	1.18597
		2.33	1.31857	1.4428	1.3249	1.31277	1.21597	1.30049	1.27239	1.46386	1.52231	1.18585
		2.33333	1.31846	1.4395	1.32363	1.31191	1.21734	1.3039	1.27382	1.46271	1.52094	1.18682
		2.33667	1.32053	1.44062	1.32445	1.31173	1.2161	1.30195	1.27274	1.46653	1.52073	1.18812
		2.34	1.32252	1.4412	1.32574	1.30947	1.21799	1.30329	1.27285	1.46838	1.52193	1.18742
		2.34333	1.32381	1.44155	1.32734	1.31078	1.21777	1.30063	1.27204	1.46972	1.52166	1.18851
		2.34667	1.32507	1.44447	1.32924	1.31328	1.21836	1.29758	1.27187	1.469	1.52091	1.18979
		2.35	1.3241	1.44328	1.32906	1.31182	1.21819	1.29785	1.27172	1.47203	1.52348	1.18902
		2.35333	1.32493	1.44264	1.3297	1.31331	1.21955	1.29943	1.27338	1.47248	1.52365	1.18989
		2.35667	1.32408	1.44424	1.32917	1.31681	1.22005	1.30151	1.274	1.47078	1.52411	1.19149
		2.36	1.32193	1.44608	1.32728	1.31592	1.22012	1.30585	1.27483	1.47084	1.52616	1.19125
		2.36333	1.3234	1.44485	1.3264	1.31398	1.22147	1.31085	1.27554	1.47179	1.52806	1.19098
		2.36667	1.32629	1.44581	1.32782	1.31591	1.22157	1.30966	1.27633	1.46972	1.52812	1.19328
		2.37	1.32709	1.44708	1.3274	1.31675	1.22221	1.30733	1.27695	1.47	1.52697	1.19315
		2.37333	1.32967	1.44713	1.32848	1.31586	1.22118	1.30738	1.27664	1.46924	1.52771	1.19237
		2.37667	1.33218	1.44673	1.33068	1.31677	1.22237	1.3086	1.27795	1.46634	1.52767	1.19357
		2.38	1.33125	1.44926	1.33143	1.31733	1.22348	1.30765	1.2793	1.46508	1.52665	1.19253
		2.38333	1.33024	1.45136	1.33147	1.31962	1.22531	1.30995	1.28017	1.46566	1.52669	1.19164
		2.38667	1.32872	1.45056	1.33338	1.31986	1.22625	1.31299	1.28156	1.46559	1.52783	1.19298
		2.39	1.32872	1.44853	1.33378	1.32246	1.22625	1.31219	1.28215	1.46653	1.52844	1.19378
		2.39333	1.32973	1.45168	1.33337	1.32196	1.22548	1.31401	1.28248	1.46741	1.527	1.19345
		2.39667	1.33068	1.45184	1.33507	1.32133	1.2254	1.31367	1.28254	1.46889	1.52775	1.19367
		2.4	1.33189	1.45324	1.3356	1.32022	1.22534	1.31181	1.28261	1.46681	1.52713	1.19376
		2.40333	1.33328	1.45556	1.33526	1.31887	1.22519	1.30964	1.28234	1.46646	1.52766	1.19321
		2.40667	1.33186	1.45731	1.33548	1.31626	1.22657	1.31141	1.28376	1.46622	1.52816	1.19495
		2.41	1.33209	1.45478	1.33678	1.31627	1.22758	1.30978	1.28342	1.46657	1.52926	1.19569
		2.41333	1.33131	1.45361	1.33631	1.3181	1.2274	1.31062	1.28434	1.46699	1.53005	1.19646
		2.41667	1.33266	1.45226	1.33715	1.32122	1.22751	1.31178	1.28418	1.46929	1.53126	1.1966
		2.42	1.33341	1.4517	1.33749	1.32036	1.22785	1.31175	1.28297	1.47159	1.5319	1.19922
		2.42333	1.3353	1.45334	1.33855	1.32062	1.22575	1.31042	1.28316	1.47265	1.53274	1.199
		2.42667	1.33667	1.45515	1.33754	1.32207	1.22545	1.31139	1.28416	1.47573	1.53416	1.19898
		2.43	1.33724	1.45584	1.3393	1.31923	1.2255	1.30933	1.2838	1.47603	1.53323	1.19884
		2.43333	1.33719	1.4568	1.34057	1.316	1.2248	1.3092	1.2842	1.47474	1.53286	1.19934
		2.43667	1.33717	1.45551	1.33983	1.31916	1.22557	1.31178	1.2853	1.47639	1.53323	1.19815
		2.44	1.33487	1.45315	1.33825	1.31828	1.22771	1.31389	1.28442	1.47765	1.53217	1.19812
		2.44333	1.335	1.45282	1.34086	1.31767	1.22981	1.31385	1.28431	1.4771	1.53188	1.19944
		2.44667	1.33424	1.45426	1.33834	1.31954	1.22982	1.31432	1.28535	1.47757	1.53333	1.20027
		2.45	1.33364	1.45204	1.33772	1.32277	1.23053	1.31597	1.28574	1.48163	1.53364	1.20117
		2.45333	1.33486	1.45201	1.33974	1.3222	1.23054	1.31665	1.28554	1.48019	1.53364	1.20158
		2.45667	1.33834	1.45528	1.34144	1.32382	1.23152	1.31578	1.28661	1.47898	1.53401	1.20044
		2.46	1.33818	1.45734	1.33977	1.32364	1.23166	1.31715	1.28802	1.48062	1.53639	1.20027
		2.46333	1.34181	1.45788	1.3403	1.32403	1.23136	1.31814	1.28849	1.48136	1.53522	1.20177
		2.46667	1.34273	1.45826	1.3405	1.32328	1.23266	1.31704	1.28752	1.47988	1.53708	1.20213
		2.47	1.34153	1.46026	1.34118	1.32446	1.23487	1.31757	1.28883	1.48006	1.5388	1.20173
		2.47333	1.33981	1.45986	1.34069	1.32497	1.23355	1.3193	1.289	1.48251	1.53878	1.20258
		2.47667	1.33992	1.45958	1.34163	1.32657	1.23309	1.31741	1.28831	1.48189	1.5385	1.20333
		2.48	1.33939	1.45954	1.34348	1.32666	1.23322	1.31763	1.28871	1.48233	1.53923	1.20363
		2.48333	1.33727	1.45948	1.34384	1.32696	1.23405	1.31993	1.29005	1.48406	1.53856	1.20384
		2.48667	1.33758	1.45931	1.34215	1.32676	1.23306	1.32022	1.2888	1.48488	1.53813	1.20461
		2.49	1.33965	1.45997	1.34463	1.32669	1.23466	1.32058	1.29106	1.48469	1.5379	1.20532
		2.49333	1.33978	1.45873	1.34526	1.32585	1.23572	1.32211	1.29013	1.48587	1.53728	1.20575
		2.49667	1.34005	1.45903	1.34662	1.3281	1.23734	1.3216	1.28851	1.48777	1.53921	1.20577
		2.5	1.34136	1.46102	1.34627	1.32855	1.2366	1.32234	1.28766	1.48774	1.54026	1.20677
		2.50333	1.34257	1.46055	1.3483	1.33032	1.2357	1.321	1.2886	1.48739	1.54013	1.20643
		2.50667	1.34283	1.4594	1.34821	1.33098	1.23663	1.32306	1.28761	1.48423	1.54218	1.20839
		2.51	1.3449	1.46038	1.34809	1.33243	1.23614	1.32305	1.29016	1.48341	1.54263	1.20885
		2.51333	1.34504	1.46122	1.34707	1.33306	1.23643	1.32617	1.29115	1.48404	1.54224	1.20951
		2.51667	1.34666	1.46121	1.34795	1.33321	1.23745	1.32382	1.2922	1.48561	1.54239	1.20856
		2.52	1.34753	1.46197	1.34709	1.33335	1.23828	1.32531	1.29361	1.48567	1.54282	1.21038
		2.52333	1.34667	1.46389	1.34557	1.33296	1.2377	1.32395	1.29393	1.48937	1.54189	1.20834
		2.52667	1.34598	1.46415	1.3466	1.33305	1.23907	1.32473	1.29411	1.4909	1.54177	1.20829
		2.53	1.34631	1.4626	1.34719	1.3314	1.23759	1.32215	1.29282	1.48981	1.54279	1.20799
		2.53333	1.34714	1.46146	1.34736	1.33286	1.23789	1.32495	1.2932	1.48807	1.54293	1.20829
		2.53667	1.34561	1.46199	1.3483	1.33292	1.23844	1.32626	1.29553	1.48782	1.54305	1.20873
		2.54	1.34725	1.46264	1.34999	1.33561	1.2384	1.32573	1.29513	1.48463	1.5451	1.20993
		2.54333	1.34658	1.46495	1.34862	1.33711	1.23761	1.323	1.29431	1.48414	1.54582	1.21079
		2.54667	1.34567	1.46563	1.34916	1.33935	1.23921	1.32661	1.29688	1.48236	1.54575	1.21148
		2.55	1.34582	1.46754	1.34899	1.33775	1.23902	1.3249	1.29762	1.48274	1.54686	1.21262
		2.55333	1.34892	1.46981	1.34858	1.33838	1.23853	1.32469	1.2962	1.48369	1.54839	1.21343
		2.55667	1.34949	1.46861	1.34861	1.33754	1.24045	1.326	1.29601	1.48813	1.54765	1.21433
		2.56	1.35111	1.46923	1.34964	1.33737	1.24059	1.33171	1.29686	1.48814	1.54797	1.2139
		2.56333	1.35285	1.46859	1.34855	1.33728	1.24025	1.3332	1.29729	1.48833	1.54878	1.21477
		2.56667	1.35347	1.46847	1.34827	1.33897	1.24162	1.33508	1.29796	1.48812	1.54641	1.21449
		2.57	1.35271	1.4688	1.35023	1.33869	1.24189	1.33417	1.29773	1.48689	1.54686	1.2142
		2.57333	1.35426	1.46987	1.35069	1.34036	1.24221	1.33421	1.2986	1.48321	1.54719	1.21467
		2.57667	1.35576	1.46814	1.35143	1.34106	1.24232	1.3333	1.2993	1.4835	1.54666	1.21426
		2.58	1.35547	1.47058	1.35335	1.33902	1.244	1.33125	1.29973	1.48377	1.54676	1.21294
		2.58333	1.35513	1.46829	1.35672	1.33856	1.24357	1.33126	1.29945	1.48303	1.54837	1.21269
		2.58667	1.35451	1.46911	1.35662	1.33868	1.24451	1.33196	1.30013	1.48534	1.54785	1.21247
		2.59	1.35418	1.46903	1.35636	1.33942	1.24536	1.33064	1.3009	1.48799	1.54865	1.21216
		2.59333	1.35493	1.47219	1.35586	1.33928	1.2464	1.3281	1.29966	1.48676	1.55051	1.21352
		2.59667	1.35678	1.47103	1.35534	1.34026	1.24669	1.33056	1.29989	1.48654	1.54989	1.21436
		2.6	1.35879	1.4727	1.35366	1.34221	1.24731	1.33242	1.30119	1.48669	1.55025	1.21582
		2.60333	1.3611	1.47209	1.35446	1.33935	1.24767	1.33224	1.30223	1.4859	1.55013	1.21686
		2.60667	1.36083	1.4728	1.3558	1.33923	1.24686	1.33285	1.30207	1.48442	1.55076	1.21862
		2.61	1.35852	1.47158	1.35567	1.33957	1.24754	1.33109	1.30271	1.4859	1.54967	1.21909
		2.61333	1.35734	1.47299	1.35556	1.34245	1.24792	1.32866	1.30322	1.48899	1.5492	1.21969
		2.61667	1.3562	1.47476	1.35546	1.34232	1.24746	1.32782	1.30237	1.48949	1.54916	1.21935
		2.62	1.3546	1.47499	1.35446	1.3467	1.24777	1.33011	1.30157	1.48929	1.55104	1.21874
		2.62333	1.35523	1.47627	1.35597	1.3465	1.24715	1.33146	1.30168	1.49034	1.55041	1.21682
		2.62667	1.35617	1.47495	1.35807	1.34896	1.24653	1.33553	1.30258	1.48979	1.55166	1.21741
		2.63	1.35813	1.4738	1.35846	1.34799	1.24577	1.33715	1.30297	1.4912	1.55348	1.21758
		2.63333	1.36014	1.47435	1.35948	1.34901	1.24766	1.33583	1.30374	1.49417	1.55429	1.21827
		2.63667	1.36081	1.47466	1.36118	1.34945	1.24713	1.3319	1.30395	1.49713	1.55388	1.21972
		2.64	1.3619	1.47213	1.36023	1.35015	1.24884	1.33273	1.3035	1.49976	1.55441	1.22122
		2.64333	1.3617	1.47366	1.36058	1.34634	1.24915	1.3342	1.30486	1.50281	1.55421	1.22199
		2.64667	1.36153	1.47658	1.3609	1.34696	1.25059	1.33327	1.3045	1.50068	1.5535	1.22192
		2.65	1.36032	1.47838	1.36224	1.34656	1.24961	1.33673	1.30491	1.50078	1.55383	1.22269
		2.65333	1.35921	1.47945	1.36225	1.34601	1.25086	1.341	1.30698	1.49825	1.5544	1.22242
		2.65667	1.35982	1.48172	1.36151	1.3479	1.25153	1.33842	1.30892	1.4961	1.55558	1.22116
		2.66	1.36086	1.47804	1.35968	1.35051	1.25228	1.33495	1.30818	1.49503	1.55558	1.21998
		2.66333	1.36213	1.47814	1.36144	1.35015	1.25175	1.33656	1.30805	1.4959	1.55565	1.21964
		2.66667	1.36367	1.4771	1.36056	1.34944	1.25217	1.33458	1.30785	1.49282	1.55574	1.21937
		2.67	1.36494	1.4766	1.36056	1.35015	1.25221	1.3327	1.30701	1.49526	1.55519	1.21828
		2.67333	1.36401	1.47644	1.3622	1.3484	1.25119	1.33584	1.30554	1.49554	1.55351	1.22001
		2.67667	1.36334	1.48039	1.36171	1.34805	1.25002	1.338	1.30604	1.49392	1.5551	1.22108
		2.68	1.3612	1.47933	1.36143	1.34946	1.24906	1.33859	1.30576	1.49317	1.55687	1.22188
		2.68333	1.35992	1.47862	1.36291	1.34961	1.24914	1.34058	1.30724	1.4971	1.55718	1.22097
		2.68667	1.3603	1.47655	1.36143	1.3488	1.24961	1.34222	1.30767	1.49744	1.55743	1.22119
		2.69	1.36083	1.47791	1.36207	1.34953	1.25076	1.3419	1.30871	1.49916	1.55909	1.22137
		2.69333	1.36142	1.47759	1.36457	1.34898	1.25269	1.34324	1.30881	1.50112	1.55906	1.22051
		2.69667	1.36152	1.47765	1.36578	1.34804	1.25511	1.34484	1.31063	1.50169	1.55912	1.22042
		2.7	1.36394	1.47726	1.36668	1.34951	1.25569	1.34351	1.3089	1.49994	1.55861	1.22112
		2.70333	1.36509	1.47699	1.36821	1.35036	1.25673	1.34405	1.30888	1.4967	1.55878	1.22255
		2.70667	1.36404	1.47698	1.3678	1.351	1.25675	1.34248	1.30894	1.49666	1.56026	1.22207
		2.71	1.36568	1.47964	1.36823	1.3521	1.25712	1.34449	1.30924	1.49689	1.5606	1.22128
		2.71333	1.36786	1.48091	1.36714	1.3529	1.25558	1.34534	1.30847	1.49553	1.56029	1.22195
		2.71667	1.36593	1.48374	1.36536	1.35133	1.25667	1.3453	1.31028	1.49627	1.56159	1.22428
		2.72	1.36568	1.48567	1.36623	1.3509	1.25658	1.34449	1.31014	1.49806	1.56306	1.22365
		2.72333	1.36757	1.48471	1.36654	1.35042	1.25681	1.3472	1.3119	1.5002	1.56104	1.22557
		2.72667	1.36805	1.48332	1.36777	1.34982	1.25653	1.34583	1.3117	1.49862	1.56159	1.22729
		2.73	1.36756	1.48289	1.36917	1.35006	1.25918	1.34398	1.31229	1.49865	1.56258	1.22777
		2.73333	1.3669	1.48251	1.36949	1.35273	1.25873	1.34411	1.31211	1.49851	1.56273	1.22611
		2.73667	1.36755	1.47941	1.36957	1.3552	1.25735	1.3434	1.31133	1.49809	1.56287	1.22761
		2.74	1.36895	1.48681	1.36963	1.35524	1.25755	1.34194	1.31094	1.497	1.56402	1.22589
		2.74333	1.36917	1.4847	1.3691	1.35673	1.25754	1.34161	1.31375	1.49681	1.56384	1.22676
		2.74667	1.36837	1.48728	1.36779	1.35805	1.25515	1.34068	1.31448	1.49842	1.56402	1.2283
		2.75	1.36943	1.48618	1.36903	1.35644	1.2555	1.34164	1.31536	1.49869	1.5646	1.22717
		2.75333	1.36887	1.49011	1.36944	1.35534	1.25753	1.34344	1.31661	1.50016	1.56445	1.22807
		2.75667	1.36736	1.48461	1.37059	1.35693	1.25732	1.34442	1.31643	1.5019	1.56541	1.22895
		2.76	1.36613	1.48685	1.37109	1.35809	1.25819	1.34537	1.31448	1.50516	1.56618	1.22877
		2.76333	1.36816	1.48423	1.37167	1.35612	1.25961	1.34653	1.31458	1.50627	1.5663	1.22768
		2.76667	1.36887	1.48534	1.37133	1.35777	1.25903	1.34552	1.31363	1.50601	1.56593	1.22904
		2.77	1.37142	1.48567	1.37163	1.35846	1.25793	1.34667	1.31567	1.50618	1.56672	1.22694
		2.77333	1.37266	1.48659	1.37159	1.35688	1.25866	1.34775	1.31707	1.50323	1.56565	1.22895
		2.77667	1.37517	1.4877	1.3718	1.3554	1.25849	1.34828	1.31863	1.50237	1.56381	1.22826
		2.78	1.37517	1.48931	1.37175	1.35731	1.25876	1.34812	1.31756	1.50175	1.56342	1.22837
		2.78333	1.37807	1.48919	1.37263	1.35627	1.25921	1.34979	1.31917	1.50208	1.56452	1.22926
		2.78667	1.37803	1.49069	1.37201	1.3553	1.26086	1.35045	1.31855	1.50253	1.56448	1.23097
		2.79	1.37882	1.48887	1.37282	1.35717	1.26082	1.35062	1.31777	1.5039	1.56619	1.22978
		2.79333	1.3773	1.48635	1.37346	1.35845	1.26299	1.35089	1.31768	1.50418	1.56647	1.23024
		2.79667	1.37721	1.48291	1.37335	1.35776	1.26268	1.3524	1.31988	1.5061	1.56681	1.23173
		2.8	1.37543	1.48404	1.37394	1.35852	1.26263	1.35435	1.31858	1.5066	1.56683	1.2319
		2.80333	1.37549	1.48277	1.37545	1.36024	1.26239	1.35516	1.31907	1.50459	1.56647	1.23148
		2.80667	1.37412	1.48431	1.3752	1.36031	1.26345	1.35469	1.32005	1.50443	1.56658	1.23128
		2.81	1.37712	1.48708	1.37522	1.35921	1.26184	1.35431	1.32031	1.50507	1.56795	1.23229
		2.81333	1.37769	1.49156	1.37807	1.36103	1.26282	1.35665	1.31936	1.50289	1.57074	1.23127
		2.81667	1.37767	1.49184	1.3794	1.36103	1.26302	1.35574	1.31991	1.50612	1.57124	1.23227
		2.82	1.378	1.49142	1.37994	1.35978	1.26406	1.35642	1.31957	1.50959	1.57113	1.23426
		2.82333	1.38021	1.48959	1.37862	1.35853	1.26331	1.35479	1.31834	1.51123	1.57072	1.23513
		2.82667	1.37911	1.48998	1.37827	1.35972	1.26459	1.35696	1.31759	1.51264	1.57116	1.23565
		2.83	1.38066	1.48705	1.37685	1.35953	1.2636	1.35549	1.31946	1.51629	1.5708	1.23581
		2.83333	1.38212	1.48707	1.37498	1.35932	1.26339	1.35682	1.32196	1.51511	1.57066	1.23603
		2.83667	1.38275	1.48686	1.37399	1.36042	1.26306	1.35299	1.3224	1.5137	1.57299	1.23527
		2.84	1.3828	1.48992	1.37528	1.36047	1.26365	1.35781	1.32325	1.51493	1.57342	1.23564
		2.84333	1.38361	1.49009	1.37716	1.35973	1.26285	1.3545	1.32394	1.51336	1.57401	1.23582
		2.84667	1.3838	1.49409	1.3787	1.3587	1.26479	1.35518	1.32279	1.51043	1.57289	1.23687
		2.85	1.38379	1.49279	1.3799	1.36072	1.2665	1.35509	1.32238	1.51044	1.5726	1.23699
		2.85333	1.38262	1.49621	1.3811	1.36031	1.2684	1.35784	1.32243	1.50945	1.57032	1.23806
		2.85667	1.38226	1.49512	1.38325	1.35978	1.26989	1.35659	1.32321	1.50531	1.56974	1.23799
		2.86	1.38158	1.49454	1.38236	1.35959	1.27019	1.35873	1.32457	1.50598	1.57031	1.23732
		2.86333	1.38122	1.49218	1.38227	1.35878	1.27068	1.35774	1.32513	1.505	1.57187	1.23768
		2.86667	1.38206	1.4964	1.38117	1.35782	1.27059	1.35773	1.32364	1.50512	1.57342	1.23597
		2.87	1.38317	1.49299	1.38172	1.35778	1.26871	1.35674	1.32501	1.50755	1.57708	1.23674
		2.87333	1.38305	1.49885	1.37919	1.35927	1.2682	1.35779	1.32627	1.51049	1.57916	1.23716
		2.87667	1.38282	1.49446	1.37793	1.36102	1.26805	1.35841	1.32475	1.51243	1.57853	1.23721
		2.88	1.3812	1.49909	1.37966	1.36303	1.26633	1.36018	1.32599	1.51439	1.57769	1.237
		2.88333	1.38063	1.49163	1.38177	1.36482	1.26708	1.35884	1.32701	1.51451	1.57739	1.23852
		2.88667	1.37988	1.49391	1.38153	1.36638	1.26742	1.35984	1.32564	1.51216	1.57617	1.23702
		2.89	1.38055	1.48984	1.38323	1.3656	1.26719	1.35946	1.32489	1.5122	1.57512	1.23674
		2.89333	1.38364	1.49335	1.38467	1.36478	1.26854	1.35729	1.32765	1.51073	1.57515	1.23717
		2.89667	1.38544	1.49117	1.38241	1.36502	1.26897	1.35804	1.32779	1.50879	1.57535	1.23825
		2.9	1.38664	1.4959	1.38233	1.36195	1.26882	1.35927	1.32862	1.50774	1.57631	1.24014
		2.90333	1.38765	1.4981	1.38241	1.35862	1.26941	1.35898	1.32878	1.5107	1.57693	1.24004
		2.90667	1.38797	1.49629	1.38248	1.35985	1.26854	1.35859	1.32808	1.51011	1.5783	1.24078
		2.91	1.38644	1.49737	1.38488	1.36053	1.26765	1.36054	1.32629	1.51206	1.57845	1.24105
		2.91333	1.38707	1.49389	1.38505	1.36056	1.26834	1.36122	1.32651	1.51631	1.57869	1.24081
		2.91667	1.38599	1.49572	1.38471	1.36343	1.26948	1.36079	1.32696	1.51841	1.57884	1.23898
		2.92	1.38738	1.49433	1.38565	1.36609	1.27037	1.36221	1.32723	1.51834	1.57842	1.23916
		2.92333	1.38886	1.49425	1.38603	1.36666	1.27138	1.36191	1.32833	1.51926	1.57828	1.24004
		2.92667	1.38915	1.4955	1.38509	1.36583	1.27187	1.36027	1.33012	1.51907	1.57743	1.23939
		2.93	1.38919	1.49832	1.3864	1.36637	1.27201	1.36057	1.32941	1.51648	1.57882	1.23878
		2.93333	1.39149	1.49841	1.3866	1.36612	1.27254	1.36077	1.32915	1.51601	1.57735	1.24017
		2.93667	1.39159	1.49989	1.38643	1.36625	1.27192	1.36056	1.33103	1.51492	1.57837	1.24047
		2.94	1.39077	1.50251	1.387	1.36756	1.27298	1.35881	1.33146	1.51315	1.57874	1.23972
		2.94333	1.39162	1.50539	1.38792	1.36906	1.27361	1.36437	1.33105	1.51378	1.5809	1.24053
		2.94667	1.39345	1.50647	1.38728	1.36935	1.27512	1.36272	1.33048	1.51343	1.58073	1.24231
		2.95	1.39291	1.50601	1.38749	1.36891	1.27632	1.36299	1.33093	1.51263	1.58229	1.24122
		2.95333	1.39385	1.50619	1.38678	1.36951	1.27611	1.36233	1.32932	1.51514	1.58204	1.24339
		2.95667	1.39498	1.50578	1.38756	1.36982	1.27677	1.36466	1.3297	1.51773	1.58316	1.24466
		2.96	1.39631	1.50473	1.38716	1.37068	1.27698	1.36195	1.33081	1.51732	1.58173	1.24572
		2.96333	1.39671	1.50597	1.38842	1.37104	1.27633	1.36229	1.33216	1.5164	1.58206	1.24665
		2.96667	1.39706	1.50721	1.38747	1.37256	1.2751	1.36325	1.3322	1.51684	1.58201	1.24788
		2.97	1.39549	1.50717	1.38949	1.37219	1.27449	1.36452	1.33371	1.51279	1.58275	1.2455
		2.97333	1.39481	1.50744	1.38943	1.37322	1.27384	1.36448	1.33306	1.51363	1.58224	1.24525
		2.97667	1.3937	1.50687	1.38966	1.37305	1.27456	1.3654	1.33341	1.51504	1.58421	1.24532
		2.98	1.39342	1.5051	1.3889	1.37378	1.2753	1.36546	1.33461	1.51711	1.58471	1.24384
		2.98333	1.39326	1.5036	1.39054	1.37351	1.27472	1.36559	1.33526	1.51841	1.58467	1.24352
		2.98667	1.39449	1.50381	1.3916	1.37477	1.27666	1.36571	1.33486	1.52276	1.5841	1.24491
		2.99	1.39557	1.50404	1.39152	1.37455	1.27712	1.36659	1.33605	1.52059	1.58361	1.24605
		2.99333	1.39652	1.50386	1.39143	1.37645	1.27765	1.36667	1.33532	1.52125	1.58377	1.24594
		2.99667	1.3957	1.50204	1.39173	1.37586	1.27736	1.36732	1.33509	1.52294	1.58389	1.24598
		3	1.39446	1.50199	1.39149	1.37509	1.27903	1.36677	1.3339	1.52332	1.58324	1.24664
		3.00333	1.39436	1.50182	1.3914	1.37359	1.27954	1.3645	1.33468	1.52019	1.58413	1.24661
		3.00667	1.39427	1.49939	1.38966	1.37212	1.28079	1.36582	1.33424	1.52039	1.58405	1.24591
		3.01	1.39473	1.50131	1.38823	1.37182	1.27926	1.36439	1.3337	1.52098	1.58301	1.24589
		3.01333	1.39774	1.50275	1.3876	1.37257	1.27841	1.36805	1.33363	1.52135	1.5829	1.24739
		3.01667	1.40054	1.50366	1.38685	1.37402	1.27715	1.36587	1.33542	1.52432	1.58315	1.24768
		3.02	1.40094	1.50201	1.38492	1.37263	1.27776	1.37191	1.33593	1.52795	1.58317	1.24742
		3.02333	1.40169	1.50475	1.38733	1.37269	1.27669	1.36764	1.33695	1.53112	1.58401	1.24717
		3.02667	1.40067	1.50182	1.39073	1.37025	1.27729	1.37048	1.33846	1.53217	1.58661	1.24751
		3.03	1.40051	1.50313	1.39177	1.36801	1.27855	1.36728	1.33926	1.53147	1.58446	1.24715
		3.03333	1.4011	1.50076	1.39274	1.36941	1.28022	1.36915	1.33704	1.52821	1.58518	1.2469
		3.03667	1.40267	1.4997	1.394	1.37104	1.27924	1.36694	1.33675	1.52793	1.58484	1.24789
		3.04	1.40342	1.50081	1.39499	1.37151	1.27882	1.37163	1.33557	1.52623	1.58425	1.24882
		3.04333	1.40513	1.50447	1.39387	1.37428	1.27933	1.37211	1.33605	1.52094	1.58338	1.2497
		3.04667	1.40451	1.50523	1.39436	1.37613	1.28082	1.37238	1.33652	1.52182	1.5862	1.24997
		3.05	1.40519	1.50606	1.39468	1.375	1.2801	1.37268	1.3386	1.52328	1.58548	1.2505
		3.05333	1.40411	1.51017	1.39446	1.37604	1.28039	1.37366	1.33901	1.51982	1.58592	1.24958
		3.05667	1.40219	1.50978	1.39348	1.37614	1.28156	1.37119	1.34085	1.52025	1.5879	1.24931
		3.06	1.40249	1.5088	1.3928	1.37438	1.2837	1.37089	1.33967	1.52189	1.58892	1.2496
		3.06333	1.40154	1.50987	1.39281	1.37588	1.28307	1.37323	1.33883	1.51859	1.5888	1.24881
		3.06667	1.40086	1.51092	1.39292	1.37591	1.28402	1.37464	1.33823	1.51783	1.59136	1.24902
		3.07	1.40175	1.50646	1.39444	1.37562	1.28536	1.37562	1.33846	1.52025	1.59058	1.25022
		3.07333	1.40398	1.50501	1.39508	1.37653	1.2857	1.3742	1.33835	1.51858	1.58918	1.25049
		3.07667	1.40234	1.50464	1.39675	1.3767	1.28465	1.37391	1.33939	1.51904	1.58925	1.25091
		3.08	1.4039	1.50329	1.39799	1.37543	1.28575	1.37191	1.33863	1.52103	1.59001	1.25288
		3.08333	1.40403	1.50482	1.39983	1.3743	1.2844	1.37366	1.33925	1.52069	1.59022	1.25453
		3.08667	1.404	1.50921	1.39997	1.37561	1.28524	1.37191	1.33824	1.51936	1.59156	1.254
		3.09	1.40548	1.51143	1.40002	1.37581	1.28647	1.37647	1.3391	1.52059	1.5939	1.25477
		3.09333	1.40853	1.51235	1.39935	1.37581	1.28705	1.37679	1.33836	1.52394	1.59315	1.25475
		3.09667	1.40771	1.51116	1.39895	1.37528	1.28572	1.37542	1.3397	1.52243	1.59325	1.25308
		3.1	1.40844	1.51139	1.39826	1.37778	1.28711	1.37578	1.3401	1.52212	1.5919	1.25171
		3.10333	1.41102	1.50958	1.39723	1.37789	1.28604	1.37496	1.34149	1.52002	1.59151	1.25321
		3.10667	1.41073	1.51379	1.3967	1.3774	1.28536	1.37438	1.34247	1.52116	1.59069	1.25334
		3.11	1.40854	1.50929	1.39778	1.37882	1.28528	1.37196	1.34396	1.51794	1.59085	1.25423
		3.11333	1.41168	1.5136	1.39804	1.37943	1.28626	1.3751	1.34331	1.51814	1.59097	1.25473
		3.11667	1.41144	1.5155	1.39895	1.37829	1.28561	1.37562	1.3423	1.51851	1.59185	1.25587
		3.12	1.40933	1.51701	1.39954	1.37753	1.28604	1.37728	1.34318	1.52218	1.59264	1.2554
		3.12333	1.40637	1.51168	1.40116	1.37753	1.28691	1.37767	1.3414	1.52126	1.59268	1.2545
		3.12667	1.4081	1.51633	1.39906	1.37447	1.28474	1.38008	1.34229	1.52196	1.59367	1.25525
		3.13	1.40743	1.5134	1.39988	1.37514	1.28515	1.37891	1.3434	1.52542	1.59389	1.2546
		3.13333	1.40829	1.51268	1.39949	1.37614	1.28464	1.37794	1.34557	1.52621	1.59359	1.25372
		3.13667	1.40996	1.51002	1.40053	1.37734	1.28456	1.37713	1.34614	1.52838	1.59405	1.25357
		3.14	1.4119	1.51092	1.39994	1.37874	1.28337	1.37831	1.34672	1.53208	1.59476	1.25504
		3.14333	1.41085	1.51192	1.40157	1.38107	1.28728	1.38055	1.34556	1.53227	1.59482	1.25382
		3.14667	1.40989	1.51418	1.40204	1.38087	1.2874	1.37939	1.34723	1.53074	1.59562	1.25456
		3.15	1.40976	1.51492	1.40219	1.38262	1.28905	1.38251	1.34813	1.52948	1.59609	1.25516
		3.15333	1.40884	1.51663	1.40172	1.38592	1.28868	1.38187	1.3469	1.52913	1.59448	1.25508
		3.15667	1.40852	1.51536	1.40168	1.38742	1.28887	1.38007	1.34683	1.52764	1.59371	1.2543
		3.16	1.40942	1.51199	1.40275	1.39157	1.28741	1.37713	1.34852	1.52871	1.59438	1.25567
		3.16333	1.41091	1.51033	1.40279	1.39607	1.2882	1.37988	1.34793	1.5306	1.59342	1.25629
		3.16667	1.41103	1.50721	1.40247	1.39704	1.28686	1.37811	1.34607	1.53256	1.59382	1.25713
		3.17	1.41211	1.5079	1.40415	1.39802	1.28785	1.37909	1.34689	1.53264	1.59597	1.25792
		3.17333	1.41446	1.50922	1.40399	1.39879	1.28721	1.3803	1.34829	1.53133	1.59722	1.25884
		3.17667	1.41649	1.51061	1.40288	1.40083	1.28833	1.38258	1.34668	1.52891	1.59724	1.25714
		3.18	1.41727	1.51012	1.40423	1.40187	1.28727	1.38238	1.34698	1.52668	1.5988	1.25817
		3.18333	1.41863	1.51402	1.40644	1.40378	1.28842	1.38372	1.34855	1.5273	1.59875	1.25784
		3.18667	1.42014	1.51595	1.40602	1.40583	1.28812	1.38529	1.34752	1.5255	1.59737	1.25788
		3.19	1.41796	1.5162	1.40793	1.40869	1.28858	1.38576	1.34797	1.52485	1.5966	1.25889
		3.19333	1.41701	1.51911	1.40816	1.40929	1.28849	1.38349	1.35006	1.52403	1.59607	1.2603
		3.19667	1.41721	1.5201	1.40736	1.41225	1.28959	1.38289	1.35076	1.52584	1.595	1.26071
		3.2	1.41669	1.51865	1.4063	1.41351	1.29032	1.3824	1.35075	1.52452	1.59615	1.26005
		3.20333	1.41597	1.51699	1.40503	1.41149	1.29132	1.38237	1.35253	1.5257	1.59666	1.26002
		3.20667	1.416	1.51935	1.404	1.41236	1.29253	1.38396	1.35262	1.52584	1.59781	1.2589
		3.21	1.41658	1.51819	1.40531	1.4107	1.2923	1.38679	1.35136	1.52669	1.59723	1.25821
		3.21333	1.41481	1.51885	1.40665	1.40738	1.29297	1.38865	1.3506	1.52669	1.59869	1.25719
		3.21667	1.41432	1.51612	1.40682	1.40712	1.29358	1.38678	1.35145	1.52847	1.59926	1.25744
		3.22	1.41314	1.52033	1.40846	1.4096	1.29357	1.38613	1.35125	1.53005	1.60003	1.25754
		3.22333	1.41607	1.52166	1.41045	1.40951	1.29292	1.3839	1.3515	1.53091	1.60045	1.25933
		3.22667	1.41418	1.51759	1.41113	1.41085	1.29414	1.38516	1.35283	1.53368	1.6018	1.26097
		3.23	1.41419	1.51687	1.40939	1.41467	1.29431	1.38096	1.35247	1.53182	1.60044	1.26146
		3.23333	1.41408	1.52124	1.41032	1.41752	1.29357	1.38481	1.35181	1.52928	1.59928	1.26376
		3.23667	1.41467	1.51772	1.41002	1.41783	1.2941	1.38515	1.3512	1.52671	1.59928	1.26421
		3.24	1.41095	1.51321	1.4096	1.41892	1.29445	1.38676	1.35021	1.52586	1.59952	1.26318
		3.24333	1.41368	1.5173	1.40939	1.41876	1.29439	1.3854	1.3506	1.52468	1.59959	1.26213
		3.24667	1.41472	1.51765	1.41121	1.41989	1.29428	1.38923	1.3501	1.52761	1.60125	1.26376
		3.25	1.41579	1.51795	1.41209	1.41867	1.29594	1.38401	1.3521	1.53253	1.60083	1.26143
		3.25333	1.4161	1.5224	1.41273	1.42028	1.29601	1.38706	1.3526	1.53583	1.60168	1.26268
		3.25667	1.41939	1.52337	1.41155	1.42017	1.29502	1.38596	1.35273	1.53944	1.60315	1.26323
		3.26	1.41945	1.52079	1.41197	1.4238	1.29568	1.38365	1.35285	1.54003	1.60332	1.26265
		3.26333	1.42106	1.51989	1.41132	1.42291	1.29594	1.38311	1.35367	1.53874	1.60234	1.26193
		3.26667	1.42116	1.52114	1.41139	1.42545	1.29342	1.38777	1.35149	1.53575	1.60264	1.26296
		3.27	1.42125	1.5167	1.41222	1.42531	1.29507	1.38299	1.35193	1.533	1.60166	1.2617
		3.27333	1.42106	1.51789	1.41315	1.42664	1.29723	1.38231	1.35259	1.53137	1.60004	1.26188
		3.27667	1.42096	1.5203	1.41335	1.42478	1.2962	1.38604	1.35251	1.53262	1.60001	1.26369
		3.28	1.4219	1.52188	1.41459	1.42521	1.29582	1.38676	1.35304	1.53179	1.60132	1.26429
		3.28333	1.42328	1.51829	1.41472	1.42577	1.29744	1.38391	1.35505	1.53315	1.60231	1.26436
		3.28667	1.42371	1.51906	1.41271	1.42533	1.29593	1.38732	1.35523	1.53346	1.60351	1.26605
		3.29	1.42156	1.51665	1.41446	1.42457	1.2945	1.3894	1.35532	1.53296	1.6038	1.26696
		3.29333	1.42166	1.5182	1.41521	1.42803	1.29496	1.38831	1.3554	1.53178	1.60284	1.26581
		3.29667	1.41939	1.51908	1.41586	1.42801	1.29435	1.38754	1.35572	1.53392	1.60152	1.26534
		3.3	1.41807	1.52069	1.41479	1.4264	1.29571	1.38864	1.35407	1.53555	1.60227	1.26583
		3.30333	1.41867	1.52001	1.41744	1.42762	1.29506	1.3905	1.35388	1.53738	1.60161	1.26537
		3.30667	1.42356	1.52187	1.41642	1.42857	1.29794	1.38941	1.3549	1.53919	1.6015	1.26474
		3.31	1.42295	1.52057	1.41731	1.42773	1.29773	1.39123	1.35466	1.54186	1.60318	1.26563
		3.31333	1.42322	1.52069	1.41608	1.4276	1.29867	1.39255	1.35551	1.53998	1.60384	1.26628
		3.31667	1.42402	1.52225	1.41717	1.42885	1.29732	1.39464	1.35677	1.53906	1.60308	1.26659
		3.32	1.42519	1.52301	1.41616	1.43017	1.2986	1.39303	1.35668	1.53873	1.60526	1.26575
		3.32333	1.42264	1.5261	1.41734	1.43261	1.2972	1.39264	1.35571	1.53889	1.60604	1.26573
		3.32667	1.42562	1.52626	1.41669	1.43351	1.29619	1.39431	1.35553	1.53728	1.60654	1.26553
		3.33	1.42744	1.52624	1.41684	1.43505	1.29769	1.39379	1.35489	1.53774	1.60654	1.26506
		3.33333	1.42863	1.52286	1.4177	1.43574	1.297	1.39215	1.35354	1.53874	1.60671	1.2645
		3.33667	1.42639	1.52388	1.41827	1.4365	1.29738	1.39145	1.35506	1.53641	1.60571	1.26551
		3.34	1.43072	1.52281	1.41914	1.43586	1.29565	1.39614	1.35558	1.53625	1.60428	1.26626
		3.34333	1.42952	1.52578	1.41875	1.43642	1.29779	1.39211	1.3564	1.53837	1.60419	1.26737
		3.34667	1.42899	1.52094	1.41895	1.43701	1.29866	1.39358	1.35606	1.54088	1.60625	1.26821
		3.35	1.4274	1.52006	1.41832	1.43759	1.29913	1.39524	1.35672	1.54147	1.60615	1.26879
		3.35333	1.42905	1.52094	1.4175	1.43776	1.29897	1.39741	1.35592	1.54442	1.60669	1.26985
		3.35667	1.42665	1.51903	1.41655	1.43705	1.30079	1.3936	1.35521	1.54586	1.60738	1.26962
		3.36	1.42519	1.51632	1.41734	1.43811	1.30067	1.39739	1.35546	1.54556	1.60888	1.26871
		3.36333	1.42645	1.52453	1.41865	1.43816	1.30021	1.39776	1.35637	1.54723	1.60648	1.26928
		3.36667	1.42901	1.52698	1.41846	1.43823	1.30112	1.39467	1.35613	1.54585	1.6081	1.2707
		3.37	1.43046	1.52687	1.42326	1.43567	1.30084	1.39294	1.35766	1.54789	1.60845	1.26869
		3.37333	1.43021	1.53022	1.4236	1.43759	1.30091	1.39286	1.35868	1.5468	1.60901	1.26902
		3.37667	1.43299	1.53025	1.42348	1.43612	1.30215	1.39064	1.35879	1.54718	1.60853	1.2694
		3.38	1.4332	1.52372	1.42278	1.43502	1.30067	1.3891	1.35851	1.54638	1.61119	1.26788
		3.38333	1.43322	1.52283	1.42468	1.43494	1.3009	1.39526	1.35999	1.54743	1.61191	1.267
		3.38667	1.43319	1.52144	1.42088	1.43781	1.30167	1.39825	1.35877	1.54637	1.61128	1.26777
		3.39	1.43411	1.51859	1.42061	1.43738	1.30204	1.40004	1.35998	1.54887	1.61199	1.26753
		3.39333	1.4323	1.51896	1.42078	1.43934	1.29999	1.39952	1.3593	1.55101	1.60976	1.2684
		3.39667	1.43175	1.52208	1.42346	1.44183	1.30003	1.39931	1.35924	1.55085	1.60896	1.26945
		3.4	1.43189	1.52358	1.42137	1.44313	1.30082	1.39718	1.35869	1.55041	1.60835	1.27127
		3.40333	1.43051	1.52364	1.42387	1.4449	1.30165	1.39625	1.35982	1.54924	1.61009	1.27281
		3.40667	1.4294	1.5244	1.42427	1.44682	1.3025	1.39526	1.35849	1.54681	1.6093	1.27354
		3.41	1.43222	1.52585	1.42517	1.44758	1.30265	1.39719	1.35976	1.54469	1.6111	1.27298
		3.41333	1.43348	1.52796	1.42494	1.44879	1.30422	1.39852	1.36162	1.5443	1.61194	1.27258
		3.41667	1.43342	1.52831	1.42611	1.45139	1.30404	1.39858	1.36179	1.54556	1.61091	1.27224
		3.42	1.4344	1.52778	1.42331	1.45377	1.30384	1.39895	1.36094	1.54645	1.61113	1.27101
		3.42333	1.43464	1.5263	1.42294	1.45567	1.3035	1.40031	1.36	1.54778	1.61236	1.27043
		3.42667	1.43308	1.5255	1.42263	1.45849	1.30561	1.3976	1.3599	1.54891	1.61193	1.27155
		3.43	1.43151	1.52515	1.42234	1.46086	1.30483	1.39765	1.35974	1.55109	1.61194	1.27246
		3.43333	1.42994	1.52533	1.42291	1.46214	1.30586	1.40038	1.36131	1.55286	1.61287	1.27171
		3.43667	1.43264	1.52692	1.42342	1.46501	1.30654	1.40074	1.36128	1.55415	1.61205	1.27144
		3.44	1.43425	1.53055	1.42335	1.46645	1.30709	1.39911	1.36429	1.553	1.6123	1.27269
		3.44333	1.43493	1.52966	1.42363	1.4685	1.30662	1.3994	1.36422	1.55318	1.61318	1.27143
		3.44667	1.43633	1.53041	1.42492	1.47119	1.30659	1.39601	1.36253	1.55082	1.61299	1.27174
		3.45	1.43772	1.53042	1.42388	1.47447	1.30529	1.39436	1.36224	1.55039	1.61351	1.27189
		3.45333	1.43502	1.53186	1.42577	1.47533	1.30492	1.39562	1.36277	1.54956	1.61366	1.27409
		3.45667	1.436	1.5305	1.42733	1.4775	1.30621	1.39692	1.36141	1.54988	1.61414	1.27465
		3.46	1.43692	1.53343	1.42659	1.48027	1.30692	1.39998	1.36252	1.54725	1.61517	1.27569
		3.46333	1.43655	1.53272	1.4255	1.48085	1.30729	1.40569	1.36476	1.54762	1.61515	1.27609
		3.46667	1.43768	1.5328	1.42719	1.47929	1.30984	1.4039	1.36476	1.54653	1.61473	1.27694
		3.47	1.43964	1.5315	1.42679	1.47884	1.30919	1.40202	1.36506	1.54601	1.61518	1.2756
		3.47333	1.44038	1.53247	1.42735	1.479	1.30922	1.40444	1.36516	1.54533	1.61577	1.2753
		3.47667	1.44029	1.53059	1.42927	1.4763	1.30857	1.40269	1.36483	1.54678	1.61533	1.27507
		3.48	1.4401	1.52977	1.42918	1.47612	1.30813	1.40053	1.36325	1.5453	1.6155	1.27549
		3.48333	1.43975	1.53138	1.42917	1.47817	1.30701	1.4032	1.36385	1.54532	1.61717	1.27481
		3.48667	1.43937	1.53543	1.42914	1.48089	1.3071	1.40277	1.36534	1.54437	1.61625	1.27521
		3.49	1.43825	1.52961	1.42787	1.48119	1.30647	1.40026	1.36576	1.54725	1.61591	1.27372
		3.49333	1.43815	1.53173	1.42639	1.48228	1.3087	1.40168	1.3663	1.54788	1.61654	1.27516
		3.49667	1.44055	1.53441	1.42576	1.48523	1.31014	1.40444	1.36777	1.54968	1.6173	1.27462
		3.5	1.44039	1.5319	1.42523	1.4851	1.31009	1.40281	1.36714	1.54895	1.61806	1.27524
		3.50333	1.43975	1.52817	1.42733	1.48357	1.31143	1.40336	1.36656	1.5504	1.61712	1.27583
		3.50667	1.43818	1.53206	1.42789	1.48592	1.31161	1.40621	1.36681	1.54732	1.61708	1.27744
		3.51	1.43878	1.53227	1.4285	1.48798	1.31045	1.4046	1.3659	1.54826	1.61733	1.27699
		3.51333	1.43664	1.53014	1.43132	1.48551	1.31048	1.40199	1.36586	1.54768	1.6165	1.27699
		3.51667	1.4379	1.53265	1.43182	1.48641	1.31029	1.40109	1.36741	1.54848	1.61572	1.27725
		3.52	1.43763	1.53192	1.43022	1.48562	1.31055	1.40084	1.36668	1.54858	1.61654	1.27661
		3.52333	1.43808	1.53321	1.43037	1.48507	1.31066	1.39794	1.36785	1.55003	1.6167	1.27569
		3.52667	1.43933	1.53432	1.43112	1.48399	1.31013	1.39728	1.36918	1.54603	1.61674	1.27543
		3.53	1.44	1.53361	1.42918	1.48448	1.30974	1.39698	1.37065	1.54793	1.61663	1.27565
		3.53333	1.43851	1.53423	1.42979	1.4843	1.31012	1.39906	1.36896	1.54608	1.61599	1.27516
		3.53667	1.44012	1.53645	1.43072	1.48695	1.30966	1.39882	1.37093	1.54826	1.61727	1.27633
		3.54	1.44236	1.53716	1.43146	1.48902	1.30844	1.40352	1.37087	1.54922	1.61682	1.2771
		3.54333	1.44044	1.53414	1.43213	1.49057	1.30917	1.40468	1.36975	1.55293	1.61561	1.27692
		3.54667	1.44076	1.53572	1.43296	1.49196	1.31061	1.40521	1.37018	1.5527	1.61747	1.27796
		3.55	1.44151	1.53444	1.43275	1.4932	1.31126	1.40582	1.37189	1.5556	1.61783	1.27892
		3.55333	1.44283	1.53773	1.43144	1.49084	1.31256	1.40762	1.37125	1.55229	1.61879	1.27854
		3.55667	1.44218	1.54025	1.43302	1.4886	1.313	1.40603	1.36977	1.55148	1.62009	1.27944
		3.56	1.4428	1.53831	1.43302	1.48894	1.31377	1.40804	1.37027	1.55098	1.62141	1.27962
		3.56333	1.44414	1.541	1.43248	1.48739	1.31379	1.41073	1.36906	1.5514	1.6203	1.27824
		3.56667	1.44791	1.54128	1.43233	1.48561	1.31351	1.41041	1.36991	1.55099	1.62058	1.27807
		3.57	1.44752	1.53554	1.4339	1.48706	1.31234	1.40976	1.3684	1.55086	1.61995	1.27823
		3.57333	1.44841	1.53067	1.43255	1.48814	1.31442	1.40819	1.36957	1.5491	1.6196	1.27699
		3.57667	1.44804	1.53553	1.43256	1.48532	1.31451	1.40658	1.36903	1.55196	1.61978	1.27858
		3.58	1.4487	1.53113	1.43402	1.48769	1.31427	1.40641	1.37028	1.55243	1.62133	1.27938
		3.58333	1.44861	1.53002	1.43476	1.48724	1.31406	1.40547	1.36964	1.55202	1.62121	1.28111
		3.58667	1.4491	1.53175	1.43487	1.48611	1.31486	1.4038	1.3708	1.55673	1.62311	1.28038
		3.59	1.44949	1.53779	1.43644	1.48543	1.31336	1.40392	1.37081	1.5597	1.62332	1.28083
		3.59333	1.4507	1.53211	1.43662	1.48661	1.31361	1.40567	1.37297	1.55929	1.62236	1.27915
		3.59667	1.45038	1.53494	1.43682	1.48637	1.31327	1.40414	1.371	1.56004	1.62167	1.27932
		3.6	1.4497	1.54001	1.43685	1.48854	1.31339	1.40301	1.37019	1.56222	1.62265	1.27764
		3.60333	1.44894	1.54275	1.43708	1.49138	1.31228	1.40229	1.37032	1.56083	1.62254	1.27814
		3.60667	1.44862	1.53855	1.43694	1.49367	1.31383	1.40316	1.37115	1.56007	1.62239	1.27898
		3.61	1.44773	1.54276	1.43728	1.49446	1.31269	1.40387	1.37066	1.55859	1.62422	1.28061
		3.61333	1.44778	1.54297	1.4373	1.49591	1.31383	1.40626	1.37194	1.55745	1.62388	1.2805
		3.61667	1.44671	1.53821	1.43822	1.49457	1.31395	1.40974	1.37161	1.5588	1.62517	1.28121
		3.62	1.44758	1.53631	1.43885	1.4929	1.31477	1.41462	1.37254	1.55967	1.62372	1.28254
		3.62333	1.44902	1.53626	1.43769	1.49072	1.31418	1.41553	1.37168	1.56151	1.62323	1.2835
		3.62667	1.45145	1.5387	1.43709	1.49032	1.31403	1.41543	1.3713	1.56087	1.62249	1.28365
		3.63	1.45298	1.53679	1.4362	1.48966	1.31325	1.41306	1.37191	1.56147	1.62444	1.28355
		3.63333	1.45462	1.53758	1.43818	1.49091	1.31383	1.41092	1.37382	1.55889	1.62253	1.28324
		3.63667	1.45399	1.5377	1.43858	1.49172	1.3151	1.41011	1.37416	1.55926	1.62337	1.28343
		3.64	1.45246	1.53769	1.4404	1.49243	1.31497	1.40828	1.37556	1.55946	1.62437	1.28306
		3.64333	1.45171	1.5346	1.44046	1.49389	1.31506	1.40838	1.37706	1.56185	1.62396	1.28276
		3.64667	1.45094	1.53512	1.44184	1.49166	1.31578	1.41115	1.378	1.56276	1.6235	1.28383
		3.65	1.44967	1.53637	1.44053	1.49246	1.31499	1.41134	1.3777	1.56472	1.62474	1.28397
		3.65333	1.45126	1.53553	1.43804	1.49113	1.31411	1.41166	1.37798	1.56545	1.62401	1.28295
		3.65667	1.45322	1.53888	1.43731	1.49257	1.31394	1.41326	1.37775	1.56496	1.62452	1.28272
		3.66	1.45277	1.53863	1.4387	1.49287	1.31593	1.41387	1.37633	1.56524	1.62524	1.28373
		3.66333	1.45234	1.54055	1.44048	1.49429	1.31665	1.413	1.37653	1.56401	1.62469	1.28376
		3.66667	1.45338	1.53961	1.43983	1.49453	1.31816	1.41541	1.37608	1.56257	1.6233	1.28375
		3.67	1.45269	1.53937	1.44237	1.49559	1.31817	1.41604	1.3745	1.55962	1.62405	1.28673
		3.67333	1.45366	1.5366	1.44143	1.4944	1.31939	1.4173	1.37463	1.55971	1.62455	1.28566
		3.67667	1.45582	1.53866	1.44059	1.49457	1.31736	1.41746	1.37428	1.55703	1.62526	1.28427
		3.68	1.45777	1.53929	1.43825	1.49387	1.3178	1.41784	1.37313	1.55711	1.62572	1.28448
		3.68333	1.45784	1.53926	1.43975	1.49395	1.31776	1.41579	1.37402	1.55819	1.62634	1.28408
		3.68667	1.45841	1.5415	1.43919	1.49444	1.31907	1.41572	1.37689	1.55876	1.62818	1.28171
		3.69	1.45768	1.54416	1.43932	1.4963	1.31892	1.41435	1.37685	1.55847	1.62642	1.28171
		3.69333	1.45644	1.54716	1.44028	1.49652	1.3201	1.412	1.37898	1.55853	1.62532	1.28253
		3.69667	1.45565	1.54104	1.43942	1.49783	1.31869	1.41153	1.38041	1.55816	1.62529	1.28265
		3.7	1.45693	1.54415	1.43914	1.4982	1.31914	1.41313	1.38009	1.55659	1.62588	1.28266
		3.70333	1.45589	1.54284	1.44073	1.49848	1.31859	1.41104	1.37989	1.55508	1.62443	1.28327
		3.70667	1.45728	1.53968	1.44218	1.49758	1.32009	1.41343	1.38073	1.55582	1.62484	1.28449
		3.71	1.45592	1.53867	1.44223	1.49951	1.31983	1.41607	1.38007	1.55841	1.62522	1.28567
		3.71333	1.45466	1.54455	1.44509	1.50126	1.32098	1.41818	1.3789	1.55724	1.62664	1.28383
		3.71667	1.45317	1.5425	1.44548	1.50341	1.32096	1.41728	1.37868	1.556	1.62719	1.28525
		3.72	1.45483	1.54599	1.44441	1.50604	1.32045	1.42075	1.37832	1.55818	1.62718	1.28532
		3.72333	1.45271	1.54506	1.44496	1.5071	1.3185	1.41909	1.37737	1.55945	1.62925	1.28657
		3.72667	1.45532	1.54829	1.4453	1.50652	1.31934	1.41735	1.37779	1.55941	1.6294	1.28555
		3.73	1.45621	1.54555	1.445	1.50684	1.31865	1.41755	1.37822	1.56107	1.62891	1.28687
		3.73333	1.45643	1.54379	1.4457	1.50725	1.31878	1.41966	1.37899	1.56613	1.62831	1.28712
		3.73667	1.45519	1.53989	1.44809	1.50655	1.31912	1.41844	1.37768	1.56715	1.62837	1.28827
		3.74	1.45669	1.54294	1.44692	1.50764	1.32016	1.42182	1.37803	1.56567	1.62768	1.28681
		3.74333	1.45762	1.53835	1.44724	1.50814	1.32103	1.42285	1.37869	1.56512	1.62631	1.28693
		3.74667	1.4593	1.54066	1.44779	1.5097	1.32217	1.42136	1.37905	1.56686	1.62629	1.28657
		3.75	1.46137	1.54606	1.44894	1.50805	1.32218	1.42128	1.38005	1.56619	1.62653	1.28645
		3.75333	1.463	1.54749	1.44644	1.5075	1.32175	1.4215	1.38204	1.56474	1.62753	1.28553
		3.75667	1.46119	1.54717	1.44788	1.50762	1.32195	1.41831	1.38148	1.56652	1.62672	1.28578
		3.76	1.45896	1.54736	1.44894	1.50763	1.32176	1.41936	1.38145	1.56624	1.62978	1.28603
		3.76333	1.45734	1.54737	1.44715	1.50821	1.32265	1.41819	1.38087	1.56507	1.62974	1.28599
		3.76667	1.45573	1.54509	1.44576	1.50872	1.32301	1.41961	1.38098	1.56442	1.62992	1.28608
		3.77	1.45515	1.54589	1.44698	1.51173	1.32386	1.41823	1.38069	1.56366	1.62991	1.28751
		3.77333	1.4564	1.54717	1.4457	1.51132	1.32538	1.41902	1.38175	1.56229	1.63099	1.28811
		3.77667	1.45703	1.54943	1.4446	1.5136	1.32556	1.41784	1.38173	1.56271	1.63004	1.28804
		3.78	1.45677	1.54822	1.44531	1.51165	1.32452	1.41843	1.38191	1.56428	1.63172	1.2895
		3.78333	1.45727	1.54826	1.44756	1.51289	1.32451	1.41667	1.38108	1.56522	1.6317	1.28924
		3.78667	1.45678	1.54799	1.44874	1.51285	1.32383	1.41864	1.38113	1.56611	1.63147	1.28762
		3.79	1.45725	1.54661	1.45022	1.51507	1.32171	1.41763	1.38125	1.56468	1.63125	1.28725
		3.79333	1.45897	1.54547	1.45058	1.51407	1.3213	1.41987	1.38167	1.56511	1.63084	1.28821
		3.79667	1.45875	1.54704	1.45064	1.51754	1.32132	1.42092	1.38402	1.56248	1.62982	1.28858
		3.8	1.45801	1.54575	1.44848	1.52059	1.32129	1.42138	1.38472	1.56121	1.62954	1.28859
		3.80333	1.45956	1.54519	1.44776	1.52193	1.32247	1.42196	1.38379	1.56053	1.63003	1.29028
		3.80667	1.45879	1.54509	1.44762	1.52309	1.32322	1.42251	1.38384	1.5615	1.63052	1.29031
		3.81	1.45746	1.54706	1.44807	1.52568	1.32332	1.42213	1.38271	1.56173	1.63147	1.29007
		3.81333	1.45966	1.54675	1.4495	1.52604	1.32493	1.42166	1.38253	1.56341	1.63182	1.28975
		3.81667	1.46083	1.54533	1.44909	1.52539	1.32663	1.41929	1.38042	1.56392	1.63315	1.29098
		3.82	1.46042	1.54631	1.45008	1.52582	1.32608	1.41864	1.3828	1.56516	1.63341	1.29089
		3.82333	1.46099	1.55036	1.45081	1.52642	1.32685	1.42094	1.38252	1.56497	1.63397	1.29078
		3.82667	1.46248	1.55141	1.45188	1.52655	1.32722	1.42014	1.38307	1.56156	1.63449	1.29061
		3.83	1.46325	1.55279	1.45156	1.52766	1.32658	1.42161	1.38333	1.56081	1.63362	1.28905
		3.83333	1.46384	1.55883	1.45377	1.5313	1.3262	1.42475	1.38461	1.55905	1.63468	1.28953
		3.83667	1.46516	1.55784	1.45417	1.52984	1.32705	1.42804	1.38282	1.55875	1.63532	1.28889
		3.84	1.46404	1.55542	1.45371	1.53151	1.32754	1.42609	1.38239	1.55836	1.63547	1.2896
		3.84333	1.46335	1.55206	1.45273	1.5312	1.32752	1.42588	1.38461	1.55933	1.63441	1.29112
		3.84667	1.46154	1.55192	1.45378	1.52987	1.32691	1.42563	1.38224	1.55789	1.63509	1.29309
		3.85	1.45998	1.54789	1.45369	1.53003	1.32667	1.42448	1.38259	1.56053	1.6345	1.29248
		3.85333	1.45862	1.5483	1.45322	1.52942	1.3272	1.42222	1.38401	1.56132	1.63466	1.29178
		3.85667	1.46263	1.54944	1.45368	1.53125	1.32671	1.42186	1.3855	1.56184	1.63456	1.29308
		3.86	1.46385	1.54822	1.45282	1.53269	1.32736	1.42358	1.3839	1.56482	1.63595	1.29208
		3.86333	1.46523	1.54919	1.45234	1.53485	1.32808	1.42329	1.38521	1.56767	1.63658	1.29188
		3.86667	1.46899	1.55136	1.45277	1.53398	1.32847	1.42335	1.38631	1.56675	1.63688	1.29148
		3.87	1.46904	1.55274	1.45382	1.5374	1.32676	1.42254	1.3868	1.56716	1.63737	1.29274
		3.87333	1.46839	1.55205	1.45519	1.53534	1.32714	1.42558	1.38729	1.56858	1.63847	1.29143
		3.87667	1.46887	1.55304	1.45646	1.53522	1.32679	1.42577	1.38717	1.56977	1.6369	1.2911
		3.88	1.46845	1.55132	1.45642	1.535	1.32734	1.42577	1.38706	1.56843	1.63739	1.29195
		3.88333	1.46856	1.54928	1.45866	1.53312	1.32632	1.42795	1.38654	1.5708	1.63774	1.29174
		3.88667	1.46967	1.55192	1.45741	1.53058	1.32837	1.42955	1.38481	1.5707	1.63711	1.29218
		3.89	1.46963	1.55264	1.45791	1.53019	1.32916	1.42699	1.3848	1.57442	1.63623	1.29318
		3.89333	1.47068	1.5568	1.45837	1.5301	1.3288	1.42725	1.38529	1.57387	1.63746	1.29329
		3.89667	1.47215	1.55961	1.45897	1.53015	1.32805	1.42626	1.38663	1.57749	1.6367	1.29246
		3.9	1.47019	1.55662	1.45518	1.5328	1.32944	1.42368	1.38622	1.57425	1.63505	1.29362
		3.90333	1.47206	1.55456	1.45605	1.53696	1.32859	1.42377	1.38709	1.57288	1.6354	1.29351
		3.90667	1.47253	1.55353	1.45434	1.53907	1.32897	1.4266	1.38683	1.56926	1.63622	1.29391
		3.91	1.47057	1.55052	1.45583	1.53936	1.32919	1.42759	1.38661	1.56996	1.63736	1.29386
		3.91333	1.47114	1.5485	1.45504	1.53929	1.33135	1.42924	1.3853	1.57056	1.63701	1.2957
		3.91667	1.47146	1.5556	1.45729	1.53624	1.33063	1.43239	1.38654	1.57333	1.63897	1.29479
		3.92	1.46937	1.55408	1.45654	1.53251	1.33164	1.43311	1.38662	1.57734	1.63858	1.29391
		3.92333	1.46727	1.55678	1.45783	1.52912	1.32979	1.43019	1.38679	1.5767	1.63769	1.2921
		3.92667	1.4694	1.5563	1.45587	1.5263	1.33076	1.43006	1.38794	1.57599	1.63737	1.29274
		3.93	1.46844	1.55777	1.45688	1.52538	1.33039	1.42997	1.3896	1.57459	1.63808	1.29188
		3.93333	1.46828	1.55442	1.45687	1.52259	1.33063	1.42721	1.3905	1.57355	1.63733	1.29308
		3.93667	1.4705	1.55777	1.4586	1.52234	1.33194	1.42445	1.39107	1.57169	1.63853	1.29384
		3.94	1.47159	1.54983	1.45798	1.52256	1.3329	1.4259	1.39139	1.57222	1.63874	1.29552
		3.94333	1.47076	1.55488	1.45918	1.52251	1.3331	1.42332	1.39081	1.57331	1.6386	1.29592
		3.94667	1.47227	1.55087	1.45931	1.51811	1.33143	1.42376	1.38867	1.57293	1.63912	1.29644
		3.95	1.47368	1.54911	1.45799	1.51671	1.33166	1.42662	1.38886	1.57429	1.64012	1.29574
		3.95333	1.47232	1.54673	1.45648	1.51147	1.3304	1.42838	1.38883	1.57669	1.63912	1.29553
		3.95667	1.47209	1.55187	1.45758	1.5067	1.33047	1.42792	1.38857	1.57804	1.63892	1.29485
		3.96	1.47325	1.54923	1.45845	1.50167	1.33	1.43095	1.38937	1.57677	1.63953	1.29497
		3.96333	1.47211	1.55237	1.45779	1.49886	1.3313	1.42893	1.3899	1.57691	1.63912	1.29522
		3.96667	1.47181	1.55466	1.46005	1.49721	1.33103	1.42712	1.3897	1.57455	1.63808	1.29653
		3.97	1.47224	1.55405	1.46019	1.49726	1.33145	1.42807	1.38993	1.57397	1.63763	1.2959
		3.97333	1.47432	1.55559	1.45924	1.49576	1.3322	1.43142	1.39075	1.57339	1.63871	1.29586
		3.97667	1.47211	1.55101	1.45928	1.49397	1.33203	1.42987	1.39124	1.574	1.63827	1.29701
		3.98	1.47366	1.55164	1.45987	1.49092	1.33199	1.43318	1.39287	1.57287	1.63918	1.29641
		3.98333	1.47468	1.55259	1.45926	1.4897	1.33201	1.43695	1.39193	1.57544	1.64041	1.29661
		3.98667	1.47517	1.55277	1.45951	1.485	1.33275	1.43306	1.39095	1.57471	1.64142	1.29783
		3.99	1.47554	1.5531	1.45918	1.4851	1.33091	1.43094	1.39011	1.57495	1.64141	1.29845
		3.99333	1.47649	1.5555	1.45967	1.48561	1.33167	1.42984	1.38924	1.57381	1.64194	1.29718
		3.99667	1.47521	1.55458	1.46219	1.4893	1.33196	1.42949	1.38851	1.5719	1.64296	1.29793
		4	1.47494	1.55526	1.46253	1.48761	1.33251	1.429	1.38914	1.57172	1.643	1.29745
		4.00333	1.4745	1.55697	1.46291	1.48814	1.33236	1.43342	1.38931	1.57181	1.64486	1.29728
		4.00667	1.47396	1.55599	1.46273	1.48593	1.33488	1.43333	1.38932	1.57227	1.64516	1.29746
		4.01	1.47572	1.55788	1.46149	1.48761	1.33381	1.43637	1.38946	1.5706	1.64529	1.29778
		4.01333	1.4765	1.55863	1.45992	1.48428	1.33313	1.43691	1.39072	1.57192	1.64404	1.29759
		4.01667	1.47711	1.55821	1.46018	1.4868	1.33432	1.43664	1.39066	1.56868	1.6425	1.29685
		4.02	1.47912	1.55746	1.45935	1.48959	1.33587	1.4348	1.39068	1.56847	1.64186	1.29803
		4.02333	1.4773	1.55817	1.46028	1.49038	1.33505	1.43272	1.39189	1.56577	1.64058	1.29812
		4.02667	1.47789	1.5557	1.46158	1.48841	1.33666	1.43153	1.39247	1.56734	1.64092	1.29817
		4.03	1.4799	1.55688	1.46129	1.48925	1.33747	1.43197	1.39235	1.56753	1.64024	1.2976
		4.03333	1.47972	1.55744	1.46177	1.48617	1.33721	1.4328	1.39152	1.56834	1.64144	1.29913
		4.03667	1.47924	1.55972	1.46272	1.48761	1.33597	1.43234	1.39308	1.5677	1.64068	1.29887
		4.04	1.48178	1.56148	1.46315	1.48952	1.33603	1.43475	1.39259	1.56789	1.64179	1.29959
		4.04333	1.481	1.56417	1.46353	1.49083	1.33678	1.43548	1.39255	1.57115	1.6422	1.29959
		4.04667	1.47889	1.56399	1.46467	1.49268	1.33719	1.43519	1.39103	1.57169	1.64293	1.30084
		4.05	1.4795	1.56385	1.4642	1.49421	1.33581	1.43329	1.39183	1.5734	1.64395	1.30039
		4.05333	1.4787	1.56172	1.46532	1.49424	1.336	1.43301	1.39179	1.57766	1.64465	1.29971
		4.05667	1.47846	1.56178	1.46428	1.49365	1.33666	1.43397	1.39157	1.58155	1.64606	1.30107
		4.06	1.47781	1.55993	1.46432	1.49332	1.33633	1.43458	1.39201	1.57877	1.64591	1.30171
		4.06333	1.47772	1.55814	1.46394	1.4918	1.33542	1.43385	1.39406	1.579	1.64808	1.3019
		4.06667	1.47722	1.55742	1.46474	1.49319	1.33734	1.43424	1.39392	1.57744	1.64652	1.30305
		4.07	1.47626	1.55707	1.46532	1.49088	1.33818	1.43597	1.39528	1.5738	1.64717	1.30392
		4.07333	1.47809	1.55484	1.46766	1.49003	1.33825	1.43458	1.39558	1.56944	1.64679	1.30198
		4.07667	1.47915	1.55823	1.46788	1.49163	1.33674	1.43461	1.39478	1.57047	1.6465	1.30345
		4.08	1.47981	1.56268	1.46881	1.49449	1.3396	1.43323	1.39463	1.56971	1.64602	1.30407
		4.08333	1.48043	1.56557	1.46884	1.49376	1.339	1.43305	1.39488	1.57188	1.64558	1.30368
		4.08667	1.48136	1.56482	1.46958	1.49454	1.33878	1.43375	1.39399	1.57256	1.64502	1.30449
		4.09	1.47811	1.56636	1.4682	1.49539	1.33822	1.4358	1.39499	1.57331	1.64416	1.30514
		4.09333	1.47715	1.56221	1.46799	1.49374	1.33899	1.43672	1.39529	1.57301	1.64504	1.30334
		4.09667	1.47688	1.55933	1.468	1.49444	1.33705	1.43797	1.39501	1.57279	1.64375	1.30357
		4.1	1.47576	1.55786	1.46629	1.49475	1.33742	1.43813	1.39559	1.57199	1.64549	1.30371
		4.10333	1.47685	1.56082	1.46674	1.49513	1.33758	1.43735	1.39598	1.57395	1.64521	1.30222
		4.10667	1.4808	1.5609	1.46753	1.49376	1.33867	1.43606	1.39562	1.57774	1.64537	1.30275
		4.11	1.48073	1.56185	1.46808	1.49128	1.33941	1.43246	1.39642	1.579	1.64609	1.30328
		4.11333	1.48173	1.56167	1.46801	1.49052	1.339	1.43423	1.39586	1.57853	1.64585	1.30247
		4.11667	1.48342	1.56133	1.47137	1.49138	1.33707	1.43661	1.39579	1.579	1.64613	1.30216
		4.12	1.48488	1.56089	1.46936	1.49306	1.33746	1.43761	1.395	1.57558	1.64592	1.30334
		4.12333	1.48272	1.55788	1.47001	1.49565	1.33601	1.43746	1.39503	1.57156	1.64737	1.30461
		4.12667	1.48529	1.56005	1.46748	1.50036	1.33534	1.4396	1.39436	1.57276	1.6466	1.30516
		4.13	1.48638	1.55917	1.46703	1.50068	1.33676	1.43746	1.39603	1.5748	1.64663	1.3049
		4.13333	1.48807	1.56037	1.46493	1.50132	1.33928	1.43587	1.39648	1.57516	1.64683	1.30635
		4.13667	1.48695	1.56008	1.46569	1.50132	1.33826	1.4378	1.39661	1.57512	1.64753	1.30507
		4.14	1.48788	1.56302	1.4659	1.49912	1.33798	1.4397	1.39751	1.57627	1.64778	1.30502
		4.14333	1.48611	1.56176	1.46918	1.49801	1.33885	1.44088	1.3988	1.57585	1.64791	1.30401
		4.14667	1.48545	1.56402	1.4712	1.49755	1.33895	1.44017	1.39833	1.57478	1.64914	1.30337
		4.15	1.48322	1.56503	1.47325	1.49541	1.33781	1.44042	1.39837	1.57514	1.64893	1.30336
		4.15333	1.48382	1.56855	1.47352	1.49503	1.33942	1.43915	1.3987	1.5778	1.64948	1.30454
		4.15667	1.48523	1.56938	1.47579	1.49862	1.34081	1.43816	1.39886	1.58028	1.64752	1.3028
		4.16	1.48698	1.56882	1.47576	1.49893	1.34211	1.43832	1.39887	1.57873	1.64723	1.30454
		4.16333	1.48753	1.5666	1.47444	1.4982	1.34116	1.44129	1.39931	1.57874	1.64785	1.30516
		4.16667	1.48865	1.56561	1.47309	1.49945	1.34213	1.44173	1.39969	1.57699	1.64835	1.30362
		4.17	1.48844	1.56381	1.47257	1.49788	1.34156	1.44017	1.39995	1.57491	1.6484	1.30447
		4.17333	1.48735	1.56346	1.47065	1.49515	1.34213	1.44223	1.39972	1.57388	1.64955	1.30554
		4.17667	1.48581	1.56565	1.46922	1.49212	1.34209	1.44311	1.39995	1.57445	1.6502	1.3055
		4.18	1.48656	1.56775	1.46931	1.49179	1.34264	1.44336	1.39927	1.57597	1.64988	1.30626
		4.18333	1.48821	1.56947	1.46821	1.49231	1.34261	1.444	1.39885	1.57934	1.64956	1.30869
		4.18667	1.48858	1.56686	1.46873	1.49459	1.34285	1.44375	1.39798	1.57998	1.6489	1.30832
		4.19	1.48994	1.57138	1.46956	1.49493	1.34182	1.44278	1.39857	1.57912	1.65001	1.30883
		4.19333	1.49076	1.56645	1.4718	1.49876	1.34231	1.44321	1.39685	1.58025	1.64963	1.30895
		4.19667	1.48985	1.56898	1.47121	1.49873	1.34108	1.4422	1.39704	1.58273	1.65065	1.30826
		4.2	1.4874	1.56268	1.47336	1.49763	1.34121	1.44158	1.3965	1.58163	1.64931	1.30713
		4.20333	1.48764	1.56453	1.47463	1.49801	1.33988	1.44572	1.39711	1.58382	1.65125	1.30727
		4.20667	1.48469	1.5588	1.47393	1.49959	1.34063	1.44624	1.39725	1.58682	1.65086	1.30781
		4.21	1.48431	1.56248	1.47218	1.50054	1.34035	1.44558	1.39848	1.58724	1.65179	1.30733
		4.21333	1.48518	1.56019	1.47248	1.5038	1.34027	1.44552	1.39859	1.58416	1.65023	1.30794
		4.21667	1.48556	1.56386	1.47323	1.50471	1.33979	1.44369	1.39904	1.58461	1.65136	1.30755
		4.22	1.48581	1.56529	1.47226	1.50408	1.34043	1.44412	1.39985	1.58429	1.65026	1.30871
		4.22333	1.48834	1.56798	1.47225	1.50438	1.34022	1.44288	1.39856	1.58287	1.64831	1.30799
		4.22667	1.48912	1.56669	1.47327	1.5027	1.34003	1.44146	1.39804	1.5808	1.6481	1.30781
		4.23	1.48736	1.56691	1.47526	1.49822	1.34129	1.44227	1.39945	1.58346	1.64904	1.30769
		4.23333	1.48893	1.56711	1.47594	1.4997	1.34265	1.44603	1.39955	1.58617	1.64848	1.30771
		4.23667	1.4877	1.56638	1.47695	1.50071	1.34222	1.44326	1.39936	1.58426	1.64895	1.3072
		4.24	1.4867	1.56387	1.47844	1.50205	1.34431	1.44284	1.40009	1.58368	1.6504	1.30789
		4.24333	1.48856	1.56389	1.47763	1.50418	1.34309	1.44478	1.40082	1.58478	1.65004	1.30863
		4.24667	1.4921	1.56296	1.47702	1.50807	1.34424	1.4432	1.39787	1.58349	1.65011	1.31026
		4.25	1.4925	1.56531	1.47626	1.50675	1.34389	1.4419	1.39867	1.58383	1.6522	1.31208
		4.25333	1.49443	1.5652	1.47714	1.50736	1.3464	1.44751	1.39883	1.58672	1.65155	1.31238
		4.25667	1.49594	1.56894	1.47598	1.50702	1.34538	1.44888	1.39868	1.58951	1.65216	1.31398
		4.26	1.4944	1.57034	1.47717	1.50671	1.34707	1.44883	1.39851	1.58802	1.65256	1.31298
		4.26333	1.4908	1.57025	1.47819	1.50339	1.34471	1.45132	1.40187	1.58973	1.65226	1.31177
		4.26667	1.49025	1.56843	1.47668	1.50552	1.34532	1.45017	1.401	1.58602	1.65193	1.3118
		4.27	1.48789	1.56832	1.47648	1.50596	1.34373	1.44749	1.40174	1.58603	1.65361	1.31237
		4.27333	1.48706	1.56733	1.4785	1.50276	1.34436	1.44805	1.40315	1.58401	1.65364	1.30977
		4.27667	1.48873	1.57012	1.48113	1.50132	1.34329	1.44746	1.40386	1.58522	1.65326	1.30972
		4.28	1.48981	1.57045	1.47985	1.50243	1.34566	1.44875	1.40281	1.58649	1.65402	1.31008
		4.28333	1.49006	1.57238	1.48197	1.50128	1.34442	1.44842	1.4042	1.58552	1.65212	1.30878
		4.28667	1.49127	1.57164	1.48061	1.4996	1.34519	1.44463	1.40303	1.58581	1.65115	1.30721
		4.29	1.4907	1.57054	1.47887	1.50136	1.34543	1.44343	1.40262	1.58606	1.65214	1.30837
		4.29333	1.48942	1.56838	1.47683	1.50252	1.34585	1.44759	1.40198	1.58749	1.65298	1.30948
		4.29667	1.49081	1.56708	1.47669	1.50549	1.34596	1.44748	1.40209	1.58521	1.65316	1.31014
		4.3	1.49246	1.56533	1.47772	1.5048	1.34759	1.44951	1.40371	1.58591	1.65451	1.31121
		4.30333	1.49442	1.56701	1.47887	1.50544	1.34692	1.4505	1.40428	1.58471	1.65476	1.31163
		4.30667	1.49727	1.56771	1.47915	1.50444	1.34654	1.45074	1.40351	1.58635	1.65355	1.31278
		4.31	1.49784	1.56899	1.47939	1.50609	1.34652	1.44782	1.40448	1.58619	1.65481	1.31351
		4.31333	1.49946	1.57123	1.48088	1.50399	1.34603	1.44439	1.40361	1.58866	1.65418	1.31334
		4.31667	1.49825	1.57118	1.48059	1.50431	1.3443	1.4428	1.40284	1.59107	1.65342	1.31329
		4.32	1.49938	1.57195	1.48156	1.50594	1.34551	1.44301	1.40369	1.5928	1.65333	1.31375
		4.32333	1.49855	1.57112	1.4825	1.50699	1.34542	1.44434	1.40432	1.59378	1.6546	1.31215
		4.32667	1.49822	1.56948	1.48203	1.50461	1.34592	1.44345	1.40418	1.59415	1.65428	1.31169
		4.33	1.49542	1.57086	1.48185	1.5032	1.34707	1.44354	1.4061	1.59204	1.65494	1.31164
		4.33333	1.49527	1.57026	1.4809	1.50237	1.34811	1.44599	1.40606	1.58977	1.6561	1.31106
		4.33667	1.49344	1.57191	1.48197	1.49996	1.34805	1.44986	1.40618	1.59146	1.65587	1.3115
		4.34	1.49539	1.572	1.48068	1.49723	1.34878	1.44836	1.40643	1.59081	1.6553	1.31246
		4.34333	1.49511	1.57441	1.48182	1.49855	1.34794	1.44983	1.40638	1.5882	1.6557	1.31157
		4.34667	1.49852	1.57273	1.48177	1.49995	1.34742	1.453	1.40455	1.58775	1.6568	1.31199
		4.35	1.49961	1.57362	1.484	1.50154	1.34764	1.45278	1.40634	1.58842	1.65692	1.31256
		4.35333	1.50012	1.57271	1.48353	1.50254	1.34708	1.45066	1.40542	1.58564	1.65666	1.31227
		4.35667	1.49666	1.57282	1.48626	1.50432	1.34723	1.45271	1.40497	1.58477	1.65821	1.31166
		4.36	1.49833	1.57354	1.48575	1.50532	1.34953	1.45163	1.40569	1.5874	1.65778	1.31258
		4.36333	1.49807	1.57655	1.48461	1.50547	1.34921	1.45286	1.40772	1.58775	1.65677	1.31136
		4.36667	1.49809	1.5757	1.48466	1.50575	1.34994	1.45254	1.40613	1.58875	1.65731	1.31089
		4.37	1.49819	1.57349	1.48626	1.50672	1.35038	1.45205	1.40673	1.58803	1.6589	1.31143
		4.37333	1.50095	1.57269	1.48474	1.5074	1.35089	1.45304	1.40667	1.58661	1.65844	1.31266
		4.37667	1.49876	1.56983	1.48364	1.50798	1.35041	1.45596	1.40675	1.58665	1.66009	1.31332
		4.38	1.50206	1.56861	1.48608	1.5099	1.34983	1.45477	1.40676	1.5887	1.65893	1.31483
		4.38333	1.50096	1.5703	1.4861	1.51083	1.34933	1.45366	1.40542	1.58774	1.65947	1.31475
		4.38667	1.50082	1.56942	1.48361	1.51154	1.34946	1.4559	1.40493	1.58872	1.65945	1.31589
		4.39	1.50257	1.56893	1.48464	1.51308	1.34872	1.45491	1.40672	1.59157	1.65969	1.3155
		4.39333	1.50389	1.57017	1.48405	1.5127	1.34865	1.45254	1.40685	1.59083	1.65789	1.31623
		4.39667	1.5017	1.56998	1.4828	1.50805	1.34969	1.45307	1.406	1.58933	1.65961	1.31675
		4.4	1.50333	1.5701	1.48188	1.50649	1.35052	1.45461	1.40678	1.58845	1.65971	1.31842
		4.40333	1.50489	1.57552	1.48311	1.50612	1.35062	1.4513	1.40725	1.58851	1.66012	1.31703
		4.40667	1.50375	1.57998	1.48369	1.50571	1.35051	1.45037	1.40601	1.58461	1.65829	1.31598
		4.41	1.5053	1.58164	1.48543	1.50534	1.35072	1.4487	1.40612	1.58275	1.65907	1.31518
		4.41333	1.50502	1.58114	1.48711	1.50996	1.34899	1.44894	1.40689	1.58219	1.65928	1.31384
		4.41667	1.50503	1.58277	1.48694	1.51084	1.34929	1.44808	1.40831	1.58471	1.65922	1.31332
		4.42	1.50549	1.57961	1.4882	1.50794	1.34884	1.45043	1.40908	1.58563	1.65874	1.31389
		4.42333	1.5049	1.57699	1.48841	1.5093	1.34918	1.45006	1.40919	1.58614	1.66042	1.31564
		4.42667	1.50424	1.57601	1.49091	1.50954	1.34991	1.45354	1.40872	1.5879	1.66017	1.31507
		4.43	1.50249	1.57494	1.49066	1.50892	1.35071	1.45108	1.40735	1.58886	1.65997	1.31639
		4.43333	1.50197	1.57183	1.49201	1.50938	1.34992	1.45053	1.40658	1.5882	1.65952	1.31717
		4.43667	1.50093	1.57413	1.49076	1.51322	1.35114	1.45	1.40639	1.58757	1.65991	1.31602
		4.44	1.50079	1.57485	1.48841	1.51281	1.35235	1.45188	1.40651	1.59038	1.66035	1.31615
		4.44333	1.50205	1.57492	1.48602	1.51353	1.35183	1.44981	1.40741	1.59312	1.66092	1.31753
		4.44667	1.5032	1.57928	1.48518	1.51246	1.35379	1.45071	1.40976	1.59476	1.66035	1.31717
		4.45	1.50293	1.57973	1.48368	1.51229	1.35516	1.45232	1.41117	1.59574	1.66174	1.31705
		4.45333	1.50348	1.57633	1.48463	1.50834	1.35445	1.45277	1.41181	1.5931	1.66062	1.31825
		4.45667	1.50298	1.57652	1.48676	1.51	1.35298	1.45321	1.41301	1.59579	1.66031	1.31635
		4.46	1.50149	1.5739	1.48719	1.509	1.3525	1.45596	1.41157	1.59461	1.6596	1.31713
		4.46333	1.50088	1.57148	1.48897	1.5107	1.35166	1.45853	1.41014	1.59142	1.65996	1.31754
		4.46667	1.50385	1.57409	1.48838	1.50996	1.35161	1.45888	1.41063	1.59095	1.65915	1.31785
		4.47	1.50227	1.57882	1.4874	1.51342	1.352	1.45656	1.41106	1.59205	1.66101	1.31751
		4.47333	1.50352	1.57614	1.48701	1.51107	1.35345	1.45799	1.41043	1.585	1.65947	1.31893
		4.47667	1.5038	1.57969	1.48651	1.51018	1.35478	1.45589	1.4127	1.58506	1.65979	1.31719
		4.48	1.50498	1.57814	1.48584	1.50993	1.35462	1.45668	1.41259	1.58563	1.66077	1.31752
		4.48333	1.50247	1.57681	1.48732	1.51157	1.35544	1.45735	1.4116	1.58553	1.6612	1.31759
		4.48667	1.50465	1.57039	1.48875	1.51286	1.35635	1.45901	1.41221	1.58736	1.66069	1.31746
		4.49	1.50407	1.57291	1.48955	1.51183	1.35671	1.45554	1.41179	1.59193	1.663	1.31772
		4.49333	1.50475	1.57139	1.49225	1.51489	1.35732	1.45686	1.41143	1.58952	1.6628	1.32066
		4.49667	1.50361	1.57222	1.49208	1.51447	1.35628	1.45253	1.41344	1.59213	1.66315	1.32075
		4.5	1.50557	1.5717	1.49179	1.51281	1.35512	1.44993	1.41232	1.59053	1.66224	1.31985
		4.50333	1.50616	1.57667	1.48964	1.50891	1.3549	1.45144	1.41232	1.58833	1.66112	1.32021
		4.50667	1.50654	1.57864	1.48874	1.51157	1.35479	1.45193	1.41317	1.58761	1.66133	1.32127
		4.51	1.5074	1.58367	1.48814	1.51136	1.35394	1.4516	1.41232	1.58779	1.66128	1.31795
		4.51333	1.50869	1.58368	1.49004	1.51322	1.35632	1.45444	1.40992	1.58645	1.6617	1.31786
		4.51667	1.50857	1.58294	1.49167	1.51309	1.35639	1.45817	1.41125	1.58959	1.6621	1.3185
		4.52	1.50943	1.58422	1.4939	1.51577	1.3579	1.45935	1.40987	1.59058	1.66208	1.3196
		4.52333	1.51038	1.583	1.49575	1.51443	1.35708	1.46208	1.41132	1.58996	1.66119	1.31886
		4.52667	1.50966	1.57847	1.49647	1.51221	1.35718	1.46256	1.41147	1.5935	1.66234	1.3204
		4.53	1.51281	1.57883	1.49487	1.51323	1.35619	1.46487	1.41224	1.59292	1.66086	1.32113
		4.53333	1.51203	1.57995	1.49376	1.51443	1.35529	1.46298	1.41195	1.59075	1.66171	1.32226
		4.53667	1.50903	1.57712	1.49214	1.51422	1.35305	1.45813	1.41344	1.59165	1.66313	1.32106
		4.54	1.51116	1.57818	1.49124	1.51361	1.35368	1.45766	1.41224	1.59319	1.66302	1.32202
		4.54333	1.51041	1.58171	1.48936	1.51421	1.35302	1.4548	1.41294	1.59324	1.66226	1.32235
		4.54667	1.50761	1.57675	1.48799	1.51101	1.35408	1.45059	1.41371	1.59401	1.66309	1.32201
		4.55	1.50795	1.57694	1.48828	1.51017	1.35612	1.45097	1.41223	1.59669	1.66316	1.32185
		4.55333	1.51097	1.58048	1.49001	1.50942	1.35771	1.45314	1.4111	1.59826	1.6644	1.32235
		4.55667	1.50733	1.58007	1.49207	1.50911	1.35785	1.45362	1.41102	1.59921	1.66495	1.32014
		4.56	1.50846	1.57676	1.49395	1.51109	1.3579	1.45727	1.41282	1.60063	1.66537	1.32007
		4.56333	1.50762	1.58146	1.49581	1.51589	1.35763	1.45991	1.41276	1.60181	1.66469	1.31939
		4.56667	1.50835	1.58233	1.49579	1.51664	1.3574	1.46155	1.41495	1.59835	1.66476	1.31747
		4.57	1.50805	1.57922	1.49824	1.51691	1.35756	1.46366	1.41552	1.59787	1.66441	1.3192
		4.57333	1.5092	1.57641	1.49695	1.51898	1.35752	1.46	1.41519	1.59661	1.66462	1.31993
		4.57667	1.5108	1.57639	1.49572	1.51793	1.35844	1.45597	1.41256	1.59274	1.66396	1.31947
		4.58	1.51239	1.57805	1.49565	1.51538	1.35683	1.45349	1.4114	1.59087	1.66482	1.31966
		4.58333	1.5134	1.57945	1.49628	1.51595	1.35602	1.45156	1.41207	1.59147	1.6634	1.32219
		4.58667	1.51368	1.581	1.49293	1.51802	1.35536	1.45058	1.41084	1.58983	1.66249	1.3203
		4.59	1.51485	1.58383	1.49222	1.51859	1.3545	1.45166	1.41111	1.59174	1.66133	1.32191
		4.59333	1.51473	1.58289	1.49281	1.52001	1.35434	1.45474	1.41264	1.59351	1.66158	1.32256
		4.59667	1.51583	1.58348	1.492	1.51835	1.3569	1.45743	1.41471	1.59528	1.66237	1.32239
		4.6	1.51615	1.58296	1.49303	1.5163	1.35715	1.45861	1.41344	1.5957	1.66377	1.32164
		4.60333	1.51458	1.58177	1.49546	1.51579	1.35875	1.45871	1.41374	1.59841	1.66478	1.32332
		4.60667	1.51494	1.57986	1.49703	1.51291	1.36097	1.4621	1.41455	1.59811	1.66577	1.32295
		4.61	1.51486	1.58356	1.49849	1.51135	1.35982	1.46372	1.41384	1.59921	1.66616	1.32269
		4.61333	1.51277	1.58201	1.50122	1.51342	1.35961	1.46363	1.41441	1.5982	1.66474	1.32407
		4.61667	1.51098	1.5827	1.50063	1.51366	1.35909	1.46309	1.41338	1.59879	1.66482	1.32492
		4.62	1.51406	1.58537	1.49951	1.51329	1.3577	1.46444	1.41498	1.59968	1.66549	1.32556
		4.62333	1.51469	1.58598	1.49884	1.51697	1.35772	1.46159	1.41449	1.59899	1.6659	1.32601
		4.62667	1.51436	1.5851	1.49688	1.51982	1.35831	1.45814	1.41515	1.59767	1.66589	1.32617
		4.63	1.51595	1.58772	1.49566	1.52083	1.35947	1.45686	1.41537	1.59626	1.66793	1.32543
		4.63333	1.51924	1.58349	1.49748	1.52255	1.35974	1.4566	1.41753	1.59591	1.66853	1.32494
		4.63667	1.51697	1.57957	1.49776	1.52248	1.36027	1.45642	1.41708	1.59467	1.66749	1.32388
		4.64	1.51702	1.58139	1.49851	1.52156	1.35941	1.45827	1.41866	1.59585	1.66741	1.3233
		4.64333	1.51834	1.58189	1.50038	1.51969	1.36033	1.45944	1.41811	1.59614	1.66804	1.32402
		4.64667	1.51979	1.57803	1.50205	1.51815	1.35927	1.46187	1.41738	1.59814	1.66629	1.32504
		4.65	1.51787	1.58146	1.5002	1.51778	1.35997	1.46484	1.4175	1.59835	1.66559	1.32384
		4.65333	1.51873	1.58158	1.49993	1.5162	1.36019	1.46495	1.41678	1.60092	1.66577	1.32538
		4.65667	1.51682	1.58174	1.49971	1.51881	1.35921	1.46536	1.41557	1.59821	1.66682	1.32577
		4.66	1.51651	1.57972	1.50279	1.51887	1.35972	1.46867	1.41726	1.59679	1.66633	1.32611
		4.66333	1.51557	1.5835	1.50266	1.5206	1.35984	1.47014	1.41671	1.59705	1.66777	1.3258
		4.66667	1.51517	1.58379	1.50238	1.51962	1.35807	1.46818	1.41607	1.59508	1.66848	1.3266
		4.67	1.51753	1.58724	1.5045	1.52077	1.35787	1.46635	1.41746	1.59161	1.66763	1.32545
		4.67333	1.51843	1.586	1.50455	1.51778	1.35961	1.46615	1.41795	1.59132	1.66689	1.32588
		4.67667	1.51768	1.58671	1.50249	1.51806	1.36101	1.46485	1.41748	1.59413	1.66847	1.32607
		4.68	1.51845	1.5832	1.50181	1.5182	1.36047	1.46233	1.41853	1.5922	1.66685	1.32557
		4.68333	1.51969	1.58168	1.50382	1.52186	1.36175	1.46097	1.41937	1.59245	1.66706	1.32608
		4.68667	1.51964	1.57871	1.50311	1.52245	1.36278	1.46174	1.41931	1.59279	1.66734	1.32689
		4.69	1.51806	1.57734	1.5025	1.52263	1.36344	1.46112	1.4196	1.59393	1.66824	1.32664
		4.69333	1.51895	1.5775	1.50191	1.52083	1.36236	1.46027	1.41851	1.59167	1.66718	1.32687
		4.69667	1.51893	1.57827	1.50178	1.5175	1.36188	1.46071	1.4182	1.59471	1.66792	1.32799
		4.7	1.51907	1.57933	1.50095	1.51764	1.36131	1.46237	1.41828	1.59796	1.6678	1.3285
		4.70333	1.51881	1.57994	1.50165	1.51896	1.36026	1.46436	1.41829	1.5985	1.66914	1.32944
		4.70667	1.52214	1.58307	1.50299	1.51977	1.35829	1.46639	1.41832	1.60104	1.66956	1.33054
		4.71	1.52118	1.58306	1.50355	1.52249	1.35921	1.46635	1.41924	1.60056	1.66965	1.3299
		4.71333	1.52008	1.58423	1.50481	1.52585	1.36072	1.46714	1.41841	1.6	1.67113	1.32845
		4.71667	1.52031	1.58398	1.50535	1.52582	1.36186	1.46908	1.41765	1.60067	1.67083	1.32759
		4.72	1.52013	1.58712	1.50624	1.52672	1.36325	1.47034	1.41814	1.59887	1.66928	1.32665
		4.72333	1.51732	1.5846	1.50597	1.52535	1.36511	1.46964	1.41859	1.59537	1.66816	1.32742
		4.72667	1.51958	1.58567	1.50655	1.52505	1.36489	1.4722	1.41849	1.59684	1.66844	1.32748
		4.73	1.51976	1.58542	1.50712	1.52428	1.36406	1.47311	1.42005	1.59424	1.6685	1.32784
		4.73333	1.51989	1.58474	1.50766	1.52027	1.36413	1.47268	1.42014	1.59438	1.66999	1.32844
		4.73667	1.52016	1.58426	1.50597	1.51955	1.36378	1.46984	1.41889	1.59561	1.6703	1.32984
		4.74	1.5218	1.5862	1.50617	1.52135	1.36396	1.47017	1.41638	1.59705	1.6709	1.32916
		4.74333	1.52386	1.58572	1.50307	1.52069	1.36348	1.46703	1.41568	1.59767	1.67083	1.32876
		4.74667	1.52299	1.58604	1.50026	1.52093	1.36411	1.4647	1.41618	1.60115	1.67111	1.32915
		4.75	1.52373	1.58689	1.49928	1.52704	1.36378	1.46261	1.41812	1.60077	1.6708	1.32851
		4.75333	1.52368	1.58587	1.499	1.52678	1.3645	1.46365	1.41843	1.60138	1.67153	1.32816
		4.75667	1.5251	1.58711	1.49993	1.52792	1.36262	1.46351	1.42194	1.60203	1.6725	1.32664
		4.76	1.52383	1.59121	1.50142	1.52891	1.36299	1.46522	1.42125	1.60309	1.67181	1.32801
		4.76333	1.52645	1.5948	1.50313	1.52888	1.36256	1.46846	1.42183	1.60264	1.67046	1.32951
		4.76667	1.52541	1.59531	1.50405	1.52645	1.36384	1.46958	1.41954	1.60248	1.67037	1.33108
		4.77	1.52539	1.59506	1.50486	1.52543	1.36289	1.47064	1.42032	1.60434	1.66968	1.33045
		4.77333	1.52427	1.59235	1.50418	1.52408	1.36435	1.46827	1.4186	1.6036	1.66985	1.33165
		4.77667	1.52443	1.58882	1.50782	1.52155	1.36407	1.46712	1.42159	1.60439	1.66991	1.33194
		4.78	1.52386	1.5864	1.50678	1.52329	1.36511	1.46453	1.42012	1.60491	1.67008	1.331
		4.78333	1.52398	1.58582	1.50545	1.52392	1.36406	1.46382	1.42172	1.60425	1.66945	1.33063
		4.78667	1.52483	1.58387	1.50527	1.52357	1.36462	1.4627	1.42277	1.60284	1.67187	1.32986
		4.79	1.52653	1.58608	1.5057	1.52351	1.36507	1.46553	1.4242	1.60461	1.67007	1.33015
		4.79333	1.52583	1.59157	1.50273	1.52536	1.36576	1.46751	1.4234	1.60436	1.67095	1.32966
		4.79667	1.52619	1.5924	1.50421	1.52424	1.36496	1.46947	1.42334	1.60274	1.67088	1.33025
		4.8	1.52752	1.59274	1.5044	1.5234	1.36483	1.47053	1.42215	1.60368	1.6718	1.33021
		4.80333	1.52709	1.59672	1.50633	1.52433	1.36476	1.47246	1.42222	1.60766	1.67099	1.33058
		4.80667	1.52684	1.59826	1.505	1.52545	1.36416	1.47305	1.42076	1.60813	1.6723	1.33033
		4.81	1.52703	1.59125	1.50569	1.52599	1.36352	1.47208	1.42039	1.6069	1.67346	1.32956
		4.81333	1.5272	1.59006	1.50529	1.52632	1.36498	1.47026	1.41964	1.60883	1.67314	1.33011
		4.81667	1.52671	1.58883	1.50639	1.52614	1.3653	1.46955	1.42066	1.61068	1.67394	1.32867
		4.82	1.52609	1.58925	1.50555	1.52544	1.36647	1.46999	1.42022	1.60889	1.67452	1.33037
		4.82333	1.52539	1.58649	1.5063	1.52717	1.36629	1.47027	1.41995	1.60901	1.67461	1.33147
		4.82667	1.52482	1.58671	1.50664	1.52771	1.36648	1.46835	1.42026	1.61059	1.67463	1.33168
		4.83	1.52441	1.58773	1.50855	1.52686	1.36596	1.46905	1.42238	1.61137	1.67748	1.33179
		4.83333	1.5259	1.5901	1.51004	1.52882	1.36636	1.47026	1.4211	1.61011	1.67667	1.33224
		4.83667	1.52638	1.58497	1.51063	1.53114	1.36549	1.47108	1.42046	1.60945	1.67647	1.33255
		4.84	1.52787	1.58696	1.51315	1.52964	1.36487	1.46905	1.42235	1.60821	1.67617	1.33293
		4.84333	1.52934	1.58966	1.51416	1.53029	1.36505	1.47068	1.42296	1.60866	1.67573	1.33383
		4.84667	1.53072	1.59011	1.51552	1.53011	1.3645	1.47037	1.42241	1.60762	1.67471	1.33393
		4.85	1.53013	1.58943	1.51478	1.52585	1.36469	1.46914	1.4239	1.60744	1.67419	1.3339
		4.85333	1.53111	1.59384	1.51405	1.52468	1.36458	1.46681	1.4243	1.60677	1.67435	1.3318
		4.85667	1.53022	1.59322	1.51276	1.52337	1.36624	1.4681	1.42453	1.60856	1.67546	1.33181
		4.86	1.52963	1.59067	1.51322	1.52276	1.36604	1.46711	1.42284	1.60693	1.67589	1.33257
		4.86333	1.52897	1.5922	1.5109	1.52157	1.36647	1.46653	1.42163	1.60583	1.67669	1.33189
		4.86667	1.52745	1.59221	1.50969	1.52539	1.3674	1.4657	1.42119	1.60854	1.67649	1.33347
		4.87	1.52848	1.58974	1.51109	1.52678	1.36634	1.46561	1.42182	1.60807	1.67612	1.335
		4.87333	1.52886	1.58915	1.51173	1.52799	1.36695	1.46471	1.4205	1.60835	1.6759	1.33286
		4.87667	1.52856	1.5908	1.50967	1.52822	1.36733	1.46576	1.42282	1.60964	1.6761	1.33239
		4.88	1.53075	1.58673	1.50893	1.53222	1.36806	1.4667	1.42449	1.61273	1.67524	1.33298
		4.88333	1.52964	1.58898	1.5108	1.53192	1.36815	1.46912	1.42508	1.61044	1.67705	1.33411
		4.88667	1.52717	1.58964	1.50903	1.5323	1.3702	1.47016	1.42406	1.61201	1.67666	1.33426
		4.89	1.52696	1.58894	1.50896	1.5322	1.36833	1.47298	1.42528	1.61141	1.67583	1.33624
		4.89333	1.52859	1.58698	1.50977	1.52994	1.36839	1.47416	1.42491	1.61299	1.67639	1.33651
		4.89667	1.52642	1.58957	1.51154	1.52892	1.36976	1.47525	1.42288	1.61232	1.67587	1.33618
		4.9	1.52879	1.58917	1.51155	1.52994	1.36882	1.47537	1.42278	1.61108	1.67494	1.33571
		4.90333	1.53021	1.59025	1.51337	1.52928	1.3668	1.47485	1.42299	1.61317	1.67683	1.33599
		4.90667	1.52977	1.59146	1.51377	1.52652	1.36904	1.4741	1.42219	1.61347	1.67776	1.33502
		4.91	1.52857	1.59586	1.51571	1.52673	1.36812	1.47486	1.42234	1.60885	1.67707	1.33531
		4.91333	1.52928	1.59371	1.51582	1.52736	1.36687	1.47355	1.42487	1.60562	1.6779	1.33456
		4.91667	1.52964	1.59209	1.51683	1.52726	1.36675	1.47434	1.42431	1.60568	1.67825	1.33419
		4.92	1.53153	1.59289	1.51645	1.52789	1.36873	1.47569	1.42628	1.59901	1.67744	1.33268
		4.92333	1.53314	1.59693	1.5169	1.53066	1.36837	1.47589	1.42799	1.5977	1.67825	1.33379
		4.92667	1.53351	1.5957	1.51351	1.5324	1.36954	1.47579	1.4277	1.59953	1.67801	1.3333
		4.93	1.53375	1.59549	1.51242	1.5321	1.36916	1.47423	1.42862	1.60216	1.67906	1.3351
		4.93333	1.53295	1.59314	1.51112	1.52959	1.37032	1.47135	1.42928	1.6034	1.68049	1.33512
		4.93667	1.53049	1.5952	1.50901	1.5291	1.37079	1.46982	1.429	1.60682	1.67996	1.33658
		4.94	1.53056	1.59091	1.50834	1.52966	1.37119	1.46893	1.42787	1.60786	1.67916	1.33685
		4.94333	1.53015	1.59271	1.50978	1.53019	1.37039	1.46522	1.42809	1.61129	1.67886	1.3361
		4.94667	1.52957	1.59395	1.51057	1.53011	1.37079	1.467	1.4277	1.61127	1.67751	1.33521
		4.95	1.5301	1.59683	1.51166	1.52965	1.37191	1.46816	1.42774	1.60924	1.67641	1.33531
		4.95333	1.53172	1.59031	1.51513	1.53232	1.37059	1.46944	1.42738	1.60988	1.67717	1.33489
		4.95667	1.53183	1.59317	1.51595	1.53333	1.36991	1.46797	1.42807	1.608	1.67736	1.33618
		4.96	1.53129	1.59072	1.51707	1.53198	1.37126	1.47227	1.42793	1.60387	1.67941	1.33755
		4.96333	1.53165	1.58871	1.51828	1.5303	1.37161	1.47437	1.42526	1.6038	1.68125	1.33741
		4.96667	1.53299	1.58865	1.51876	1.53157	1.37099	1.4763	1.42533	1.60368	1.68048	1.33779
		4.97	1.5336	1.59298	1.51771	1.52997	1.37053	1.47588	1.42649	1.60203	1.68021	1.33836
		4.97333	1.53441	1.59012	1.51789	1.52926	1.37	1.47952	1.42617	1.60329	1.68082	1.33799
		4.97667	1.53584	1.59143	1.51952	1.53174	1.36933	1.47914	1.42658	1.60314	1.67879	1.33763
		4.98	1.53674	1.59348	1.51889	1.53362	1.36911	1.47603	1.42783	1.60284	1.678	1.3382
		4.98333	1.53571	1.59501	1.51769	1.5349	1.36854	1.47284	1.42964	1.60384	1.67931	1.33735
		4.98667	1.53444	1.59715	1.51905	1.53415	1.36932	1.4722	1.43012	1.60641	1.67977	1.33661
		4.99	1.53306	1.59722	1.51848	1.53352	1.37046	1.46837	1.42995	1.60713	1.67948	1.33515
		4.99333	1.53331	1.59658	1.51816	1.53093	1.37147	1.46679	1.42902	1.6086	1.68122	1.33589
		4.99667	1.53312	1.59837	1.51849	1.53128	1.37194	1.46942	1.43009	1.60974	1.68099	1.33658
		5	1.534	1.59682	1.51805	1.53259	1.37049	1.47189	1.42894	1.6114	1.68052	1.33806
		5.00333	1.53517	1.59353	1.51724	1.53101	1.37191	1.47257	1.42753	1.61083	1.68035	1.33972
		5.00667	1.53708	1.59589	1.51748	1.53055	1.37075	1.47395	1.42747	1.61108	1.68049	1.33996
		5.01	1.53772	1.59592	1.51592	1.53238	1.37019	1.47718	1.42905	1.61063	1.67949	1.33871
		5.01333	1.53644	1.59637	1.51634	1.53404	1.37026	1.47652	1.42912	1.60891	1.6784	1.33885
		5.01667	1.53725	1.59683	1.51852	1.53459	1.37263	1.47529	1.43081	1.61027	1.67794	1.33878
		5.02	1.53735	1.59965	1.51948	1.53568	1.37229	1.47519	1.43048	1.60845	1.67654	1.33776
		5.02333	1.53932	1.5994	1.51939	1.53678	1.37324	1.47554	1.43081	1.60793	1.67651	1.33743
		5.02667	1.53767	1.59934	1.52101	1.53587	1.37319	1.47627	1.43038	1.60814	1.67742	1.33877
		5.03	1.539	1.59778	1.52089	1.53413	1.37357	1.47697	1.43074	1.61028	1.67884	1.33933
		5.03333	1.53842	1.59767	1.52008	1.53245	1.37282	1.48054	1.42953	1.60801	1.6785	1.33854
		5.03667	1.53954	1.59524	1.52144	1.533	1.37299	1.48179	1.43079	1.61187	1.68117	1.34007
		5.04	1.5372	1.59558	1.52232	1.53264	1.37241	1.48239	1.43163	1.61137	1.68148	1.34154
		5.04333	1.53724	1.59459	1.52147	1.53476	1.37302	1.47923	1.43204	1.6098	1.68189	1.34156
		5.04667	1.53777	1.59475	1.52239	1.53281	1.37236	1.47948	1.43164	1.6076	1.68257	1.34108
		5.05	1.53855	1.59472	1.52167	1.53251	1.37087	1.47688	1.43054	1.60723	1.68385	1.34197
		5.05333	1.53716	1.59672	1.52154	1.53268	1.37077	1.47551	1.4309	1.60818	1.68285	1.34163
		5.05667	1.53822	1.59638	1.52235	1.53495	1.37179	1.47664	1.43052	1.60809	1.68214	1.34105
		5.06	1.53995	1.59634	1.52155	1.5327	1.37145	1.47559	1.42982	1.61134	1.68301	1.3411
		5.06333	1.54008	1.59826	1.5205	1.5347	1.371	1.47473	1.42904	1.61383	1.68268	1.34179
		5.06667	1.53849	1.60185	1.52122	1.53619	1.37337	1.47654	1.42994	1.61743	1.68059	1.34177
		5.07	1.53959	1.60362	1.51938	1.53612	1.37344	1.47983	1.42947	1.61706	1.68152	1.34202
		5.07333	1.53891	1.60379	1.5188	1.53529	1.3733	1.4772	1.42966	1.61912	1.68141	1.34255
		5.07667	1.54035	1.60578	1.52066	1.53501	1.37436	1.47754	1.43043	1.6196	1.68003	1.3429
		5.08	1.54107	1.60492	1.52137	1.53579	1.37632	1.47824	1.43069	1.61894	1.67993	1.34228
		5.08333	1.54249	1.60513	1.52241	1.53519	1.37511	1.4784	1.42974	1.61547	1.6826	1.34313
		5.08667	1.5433	1.59993	1.52286	1.53607	1.37523	1.47666	1.42966	1.61291	1.68182	1.34173
		5.09	1.54176	1.60072	1.52253	1.53813	1.37553	1.47985	1.42898	1.61295	1.68441	1.34208
		5.09333	1.54181	1.59882	1.52197	1.54033	1.37535	1.48256	1.42738	1.61157	1.68453	1.34261
		5.09667	1.54422	1.60122	1.52372	1.54156	1.3756	1.48174	1.42775	1.60953	1.68412	1.34209
		5.1	1.54631	1.59759	1.52326	1.54166	1.3758	1.48185	1.42864	1.61069	1.68399	1.34143
		5.10333	1.54505	1.60039	1.52246	1.53977	1.3763	1.48091	1.42787	1.61283	1.68442	1.34207
		5.10667	1.54508	1.59688	1.52355	1.53815	1.3771	1.48087	1.4282	1.61298	1.68323	1.34276
		5.11	1.54334	1.59738	1.5246	1.53499	1.3769	1.4802	1.42946	1.61346	1.68365	1.3427
		5.11333	1.53923	1.59704	1.52282	1.53197	1.37563	1.48054	1.42921	1.61591	1.68386	1.34392
		5.11667	1.53678	1.60019	1.52278	1.53412	1.37632	1.47867	1.42963	1.61718	1.68339	1.34299
		5.12	1.5368	1.59642	1.52433	1.53604	1.3754	1.47881	1.43141	1.61606	1.68316	1.34309
		5.12333	1.53772	1.59972	1.52294	1.53476	1.37389	1.48115	1.43034	1.61385	1.68265	1.3421
		5.12667	1.53967	1.60331	1.52155	1.53795	1.37407	1.48254	1.4303	1.61493	1.68275	1.34111
		5.13	1.54144	1.60064	1.52134	1.53808	1.3737	1.48373	1.43093	1.61459	1.68211	1.33956
		5.13333	1.54386	1.59945	1.52128	1.53332	1.37366	1.48338	1.43098	1.61239	1.68204	1.3398
		5.13667	1.54404	1.60382	1.52	1.53333	1.37469	1.48424	1.43053	1.6109	1.68275	1.34022
		5.14	1.54365	1.60724	1.52099	1.53516	1.37506	1.48071	1.43149	1.60921	1.68344	1.34167
		5.14333	1.5428	1.60496	1.52201	1.53617	1.37527	1.47938	1.43239	1.60689	1.68466	1.34275
		5.14667	1.54264	1.60065	1.52202	1.54004	1.37514	1.48001	1.43183	1.60663	1.68449	1.34463
		5.15	1.54123	1.60014	1.52189	1.54293	1.37519	1.48245	1.43164	1.60708	1.68521	1.34645
		5.15333	1.54365	1.59876	1.52303	1.54205	1.37403	1.48173	1.43092	1.60769	1.68449	1.34658
		5.15667	1.54678	1.59705	1.5226	1.54343	1.37365	1.48205	1.43093	1.61099	1.68377	1.3454
		5.16	1.54924	1.59786	1.52271	1.54191	1.37274	1.48139	1.43054	1.61026	1.68288	1.34529
		5.16333	1.54931	1.60148	1.52223	1.53881	1.37357	1.47976	1.43194	1.61027	1.68313	1.34506
		5.16667	1.54967	1.60097	1.52414	1.53838	1.37438	1.48008	1.43101	1.61141	1.68278	1.3448
		5.17	1.54778	1.60312	1.52372	1.53838	1.37559	1.47893	1.43142	1.61024	1.68238	1.34499
		5.17333	1.54853	1.59876	1.52513	1.53901	1.37822	1.48097	1.43206	1.61119	1.68327	1.34482
		5.17667	1.5462	1.59913	1.52428	1.54208	1.37752	1.47976	1.4323	1.61248	1.68264	1.34459
		5.18	1.54819	1.59791	1.52499	1.54199	1.37798	1.47881	1.43035	1.61411	1.68328	1.34522
		5.18333	1.54925	1.59811	1.523	1.54418	1.37762	1.47532	1.43065	1.61226	1.68416	1.34415
		5.18667	1.55039	1.59663	1.5237	1.54374	1.3785	1.47766	1.42991	1.61413	1.68478	1.34401
		5.19	1.54689	1.5975	1.52217	1.54249	1.37752	1.47547	1.43037	1.61292	1.68412	1.34451
		5.19333	1.54779	1.59516	1.524	1.5368	1.37783	1.47556	1.4287	1.6135	1.68443	1.34524
		5.19667	1.54533	1.59791	1.52461	1.53757	1.37843	1.47719	1.43239	1.61077	1.68568	1.34496
		5.2	1.54447	1.59893	1.52533	1.53532	1.37779	1.48123	1.43239	1.61198	1.68658	1.34717
		5.20333	1.54377	1.602	1.52592	1.53795	1.37638	1.48128	1.43388	1.60939	1.68499	1.34803
		5.20667	1.54566	1.60533	1.5266	1.53775	1.37638	1.48308	1.4333	1.60961	1.68511	1.3483
		5.21	1.54608	1.60737	1.52587	1.54184	1.37823	1.48908	1.43493	1.60959	1.68554	1.34879
		5.21333	1.54607	1.60969	1.52639	1.54154	1.37829	1.49201	1.43099	1.61232	1.68284	1.34835
		5.21667	1.54664	1.60665	1.52461	1.54207	1.37799	1.49247	1.43242	1.6136	1.68168	1.34557
		5.22	1.54798	1.60601	1.52454	1.54053	1.37755	1.49209	1.43182	1.61761	1.68285	1.34477
		5.22333	1.54882	1.60286	1.52447	1.53861	1.37706	1.48979	1.43276	1.61823	1.6845	1.34611
		5.22667	1.54811	1.60329	1.52474	1.53776	1.37593	1.4871	1.43258	1.62018	1.68592	1.34601
		5.23	1.54927	1.60081	1.52465	1.53635	1.3744	1.48427	1.43492	1.61881	1.68803	1.34622
		5.23333	1.55021	1.60445	1.52706	1.53762	1.37603	1.48376	1.43582	1.61943	1.68837	1.34859
		5.23667	1.54906	1.60028	1.52639	1.5384	1.37706	1.48447	1.43693	1.61833	1.68831	1.34965
		5.24	1.55008	1.60216	1.52902	1.5408	1.3776	1.48737	1.43609	1.61929	1.68716	1.34845
		5.24333	1.54937	1.60195	1.5303	1.54331	1.3788	1.48701	1.43566	1.61915	1.68594	1.34795
		5.24667	1.55032	1.60315	1.53186	1.54549	1.37957	1.48774	1.43486	1.61992	1.6863	1.3482
		5.25	1.54825	1.60122	1.53145	1.54543	1.37936	1.48853	1.43324	1.61828	1.68628	1.34776
		5.25333	1.54867	1.60486	1.53226	1.54507	1.37972	1.48847	1.43324	1.61717	1.68701	1.34738
		5.25667	1.54904	1.60529	1.5312	1.54453	1.37826	1.4889	1.43282	1.61801	1.68685	1.34738
		5.26	1.55142	1.60135	1.53069	1.54195	1.3775	1.48917	1.43375	1.61678	1.68751	1.34841
		5.26333	1.55131	1.6035	1.52981	1.54228	1.37956	1.48976	1.43489	1.61648	1.68821	1.34985
		5.26667	1.55152	1.60753	1.531	1.54128	1.3796	1.48896	1.43432	1.61838	1.68742	1.34954
		5.27	1.55341	1.60584	1.53171	1.54064	1.37972	1.48962	1.43434	1.61616	1.68791	1.3494
		5.27333	1.55296	1.60594	1.53102	1.54291	1.38122	1.48583	1.4359	1.61617	1.68918	1.35101
		5.27667	1.55345	1.60822	1.53124	1.54514	1.38115	1.4842	1.43676	1.61631	1.69034	1.35003
		5.28	1.55257	1.60686	1.53124	1.54383	1.37963	1.48245	1.43603	1.61696	1.69061	1.34976
		5.28333	1.5526	1.60443	1.53157	1.54481	1.37899	1.48128	1.43777	1.61386	1.69173	1.35041
		5.28667	1.55278	1.60614	1.53199	1.54507	1.38016	1.48108	1.43772	1.61632	1.69261	1.3514
		5.29	1.55269	1.60619	1.53202	1.54095	1.37918	1.48361	1.43788	1.61325	1.69231	1.34929
		5.29333	1.55188	1.60474	1.53121	1.53962	1.38076	1.48784	1.4363	1.61102	1.68946	1.35077
		5.29667	1.55216	1.60268	1.53179	1.54121	1.38142	1.48908	1.43824	1.60926	1.68788	1.34981
		5.3	1.55445	1.60067	1.53168	1.54305	1.38257	1.49159	1.43882	1.61036	1.68869	1.34898
		5.30333	1.55321	1.60248	1.53213	1.54519	1.38159	1.49141	1.43823	1.60759	1.68751	1.34784
		5.30667	1.55281	1.59962	1.53236	1.54652	1.38258	1.49038	1.43685	1.60911	1.68747	1.34902
		5.31	1.5536	1.60159	1.53443	1.54455	1.38399	1.489	1.43849	1.60983	1.6899	1.34754
		5.31333	1.55579	1.60274	1.53519	1.54411	1.38356	1.49069	1.43584	1.61146	1.69085	1.34747
		5.31667	1.55561	1.60402	1.53552	1.54482	1.38321	1.49053	1.43387	1.611	1.68967	1.34727
		5.32	1.55639	1.60278	1.53605	1.54479	1.38318	1.48989	1.43365	1.61295	1.69118	1.34892
		5.32333	1.55571	1.60623	1.53708	1.54582	1.38304	1.49099	1.43557	1.6121	1.69157	1.34875
		5.32667	1.55486	1.60325	1.53574	1.54913	1.38209	1.48872	1.43501	1.61446	1.69066	1.34994
		5.33	1.55296	1.60414	1.53364	1.54803	1.38198	1.48894	1.4362	1.61534	1.69139	1.34946
		5.33333	1.55225	1.60409	1.53321	1.54481	1.38168	1.48836	1.43754	1.61588	1.69241	1.35026
		5.33667	1.55243	1.60133	1.53042	1.54385	1.38249	1.48883	1.43887	1.61694	1.69059	1.34894
		5.34	1.55249	1.6002	1.53072	1.54493	1.38236	1.48864	1.43712	1.61721	1.69052	1.34808
		5.34333	1.55251	1.60529	1.52985	1.54482	1.38205	1.49108	1.43763	1.61255	1.69038	1.34851
		5.34667	1.55214	1.60314	1.53073	1.54681	1.3824	1.48986	1.43638	1.61045	1.69064	1.34895
		5.35	1.5523	1.60371	1.53016	1.54746	1.38265	1.48803	1.43626	1.61446	1.69088	1.35038
		5.35333	1.55356	1.60493	1.53186	1.54716	1.38305	1.48955	1.43519	1.61476	1.69199	1.3517
		5.35667	1.55413	1.60792	1.53106	1.54732	1.38323	1.49057	1.43594	1.61533	1.68984	1.3521
		5.36	1.55445	1.60717	1.5324	1.54856	1.38347	1.48815	1.43665	1.62091	1.69088	1.35214
		5.36333	1.55604	1.60887	1.532	1.54823	1.3829	1.48945	1.43984	1.62408	1.6893	1.35135
		5.36667	1.55631	1.60664	1.53655	1.54742	1.38326	1.49304	1.43956	1.61991	1.68884	1.35022
		5.37	1.55473	1.60471	1.53493	1.54757	1.38339	1.49186	1.44115	1.62095	1.68932	1.35093
		5.37333	1.55536	1.60699	1.53991	1.54666	1.38338	1.49127	1.44076	1.6191	1.69208	1.35207
		5.37667	1.555	1.60435	1.54112	1.54266	1.38326	1.49396	1.43894	1.61583	1.69095	1.3523
		5.38	1.55524	1.60635	1.5434	1.54403	1.384	1.4923	1.43787	1.6143	1.6932	1.35352
		5.38333	1.55496	1.61262	1.54141	1.54718	1.38408	1.48971	1.43876	1.61452	1.69217	1.35396
		5.38667	1.55577	1.61475	1.54452	1.54754	1.3838	1.49282	1.43876	1.61547	1.69337	1.35356
		5.39	1.55538	1.61122	1.53936	1.5483	1.38367	1.49382	1.43929	1.61847	1.69121	1.35333
		5.39333	1.55559	1.61284	1.53863	1.54983	1.38292	1.49175	1.43941	1.61871	1.69334	1.35241
		5.39667	1.55528	1.61129	1.53667	1.54898	1.384	1.49104	1.43992	1.61889	1.69224	1.35323
		5.4	1.55652	1.60787	1.53483	1.54541	1.38406	1.49217	1.44017	1.61967	1.69293	1.35261
		5.40333	1.5556	1.60915	1.53518	1.54799	1.38302	1.49028	1.43818	1.61835	1.69075	1.35299
		5.40667	1.55692	1.61249	1.53524	1.54833	1.38321	1.49199	1.43888	1.61841	1.69303	1.35254
		5.41	1.5576	1.61352	1.53477	1.55104	1.38452	1.49542	1.44046	1.62183	1.69176	1.3534
		5.41333	1.55841	1.61318	1.53667	1.55115	1.38393	1.49769	1.43928	1.62319	1.69149	1.35352
		5.41667	1.55891	1.61649	1.53801	1.55194	1.38482	1.49789	1.43887	1.62432	1.69044	1.35355
		5.42	1.55864	1.61425	1.53785	1.54993	1.38531	1.50045	1.44069	1.62353	1.69071	1.3539
		5.42333	1.55887	1.61141	1.53846	1.54933	1.38523	1.49545	1.44109	1.62421	1.69086	1.35485
		5.42667	1.55879	1.60989	1.53909	1.54708	1.38489	1.49247	1.43961	1.62417	1.69134	1.35562
		5.43	1.55978	1.60949	1.5377	1.54673	1.38555	1.49057	1.43999	1.62342	1.69253	1.35553
		5.43333	1.56057	1.60703	1.53796	1.54921	1.38586	1.49247	1.44015	1.62337	1.69342	1.35598
		5.43667	1.56052	1.60872	1.5381	1.55005	1.38677	1.48985	1.44057	1.62307	1.69375	1.35586
		5.44	1.55927	1.60975	1.54056	1.5502	1.38747	1.49552	1.4404	1.62251	1.69325	1.35412
		5.44333	1.55974	1.61034	1.54124	1.55068	1.38731	1.49583	1.44067	1.62077	1.69231	1.35315
		5.44667	1.55965	1.61203	1.54309	1.55307	1.38648	1.49925	1.44111	1.6198	1.69212	1.3525
		5.45	1.55653	1.61375	1.54056	1.5515	1.3866	1.4984	1.4407	1.62077	1.69363	1.35278
		5.45333	1.55812	1.61624	1.53988	1.5502	1.38612	1.49972	1.43941	1.62427	1.69408	1.35245
		5.45667	1.5571	1.61317	1.54031	1.55298	1.385	1.49457	1.43844	1.62597	1.69426	1.35398
		5.46	1.55976	1.61531	1.54	1.55529	1.38388	1.49606	1.43965	1.62643	1.6951	1.35398
		5.46333	1.55653	1.61537	1.53855	1.55419	1.38553	1.49504	1.44014	1.62881	1.69437	1.35514
		5.46667	1.55873	1.61215	1.54211	1.555	1.38344	1.49599	1.44081	1.62741	1.6939	1.35607
		5.47	1.55865	1.61277	1.54243	1.55689	1.38388	1.49556	1.44138	1.62561	1.69554	1.35643
		5.47333	1.56066	1.61426	1.54174	1.55546	1.38538	1.49857	1.44101	1.62572	1.69533	1.35778
		5.47667	1.55745	1.61308	1.54205	1.5544	1.38603	1.49677	1.44103	1.62415	1.6947	1.35844
		5.48	1.55955	1.6134	1.54207	1.554	1.38598	1.49534	1.44089	1.62174	1.6956	1.35844
		5.48333	1.5601	1.61617	1.54151	1.55288	1.38756	1.49402	1.44021	1.62443	1.69545	1.35873
		5.48667	1.55947	1.61392	1.53977	1.55256	1.38731	1.49345	1.44045	1.62496	1.69333	1.35773
		5.49	1.55888	1.61411	1.53937	1.55109	1.38667	1.4936	1.44023	1.62713	1.69329	1.35722
		5.49333	1.56041	1.61239	1.53882	1.55087	1.38728	1.49754	1.4399	1.62947	1.69427	1.35854
		5.49667	1.56074	1.61104	1.54029	1.55072	1.38581	1.49819	1.44038	1.63227	1.69511	1.35936
		5.5	1.55966	1.61057	1.53959	1.5499	1.38569	1.49669	1.44193	1.63095	1.69509	1.3597
		5.50333	1.56073	1.60926	1.54066	1.55139	1.38524	1.49562	1.44212	1.63171	1.6956	1.35996
		5.50667	1.56188	1.6118	1.54067	1.55165	1.3861	1.49718	1.4441	1.62766	1.69586	1.35899
		5.51	1.56223	1.61616	1.54065	1.55192	1.38649	1.49545	1.44432	1.62877	1.69549	1.35731
		5.51333	1.5601	1.61407	1.54006	1.54927	1.38623	1.49776	1.44386	1.62762	1.69391	1.35655
		5.51667	1.56176	1.61277	1.54019	1.55195	1.38606	1.49872	1.44232	1.62764	1.69431	1.35635
		5.52	1.56413	1.61362	1.54065	1.55017	1.38676	1.49941	1.44126	1.62797	1.69493	1.35655
		5.52333	1.56096	1.61187	1.54108	1.54805	1.38654	1.49751	1.44172	1.62669	1.69555	1.35656
		5.52667	1.563	1.61025	1.54155	1.54714	1.38662	1.49507	1.4411	1.62544	1.69434	1.35542
		5.53	1.56458	1.61353	1.54155	1.55	1.38812	1.49159	1.4412	1.62534	1.69411	1.35696
		5.53333	1.56296	1.61417	1.5425	1.5494	1.38835	1.48986	1.4408	1.62557	1.69431	1.35538
		5.53667	1.56242	1.61526	1.54162	1.55028	1.38855	1.4913	1.44206	1.62108	1.6938	1.35671
		5.54	1.56675	1.61372	1.53923	1.55123	1.38819	1.4907	1.44167	1.62209	1.69282	1.35747
		5.54333	1.56401	1.61181	1.54027	1.55409	1.38792	1.49395	1.44204	1.61978	1.69518	1.35886
		5.54667	1.56463	1.61045	1.54195	1.55465	1.38785	1.49575	1.43953	1.61888	1.69623	1.35746
		5.55	1.5654	1.61187	1.54385	1.55596	1.3877	1.4984	1.44184	1.61775	1.6964	1.35863
		5.55333	1.56341	1.61058	1.54413	1.55336	1.38875	1.49784	1.44153	1.62021	1.69812	1.35891
		5.55667	1.56345	1.61411	1.54748	1.55392	1.38925	1.49751	1.44167	1.61936	1.69859	1.35889
		5.56	1.56285	1.61424	1.54794	1.55205	1.39025	1.49427	1.44086	1.62285	1.69877	1.35957
		5.56333	1.56345	1.61406	1.54427	1.5537	1.39002	1.49301	1.44397	1.62296	1.69926	1.36084
		5.56667	1.56283	1.61367	1.54123	1.55193	1.39077	1.49269	1.44248	1.62072	1.6995	1.36143
		5.57	1.56367	1.61372	1.5453	1.55446	1.38962	1.49503	1.44239	1.62086	1.69904	1.35897
		5.57333	1.56277	1.61551	1.5389	1.55653	1.39033	1.49642	1.44147	1.62002	1.69997	1.36014
		5.57667	1.56343	1.61874	1.54101	1.55728	1.38931	1.49887	1.44159	1.61787	1.69927	1.35924
		5.58	1.56476	1.61925	1.5452	1.55503	1.39022	1.50083	1.44093	1.61898	1.69967	1.35857
		5.58333	1.56627	1.61634	1.5474	1.55801	1.39024	1.50009	1.44096	1.62164	1.70012	1.35828
		5.58667	1.56513	1.61788	1.54448	1.55813	1.39091	1.49677	1.44285	1.62187	1.69923	1.36078
		5.59	1.56423	1.6131	1.55016	1.5575	1.39067	1.4965	1.44414	1.62419	1.69894	1.35845
		5.59333	1.56628	1.61199	1.54785	1.55749	1.39138	1.49593	1.44489	1.62493	1.70022	1.35784
		5.59667	1.56811	1.61226	1.54625	1.55771	1.39108	1.49594	1.446	1.6259	1.7005	1.35731
		5.6	1.56606	1.6141	1.54501	1.55644	1.39179	1.49637	1.4478	1.62659	1.69958	1.3586
		5.60333	1.56914	1.61398	1.54458	1.55591	1.39101	1.49308	1.4477	1.62503	1.69991	1.35715
		5.60667	1.57095	1.61649	1.54485	1.55534	1.39141	1.49134	1.44676	1.6242	1.69932	1.35833
		5.61	1.56923	1.61749	1.54494	1.55481	1.39093	1.49259	1.44759	1.625	1.69916	1.359
		5.61333	1.56515	1.61709	1.54664	1.55617	1.3911	1.49211	1.44685	1.625	1.69797	1.35955
		5.61667	1.56737	1.61495	1.54573	1.55433	1.39022	1.48982	1.44506	1.62329	1.69735	1.3603
		5.62	1.56629	1.6127	1.54765	1.55521	1.39206	1.4927	1.4443	1.625	1.69686	1.36279
		5.62333	1.56673	1.61047	1.54747	1.55742	1.39083	1.49508	1.4451	1.62364	1.69754	1.36322
		5.62667	1.56529	1.60831	1.5482	1.5598	1.39109	1.49403	1.44464	1.62311	1.69621	1.36421
		5.63	1.56731	1.60808	1.54569	1.5605	1.39022	1.49449	1.44441	1.62049	1.69642	1.36431
		5.63333	1.56828	1.61069	1.54747	1.56176	1.39104	1.49726	1.44437	1.62035	1.69802	1.36188
		5.63667	1.56893	1.61437	1.54595	1.56257	1.38983	1.49976	1.44447	1.62252	1.69924	1.3601
		5.64	1.56956	1.61641	1.54428	1.56094	1.39112	1.50073	1.4435	1.6248	1.69897	1.36188
		5.64333	1.57317	1.61788	1.5438	1.55863	1.39164	1.50012	1.44203	1.62475	1.6991	1.36108
		5.64667	1.57238	1.61901	1.54483	1.55673	1.3924	1.49998	1.44352	1.62818	1.69972	1.36142
		5.65	1.57146	1.61756	1.54314	1.55874	1.39231	1.50044	1.44388	1.62839	1.69906	1.36225
		5.65333	1.56909	1.61536	1.54386	1.55696	1.39349	1.50011	1.44429	1.62344	1.69841	1.36424
		5.65667	1.56856	1.61379	1.54588	1.556	1.39316	1.49816	1.44485	1.62376	1.69734	1.3646
		5.66	1.5663	1.6129	1.54625	1.55499	1.39318	1.49955	1.44588	1.62292	1.69836	1.36544
		5.66333	1.56801	1.61297	1.54767	1.55619	1.3926	1.49926	1.44436	1.62192	1.69734	1.36605
		5.66667	1.56817	1.61382	1.54967	1.55448	1.39085	1.5005	1.44471	1.62579	1.69642	1.36566
		5.67	1.56973	1.61127	1.54996	1.55551	1.39009	1.50076	1.44499	1.63057	1.69568	1.36562
		5.67333	1.57071	1.61328	1.54958	1.55568	1.3904	1.49979	1.44575	1.63028	1.69851	1.36255
		5.67667	1.57309	1.61208	1.54875	1.55949	1.38891	1.49842	1.44733	1.63239	1.69915	1.36281
		5.68	1.57324	1.61154	1.54794	1.55866	1.38878	1.49917	1.44822	1.63116	1.6988	1.36199
		5.68333	1.57411	1.61333	1.54692	1.55849	1.39006	1.49644	1.44864	1.63041	1.7013	1.36271
		5.68667	1.57438	1.61585	1.54853	1.55721	1.39073	1.49669	1.44805	1.6311	1.70214	1.36192
		5.69	1.57258	1.61326	1.54805	1.55928	1.39049	1.49933	1.44669	1.63223	1.70067	1.36252
		5.69333	1.57183	1.61746	1.55043	1.55757	1.39259	1.49948	1.44524	1.63085	1.70063	1.36249
		5.69667	1.57038	1.62099	1.54942	1.55903	1.39331	1.49922	1.44514	1.63059	1.70131	1.36314
		5.7	1.57092	1.62169	1.55018	1.55927	1.39236	1.50093	1.44537	1.6313	1.69996	1.36213
		5.70333	1.57065	1.62316	1.54868	1.56279	1.39171	1.50052	1.44614	1.63008	1.70061	1.36198
		5.70667	1.5719	1.62362	1.54852	1.56267	1.39196	1.50008	1.44598	1.63261	1.70144	1.36329
		5.71	1.57097	1.62425	1.54814	1.56287	1.39035	1.5007	1.44619	1.63212	1.70201	1.36385
		5.71333	1.57291	1.62243	1.54895	1.5633	1.39071	1.50094	1.44505	1.6346	1.70205	1.3642
		5.71667	1.57359	1.6228	1.54928	1.56555	1.39262	1.50242	1.44532	1.63272	1.70251	1.36622
		5.72	1.57177	1.62288	1.54858	1.56353	1.39305	1.50283	1.44584	1.6329	1.70188	1.36693
		5.72333	1.57224	1.6251	1.5491	1.56486	1.39466	1.50344	1.44612	1.63005	1.70043	1.36622
		5.72667	1.57568	1.6222	1.54696	1.5646	1.39582	1.50389	1.44682	1.631	1.70084	1.36637
		5.73	1.57526	1.62296	1.54678	1.56421	1.39633	1.5045	1.44761	1.63077	1.70118	1.36679
		5.73333	1.57135	1.61892	1.54634	1.563	1.39612	1.50004	1.44704	1.62988	1.70135	1.36539
		5.73667	1.57526	1.61899	1.5471	1.56344	1.39624	1.49991	1.44513	1.62851	1.70177	1.36615
		5.74	1.57643	1.61834	1.54833	1.56237	1.39484	1.5004	1.44638	1.62945	1.7024	1.3657
		5.74333	1.57346	1.62048	1.54818	1.56175	1.39504	1.50443	1.447	1.62802	1.70169	1.36364
		5.74667	1.57251	1.61719	1.54969	1.56215	1.3958	1.50545	1.4468	1.62601	1.70123	1.3642
		5.75	1.57473	1.61947	1.54988	1.56215	1.39497	1.50785	1.44623	1.62636	1.70214	1.36509
		5.75333	1.57388	1.61798	1.55001	1.55992	1.39438	1.50809	1.44694	1.6273	1.7033	1.36416
		5.75667	1.57197	1.61787	1.5482	1.55929	1.39544	1.50707	1.44653	1.62416	1.70379	1.36627
		5.76	1.57479	1.61406	1.54908	1.56209	1.39577	1.50498	1.44613	1.62436	1.70388	1.36823
		5.76333	1.57413	1.6163	1.54869	1.56086	1.39395	1.50243	1.4465	1.62451	1.70434	1.36669
		5.76667	1.57585	1.6163	1.54885	1.56119	1.3951	1.50403	1.44723	1.62384	1.70408	1.36752
		5.77	1.57752	1.61677	1.54756	1.5624	1.39519	1.50541	1.44893	1.62238	1.70354	1.36599
		5.77333	1.57983	1.61637	1.54761	1.56211	1.3944	1.50453	1.44773	1.62797	1.70294	1.3658
		5.77667	1.57855	1.61784	1.5492	1.56252	1.39449	1.50212	1.44887	1.63107	1.70411	1.36567
		5.78	1.58046	1.61765	1.54887	1.56435	1.39512	1.50439	1.4489	1.63226	1.70464	1.36578
		5.78333	1.57895	1.61905	1.55	1.56311	1.39458	1.50118	1.44924	1.63212	1.7033	1.36515
		5.78667	1.57651	1.61993	1.55151	1.56384	1.39551	1.49944	1.44775	1.63484	1.70301	1.36744
		5.79	1.5749	1.61911	1.55247	1.56497	1.39477	1.4994	1.44886	1.63233	1.70555	1.36644
		5.79333	1.57572	1.61874	1.55124	1.56277	1.39466	1.49961	1.44792	1.62988	1.70431	1.36619
		5.79667	1.57498	1.61778	1.5519	1.56038	1.39412	1.50015	1.44917	1.6299	1.70472	1.36706
		5.8	1.57645	1.61596	1.55008	1.56061	1.39385	1.50482	1.44943	1.63191	1.70483	1.3668
		5.80333	1.57658	1.61512	1.54915	1.5606	1.39316	1.50643	1.45012	1.62943	1.70491	1.36681
		5.80667	1.57573	1.61795	1.54886	1.55902	1.39361	1.50725	1.45063	1.63037	1.70442	1.36658
		5.81	1.57423	1.61925	1.54778	1.56144	1.39486	1.5088	1.45025	1.63267	1.70402	1.36708
		5.81333	1.57491	1.61992	1.54991	1.56218	1.39534	1.50707	1.44871	1.63202	1.70358	1.36571
		5.81667	1.57478	1.62335	1.55004	1.56297	1.39604	1.50416	1.44823	1.63078	1.70475	1.36543
		5.82	1.57527	1.62436	1.55031	1.56194	1.39575	1.50186	1.44781	1.63296	1.70404	1.36475
		5.82333	1.57674	1.62243	1.55145	1.56573	1.3962	1.50296	1.44771	1.63065	1.70373	1.36613
		5.82667	1.57857	1.62318	1.55351	1.5635	1.39509	1.50463	1.44672	1.62785	1.7043	1.36684
		5.83	1.57921	1.62465	1.5505	1.56294	1.39639	1.50545	1.44765	1.62804	1.70412	1.36763
		5.83333	1.57856	1.62357	1.55152	1.56188	1.3961	1.50706	1.44756	1.62781	1.7037	1.36891
		5.83667	1.58065	1.62226	1.55339	1.56304	1.39731	1.5066	1.4484	1.62461	1.70506	1.36844
		5.84	1.58161	1.62205	1.55361	1.56017	1.3981	1.50679	1.44839	1.62678	1.70531	1.36867
		5.84333	1.57925	1.62231	1.55564	1.56093	1.39874	1.50543	1.45028	1.62837	1.70606	1.36814
		5.84667	1.5796	1.62257	1.55339	1.56403	1.39739	1.50543	1.45067	1.62883	1.70731	1.36894
		5.85	1.58087	1.6216	1.55724	1.56697	1.3989	1.50591	1.45108	1.62963	1.70766	1.36888
		5.85333	1.58074	1.62018	1.55245	1.56596	1.39793	1.50918	1.45065	1.63201	1.70744	1.36998
		5.85667	1.58005	1.62154	1.55613	1.56846	1.39855	1.50867	1.45019	1.63431	1.70647	1.37015
		5.86	1.58296	1.62024	1.55368	1.56944	1.39773	1.50854	1.44986	1.63548	1.7057	1.37011
		5.86333	1.58313	1.62037	1.55696	1.56724	1.39997	1.51052	1.45015	1.63531	1.70427	1.36952
		5.86667	1.5832	1.61943	1.55301	1.56578	1.39971	1.51131	1.45031	1.63442	1.70336	1.36962
		5.87	1.58165	1.62242	1.5575	1.56755	1.4007	1.50976	1.44997	1.63734	1.70355	1.36869
		5.87333	1.58203	1.62119	1.55504	1.56523	1.39911	1.5112	1.45264	1.63564	1.70406	1.36844
		5.87667	1.58084	1.62298	1.55572	1.56324	1.39967	1.51155	1.45179	1.63445	1.70358	1.36917
		5.88	1.57878	1.6231	1.5557	1.56327	1.39756	1.50869	1.45286	1.63696	1.70476	1.36993
		5.88333	1.57786	1.62248	1.55644	1.56476	1.39684	1.50742	1.45181	1.63846	1.70531	1.36931
		5.88667	1.57687	1.62411	1.55697	1.5646	1.3972	1.50886	1.45303	1.63618	1.7043	1.3705
		5.89	1.57621	1.62504	1.55672	1.5654	1.39801	1.50779	1.45118	1.63567	1.70482	1.37078
		5.89333	1.57443	1.62556	1.55638	1.56669	1.39876	1.50723	1.45202	1.63764	1.70576	1.37101
		5.89667	1.57602	1.62217	1.55581	1.56685	1.39995	1.50804	1.45024	1.63674	1.70578	1.37063
		5.9	1.5777	1.62449	1.55649	1.56408	1.39976	1.50814	1.45261	1.6378	1.70598	1.36977
		5.90333	1.58171	1.62433	1.55653	1.56565	1.40019	1.50665	1.45177	1.63822	1.70696	1.37004
		5.90667	1.58105	1.62479	1.55606	1.56578	1.39933	1.50548	1.4526	1.64143	1.7057	1.36989
		5.91	1.58376	1.62216	1.55525	1.56462	1.39785	1.50734	1.45297	1.63923	1.70681	1.36969
		5.91333	1.58309	1.62631	1.555	1.56666	1.39898	1.50894	1.45152	1.63906	1.70605	1.37064
		5.91667	1.58294	1.62587	1.55472	1.56799	1.40045	1.50965	1.45188	1.63977	1.70604	1.37071
		5.92	1.58087	1.62435	1.55436	1.56662	1.40018	1.51229	1.45185	1.63678	1.70635	1.36987
		5.92333	1.58311	1.62293	1.5548	1.56651	1.401	1.51313	1.45191	1.63434	1.70793	1.36995
		5.92667	1.58266	1.62299	1.55658	1.56757	1.40188	1.51199	1.45164	1.63399	1.70689	1.37062
		5.93	1.58223	1.62278	1.55721	1.5647	1.4007	1.50999	1.45369	1.63318	1.70881	1.371
		5.93333	1.58383	1.62262	1.55328	1.56662	1.40127	1.50775	1.45259	1.63121	1.70878	1.37323
		5.93667	1.58496	1.62591	1.55466	1.56679	1.40011	1.50625	1.45253	1.63031	1.70943	1.37367
		5.94	1.58507	1.62712	1.5508	1.56709	1.39965	1.50768	1.45247	1.6296	1.70726	1.37381
		5.94333	1.58514	1.6281	1.55138	1.5658	1.40033	1.50794	1.45394	1.62678	1.70723	1.37236
		5.94667	1.58783	1.62622	1.55126	1.56777	1.39987	1.51032	1.4535	1.62669	1.7065	1.37187
		5.95	1.58717	1.62607	1.5559	1.56598	1.4002	1.51182	1.4526	1.62744	1.70837	1.37044
		5.95333	1.58569	1.62216	1.55423	1.5659	1.40185	1.5107	1.4536	1.6299	1.70824	1.37058
		5.95667	1.58467	1.62233	1.55861	1.56496	1.40184	1.50747	1.45113	1.6314	1.70912	1.36929
		5.96	1.58379	1.62746	1.55854	1.56692	1.39976	1.50725	1.45106	1.63499	1.70992	1.36988
		5.96333	1.58261	1.63127	1.55933	1.56571	1.39949	1.50511	1.45108	1.63439	1.70994	1.36993
		5.96667	1.58091	1.63154	1.55865	1.56709	1.39784	1.50568	1.45268	1.63474	1.71095	1.36904
		5.97	1.58141	1.63224	1.55992	1.56734	1.3975	1.50657	1.45256	1.63859	1.71077	1.36848
		5.97333	1.58244	1.63216	1.55972	1.56914	1.3975	1.51243	1.45381	1.63919	1.71107	1.37087
		5.97667	1.58501	1.62916	1.55952	1.56846	1.39978	1.51197	1.45265	1.64053	1.71105	1.37033
		5.98	1.58609	1.62721	1.55959	1.56821	1.40081	1.51256	1.45429	1.642	1.71065	1.37025
		5.98333	1.58654	1.62944	1.56025	1.56925	1.40153	1.51028	1.45337	1.64183	1.70904	1.37182
		5.98667	1.58782	1.63116	1.5571	1.56802	1.4005	1.51157	1.45264	1.6396	1.70881	1.37274
		5.99	1.58667	1.63274	1.55567	1.5654	1.40105	1.50921	1.453	1.63666	1.70876	1.37235
		5.99333	1.58476	1.6336	1.55498	1.5661	1.40133	1.50796	1.45395	1.63688	1.70862	1.37283
		5.99667	1.58396	1.63299	1.55489	1.56826	1.40102	1.50714	1.45221	1.63834	1.70855	1.37372
		6	1.5829	1.62926	1.55416	1.56582	1.40093	1.5095	1.45341	1.63627	1.70882	1.37262
		6.00333	1.58048	1.62918	1.55668	1.56729	1.40067	1.5064	1.45385	1.63401	1.70921	1.37249
		6.00667	1.5821	1.62703	1.55771	1.56819	1.40148	1.50564	1.4555	1.63498	1.70888	1.372
		6.01	1.58289	1.62713	1.55758	1.568	1.39992	1.50962	1.45644	1.63242	1.70844	1.37283
		6.01333	1.58275	1.62712	1.5589	1.56765	1.40036	1.51257	1.45639	1.63022	1.70914	1.37246
		6.01667	1.5846	1.62863	1.56022	1.56918	1.3994	1.51199	1.45614	1.63094	1.70878	1.37406
		6.02	1.58566	1.62881	1.56074	1.56839	1.40144	1.51528	1.45717	1.6314	1.70808	1.37437
		6.02333	1.58499	1.63124	1.56109	1.57085	1.4011	1.51704	1.45706	1.63235	1.70701	1.37349
		6.02667	1.58469	1.62853	1.56116	1.57155	1.40247	1.51601	1.4558	1.63598	1.70839	1.37297
		6.03	1.58496	1.62758	1.56139	1.57219	1.40226	1.51528	1.45735	1.63544	1.70856	1.37246
		6.03333	1.58389	1.62745	1.56055	1.57249	1.40291	1.51684	1.45652	1.63531	1.70704	1.37288
		6.03667	1.58343	1.62769	1.55883	1.57273	1.40202	1.51623	1.4562	1.63765	1.70747	1.37312
		6.04	1.58481	1.62556	1.55911	1.57065	1.40161	1.51528	1.45556	1.63948	1.71098	1.37373
		6.04333	1.58583	1.62685	1.55843	1.57019	1.40213	1.51358	1.45602	1.64121	1.71057	1.37447
		6.04667	1.58659	1.62995	1.55683	1.5719	1.40169	1.51172	1.45406	1.64435	1.71051	1.37674
		6.05	1.58871	1.63266	1.55591	1.57256	1.40254	1.51216	1.45456	1.64696	1.71278	1.37728
		6.05333	1.59189	1.63301	1.55687	1.57093	1.40256	1.51372	1.45393	1.64888	1.7135	1.37713
		6.05667	1.58973	1.63354	1.55545	1.57333	1.40321	1.51344	1.4546	1.64726	1.71269	1.37812
		6.06	1.58884	1.63103	1.55679	1.57248	1.40318	1.51643	1.45468	1.64301	1.71128	1.3788
		6.06333	1.59037	1.6268	1.55886	1.57065	1.40325	1.51612	1.45607	1.64142	1.71057	1.37739
		6.06667	1.58807	1.6247	1.56051	1.568	1.40261	1.51477	1.45609	1.64143	1.7092	1.37704
		6.07	1.58394	1.62556	1.56207	1.57221	1.40317	1.51307	1.45728	1.63987	1.71008	1.37792
		6.07333	1.58672	1.62647	1.56315	1.57151	1.40361	1.51291	1.45718	1.63904	1.70993	1.37806
		6.07667	1.58752	1.62996	1.56646	1.57218	1.40225	1.51104	1.45642	1.64053	1.71024	1.37831
		6.08	1.58628	1.63316	1.56379	1.57083	1.40276	1.51022	1.45552	1.63998	1.71208	1.37759
		6.08333	1.58835	1.63548	1.56214	1.57325	1.40238	1.51204	1.45486	1.63714	1.71269	1.37691
		6.08667	1.5922	1.63377	1.56395	1.57154	1.40108	1.51227	1.45467	1.63746	1.71193	1.37581
		6.09	1.59112	1.63351	1.56277	1.5719	1.40088	1.5135	1.45371	1.63791	1.71272	1.37444
		6.09333	1.59231	1.63293	1.56078	1.57291	1.4002	1.51479	1.4538	1.63807	1.71255	1.37363
		6.09667	1.59402	1.63287	1.56298	1.57389	1.4007	1.51657	1.45522	1.639	1.71056	1.37432
		6.1	1.59225	1.632	1.56462	1.57306	1.40128	1.51225	1.45594	1.63926	1.71308	1.37637
		6.10333	1.59269	1.63008	1.56341	1.57313	1.4021	1.51033	1.4558	1.63784	1.71228	1.37717
		6.10667	1.59136	1.63127	1.56554	1.5735	1.40158	1.5105	1.45577	1.63581	1.71187	1.37698
		6.11	1.59139	1.63193	1.56327	1.57282	1.40269	1.51006	1.45586	1.63416	1.71299	1.37726
		6.11333	1.59035	1.62994	1.563	1.57276	1.40269	1.51267	1.45625	1.63505	1.71444	1.37873
		6.11667	1.59199	1.62925	1.5634	1.57074	1.40272	1.51572	1.45618	1.63637	1.71147	1.3776
		6.12	1.59171	1.63255	1.56298	1.57229	1.40338	1.51545	1.45418	1.63452	1.71185	1.37789
		6.12333	1.59347	1.63191	1.56289	1.57228	1.40399	1.51374	1.45686	1.63701	1.71068	1.37859
		6.12667	1.59201	1.63258	1.56445	1.57336	1.40313	1.5153	1.4571	1.63921	1.71037	1.37738
		6.13	1.59173	1.63356	1.56627	1.57507	1.4029	1.51341	1.45656	1.63838	1.70951	1.37495
		6.13333	1.59275	1.6346	1.56663	1.57825	1.40368	1.5157	1.45674	1.6405	1.7103	1.37456
		6.13667	1.59308	1.63336	1.56703	1.57659	1.40252	1.51921	1.45788	1.64564	1.71089	1.37343
		6.14	1.59368	1.63529	1.56731	1.57637	1.40332	1.52109	1.45778	1.64612	1.71169	1.37389
		6.14333	1.59335	1.63375	1.56806	1.57527	1.40482	1.51819	1.45746	1.64519	1.7126	1.37493
		6.14667	1.59441	1.63305	1.5662	1.57584	1.40535	1.51787	1.45654	1.64517	1.71387	1.37683
		6.15	1.59312	1.63315	1.56684	1.57492	1.4049	1.51528	1.45562	1.64158	1.71417	1.377
		6.15333	1.59069	1.63275	1.56611	1.57548	1.40614	1.51354	1.45665	1.6399	1.71512	1.37774
		6.15667	1.58865	1.62903	1.5665	1.57567	1.40397	1.51287	1.45619	1.63924	1.71599	1.37916
		6.16	1.58943	1.62938	1.56668	1.57659	1.40271	1.51531	1.45635	1.63975	1.71531	1.38041
		6.16333	1.587	1.63275	1.56752	1.57562	1.40253	1.51543	1.45632	1.64082	1.7147	1.38003
		6.16667	1.5872	1.63216	1.56683	1.57542	1.40361	1.51697	1.45726	1.6452	1.71314	1.38068
		6.17	1.58794	1.63082	1.56758	1.57537	1.40343	1.51867	1.45729	1.64759	1.71301	1.38126
		6.17333	1.58789	1.63225	1.56831	1.57544	1.40352	1.51933	1.45613	1.64852	1.71228	1.3813
		6.17667	1.58862	1.63417	1.56913	1.5753	1.40403	1.5182	1.45819	1.65119	1.71225	1.3806
		6.18	1.58976	1.6324	1.56899	1.57529	1.40483	1.51835	1.45902	1.652	1.71204	1.38052
		6.18333	1.58995	1.6321	1.56856	1.57456	1.40325	1.51686	1.45896	1.65047	1.71499	1.3796
		6.18667	1.59096	1.63336	1.56757	1.57506	1.40295	1.51826	1.4591	1.64799	1.71381	1.38041
		6.19	1.59241	1.63357	1.56866	1.57469	1.40402	1.51782	1.4588	1.64764	1.71373	1.37871
		6.19333	1.59346	1.6312	1.56596	1.57388	1.40448	1.51948	1.45715	1.64427	1.71444	1.37826
		6.19667	1.5937	1.63113	1.56649	1.57423	1.40281	1.52043	1.45769	1.64431	1.71475	1.37805
		6.2	1.59482	1.62953	1.56703	1.57484	1.40282	1.5206	1.45891	1.64456	1.71277	1.37899
		6.20333	1.59482	1.63094	1.56781	1.57427	1.4048	1.51758	1.45786	1.6453	1.71388	1.37847
		6.20667	1.59693	1.63141	1.56588	1.57377	1.40441	1.51693	1.45921	1.64591	1.71581	1.38096
		6.21	1.59799	1.63255	1.56751	1.57525	1.40572	1.51431	1.46025	1.64864	1.71498	1.38222
		6.21333	1.59859	1.6335	1.56657	1.57256	1.40615	1.5147	1.45933	1.64788	1.71597	1.38387
		6.21667	1.60025	1.63401	1.56582	1.57451	1.40794	1.51572	1.45834	1.64741	1.71712	1.38282
		6.22	1.60222	1.6323	1.56547	1.57742	1.40694	1.51649	1.45925	1.64604	1.71657	1.38253
		6.22333	1.59943	1.6329	1.56787	1.57851	1.40702	1.51548	1.45839	1.64568	1.71567	1.3821
		6.22667	1.59798	1.63038	1.56502	1.57713	1.40552	1.51782	1.45767	1.64453	1.71593	1.38162
		6.23	1.598	1.62985	1.56574	1.57809	1.40634	1.51869	1.45873	1.64466	1.71462	1.38066
		6.23333	1.59652	1.63221	1.56776	1.57774	1.40501	1.52113	1.45952	1.64528	1.71554	1.38155
		6.23667	1.5958	1.63289	1.56589	1.57539	1.40399	1.52187	1.45897	1.64892	1.71374	1.382
		6.24	1.5981	1.63164	1.56398	1.57397	1.40549	1.52376	1.45909	1.64877	1.71282	1.38092
		6.24333	1.59952	1.63278	1.56636	1.57418	1.40561	1.52381	1.46067	1.64707	1.71366	1.38169
		6.24667	1.60142	1.63247	1.56652	1.57603	1.40676	1.52171	1.46102	1.64681	1.71516	1.38096
		6.25	1.60004	1.62961	1.56476	1.57557	1.40642	1.51782	1.46081	1.64892	1.71426	1.38168
		6.25333	1.59818	1.63163	1.56752	1.57455	1.40625	1.51467	1.46175	1.64481	1.71605	1.3815
		6.25667	1.59889	1.63466	1.56839	1.5748	1.40569	1.51502	1.46198	1.64552	1.71776	1.38178
		6.26	1.60003	1.63481	1.57054	1.57337	1.40602	1.51192	1.46016	1.64844	1.71723	1.38109
		6.26333	1.59841	1.63454	1.57022	1.57499	1.40498	1.51243	1.45859	1.64878	1.71591	1.38227
		6.26667	1.59911	1.63704	1.572	1.57528	1.40649	1.51483	1.45947	1.64643	1.71516	1.38203
		6.27	1.59981	1.6358	1.57063	1.57754	1.40646	1.51879	1.46028	1.64599	1.71502	1.38221
		6.27333	1.59699	1.63427	1.56947	1.57816	1.40751	1.51918	1.46033	1.64424	1.71347	1.38338
		6.27667	1.59576	1.63224	1.56788	1.58073	1.40781	1.52176	1.46038	1.64274	1.71509	1.38362
		6.28	1.59508	1.63097	1.56852	1.57953	1.40819	1.52357	1.46144	1.64193	1.71661	1.38409
		6.28333	1.59491	1.62948	1.56805	1.58049	1.40769	1.52355	1.46091	1.64178	1.71828	1.38528
		6.28667	1.59647	1.63017	1.56989	1.58005	1.40871	1.52293	1.45953	1.64229	1.71765	1.38505
		6.29	1.59803	1.63004	1.57028	1.58144	1.40846	1.52363	1.45987	1.6422	1.71815	1.38586
		6.29333	1.59945	1.63412	1.57166	1.58084	1.40759	1.52213	1.45948	1.6398	1.71758	1.38559
		6.29667	1.60172	1.63551	1.57186	1.58084	1.40787	1.52009	1.4603	1.63767	1.71753	1.38504
		6.3	1.60181	1.63701	1.57125	1.58143	1.40729	1.52133	1.46011	1.63722	1.71682	1.38388
		6.30333	1.5996	1.63583	1.57176	1.58098	1.40636	1.52192	1.46091	1.63597	1.718	1.38449
		6.30667	1.60031	1.63555	1.57271	1.57864	1.40575	1.52182	1.46047	1.63579	1.71931	1.38396
		6.31	1.59905	1.63508	1.57181	1.57973	1.40631	1.52398	1.4616	1.63701	1.71857	1.3841
		6.31333	1.59891	1.63501	1.57269	1.58013	1.40605	1.52421	1.46229	1.63807	1.71786	1.38573
		6.31667	1.60083	1.63463	1.57469	1.57777	1.40632	1.52419	1.46239	1.6371	1.71818	1.38563
		6.32	1.60406	1.63692	1.57395	1.57781	1.40915	1.52453	1.46198	1.63964	1.71747	1.38648
		6.32333	1.60451	1.63743	1.57321	1.57932	1.40764	1.52552	1.46264	1.64401	1.71676	1.38636
		6.32667	1.60253	1.63802	1.57314	1.58062	1.40803	1.52494	1.46345	1.64575	1.71713	1.38574
		6.33	1.60132	1.63994	1.57287	1.58008	1.40848	1.5275	1.46209	1.64736	1.71711	1.38428
		6.33333	1.59926	1.63864	1.57034	1.58141	1.4084	1.52597	1.46168	1.64741	1.71728	1.38546
		6.33667	1.59724	1.63759	1.57099	1.58109	1.40646	1.52528	1.46214	1.64492	1.71809	1.38478
		6.34	1.59663	1.63714	1.57085	1.58322	1.40764	1.5235	1.46275	1.64099	1.71888	1.38473
		6.34333	1.59945	1.63834	1.57115	1.58134	1.40641	1.52226	1.46237	1.63972	1.71795	1.38651
		6.34667	1.59968	1.63782	1.57118	1.58263	1.40619	1.51891	1.46304	1.63859	1.71838	1.38585
		6.35	1.60107	1.64064	1.5715	1.57995	1.40693	1.51967	1.46376	1.64033	1.71871	1.38584
		6.35333	1.6019	1.63863	1.57146	1.57932	1.40812	1.52033	1.46411	1.64199	1.7193	1.38663
		6.35667	1.60154	1.6394	1.57381	1.57902	1.40845	1.51963	1.464	1.64348	1.71788	1.38715
		6.36	1.60034	1.6383	1.57404	1.58015	1.41077	1.51985	1.46388	1.64698	1.71878	1.38628
		6.36333	1.60286	1.63783	1.57123	1.57907	1.41186	1.523	1.46345	1.64667	1.71864	1.38746
		6.36667	1.60342	1.63708	1.5702	1.58135	1.41143	1.52287	1.46313	1.64464	1.71872	1.38706
		6.37	1.60212	1.63805	1.56847	1.58284	1.40959	1.52246	1.46212	1.64484	1.71795	1.38707
		6.37333	1.60332	1.63725	1.56818	1.58213	1.4105	1.52511	1.46233	1.64575	1.72003	1.38658
		6.37667	1.60192	1.63664	1.56779	1.57976	1.40843	1.52748	1.46172	1.64403	1.71978	1.38739
		6.38	1.59996	1.63589	1.56968	1.58144	1.4078	1.52387	1.46197	1.64497	1.71896	1.38744
		6.38333	1.59943	1.63549	1.57118	1.58283	1.40713	1.52198	1.46268	1.64811	1.71864	1.38819
		6.38667	1.6005	1.63578	1.57247	1.58326	1.40817	1.52281	1.46363	1.64927	1.71798	1.38714
		6.39	1.59987	1.63716	1.57099	1.58151	1.40771	1.52192	1.46379	1.64879	1.71715	1.38825
		6.39333	1.60168	1.63683	1.57084	1.58336	1.40836	1.52111	1.46267	1.64749	1.71875	1.38681
		6.39667	1.60314	1.6364	1.57058	1.58294	1.40707	1.52225	1.46312	1.64877	1.71954	1.38708
		6.4	1.60264	1.63416	1.57027	1.58243	1.4082	1.52355	1.4622	1.64928	1.72049	1.38652
		6.40333	1.60292	1.63521	1.57104	1.58251	1.40874	1.52213	1.46213	1.64731	1.72134	1.38646
		6.40667	1.60262	1.6336	1.57145	1.58461	1.40944	1.52162	1.46167	1.64799	1.72026	1.38647
		6.41	1.60211	1.63372	1.57081	1.58474	1.40996	1.52205	1.46367	1.64917	1.71959	1.38872
		6.41333	1.60209	1.63386	1.57147	1.58375	1.41196	1.5238	1.46463	1.64821	1.71985	1.3881
		6.41667	1.60332	1.63533	1.57334	1.58442	1.41166	1.52521	1.46534	1.64584	1.71881	1.38745
		6.42	1.60221	1.63375	1.57531	1.58346	1.41173	1.5248	1.46663	1.6493	1.71834	1.3882
		6.42333	1.60393	1.63419	1.57409	1.5823	1.41157	1.52502	1.46683	1.64916	1.72016	1.38815
		6.42667	1.60352	1.63284	1.57491	1.58416	1.41022	1.5235	1.46679	1.64841	1.72055	1.38733
		6.43	1.60281	1.63366	1.57479	1.58319	1.40808	1.52247	1.46468	1.6493	1.72114	1.38719
		6.43333	1.60299	1.63651	1.57395	1.58421	1.40799	1.52249	1.46462	1.64991	1.72187	1.38781
		6.43667	1.60378	1.63909	1.57253	1.5838	1.40775	1.52362	1.46264	1.64948	1.72253	1.38828
		6.44	1.60343	1.63932	1.57293	1.58454	1.40804	1.5228	1.46435	1.64866	1.72171	1.38704
		6.44333	1.60311	1.64061	1.57569	1.58395	1.40939	1.52331	1.46378	1.65038	1.72054	1.38642
		6.44667	1.60223	1.64165	1.57466	1.58223	1.41127	1.52425	1.46478	1.65183	1.7198	1.38752
		6.45	1.60295	1.64297	1.57743	1.58178	1.41199	1.52119	1.46466	1.65264	1.71902	1.38823
		6.45333	1.60363	1.64183	1.57656	1.58351	1.41273	1.52109	1.4654	1.6533	1.71939	1.38781
		6.45667	1.60374	1.6421	1.57593	1.58463	1.41189	1.52204	1.46267	1.65061	1.71875	1.38726
		6.46	1.60793	1.64176	1.57344	1.58201	1.41229	1.52457	1.46355	1.64891	1.71926	1.3883
		6.46333	1.60987	1.64211	1.57448	1.58506	1.41211	1.52516	1.46327	1.64802	1.71935	1.38925
		6.46667	1.6095	1.64148	1.57262	1.58348	1.41232	1.52724	1.46345	1.64879	1.72021	1.38884
		6.47	1.61008	1.64083	1.57267	1.58296	1.41203	1.52552	1.46435	1.64679	1.72028	1.39048
		6.47333	1.61081	1.63971	1.57424	1.5826	1.41277	1.52377	1.46565	1.64827	1.72225	1.39081
		6.47667	1.6075	1.63927	1.57499	1.58325	1.41251	1.52268	1.46562	1.64907	1.72229	1.39048
		6.48	1.60684	1.63714	1.5755	1.58384	1.41194	1.52202	1.46531	1.65016	1.72365	1.38886
		6.48333	1.60525	1.6324	1.5753	1.58378	1.41098	1.51779	1.46584	1.65086	1.72346	1.38795
		6.48667	1.6048	1.63214	1.57515	1.58512	1.41204	1.51883	1.4648	1.65007	1.7219	1.38745
		6.49	1.60309	1.63286	1.57658	1.58605	1.41108	1.52011	1.46486	1.65327	1.72046	1.38883
		6.49333	1.60384	1.63231	1.57795	1.58807	1.41153	1.51894	1.46495	1.65161	1.72062	1.38853
		6.49667	1.60248	1.63107	1.57793	1.58751	1.41311	1.51938	1.46628	1.64836	1.71964	1.38879
		6.5	1.60395	1.63305	1.57839	1.58936	1.41305	1.52365	1.46659	1.64532	1.72012	1.39078
		6.50333	1.60577	1.63421	1.57787	1.58817	1.41147	1.5227	1.46692	1.64499	1.72205	1.38977
		6.50667	1.60684	1.63586	1.57612	1.58656	1.41291	1.52205	1.46506	1.64185	1.72239	1.3886
		6.51	1.6074	1.63887	1.57707	1.58428	1.41206	1.52256	1.46662	1.64357	1.72246	1.39002
		6.51333	1.6101	1.6424	1.57696	1.58301	1.4121	1.52277	1.46511	1.64463	1.72198	1.39017
		6.51667	1.60806	1.6437	1.57688	1.58162	1.41161	1.52555	1.46569	1.64628	1.72295	1.38901
		6.52	1.60828	1.64268	1.57709	1.57938	1.41221	1.52618	1.46476	1.64816	1.72292	1.38972
		6.52333	1.60825	1.64268	1.57778	1.58108	1.41164	1.52716	1.46656	1.65074	1.72264	1.39164
		6.52667	1.6073	1.64162	1.57558	1.5824	1.41158	1.52746	1.46333	1.64815	1.72327	1.39112
		6.53	1.6059	1.64251	1.57687	1.58425	1.41066	1.52792	1.4641	1.64874	1.72268	1.39105
		6.53333	1.60851	1.64225	1.57669	1.5834	1.41236	1.5262	1.46292	1.64958	1.72222	1.39078
		6.53667	1.60701	1.64466	1.57653	1.58712	1.4118	1.52828	1.46326	1.65153	1.72216	1.39098
		6.54	1.60747	1.64346	1.57675	1.58531	1.41155	1.5288	1.46376	1.65361	1.72284	1.38974
		6.54333	1.60769	1.6435	1.57876	1.58699	1.41237	1.52853	1.46523	1.65707	1.72287	1.38975
		6.54667	1.60997	1.6436	1.58025	1.58706	1.41235	1.52857	1.46408	1.65873	1.72276	1.39228
		6.55	1.61005	1.64495	1.58046	1.58891	1.41147	1.52728	1.46393	1.66029	1.72223	1.39175
		6.55333	1.61153	1.64328	1.58094	1.58605	1.41321	1.52639	1.46484	1.66001	1.72199	1.39173
		6.55667	1.61093	1.6437	1.58134	1.58885	1.41385	1.52494	1.46341	1.6563	1.72064	1.39182
		6.56	1.61282	1.64385	1.58203	1.58681	1.41453	1.52406	1.46451	1.65541	1.72069	1.39224
		6.56333	1.61056	1.64341	1.58019	1.58651	1.41567	1.52306	1.46469	1.65582	1.72227	1.39126
		6.56667	1.60952	1.64285	1.5799	1.58695	1.41529	1.52564	1.46586	1.65309	1.72264	1.39276
		6.57	1.60744	1.64053	1.58006	1.58863	1.41494	1.52808	1.46722	1.64752	1.7232	1.39185
		6.57333	1.6085	1.63998	1.58182	1.58735	1.41538	1.52935	1.46756	1.64958	1.7242	1.39215
		6.57667	1.60947	1.63922	1.57938	1.58905	1.4154	1.52948	1.46693	1.64774	1.72421	1.39144
		6.58	1.61027	1.64003	1.58007	1.58975	1.41492	1.53007	1.46897	1.64494	1.72489	1.39048
		6.58333	1.61194	1.63922	1.5792	1.58899	1.41608	1.52748	1.46903	1.64636	1.72419	1.39165
		6.58667	1.61393	1.64202	1.57942	1.58998	1.4151	1.52679	1.46701	1.64895	1.72408	1.3924
		6.59	1.61424	1.64204	1.57769	1.58978	1.41342	1.52714	1.46786	1.64804	1.72484	1.39277
		6.59333	1.61128	1.64328	1.57911	1.58945	1.41138	1.52698	1.46881	1.65226	1.72498	1.39254
		6.59667	1.61273	1.64277	1.57913	1.58901	1.41038	1.52738	1.46883	1.65274	1.72492	1.3919
		6.6	1.61227	1.64415	1.58058	1.58848	1.4109	1.52704	1.46904	1.65303	1.72575	1.39121
		6.60333	1.61135	1.64575	1.58222	1.58781	1.41166	1.52605	1.46955	1.65783	1.72598	1.39237
		6.60667	1.6124	1.64716	1.58322	1.58723	1.41257	1.52735	1.46987	1.65914	1.72579	1.39163
		6.61	1.61503	1.6455	1.58309	1.58669	1.41504	1.52809	1.46909	1.65746	1.72531	1.39221
		6.61333	1.61507	1.64632	1.58183	1.58605	1.41536	1.52962	1.46825	1.65896	1.72459	1.39511
		6.61667	1.61523	1.6452	1.58128	1.58818	1.41455	1.5311	1.46635	1.65958	1.72454	1.39442
		6.62	1.61802	1.645	1.58039	1.58703	1.41494	1.53268	1.4653	1.65399	1.72364	1.39355
		6.62333	1.61734	1.64492	1.58086	1.58657	1.41453	1.53218	1.46522	1.65461	1.72435	1.395
		6.62667	1.61642	1.64767	1.58011	1.58718	1.41213	1.53303	1.46518	1.6545	1.72529	1.39513
		6.63	1.61417	1.64594	1.58125	1.58687	1.4135	1.53187	1.46513	1.65136	1.72544	1.39405
		6.63333	1.61302	1.64581	1.58266	1.58495	1.41331	1.53093	1.46713	1.65258	1.72623	1.3952
		6.63667	1.61045	1.64494	1.58261	1.58612	1.41305	1.53038	1.46865	1.65558	1.72715	1.39345
		6.64	1.61092	1.64395	1.58136	1.58734	1.41369	1.53001	1.46791	1.65505	1.72742	1.39312
		6.64333	1.61048	1.6426	1.58122	1.58738	1.41482	1.53106	1.46775	1.65702	1.72714	1.39237
		6.64667	1.61208	1.64302	1.58182	1.58773	1.41495	1.53074	1.46748	1.65825	1.72588	1.39211
		6.65	1.61187	1.64449	1.58123	1.58894	1.41583	1.53008	1.46715	1.65464	1.72527	1.39112
		6.65333	1.61195	1.64391	1.58269	1.58843	1.41613	1.52982	1.46805	1.65211	1.72542	1.39308
		6.65667	1.61156	1.64505	1.58197	1.58822	1.41706	1.53099	1.46821	1.65281	1.72528	1.39235
[truncated: 19,152 more rows]
