# Supplementary material for: Evolution towards simplicity in bacterial small heat shock protein system
Source: eLife. 2023 Dec 8;12:RP89813. doi: 10.7554/eLife.89813 (PMC10708888; doi:10.7554/eLife.89813)
Supplement: Figure 6—source data 7. [file elife-89813-fig6-data7.xlsx]

## Sheet: Arkusz1
			Response [nm]
		time[min]	5uM IbpA H66Q D109G +Hsp70 repeat 1	5uM IbpA E.coli Q66H G109D +Hsp70 repeat 2	5uM IbpA E.coli Q66H G109D +Hsp70 repeat 3	5uM IbpA E. coli Q66H G109D + Hsp70 repeat 4	5uM IbpA Q66H G109D -Hsp70 repeat 1	5uM IbpA E.coli Q66H G109D - Hsp70 repeat 2	For data for 'No sHsp + Hsp70' see Fig. 6 - source data 4
		0	0.344432	0.315398	0.609298	0.228452	0.36514	0.426053
		0.003333	0.328757	0.315265	0.608125	0.231842	0.351974	0.419172
		0.006667	0.325744	0.313726	0.599396	0.225576	0.355342	0.413763
		0.01	0.323183	0.314496	0.597241	0.224684	0.353556	0.41379
		0.013333	0.321938	0.313908	0.596571	0.218766	0.355191	0.412123
		0.016667	0.320806	0.313091	0.594679	0.212129	0.353651	0.410863
		0.02	0.319982	0.310885	0.591699	0.207934	0.358801	0.410724
		0.023333	0.319324	0.311628	0.59328	0.207856	0.355576	0.411261
		0.026667	0.317331	0.308698	0.591078	0.199996	0.358884	0.410506
		0.03	0.316077	0.306992	0.588754	0.195494	0.357341	0.409514
		0.033333	0.31424	0.306377	0.580905	0.194511	0.360566	0.40874
		0.036667	0.31597	0.305453	0.578855	0.187762	0.358643	0.407714
		0.04	0.317324	0.302691	0.581156	0.182116	0.360346	0.407744
		0.043333	0.314308	0.301383	0.579098	0.182424	0.358782	0.40537
		0.046667	0.318724	0.300708	0.576782	0.178637	0.360542	0.405581
		0.05	0.314729	0.299711	0.582716	0.170624	0.360017	0.405526
		0.053333	0.317802	0.298542	0.583158	0.169195	0.362859	0.405158
		0.056667	0.313832	0.298581	0.578272	0.165551	0.362981	0.40572
		0.06	0.314961	0.297755	0.578923	0.162439	0.367643	0.406112
		0.063333	0.308354	0.295785	0.579725	0.166814	0.368167	0.403613
		0.066667	0.312235	0.294783	0.578634	0.168442	0.369053	0.405898
		0.07	0.307001	0.295676	0.579061	0.168297	0.369921	0.404066
		0.073333	0.3065	0.293585	0.578202	0.173663	0.374358	0.400237
		0.076667	0.30808	0.294778	0.577869	0.176339	0.371293	0.404347
		0.08	0.309073	0.295966	0.576356	0.177962	0.37307	0.405735
		0.083333	0.30593	0.296386	0.576071	0.185877	0.375222	0.403107
		0.086667	0.306008	0.295717	0.573918	0.189864	0.376686	0.404414
		0.09	0.307596	0.295425	0.574017	0.190992	0.376014	0.407147
		0.093333	0.308087	0.294395	0.571585	0.192855	0.377278	0.40324
		0.096667	0.308999	0.294492	0.571502	0.193175	0.378652	0.401989
		0.1	0.314974	0.293149	0.572965	0.191068	0.381341	0.400595
		0.103333	0.314933	0.293226	0.574711	0.190317	0.382082	0.400105
		0.106667	0.315421	0.293472	0.57683	0.186689	0.382345	0.398156
		0.11	0.315083	0.293577	0.577097	0.184518	0.384616	0.400057
		0.113333	0.315823	0.292075	0.57945	0.181927	0.383698	0.400874
		0.116667	0.31271	0.292422	0.579599	0.179565	0.384296	0.403187
		0.12	0.315	0.291742	0.579616	0.178045	0.385556	0.40333
		0.123333	0.31282	0.290866	0.579424	0.179324	0.388263	0.405452
		0.126667	0.312671	0.290905	0.581774	0.177763	0.387823	0.402268
		0.13	0.310447	0.290976	0.580229	0.177248	0.392455	0.401851
		0.133333	0.30955	0.290385	0.579121	0.173698	0.393109	0.400942
		0.136667	0.307006	0.289385	0.580383	0.173987	0.392376	0.400944
		0.14	0.308366	0.290762	0.580287	0.170833	0.392145	0.400812
		0.143333	0.312701	0.291193	0.580091	0.170221	0.393653	0.400934
		0.146667	0.308268	0.2924	0.57936	0.169877	0.392249	0.402491
		0.15	0.314272	0.292898	0.581163	0.173223	0.390966	0.399478
		0.153333	0.315887	0.295018	0.57803	0.17141	0.391827	0.399112
		0.156667	0.315341	0.295491	0.577724	0.173178	0.393701	0.397064
		0.16	0.311858	0.297004	0.577833	0.17494	0.395489	0.397286
		0.163333	0.318138	0.296693	0.579926	0.176115	0.394158	0.394685
		0.166667	0.313667	0.29646	0.579216	0.178616	0.3952	0.395894
		0.17	0.313985	0.295513	0.579776	0.179851	0.395777	0.396548
		0.173333	0.315071	0.295059	0.579295	0.179966	0.395832	0.397929
		0.176667	0.313817	0.292943	0.579257	0.180918	0.395037	0.397853
		0.18	0.312827	0.29319	0.578812	0.181357	0.396431	0.400097
		0.183333	0.310809	0.294358	0.576238	0.180052	0.396324	0.399059
		0.186667	0.309725	0.295844	0.578309	0.18093	0.398264	0.397504
		0.19	0.3095	0.296551	0.578339	0.181084	0.397616	0.399282
		0.193333	0.309501	0.298993	0.579114	0.178141	0.400002	0.399674
		0.196667	0.307254	0.299404	0.579566	0.178445	0.402995	0.395843
		0.2	0.309907	0.299396	0.581575	0.179532	0.404933	0.396617
		0.203333	0.309507	0.3013	0.581306	0.179145	0.406185	0.400463
		0.206667	0.310755	0.303702	0.579985	0.178642	0.407086	0.397407
		0.21	0.312858	0.304253	0.579952	0.181052	0.406339	0.398969
		0.213333	0.314582	0.30529	0.579141	0.180562	0.405004	0.400967
		0.216667	0.314925	0.30592	0.578413	0.179825	0.404661	0.402121
		0.22	0.316204	0.305428	0.577626	0.182633	0.402448	0.399519
		0.223333	0.315211	0.305491	0.57785	0.183675	0.404165	0.400123
		0.226667	0.314824	0.306027	0.577999	0.190223	0.403713	0.397301
		0.23	0.316924	0.306881	0.577004	0.188576	0.40252	0.397512
		0.233333	0.317508	0.308643	0.578006	0.195303	0.400689	0.396255
		0.236667	0.319302	0.309091	0.578089	0.192457	0.401598	0.397642
		0.24	0.320096	0.308364	0.578792	0.194805	0.400183	0.397621
		0.243333	0.31919	0.308374	0.577426	0.188781	0.398867	0.397133
		0.246667	0.31844	0.308957	0.577941	0.190195	0.396591	0.397028
		0.25	0.31817	0.30835	0.576471	0.182885	0.398671	0.39684
		0.253333	0.316308	0.309525	0.57675	0.183917	0.39618	0.394232
		0.256667	0.314932	0.310753	0.575171	0.181809	0.395462	0.394692
		0.26	0.314476	0.31092	0.575853	0.180394	0.397129	0.396531
		0.263333	0.314392	0.310858	0.575243	0.180567	0.400179	0.396324
		0.266667	0.314155	0.310488	0.575004	0.181047	0.398185	0.397454
		0.27	0.315279	0.310289	0.576289	0.179553	0.400131	0.399914
		0.273333	0.312997	0.309138	0.577948	0.177476	0.400806	0.398703
		0.276667	0.314998	0.308017	0.577075	0.178388	0.400586	0.395916
		0.28	0.311357	0.307046	0.575573	0.177334	0.398373	0.395595
		0.283333	0.308632	0.307569	0.576234	0.179708	0.400182	0.396194
		0.286667	0.306886	0.306713	0.575421	0.1808	0.399359	0.394926
		0.29	0.309531	0.307193	0.574773	0.180724	0.400234	0.393522
		0.293333	0.310149	0.309147	0.573324	0.182563	0.398181	0.396135
		0.296667	0.312317	0.309978	0.575502	0.18438	0.400325	0.393694
		0.3	0.313126	0.310495	0.577324	0.183058	0.399234	0.395458
		0.303333	0.311409	0.311812	0.576608	0.182754	0.399654	0.392708
		0.306667	0.310802	0.31212	0.57629	0.185232	0.39833	0.392133
		0.31	0.306872	0.312426	0.578192	0.182267	0.397606	0.393537
		0.313333	0.306788	0.313094	0.576865	0.181587	0.39886	0.395289
		0.316667	0.306733	0.312919	0.574564	0.180978	0.39888	0.391697
		0.32	0.309476	0.312239	0.574866	0.181509	0.397372	0.392535
		0.323333	0.311063	0.313319	0.574959	0.18381	0.398051	0.394599
		0.326667	0.31201	0.312424	0.574692	0.184869	0.401143	0.392929
		0.33	0.312278	0.312291	0.573568	0.184481	0.400991	0.392333
		0.333333	0.3136	0.312906	0.57357	0.185081	0.40072	0.393656
		0.336667	0.314886	0.311616	0.572884	0.184795	0.400795	0.393959
		0.34	0.312132	0.310586	0.573142	0.18316	0.400106	0.396217
		0.343333	0.312814	0.309888	0.572575	0.186203	0.397473	0.393859
		0.346667	0.310973	0.309762	0.572876	0.184262	0.396684	0.395436
		0.35	0.309225	0.308994	0.574389	0.18601	0.398445	0.393568
		0.353333	0.307059	0.310032	0.574344	0.18904	0.401172	0.395186
		0.356667	0.308685	0.308636	0.575259	0.185755	0.402061	0.393242
		0.36	0.30704	0.307937	0.575722	0.183356	0.402061	0.394683
		0.363333	0.308347	0.307459	0.57769	0.185798	0.400976	0.396673
		0.366667	0.307413	0.307954	0.576383	0.184001	0.398372	0.397066
		0.37	0.308161	0.308406	0.576713	0.1813	0.398517	0.397287
		0.373333	0.304862	0.309578	0.573891	0.183221	0.397254	0.395645
		0.376667	0.30904	0.311061	0.573478	0.182025	0.39869	0.396664
		0.38	0.312724	0.312314	0.574348	0.181207	0.400752	0.394275
		0.383333	0.311511	0.311534	0.573968	0.17938	0.401389	0.394334
		0.386667	0.30926	0.310486	0.572658	0.179974	0.397615	0.39522
		0.39	0.30972	0.310022	0.575821	0.178424	0.397504	0.395589
		0.393333	0.307076	0.308923	0.575519	0.177762	0.397856	0.395133
		0.396667	0.302527	0.308208	0.575266	0.177619	0.394355	0.394362
		0.4	0.306401	0.309161	0.575703	0.180448	0.394724	0.393391
		0.403333	0.306366	0.309723	0.576548	0.180721	0.395545	0.39223
		0.406667	0.308056	0.312268	0.57326	0.181914	0.395508	0.395527
		0.41	0.306795	0.311069	0.573764	0.183925	0.396924	0.394317
		0.413333	0.307037	0.310575	0.571769	0.18335	0.398215	0.394912
		0.416667	0.304856	0.308961	0.571851	0.184447	0.397767	0.396752
		0.42	0.304852	0.309483	0.570104	0.183232	0.39977	0.396143
		0.423333	0.308735	0.305955	0.572045	0.183875	0.400163	0.391633
		0.426667	0.31229	0.308646	0.570761	0.18208	0.399388	0.391979
		0.43	0.311645	0.309438	0.570029	0.183791	0.400577	0.393793
		0.433333	0.309701	0.3101	0.571182	0.180308	0.399464	0.391641
		0.436667	0.31192	0.308378	0.574242	0.181406	0.39911	0.392817
		0.44	0.308334	0.30852	0.575512	0.181483	0.400081	0.396295
		0.443333	0.30595	0.307587	0.576845	0.181194	0.397631	0.394955
		0.446667	0.30942	0.306875	0.578374	0.180091	0.398336	0.394227
		0.45	0.312542	0.306886	0.578263	0.183007	0.399095	0.394311
		0.453333	0.312162	0.306657	0.57773	0.182056	0.398267	0.394403
		0.456667	0.313555	0.307369	0.577443	0.181902	0.396543	0.391511
		0.46	0.312568	0.307328	0.578609	0.18276	0.400406	0.390995
		0.463333	0.314595	0.307317	0.579209	0.182784	0.397385	0.391811
		0.466667	0.310761	0.308043	0.577643	0.181692	0.399144	0.393877
		0.47	0.312033	0.309093	0.5761	0.180225	0.400678	0.392245
		0.473333	0.308987	0.309697	0.574238	0.178701	0.400787	0.391497
		0.476667	0.309301	0.309315	0.573912	0.180005	0.395427	0.393051
		0.48	0.304167	0.309203	0.572514	0.179502	0.396273	0.393947
		0.483333	0.307688	0.308294	0.572985	0.178997	0.39463	0.392827
		0.486667	0.307399	0.307686	0.571939	0.178753	0.392345	0.393248
		0.49	0.308299	0.308414	0.571743	0.181137	0.391107	0.395655
		0.493333	0.309904	0.309024	0.571482	0.17989	0.395226	0.395343
		0.496667	0.31151	0.309122	0.572926	0.180124	0.395921	0.394127
		0.5	0.044282	0.05404	0.02622	0.026104	0.011857	0.03352
		0.503333	0.015194	0.015226	0.010856	0.005028	0.002468	0.032315
		0.506667	0.014765	0.002336	0.000759	0	0.001151	0.013898
		0.51	0	0.006632	0	0.004833	0	0
		0.513333	0.012032	0.007642	0.007362	0.01564	0.006032	0.002588
		0.516667	0.0103	0	0.004223	0.011214	0.007554	0.003939
		0.52	0.016482	0.005622	0.012225	0.017599	0.017276	0.007696
		0.523333	0.019279	0.012552	0.021477	0.024138	0.02672	0.016868
		0.526667	0.024959	0.018065	0.032394	0.030203	0.036202	0.028052
		0.53	0.028074	0.024432	0.041659	0.033351	0.044196	0.041434
		0.533333	0.033082	0.031854	0.050998	0.039365	0.05076	0.048579
		0.536667	0.039569	0.039689	0.060092	0.044207	0.057096	0.058856
		0.54	0.047247	0.046479	0.071446	0.050653	0.063128	0.069333
		0.543333	0.052433	0.052947	0.077824	0.056591	0.067902	0.080325
		0.546667	0.058955	0.059278	0.086224	0.0649	0.073983	0.087633
		0.55	0.060026	0.065153	0.095736	0.071499	0.079764	0.095551
		0.553333	0.063858	0.073269	0.102889	0.08145	0.084167	0.103029
		0.556667	0.067097	0.081215	0.109176	0.089779	0.089221	0.108396
		0.56	0.074516	0.088345	0.117183	0.101203	0.097145	0.11142
		0.563333	0.082211	0.094685	0.125634	0.111055	0.101746	0.118494
		0.566667	0.091422	0.100468	0.134809	0.123666	0.11068	0.124959
		0.57	0.097037	0.106821	0.144295	0.133549	0.117827	0.130733
		0.573333	0.106146	0.111414	0.152688	0.142527	0.121773	0.137323
		0.576667	0.113047	0.117464	0.161063	0.148931	0.127879	0.147559
		0.58	0.118157	0.124442	0.16804	0.156498	0.133526	0.153989
		0.583333	0.123229	0.132737	0.175585	0.161773	0.139059	0.161882
		0.586667	0.129591	0.139996	0.185754	0.167155	0.143785	0.16745
		0.59	0.13501	0.146614	0.189677	0.171781	0.151248	0.176317
		0.593333	0.141777	0.152797	0.202167	0.178783	0.151675	0.183354
		0.596667	0.146568	0.157984	0.210573	0.182714	0.159892	0.190865
		0.6	0.152887	0.162885	0.216102	0.189519	0.164258	0.1966
		0.603333	0.159447	0.167792	0.222376	0.194972	0.169889	0.2036
		0.606667	0.165183	0.173315	0.232356	0.201446	0.175356	0.209942
		0.61	0.171145	0.179428	0.235946	0.205482	0.182402	0.213251
		0.613333	0.174784	0.186286	0.241721	0.210322	0.183106	0.217196
		0.616667	0.183071	0.192795	0.249972	0.215529	0.184418	0.223429
		0.62	0.185953	0.198537	0.256097	0.220495	0.187442	0.229384
		0.623333	0.191911	0.205904	0.262682	0.225778	0.19262	0.236479
		0.626667	0.196777	0.210761	0.26714	0.230517	0.198781	0.244686
		0.63	0.204604	0.216963	0.274089	0.237855	0.20353	0.25113
		0.633333	0.207847	0.222665	0.27841	0.240735	0.208156	0.257341
		0.636667	0.217084	0.229766	0.285217	0.244419	0.215938	0.260847
		0.64	0.221651	0.233058	0.289916	0.24789	0.218831	0.264562
		0.643333	0.225938	0.239361	0.297722	0.252898	0.224194	0.269474
		0.646667	0.231267	0.243959	0.301469	0.254665	0.230002	0.27564
		0.65	0.235784	0.249657	0.307527	0.259848	0.237999	0.280344
		0.653333	0.240111	0.254744	0.314323	0.266103	0.241738	0.287516
		0.656667	0.245374	0.261445	0.321207	0.270353	0.247207	0.293405
		0.66	0.251095	0.266348	0.32509	0.274708	0.249241	0.297831
		0.663333	0.257502	0.273425	0.33273	0.279896	0.25515	0.301275
		0.666667	0.263331	0.277216	0.338921	0.284196	0.257838	0.306811
		0.67	0.269558	0.282798	0.341742	0.286757	0.262325	0.310674
		0.673333	0.273915	0.288765	0.344931	0.292344	0.26582	0.314946
		0.676667	0.278712	0.294556	0.349057	0.295144	0.271612	0.320769
		0.68	0.282684	0.297117	0.35334	0.299004	0.275431	0.326807
		0.683333	0.286533	0.302201	0.359293	0.302585	0.280544	0.330676
		0.686667	0.290465	0.307597	0.364603	0.306727	0.285476	0.333876
		0.69	0.297233	0.310837	0.370979	0.309464	0.290442	0.338891
		0.693333	0.301766	0.313964	0.377861	0.311793	0.29383	0.3425
		0.696667	0.306088	0.320594	0.381704	0.316329	0.296133	0.34815
		0.7	0.311332	0.324358	0.385419	0.320136	0.300673	0.351479
		0.703333	0.316425	0.328881	0.392186	0.32511	0.304826	0.358002
		0.706667	0.319189	0.333644	0.395705	0.327255	0.307258	0.36364
		0.71	0.324034	0.339125	0.400791	0.333902	0.309198	0.367688
		0.713333	0.329406	0.34231	0.406563	0.336992	0.312124	0.369951
		0.716667	0.333198	0.348438	0.412322	0.34165	0.315458	0.374325
		0.72	0.33999	0.353166	0.418642	0.344684	0.318857	0.377954
		0.723333	0.344807	0.358053	0.424253	0.351115	0.322198	0.381298
		0.726667	0.35025	0.361694	0.426896	0.354481	0.327239	0.387301
		0.73	0.352657	0.365448	0.431632	0.357941	0.334508	0.391974
		0.733333	0.354998	0.368211	0.434296	0.360912	0.337313	0.395887
		0.736667	0.3588	0.372034	0.438012	0.364119	0.343461	0.400746
		0.74	0.361184	0.375499	0.440461	0.366188	0.345549	0.403909
		0.743333	0.36251	0.380948	0.443694	0.368412	0.350218	0.406084
		0.746667	0.366707	0.385209	0.445387	0.369804	0.3532	0.410948
		0.75	0.372285	0.390201	0.450613	0.372135	0.357744	0.414285
		0.753333	0.376216	0.394479	0.454103	0.375498	0.361751	0.418337
		0.756667	0.379316	0.399168	0.458337	0.378709	0.366955	0.420993
		0.76	0.38375	0.402131	0.465029	0.381657	0.36891	0.424396
		0.763333	0.388088	0.407442	0.470983	0.386572	0.37115	0.42635
		0.766667	0.39236	0.410659	0.474837	0.389914	0.371826	0.42919
		0.77	0.396759	0.414641	0.47961	0.392254	0.37456	0.431142
		0.773333	0.402407	0.417325	0.4847	0.394054	0.379191	0.433817
		0.776667	0.405628	0.422013	0.488422	0.39732	0.382831	0.438897
		0.78	0.405353	0.423287	0.491641	0.399864	0.38506	0.44466
		0.783333	0.409255	0.426884	0.495114	0.401963	0.388548	0.447768
		0.786667	0.412196	0.431332	0.498365	0.40613	0.39127	0.450934
		0.79	0.416525	0.435362	0.502326	0.409553	0.394541	0.455738
		0.793333	0.419934	0.437949	0.505522	0.413587	0.397939	0.458533
		0.796667	0.424406	0.441477	0.509558	0.416374	0.40324	0.458408
		0.8	0.426208	0.444012	0.511561	0.420813	0.408204	0.46407
		0.803333	0.429468	0.446639	0.514706	0.424137	0.409925	0.468531
		0.806667	0.432354	0.448559	0.516974	0.428241	0.411932	0.471177
		0.81	0.435831	0.451952	0.517112	0.429701	0.416553	0.473986
		0.813333	0.439427	0.456152	0.519307	0.433524	0.416015	0.476069
		0.816667	0.444088	0.460532	0.523826	0.435267	0.417518	0.477802
		0.82	0.448397	0.464898	0.528534	0.435816	0.421476	0.478363
		0.823333	0.451132	0.468428	0.530822	0.438396	0.424696	0.481798
		0.826667	0.454865	0.470463	0.535496	0.441205	0.426454	0.485005
		0.83	0.459844	0.473462	0.539567	0.443364	0.431243	0.491923
		0.833333	0.46211	0.47636	0.543022	0.446076	0.435731	0.495906
		0.836667	0.463626	0.480235	0.545437	0.449438	0.438826	0.501389
		0.84	0.465309	0.484079	0.550724	0.450672	0.440384	0.503298
		0.843333	0.469469	0.488452	0.553432	0.452841	0.444012	0.505641
		0.846667	0.471975	0.490761	0.554693	0.454765	0.445609	0.508003
		0.85	0.475513	0.494664	0.555249	0.458203	0.447547	0.509919
		0.853333	0.480753	0.497665	0.558534	0.461803	0.447654	0.51231
		0.856667	0.483744	0.499913	0.559793	0.46327	0.448577	0.514169
		0.86	0.485079	0.502561	0.561944	0.466621	0.449221	0.516398
		0.863333	0.488507	0.506236	0.567018	0.469607	0.453856	0.519522
		0.866667	0.490165	0.507699	0.571226	0.471158	0.456135	0.523216
		0.87	0.490722	0.511014	0.572498	0.472182	0.462947	0.527034
		0.873333	0.493898	0.51309	0.574993	0.475949	0.465274	0.531205
		0.876667	0.494934	0.515409	0.578012	0.478227	0.470977	0.534684
		0.88	0.495719	0.517193	0.578469	0.479099	0.473554	0.53786
		0.883333	0.498197	0.520002	0.581151	0.481625	0.477615	0.539733
		0.886667	0.50207	0.521727	0.585685	0.484101	0.478287	0.541529
		0.89	0.505689	0.5242	0.587607	0.484201	0.482777	0.544534
		0.893333	0.510883	0.527372	0.590866	0.485651	0.482981	0.546758
		0.896667	0.513842	0.530902	0.593491	0.489055	0.482888	0.548373
		0.9	0.51538	0.533527	0.594825	0.490947	0.48302	0.550729
		0.903333	0.517542	0.536832	0.599325	0.494408	0.485095	0.554184
		0.906667	0.519068	0.541725	0.604298	0.497808	0.488266	0.556871
		0.91	0.519432	0.543904	0.606728	0.502097	0.489002	0.559314
		0.913333	0.521432	0.545881	0.609	0.502687	0.492734	0.561441
		0.916667	0.525388	0.549014	0.613475	0.504758	0.493815	0.563012
		0.92	0.530253	0.551996	0.613517	0.505628	0.495492	0.565042
		0.923333	0.533809	0.554417	0.613817	0.509639	0.498209	0.565898
		0.926667	0.538574	0.556773	0.614841	0.509696	0.502469	0.569027
		0.93	0.542771	0.557629	0.617962	0.51379	0.50572	0.570288
		0.933333	0.546712	0.558973	0.618926	0.515074	0.509802	0.571015
		0.936667	0.547771	0.561103	0.62061	0.518462	0.51619	0.573605
		0.94	0.549686	0.562528	0.6239	0.518644	0.518381	0.575143
		0.943333	0.55164	0.564611	0.627929	0.520006	0.519509	0.575944
		0.946667	0.553322	0.567769	0.629573	0.521268	0.520312	0.58025
		0.95	0.553688	0.570226	0.631864	0.523126	0.523269	0.582619
		0.953333	0.55639	0.57249	0.633945	0.523446	0.523556	0.584731
		0.956667	0.556662	0.575676	0.635557	0.526835	0.52321	0.589121
		0.96	0.556228	0.578486	0.636455	0.531469	0.523076	0.592255
		0.963333	0.558283	0.583184	0.639365	0.533738	0.526327	0.591973
		0.966667	0.560804	0.584831	0.643343	0.537622	0.527758	0.594806
		0.97	0.559982	0.58793	0.64791	0.539136	0.527675	0.597244
		0.973333	0.562005	0.588516	0.652332	0.540257	0.530436	0.597723
		0.976667	0.566693	0.590587	0.655281	0.540123	0.533883	0.600444
		0.98	0.569002	0.590893	0.657588	0.542003	0.535319	0.60432
		0.983333	0.571245	0.593279	0.65736	0.542166	0.536321	0.606819
		0.986667	0.576922	0.595031	0.660266	0.546189	0.540345	0.607344
		0.99	0.580159	0.598435	0.660942	0.54652	0.542034	0.610455
		0.993333	0.581709	0.600553	0.663262	0.547739	0.543055	0.609297
		0.996667	0.583445	0.602723	0.664253	0.548923	0.546468	0.607066
		1	0.585804	0.606026	0.665059	0.551515	0.547958	0.61068
		1.00333	0.589758	0.608047	0.665947	0.552299	0.549516	0.611429
		1.00667	0.590706	0.608568	0.667169	0.553733	0.551601	0.612774
		1.01	0.594776	0.610748	0.667534	0.555754	0.553531	0.617725
		1.01333	0.598221	0.612367	0.668896	0.558251	0.552729	0.621263
		1.01667	0.600509	0.613139	0.671634	0.558587	0.55321	0.622791
		1.02	0.599454	0.614503	0.671627	0.561386	0.552711	0.621533
		1.02333	0.602569	0.618435	0.671916	0.56543	0.556762	0.621464
		1.02667	0.601506	0.619428	0.675987	0.567249	0.559968	0.620297
		1.03	0.600751	0.621907	0.677573	0.566586	0.562459	0.621177
		1.03333	0.602537	0.62386	0.679125	0.569691	0.565264	0.622299
		1.03667	0.607211	0.627291	0.682394	0.569094	0.569033	0.627542
		1.04	0.61062	0.627988	0.684096	0.570374	0.569815	0.632446
		1.04333	0.615451	0.630774	0.68509	0.573428	0.570666	0.635559
		1.04667	0.620418	0.634054	0.687875	0.577156	0.571877	0.639124
		1.05	0.623464	0.635782	0.690964	0.577885	0.573767	0.641832
		1.05333	0.623109	0.637629	0.692215	0.578611	0.575801	0.643855
		1.05667	0.624357	0.639227	0.694738	0.578865	0.574782	0.642401
		1.06	0.622517	0.640001	0.694743	0.579732	0.575328	0.643777
		1.06333	0.623591	0.640604	0.697938	0.579913	0.577215	0.642388
		1.06667	0.624571	0.643313	0.69884	0.58196	0.580318	0.641351
		1.07	0.628651	0.645651	0.700436	0.585327	0.582125	0.642389
		1.07333	0.627908	0.648307	0.702577	0.587526	0.584543	0.645281
		1.07667	0.631434	0.65004	0.70508	0.589518	0.587091	0.64807
		1.08	0.631582	0.65148	0.704589	0.591484	0.589507	0.651231
		1.08333	0.631397	0.65285	0.706147	0.59143	0.590456	0.654877
		1.08667	0.631485	0.65386	0.706119	0.591038	0.591117	0.65678
		1.09	0.635395	0.655126	0.708221	0.591112	0.592366	0.657068
		1.09333	0.637487	0.656512	0.710046	0.591757	0.592136	0.658164
		1.09667	0.64321	0.658725	0.711485	0.593588	0.592944	0.659872
		1.1	0.648488	0.662196	0.713505	0.595381	0.594347	0.65911
		1.10333	0.649878	0.665124	0.7164	0.598019	0.597252	0.661046
		1.10667	0.651167	0.666842	0.717653	0.600491	0.596118	0.663346
		1.11	0.650787	0.669511	0.718773	0.60142	0.598802	0.665443
		1.11333	0.647906	0.671394	0.720515	0.602129	0.600524	0.668465
		1.11667	0.646651	0.671435	0.721155	0.604425	0.600582	0.670963
		1.12	0.647002	0.672288	0.72358	0.605537	0.601522	0.673318
		1.12333	0.648081	0.673536	0.725083	0.606016	0.606112	0.676043
		1.12667	0.651089	0.676084	0.726826	0.606495	0.608134	0.676874
		1.13	0.652561	0.676168	0.729308	0.608299	0.609612	0.677803
		1.13333	0.653683	0.676787	0.730231	0.609526	0.61125	0.681224
		1.13667	0.655963	0.679334	0.731761	0.612091	0.613535	0.681908
		1.14	0.658101	0.680457	0.732858	0.614968	0.615852	0.684764
		1.14333	0.659168	0.681493	0.73446	0.616978	0.619648	0.685375
		1.14667	0.662374	0.684545	0.735779	0.61737	0.619119	0.687365
		1.15	0.665026	0.688029	0.736912	0.61795	0.618729	0.689346
		1.15333	0.666313	0.689329	0.737965	0.618788	0.620882	0.688523
		1.15667	0.667813	0.690474	0.740632	0.620975	0.621689	0.685868
		1.16	0.670954	0.691249	0.742818	0.621662	0.619725	0.688053
		1.16333	0.673734	0.693186	0.741962	0.624181	0.621551	0.68631
		1.16667	0.673849	0.693434	0.745302	0.625694	0.625847	0.684414
		1.17	0.678028	0.694633	0.747352	0.626759	0.627224	0.686803
		1.17333	0.680144	0.697086	0.746561	0.627076	0.627004	0.691514
		1.17667	0.681969	0.698916	0.74598	0.629792	0.628363	0.692479
		1.18	0.684667	0.699541	0.748253	0.629999	0.628727	0.698259
		1.18333	0.688945	0.701331	0.747976	0.631803	0.62943	0.702608
		1.18667	0.690755	0.703312	0.748029	0.633447	0.632536	0.704874
		1.19	0.692291	0.703994	0.748759	0.633046	0.636044	0.704986
		1.19333	0.693231	0.705645	0.750172	0.633795	0.637033	0.706611
		1.19667	0.693748	0.705626	0.752449	0.63271	0.638045	0.704455
		1.2	0.694322	0.707013	0.753214	0.634325	0.641189	0.703999
		1.20333	0.696518	0.708054	0.753968	0.634166	0.640595	0.705106
		1.20667	0.699992	0.709565	0.755534	0.634896	0.640518	0.706285
		1.21	0.702432	0.709506	0.756591	0.634608	0.643256	0.707379
		1.21333	0.702794	0.71248	0.756284	0.637464	0.64522	0.710065
		1.21667	0.703964	0.715056	0.757439	0.637247	0.644298	0.711507
		1.22	0.705923	0.717066	0.758776	0.639287	0.645789	0.713594
		1.22333	0.703761	0.719099	0.761546	0.641652	0.647855	0.715359
		1.22667	0.702975	0.722493	0.76299	0.644212	0.648124	0.71734
		1.23	0.703414	0.723798	0.764053	0.646968	0.651449	0.719687
		1.23333	0.703532	0.723131	0.765079	0.648268	0.655175	0.722161
		1.23667	0.703714	0.724722	0.765079	0.650049	0.656118	0.722026
		1.24	0.708376	0.726371	0.765832	0.653295	0.657853	0.724523
		1.24333	0.709576	0.727579	0.766856	0.654066	0.660294	0.723612
		1.24667	0.709329	0.729706	0.767484	0.65461	0.65888	0.723662
		1.25	0.709855	0.730919	0.769049	0.65783	0.657159	0.725395
		1.25333	0.710761	0.731301	0.771967	0.657713	0.657882	0.726001
		1.25667	0.710178	0.733062	0.772669	0.658007	0.657452	0.725841
		1.26	0.712629	0.732614	0.772802	0.659112	0.657993	0.727808
		1.26333	0.718486	0.734087	0.77496	0.66163	0.659594	0.728783
		1.26667	0.720878	0.73527	0.776702	0.660857	0.661354	0.730458
		1.27	0.720857	0.736115	0.77804	0.662535	0.664029	0.732646
		1.27333	0.722184	0.737276	0.780261	0.661956	0.6678	0.735785
		1.27667	0.721641	0.739943	0.782654	0.663258	0.670199	0.73757
		1.28	0.718483	0.74049	0.784362	0.662131	0.674635	0.738291
		1.28333	0.719238	0.742641	0.78524	0.664347	0.676771	0.740513
		1.28667	0.720395	0.744757	0.786411	0.66542	0.676025	0.740584
		1.29	0.720177	0.745927	0.786698	0.667888	0.673376	0.739837
		1.29333	0.720744	0.746144	0.786828	0.669413	0.672565	0.740635
		1.29667	0.724628	0.746806	0.78641	0.671134	0.670903	0.741355
		1.3	0.72703	0.748186	0.788439	0.672449	0.668535	0.73926
		1.30333	0.728902	0.749693	0.789597	0.673771	0.669667	0.742193
		1.30667	0.732815	0.750865	0.789139	0.674428	0.673614	0.743227
		1.31	0.73546	0.75225	0.790794	0.675595	0.676257	0.743952
		1.31333	0.736103	0.753214	0.792835	0.675678	0.677098	0.748871
		1.31667	0.736128	0.754638	0.792225	0.675145	0.678364	0.751249
		1.32	0.738673	0.754762	0.793405	0.67454	0.677643	0.749019
		1.32333	0.734259	0.755194	0.796504	0.673364	0.679007	0.74969
		1.32667	0.735235	0.757332	0.798383	0.673452	0.67969	0.749853
		1.33	0.736368	0.758377	0.799032	0.675154	0.682885	0.748024
		1.33333	0.736792	0.759293	0.799514	0.675245	0.687715	0.746601
		1.33667	0.736133	0.761039	0.799564	0.678249	0.690324	0.74889
		1.34	0.741016	0.762593	0.80016	0.680351	0.69227	0.749757
		1.34333	0.744474	0.762273	0.800558	0.682685	0.691983	0.750442
		1.34667	0.748368	0.763345	0.802238	0.683828	0.692409	0.749624
		1.35	0.750091	0.763145	0.803622	0.688232	0.691297	0.75346
		1.35333	0.752902	0.763819	0.803508	0.688739	0.690781	0.755187
		1.35667	0.754651	0.764353	0.805505	0.690304	0.690418	0.758138
		1.36	0.753854	0.765978	0.806759	0.689302	0.692115	0.76204
		1.36333	0.752901	0.767577	0.808072	0.691128	0.692412	0.764693
		1.36667	0.752684	0.769215	0.807503	0.690897	0.692394	0.765639
		1.37	0.752342	0.770916	0.81106	0.690512	0.693268	0.766409
		1.37333	0.75248	0.77149	0.811789	0.692097	0.694057	0.766455
		1.37667	0.754146	0.773048	0.811169	0.694465	0.695148	0.766209
		1.38	0.753659	0.772619	0.810683	0.694446	0.696145	0.76951
		1.38333	0.757502	0.774622	0.813807	0.693669	0.699867	0.769958
		1.38667	0.762011	0.776318	0.812824	0.69472	0.702469	0.772577
		1.39	0.763692	0.779006	0.811887	0.696356	0.703151	0.772507
		1.39333	0.764655	0.778589	0.814264	0.696632	0.703832	0.772659
		1.39667	0.765575	0.780934	0.815827	0.697263	0.702492	0.772661
		1.4	0.765706	0.781358	0.815864	0.698534	0.700306	0.775027
		1.40333	0.765421	0.781497	0.8173	0.699139	0.702475	0.773986
		1.40667	0.768846	0.781889	0.820043	0.699067	0.705176	0.773781
		1.41	0.77127	0.784186	0.82135	0.70218	0.706163	0.771874
		1.41333	0.774622	0.785359	0.821491	0.702067	0.709959	0.771629
		1.41667	0.7778	0.786819	0.822737	0.703525	0.714224	0.770539
		1.42	0.779253	0.788322	0.824486	0.705527	0.715377	0.772329
		1.42333	0.778237	0.789208	0.824614	0.705301	0.716656	0.773075
		1.42667	0.777222	0.789077	0.824992	0.70378	0.720015	0.778018
		1.43	0.775232	0.78901	0.827087	0.707237	0.721693	0.780511
		1.43333	0.776014	0.789915	0.828645	0.708717	0.720094	0.780946
		1.43667	0.777116	0.789982	0.828985	0.708501	0.718886	0.783634
		1.44	0.776174	0.791823	0.829018	0.710485	0.718504	0.78751
		1.44333	0.775341	0.793927	0.831097	0.712009	0.719076	0.787651
		1.44667	0.775686	0.795315	0.83079	0.71064	0.718949	0.788301
		1.45	0.773166	0.796205	0.830917	0.711296	0.722539	0.789012
		1.45333	0.770843	0.798179	0.829485	0.71319	0.722799	0.790027
		1.45667	0.77228	0.798018	0.831658	0.714066	0.725864	0.787634
		1.46	0.773575	0.799158	0.831656	0.715014	0.727635	0.790367
		1.46333	0.777028	0.800561	0.831734	0.715473	0.728782	0.791762
		1.46667	0.779322	0.799508	0.833216	0.716845	0.728698	0.791365
		1.47	0.782177	0.799935	0.836121	0.716728	0.731183	0.788513
		1.47333	0.785343	0.799626	0.836693	0.717516	0.727046	0.789882
		1.47667	0.787911	0.800435	0.836989	0.717066	0.727743	0.786896
		1.48	0.787522	0.801403	0.839605	0.718808	0.728285	0.786705
		1.48333	0.787281	0.803715	0.838695	0.717888	0.728969	0.788689
		1.48667	0.788134	0.804525	0.839518	0.718555	0.729762	0.791181
		1.49	0.792132	0.806935	0.83931	0.719876	0.73412	0.794257
		1.49333	0.79461	0.808189	0.839182	0.722039	0.731795	0.798599
		1.49667	0.796967	0.809013	0.839708	0.72367	0.732784	0.798391
		1.5	0.801135	0.810219	0.841504	0.725297	0.731558	0.799601
		1.50333	0.802213	0.811839	0.841633	0.726137	0.73352	0.801627
		1.50667	0.797493	0.812192	0.844	0.72665	0.734721	0.802503
		1.51	0.795192	0.811667	0.844809	0.727641	0.737783	0.80259
		1.51333	0.794635	0.812652	0.844188	0.727238	0.738319	0.803591
		1.51667	0.793064	0.812593	0.846084	0.729088	0.739304	0.803549
		1.52	0.794441	0.811846	0.846581	0.73024	0.738721	0.802629
		1.52333	0.799683	0.813202	0.846009	0.728825	0.73869	0.802961
		1.52667	0.804748	0.815448	0.845501	0.727001	0.734976	0.803089
		1.53	0.807374	0.816115	0.846902	0.729395	0.736392	0.805294
		1.53333	0.810117	0.817838	0.847461	0.729063	0.737081	0.807464
		1.53667	0.809981	0.819063	0.849057	0.730006	0.737572	0.808759
		1.54	0.810165	0.821115	0.850795	0.731821	0.737476	0.808731
		1.54333	0.806264	0.821291	0.853342	0.733533	0.741037	0.808653
		1.54667	0.805329	0.822866	0.853884	0.733364	0.738397	0.808184
		1.55	0.807738	0.822951	0.853327	0.73426	0.740744	0.808638
		1.55333	0.810679	0.824759	0.85321	0.735417	0.7422	0.809183
		1.55667	0.807998	0.824943	0.853764	0.737305	0.741842	0.808779
		1.56	0.810164	0.825339	0.855034	0.73917	0.742606	0.8094
		1.56333	0.812234	0.824517	0.856018	0.740486	0.746056	0.809982
		1.56667	0.810859	0.82528	0.856204	0.741187	0.747475	0.808624
		1.57	0.811347	0.825575	0.856713	0.740858	0.749542	0.809973
		1.57333	0.815284	0.826975	0.858343	0.741645	0.751884	0.811211
		1.57667	0.81886	0.828769	0.858014	0.740806	0.752144	0.811529
		1.58	0.818993	0.829369	0.859746	0.739924	0.752663	0.813195
		1.58333	0.820214	0.831241	0.861812	0.74164	0.753098	0.815856
		1.58667	0.81991	0.832759	0.861887	0.740699	0.749772	0.813762
		1.59	0.820396	0.832853	0.8623	0.73954	0.748396	0.812918
		1.59333	0.818695	0.832879	0.864057	0.740694	0.749236	0.815362
		1.59667	0.820753	0.834616	0.863702	0.74199	0.753814	0.815017
		1.6	0.821011	0.836432	0.862776	0.741786	0.753934	0.814982
		1.60333	0.823089	0.837001	0.864378	0.742625	0.754843	0.818718
		1.60667	0.82278	0.83805	0.865154	0.744969	0.758741	0.824066
		1.61	0.82591	0.83907	0.865223	0.747001	0.760151	0.823003
		1.61333	0.827616	0.839608	0.86634	0.747849	0.756504	0.82464
		1.61667	0.829008	0.839033	0.869938	0.74924	0.757573	0.827458
		1.62	0.827038	0.839109	0.871743	0.751815	0.762031	0.8272
		1.62333	0.827257	0.839909	0.872371	0.751238	0.764292	0.825498
		1.62667	0.828264	0.840657	0.873575	0.74949	0.76707	0.828576
		1.63	0.829176	0.842047	0.875079	0.748502	0.771612	0.829124
		1.63333	0.829311	0.842002	0.874633	0.748025	0.772701	0.828468
		1.63667	0.831292	0.842836	0.875125	0.749352	0.770778	0.828222
		1.64	0.83397	0.842634	0.876671	0.749788	0.771449	0.828735
		1.64333	0.831393	0.842708	0.875889	0.752077	0.771475	0.828063
		1.64667	0.832332	0.842729	0.87493	0.753987	0.769442	0.82756
		1.65	0.834127	0.843971	0.876267	0.755431	0.769276	0.828534
		1.65333	0.836667	0.843937	0.876704	0.755437	0.770441	0.830699
		1.65667	0.836129	0.845647	0.877065	0.755325	0.768326	0.829771
		1.66	0.839679	0.84716	0.878982	0.7547	0.765137	0.831135
		1.66333	0.838419	0.847731	0.879871	0.756816	0.76667	0.833555
		1.66667	0.839544	0.847913	0.879214	0.755604	0.767989	0.832282
		1.67	0.837835	0.850268	0.879611	0.75696	0.769624	0.829314
		1.67333	0.838791	0.850562	0.880097	0.759304	0.772071	0.829499
		1.67667	0.837703	0.849956	0.879196	0.762034	0.775126	0.828739
		1.68	0.839494	0.85009	0.87934	0.760902	0.775639	0.825319
		1.68333	0.838876	0.852151	0.880482	0.762028	0.776876	0.826288
		1.68667	0.839999	0.852586	0.881371	0.762699	0.776861	0.828025
		1.69	0.841153	0.852569	0.881006	0.762672	0.776775	0.83152
		1.69333	0.843317	0.853177	0.882423	0.761862	0.778431	0.833353
		1.69667	0.843667	0.8556	0.884039	0.761292	0.77598	0.835497
		1.7	0.843691	0.855133	0.884172	0.762509	0.777222	0.837485
		1.70333	0.841916	0.856997	0.883025	0.762877	0.777385	0.840236
		1.70667	0.84026	0.859228	0.883614	0.763411	0.773935	0.843138
		1.71	0.838459	0.86067	0.88531	0.762458	0.774962	0.843789
		1.71333	0.83771	0.860975	0.885775	0.76485	0.778433	0.844754
		1.71667	0.840108	0.861692	0.886309	0.766423	0.777175	0.84414
		1.72	0.842542	0.86171	0.88734	0.766844	0.777441	0.844319
		1.72333	0.844323	0.860686	0.888376	0.768134	0.782186	0.84108
		1.72667	0.845949	0.861352	0.887566	0.770943	0.779039	0.840392
		1.73	0.846656	0.861461	0.887634	0.771822	0.781099	0.84311
		1.73333	0.844693	0.86302	0.888661	0.771157	0.780585	0.846225
		1.73667	0.845328	0.862178	0.890316	0.770585	0.781137	0.845958
		1.74	0.848155	0.86448	0.89087	0.771096	0.779349	0.849113
		1.74333	0.85193	0.864858	0.892322	0.771179	0.7797	0.85229
		1.74667	0.853679	0.865528	0.891789	0.77195	0.778347	0.850236
		1.75	0.856055	0.864669	0.893971	0.771438	0.782753	0.848769
		1.75333	0.857556	0.867153	0.893491	0.774507	0.785352	0.849381
		1.75667	0.853856	0.866524	0.893787	0.77509	0.787234	0.847978
		1.76	0.850019	0.86667	0.893195	0.776494	0.790051	0.847227
		1.76333	0.849109	0.868585	0.895376	0.774461	0.791053	0.84803
		1.76667	0.847411	0.870159	0.894139	0.777385	0.791272	0.847949
		1.77	0.846912	0.868967	0.896167	0.774721	0.790954	0.849739
		1.77333	0.850515	0.870249	0.897504	0.773917	0.792122	0.851509
		1.77667	0.854284	0.872036	0.899765	0.775053	0.79329	0.852898
		1.78	0.856772	0.871449	0.898024	0.776661	0.792289	0.855166
		1.78333	0.859346	0.872605	0.898903	0.773972	0.789192	0.856773
		1.78667	0.858036	0.874183	0.898113	0.775544	0.789529	0.855188
		1.79	0.856214	0.87494	0.8976	0.776463	0.790278	0.854852
		1.79333	0.854248	0.875949	0.896188	0.775313	0.788045	0.853857
		1.79667	0.853069	0.875922	0.898275	0.777897	0.788165	0.853685
		1.8	0.855679	0.8759	0.897425	0.779665	0.789795	0.854286
		1.80333	0.860027	0.875435	0.898876	0.781213	0.790641	0.857843
		1.80667	0.862488	0.87666	0.89979	0.783641	0.788252	0.859375
		1.81	0.865214	0.875663	0.90021	0.78519	0.788897	0.859377
		1.81333	0.867024	0.876025	0.900913	0.784257	0.788932	0.859046
		1.81667	0.865794	0.877276	0.901684	0.785489	0.787786	0.858209
		1.82	0.866642	0.87964	0.902985	0.78572	0.786035	0.856892
		1.82333	0.86988	0.879748	0.90405	0.7838	0.789063	0.856416
		1.82667	0.868123	0.881768	0.904313	0.78262	0.791682	0.859103
		1.83	0.868334	0.883533	0.906223	0.785016	0.79383	0.86
		1.83333	0.870523	0.883869	0.907778	0.784578	0.796298	0.860871
		1.83667	0.870612	0.884057	0.906465	0.782949	0.796883	0.861385
		1.84	0.868611	0.884497	0.907508	0.785107	0.797857	0.862852
		1.84333	0.87026	0.885222	0.90982	0.788506	0.798023	0.861407
		1.84667	0.870539	0.88607	0.908194	0.786606	0.799044	0.862651
		1.85	0.867885	0.886161	0.908334	0.788469	0.797105	0.864072
		1.85333	0.866067	0.886221	0.908074	0.790946	0.79738	0.864078
		1.85667	0.870263	0.887484	0.908691	0.791271	0.799466	0.863726
		1.86	0.871678	0.888009	0.908864	0.790632	0.803387	0.865683
		1.86333	0.873648	0.887966	0.909967	0.792838	0.804433	0.865846
		1.86667	0.876022	0.888799	0.908603	0.791522	0.805731	0.865381
		1.87	0.878487	0.889558	0.911293	0.791721	0.809479	0.86561
		1.87333	0.877003	0.89066	0.911028	0.792838	0.807497	0.865081
		1.87667	0.879493	0.890608	0.911865	0.791091	0.806773	0.863658
		1.88	0.879837	0.891505	0.913067	0.79189	0.807941	0.865035
		1.88333	0.881282	0.892376	0.915554	0.794097	0.811807	0.865059
		1.88667	0.882837	0.891882	0.915118	0.793724	0.810933	0.867061
		1.89	0.882828	0.891909	0.914593	0.793142	0.812278	0.869457
		1.89333	0.880195	0.892801	0.91424	0.795144	0.810194	0.870363
		1.89667	0.878975	0.892961	0.914339	0.793545	0.81024	0.869717
		1.9	0.87889	0.893113	0.916173	0.79366	0.808404	0.873095
		1.90333	0.878295	0.894561	0.917089	0.795518	0.808655	0.869863
		1.90667	0.877644	0.894601	0.919315	0.795541	0.808301	0.868481
		1.91	0.878729	0.894212	0.920003	0.796645	0.810632	0.866848
		1.91333	0.878368	0.894167	0.92089	0.797663	0.811767	0.866909
		1.91667	0.879102	0.894024	0.919834	0.797792	0.815085	0.863906
		1.92	0.878265	0.894312	0.920183	0.798318	0.817814	0.864575
		1.92333	0.879617	0.895308	0.919541	0.799897	0.821414	0.866563
		1.92667	0.880511	0.897457	0.921368	0.800317	0.820099	0.868438
		1.93	0.881413	0.899144	0.922211	0.799393	0.821782	0.869531
		1.93333	0.880051	0.901209	0.921717	0.799474	0.820983	0.872155
		1.93667	0.880636	0.901678	0.92207	0.799972	0.818805	0.873218
		1.94	0.881846	0.902342	0.923723	0.800031	0.81568	0.873132
		1.94333	0.882692	0.902558	0.925531	0.799039	0.816308	0.873782
		1.94667	0.884951	0.901787	0.92658	0.801547	0.812537	0.873294
		1.95	0.886844	0.901575	0.92735	0.804455	0.811529	0.874166
		1.95333	0.888647	0.902164	0.926666	0.804351	0.812531	0.873614
		1.95667	0.891369	0.902446	0.926307	0.805626	0.816286	0.872644
		1.96	0.892107	0.902434	0.924549	0.806943	0.818626	0.873878
		1.96333	0.892565	0.902632	0.924063	0.806653	0.820047	0.874631
		1.96667	0.893492	0.902479	0.923657	0.804739	0.81809	0.874735
		1.97	0.894052	0.903677	0.925313	0.805034	0.81906	0.878132
		1.97333	0.893244	0.90346	0.925441	0.803127	0.819252	0.881944
		1.97667	0.893702	0.90369	0.924025	0.803402	0.816232	0.882858
		1.98	0.893855	0.904359	0.925489	0.805298	0.816071	0.885149
		1.98333	0.895878	0.9049	0.926869	0.807337	0.820337	0.887592
		1.98667	0.8972	0.904116	0.926392	0.808269	0.819591	0.886449
		1.99	0.898584	0.905482	0.927106	0.808247	0.818452	0.884668
		1.99333	0.898455	0.905173	0.930799	0.807504	0.822881	0.885684
		1.99667	0.899224	0.90704	0.929486	0.807564	0.825214	0.883091
		2	0.89761	0.907475	0.931537	0.808032	0.823305	0.882681
		2.00333	0.89774	0.908039	0.933674	0.806473	0.823769	0.883987
		2.00667	0.895095	0.908369	0.933326	0.807491	0.822799	0.883903
		2.01	0.893375	0.909771	0.933138	0.808602	0.820568	0.883657
		2.01333	0.89272	0.909165	0.934241	0.807883	0.818499	0.885519
		2.01667	0.896258	0.909941	0.933976	0.808047	0.820059	0.885618
		2.02	0.89295	0.910166	0.932587	0.810752	0.821273	0.885904
		2.02333	0.897285	0.911211	0.933747	0.812347	0.823243	0.885823
		2.02667	0.899628	0.911126	0.933288	0.813962	0.824927	0.883359
		2.03	0.901086	0.911711	0.934048	0.813486	0.828557	0.882989
		2.03333	0.897516	0.91229	0.933032	0.814034	0.829056	0.88118
		2.03667	0.901293	0.913199	0.933183	0.812264	0.831941	0.879388
		2.04	0.901511	0.912434	0.934299	0.81166	0.832254	0.8805
		2.04333	0.902427	0.914099	0.933106	0.811993	0.834082	0.882565
		2.04667	0.904598	0.915449	0.932913	0.813613	0.834194	0.881614
		2.05	0.904774	0.91493	0.932875	0.81326	0.834846	0.882381
		2.05333	0.905556	0.916894	0.934348	0.814263	0.834717	0.885289
		2.05667	0.90558	0.91657	0.934359	0.817514	0.835917	0.888116
		2.06	0.906927	0.915678	0.936032	0.816532	0.834599	0.890164
		2.06333	0.90698	0.916135	0.935656	0.817665	0.834543	0.891938
		2.06667	0.908336	0.917805	0.936895	0.81827	0.837335	0.893508
		2.07	0.909257	0.916761	0.936665	0.819914	0.837196	0.89251
		2.07333	0.907419	0.918484	0.937066	0.819436	0.837084	0.89149
		2.07667	0.909984	0.919993	0.938367	0.821645	0.836148	0.887766
		2.08	0.904513	0.919206	0.938598	0.820485	0.836627	0.886903
		2.08333	0.908986	0.92013	0.93887	0.820897	0.835786	0.886643
		2.08667	0.907098	0.921058	0.940719	0.820311	0.836953	0.885956
		2.09	0.908321	0.920959	0.942005	0.820248	0.838378	0.887235
		2.09333	0.906448	0.92023	0.941905	0.820123	0.839574	0.890081
		2.09667	0.910495	0.921949	0.943854	0.822365	0.842238	0.892305
		2.1	0.9079	0.920963	0.944797	0.822606	0.840785	0.89437
		2.10333	0.910989	0.921167	0.944471	0.824066	0.840838	0.896285
		2.10667	0.910176	0.921169	0.942071	0.823105	0.842816	0.895307
		2.11	0.910115	0.921939	0.943166	0.822697	0.84396	0.896159
		2.11333	0.911626	0.920417	0.942089	0.821551	0.842957	0.898411
		2.11667	0.910289	0.921551	0.942406	0.821949	0.844149	0.897691
		2.12	0.909579	0.920807	0.942777	0.821737	0.841315	0.900281
		2.12333	0.911716	0.921652	0.944397	0.822734	0.839148	0.901838
		2.12667	0.912643	0.922371	0.943777	0.822778	0.841622	0.902017
		2.13	0.913524	0.924391	0.943516	0.823743	0.84011	0.900461
		2.13333	0.91648	0.924384	0.943607	0.823081	0.839861	0.900563
		2.13667	0.91647	0.926485	0.944193	0.823167	0.844291	0.899916
		2.14	0.917601	0.92747	0.94564	0.82493	0.845063	0.898918
		2.14333	0.917522	0.927864	0.947008	0.824912	0.845381	0.900036
		2.14667	0.918169	0.927753	0.948525	0.823264	0.844048	0.8986
		2.15	0.91707	0.928562	0.950145	0.82426	0.843959	0.897994
		2.15333	0.918679	0.929377	0.949686	0.825243	0.842335	0.897365
		2.15667	0.91811	0.929314	0.948335	0.824691	0.844142	0.89707
		2.16	0.919393	0.928697	0.946135	0.825568	0.84399	0.895982
		2.16333	0.918849	0.929153	0.948296	0.829025	0.845538	0.897629
		2.16667	0.919863	0.928604	0.946897	0.829338	0.848807	0.897757
		2.17	0.920379	0.927652	0.946599	0.830978	0.8494	0.895819
		2.17333	0.92128	0.927167	0.947985	0.831007	0.848503	0.89708
		2.17667	0.921639	0.928113	0.950085	0.833054	0.849596	0.896869
		2.18	0.921652	0.928266	0.949869	0.83161	0.850923	0.895212
		2.18333	0.920848	0.929766	0.949119	0.831197	0.850575	0.896726
		2.18667	0.921658	0.930837	0.950451	0.831411	0.847928	0.898293
		2.19	0.922438	0.932602	0.950309	0.832533	0.845288	0.89822
		2.19333	0.921113	0.933626	0.9508	0.831543	0.846714	0.898565
		2.19667	0.922091	0.93432	0.950957	0.831984	0.846344	0.901403
		2.2	0.924415	0.933437	0.952042	0.831499	0.848463	0.901017
		2.20333	0.923833	0.933667	0.952323	0.831601	0.855038	0.902569
		2.20667	0.923573	0.934623	0.953899	0.831461	0.858415	0.903355
		2.21	0.924178	0.933446	0.954884	0.832302	0.857812	0.905675
		2.21333	0.925468	0.933699	0.954924	0.83282	0.859723	0.906216
		2.21667	0.926002	0.936087	0.957573	0.835995	0.857692	0.907737
		2.22	0.927046	0.936287	0.956228	0.835777	0.855984	0.907107
		2.22333	0.927843	0.935702	0.955712	0.837124	0.857344	0.907441
		2.22667	0.928611	0.938447	0.956012	0.837065	0.858824	0.905129
		2.23	0.927241	0.938657	0.956389	0.83742	0.859317	0.906362
		2.23333	0.925531	0.937474	0.955495	0.837445	0.861302	0.906418
		2.23667	0.924495	0.936884	0.958574	0.837921	0.862027	0.907808
		2.24	0.924293	0.937375	0.957778	0.837331	0.862364	0.907636
		2.24333	0.92558	0.937131	0.957632	0.837856	0.860158	0.908648
		2.24667	0.927059	0.937528	0.957334	0.837758	0.858476	0.91018
		2.25	0.927798	0.938205	0.957768	0.839236	0.854004	0.909783
		2.25333	0.928179	0.939411	0.957626	0.840483	0.851986	0.909174
		2.25667	0.929959	0.940254	0.957332	0.839708	0.851378	0.90868
		2.26	0.930239	0.941063	0.958309	0.83988	0.852965	0.909358
		2.26333	0.93028	0.941989	0.959045	0.841588	0.854061	0.906238
		2.26667	0.929725	0.942802	0.958961	0.841046	0.858717	0.906357
		2.27	0.931866	0.942123	0.959472	0.83772	0.86216	0.907879
		2.27333	0.93128	0.942258	0.961112	0.840062	0.863784	0.909859
		2.27667	0.931987	0.941927	0.962196	0.837954	0.862507	0.910087
		2.28	0.930707	0.941282	0.961856	0.83764	0.859007	0.911975
		2.28333	0.933245	0.941782	0.962201	0.83733	0.859464	0.914216
		2.28667	0.932859	0.944159	0.96118	0.840763	0.856211	0.91543
		2.29	0.934212	0.944802	0.960841	0.840194	0.853598	0.915289
		2.29333	0.933431	0.945309	0.959017	0.844428	0.854949	0.915343
		2.29667	0.934261	0.947153	0.960347	0.845904	0.859093	0.916213
		2.3	0.933782	0.946199	0.962513	0.84632	0.859168	0.916545
		2.30333	0.935193	0.945979	0.963611	0.845252	0.864616	0.916738
		2.30667	0.9335	0.946899	0.963852	0.844251	0.864886	0.91663
		2.31	0.936032	0.948054	0.96445	0.843085	0.861655	0.919226
		2.31333	0.936882	0.946816	0.964323	0.840714	0.862014	0.91816
		2.31667	0.935275	0.947691	0.9625	0.841009	0.861079	0.917331
		2.32	0.935987	0.946776	0.964212	0.841749	0.85713	0.918224
		2.32333	0.93621	0.946524	0.964913	0.844328	0.861681	0.91978
		2.32667	0.934678	0.944741	0.96663	0.843628	0.863832	0.920131
		2.33	0.93449	0.945788	0.96664	0.847381	0.863612	0.921344
		2.33333	0.934772	0.94624	0.967455	0.847136	0.865616	0.924607
		2.33667	0.932761	0.947634	0.966009	0.846224	0.865956	0.924437
		2.34	0.933907	0.947177	0.966109	0.846781	0.862699	0.925385
		2.34333	0.934675	0.94799	0.965352	0.847987	0.864954	0.924615
		2.34667	0.937678	0.949084	0.96554	0.846603	0.865426	0.924286
		2.35	0.938005	0.948541	0.965644	0.846319	0.865412	0.922816
		2.35333	0.940323	0.949362	0.967146	0.849758	0.868856	0.922616
		2.35667	0.941177	0.950329	0.969462	0.847609	0.87098	0.921619
		2.36	0.94095	0.951517	0.968517	0.84842	0.871514	0.921591
		2.36333	0.940955	0.951878	0.967889	0.848749	0.87512	0.922044
		2.36667	0.942992	0.953726	0.967775	0.848413	0.874053	0.921429
		2.37	0.94182	0.953205	0.966138	0.847708	0.870143	0.921651
		2.37333	0.939705	0.952918	0.96533	0.850041	0.87039	0.921271
		2.37667	0.940563	0.953654	0.964827	0.850079	0.871524	0.922331
		2.38	0.938415	0.953871	0.96851	0.849254	0.870126	0.922679
		2.38333	0.938284	0.954007	0.96829	0.851985	0.8728	0.923521
		2.38667	0.940896	0.954101	0.969885	0.85223	0.877411	0.921931
		2.39	0.944493	0.954832	0.971564	0.852516	0.877212	0.924467
		2.39333	0.946331	0.956501	0.973241	0.851901	0.875031	0.924633
		2.39667	0.947664	0.955974	0.971931	0.853948	0.872553	0.92542
		2.4	0.949739	0.956332	0.973311	0.853365	0.873198	0.926161
		2.40333	0.948653	0.957441	0.974195	0.853047	0.869987	0.927309
		2.40667	0.94866	0.957393	0.973051	0.85227	0.870299	0.926236
		2.41	0.947983	0.956045	0.973626	0.853568	0.873457	0.926238
		2.41333	0.950531	0.956142	0.97221	0.852636	0.874961	0.927147
		2.41667	0.951634	0.955481	0.971982	0.852553	0.874776	0.927323
		2.42	0.952496	0.955182	0.971243	0.852969	0.876844	0.928223
		2.42333	0.95359	0.955553	0.971509	0.853209	0.877931	0.927865
		2.42667	0.953324	0.956717	0.973771	0.853501	0.87745	0.927853
		2.43	0.950142	0.958071	0.974936	0.854675	0.878662	0.927394
		2.43333	0.948697	0.958948	0.976214	0.85559	0.876803	0.92537
		2.43667	0.947742	0.958783	0.977324	0.85555	0.87743	0.925423
		2.44	0.946612	0.959522	0.976463	0.857561	0.87808	0.926784
		2.44333	0.947278	0.958622	0.975564	0.855404	0.878584	0.927473
		2.44667	0.949459	0.958851	0.975057	0.855437	0.878414	0.926118
		2.45	0.948651	0.95888	0.973687	0.854951	0.878673	0.927054
		2.45333	0.94732	0.960096	0.974062	0.854922	0.876354	0.928073
		2.45667	0.947593	0.959934	0.975506	0.855279	0.875327	0.926117
		2.46	0.945892	0.960855	0.974685	0.857539	0.87683	0.92694
		2.46333	0.946541	0.960293	0.976112	0.858813	0.87887	0.927251
		2.46667	0.949392	0.961598	0.976218	0.859708	0.880246	0.92715
		2.47	0.952595	0.960409	0.975261	0.860042	0.884313	0.926709
		2.47333	0.95336	0.96119	0.975399	0.857591	0.884607	0.926854
		2.47667	0.956145	0.961377	0.976866	0.858201	0.883705	0.925009
		2.48	0.956456	0.961397	0.975425	0.859113	0.881648	0.927018
		2.48333	0.957556	0.962065	0.977416	0.859059	0.87898	0.926119
		2.48667	0.957857	0.96367	0.977235	0.858869	0.877673	0.925579
		2.49	0.956779	0.963942	0.97768	0.860277	0.880177	0.927111
		2.49333	0.95988	0.964502	0.978141	0.859805	0.880045	0.926171
		2.49667	0.961436	0.965909	0.980115	0.857243	0.882471	0.925174
		2.5	0.959172	0.965675	0.978966	0.856853	0.888104	0.927501
		2.50333	0.958199	0.965973	0.980082	0.858673	0.889257	0.927098
		2.50667	0.960537	0.96666	0.978934	0.858497	0.889511	0.927153
		2.51	0.958287	0.966746	0.979816	0.859807	0.886801	0.931347
		2.51333	0.959168	0.965751	0.977405	0.860743	0.886699	0.932724
		2.51667	0.96033	0.965069	0.97652	0.864671	0.88488	0.930821
		2.52	0.960518	0.965782	0.97679	0.864428	0.883406	0.931457
		2.52333	0.958825	0.964292	0.978123	0.865002	0.881836	0.930099
		2.52667	0.958905	0.965177	0.976174	0.864427	0.885235	0.928964
		2.53	0.9577	0.965643	0.978712	0.865708	0.884752	0.928129
		2.53333	0.959002	0.966031	0.980734	0.863004	0.884356	0.927369
		2.53667	0.959341	0.966294	0.979782	0.861678	0.885635	0.928738
		2.54	0.962221	0.967509	0.980351	0.861902	0.887935	0.929911
		2.54333	0.962475	0.96705	0.98298	0.862954	0.889289	0.92694
		2.54667	0.962742	0.968263	0.982429	0.86202	0.891551	0.926935
		2.55	0.963246	0.968297	0.982193	0.862598	0.89343	0.92935
		2.55333	0.965543	0.968388	0.983612	0.862355	0.894505	0.930472
		2.55667	0.965836	0.96882	0.983905	0.86223	0.892146	0.930938
		2.56	0.966093	0.969028	0.982317	0.86286	0.892416	0.9333
		2.56333	0.967939	0.968978	0.981882	0.863882	0.892048	0.93638
		2.56667	0.969466	0.971086	0.981644	0.864135	0.892905	0.937158
		2.57	0.968475	0.97112	0.980384	0.866025	0.893424	0.934747
		2.57333	0.967977	0.972203	0.981622	0.867289	0.895175	0.936185
		2.57667	0.968865	0.973005	0.982177	0.867353	0.896433	0.938519
		2.58	0.968988	0.972318	0.984831	0.867629	0.89633	0.937754
		2.58333	0.967054	0.970371	0.985825	0.868296	0.896765	0.937831
		2.58667	0.968376	0.969832	0.988056	0.868494	0.897138	0.939113
		2.59	0.968109	0.97048	0.987353	0.868193	0.898311	0.939306
		2.59333	0.967986	0.970754	0.987615	0.867095	0.89617	0.939912
		2.59667	0.968777	0.972254	0.985673	0.868364	0.898025	0.940967
		2.6	0.968735	0.973714	0.985717	0.867865	0.897335	0.942213
		2.60333	0.967443	0.974699	0.986594	0.868257	0.896025	0.945387
		2.60667	0.968339	0.974826	0.987237	0.869244	0.895596	0.945535
		2.61	0.971694	0.975271	0.988351	0.869221	0.896375	0.943333
		2.61333	0.971709	0.975167	0.990439	0.868879	0.890133	0.942941
		2.61667	0.973676	0.974911	0.991749	0.86963	0.890604	0.940178
		2.62	0.975443	0.974816	0.989979	0.868933	0.895197	0.936998
		2.62333	0.975387	0.973745	0.99018	0.867855	0.891594	0.935824
		2.62667	0.971192	0.974336	0.989119	0.868855	0.89404	0.935504
		2.63	0.970184	0.972818	0.98631	0.869099	0.901402	0.936125
		2.63333	0.968853	0.973771	0.984849	0.869669	0.903751	0.938104
		2.63667	0.97032	0.97445	0.985167	0.870774	0.903037	0.940017
		2.64	0.973136	0.97503	0.984985	0.872057	0.907815	0.943876
		2.64333	0.976756	0.975702	0.983425	0.873159	0.906387	0.945531
		2.64667	0.977908	0.977718	0.985731	0.872148	0.906032	0.944209
		2.65	0.979336	0.977288	0.98781	0.871776	0.902462	0.944113
		2.65333	0.979126	0.977305	0.988681	0.872248	0.899036	0.942767
		2.65667	0.977367	0.97762	0.987828	0.872904	0.899534	0.941206
		2.66	0.976763	0.976713	0.990161	0.871249	0.897345	0.939653
		2.66333	0.976386	0.976843	0.990528	0.872219	0.8973	0.939522
		2.66667	0.976804	0.976499	0.990636	0.872696	0.898354	0.939432
		2.67	0.979076	0.97673	0.991746	0.873428	0.900934	0.9394
		2.67333	0.980965	0.976618	0.992051	0.872915	0.89967	0.939414
		2.67667	0.982778	0.977501	0.990752	0.873462	0.904394	0.942382
		2.68	0.98153	0.978007	0.993385	0.874872	0.904361	0.943604
		2.68333	0.981492	0.979427	0.992611	0.875074	0.907171	0.944829
		2.68667	0.977362	0.980049	0.991068	0.875096	0.907625	0.9454
		2.69	0.976257	0.981259	0.991772	0.876183	0.909425	0.946119
		2.69333	0.974983	0.980765	0.993036	0.877648	0.906004	0.945009
		2.69667	0.979359	0.980663	0.989496	0.878809	0.906782	0.945839
		2.7	0.980676	0.980402	0.990374	0.877757	0.905918	0.946233
		2.70333	0.983342	0.981437	0.991845	0.878327	0.906722	0.949209
		2.70667	0.98424	0.980369	0.992262	0.8782	0.90856	0.947967
		2.71	0.984891	0.981292	0.993747	0.875957	0.910004	0.948622
		2.71333	0.981335	0.981269	0.994297	0.87621	0.909584	0.947891
		2.71667	0.981166	0.982221	0.993729	0.877347	0.909032	0.947335
		2.72	0.980645	0.982605	0.994823	0.877338	0.908918	0.946108
		2.72333	0.981052	0.983314	0.994279	0.877221	0.906173	0.948127
		2.72667	0.982716	0.984074	0.994425	0.879909	0.906	0.947476
		2.73	0.98658	0.98505	0.996571	0.878143	0.907523	0.948137
		2.73333	0.987238	0.984933	0.995741	0.877388	0.909183	0.949929
		2.73667	0.988863	0.984899	0.994862	0.876341	0.90868	0.947897
		2.74	0.988693	0.985657	0.995153	0.877151	0.910092	0.947201
		2.74333	0.985927	0.984541	0.993262	0.876201	0.912324	0.946108
		2.74667	0.98275	0.985237	0.992494	0.875094	0.912919	0.945223
		2.75	0.979853	0.986131	0.994711	0.87733	0.912349	0.942252
		2.75333	0.97812	0.984908	0.994382	0.87882	0.910036	0.943066
		2.75667	0.980394	0.983864	0.995071	0.878643	0.911332	0.941619
		2.76	0.983312	0.98441	0.997494	0.878884	0.912771	0.940415
		2.76333	0.985865	0.983668	0.997193	0.881202	0.910968	0.939731
		2.76667	0.987857	0.983873	0.996874	0.881689	0.912037	0.940761
		2.77	0.987657	0.984656	0.997413	0.881898	0.916746	0.942532
		2.77333	0.986571	0.9867	0.997051	0.882816	0.917047	0.943794
		2.77667	0.986042	0.986416	0.994651	0.883188	0.915806	0.948093
		2.78	0.985402	0.986759	0.997884	0.883018	0.916742	0.949246
		2.78333	0.985459	0.98679	0.998514	0.881239	0.915306	0.949928
		2.78667	0.987474	0.987092	0.999569	0.881052	0.914472	0.948559
		2.79	0.987083	0.98714	1.00179	0.880772	0.913638	0.948515
		2.79333	0.987969	0.98757	1.00479	0.880857	0.911624	0.946778
		2.79667	0.987898	0.988051	1.00217	0.879821	0.911061	0.948736
		2.8	0.989567	0.988954	1.00083	0.879323	0.913699	0.94917
		2.80333	0.989484	0.98956	1.00042	0.880956	0.912777	0.952574
		2.80667	0.99009	0.989185	0.99934	0.881304	0.911673	0.953202
		2.81	0.988657	0.990161	0.998481	0.881824	0.914462	0.956461
		2.81333	0.990857	0.989873	0.999459	0.884458	0.916605	0.955697
		2.81667	0.990161	0.988857	0.999208	0.885381	0.914163	0.95356
		2.82	0.990651	0.988513	0.999605	0.882649	0.91803	0.949827
		2.82333	0.98885	0.988624	0.998787	0.88271	0.918676	0.948791
		2.82667	0.991328	0.987785	0.999579	0.883609	0.917625	0.947177
		2.83	0.988689	0.987964	1.00089	0.883786	0.917756	0.946664
		2.83333	0.988444	0.987832	1.00346	0.885783	0.918153	0.94898
		2.83667	0.986608	0.989327	1.00367	0.886609	0.916646	0.952457
		2.84	0.986557	0.989969	1.00392	0.888417	0.917833	0.953917
		2.84333	0.984222	0.990092	1.00325	0.88769	0.920215	0.953391
		2.84667	0.986516	0.991098	1.00292	0.886031	0.919127	0.953766
		2.85	0.988316	0.991827	1.00264	0.885854	0.922694	0.953371
		2.85333	0.989622	0.990785	1.00284	0.886634	0.920974	0.951271
		2.85667	0.99179	0.990296	1.00482	0.884855	0.922508	0.951499
		2.86	0.993171	0.992478	1.00531	0.886295	0.920754	0.952482
		2.86333	0.99425	0.992395	1.00406	0.886724	0.922089	0.953806
		2.86667	0.994672	0.992561	1.00506	0.886568	0.918377	0.956922
		2.87	0.994521	0.992758	1.00557	0.887774	0.918528	0.95764
		2.87333	0.995945	0.994553	1.00422	0.88745	0.917116	0.957869
		2.87667	0.997998	0.993848	1.00458	0.886839	0.917753	0.957805
		2.88	0.997837	0.994364	1.0068	0.888182	0.919274	0.957707
		2.88333	0.998129	0.99422	1.00623	0.886844	0.921544	0.956298
		2.88667	0.999727	0.994704	1.0059	0.886812	0.924249	0.956935
		2.89	0.99992	0.992981	1.00679	0.887121	0.925512	0.956576
		2.89333	0.998048	0.992334	1.00672	0.887589	0.925706	0.957106
		2.89667	0.998931	0.992935	1.00588	0.887081	0.923956	0.956572
		2.9	0.998766	0.994344	1.0045	0.886775	0.924119	0.956798
		2.90333	0.999418	0.994901	1.00439	0.886442	0.922402	0.954943
		2.90667	1.00007	0.995254	1.00577	0.887727	0.921545	0.956541
		2.91	1.00153	0.996072	1.00653	0.88723	0.924476	0.957442
		2.91333	1.00191	0.995006	1.00714	0.889282	0.924717	0.958954
		2.91667	1.00234	0.993841	1.00898	0.890862	0.924775	0.958686
		2.92	1.00356	0.992973	1.00919	0.891576	0.925273	0.959979
		2.92333	1.00225	0.993465	1.00647	0.891478	0.926564	0.959652
		2.92667	1.00129	0.993861	1.00731	0.891513	0.924422	0.958537
		2.93	1.00086	0.993613	1.00712	0.890013	0.926357	0.957928
		2.93333	1.00219	0.99442	1.00566	0.890981	0.92718	0.958555
		2.93667	1.00242	0.995075	1.00597	0.890992	0.927887	0.959594
		2.94	1.00404	0.996052	1.00769	0.89051	0.928212	0.959146
		2.94333	1.00689	0.995971	1.00618	0.892648	0.930176	0.957208
		2.94667	1.00762	0.996916	1.00717	0.893091	0.927985	0.956645
		2.95	1.00592	0.99684	1.009	0.891635	0.929201	0.956701
		2.95333	1.005	0.996116	1.0079	0.891353	0.927217	0.955418
		2.95667	1.00352	0.995369	1.00774	0.891755	0.927326	0.955311
		2.96	1.00217	0.995643	1.0075	0.889397	0.925384	0.957132
		2.96333	1.0024	0.996159	1.00631	0.889012	0.927841	0.959025
		2.96667	1.00404	0.997129	1.00645	0.889895	0.925194	0.957757
		2.97	1.00508	0.998699	1.00817	0.890473	0.928844	0.959236
		2.97333	1.00637	0.999773	1.00915	0.889605	0.930159	0.95851
		2.97667	1.00782	1.00063	1.01063	0.889937	0.932118	0.961692
		2.98	1.00803	0.999799	1.0121	0.890021	0.931908	0.961486
		2.98333	1.00645	0.998236	1.01291	0.889459	0.935304	0.963408
		2.98667	1.00545	0.997733	1.01427	0.889393	0.932187	0.963332
		2.99	1.007	0.997082	1.0138	0.890976	0.932294	0.965441
		2.99333	1.00608	0.997482	1.01276	0.891188	0.931445	0.962791
		2.99667	1.00694	0.998895	1.01208	0.892859	0.932084	0.960944
		3	1.0084	1.00044	1.01097	0.893843	0.931415	0.959673
		3.00333	1.0096	1.00079	1.01009	0.894472	0.934435	0.958796
		3.00667	1.00951	1.00176	1.01019	0.893503	0.934378	0.956633
		3.01	1.00878	1.00208	1.01055	0.894266	0.93578	0.955938
		3.01333	1.00881	1.00213	1.01025	0.892135	0.936155	0.958004
		3.01667	1.00895	1.00218	1.00988	0.891846	0.934965	0.957175
		3.02	1.01033	1.00306	1.01053	0.890729	0.936606	0.95757
		3.02333	1.00924	1.00261	1.00961	0.892129	0.935589	0.958815
		3.02667	1.00854	1.00187	1.01095	0.892318	0.935295	0.959219
		3.03	1.00814	1.00183	1.01184	0.894219	0.934759	0.957312
		3.03333	1.00924	1.00187	1.01266	0.893608	0.935772	0.960145
		3.03667	1.0091	1.00104	1.01243	0.8945	0.933689	0.960597
		3.04	1.01091	1.00164	1.01247	0.893485	0.935301	0.962124
		3.04333	1.01077	1.00195	1.01117	0.895113	0.934891	0.962321
		3.04667	1.00859	1.00254	1.00999	0.894388	0.934113	0.964379
		3.05	1.0053	1.0033	1.01072	0.896082	0.934603	0.960939
		3.05333	1.00307	1.0043	1.01049	0.897561	0.936386	0.960809
		3.05667	1.00282	1.00429	1.01215	0.898278	0.93511	0.959573
		3.06	1.00572	1.00543	1.01303	0.897297	0.935968	0.959836
		3.06333	1.00822	1.00535	1.01416	0.89769	0.936921	0.9567
		3.06667	1.01031	1.00473	1.01411	0.898885	0.937757	0.958454
		3.07	1.01123	1.00516	1.0139	0.898991	0.937714	0.958138
		3.07333	1.01132	1.00623	1.01566	0.898688	0.939241	0.959313
		3.07667	1.01066	1.00611	1.01696	0.898677	0.938091	0.960531
		3.08	1.01027	1.00603	1.01824	0.900059	0.938397	0.960799
		3.08333	1.00855	1.00781	1.01703	0.899896	0.939942	0.961603
		3.08667	1.00809	1.0074	1.01653	0.89941	0.938514	0.962797
		3.09	1.0081	1.00727	1.01629	0.900873	0.938714	0.95965
		3.09333	1.00873	1.00675	1.01489	0.899435	0.939941	0.958239
		3.09667	1.00783	1.00756	1.01406	0.897458	0.941091	0.959919
		3.1	1.01274	1.00546	1.01432	0.896795	0.93744	0.957489
		3.10333	1.01509	1.00512	1.01503	0.898513	0.937774	0.957451
		3.10667	1.01581	1.00442	1.01556	0.897625	0.937436	0.959269
		3.11	1.01454	1.00384	1.01578	0.899701	0.938648	0.960707
		3.11333	1.01706	1.00342	1.01518	0.899234	0.937841	0.96036
		3.11667	1.01607	1.00484	1.01797	0.901615	0.938459	0.962173
		3.12	1.01624	1.00401	1.01946	0.900044	0.939907	0.962832
		3.12333	1.01648	1.00297	1.01778	0.899083	0.941207	0.961512
		3.12667	1.01846	1.00382	1.0177	0.899821	0.940664	0.959146
		3.13	1.01784	1.00564	1.01668	0.900126	0.941145	0.959888
		3.13333	1.01842	1.00548	1.01455	0.899559	0.941604	0.960084
		3.13667	1.0176	1.00659	1.0151	0.90022	0.94052	0.959055
		3.14	1.01774	1.00773	1.015	0.902454	0.94021	0.960056
		3.14333	1.01785	1.00745	1.01626	0.903195	0.938777	0.963581
		3.14667	1.01845	1.00501	1.01863	0.903226	0.939942	0.964504
		3.15	1.01841	1.00558	1.0212	0.903142	0.942664	0.96456
		3.15333	1.01954	1.00724	1.01986	0.902666	0.942719	0.967027
		3.15667	1.01974	1.00754	1.02033	0.901914	0.944404	0.967646
		3.16	1.01909	1.00918	1.02185	0.902023	0.946266	0.966691
		3.16333	1.01894	1.01099	1.02143	0.903892	0.946505	0.966587
		3.16667	1.02061	1.01105	1.01933	0.903522	0.945207	0.968552
		3.17	1.01999	1.01074	1.01848	0.902443	0.946567	0.968899
		3.17333	1.02142	1.01049	1.01998	0.901944	0.944313	0.970521
		3.17667	1.02284	1.0107	1.0175	0.901651	0.943337	0.971771
		3.18	1.02218	1.0107	1.01888	0.900882	0.941203	0.972541
		3.18333	1.02154	1.01113	1.01888	0.90036	0.93933	0.97127
		3.18667	1.02275	1.01104	1.01962	0.900405	0.939716	0.968818
		3.19	1.02059	1.01226	1.01914	0.903035	0.939242	0.967833
		3.19333	1.01941	1.01154	1.02117	0.903476	0.940793	0.967284
		3.19667	1.02052	1.01226	1.02126	0.904327	0.942665	0.967522
		3.2	1.01849	1.01187	1.02093	0.904993	0.946789	0.970199
		3.20333	1.01676	1.01197	1.02246	0.908312	0.949017	0.971629
		3.20667	1.01826	1.01127	1.02277	0.906353	0.951456	0.972126
		3.21	1.0189	1.01193	1.02079	0.905315	0.950597	0.972471
		3.21333	1.01903	1.01178	1.02197	0.905003	0.951407	0.971834
		3.21667	1.01774	1.01274	1.02481	0.904161	0.949714	0.969587
		3.22	1.01924	1.01314	1.02506	0.902808	0.949161	0.970751
		3.22333	1.01838	1.01483	1.02446	0.90329	0.948396	0.971839
		3.22667	1.01724	1.01458	1.0262	0.901904	0.949944	0.973567
		3.23	1.0161	1.01327	1.02476	0.90326	0.950152	0.97539
		3.23333	1.01797	1.01251	1.02337	0.905015	0.950172	0.975903
		3.23667	1.01759	1.01276	1.02248	0.905809	0.949056	0.975865
		3.24	1.01856	1.01278	1.02239	0.907431	0.950523	0.974878
		3.24333	1.01886	1.01382	1.02325	0.909106	0.949445	0.973098
		3.24667	1.02226	1.01517	1.02417	0.909695	0.949334	0.972878
		3.25	1.02267	1.01481	1.02389	0.908165	0.949995	0.974749
		3.25333	1.02248	1.01504	1.02451	0.906896	0.949947	0.973783
		3.25667	1.02092	1.01545	1.02396	0.905927	0.945721	0.974693
		3.26	1.02385	1.01555	1.02428	0.905844	0.947202	0.975895
		3.26333	1.02183	1.01654	1.02364	0.905405	0.946956	0.975437
		3.26667	1.02297	1.01815	1.02408	0.906348	0.94752	0.973283
		3.27	1.02176	1.01771	1.02539	0.907985	0.950644	0.974004
		3.27333	1.0234	1.01716	1.02596	0.907858	0.955645	0.973615
		3.27667	1.02258	1.01716	1.02557	0.908686	0.955742	0.972983
		3.28	1.02305	1.01634	1.02513	0.909646	0.95475	0.971945
		3.28333	1.02276	1.01582	1.02387	0.909919	0.954237	0.971384
		3.28667	1.02355	1.01607	1.02349	0.907863	0.952318	0.971904
		3.29	1.02243	1.01645	1.02463	0.908829	0.950997	0.970603
		3.29333	1.02248	1.01673	1.02417	0.909686	0.953399	0.970052
		3.29667	1.02098	1.01684	1.02507	0.908784	0.953442	0.969498
		3.3	1.02097	1.01743	1.02696	0.908121	0.953905	0.969361
		3.30333	1.02185	1.01688	1.02431	0.909197	0.953234	0.969165
		3.30667	1.02328	1.01703	1.02484	0.90913	0.955544	0.972194
		3.31	1.02417	1.01693	1.02588	0.907968	0.95121	0.971018
		3.31333	1.02682	1.01765	1.02543	0.909051	0.953741	0.971206
		3.31667	1.02749	1.01796	1.02518	0.910881	0.955679	0.971985
		3.32	1.03024	1.01825	1.02738	0.910383	0.958344	0.971326
		3.32333	1.03111	1.01833	1.0274	0.910305	0.956475	0.968627
		3.32667	1.03031	1.01785	1.02735	0.909372	0.958248	0.969364
		3.33	1.03031	1.01816	1.02747	0.907964	0.957913	0.97042
		3.33333	1.02956	1.01721	1.02804	0.907648	0.9557	0.970459
		3.33667	1.02726	1.01852	1.02724	0.909358	0.952764	0.971647
		3.34	1.02611	1.01904	1.02815	0.90853	0.95446	0.975066
		3.34333	1.02502	1.0195	1.02757	0.910381	0.955742	0.975137
		3.34667	1.0239	1.01837	1.02818	0.912316	0.954407	0.974623
		3.35	1.0247	1.01871	1.02783	0.910588	0.956478	0.974966
		3.35333	1.02458	1.01864	1.02818	0.909473	0.957318	0.972917
		3.35667	1.02638	1.01767	1.02722	0.911615	0.957467	0.971318
		3.36	1.02782	1.01832	1.02819	0.912433	0.958149	0.972027
		3.36333	1.02809	1.01947	1.02752	0.911079	0.959532	0.973136
		3.36667	1.02997	1.0191	1.02834	0.911165	0.958797	0.973811
		3.37	1.02951	1.02005	1.0284	0.910726	0.96074	0.974234
		3.37333	1.02685	1.02023	1.02828	0.909264	0.957976	0.974626
		3.37667	1.02683	1.0202	1.02737	0.908471	0.957403	0.976198
		3.38	1.02661	1.01967	1.02812	0.908264	0.955893	0.976148
		3.38333	1.02416	1.02029	1.02826	0.911618	0.958031	0.977219
		3.38667	1.02591	1.01989	1.02928	0.912065	0.957423	0.980434
		3.39	1.02854	1.02019	1.02961	0.911667	0.95984	0.980613
		3.39333	1.02959	1.01881	1.03019	0.913539	0.960636	0.979092
		3.39667	1.03171	1.02093	1.03176	0.915107	0.961149	0.979181
		3.4	1.03262	1.02149	1.03195	0.913691	0.958592	0.980977
		3.40333	1.03271	1.02085	1.03135	0.91418	0.958851	0.977689
		3.40667	1.03262	1.02032	1.03145	0.916249	0.959421	0.977325
		3.41	1.03206	1.02117	1.0317	0.913713	0.959894	0.978805
		3.41333	1.03216	1.02148	1.03006	0.914139	0.963153	0.981514
		3.41667	1.0313	1.02174	1.02925	0.914424	0.964408	0.979334
		3.42	1.03173	1.02319	1.02945	0.91414	0.963991	0.978124
		3.42333	1.03058	1.02462	1.02937	0.914378	0.964035	0.978345
		3.42667	1.03227	1.0256	1.02947	0.915885	0.963715	0.97755
		3.43	1.03149	1.02425	1.03036	0.914785	0.963618	0.977066
		3.43333	1.03427	1.02462	1.03108	0.91523	0.964184	0.978792
		3.43667	1.03472	1.02334	1.03039	0.916231	0.964865	0.982703
		3.44	1.03625	1.02256	1.03201	0.9165	0.963801	0.984577
		3.44333	1.03343	1.02201	1.03142	0.917418	0.962122	0.985223
		3.44667	1.03357	1.0222	1.03157	0.918414	0.959217	0.984622
		3.45	1.02954	1.02308	1.03189	0.920204	0.958141	0.983466
		3.45333	1.02758	1.02485	1.03495	0.919914	0.956024	0.983577
		3.45667	1.02727	1.026	1.03379	0.91871	0.956998	0.981604
		3.46	1.02888	1.02639	1.03399	0.919548	0.957851	0.980428
		3.46333	1.02942	1.02716	1.03302	0.917991	0.962407	0.980949
		3.46667	1.03122	1.02645	1.03357	0.914211	0.964113	0.98185
		3.47	1.03182	1.02605	1.0318	0.915246	0.96657	0.980653
		3.47333	1.03354	1.02621	1.03339	0.915724	0.966033	0.980744
		3.47667	1.03397	1.02746	1.03443	0.913233	0.965556	0.981837
		3.48	1.03343	1.02775	1.03614	0.914013	0.962744	0.979487
		3.48333	1.03373	1.02779	1.03475	0.915154	0.961281	0.979091
		3.48667	1.03385	1.02767	1.03585	0.914772	0.961718	0.979966
		3.49	1.03266	1.02756	1.03516	0.914303	0.963406	0.979145
		3.49333	1.03375	1.02666	1.03553	0.915472	0.963588	0.979518
		3.49667	1.03482	1.02637	1.03465	0.914922	0.96578	0.979764
		3.5	1.03652	1.02819	1.03614	0.915991	0.964971	0.97692
		3.50333	1.03958	1.02869	1.03561	0.915409	0.964912	0.977382
		3.50667	1.04039	1.02985	1.03692	0.915656	0.962815	0.978726
		3.51	1.03947	1.03147	1.03566	0.917037	0.963392	0.97804
		3.51333	1.04089	1.03094	1.03705	0.91637	0.960268	0.978887
		3.51667	1.04143	1.03049	1.0376	0.916466	0.963127	0.981558
		3.52	1.04023	1.03077	1.03827	0.917871	0.964787	0.980133
		3.52333	1.03928	1.03005	1.03527	0.917754	0.966976	0.980556
		3.52667	1.03714	1.02771	1.03638	0.916523	0.969566	0.982645
		3.53	1.0364	1.02909	1.03574	0.919688	0.972857	0.984434
		3.53333	1.03495	1.03019	1.035	0.920115	0.974143	0.983584
		3.53667	1.03542	1.02918	1.03423	0.919678	0.971683	0.984422
		3.54	1.03422	1.02918	1.03487	0.92219	0.97021	0.98526
		3.54333	1.03724	1.03067	1.03428	0.922884	0.967448	0.985757
		3.54667	1.03913	1.03114	1.03599	0.920766	0.967616	0.984247
		3.55	1.03954	1.02919	1.03582	0.920597	0.965416	0.985291
		3.55333	1.03878	1.03007	1.03504	0.922059	0.965705	0.985124
		3.55667	1.04023	1.02955	1.03723	0.919576	0.965555	0.985627
		3.56	1.0404	1.02916	1.039	0.920565	0.96763	0.983689
		3.56333	1.03886	1.02804	1.0371	0.922671	0.965587	0.98403
		3.56667	1.04056	1.02835	1.03901	0.922206	0.964908	0.984422
		3.57	1.0412	1.02845	1.04113	0.921345	0.96578	0.98599
		3.57333	1.04384	1.03018	1.04061	0.922455	0.96597	0.98488
		3.57667	1.04318	1.03162	1.04041	0.922206	0.966003	0.984066
		3.58	1.04219	1.03139	1.04097	0.922075	0.964256	0.983889
		3.58333	1.04145	1.0312	1.03949	0.92286	0.963705	0.984999
		3.58667	1.04377	1.03007	1.0391	0.922863	0.965097	0.983514
		3.59	1.04417	1.02961	1.03859	0.924468	0.964863	0.984045
		3.59333	1.04585	1.02848	1.03743	0.924366	0.96615	0.983162
		3.59667	1.0467	1.0283	1.03645	0.92356	0.968895	0.983196
		3.6	1.04694	1.02869	1.03856	0.921997	0.973487	0.980383
		3.60333	1.04348	1.0301	1.03878	0.92296	0.97148	0.980226
		3.60667	1.04018	1.02951	1.03762	0.921066	0.972677	0.979536
		3.61	1.03706	1.03058	1.03783	0.921246	0.972274	0.982302
		3.61333	1.03626	1.03185	1.0399	0.920964	0.976388	0.980721
		3.61667	1.03646	1.03191	1.03761	0.921993	0.97574	0.982641
		3.62	1.03803	1.03248	1.03765	0.9232	0.977809	0.984857
		3.62333	1.04027	1.03271	1.03925	0.925222	0.979754	0.987403
		3.62667	1.04336	1.03162	1.03982	0.924158	0.977755	0.987757
		3.63	1.04449	1.03159	1.03791	0.926048	0.973708	0.991834
		3.63333	1.04528	1.0313	1.03826	0.927561	0.971637	0.989421
		3.63667	1.04432	1.03101	1.03778	0.926585	0.971176	0.989383
		3.64	1.0422	1.03145	1.03619	0.925111	0.972952	0.987703
		3.64333	1.03862	1.0321	1.03637	0.92736	0.973936	0.986285
		3.64667	1.03995	1.03225	1.0377	0.927338	0.974867	0.98491
		3.65	1.03833	1.03258	1.03851	0.925863	0.977877	0.987986
		3.65333	1.03995	1.03392	1.03787	0.926304	0.978696	0.98756
		3.65667	1.04111	1.03399	1.03996	0.926807	0.976463	0.9889
		3.66	1.04222	1.03407	1.04121	0.924399	0.978518	0.99094
		3.66333	1.04101	1.03413	1.04087	0.923551	0.976525	0.991375
		3.66667	1.04104	1.03424	1.04026	0.924142	0.975547	0.992244
		3.67	1.04161	1.03243	1.04108	0.923667	0.975587	0.992216
		3.67333	1.04366	1.0331	1.04098	0.923167	0.972998	0.990421
		3.67667	1.04508	1.03343	1.03942	0.924538	0.970475	0.99052
		3.68	1.04541	1.03404	1.04024	0.923787	0.975253	0.98914
		3.68333	1.04734	1.03465	1.04119	0.923214	0.975492	0.986657
		3.68667	1.04682	1.03571	1.04076	0.920917	0.975804	0.987919
		3.69	1.04565	1.03428	1.04064	0.920691	0.980031	0.990013
		3.69333	1.04626	1.03543	1.0418	0.919105	0.981245	0.990398
		3.69667	1.04671	1.03592	1.04064	0.920027	0.978647	0.991453
		3.7	1.04601	1.03547	1.04092	0.921084	0.978428	0.994069
		3.70333	1.04597	1.03473	1.0434	0.922386	0.979414	0.992752
		3.70667	1.04422	1.03568	1.04484	0.923812	0.978198	0.992693
		3.71	1.04468	1.03454	1.04585	0.925206	0.979484	0.993474
		3.71333	1.0455	1.03354	1.04631	0.925542	0.979225	0.993337
		3.71667	1.04711	1.03369	1.04686	0.924985	0.978228	0.993015
		3.72	1.0472	1.03447	1.04645	0.924707	0.976696	0.994035
		3.72333	1.04714	1.03536	1.04485	0.923368	0.977698	0.991972
		3.72667	1.04736	1.03592	1.04292	0.923731	0.979069	0.991369
		3.73	1.04763	1.03683	1.04412	0.924867	0.979906	0.991247
		3.73333	1.0448	1.03772	1.04428	0.926014	0.980518	0.989374
		3.73667	1.04675	1.03775	1.04255	0.9285	0.981243	0.988266
		3.74	1.04846	1.03738	1.04449	0.930494	0.979254	0.990758
		3.74333	1.04666	1.03792	1.0449	0.931571	0.973399	0.989257
		3.74667	1.04397	1.03806	1.04421	0.929859	0.973045	0.990466
		3.75	1.04536	1.03842	1.04203	0.929696	0.975159	0.992204
		3.75333	1.04251	1.03879	1.04405	0.929942	0.971513	0.991406
		3.75667	1.04097	1.03914	1.04293	0.928333	0.972118	0.991009
		3.76	1.04274	1.03816	1.04498	0.928474	0.97507	0.991203
		3.76333	1.04345	1.03813	1.04499	0.92949	0.974999	0.990378
		3.76667	1.0434	1.03862	1.0473	0.93006	0.976135	0.991251
		3.77	1.04464	1.03779	1.04625	0.928569	0.979762	0.992301
		3.77333	1.04552	1.0372	1.04797	0.929376	0.979584	0.992554
		3.77667	1.04528	1.03847	1.04582	0.929338	0.982236	0.993673
		3.78	1.04591	1.03914	1.04687	0.928735	0.984208	0.993448
		3.78333	1.04587	1.03868	1.04527	0.929083	0.983685	0.993844
		3.78667	1.04402	1.03994	1.04573	0.929702	0.983353	0.994694
		3.79	1.04376	1.04078	1.04482	0.93057	0.985008	0.994543
		3.79333	1.0451	1.03969	1.04536	0.929063	0.983011	0.994681
		3.79667	1.04437	1.03863	1.04501	0.929187	0.982925	0.995606
		3.8	1.04555	1.03822	1.04517	0.928421	0.981757	0.996258
		3.80333	1.04562	1.03802	1.04474	0.92791	0.983095	0.99546
		3.80667	1.04471	1.0377	1.04403	0.927367	0.981743	0.993559
		3.81	1.04517	1.03801	1.04488	0.929242	0.983105	0.993489
		3.81333	1.04744	1.03886	1.04477	0.928745	0.982983	0.993016
		3.81667	1.04797	1.03998	1.04608	0.928704	0.983977	0.992743
		3.82	1.05111	1.0411	1.04612	0.929034	0.983265	0.993608
		3.82333	1.05149	1.04241	1.04764	0.930701	0.984223	0.995589
		3.82667	1.05007	1.04412	1.04797	0.929687	0.983572	0.996215
		3.83	1.05085	1.04432	1.04716	0.932217	0.983289	0.997631
		3.83333	1.05116	1.0438	1.04879	0.932454	0.981465	0.9954
		3.83667	1.04912	1.044	1.04924	0.933345	0.983045	0.996226
		3.84	1.04936	1.04456	1.04811	0.932257	0.985058	0.99627
		3.84333	1.0485	1.04207	1.04727	0.933294	0.985668	0.995825
		3.84667	1.04622	1.04272	1.04924	0.932116	0.985384	0.994376
		3.85	1.04506	1.04365	1.04872	0.931747	0.988309	0.995163
		3.85333	1.04764	1.04203	1.05059	0.932332	0.986798	0.994242
		3.85667	1.05007	1.04149	1.04937	0.933253	0.987609	0.991283
		3.86	1.05197	1.04475	1.04971	0.932284	0.986396	0.990396
		3.86333	1.05341	1.04398	1.04968	0.933034	0.986174	0.990587
		3.86667	1.0534	1.04435	1.04981	0.933679	0.984413	0.988628
		3.87	1.04974	1.04501	1.04923	0.932992	0.985873	0.987766
		3.87333	1.04801	1.04471	1.05066	0.932144	0.983852	0.990118
		3.87667	1.04711	1.04345	1.05169	0.93035	0.985182	0.988792
		3.88	1.04638	1.04334	1.05117	0.929197	0.989064	0.987833
		3.88333	1.04722	1.04219	1.05167	0.930678	0.989176	0.99132
		3.88667	1.05048	1.04214	1.0517	0.929374	0.988908	0.990867
		3.89	1.05123	1.04296	1.05143	0.927867	0.988467	0.989258
		3.89333	1.05318	1.04317	1.05119	0.930307	0.984378	0.992831
		3.89667	1.05378	1.04312	1.05038	0.930509	0.980672	0.991369
		3.9	1.05348	1.04238	1.05005	0.930954	0.980467	0.989003
		3.90333	1.05228	1.04304	1.04952	0.933682	0.980224	0.990321
		3.90667	1.05391	1.04167	1.05023	0.935644	0.980711	0.992113
		3.91	1.0517	1.04186	1.05008	0.935851	0.986803	0.990822
		3.91333	1.05127	1.04234	1.05096	0.936018	0.989217	0.993737
		3.91667	1.05161	1.04406	1.0502	0.935721	0.989116	0.995351
		3.92	1.05167	1.04416	1.05009	0.93558	0.98726	0.996474
		3.92333	1.04903	1.04564	1.05055	0.934748	0.986815	0.99657
		3.92667	1.04803	1.04427	1.05086	0.935231	0.984066	0.996506
		3.93	1.04789	1.04439	1.05104	0.936838	0.982823	0.99588
		3.93333	1.04655	1.04554	1.0508	0.935853	0.983929	0.994813
		3.93667	1.04659	1.04452	1.05185	0.935591	0.986643	0.994614
		3.94	1.04829	1.04408	1.05336	0.93539	0.986829	0.994026
		3.94333	1.05078	1.04527	1.05298	0.935443	0.990351	0.993253
		3.94667	1.05282	1.04454	1.05231	0.934982	0.991231	0.993804
		3.95	1.05522	1.04309	1.05197	0.936491	0.990027	0.994595
		3.95333	1.05605	1.04424	1.05243	0.93515	0.986708	0.992277
		3.95667	1.05673	1.04356	1.05109	0.936741	0.987055	0.992857
		3.96	1.05577	1.04489	1.05178	0.936342	0.983219	0.991683
		3.96333	1.05461	1.04648	1.05327	0.936906	0.98385	0.991153
		3.96667	1.05586	1.0459	1.0546	0.936389	0.988172	0.991505
		3.97	1.05582	1.04569	1.05339	0.936695	0.991795	0.991526
		3.97333	1.05623	1.04646	1.05298	0.937302	0.992524	0.992719
		3.97667	1.05745	1.0456	1.05204	0.937555	0.995848	0.993971
		3.98	1.05875	1.04537	1.05151	0.937054	0.995504	0.994047
		3.98333	1.05686	1.04827	1.05194	0.936948	0.991831	0.994595
		3.98667	1.05784	1.04847	1.05153	0.93932	0.99273	0.995071
		3.99	1.05611	1.04931	1.05227	0.939293	0.994259	0.995575
		3.99333	1.05377	1.04839	1.05401	0.939289	0.992384	0.995779
		3.99667	1.05076	1.04888	1.05308	0.940032	0.991249	0.995412
		4	1.0525	1.04663	1.05156	0.939766	0.992634	0.993656
		4.00333	1.05304	1.04656	1.05196	0.939454	0.99266	0.995394
		4.00667	1.0544	1.04599	1.05213	0.938885	0.991917	0.994084
		4.01	1.05687	1.04617	1.05237	0.940154	0.992197	0.995805
		4.01333	1.05827	1.04643	1.05493	0.93995	0.993688	0.997531
		4.01667	1.0569	1.04734	1.05632	0.939446	0.994819	0.998316
		4.02	1.05422	1.04704	1.05905	0.938545	0.992647	0.998426
		4.02333	1.05475	1.04718	1.05756	0.939002	0.99256	0.999243
		4.02667	1.05428	1.04802	1.05704	0.937879	0.995104	0.999074
		4.03	1.05462	1.04621	1.05669	0.937284	0.994674	0.997674
		4.03333	1.0552	1.04577	1.05831	0.93671	0.994041	0.997477
		4.03667	1.05704	1.04636	1.05596	0.935997	0.993938	0.996991
		4.04	1.05509	1.04612	1.05836	0.9369	0.992777	0.998157
		4.04333	1.05328	1.04644	1.05752	0.935946	0.991781	0.996384
		4.04667	1.05433	1.04679	1.05723	0.935767	0.990951	0.995117
		4.05	1.05402	1.04706	1.05566	0.936035	0.991725	0.995947
		4.05333	1.05308	1.04673	1.05656	0.936698	0.992675	0.996049
		4.05667	1.05287	1.04695	1.0569	0.93655	0.994635	0.994468
		4.06	1.05578	1.04653	1.05761	0.938661	0.994988	0.994094
		4.06333	1.05533	1.04702	1.05639	0.939096	0.993354	0.996359
		4.06667	1.05498	1.04756	1.05715	0.939312	0.995824	0.99602
		4.07	1.05503	1.04935	1.05839	0.938892	0.997363	0.995705
		4.07333	1.05807	1.04821	1.0569	0.937447	0.998461	0.995678
		4.07667	1.05928	1.04748	1.05682	0.936894	1.00107	0.997585
		4.08	1.05948	1.04824	1.05957	0.937461	1.00286	0.995863
		4.08333	1.06018	1.04693	1.05856	0.938203	0.999393	0.996332
		4.08667	1.06124	1.04669	1.05637	0.937326	1.00006	0.995636
		4.09	1.0623	1.04917	1.05652	0.938574	0.998987	0.995562
		4.09333	1.058	1.05041	1.0565	0.937936	0.995327	0.996635
		4.09667	1.05652	1.04905	1.05574	0.936815	0.998627	0.997812
		4.1	1.0562	1.04998	1.0569	0.938286	0.995397	0.998177
		4.10333	1.0572	1.049	1.05874	0.939057	0.991931	1.00075
		4.10667	1.05606	1.04902	1.05818	0.937764	0.991161	1.00225
		4.11	1.05968	1.04872	1.05917	0.938981	0.990949	1.00115
		4.11333	1.06264	1.0503	1.06075	0.940918	0.989975	1.00347
		4.11667	1.06178	1.05135	1.06098	0.941115	0.99441	1.00204
		4.12	1.06022	1.05141	1.05963	0.941446	0.996869	1.00175
		4.12333	1.05925	1.0499	1.05874	0.942815	0.998553	1.00112
		4.12667	1.0571	1.05036	1.05909	0.94039	1.00025	1.00303
		4.13	1.05609	1.05032	1.05713	0.941233	0.999528	0.99987
		4.13333	1.05623	1.04842	1.05834	0.94157	1.00147	1.00141
		4.13667	1.05738	1.04954	1.05961	0.94371	1.00244	1.00301
		4.14	1.05567	1.04978	1.06169	0.942161	1.00069	1.00464
		4.14333	1.05559	1.04939	1.06204	0.944343	1.00121	1.00361
		4.14667	1.0541	1.04922	1.06128	0.943478	1.00022	1.00683
		4.15	1.05287	1.05095	1.05986	0.942243	0.997759	1.00981
		4.15333	1.05332	1.05083	1.05792	0.941208	0.999217	1.00713
		4.15667	1.05749	1.0509	1.0583	0.943328	1.00098	1.00738
		4.16	1.06008	1.05223	1.05731	0.943252	0.998911	1.00834
		4.16333	1.06253	1.05235	1.05774	0.942594	0.998885	1.0044
		4.16667	1.0636	1.05182	1.05794	0.943728	0.999831	1.00066
		4.17	1.06285	1.05154	1.05914	0.944048	0.997682	1.00194
		4.17333	1.06157	1.05263	1.0607	0.94181	0.994054	0.998412
		4.17667	1.05782	1.05131	1.05971	0.941408	0.997666	0.997507
		4.18	1.05685	1.05117	1.05941	0.942767	1.00008	0.999224
		4.18333	1.05784	1.05184	1.05937	0.940331	0.999946	0.999725
		4.18667	1.05927	1.05137	1.06047	0.939483	1.00039	0.998737
		4.19	1.05897	1.05123	1.05928	0.943443	1.00421	1.00159
		4.19333	1.06032	1.05252	1.06017	0.943715	1.00168	1.00007
		4.19667	1.05819	1.05318	1.06199	0.943583	1.00178	0.999917
		4.2	1.05822	1.05358	1.06246	0.945825	1.00474	1.00064
		4.20333	1.0557	1.05426	1.06245	0.947917	1.00536	1.00065
		4.20667	1.05502	1.054	1.06362	0.946031	1.00553	1.00037
		4.21	1.05711	1.05451	1.0631	0.946186	1.00609	1.00123
		4.21333	1.05988	1.05406	1.06292	0.945144	1.00388	1.00202
		4.21667	1.06009	1.05285	1.06282	0.945021	0.999855	1.00286
		4.22	1.05973	1.05229	1.06136	0.943297	0.997976	1.00272
		4.22333	1.05984	1.051	1.05982	0.94333	0.99785	1.00286
		4.22667	1.05886	1.05085	1.05987	0.942294	0.997197	1.00459
		4.23	1.05741	1.05239	1.06066	0.942327	0.998538	1.00436
		4.23333	1.05692	1.05451	1.06036	0.942423	0.999588	1.00515
		4.23667	1.05696	1.05479	1.06195	0.941616	1.00278	1.00639
		4.24	1.05649	1.0561	1.0628	0.942996	1.00293	1.0048
		4.24333	1.0555	1.0561	1.06349	0.944709	1.002	1.00374
		4.24667	1.05566	1.05472	1.06356	0.945559	1.00266	1.00444
		4.25	1.0567	1.05398	1.06461	0.945233	1.00396	1.00283
		4.25333	1.05793	1.05512	1.0649	0.945329	1.00039	1.00222
		4.25667	1.05932	1.05576	1.06447	0.943613	0.998555	1.00418
		4.26	1.06103	1.05576	1.0663	0.942155	0.999691	1.00474
		4.26333	1.06275	1.05643	1.06536	0.941677	0.998736	1.00494
		4.26667	1.06235	1.05609	1.06463	0.939902	0.99941	1.00617
		4.27	1.06241	1.0551	1.06456	0.941285	1.00205	1.00657
		4.27333	1.06041	1.05526	1.06652	0.941552	1.00416	1.00715
		4.27667	1.059	1.05456	1.06462	0.942686	1.0056	1.00707
		4.28	1.05883	1.05527	1.0655	0.944548	1.00597	1.00523
		4.28333	1.05969	1.05475	1.06534	0.948045	1.00362	1.00609
		4.28667	1.05979	1.05607	1.06448	0.948705	1.003	1.00521
		4.29	1.06174	1.05527	1.06321	0.950722	1.00274	1.0033
		4.29333	1.06188	1.05564	1.06362	0.950745	1.00345	1.00189
		4.29667	1.05951	1.05492	1.06388	0.951542	1.00252	1.00417
		4.3	1.05712	1.05631	1.06553	0.950624	1.00392	1.00185
		4.30333	1.05881	1.05452	1.06738	0.95027	1.00241	1.00255
		4.30667	1.05926	1.05592	1.0671	0.948421	1.00149	1.00366
		4.31	1.05953	1.05666	1.06818	0.950276	1.00001	1.00318
		4.31333	1.05981	1.05682	1.06797	0.949351	1.00052	1.00294
		4.31667	1.06013	1.05641	1.06699	0.950418	1.00035	1.00348
		4.32	1.06046	1.05804	1.06806	0.949751	1.00326	1.00551
		4.32333	1.05739	1.05906	1.06837	0.952109	1.00372	1.00582
		4.32667	1.05956	1.05751	1.0678	0.949705	1.00405	1.00717
		4.33	1.06235	1.05837	1.06776	0.948491	1.00471	1.00533
		4.33333	1.06373	1.05838	1.06784	0.946956	1.00431	1.00713
		4.33667	1.06202	1.05704	1.06655	0.948914	1.00427	1.00369
		4.34	1.06326	1.05619	1.06636	0.9495	1.00529	1.00177
		4.34333	1.06126	1.05851	1.06547	0.95054	1.00616	1.0019
		4.34667	1.05881	1.05767	1.06566	0.951399	1.00925	1.00262
		4.35	1.06001	1.0572	1.06686	0.952892	1.01074	0.999681
		4.35333	1.05964	1.05916	1.0673	0.951305	1.00985	1.00069
		4.35667	1.06065	1.05769	1.06824	0.949095	1.00953	1.00251
		4.36	1.0599	1.05716	1.0709	0.949836	1.01017	1.00474
		4.36333	1.06073	1.05604	1.07069	0.950445	1.00788	1.00471
		4.36667	1.06064	1.05699	1.07033	0.949912	1.00696	1.00702
		4.37	1.06177	1.05587	1.06935	0.949673	1.00734	1.00757
		4.37333	1.06182	1.05784	1.0687	0.949621	1.00674	1.00468
		4.37667	1.0638	1.05794	1.06749	0.949483	1.00655	1.00331
		4.38	1.06607	1.05987	1.06735	0.950031	1.00822	1.00478
		4.38333	1.0635	1.05991	1.06597	0.949562	1.01089	1.00203
		4.38667	1.062	1.06116	1.06703	0.949525	1.01177	1.00232
		4.39	1.06121	1.06029	1.06725	0.951016	1.01307	1.00538
		4.39333	1.06152	1.06084	1.06879	0.952108	1.01308	1.00435
		4.39667	1.06034	1.06127	1.06838	0.951166	1.01356	1.00259
		4.4	1.06327	1.06141	1.06973	0.951911	1.01259	1.00532
		4.40333	1.06339	1.06071	1.06899	0.952751	1.01139	1.00324
		4.40667	1.06535	1.06122	1.06927	0.95277	1.01382	1.00333
		4.41	1.0652	1.06056	1.06896	0.952379	1.01484	1.00449
		4.41333	1.06478	1.05897	1.06933	0.953	1.01384	1.00664
		4.41667	1.06313	1.0591	1.07151	0.952095	1.01347	1.00785
		4.42	1.06355	1.05957	1.07194	0.951884	1.01608	1.00928
		4.42333	1.06317	1.05892	1.07185	0.951155	1.01205	1.01067
		4.42667	1.06278	1.05826	1.06896	0.949109	1.0115	1.0117
		4.43	1.06342	1.05922	1.06968	0.947999	1.01026	1.00898
		4.43333	1.06407	1.05954	1.06811	0.949842	1.01151	1.00836
		4.43667	1.06509	1.05996	1.0679	0.951244	1.00943	1.00857
		4.44	1.06512	1.06111	1.0689	0.95082	1.01042	1.00679
		4.44333	1.06585	1.06221	1.0703	0.953909	1.01041	1.00581
		4.44667	1.06648	1.06305	1.06918	0.953694	1.01225	1.0066
		4.45	1.06654	1.06181	1.07049	0.954179	1.01106	1.00412
		4.45333	1.06634	1.06281	1.06954	0.953096	1.01127	1.00466
		4.45667	1.06663	1.06172	1.06874	0.954155	1.01173	1.00586
		4.46	1.06621	1.06207	1.07052	0.954754	1.01002	1.00619
		4.46333	1.06523	1.06248	1.07129	0.956482	1.00824	1.00757
		4.46667	1.0662	1.06373	1.07034	0.954368	1.00665	1.00905
		4.47	1.0651	1.06326	1.07203	0.956478	1.00518	1.00877
		4.47333	1.06234	1.0625	1.07326	0.956901	1.00526	1.00704
		4.47667	1.06282	1.06156	1.07187	0.952787	1.005	1.00505
		4.48	1.06414	1.06269	1.07292	0.950635	1.00583	1.0045
		4.48333	1.06417	1.06214	1.07289	0.953101	1.008	1.00281
		4.48667	1.06667	1.06179	1.07206	0.95208	1.01145	1.00105
		4.49	1.06844	1.06369	1.07012	0.952024	1.01182	1.00233
		4.49333	1.06665	1.06461	1.07042	0.953465	1.01275	1.00351
		4.49667	1.06616	1.06227	1.07035	0.955394	1.00953	1.00399
		4.5	1.06509	1.06242	1.06869	0.954249	1.00941	1.00644
		4.50333	1.06343	1.0619	1.0677	0.95487	1.00694	1.00901
		4.50667	1.06462	1.06234	1.06975	0.9542	1.00687	1.00922
		4.51	1.06579	1.06237	1.07225	0.956121	1.00963	1.01013
		4.51333	1.06431	1.0625	1.07237	0.956243	1.01394	1.00961
		4.51667	1.0638	1.06364	1.07269	0.956781	1.0153	1.00887
		4.52	1.06384	1.06494	1.07566	0.956151	1.01407	1.00913
		4.52333	1.06213	1.06324	1.07502	0.957427	1.01518	1.01001
		4.52667	1.06406	1.06324	1.07358	0.95659	1.01475	1.009
		4.53	1.06558	1.06476	1.07238	0.95698	1.01476	1.01093
		4.53333	1.06597	1.06469	1.07345	0.957254	1.01318	1.01278
		4.53667	1.06628	1.0632	1.07274	0.956096	1.01384	1.01324
		4.54	1.06897	1.06402	1.0733	0.956423	1.01274	1.01182
		4.54333	1.067	1.06306	1.07229	0.95589	1.01214	1.01342
		4.54667	1.06641	1.06256	1.07283	0.954548	1.00963	1.01137
		4.55	1.06564	1.06239	1.0729	0.953351	1.00699	1.01058
		4.55333	1.06768	1.06344	1.0723	0.954719	1.00955	1.00892
		4.55667	1.06628	1.06417	1.07117	0.952939	1.00934	1.00936
		4.56	1.06666	1.06498	1.07183	0.953825	1.00855	1.00952
		4.56333	1.06316	1.06581	1.07181	0.955415	1.01157	1.00924
		4.56667	1.06885	1.06626	1.07233	0.956747	1.01439	1.01033
		4.57	1.06354	1.06659	1.0717	0.957454	1.01603	1.0106
		4.57333	1.06975	1.06678	1.0719	0.958208	1.01656	1.01094
		4.57667	1.06954	1.06642	1.07195	0.958816	1.0177	1.00836
		4.58	1.0735	1.06496	1.07302	0.958863	1.01369	1.0093
		4.58333	1.07059	1.0651	1.07413	0.957965	1.01093	1.01002
		4.58667	1.07398	1.06529	1.07479	0.957898	1.00895	1.01302
		4.59	1.06896	1.06455	1.07521	0.957662	1.00721	1.01225
		4.59333	1.06893	1.06659	1.07585	0.959169	1.00637	1.01413
		4.59667	1.06901	1.06782	1.07665	0.959569	1.00993	1.0143
		4.6	1.06757	1.06637	1.07581	0.959883	1.01238	1.01343
		4.60333	1.06896	1.06605	1.07648	0.959557	1.0114	1.01061
		4.60667	1.06854	1.06659	1.07696	0.960025	1.0163	1.01131
		4.61	1.06941	1.06513	1.07874	0.959311	1.01558	1.01073
		4.61333	1.06882	1.06409	1.08075	0.956872	1.01585	1.0103
		4.61667	1.06836	1.06561	1.08088	0.955912	1.01897	1.01046
		4.62	1.06815	1.06578	1.08163	0.957639	1.01939	1.01074
		4.62333	1.06687	1.06387	1.08088	0.957142	1.01689	1.01156
		4.62667	1.06513	1.06424	1.07857	0.955718	1.01978	1.01219
		4.63	1.0657	1.06422	1.07539	0.957587	1.0183	1.01161
		4.63333	1.06732	1.06422	1.0754	0.959067	1.01587	1.01199
		4.63667	1.06658	1.06233	1.07364	0.957387	1.01456	1.01006
		4.64	1.06654	1.06451	1.07408	0.956684	1.01168	1.00953
		4.64333	1.0684	1.06446	1.07347	0.956356	1.00814	1.00866
		4.64667	1.06976	1.06562	1.07376	0.954834	1.00891	1.00973
		4.65	1.0689	1.06458	1.07358	0.955653	1.01013	1.00997
		4.65333	1.0697	1.06712	1.07516	0.954869	1.01192	1.0123
		4.65667	1.07122	1.06658	1.07676	0.955182	1.01514	1.0114
		4.66	1.07184	1.06628	1.07608	0.957743	1.01708	1.01309
		4.66333	1.07134	1.06635	1.07811	0.958802	1.01639	1.0142
		4.66667	1.07147	1.06748	1.077	0.956956	1.01677	1.01257
		4.67	1.07198	1.06708	1.07569	0.957579	1.01896	1.01443
		4.67333	1.07304	1.06778	1.075	0.959393	1.01779	1.01649
		4.67667	1.07474	1.06798	1.07658	0.958513	1.02085	1.01611
		4.68	1.0733	1.06783	1.07419	0.958216	1.02021	1.01525
		4.68333	1.07448	1.06726	1.07418	0.960773	1.01788	1.01546
		4.68667	1.07316	1.06825	1.07525	0.960596	1.01656	1.01431
		4.69	1.07085	1.06797	1.07593	0.959742	1.01643	1.01468
		4.69333	1.06781	1.06854	1.0762	0.95925	1.01256	1.01598
		4.69667	1.06919	1.06793	1.07733	0.960447	1.01382	1.01448
		4.7	1.06921	1.06903	1.07696	0.960278	1.0177	1.01293
		4.70333	1.06953	1.06943	1.07693	0.961542	1.01852	1.01238
		4.70667	1.07011	1.06938	1.07607	0.961368	1.02173	1.01138
		4.71	1.07074	1.07097	1.07542	0.962134	1.02468	1.01006
		4.71333	1.07151	1.0716	1.0749	0.961711	1.02263	1.01084
		4.71667	1.06801	1.07121	1.0769	0.959996	1.01927	1.0117
		4.72	1.07184	1.07055	1.07689	0.960485	1.01952	1.01206
		4.72333	1.07132	1.07136	1.07672	0.960801	1.01974	1.01253
		4.72667	1.07184	1.06986	1.07725	0.961579	1.0192	1.01376
		4.73	1.07118	1.06996	1.07709	0.963184	1.02288	1.01406
		4.73333	1.07517	1.06962	1.07798	0.964721	1.02483	1.01482
		4.73667	1.07236	1.06949	1.0791	0.964095	1.023	1.0169
		4.74	1.0727	1.06949	1.08017	0.965402	1.02172	1.01351
		4.74333	1.0735	1.06965	1.08017	0.963421	1.01804	1.01156
		4.74667	1.07254	1.06967	1.08024	0.962757	1.01676	1.00999
		4.75	1.07085	1.06975	1.08017	0.962272	1.01838	1.01135
		4.75333	1.07255	1.06952	1.07842	0.961926	1.01967	1.00891
		4.75667	1.07357	1.06973	1.07807	0.962356	1.02093	1.01472
		4.76	1.07368	1.06986	1.0796	0.963783	1.02357	1.01612
		4.76333	1.07426	1.06948	1.07982	0.963564	1.02464	1.0192
		4.76667	1.07505	1.06865	1.07859	0.96299	1.02346	1.01879
		4.77	1.0734	1.06811	1.08032	0.963555	1.02517	1.01813
		4.77333	1.07392	1.06927	1.08016	0.961972	1.02516	1.01362
		4.77667	1.07465	1.06883	1.07816	0.961307	1.0282	1.01337
		4.78	1.07503	1.06902	1.08006	0.961092	1.02681	1.01304
		4.78333	1.07538	1.06953	1.08058	0.96159	1.0268	1.01181
		4.78667	1.07491	1.07068	1.07998	0.96127	1.02567	1.01398
		4.79	1.07466	1.0699	1.07894	0.962693	1.02313	1.01378
		4.79333	1.07287	1.07079	1.08149	0.965141	1.02111	1.01381
		4.79667	1.07448	1.07109	1.0799	0.9678	1.01992	1.01361
		4.8	1.07445	1.07222	1.08071	0.966911	1.01768	1.01301
		4.80333	1.07401	1.07271	1.08104	0.967968	1.01672	1.01386
		4.80667	1.07359	1.07104	1.08276	0.967575	1.01612	1.01684
		4.81	1.07479	1.0709	1.08102	0.966401	1.01792	1.01781
		4.81333	1.07293	1.07137	1.08213	0.964301	1.02064	1.01747
		4.81667	1.07309	1.07067	1.08369	0.966906	1.02329	1.01816
		4.82	1.07415	1.06977	1.08317	0.966494	1.02363	1.01695
		4.82333	1.07347	1.07019	1.08348	0.966741	1.02514	1.01686
		4.82667	1.07431	1.07074	1.08364	0.966707	1.02335	1.01713
		4.83	1.07293	1.07146	1.08054	0.967904	1.0244	1.01832
		4.83333	1.0764	1.07215	1.07766	0.968382	1.02365	1.01962
		4.83667	1.07356	1.07243	1.07881	0.967897	1.02433	1.01923
		4.84	1.07913	1.07375	1.07747	0.968974	1.0264	1.01726
		4.84333	1.07841	1.07416	1.07601	0.969211	1.02582	1.01798
		4.84667	1.07993	1.07268	1.07948	0.967754	1.02373	1.01678
		4.85	1.0783	1.07284	1.08072	0.967079	1.02307	1.01806
		4.85333	1.08283	1.07288	1.08141	0.967423	1.02292	1.01908
		4.85667	1.07789	1.07262	1.08164	0.966958	1.02074	1.02237
		4.86	1.07654	1.07185	1.08443	0.968265	1.02122	1.02163
		4.86333	1.07753	1.0737	1.08303	0.968276	1.02198	1.02143
		4.86667	1.07603	1.07333	1.08292	0.966877	1.02239	1.02016
		4.87	1.07382	1.07388	1.0818	0.96721	1.02385	1.02001
		4.87333	1.07347	1.07525	1.08373	0.96618	1.02384	1.01471
		4.87667	1.07589	1.07545	1.08301	0.964711	1.02346	1.01505
		4.88	1.07543	1.07486	1.08371	0.964493	1.02409	1.01606
		4.88333	1.07588	1.07539	1.0833	0.966467	1.0242	1.01815
		4.88667	1.0767	1.07439	1.08411	0.966033	1.02333	1.01755
		4.89	1.07835	1.07329	1.08216	0.967254	1.02455	1.02079
		4.89333	1.07724	1.07391	1.08318	0.967385	1.02564	1.0194
		4.89667	1.07831	1.07403	1.08272	0.968358	1.02669	1.01974
		4.9	1.07841	1.0745	1.08377	0.966144	1.02895	1.01726
		4.90333	1.0793	1.07447	1.08413	0.96765	1.03092	1.01772
		4.90667	1.07923	1.07387	1.08426	0.967811	1.0303	1.01897
		4.91	1.08056	1.0735	1.08423	0.969408	1.03059	1.019
		4.91333	1.0811	1.07432	1.08502	0.969385	1.02918	1.01884
		4.91667	1.08003	1.07324	1.08397	0.969753	1.02602	1.01916
		4.92	1.07855	1.07484	1.08374	0.966539	1.02321	1.01694
		4.92333	1.07916	1.07508	1.0842	0.964474	1.02435	1.01618
		4.92667	1.07952	1.07567	1.08484	0.962283	1.02352	1.01579
		4.93	1.07915	1.07404	1.08509	0.961706	1.02551	1.01537
		4.93333	1.0801	1.07442	1.08462	0.961514	1.02481	1.01587
		4.93667	1.08144	1.07422	1.08432	0.963655	1.02277	1.01836
		4.94	1.08307	1.07379	1.08506	0.964398	1.02452	1.01682
		4.94333	1.08155	1.07331	1.08219	0.966088	1.02462	1.01786
		4.94667	1.08101	1.07387	1.08372	0.964626	1.02454	1.01908
		4.95	1.08135	1.07456	1.08438	0.964953	1.02529	1.01902
		4.95333	1.081	1.07432	1.08508	0.96566	1.02791	1.01813
		4.95667	1.07838	1.07602	1.08601	0.968267	1.02589	1.02066
		4.96	1.07824	1.07593	1.08873	0.967614	1.02638	1.02075
		4.96333	1.0773	1.07563	1.08703	0.96978	1.02612	1.02127
		4.96667	1.0765	1.07555	1.08865	0.971485	1.02504	1.02147
		4.97	1.07678	1.07665	1.08768	0.971465	1.02507	1.02112
		4.97333	1.07815	1.07625	1.08585	0.970998	1.02554	1.01976
		4.97667	1.07788	1.07671	1.08441	0.97285	1.02663	1.01956
		4.98	1.07734	1.0771	1.08477	0.973127	1.02667	1.0193
		4.98333	1.07989	1.07677	1.08366	0.972501	1.02767	1.01904
		4.98667	1.07719	1.07507	1.085	0.971632	1.02681	1.01891
		4.99	1.07559	1.07465	1.08573	0.969986	1.02888	1.01739
		4.99333	1.07581	1.07333	1.08577	0.968498	1.02889	1.01705
		4.99667	1.07651	1.07408	1.08485	0.970337	1.03009	1.01552
		5	1.07501	1.0756	1.08516	0.970319	1.03304	1.01412
		5.00333	1.07686	1.07665	1.08437	0.972159	1.03663	1.01579
		5.00667	1.07837	1.07741	1.08493	0.974488	1.0334	1.01881
		5.01	1.07825	1.07772	1.08601	0.973177	1.03162	1.0192
		5.01333	1.08044	1.07673	1.08726	0.971896	1.02831	1.02046
		5.01667	1.0785	1.07509	1.08819	0.972027	1.02787	1.02404
		5.02	1.07888	1.07487	1.08803	0.970371	1.02829	1.02306
		5.02333	1.0782	1.0754	1.08793	0.967865	1.02765	1.0232
		5.02667	1.07958	1.07641	1.08834	0.970569	1.02902	1.02456
		5.03	1.07759	1.07747	1.08764	0.970746	1.03199	1.02496
		5.03333	1.07841	1.07747	1.08698	0.971292	1.03203	1.02482
		5.03667	1.07994	1.07736	1.08762	0.972381	1.0259	1.02497
		5.04	1.08113	1.07601	1.08608	0.973654	1.03188	1.02497
		5.04333	1.08108	1.07644	1.08583	0.972621	1.03411	1.02359
		5.04667	1.08083	1.07586	1.08608	0.971367	1.03156	1.02186
		5.05	1.08109	1.07708	1.0866	0.969924	1.03056	1.01925
		5.05333	1.07921	1.07803	1.08855	0.9684	1.03455	1.02057
		5.05667	1.07986	1.07754	1.09093	0.967433	1.03274	1.01869
		5.06	1.08072	1.07706	1.09011	0.967226	1.0289	1.01964
		5.06333	1.0787	1.0773	1.09016	0.969879	1.03178	1.01731
		5.06667	1.08087	1.0767	1.09001	0.971279	1.03038	1.01891
		5.07	1.08396	1.0771	1.08907	0.973989	1.02848	1.01845
		5.07333	1.08243	1.07872	1.08937	0.976489	1.02634	1.02079
		5.07667	1.0812	1.07989	1.09029	0.976256	1.02945	1.02073
		5.08	1.0855	1.08078	1.09253	0.974346	1.02898	1.02643
		5.08333	1.08519	1.08137	1.09267	0.973709	1.03148	1.02623
		5.08667	1.08281	1.07944	1.09258	0.970447	1.03338	1.0254
		5.09	1.08266	1.07896	1.09193	0.970179	1.03449	1.02483
		5.09333	1.08263	1.07833	1.09129	0.970404	1.03346	1.02242
		5.09667	1.08076	1.0769	1.0907	0.970778	1.03136	1.02123
		5.1	1.07998	1.07643	1.09053	0.970816	1.02916	1.02084
		5.10333	1.07982	1.07841	1.08991	0.972398	1.02633	1.02224
		5.10667	1.0811	1.07811	1.09122	0.971305	1.02933	1.02068
		5.11	1.08069	1.07814	1.0938	0.971894	1.02518	1.02277
		5.11333	1.08124	1.07907	1.09255	0.973354	1.02874	1.02141
		5.11667	1.08079	1.07808	1.09229	0.973648	1.03014	1.02211
		5.12	1.08086	1.07805	1.09232	0.97523	1.03299	1.02208
		5.12333	1.08047	1.0782	1.09126	0.975642	1.02891	1.02334
		5.12667	1.08173	1.07739	1.09078	0.976307	1.0321	1.02357
		5.13	1.0831	1.07705	1.09181	0.97621	1.02974	1.02294
		5.13333	1.08253	1.07822	1.09312	0.976616	1.03039	1.02182
		5.13667	1.08419	1.07719	1.09294	0.975526	1.03129	1.02072
		5.14	1.08522	1.07816	1.09269	0.976245	1.03268	1.0198
		5.14333	1.08377	1.07835	1.0913	0.975968	1.03396	1.01915
		5.14667	1.08316	1.0793	1.09135	0.974613	1.0362	1.02149
		5.15	1.08427	1.07913	1.0896	0.975311	1.03751	1.02133
		5.15333	1.08254	1.08016	1.08928	0.975546	1.03388	1.02238
		5.15667	1.08089	1.07974	1.0898	0.975057	1.0316	1.02333
		5.16	1.08041	1.08102	1.09021	0.975125	1.03254	1.02415
		5.16333	1.08003	1.07974	1.08843	0.976547	1.03161	1.02321
		5.16667	1.07904	1.08093	1.08884	0.975881	1.02971	1.02472
		5.17	1.07933	1.08166	1.09079	0.975871	1.03221	1.02405
		5.17333	1.08264	1.08256	1.09115	0.973855	1.0338	1.024
		5.17667	1.08338	1.08215	1.09162	0.975209	1.03371	1.02591
		5.18	1.08362	1.08366	1.0921	0.974339	1.03301	1.02623
		5.18333	1.08475	1.08274	1.09329	0.973778	1.03428	1.02645
		5.18667	1.08457	1.08258	1.09227	0.97417	1.03674	1.02729
		5.19	1.08136	1.08106	1.0918	0.976341	1.03731	1.02712
		5.19333	1.08262	1.08021	1.09203	0.974007	1.0357	1.02576
		5.19667	1.08557	1.07896	1.09533	0.974378	1.03646	1.02549
		5.2	1.08338	1.07992	1.09515	0.974043	1.03566	1.02396
		5.20333	1.08503	1.07858	1.09486	0.974374	1.0366	1.02346
		5.20667	1.08898	1.07979	1.09518	0.974606	1.03592	1.02339
		5.21	1.08809	1.08008	1.09565	0.975198	1.03794	1.02297
		5.21333	1.08535	1.08134	1.09221	0.974627	1.04023	1.0205
		5.21667	1.08666	1.07988	1.0925	0.97558	1.04196	1.02109
		5.22	1.08771	1.08079	1.09281	0.975446	1.04015	1.02236
		5.22333	1.08475	1.08016	1.09326	0.975657	1.04139	1.0224
		5.22667	1.08572	1.08035	1.09118	0.977059	1.03812	1.02321
		5.23	1.08511	1.08035	1.09279	0.976413	1.03614	1.02618
		5.23333	1.08397	1.08222	1.09168	0.977484	1.03534	1.02706
		5.23667	1.0814	1.08173	1.09259	0.977412	1.03411	1.02781
		5.24	1.0824	1.08249	1.09113	0.976104	1.03513	1.02853
		5.24333	1.08325	1.08299	1.09291	0.975717	1.03655	1.02831
		5.24667	1.08363	1.08235	1.09156	0.975814	1.03565	1.02757
		5.25	1.08537	1.08163	1.09201	0.975084	1.03698	1.02602
		5.25333	1.08684	1.0816	1.09197	0.975446	1.03829	1.02587
		5.25667	1.08662	1.08233	1.09263	0.97682	1.03739	1.024
		5.26	1.08579	1.08291	1.09154	0.976971	1.04021	1.02241
		5.26333	1.0876	1.0841	1.09279	0.978325	1.04126	1.02157
		5.26667	1.0882	1.08425	1.09341	0.977734	1.04097	1.02368
		5.27	1.08722	1.08431	1.09236	0.976199	1.04114	1.02289
		5.27333	1.08542	1.08321	1.0933	0.976676	1.03928	1.02633
		5.27667	1.08532	1.08326	1.09485	0.97542	1.03595	1.02838
		5.28	1.08493	1.08279	1.09482	0.974028	1.03382	1.02838
		5.28333	1.08508	1.08192	1.09476	0.975983	1.03158	1.02889
		5.28667	1.08602	1.08299	1.09645	0.975784	1.0338	1.02726
		5.29	1.08755	1.08229	1.09643	0.976223	1.03676	1.02431
		5.29333	1.08835	1.08154	1.0951	0.976806	1.03867	1.02231
		5.29667	1.08673	1.08108	1.09491	0.978163	1.0406	1.02465
		5.3	1.08676	1.08314	1.09509	0.976853	1.04282	1.02462
		5.30333	1.0853	1.08262	1.0946	0.979251	1.04141	1.0277
		5.30667	1.08629	1.08257	1.09506	0.978308	1.03986	1.02804
		5.31	1.08574	1.08295	1.09498	0.97944	1.0425	1.03026
		5.31333	1.08681	1.08324	1.09449	0.980211	1.04393	1.02857
		5.31667	1.08464	1.08224	1.09448	0.981478	1.04257	1.02752
		5.32	1.08983	1.08177	1.09485	0.981928	1.04082	1.02637
		5.32333	1.08728	1.08322	1.09507	0.982539	1.03965	1.02816
		5.32667	1.08784	1.083	1.09645	0.982317	1.03777	1.0287
		5.33	1.08784	1.08322	1.09633	0.982166	1.03753	1.03007
		5.33333	1.08977	1.08454	1.09693	0.981846	1.0388	1.03032
		5.33667	1.08612	1.08485	1.09659	0.980874	1.03885	1.02833
		5.34	1.0883	1.08458	1.09552	0.981379	1.04066	1.0279
		5.34333	1.08781	1.08512	1.09468	0.981745	1.04092	1.02571
		5.34667	1.08954	1.08554	1.09509	0.980575	1.03951	1.02462
		5.35	1.09043	1.08531	1.09609	0.979772	1.03989	1.0249
		5.35333	1.09069	1.0856	1.09672	0.979716	1.04088	1.02741
		5.35667	1.09048	1.08721	1.09675	0.979328	1.04058	1.02686
		5.36	1.09215	1.08675	1.09802	0.977694	1.03911	1.02808
		5.36333	1.09134	1.08779	1.09801	0.978157	1.03892	1.02784
		5.36667	1.09048	1.08673	1.09776	0.977908	1.03982	1.02567
		5.37	1.08851	1.08748	1.09678	0.977776	1.03994	1.02492
		5.37333	1.08754	1.08521	1.097	0.976891	1.03753	1.02425
		5.37667	1.08698	1.08624	1.09746	0.977969	1.03819	1.02474
		5.38	1.08787	1.08545	1.09871	0.977365	1.03922	1.02635
		5.38333	1.08908	1.08507	1.09838	0.97901	1.03638	1.02799
		5.38667	1.08982	1.08418	1.09923	0.980499	1.03614	1.02788
		5.39	1.09181	1.08563	1.10086	0.980356	1.03792	1.02981
		5.39333	1.0892	1.08542	1.09903	0.978538	1.03721	1.02876
		5.39667	1.08834	1.08482	1.09939	0.979179	1.03765	1.02851
		5.4	1.08801	1.08566	1.09945	0.979626	1.04061	1.0278
		5.40333	1.08971	1.08676	1.09912	0.978638	1.04159	1.02829
		5.40667	1.08939	1.08522	1.09987	0.979113	1.04471	1.02817
		5.41	1.09228	1.08465	1.1005	0.981663	1.04831	1.02865
		5.41333	1.09116	1.08538	1.09868	0.981704	1.04657	1.02666
		5.41667	1.09128	1.08476	1.09899	0.980428	1.04419	1.02761
		5.42	1.09233	1.08384	1.09988	0.980165	1.04409	1.02661
		5.42333	1.09218	1.08447	1.09804	0.980595	1.04224	1.02662
		5.42667	1.09032	1.08444	1.09795	0.979669	1.03896	1.02733
		5.43	1.09074	1.08425	1.09987	0.981012	1.04082	1.02761
		5.43333	1.09018	1.08502	1.09976	0.980294	1.04203	1.0278
		5.43667	1.08871	1.08605	1.09844	0.981156	1.04161	1.02986
		5.44	1.08843	1.08653	1.09787	0.980547	1.04264	1.03033
		5.44333	1.08862	1.08641	1.09782	0.9812	1.0452	1.02975
		5.44667	1.0916	1.08661	1.09767	0.981035	1.04591	1.03098
		5.45	1.08773	1.08529	1.09746	0.981737	1.04452	1.03029
		5.45333	1.08991	1.08431	1.09808	0.980845	1.04329	1.0277
		5.45667	1.08767	1.0848	1.09897	0.98122	1.04485	1.02743
		5.46	1.09051	1.08537	1.10061	0.980857	1.04377	1.0269
		5.46333	1.08881	1.08532	1.10027	0.98059	1.04081	1.02809
		5.46667	1.09398	1.08682	1.10103	0.981046	1.04374	1.02812
		5.47	1.09028	1.08699	1.10084	0.981547	1.04652	1.02887
		5.47333	1.09415	1.0874	1.1011	0.982226	1.04326	1.02932
		5.47667	1.0931	1.08788	1.10119	0.982549	1.04367	1.03055
		5.48	1.09385	1.08739	1.10065	0.982425	1.04573	1.03001
		5.48333	1.0934	1.08596	1.10026	0.983002	1.04337	1.0307
		5.48667	1.09609	1.08814	1.10025	0.98457	1.04092	1.03231
		5.49	1.09467	1.08706	1.10028	0.983504	1.04317	1.03067
		5.49333	1.09505	1.08687	1.09997	0.983804	1.04305	1.03073
		5.49667	1.09452	1.08708	1.10034	0.983997	1.0417	1.02926
		5.5	1.09423	1.08824	1.09862	0.982845	1.04211	1.02807
		5.50333	1.09327	1.08683	1.09756	0.980673	1.04273	1.0282
		5.50667	1.09283	1.08852	1.09835	0.982168	1.0405	1.02779
		5.51	1.09273	1.08841	1.09722	0.982064	1.04106	1.02799
		5.51333	1.09212	1.08751	1.09695	0.982425	1.0431	1.02889
		5.51667	1.09283	1.08752	1.0982	0.983523	1.04178	1.03048
		5.52	1.0939	1.08659	1.10001	0.984494	1.04312	1.02837
		5.52333	1.09425	1.08564	1.09774	0.982593	1.04724	1.02917
		5.52667	1.09544	1.08611	1.09931	0.983211	1.04829	1.02838
		5.53	1.09486	1.0876	1.10023	0.982331	1.04836	1.02947
		5.53333	1.09535	1.08833	1.10055	0.983513	1.04843	1.02902
		5.53667	1.09482	1.08998	1.10003	0.984865	1.04568	1.03063
		5.54	1.09462	1.09026	1.10085	0.984809	1.04422	1.03056
		5.54333	1.09237	1.09092	1.10006	0.983577	1.04204	1.03026
		5.54667	1.09383	1.09077	1.09961	0.982815	1.04332	1.02873
		5.55	1.09397	1.09007	1.0998	0.981924	1.04774	1.02969
		5.55333	1.09339	1.08883	1.10072	0.980781	1.05211	1.02881
		5.55667	1.09402	1.08788	1.10193	0.981519	1.05173	1.03139
		5.56	1.09146	1.08612	1.10357	0.981864	1.0523	1.02964
		5.56333	1.09514	1.08619	1.10369	0.983793	1.05049	1.03079
		5.56667	1.08903	1.08589	1.10363	0.983004	1.04809	1.0295
		5.57	1.09448	1.08552	1.10339	0.983717	1.04724	1.03009
		5.57333	1.09057	1.08671	1.1038	0.985321	1.04741	1.02648
		5.57667	1.09414	1.08802	1.10116	0.985774	1.04562	1.02904
		5.58	1.08944	1.08911	1.10273	0.98497	1.04417	1.03031
		5.58333	1.09505	1.08906	1.10242	0.985289	1.04578	1.03016
		5.58667	1.08985	1.08942	1.10166	0.983837	1.04366	1.03138
		5.59	1.09394	1.09094	1.10052	0.983033	1.04366	1.03337
		5.59333	1.09292	1.09195	1.10205	0.983691	1.04604	1.03321
		5.59667	1.09412	1.09115	1.09948	0.983698	1.04925	1.03043
		5.6	1.09436	1.0925	1.09891	0.984549	1.04899	1.03095
		5.60333	1.09438	1.09279	1.09906	0.986578	1.05164	1.03023
		5.60667	1.09415	1.09003	1.09942	0.987098	1.0535	1.03007
		5.61	1.09511	1.08935	1.0997	0.987202	1.05291	1.03082
		5.61333	1.09297	1.08968	1.10198	0.988801	1.04967	1.03335
		5.61667	1.09191	1.08932	1.10102	0.989283	1.05003	1.03349
		5.62	1.09171	1.09064	1.1011	0.986399	1.04804	1.03375
		5.62333	1.09235	1.09233	1.10165	0.985718	1.04467	1.03482
		5.62667	1.09242	1.09281	1.10138	0.986056	1.04388	1.03392
		5.63	1.09513	1.0931	1.0999	0.985623	1.04494	1.03271
		5.63333	1.09659	1.09326	1.10219	0.985718	1.04244	1.03265
		5.63667	1.09719	1.09324	1.10255	0.988709	1.04023	1.03303
		5.64	1.09843	1.09377	1.103	0.98888	1.04472	1.03366
		5.64333	1.10048	1.09379	1.10346	0.987951	1.04734	1.03377
		5.64667	1.09887	1.09207	1.10473	0.988099	1.04854	1.03299
		5.65	1.09839	1.09333	1.10403	0.988297	1.05255	1.03396
		5.65333	1.09989	1.09173	1.10435	0.988655	1.05462	1.03222
		5.65667	1.09816	1.09124	1.10375	0.989479	1.05065	1.03174
		5.66	1.0959	1.09029	1.10171	0.989319	1.0498	1.03225
		5.66333	1.09634	1.09175	1.10068	0.988952	1.05029	1.03248
		5.66667	1.09715	1.09116	1.101	0.98825	1.05055	1.02948
		5.67	1.09564	1.09186	1.10046	0.986909	1.05096	1.03019
		5.67333	1.09532	1.0913	1.09909	0.987201	1.05248	1.02947
		5.67667	1.09757	1.09121	1.10126	0.987373	1.05379	1.02828
		5.68	1.09441	1.09058	1.10226	0.987256	1.05389	1.02991
		5.68333	1.09489	1.08978	1.10249	0.986875	1.05176	1.03249
		5.68667	1.09663	1.0893	1.10232	0.986685	1.05323	1.03338
		5.69	1.09342	1.09056	1.10438	0.986125	1.05531	1.03381
		5.69333	1.09098	1.09093	1.10426	0.986246	1.0545	1.03525
		5.69667	1.0943	1.09111	1.10394	0.986787	1.05307	1.03323
		5.7	1.09365	1.09248	1.10388	0.988916	1.05368	1.03432
		5.70333	1.09342	1.09238	1.10516	0.98898	1.05369	1.03241
		5.70667	1.09881	1.09309	1.10459	0.989468	1.04984	1.03165
		5.71	1.09932	1.09383	1.10394	0.988907	1.04861	1.03038
		5.71333	1.09871	1.0943	1.10613	0.987456	1.0467	1.03089
		5.71667	1.09857	1.09298	1.10747	0.985383	1.04431	1.03014
		5.72	1.09658	1.09441	1.10654	0.986058	1.04483	1.03082
		5.72333	1.09686	1.09246	1.10664	0.986043	1.04768	1.03096
		5.72667	1.09718	1.09219	1.10763	0.985966	1.04767	1.03127
		5.73	1.09933	1.09406	1.1043	0.986411	1.05111	1.03259
		5.73333	1.09855	1.0952	1.10424	0.986792	1.05162	1.03102
		5.73667	1.09991	1.09498	1.10477	0.98768	1.04787	1.03222
		5.74	1.10089	1.09531	1.10333	0.98882	1.04814	1.03238
		5.74333	1.10241	1.09658	1.1031	0.991961	1.04975	1.035
		5.74667	1.10144	1.09434	1.10363	0.992497	1.04835	1.03438
		5.75	1.10159	1.09404	1.10229	0.992948	1.05015	1.03375
		5.75333	1.10144	1.09431	1.10249	0.992253	1.05381	1.03431
		5.75667	1.09832	1.09399	1.10307	0.99126	1.05326	1.03475
		5.76	1.09709	1.09329	1.10427	0.989978	1.05191	1.03322
		5.76333	1.09535	1.09454	1.1038	0.989852	1.0551	1.034
		5.76667	1.09454	1.09321	1.10275	0.989912	1.05367	1.03685
		5.77	1.09818	1.09328	1.10201	0.99039	1.05014	1.03781
		5.77333	1.10223	1.09409	1.10204	0.991576	1.04962	1.03856
		5.77667	1.10055	1.09357	1.10073	0.99125	1.0507	1.03938
		5.78	1.10237	1.0934	1.10181	0.991834	1.04894	1.03987
		5.78333	1.10435	1.09412	1.10375	0.991979	1.04932	1.03853
		5.78667	1.1001	1.09398	1.10412	0.993385	1.05168	1.03445
		5.79	1.09896	1.09313	1.10566	0.992664	1.05259	1.03323
		5.79333	1.10242	1.09298	1.10564	0.991755	1.05258	1.0313
		5.79667	1.10301	1.09354	1.10471	0.991182	1.05263	1.02922
		5.8	1.0996	1.0937	1.1052	0.991551	1.05457	1.02954
		5.80333	1.10221	1.09436	1.10655	0.990368	1.05423	1.03058
		5.80667	1.10463	1.09458	1.10624	0.990061	1.05211	1.02957
		5.81	1.10196	1.09554	1.10599	0.990482	1.05343	1.03053
		5.81333	1.10182	1.09541	1.10843	0.991551	1.05399	1.03237
		5.81667	1.10574	1.09425	1.10775	0.990555	1.05449	1.03055
		5.82	1.10593	1.09374	1.10716	0.990276	1.05686	1.03186
		5.82333	1.10136	1.09498	1.10539	0.988416	1.0586	1.03468
		5.82667	1.10124	1.09558	1.10639	0.989345	1.05669	1.03511
		5.83	1.10061	1.09422	1.10563	0.990054	1.05676	1.03341
		5.83333	1.10181	1.09609	1.10473	0.992026	1.05634	1.03648
		5.83667	1.09963	1.09564	1.10336	0.992191	1.05432	1.03742
		5.84	1.10175	1.09529	1.10583	0.993951	1.05547	1.03606
		5.84333	1.1019	1.09472	1.10498	0.993035	1.05664	1.03473
		5.84667	1.10149	1.09539	1.1047	0.992543	1.05672	1.03601
		5.85	1.0988	1.0958	1.10536	0.990593	1.0561	1.03564
		5.85333	1.09959	1.09631	1.10706	0.991449	1.05597	1.03521
		5.85667	1.09806	1.09728	1.10623	0.990608	1.05504	1.03592
		5.86	1.09797	1.09654	1.10789	0.991575	1.05411	1.03748
		5.86333	1.09791	1.09748	1.10814	0.990724	1.05346	1.03894
		5.86667	1.10013	1.09662	1.10893	0.991169	1.05528	1.04045
		5.87	1.10055	1.09658	1.10796	0.99096	1.05748	1.04062
		5.87333	1.10176	1.09612	1.10851	0.993222	1.05765	1.04279
		5.87667	1.10257	1.09601	1.10763	0.993777	1.05784	1.04211
		5.88	1.10333	1.09619	1.10812	0.994543	1.05817	1.04261
		5.88333	1.1013	1.09663	1.10701	0.994792	1.05559	1.0394
		5.88667	1.10056	1.09698	1.10752	0.993548	1.05422	1.03892
		5.89	1.10071	1.09652	1.10635	0.991703	1.05301	1.03705
		5.89333	1.1021	1.09664	1.10548	0.989438	1.05431	1.03734
		5.89667	1.10274	1.09542	1.10451	0.989906	1.05512	1.03613
		5.9	1.10407	1.09611	1.1052	0.991001	1.0565	1.03776
		5.90333	1.10413	1.09679	1.1058	0.991403	1.05713	1.03744
		5.90667	1.10351	1.09746	1.10641	0.992293	1.05869	1.03724
		5.91	1.10036	1.09721	1.10651	0.995451	1.0583	1.0368
		5.91333	1.10277	1.09868	1.10844	0.994429	1.05631	1.03586
		5.91667	1.10349	1.09868	1.10791	0.994599	1.0569	1.03406
		5.92	1.1011	1.09794	1.10874	0.995996	1.05759	1.03466
		5.92333	1.10259	1.09866	1.10972	0.996167	1.05798	1.03601
		5.92667	1.1039	1.09945	1.11023	0.995408	1.05626	1.0348
		5.93	1.10225	1.09901	1.10929	0.995957	1.05879	1.03672
		5.93333	1.10065	1.09806	1.11039	0.99511	1.05869	1.03645
		5.93667	1.10388	1.0988	1.11021	0.993179	1.05836	1.03666
		5.94	1.10333	1.09781	1.11011	0.993743	1.05561	1.03444
		5.94333	1.10458	1.09785	1.11057	0.99414	1.0583	1.03491
		5.94667	1.10519	1.09755	1.11023	0.99283	1.05963	1.03338
		5.95	1.10517	1.09837	1.11053	0.993336	1.06052	1.03359
		5.95333	1.10626	1.09783	1.11014	0.994049	1.06173	1.03291
		5.95667	1.10602	1.09878	1.1099	0.993193	1.06439	1.03587
		5.96	1.10438	1.09855	1.11172	0.992591	1.06235	1.0376
		5.96333	1.10349	1.09794	1.11375	0.993524	1.06012	1.03895
		5.96667	1.10634	1.09746	1.11373	0.993229	1.05823	1.03901
		5.97	1.10532	1.09828	1.11365	0.994538	1.05656	1.03908
		5.97333	1.10692	1.09799	1.11349	0.992827	1.05483	1.03672
		5.97667	1.1089	1.09872	1.11215	0.992395	1.05617	1.03341
		5.98	1.10783	1.09912	1.10895	0.992228	1.05656	1.03199
		5.98333	1.10526	1.09988	1.107	0.992548	1.05516	1.03388
		5.98667	1.10415	1.09905	1.1077	0.992285	1.05385	1.03427
		5.99	1.10342	1.09873	1.10748	0.994127	1.05246	1.03713
		5.99333	1.1052	1.09738	1.10809	0.995777	1.05208	1.03959
		5.99667	1.10722	1.09865	1.10817	0.996815	1.05276	1.03989
		6	1.10861	1.09913	1.11126	0.995869	1.05534	1.03796
		6.00333	1.10915	1.09945	1.11005	0.995949	1.05765	1.03839
		6.00667	1.10981	1.09911	1.11027	0.994872	1.06054	1.03679
		6.01	1.10787	1.10068	1.10936	0.993215	1.06041	1.03571
		6.01333	1.1084	1.09976	1.11209	0.991983	1.05789	1.03827
		6.01667	1.10867	1.09897	1.11012	0.991512	1.05768	1.03891
		6.02	1.11005	1.0985	1.11047	0.990494	1.05566	1.03924
		6.02333	1.11061	1.10001	1.11058	0.991461	1.05657	1.04011
		6.02667	1.1103	1.09962	1.11129	0.991897	1.05725	1.04062
		6.03	1.11019	1.10019	1.11084	0.99083	1.05927	1.04001
		6.03333	1.11096	1.10044	1.10952	0.992951	1.05936	1.04006
		6.03667	1.11038	1.10119	1.11051	0.993142	1.06024	1.03939
		6.04	1.10837	1.09917	1.11065	0.995455	1.0584	1.03623
		6.04333	1.1066	1.09816	1.10996	0.995546	1.05516	1.03767
		6.04667	1.10587	1.09864	1.10948	0.996292	1.0548	1.03676
		6.05	1.10385	1.09866	1.11118	0.996345	1.05559	1.03979
		6.05333	1.10389	1.09915	1.11102	0.997838	1.05625	1.04017
		6.05667	1.10485	1.09992	1.11153	0.995095	1.05591	1.04361
		6.06	1.10648	1.10115	1.1104	0.995881	1.05963	1.04386
		6.06333	1.10409	1.10009	1.10954	0.996884	1.06001	1.04106
		6.06667	1.10933	1.10033	1.11028	0.997123	1.05814	1.04004
		6.07	1.10911	1.09971	1.10846	0.997031	1.05952	1.04034
		6.07333	1.10667	1.10038	1.10712	0.997741	1.06046	1.03905
		6.07667	1.10905	1.10101	1.10694	0.996481	1.05943	1.03706
		6.08	1.11075	1.10156	1.10684	0.998094	1.06089	1.0403
		6.08333	1.10672	1.10033	1.10664	0.996003	1.0616	1.03923
		6.08667	1.10646	1.10079	1.10756	0.997581	1.06163	1.03924
		6.09	1.10868	1.10036	1.10758	0.998072	1.06282	1.04187
		6.09333	1.10708	1.10002	1.10949	0.998991	1.06324	1.04425
		6.09667	1.10753	1.10036	1.10988	0.998987	1.06272	1.0429
		6.1	1.10819	1.10238	1.10994	0.998868	1.06306	1.04219
		6.10333	1.10785	1.10128	1.10957	0.997591	1.06291	1.03992
		6.10667	1.10839	1.1018	1.11034	0.997935	1.06428	1.0377
		6.11	1.11074	1.10274	1.10867	0.999287	1.0653	1.0368
		6.11333	1.11003	1.10044	1.10929	0.999429	1.06478	1.03798
		6.11667	1.1109	1.10073	1.10854	1.0015	1.0649	1.0399
		6.12	1.11291	1.10042	1.10869	1.00222	1.06402	1.03992
		6.12333	1.11247	1.10016	1.10859	1.00129	1.06161	1.0402
		6.12667	1.11237	1.10028	1.11011	1.00131	1.06012	1.04121
		6.13	1.11235	1.10158	1.11022	1.00065	1.05727	1.04098
		6.13333	1.11173	1.10011	1.11016	0.999549	1.05478	1.04169
		6.13667	1.11066	1.102	1.11327	0.999766	1.05482	1.04386
		6.14	1.11168	1.10281	1.11396	1.00026	1.05475	1.04352
		6.14333	1.10896	1.10113	1.11167	0.998926	1.05341	1.04185
		6.14667	1.10904	1.10269	1.11232	0.998857	1.05632	1.04205
		6.15	1.10832	1.10382	1.11322	0.999973	1.05807	1.0402
		6.15333	1.10875	1.10342	1.11147	0.997248	1.05819	1.04078
		6.15667	1.10811	1.10289	1.11055	0.997597	1.05868	1.04107
		6.16	1.11072	1.10334	1.11323	0.998105	1.061	1.04307
		6.16333	1.11327	1.10242	1.11231	0.998441	1.05909	1.04243
		6.16667	1.11096	1.10105	1.11055	0.997003	1.05877	1.04175
		6.17	1.11323	1.10077	1.10823	0.999013	1.05945	1.04042
		6.17333	1.11622	1.10099	1.10918	0.999775	1.05852	1.04101
		6.17667	1.11428	1.10177	1.10829	0.998812	1.05816	1.0384
		6.18	1.11277	1.10174	1.10872	0.998468	1.06297	1.03761
		6.18333	1.11569	1.10219	1.10994	1.0002	1.06539	1.03905
		6.18667	1.11302	1.10336	1.11204	1.00064	1.06705	1.04084
		6.19	1.11038	1.10318	1.11114	0.999747	1.06919	1.03998
		6.19333	1.11205	1.1034	1.1121	1.00173	1.06904	1.04066
		6.19667	1.11263	1.10389	1.11044	1.00213	1.06711	1.04076
		6.2	1.11287	1.10516	1.11287	1.00036	1.06541	1.04094
		6.20333	1.11386	1.10355	1.11238	0.999329	1.06347	1.03959
		6.20667	1.11408	1.10315	1.11241	1.00008	1.06259	1.04126
		6.21	1.11456	1.10289	1.1113	0.999186	1.06344	1.04118
		6.21333	1.11542	1.10261	1.11213	0.998887	1.06481	1.04282
		6.21667	1.11506	1.10125	1.10973	1.00162	1.06761	1.04069
		6.22	1.11644	1.10252	1.11003	1.002	1.06775	1.04035
		6.22333	1.11663	1.10415	1.11035	1.00264	1.06761	1.03744
		6.22667	1.11592	1.10429	1.11217	1.00253	1.06743	1.03627
		6.23	1.11618	1.104	1.11247	1.00433	1.06505	1.03582
		6.23333	1.1159	1.1047	1.1134	1.0038	1.06389	1.03826
		6.23667	1.11487	1.10412	1.11221	1.00373	1.0641	1.03822
		6.24	1.11484	1.10366	1.11273	1.00332	1.0646	1.03879
		6.24333	1.11306	1.10318	1.1122	1.00174	1.06554	1.0417
		6.24667	1.11122	1.10405	1.11385	1.00061	1.06767	1.04371
		6.25	1.11096	1.103	1.11397	1.00015	1.06884	1.04165
		6.25333	1.11078	1.10379	1.11442	0.99992	1.07029	1.04371
		6.25667	1.11112	1.10271	1.11492	1.00059	1.07219	1.04391
		6.26	1.11396	1.1035	1.11539	1.0024	1.07325	1.04423
		6.26333	1.11724	1.10235	1.11281	1.00369	1.07362	1.04342
		6.26667	1.11775	1.10365	1.11191	1.00433	1.0716	1.04531
		6.27	1.11781	1.10319	1.11299	1.00579	1.07028	1.04299
		6.27333	1.12029	1.10259	1.11192	1.00581	1.06905	1.04212
		6.27667	1.11763	1.1022	1.11211	1.00569	1.06829	1.0422
		6.28	1.11624	1.10423	1.11477	1.00449	1.06769	1.04142
		6.28333	1.11688	1.10481	1.11491	1.0033	1.06648	1.04162
		6.28667	1.11606	1.10511	1.11512	1.00279	1.06525	1.0418
		6.29	1.11339	1.10643	1.11683	1.00216	1.06603	1.04313
		6.29333	1.11512	1.10633	1.11583	1.00045	1.06618	1.04142
		6.29667	1.11455	1.10552	1.11463	1.00067	1.06419	1.03969
		6.3	1.11431	1.10475	1.11547	1.00118	1.06586	1.0401
		6.30333	1.11581	1.10409	1.11529	1.00113	1.06738	1.04057
		6.30667	1.11539	1.10425	1.11383	1.00074	1.06637	1.04158
		6.31	1.11538	1.10425	1.11464	1.00336	1.06509	1.041
		6.31333	1.11283	1.10379	1.1149	1.00282	1.06593	1.0444
		6.31667	1.11366	1.10354	1.11489	1.00367	1.06729	1.0448
		6.32	1.11313	1.1047	1.11314	1.00167	1.06711	1.04517
		6.32333	1.11355	1.105	1.11355	1.0025	1.06852	1.04472
		6.32667	1.11476	1.10485	1.11626	1.00197	1.06939	1.04416
		6.33	1.11823	1.10511	1.11833	1.00255	1.07164	1.04434
		6.33333	1.11718	1.10721	1.1187	1.0024	1.07101	1.04362
		6.33667	1.11821	1.10583	1.119	1.00506	1.07219	1.04444
		6.34	1.11961	1.10474	1.11896	1.0046	1.07239	1.04503
		6.34333	1.11942	1.10584	1.11635	1.00478	1.07304	1.04794
		6.34667	1.11918	1.10626	1.11415	1.0052	1.07247	1.04563
		6.35	1.11969	1.10574	1.11306	1.0046	1.07252	1.04611
		6.35333	1.12013	1.10576	1.11559	1.00441	1.07252	1.045
		6.35667	1.11899	1.10741	1.11542	1.00464	1.07198	1.0437
		6.36	1.1187	1.10758	1.11631	1.00493	1.07117	1.0429
		6.36333	1.11923	1.10686	1.11571	1.00426	1.06973	1.04447
		6.36667	1.11921	1.1068	1.11773	1.00465	1.07024	1.04287
		6.37	1.11824	1.10728	1.11544	1.00364	1.07234	1.04403
		6.37333	1.11894	1.10686	1.11585	1.00341	1.07201	1.04487
		6.37667	1.11828	1.10506	1.11589	1.00315	1.07485	1.04412
		6.38	1.11856	1.10516	1.1159	1.00499	1.07421	1.04134
		6.38333	1.11864	1.10392	1.11474	1.00528	1.07338	1.0432
		6.38667	1.12005	1.1048	1.11616	1.00589	1.06922	1.04359
		6.39	1.12143	1.10442	1.1163	1.00484	1.07112	1.04264
		6.39333	1.12319	1.10489	1.11541	1.00484	1.06919	1.0423
		6.39667	1.12118	1.10645	1.11624	1.00406	1.06867	1.04373
		6.4	1.12179	1.10684	1.11702	1.00352	1.06974	1.04337
		6.40333	1.12205	1.10559	1.11705	1.00417	1.07067	1.04333
		6.40667	1.11855	1.106	1.11778	1.00653	1.06877	1.04374
		6.41	1.11692	1.10649	1.11852	1.0066	1.0658	1.04496
		6.41333	1.11745	1.10657	1.11804	1.00616	1.06717	1.04647
		6.41667	1.11582	1.10716	1.11708	1.00642	1.06353	1.04616
		6.42	1.11368	1.1078	1.11854	1.00611	1.06258	1.0446
		6.42333	1.11548	1.10746	1.11814	1.0049	1.06214	1.04495
		6.42667	1.11562	1.10796	1.117	1.00501	1.06594	1.04466
		6.43	1.11595	1.10715	1.11994	1.00483	1.06524	1.04401
		6.43333	1.11661	1.10739	1.12005	1.0061	1.06933	1.04512
		6.43667	1.11751	1.10662	1.11827	1.00694	1.07136	1.0459
		6.44	1.11794	1.10543	1.11848	1.00803	1.06982	1.04714
		6.44333	1.11817	1.10576	1.11877	1.00832	1.06807	1.04798
		6.44667	1.11821	1.10683	1.11625	1.00915	1.0693	1.04647
		6.45	1.1203	1.10588	1.11606	1.00936	1.06853	1.04701
		6.45333	1.12087	1.10681	1.11697	1.00938	1.06892	1.04696
		6.45667	1.12055	1.10833	1.11865	1.00902	1.07052	1.04599
		6.46	1.11961	1.10815	1.11793	1.00945	1.07072	1.04337
		6.46333	1.11931	1.10794	1.1188	1.00835	1.07238	1.04342
		6.46667	1.11732	1.10817	1.11907	1.00699	1.07273	1.04171
		6.47	1.11572	1.108	1.11904	1.00623	1.07423	1.04029
		6.47333	1.11719	1.10871	1.1175	1.00663	1.07554	1.03982
		6.47667	1.11985	1.10901	1.11765	1.00755	1.07761	1.0423
		6.48	1.12025	1.10791	1.11745	1.009	1.07612	1.04292
		6.48333	1.12116	1.10852	1.11732	1.00844	1.07598	1.04242
		6.48667	1.12155	1.10975	1.1178	1.00773	1.07401	1.04272
		6.49	1.11977	1.10906	1.11811	1.00663	1.07273	1.04312
		6.49333	1.11752	1.10767	1.11982	1.00505	1.07168	1.04379
		6.49667	1.11793	1.10866	1.1182	1.00367	1.0716	1.04358
		6.5	1.11971	1.10766	1.12004	1.00427	1.07107	1.04423
		6.50333	1.11995	1.10716	1.11817	1.00541	1.0721	1.04363
		6.50667	1.12259	1.10729	1.1191	1.00659	1.07342	1.04448
		6.51	1.12358	1.10861	1.11755	1.00752	1.07499	1.04273
		6.51333	1.12601	1.10763	1.11991	1.00698	1.07547	1.04289
		6.51667	1.12496	1.1085	1.1175	1.00763	1.07554	1.04229
		6.52	1.12601	1.1077	1.11923	1.00706	1.07562	1.04557
		6.52333	1.12386	1.1077	1.11747	1.00789	1.07564	1.04488
		6.52667	1.12406	1.10687	1.11773	1.00821	1.07433	1.0467
		6.53	1.12273	1.10751	1.11658	1.00959	1.07506	1.04735
		6.53333	1.12315	1.10756	1.11893	1.00943	1.07298	1.04817
		6.53667	1.12417	1.10825	1.1182	1.00946	1.07253	1.04816
		6.54	1.12407	1.10847	1.11906	1.00771	1.07445	1.04831
		6.54333	1.12099	1.10843	1.11911	1.00692	1.07532	1.0468
		6.54667	1.12008	1.10841	1.12034	1.00734	1.07368	1.0474
		6.55	1.12196	1.10818	1.1181	1.00862	1.07665	1.04788
		6.55333	1.12096	1.10885	1.11995	1.00955	1.07785	1.04574
		6.55667	1.12267	1.10769	1.12026	1.00979	1.07538	1.04575
		6.56	1.12628	1.10991	1.12091	1.01003	1.07389	1.04674
		6.56333	1.12699	1.10978	1.12038	1.00821	1.07517	1.04665
		6.56667	1.12597	1.11111	1.12099	1.00797	1.07562	1.04793
		6.57	1.12567	1.11032	1.12069	1.00724	1.07542	1.0486
		6.57333	1.12497	1.11165	1.12108	1.00831	1.07676	1.04765
		6.57667	1.12343	1.10977	1.12016	1.00905	1.07966	1.04558
		6.58	1.1221	1.11049	1.11931	1.00917	1.07858	1.04595
		6.58333	1.1205	1.1093	1.12179	1.00706	1.07882	1.04499
		6.58667	1.12077	1.10932	1.12043	1.00725	1.07776	1.04638
		6.59	1.11979	1.10917	1.1198	1.00781	1.0769	1.04744
		6.59333	1.12226	1.11021	1.12179	1.00598	1.07149	1.04968
		6.59667	1.12546	1.11053	1.12234	1.0053	1.07121	1.05082
		6.6	1.12641	1.11149	1.122	1.00628	1.07023	1.05018
		6.60333	1.12782	1.11118	1.12253	1.00512	1.07011	1.04927
		6.60667	1.12953	1.11022	1.12288	1.00541	1.07144	1.04787
		6.61	1.12768	1.10964	1.12058	1.00544	1.07617	1.04729
		6.61333	1.12479	1.10911	1.1216	1.00523	1.07753	1.04633
		6.61667	1.12278	1.10699	1.11982	1.00477	1.0765	1.04534
		6.62	1.12054	1.10747	1.1197	1.00608	1.07672	1.04477
		6.62333	1.11981	1.10861	1.1174	1.00495	1.07576	1.04804
		6.62667	1.12034	1.10906	1.11979	1.0091	1.07439	1.04954
		6.63	1.12246	1.10905	1.11862	1.01092	1.07538	1.05055
		6.63333	1.12485	1.11182	1.11895	1.01206	1.07899	1.05048
		6.63667	1.12597	1.11181	1.12023	1.01154	1.07801	1.05205
		6.64	1.12633	1.11265	1.12379	1.01013	1.07925	1.04907
		6.64333	1.12514	1.11246	1.12193	1.00582	1.08004	1.04624
		6.64667	1.12316	1.11186	1.12217	1.00632	1.07994	1.04503
		6.65	1.12458	1.11055	1.12313	1.00581	1.07806	1.04566
		6.65333	1.12455	1.11146	1.12306	1.00616	1.07946	1.04552
		6.65667	1.12594	1.10974	1.12154	1.00769	1.07782	1.0459
[truncated: 19,152 more rows]
